# Supplementary material for: Multiscale analysis reveals that diet-dependent midgut plasticity emerges from alterations in both stem cell niche coupling and enterocyte size
Source: eLife. 2021 Sep 23;10:e64125. doi: 10.7554/eLife.64125 (PMC8528489; doi:10.7554/eLife.64125)
Supplement: Figure 1—figure supplement 1—source data 1. [file elife-64125-fig1-figsupp1-data1.csv]

Line	Diet	Day	Repeat	GutNumber	Total.W	Total.L
CantonS	HS	5	1	1	420.536	3596.588
CantonS	HS	5	1	2	449.217	4351.721
CantonS	HS	5	1	3	509.371	4961.291
CantonS	HS	5	1	4	458.138	4386.656
CantonS	HS	5	1	5	484.7	5480.926
CantonS	HS	5	1	6	493.077	4027.265
CantonS	HS	5	2	1	524.496	4685.505
CantonS	HS	5	2	2	460.376	4692.351
CantonS	HS	5	2	3	455.819	4385.961
CantonS	HS	5	2	4	484.466	4221.276
CantonS	HS	5	2	5	574.934	3833.513
CantonS	HS	5	2	6	534.315	4094.097
CantonS	HS	5	2	7	589.003	3811.099
CantonS	HS	5	3	1	517.811	4219.883
CantonS	HS	5	3	2	375.2	4810.917
CantonS	HS	5	3	3	403.007	4068.906
CantonS	HS	5	3	4	393.957	4024.459
CantonS	HS	5	3	5	409.422	4278.586
CantonS	HS	5	3	6	431.08	4253.721
CantonS	HS	5	3	7	536.793	3629.748
CantonS	HY	5	1	1	603.421	6568.873
CantonS	HY	5	1	2	620.711	5931.214
CantonS	HY	5	1	3	526.726	4184.758
CantonS	HY	5	1	4	622.951	6313.053
CantonS	HY	5	1	5	521.372	5252.386
CantonS	HY	5	1	6	670.323	5771.792
CantonS	HY	5	1	7	717.823	5334.933
CantonS	HY	5	2	1	784.137	5214.801
CantonS	HY	5	2	2	723.213	5977.244
CantonS	HY	5	2	3	703.21	6022.377
CantonS	HY	5	2	4	757.653	5227.102
CantonS	HY	5	2	5	799.247	5191.369
CantonS	HY	5	2	6	833.734	4346.24
CantonS	HY	5	2	7	841.82	4889.208
CantonS	HY	5	3	1	684.674	5778.887
CantonS	HY	5	3	2	577.316	5126.84
CantonS	HY	5	3	3	623.904	5729.315
CantonS	HY	5	3	4	695.867	5986.33
CantonS	HY	5	3	5	682.208	6429.261
CantonS	HY	5	3	6	760.437	5592.267
CantonS	HY	5	3	7	738.925	6899.532
