# Supplementary material for: Multiscale analysis reveals that diet-dependent midgut plasticity emerges from alterations in both stem cell niche coupling and enterocyte size
Source: eLife. 2021 Sep 23;10:e64125. doi: 10.7554/eLife.64125 (PMC8528489; doi:10.7554/eLife.64125)
Supplement: Figure 1—figure supplement 1—source data 2. [file elife-64125-fig1-figsupp1-data2.csv]

Line	Diet	Day	Repeat	Total.L
CantonS	BL Molasses	5	2	5488.894
CantonS	BL Molasses	5	2	3158.918
CantonS	BL Molasses	5	2	5352.426
CantonS	BL Molasses	5	3	5157.408
CantonS	BL Molasses	5	3	6174.071
CantonS	BL Molasses	5	3	5268.478
CantonS	BL Molasses	5	3	5777.002
CantonS	BL Molasses	5	3	5210.913
CantonS	BL Molasses	5	3	5186.857
CantonS	BL Molasses	5	3	6021.658
CantonS	BL Molasses	5	3	6321.376
CantonS	BL Molasses	5	3	6071.243
CantonS	BL Cornmeal	5	2	4576.296
CantonS	BL Cornmeal	5	2	5639.082
CantonS	BL Cornmeal	5	2	3876.968
CantonS	BL Cornmeal	5	2	4356.432
CantonS	BL Cornmeal	5	2	4654.371
CantonS	HY	5	2	5266.836
CantonS	HY	5	2	4803.778
CantonS	HY	5	2	4972.687
CantonS	HY	5	2	3481.299
CantonS	HY	5	2	5502.621
CantonS	HY	5	2	6091.923
CantonS	HY	5	2	5407.22
CantonS	HY	5	2	5506.668
CantonS	HY	5	2	5453.787
CantonS	HY	5	2	4862.56
CantonS	HS	5	2	3854.763
CantonS	HS	5	2	3698.701
CantonS	HS	5	2	2978.237
CantonS	HS	5	2	2858.032
CantonS	HS	5	2	3843.074
CantonS	HS	5	2	4085.073
CantonS	BL Cornmeal	5	3	5169.36
CantonS	BL Cornmeal	5	3	5479.855
CantonS	BL Cornmeal	5	3	6344.967
CantonS	BL Cornmeal	5	3	5223.523
CantonS	BL Cornmeal	5	3	5522.931
CantonS	BL Cornmeal	5	3	5268.318
CantonS	BL Cornmeal	5	3	5417.735
CantonS	BL Cornmeal	5	3	5929.922
CantonS	BL Cornmeal	5	3	5353.666
CantonS	BL Cornmeal	5	3	5316.658
CantonS	HY	5	3	6019.657
CantonS	HY	5	3	5644.996
CantonS	HY	5	3	6079.339
CantonS	HY	5	3	5938.258
CantonS	HY	5	3	5721.503
CantonS	HY	5	3	5035.322
CantonS	HY	5	3	5916.071
CantonS	HY	5	3	5254.039
CantonS	HY	5	3	6751.979
CantonS	HY	5	3	4617.729
CantonS	HY	5	3	5267.491
CantonS	HY	5	3	4788.844
CantonS	HS	5	3	4642.033
CantonS	HS	5	3	4946.549
CantonS	HS	5	3	2241.902
CantonS	HS	5	3	4671.177
CantonS	HS	5	3	4035.892
CantonS	HS	5	3	5287.408
CantonS	HS	5	3	4796.308
CantonS	HS	5	3	4320.169
CantonS	HS	5	3	4813.786
CantonS	HS	5	3	5330.393
CantonS	HY	5	1	5112.821
CantonS	HY	5	1	5734.561
CantonS	HY	5	1	4576.235
CantonS	HY	5	1	4801.736
CantonS	HY	5	1	6008.573
CantonS	HY	5	1	5267.357
CantonS	HY	5	1	6508.66
CantonS	HY	5	1	6168.543
CantonS	HY	5	1	4718.658
CantonS	HY	5	1	4894.192
CantonS	BL Molasses	5	1	4902.339
CantonS	BL Molasses	5	1	5833.621
CantonS	BL Molasses	5	1	6820.47
CantonS	BL Molasses	5	1	6467.638
CantonS	BL Molasses	5	1	6263.293
CantonS	BL Molasses	5	1	6253.825
CantonS	BL Molasses	5	1	5607.599
CantonS	BL Molasses	5	1	5683.076
CantonS	BL Molasses	5	1	4703.872
CantonS	BL Molasses	5	1	5795.608
CantonS	HS	5	1	4898.77
CantonS	HS	5	1	3658.57
CantonS	HS	5	1	3544.992
CantonS	HS	5	1	4322.46
CantonS	HS	5	1	5172.299
CantonS	HS	5	1	4717.457
CantonS	HS	5	1	4547.59
CantonS	HS	5	1	4710.316
CantonS	HS	5	1	4800.07
CantonS	HS	5	1	3074.108
CantonS	HS	5	1	4236.25
CantonS	BL Cornmeal	5	1	5828.685
CantonS	BL Cornmeal	5	1	4785.406
CantonS	BL Cornmeal	5	1	4679.462
CantonS	BL Cornmeal	5	1	5479.431
CantonS	BL Cornmeal	5	1	4132.337
CantonS	BL Cornmeal	5	1	5073.648
CantonS	BL Cornmeal	5	1	5347.551
CantonS	BL Cornmeal	5	1	5357.1
CantonS	BL Cornmeal	5	1	4690.327
