# Supplementary material for: Multiscale analysis reveals that diet-dependent midgut plasticity emerges from alterations in both stem cell niche coupling and enterocyte size
Source: eLife. 2021 Sep 23;10:e64125. doi: 10.7554/eLife.64125 (PMC8528489; doi:10.7554/eLife.64125)
Supplement: Figure 1—figure supplement 1—source data 3. [file elife-64125-fig1-figsupp1-data3.csv]

Diet	Treatment	Repeat	Total.L
HS	Mated females	1	3940.254
HS	Mated females	1	6238.4
HS	Mated females	1	4723.917
HS	Mated females	1	4785.338
HS	Mated females	1	4321.366
HS	Mated females	1	6182.542
HS	Mated females	1	3541.698
HS	Un-mated females	1	3614.178
HS	Un-mated females	1	3870.632
HS	Un-mated females	1	4319.972
HS	Un-mated females	1	4794.296
HS	Un-mated females	1	4443.023
HS	Un-mated females	1	2083.316
HS	Un-mated females	1	4308.3
HS	Un-mated females	1	2787.316
HS	Un-mated females	1	4634.637
HS	Un-mated females	1	4858.06
HS	Un-mated females	1	4805.422
HS	Males	1	3714.861
HS	Males	1	3459.498
HS	Males	1	3498.356
HS	Males	1	3408.695
HS	Males	1	3866.42
HS	Males	1	3779.8
HS	Males	1	4262.645
HS	Males	1	4179.57
HY	Mated females	1	5482.251
HY	Mated females	1	5795.102
HY	Mated females	1	6126.487
HY	Mated females	1	4936.355
HY	Mated females	1	6241.663
HY	Mated females	1	3991.811
HY	Un-mated females	1	4666.938
HY	Un-mated females	1	4515.944
HY	Un-mated females	1	4026.868
HY	Un-mated females	1	2229.456
HY	Un-mated females	1	3793.267
HY	Males	1	3351.436
HY	Males	1	3118.51
HY	Males	1	3297.387
HY	Males	1	3524.524
HY	Males	1	2938.087
HY	Males	1	3709.245
HY	Males	1	3588.276
HY	Mated females	2	4887.415
HY	Mated females	2	4830.434
HY	Mated females	2	5221.306
HY	Mated females	2	5416.158
HY	Mated females	2	4261.963
HY	Mated females	2	5691.844
HY	Mated females	2	5495.759
HY	Mated females	2	5058.85
HY	Mated females	2	3602.926
HY	Un-mated females	2	3429.558
HY	Un-mated females	2	4705.783
HY	Un-mated females	2	3459.47
HY	Un-mated females	2	3760.09
HY	Un-mated females	2	5014.936
HY	Un-mated females	2	4797.83
HY	Un-mated females	2	4744.795
HY	Un-mated females	2	4716.675
HY	Males	2	3005.455
HY	Males	2	3604.23
HY	Males	2	4007.924
HY	Males	2	3123.1
HY	Males	2	3445.305
HY	Males	2	2943.397
HY	Males	2	3082.185
HY	Males	2	3138.705
HS	Mated females	2	3496.613
HS	Mated females	2	4561.551
HS	Mated females	2	3533.412
HS	Mated females	2	3786.645
HS	Mated females	2	4296.153
HS	Mated females	2	3871.872
HS	Mated females	2	4027.919
HS	Mated females	2	5335.074
HS	Mated females	2	3792.462
HS	Males	2	3054.853
HS	Males	2	3030.134
HS	Males	2	3320.3
HS	Males	2	2942.267
HS	Males	2	3660.549
HS	Males	2	3022.096
HS	Mated females	3	4214.537
HS	Mated females	3	4564.827
HS	Mated females	3	3989.315
HS	Mated females	3	5231.467
HS	Mated females	3	4301.626
HS	Mated females	3	3935.467
HS	Mated females	3	4634.621
HS	Mated females	3	3908.385
HS	Mated females	3	3991.727
HS	Mated females	3	3905.27
HS	Un-mated females	3	3471.903
HS	Un-mated females	3	3754.719
HS	Un-mated females	3	3439.944
HS	Un-mated females	3	3640.859
HS	Un-mated females	3	4620.449
HS	Un-mated females	3	5319.19
HS	Un-mated females	3	4968.685
HS	Males	3	3919.433
HS	Males	3	4301.063
HS	Males	3	3323.594
HS	Males	3	3736.596
HS	Males	3	3666.783
HS	Males	3	3856.487
HS	Males	3	3622.164
HS	Males	3	3452.34
HS	Males	3	3226.35
HS	Males	3	3498.677
HS	Un-mated females	2	4489.999
HS	Un-mated females	2	4114.043
HS	Un-mated females	2	3089.297
HS	Un-mated females	2	3466.816
HS	Un-mated females	2	2634.703
HS	Un-mated females	2	2897.163
HS	Un-mated females	2	4348.391
HS	Un-mated females	2	4835.32
HY	Mated females	3	5664.44
HY	Mated females	3	6504.343
HY	Mated females	3	5716.34
HY	Mated females	3	6424.885
HY	Mated females	3	6317.74
HY	Mated females	3	6351.022
HY	Mated females	3	4720.648
HY	Mated females	3	6144.276
HY	Mated females	3	5383.369
HY	Mated females	3	6167.177
HY	Un-mated females	3	4450.545
HY	Un-mated females	3	4216.205
HY	Un-mated females	3	5004.147
HY	Un-mated females	3	3238.42
HY	Un-mated females	3	4863.755
HY	Un-mated females	3	5086.046
HY	Un-mated females	3	5568.795
HY	Un-mated females	3	3933.622
HY	Males	3	3860.237
HY	Males	3	3501.937
HY	Males	3	4070.919
HY	Males	3	3672.158
HY	Males	3	3810.365
HY	Males	3	3705.43
HY	Males	3	3737.713
HY	Males	3	3881.739
HY	Males	3	3622.846
