# Supplementary material for: Multiscale analysis reveals that diet-dependent midgut plasticity emerges from alterations in both stem cell niche coupling and enterocyte size
Source: eLife. 2021 Sep 23;10:e64125. doi: 10.7554/eLife.64125 (PMC8528489; doi:10.7554/eLife.64125)
Supplement: Figure 1—figure supplement 1—source data 4. [file elife-64125-fig1-figsupp1-data4.csv]

Line	Repeat	Food	Absorbance
CantonS	1	HS	0.185
CantonS	1	HS	0.463
CantonS	1	HS	0.412
CantonS	1	HS	0.303
CantonS	1	HS	0.415
CantonS	2	HS	0.139
CantonS	2	HS	0.44
CantonS	2	HS	0.542
CantonS	2	HS	0.542
CantonS	2	HS	0.547
CantonS	3	HS	0.229
CantonS	3	HS	0.507
CantonS	3	HS	0.456
CantonS	3	HS	0.42
CantonS	3	HS	0.463
CantonS	1	HY	0.082
CantonS	1	HY	0.127
CantonS	1	HY	0.128
CantonS	1	HY	0.142
CantonS	1	HY	0.201
CantonS	2	HY	0.05
CantonS	2	HY	0.122
CantonS	2	HY	0.195
CantonS	2	HY	0.165
CantonS	2	HY	0.205
CantonS	3	HY	0.076
CantonS	3	HY	0.135
CantonS	3	HY	0.186
CantonS	3	HY	0.204
CantonS	3	HY	0.2
