# Supplementary material for: Multiscale analysis reveals that diet-dependent midgut plasticity emerges from alterations in both stem cell niche coupling and enterocyte size
Source: eLife. 2021 Sep 23;10:e64125. doi: 10.7554/eLife.64125 (PMC8528489; doi:10.7554/eLife.64125)
Supplement: Figure 1—figure supplement 1—source data 5. [file elife-64125-fig1-figsupp1-data5.csv]

Line	Treatment	Diet	Day	Repeat	Total.L
CantonS	CR	HS	7	1	4297.359
CantonS	CR	HS	7	1	4011.437
CantonS	CR	HS	7	1	3993.044
CantonS	CR	HS	7	1	4761.948
CantonS	CR	HY	7	1	4677.976
CantonS	CR	HY	7	1	5625.968
CantonS	CR	HY	7	1	4904.226
CantonS	CR	HY	7	1	5379.696
CantonS	GF	HS	7	1	4204.69
CantonS	GF	HS	7	1	4264.354
CantonS	GF	HS	7	1	4417.249
CantonS	GF	HS	7	1	3818.145
CantonS	GF	HS	7	1	4087.13
CantonS	GF	HS	7	1	3653.49
CantonS	GF	HS	7	1	5144.086
CantonS	GF	HS	7	1	4451.976
CantonS	GF	HS	7	1	4247.199
CantonS	GF	HS	7	1	4287.551
CantonS	GF	HY	7	1	5504.47
CantonS	GF	HY	7	1	5227.246
CantonS	GF	HY	7	1	5298.839
CantonS	GF	HY	7	1	5268.683
CantonS	GF	HY	7	1	6081.293
CantonS	GF	HY	7	1	5223.99
CantonS	GF	HY	7	1	5842.111
CantonS	GF	HY	7	1	5613.215
CantonS	GF	HY	7	1	5911.567
CantonS	CR	HY	14	1	4554.208
CantonS	CR	HY	14	1	4693.941
CantonS	CR	HY	14	1	5899.443
CantonS	CR	HY	14	1	5280.531
CantonS	CR	HY	14	1	5504.328
CantonS	CR	HY	14	1	5852.548
CantonS	CR	HY	14	1	4851.414
CantonS	CR	HY	14	1	5309.554
CantonS	CR	HY	14	1	5067.388
CantonS	CR	HS	14	1	3440.249
CantonS	CR	HS	14	1	3099.944
CantonS	CR	HS	14	1	3063.048
CantonS	CR	HS	14	1	4306.295
CantonS	CR	HS	14	1	3437.804
CantonS	GF	HY	14	1	5111.15
CantonS	GF	HY	14	1	5112.786
CantonS	GF	HY	14	1	5366.188
CantonS	GF	HY	14	1	5045.432
CantonS	GF	HY	14	1	5821.498
CantonS	GF	HY	14	1	5343.006
CantonS	GF	HY	14	1	4347.686
CantonS	GF	HY	14	1	4691.372
CantonS	GF	HY	14	1	3973.961
CantonS	GF	HY	14	1	4910.819
CantonS	GF	HS	14	1	3558.665
CantonS	GF	HS	14	1	4306.444
CantonS	GF	HS	14	1	4008.104
CantonS	GF	HS	14	1	4199.951
CantonS	GF	HS	14	1	4085.495
CantonS	GF	HS	14	1	3073.667
CantonS	GF	HS	14	1	2934.203
CantonS	GF	HS	14	1	3553.773
CantonS	GF	HS	14	1	3900.946
CantonS	GF	HS	7	2	4132.369
CantonS	GF	HS	7	2	4363.401
CantonS	GF	HS	7	2	4180.228
CantonS	GF	HS	7	2	4783.56
CantonS	GF	HS	7	2	4628.705
CantonS	GF	HS	7	2	4248.573
CantonS	GF	HS	7	2	4337.108
CantonS	GF	HS	7	2	4476.309
CantonS	GF	HS	7	2	4104.904
CantonS	GF	HS	7	2	4338.849
CantonS	GF	HS	7	2	4906.825
CantonS	GF	HY	7	2	5789.03
CantonS	GF	HY	7	2	5196.455
CantonS	GF	HY	7	2	5073.607
CantonS	GF	HY	7	2	6856.482
CantonS	GF	HY	7	2	6306.506
CantonS	GF	HY	7	2	5480.454
CantonS	GF	HY	7	2	6397.187
CantonS	GF	HY	7	2	5396.29
CantonS	GF	HY	7	2	4910.452
CantonS	CR	HS	7	2	3703.255
CantonS	CR	HS	7	2	3647.829
CantonS	CR	HS	7	2	3972.812
CantonS	CR	HS	7	2	3854.672
CantonS	CR	HS	7	2	4972.45
CantonS	CR	HS	7	2	3072.31
CantonS	CR	HY	7	2	5494.959
CantonS	CR	HY	7	2	5124.8
CantonS	CR	HY	7	2	5549.784
CantonS	CR	HY	7	2	5033.505
CantonS	CR	HY	7	2	5377.706
CantonS	CR	HY	7	2	5148.128
CantonS	CR	HY	7	2	5396.914
CantonS	CR	HY	7	2	5348.569
CantonS	CR	HY	7	2	5584.959
CantonS	GF	HY	7	3	4897.286
CantonS	GF	HY	7	3	6197.282
CantonS	GF	HY	7	3	6196.289
CantonS	GF	HY	7	3	6019.698
CantonS	GF	HY	7	3	5525.335
CantonS	GF	HY	7	3	5860.157
CantonS	GF	HY	7	3	6078.517
CantonS	GF	HY	7	3	5281.292
CantonS	GF	HY	7	3	5470.184
CantonS	GF	HS	7	3	4555.13
CantonS	GF	HS	7	3	4664.071
CantonS	GF	HS	7	3	3855.119
CantonS	GF	HS	7	3	4411.561
CantonS	GF	HS	7	3	3925.135
CantonS	GF	HS	7	3	4035.73
CantonS	GF	HS	7	3	4471.436
CantonS	GF	HS	7	3	3841.309
CantonS	GF	HS	7	3	3958.927
CantonS	CR	HY	7	3	3985.208
CantonS	CR	HY	7	3	5191.462
CantonS	CR	HY	7	3	4629.099
CantonS	CR	HY	7	3	5324.601
CantonS	CR	HY	7	3	5759.987
CantonS	CR	HY	7	3	5591.058
CantonS	CR	HY	7	3	4514.514
CantonS	CR	HY	7	3	5874.704
CantonS	CR	HY	7	3	4644.803
CantonS	CR	HS	7	3	3624.477
CantonS	CR	HS	7	3	3708.404
CantonS	CR	HS	7	3	3288.015
CantonS	CR	HS	7	3	2967.775
CantonS	CR	HS	7	3	4086.306
CantonS	CR	HS	7	3	4428.415
CantonS	CR	HS	7	3	4087.754
CantonS	CR	HS	7	3	3631.562
CantonS	CR	HY	14	2	6337.297
CantonS	CR	HY	14	2	6296.171
CantonS	CR	HY	14	2	5112.017
CantonS	CR	HY	14	2	6252.866
CantonS	CR	HY	14	2	6541.56
CantonS	CR	HY	14	2	5830.528
CantonS	CR	HY	14	2	4661.072
CantonS	CR	HY	14	2	5808.135
CantonS	CR	HS	14	2	3744.21
CantonS	CR	HS	14	2	3048.957
CantonS	CR	HS	14	2	3651.834
CantonS	CR	HS	14	2	3555.881
CantonS	CR	HS	14	2	4134.894
CantonS	CR	HS	14	2	3780.216
CantonS	CR	HS	14	2	2851.255
CantonS	CR	HS	14	2	3701.81
CantonS	CR	HS	14	2	4110.105
CantonS	CR	HS	14	2	4658.917
CantonS	CR	HS	14	2	2929.918
CantonS	CR	HY	14	3	5412.189
CantonS	CR	HY	14	3	6187.206
CantonS	CR	HY	14	3	6476.177
CantonS	CR	HY	14	3	6378.667
CantonS	CR	HY	14	3	5122.095
CantonS	CR	HY	14	3	5308.276
CantonS	CR	HY	14	3	5624.537
CantonS	CR	HY	14	3	6253.556
CantonS	CR	HS	14	3	4368.186
CantonS	CR	HS	14	3	3946.985
CantonS	CR	HS	14	3	3785.322
CantonS	CR	HS	14	3	4469.446
CantonS	CR	HS	14	3	3749.259
CantonS	CR	HS	14	3	3826.458
CantonS	CR	HS	14	3	3137.232
CantonS	GF	HY	14	2	5796.475
CantonS	GF	HY	14	2	4620.344
CantonS	GF	HY	14	2	4922.126
CantonS	GF	HY	14	2	5944.423
CantonS	GF	HY	14	2	4612.033
CantonS	GF	HY	14	2	4915.395
CantonS	GF	HY	14	2	5129.31
CantonS	GF	HY	14	2	5560.271
CantonS	GF	HY	14	2	6018.5
CantonS	GF	HY	14	2	4770.772
CantonS	GF	HS	14	2	3941.736
CantonS	GF	HS	14	2	4139.523
CantonS	GF	HS	14	2	3646.559
CantonS	GF	HS	14	2	3246.143
CantonS	GF	HS	14	2	4297.729
CantonS	GF	HS	14	2	3788.998
CantonS	GF	HS	14	2	4454.614
CantonS	GF	HS	14	2	3895.938
CantonS	GF	HS	14	2	3668.581
CantonS	GF	HS	14	2	3222.133
CantonS	GF	HY	14	3	6395.994
CantonS	GF	HY	14	3	7118.765
CantonS	GF	HY	14	3	4825.933
CantonS	GF	HY	14	3	7067.458
CantonS	GF	HY	14	3	5313.171
CantonS	GF	HS	14	3	3944.153
CantonS	GF	HS	14	3	4519.227
CantonS	GF	HS	14	3	4318.045
CantonS	GF	HS	14	3	3664.117
CantonS	GF	HS	14	3	2849.781
