# Supplementary material for: Multiscale analysis reveals that diet-dependent midgut plasticity emerges from alterations in both stem cell niche coupling and enterocyte size
Source: eLife. 2021 Sep 23;10:e64125. doi: 10.7554/eLife.64125 (PMC8528489; doi:10.7554/eLife.64125)
Supplement: Figure 1—figure supplement 3—source data 1. [file elife-64125-fig1-figsupp3-data1.csv]

	SNP_version6	Pvalue	IMPACT	SYMBOL	Consequence
1	2R:24390831	3.823569e-08	MODIFIER	CR44813	non_coding_transcript_exon_variant,non_coding_transcript_variant
2	2R:24390831	3.823569e-08	MODIFIER	mAChR-A	upstream_gene_variant
3	2R:24390831	3.823569e-08	MODIFIER	slik	downstream_gene_variant
4	2R:20837183	4.633412e-07	MODIFIER	CR44667	upstream_gene_variant
5	2R:20837183	4.633412e-07	MODIFIER	insc	upstream_gene_variant
6	2R:20837183	4.633412e-07	MODIFIER	sktl	upstream_gene_variant
7	2L:3662934	6.534946e-07	MODIFIER	CG34340	5_prime_UTR_variant
8	3L:16695314	8.037597e-07	MODIFIER	CG43954	intron_variant
9	3L:16695314	8.037597e-07	MODIFIER	CR45179	intron_variant,non_coding_transcript_variant
10	3L:16695314	8.037597e-07	MODIFIER	Lasp	intron_variant
11	2R:20836378	9.054204e-07	MODIFIER	CR44667	upstream_gene_variant
12	2R:20836378	9.054204e-07	MODIFIER	insc	upstream_gene_variant
13	2R:20836378	9.054204e-07	MODIFIER	sktl	upstream_gene_variant
14	2R:20837133	1.62134e-06	MODIFIER	CR44667	upstream_gene_variant
15	2R:20837133	1.62134e-06	MODIFIER	insc	upstream_gene_variant
16	2R:20837133	1.62134e-06	MODIFIER	sktl	upstream_gene_variant
17	2L:9581587	1.758768e-06	LOW	gcm	synonymous_variant
18	2L:9581587	1.758768e-06	MODIFIER	CG31709	upstream_gene_variant
19	2L:9581587	1.758768e-06	MODIFIER	CR43621	downstream_gene_variant
20	2L:9581587	1.758768e-06	MODIFIER	Mtpalpha	upstream_gene_variant
21	2R:20835825	1.874133e-06	MODIFIER	CR44667	upstream_gene_variant
22	2R:20835825	1.874133e-06	MODIFIER	insc	5_prime_UTR_variant
23	2R:20835825	1.874133e-06	MODIFIER	sktl	5_prime_UTR_variant
24	2R:20835825	1.874133e-06	MODIFIER	sktl	upstream_gene_variant
25	2R:20837467	1.896714e-06	MODIFIER	CR44667	upstream_gene_variant
26	2R:20837467	1.896714e-06	MODIFIER	insc	upstream_gene_variant
27	2R:20837467	1.896714e-06	MODIFIER	sktl	upstream_gene_variant
28	2L:5234633	2.044771e-06	MODIFIER	tkv	intron_variant
29	2L:5234636	2.277434e-06	MODIFIER	tkv	intron_variant
30	2L:15775499	2.386993e-06	MODIFIER	CG31826	upstream_gene_variant
31	2L:15775499	2.386993e-06	MODIFIER	CG43760	downstream_gene_variant
32	2L:15775499	2.386993e-06	MODIFIER	Ku80	upstream_gene_variant
33	2L:15775500	2.386993e-06	MODIFIER	CG31826	upstream_gene_variant
34	2L:15775500	2.386993e-06	MODIFIER	CG43760	downstream_gene_variant
35	2L:15775500	2.386993e-06	MODIFIER	Ku80	upstream_gene_variant
36	2L:1629847	2.639659e-06	MODIFIER	CR44603	upstream_gene_variant
37	3R:20406567	2.794303e-06	MODIFIER	CG10881	upstream_gene_variant
38	3R:20406567	2.794303e-06	MODIFIER	CG4335	downstream_gene_variant
39	3R:20406567	2.794303e-06	MODIFIER	Gfrl	intron_variant
40	2R:20837324	3.030834e-06	MODIFIER	CR44667	upstream_gene_variant
41	2R:20837324	3.030834e-06	MODIFIER	insc	upstream_gene_variant
42	2R:20837324	3.030834e-06	MODIFIER	sktl	upstream_gene_variant
43	2L:5234643	3.155918e-06	MODIFIER	tkv	intron_variant
44	3R:20406584	3.300644e-06	MODIFIER	CG10881	upstream_gene_variant
45	3R:20406584	3.300644e-06	MODIFIER	CG4335	downstream_gene_variant
46	3R:20406584	3.300644e-06	MODIFIER	Gfrl	intron_variant
47	3R:31341443	3.321641e-06	MODIFIER	CG34347	intron_variant
48	3R:31341443	3.321641e-06	MODIFIER	CR46118	upstream_gene_variant
49	3R:31343927	3.321641e-06	MODIFIER	CG34347	intron_variant
50	3R:31343927	3.321641e-06	MODIFIER	CR46118	upstream_gene_variant
51	2R:24387198	3.326182e-06	MODIFIER	CR44813	upstream_gene_variant
52	2R:24387198	3.326182e-06	MODIFIER	mAChR-A	intron_variant
53	2R:24387198	3.326182e-06	MODIFIER	slik	downstream_gene_variant
54	3R:20406577	3.328058e-06	MODIFIER	CG10881	upstream_gene_variant
55	3R:20406577	3.328058e-06	MODIFIER	CG4335	downstream_gene_variant
56	3R:20406577	3.328058e-06	MODIFIER	Gfrl	intron_variant
57	3R:8536714	3.84749e-06	MODIFIER	-	intergenic_variant
58	2R:24424999	4.4367e-06	LOW	CG42383	synonymous_variant
59	2R:24424999	4.4367e-06	MODIFIER	CG15873	downstream_gene_variant
60	2R:24424999	4.4367e-06	MODIFIER	prom	intron_variant
61	X:14664145	4.764469e-06	MODIFIER	-	intergenic_variant
62	2L:14677161	5.034656e-06	MODIFIER	osp	intron_variant
63	2L:12248213	5.067619e-06	MODIFIER	aret	intron_variant
64	X:8529917	5.205342e-06	MODIFIER	Nrg	intron_variant
65	X:8529917	5.205342e-06	MODIFIER	PIP82	upstream_gene_variant
66	2R:24414419	5.429364e-06	LOW	CG45068	splice_region_variant,intron_variant
67	2R:24414419	5.429364e-06	LOW	CG45069	splice_region_variant,intron_variant
68	2R:24414419	5.429364e-06	MODIFIER	CG45069	upstream_gene_variant
69	2R:24414419	5.429364e-06	MODIFIER	prom	downstream_gene_variant
70	2R:24414419	5.429364e-06	MODIFIER	SerT	upstream_gene_variant
71	2R:14607814	5.532081e-06	MODERATE	Su(var)2-HP2	missense_variant
72	2R:14607814	5.532081e-06	MODIFIER	CG12868	upstream_gene_variant
73	2R:14607814	5.532081e-06	MODIFIER	CG33468	upstream_gene_variant
74	2R:14607814	5.532081e-06	MODIFIER	CG33469	upstream_gene_variant
75	2R:14607814	5.532081e-06	MODIFIER	scaRNA:PsiU5-44	upstream_gene_variant
76	2R:14607814	5.532081e-06	MODIFIER	tra2	upstream_gene_variant
77	2R:18293744	6.185736e-06	MODIFIER	CG14502	5_prime_UTR_variant
78	2R:18293744	6.185736e-06	MODIFIER	CG14502	intron_variant
79	2R:18293744	6.185736e-06	MODIFIER	CG14502	upstream_gene_variant
80	2R:18293744	6.185736e-06	MODIFIER	CG18536	upstream_gene_variant
81	2R:18293744	6.185736e-06	MODIFIER	CG18537	upstream_gene_variant
82	2R:18293744	6.185736e-06	MODIFIER	CG18538	upstream_gene_variant
83	2R:18293744	6.185736e-06	MODIFIER	CG18539	upstream_gene_variant
84	2R:18293744	6.185736e-06	MODIFIER	sbb	intron_variant
85	2R:18293744	6.185736e-06	MODIFIER	sbb	upstream_gene_variant
86	2R:24417286	6.304169e-06	LOW	prom	synonymous_variant
87	2R:24417286	6.304169e-06	MODIFIER	CG45068	downstream_gene_variant
88	2R:24417286	6.304169e-06	MODIFIER	CG45069	downstream_gene_variant
89	2R:24417286	6.304169e-06	MODIFIER	prom	downstream_gene_variant
90	3R:31346337	6.326694e-06	MODIFIER	CG34347	intron_variant
91	3R:31346337	6.326694e-06	MODIFIER	CR46118	downstream_gene_variant
92	2L:1335206	6.524132e-06	MODIFIER	CG5440	3_prime_UTR_variant
93	2L:1335206	6.524132e-06	MODIFIER	CG5440	downstream_gene_variant
94	2L:5234639	6.526839e-06	MODIFIER	tkv	intron_variant
95	3R:20406562	6.915508e-06	MODIFIER	CG10881	upstream_gene_variant
96	3R:20406562	6.915508e-06	MODIFIER	CG4335	downstream_gene_variant
97	3R:20406562	6.915508e-06	MODIFIER	Gfrl	intron_variant
98	2L:2730196	7.137148e-06	MODIFIER	CG31689	5_prime_UTR_variant
99	2L:2730196	7.137148e-06	MODIFIER	CG31689	intron_variant
100	2L:2730196	7.137148e-06	MODIFIER	CG31689	upstream_gene_variant
101	2R:21134070	7.298606e-06	MODIFIER	Magi	intron_variant
102	2R:21134070	7.298606e-06	MODIFIER	mago	downstream_gene_variant
103	3R:16834014	7.431434e-06	MODIFIER	abd-A	upstream_gene_variant
104	3R:16834014	7.431434e-06	MODIFIER	iab-8	downstream_gene_variant
105	3R:16834014	7.431434e-06	MODIFIER	iab-8	intron_variant,non_coding_transcript_variant
106	2L:4678664	8.335386e-06	MODIFIER	Bsg25A	downstream_gene_variant
107	2L:4678664	8.335386e-06	MODIFIER	CG11929	upstream_gene_variant
108	2R:21134534	8.488e-06	MODIFIER	Magi	intron_variant
109	2R:21134534	8.488e-06	MODIFIER	mago	downstream_gene_variant
110	2L:17770166	8.501842e-06	MODIFIER	CadN	intron_variant
111	2L:3609360	9.033543e-06	MODIFIER	odd	upstream_gene_variant
112	2R:22099208	9.062246e-06	MODIFIER	CG11073	5_prime_UTR_variant
113	2R:22099208	9.062246e-06	MODIFIER	CG6613	upstream_gene_variant
114	2L:15775653	9.856125e-06	MODIFIER	CG31826	upstream_gene_variant
115	2L:15775653	9.856125e-06	MODIFIER	CG43760	downstream_gene_variant
116	2L:15775653	9.856125e-06	MODIFIER	Ku80	upstream_gene_variant
