# Supplementary material for: Multiscale analysis reveals that diet-dependent midgut plasticity emerges from alterations in both stem cell niche coupling and enterocyte size
Source: eLife. 2021 Sep 23;10:e64125. doi: 10.7554/eLife.64125 (PMC8528489; doi:10.7554/eLife.64125)
Supplement: Figure 1—source data 1. [file elife-64125-fig1-data1.csv]

Diet	Component	Calories contributed
HS	Proteins	26.139915
HS	Carbohydrates	661.55328
HS	Lipids	8.55096
HY	Proteins	233.60481
HY	Carbohydrates	385.12692
HY	Lipids	76.41744
