# Supplementary material for: Multiscale analysis reveals that diet-dependent midgut plasticity emerges from alterations in both stem cell niche coupling and enterocyte size
Source: eLife. 2021 Sep 23;10:e64125. doi: 10.7554/eLife.64125 (PMC8528489; doi:10.7554/eLife.64125)
Supplement: Figure 1—source data 2. [file elife-64125-fig1-data2.csv]

DGRP_ID	DGRP_number	additional_code	alias	diet	block	code	image	Gut_Number	anteriorLength	middleLength	posteriorLength	anteriorwidth	posteriorwidth	totalLength
DGRP-31	31	i	31i	x	a	a1		1	2339.543	518.068	2400.184	147.017	192.159	5257.795
DGRP-31	31	i	31i	x	a	a1		2	2066.14	472.607	2369.846	211.526	221.646	4908.593
DGRP-31	31	i	31i	x	a	a1		3	2236.803	464.575	2518.889	173.416	231.804	5220.267
DGRP-31	31	i	31i	x	a	a1		4				148.562	186.417
DGRP-31	31	i	31i	x	a	a1		5				164.927	241.246
DGRP-31	31	i	31i	y	a	a1		1	2610.313	757.54	2945.525	308.8	339.621	6313.378
DGRP-31	31	i	31i	y	a	a1		2	2051.25	475.817	2120.363	238.626	362.592	4647.43
DGRP-45	45	w	45w	y	a	a1		1	2614.134	607.907	3383.527	218.646	194.759	6605.568
DGRP-45	45	w	45w	y	a	a1		2	2547.311	465.096	2588.825	202.484	213.33	5601.232
DGRP-45	45	w	45w	y	a	a1		3	3016.411	469.623	2821.593	219.715	205.193	6307.627
DGRP-45	45	w	45w	y	a	a1		4	2809.943	380.122	2729.468	199.13	189.71	5919.533
DGRP-100	100	k	100k	x	a	a1		1	2525.32	289.763	2004.481	178.5	267.003	4819.564
DGRP-100	100	k	100k	x	a	a1		2	2605.519	395.56	1978.087	172.942	206.421	4979.166
DGRP-100	100	k	100k	x	a	a1		3	2367.37	406.924	1598.551	172.618	239.401	4372.845
DGRP-100	100	k	100k	x	a	a1		4	1950.139	328.577	2186.142	161.258	214.086	4464.858
DGRP-100	100	k	100k	x	a	a1		5	2250.746	462.205	1931.897	190.8	213.384	4644.848
DGRP-100	100	k	100k	y	a	a1		1	2682.76	554.322	2139.026	303.808	312.069	5376.108
DGRP-100	100	k	100k	y	a	a1		2	2342.894	478.491	2678.985	257.539	317.217	5500.37
DGRP-100	100	k	100k	y	a	a1		3	2858.156	379.593	2276.754	206.869	317.673	5514.503
DGRP-100	100	k	100k	y	a	a1		4	2668.733	453.879	2837.427	250.775	260.028	5960.039
DGRP-100	100	k	100k	y	a	a1		5	2216.762	449.512	2098.804	240.749	258.709	4765.078
DGRP-161	161	k	161k	x	a	a1		1	2981.97	351.206	2029.623	121.015	203.165	5362.799
DGRP-161	161	k	161k	x	a	a1		2	2734.448	492.392	2074.901	163.8	179.795	5301.741
DGRP-161	161	k	161k	x	a	a1		3	2121.014	460.768	1578.32	166.201	210.561	4160.102
DGRP-161	161	k	161k	y	a	a1		1	2690.994	512.45	2095.476	340.79	314.357	5298.92
DGRP-161	161	k	161k	y	a	a1		2	2767.458	663.967	2949.098	279.812	288.318	6380.523
DGRP-161	161	k	161k	y	a	a1		3	2979.134	726.071	2785.982	399.891	293.957	6491.187
DGRP-161	161	k	161k	y	a	a1		4	2699.768	484.658		288.366	304.761
DGRP-195	195	p	195p	x	a	a1		1	2920.81	614.769	1844.546	156.029	232.65	5380.125
DGRP-195	195	p	195p	x	a	a1		2	2794.275	416.121	2076.128	155.679	209.571	5286.524
DGRP-195	195	p	195p	x	a	a1		3	2801.564	391.652	2061.622	155.427	161.128	5254.838
DGRP-195	195	p	195p	y	a	a1		1	3093.014	458.373	2483.203	191.501	299.11	6034.59
DGRP-195	195	p	195p	y	a	a1		2	2628.362	414.717	2725.853	242.51	278.887	5768.932
DGRP-195	195	p	195p	y	a	a1		3	2700.628	484.285	2669.185	238.831	261.247	5854.098
DGRP-195	195	p	195p	y	a	a1		4	2581.925	446.957	3105.603	250.122	280.897	6134.485
DGRP-208	208	l	208l	x	a	a1		1	2031.568	576.793	2480.218	176.743	195.954	5088.579
DGRP-208	208	l	208l	x	a	a1		2	1844.313	251.438	1629.216	149.658	213.044	3724.967
DGRP-208	208	l	208l	x	a	a1		3	2560.494	372.365	2343.684	190.878	301.974	5276.543
DGRP-208	208	l	208l	x	a	a1		4	2683.111	460.476	1819.733	139.144	196.475	4963.32
DGRP-208	208	l	208l	y	a	a1		1	2009.476	438.866	2232.217	203.448	290.378	4680.559
DGRP-208	208	l	208l	y	a	a1		2	2230.38	428.942	2503.569	290.556	356.518	5162.891
DGRP-208	208	l	208l	y	a	a1		3	2283.436	571.409	2499.555	285.852	321.041	5354.4
DGRP-208	208	l	208l	y	a	a1		4	2459.216	488.606	2855.688	305.786	323.901	5803.51
DGRP-208	208	l	208l	y	a	a1		5	2407.594	345.394	2139.53	172.967	264.552	4892.518
DGRP-228	228	t	228t	x	a	a1		1	2565.891	293.442	1612.559	70.519	100.183	4471.892
DGRP-228	228	t	228t	x	a	a1		2				115.389	99.14	5801.197
DGRP-228	228	t	228t	x	a	a1		3	2422.932	349.886	2281.103	96.052	127.59	5053.921
DGRP-228	228	t	228t	y	a	a1		1	2702.15	407.657	2371.572	156.694	181.326	5481.379
DGRP-228	228	t	228t	y	a	a1		2	2490.129	361.93	2616.036	183.898	180.878	5468.095
DGRP-228	228	t	228t	y	a	a1		3	2932.437	642.957	2455.658	171.556	228.087	6031.052
DGRP-229	229	j	229j	x	a	a1		1	2026.21	235.191	1485.196	103.09	116.554	3746.597
DGRP-229	229	j	229j	x	a	a1		2	2113.707	315.039	1482.03	106.97	122.996	3910.776
DGRP-229	229	j	229j	x	a	a1		3	1925.229	362.325	1437.938	105.25	124.452	3725.492
DGRP-229	229	j	229j	x	a	a1		4	2137.765	303.272	1666.345	99.427	94.137	4107.382
DGRP-229	229	j	229j	y	a	a1		1	2323.743	637.497	2453.341	271.262	249.215	5414.581
DGRP-229	229	j	229j	y	a	a1		2	2486.685	463.361	2643.504	227.307	233.217	5593.55
DGRP-229	229	j	229j	y	a	a1		3	1963.489	635.351	1795.768	283.47	230.805	4394.608
DGRP-229	229	j	229j	y	a	a1		4	2312.869	451.636	2180.027	233.178	225.499	4944.532
DGRP-229	229	j	229j	y	a	a1		5	2201.482	603.412	2704.865	312.196	302.6	5509.759
DGRP-235	235	x	235x	x	a	a1		1	2359.467	379.937	1669.644	165.034	227.957	4409.048
DGRP-235	235	x	235x	x	a	a1		2	1937.509	287.734	1856.039	180.935	184.191	4081.282
DGRP-235	235	x	235x	x	a	a1		3	2076.016	273.27	1436.892	144.986	170.949	3786.178
DGRP-235	235	x	235x	x	a	a1		4	2304.498	241.865	1724.112	100.8	124.071	4270.475
DGRP-235	235	x	235x	y	a	a1		1	3049.944	772.686	3004.619	346.689	326.24	6827.249
DGRP-235	235	x	235x	y	a	a1		2	2946.274	659.166	3365.645	241.575	401.649	6971.085
DGRP-235	235	x	235x	y	a	a1		3	3425.28	584.756	2619.026	209.529	284.726	6629.062
DGRP-235	235	x	235x	y	a	a1		4	2475.029	797.994	2898.039	243.386	268.109	6171.062
DGRP-235	235	x	235x	y	a	a1		5	2359.332	488.896	3083.783	184.912	233.119	5932.011
DGRP-280	280	y	280y	x	a	a1		1	2827.586	523.406	1949.048	89.25	170.9	5300.04
DGRP-280	280	y	280y	x	a	a1		2	2358.801	434.248	1910.045	156.122	181.856	4703.094
DGRP-280	280	y	280y	x	a	a1		3	2464.149	386.698	1937.648	131.231	147.978	4788.495
DGRP-280	280	y	280y	y	a	a1		1	2688.762	663.376	2750.105	255.952	349.093	6102.243
DGRP-280	280	y	280y	y	a	a1		2	2593.852	581.243	2152.625	283.507	287.347	5327.72
DGRP-280	280	y	280y	y	a	a1		3	3375.752	474.168	2540.462	216.743	310.369	6390.382
DGRP-280	280	y	280y	y	a	a1		4	3089.895	493.88	2505.158	296.575	366.806	6088.933
DGRP-306	306	k	306k	x	a	a1		1	3657.777	472.857	2835.114	114.981	161.749	6965.748
DGRP-306	306	k	306k	x	a	a1		2	2695.697	351.473	2133.728	124.158	232.582	5180.898
DGRP-306	306	k	306k	x	a	a1		3	2188.882	368.844	1735.513	139.808	155.49	4293.239
DGRP-306	306	k	306k	x	a	a1		4	2517.123	314.849	1959.35	113.069	194.232	4791.322
DGRP-306	306	k	306k	x	a	a1		5	2557.315	413.797	1974.706	121.572	155.838	4945.818
DGRP-306	306	k	306k	y	a	a1		1	3578.482	467.266	3732.382	258.047	335.644	7778.13
DGRP-306	306	k	306k	y	a	a1		2	2697.733	573.504	2644.501	311.162	269.207	5915.738
DGRP-306	306	k	306k	y	a	a1		3	2991.823	544.129	2430.503	260.275	215.844	5966.455
DGRP-306	306	k	306k	y	a	a1		4	2664.268	475.015	2504.57	239.273	291.394	5643.853
DGRP-306	306	k	306k	y	a	a1		5	2663.466	513.929	2121.041	282.511	296.906	5298.436
DGRP-309	309	h	309h	x	a	a1		1	2068.805	355.802	1531.972	149.227	166.909	3956.579
DGRP-309	309	h	309h	x	a	a1		2	1994.078	342.341	1407.517	119.751	183.241	3743.936
DGRP-309	309	h	309h	x	a	a1		3	2242.955	521.128	2062.025	182.54	212.53	4826.108
DGRP-309	309	h	309h	y	a	a1		1	2486.575	565.961	2053.065	203.087	265.916	5105.601
DGRP-309	309	h	309h	y	a	a1		2	2227.326	433.971	1869.741	213.258	284.634	4531.038
DGRP-309	309	h	309h	y	a	a1		3	2143.272	478.402	2206.338	266.957	295.994	4828.012
DGRP-313	313	q	313q	y	a	a1		1	2539.954	558.931	1803.068	275.476	266.008	4901.953
DGRP-313	313	q	313q	y	a	a1		2	2349.956	567.339	1870.85	323.104	344.058	4788.145
DGRP-313	313	q	313q	y	a	a1		3	2158.997	482.899	1916.167	288.659	386.432	4558.063
DGRP-313	313	q	313q	y	a	a1		4	2770.776	768.301	2552.091	242.681	246.127	6091.168
DGRP-315	315	r	315r	x	a	a1		1	1880.165	278.535	1352.876	135.441	198.94	3511.576
DGRP-315	315	r	315r	x	a	a1		2	2056.467	253.3	1421.798	151.283	197.339	3731.565
DGRP-315	315	r	315r	x	a	a1		3	2026.271	391.259	1650.754	127.279	204.132	4068.284
DGRP-315	315	r	315r	x	a	a1		4				172.559	222.796	3436.087
DGRP-315	315	r	315r	y	a	a1		1	2481.164	535.316	1802.283	192.192	329.823	4818.763
DGRP-315	315	r	315r	y	a	a1		2	2802.631	318.674	1980.849	229.459	265.984	5102.154
DGRP-315	315	r	315r	y	a	a1		3	2542.448	656.961	1894.455	219.348	284.719	5093.864
DGRP-315	315	r	315r	y	a	a1		4	2489.084	414.638	1703.246	230.609	250.234	4606.968
DGRP-324	324	s	324s	x	a	a1		1	2046.258	230.419	1359.763	72.054	105.25	3636.44
DGRP-324	324	s	324s	x	a	a1		2	2025.483	296.243	1143.27	87.6	87.242	3464.996
DGRP-324	324	s	324s	x	a	a1		3	1949.224	298.606	1478.224	101.4	113.8	3726.054
DGRP-324	324	s	324s	x	a	a1		4	1591.083	239.458	1268.848	91.665	98.969	3099.389
DGRP-324	324	s	324s	x	a	a1		5	1979.089	233.795	1345.345	130.235	139.305	3558.229
DGRP-324	324	s	324s	y	a	a1		1	2156.768	667.133	2527.849	169.806	199.623	5351.75
DGRP-324	324	s	324s	y	a	a1		2	2713.512	802.862	2570.831	237.376	218.046	6087.205
DGRP-324	324	s	324s	y	a	a1		3	2877.615	503.018	2024.699	185.371	202.302	5405.332
DGRP-324	324	s	324s	y	a	a1		4	2285.684	637.337	2322.898	239.189	270.074	5245.919
DGRP-324	324	s	324s	y	a	a1		5	2446.645	487.824	2311.746	300.262	284.863	5246.215
DGRP-350	350	e	350e	x	a	a1		1	2166.774	410.946	2287.483	147.054	209.335	4865.203
DGRP-350	350	e	350e	x	a	a1		2	1833.132	469.424	2000.621	116.548	148.808	4303.177
DGRP-350	350	e	350e	x	a	a1		3	2099.12	486.379	2044.243	95.884	176.005	4629.742
DGRP-350	350	e	350e	x	a	a1		4	2271.546	478.261	1997.169	121.357	202.159	4746.976
DGRP-350	350	e	350e	x	a	a1		5	2644.028	506.067	2113.062	106.1	167.168	5263.157
DGRP-350	350	e	350e	y	a	a1		1	1889.316	515.074	2169.769	190.932	211.917	4574.159
DGRP-350	350	e	350e	y	a	a1		2	2042.356	687.498	2327.22	202.734	235.985	5057.074
DGRP-350	350	e	350e	y	a	a1		3	2127.108	669.742	1897.5	193.691	186.073	4694.35
DGRP-350	350	e	350e	y	a	a1		4	2004.522	548.21	2444.088	193.618	190.055	4996.82
DGRP-350	350	e	350e	y	a	a1		5	1970.489	772.641	2183.568	198.049	202.1	4926.698
DGRP-360	360	b	360b	x	a	a1		1	2495.418	390.834	1761.436	185.58	234.732	4647.688
DGRP-360	360	b	360b	x	a	a1		2	2580.773	376.56	2295.022	141.733	246.868	5252.355
DGRP-360	360	b	360b	x	a	a1		3	2692.946	478.905	2812.656	150.501	303.294	5984.507
DGRP-360	360	b	360b	x	a	a1		4	2225.236	687.698	2016.212	119.738	172.441	4929.146
DGRP-360	360	b	360b	y	a	a1		1	2364.345	441.692	2111.644	190.053	253.82	4917.681
DGRP-360	360	b	360b	y	a	a1		2	2341.58	527.394	2463.92	235.209	299.393	5332.894
DGRP-360	360	b	360b	y	a	a1		3	2418.62	590.57	2012.642	254.149	260.123	5021.832
DGRP-360	360	b	360b	y	a	a1		4	2493.576	642.334	1902.925	203.908	276.326	5038.835
DGRP-365	365	q	365q	x	a	a1		1	3286.954	442.319	1831.464	113.642	207.006	5560.737
DGRP-365	365	q	365q	x	a	a1		2	2457.558	468.301	1755.888	92.109	207.131	4681.747
DGRP-365	365	q	365q	x	a	a1		3	2290.42	367.16	1953.836	133.808	218.691	4611.416
DGRP-365	365	q	365q	x	a	a1		4	1451.84	451.987	1417.776	128.965	172.441	3321.603
DGRP-365	365	q	365q	y	a	a1		1	2548.364	723.912	2454.424	292.551	370.999	5726.7
DGRP-365	365	q	365q	y	a	a1		2	2586.533	676.989	2868.909	232.147	315.057	6132.431
DGRP-365	365	q	365q	y	a	a1		3				247.035	415.814
DGRP-371	371	k	371k	x	a	a1		1	2057.219	507.72	1195.703	155.647	206.581	3760.642
DGRP-371	371	k	371k	x	a	a1		2	2376.368	490.492	1748.172	147.599	170.602	4615.032
DGRP-371	371	k	371k	x	a	a1		3	2392.017	301.454	1591.61	166.896	194.84	4285.081
DGRP-371	371	k	371k	y	a	a1		1	2545.548	575.583	2347.295	213.369	319.473	5468.426
DGRP-371	371	k	371k	y	a	a1		2	2267.433	598.915	2480.558	301.769	335.786	5346.906
DGRP-371	371	k	371k	y	a	a1		3	2618.241	448.079	2990.946	216.127	271.698	6057.266
DGRP-371	371	k	371k	y	a	a1		4	2443.753	522.705	2047.242	218.671	257.552	5013.7
DGRP-371	371	k	371k	y	a	a1		5	2549.862	440.607	2389.641	257.92	287.43	5380.11
DGRP-371	371	k	371k	y	a	a1		1	2556.805	536.876	2187.248	153.512	233.452	5280.929
DGRP-371	371	k	371k	y	a	a1		2	2147.567	446.971	2308.97	198.518	267.993	4903.508
DGRP-371	371	k	371k	y	a	a1		3	1860.348	402.163	1965.657	157.245	148.662	4228.168
DGRP-371	371	k	371k	y	a	a1		4	2205.532	318.902	2347.635	175.532	200.262	4872.069
DGRP-371	371	k	371k	y	a	a1		5	2542.12	576.161	2513.932	220.647	268.191	5632.213
DGRP-374	374	m	374m	x	a	a1		1	2580.742	506.107	2153.469	134.074	228.776	5240.318
DGRP-374	374	m	374m	x	a	a1		2	2190.468	493.284	2369.494	215.343	229.55	5053.246
DGRP-374	374	m	374m	x	a	a1		3	1830.891	380.092	1986.661	157.956	176.487	4197.644
DGRP-374	374	m	374m	x	a	a1		4	2220.544	356.002	2319.01	178.831	213.637	4895.556
DGRP-374	374	m	374m	x	a	a1		5	2510.096	538.711	2353.868	221.031	268.31	5402.675
DGRP-374	374	m	374m	y	a	a1		1	2401.105	685.473	2268.29	344.319	324.493	5354.868
DGRP-374	374	m	374m	y	a	a1		2	2403.366	375.545	1893.985	298.908	318.943	4672.896
DGRP-374	374	m	374m	y	a	a1		3	2594.501	457.292	3303.015	302.669	291.561	6354.808
DGRP-374	374	m	374m	y	a	a1		4	2419.465	583.333	2353.353	292.584	263.709	5356.151
DGRP-374	374	m	374m	y	a	a1		5				289.254	299.937
DGRP-375	375	x	375x	x	a	a1		1	2428.307	548.856	2251.922	107.229	107.977	5229.085
DGRP-375	375	x	375x	x	a	a1		2	2601.639	390.66	2500.391	117.562	140.757	5492.69
DGRP-375	375	x	375x	x	a	a1		3	2704.751	343.907		124.986	155.036
DGRP-375	375	x	375x	x	a	a1		4	2546.672	630.971	2459.248	116.55	125.206	5636.891
DGRP-375	375	x	375x	x	a	a1		5	2201.276	535.878	1997.882	123.283	162.71	4735.036
DGRP-375	375	x	375x	y	a	a1		1	2582.886	585.239	3005.721	202.21	181.597	6173.846
DGRP-375	375	x	375x	y	a	a1		2	2313.398	608.871	2466.238	217.681	195.21	5388.507
DGRP-375	375	x	375x	y	a	a1		3	2479.376	520.508	2788.109	167.9	232.059	5787.993
DGRP-375	375	x	375x	y	a	a1		4	2559.3	481.469	3118.321	257.747	227.455	6159.09
DGRP-375	375	x	375x	y	a	a1		5	2599.545	563.251	2984.702	232.018	240.296	6147.498
DGRP-380	380	y	380y	x	a	a1		1	2439.054	246.143	1395.456	105.257	188.406	4080.653
DGRP-380	380	y	380y	x	a	a1		2	2321.001	296.894	1715.617	116.45	177.42	4333.512
DGRP-380	380	y	380y	x	a	a1		3	2603.987	273.922	1852.831	123.665	117.277	4730.74
DGRP-380	380	y	380y	y	a	a1		1	2271.749	519.231	2961.162	119.255	158.765	5752.142
DGRP-380	380	y	380y	y	a	a1		2	2411.229	350.572	1765.932	108.389	161.297	4527.733
DGRP-380	380	y	380y	y	a	a1		3	1838.947	150.78	1310.439	115.656	120.934	3300.166
DGRP-383	383	p	383p	x	a	a1		1	2359.626	353.978	1765.935	149.67	146.069	4479.539
DGRP-383	383	p	383p	x	a	a1		2	2827.194	339.205	1848.818	109.753	164.115	5015.217
DGRP-383	383	p	383p	x	a	a1		3	2364.8	491.379	1833.572	112.989	158.921	4689.751
DGRP-383	383	p	383p	x	a	a1		4	2146.414	404.111	2199.29	111.748	145.523	4749.815
DGRP-383	383	p	383p	x	a	a1		5	2206.643	330.647	1648.992	141.233	170.798	4186.282
DGRP-383	383	p	383p	y	a	a1		1	2367.076	414.249	2067.608	211.344	270.428	4848.933
DGRP-383	383	p	383p	y	a	a1		2	2163.52	390.038	1553.834	234.246	248.951	4107.392
DGRP-383	383	p	383p	y	a	a1		3	2315.865	362.995	2040.102	178.525	254.783	4718.962
DGRP-383	383	p	383p	y	a	a1		4	2197.327	394.613	1567.89	186.433	245.602	4159.83
DGRP-392	392	s	392s	x	a	a1		1	1791.034	396.983	2270.155	180.372	212.547	4458.172
DGRP-392	392	s	392s	x	a	a1		2	2576.321	392.566	2495.452	125.44	205.661	5464.339
DGRP-392	392	s	392s	x	a	a1		3	2077.06	392.288	2481.179	165.443	202.343	4950.527
DGRP-392	392	s	392s	x	a	a1		4	2365.918	534.788	2014.803	131.353	186.936	4915.509
DGRP-392	392	s	392s	x	a	a1		5	2726.242	372.435	1928.983	125.847	155.403	5027.66
DGRP-392	392	s	392s	y	a	a1		1	2547.988	522.799	2239.207	219.856	297.991	5309.994
DGRP-392	392	s	392s	y	a	a1		2	2094.936	438.485	1971.639	241.272	312.154	4505.06
DGRP-392	392	s	392s	y	a	a1		3	2457.675	549.95	2390.58	242.26	296.89	5398.205
DGRP-397	397	q	397q	x	a	a1		1	3167.793	562.315	1822.651	172.246	225.413	5552.759
DGRP-397	397	q	397q	x	a	a1		2	2671.534	424.699	2117.021	262.177	253.32	5213.254
DGRP-397	397	q	397q	x	a	a1		3	3416.639	676.557	3542.783	261.499	292.147	7635.979
DGRP-397	397	q	397q	x	a	a1		4	3212.416	492.687	2449.988	241.281	330.066	6155.091
DGRP-397	397	q	397q	y	a	a1		1	1966.453	378.63	1798.36	155.127	201.22	4143.443
DGRP-397	397	q	397q	y	a	a1		2	2273.673	410.43	2085.344	204.076	233.637	4769.447
DGRP-405	405	o	405o	x	a	a1		1	2355.346	375.004	2517.265	226.492	443.059	5247.615
DGRP-405	405	o	405o	x	a	a1		2	1955.116	365.011	2182.385	130.664	209.279	4502.512
DGRP-405	405	o	405o	x	a	a1		3	2337.835	591.767	1962.08	143.863	228.687	4891.682
DGRP-405	405	o	405o	x	a	a1		4	2121.381	340.018	2621.344	168.083	151.131	5082.743
DGRP-405	405	o	405o	x	a	a1		5	2610.744	583.583	1926.241	144.385	282.534	5120.568
DGRP-405	405	o	405o	y	a	a1		1	2757.983	516.04	2505.261	213.083	277.229	5779.284
DGRP-405	405	o	405o	y	a	a1		2	2534.91	384.148	2362.148	157.445	282.464	5281.206
DGRP-405	405	o	405o	y	a	a1		3	2338.264	528.076	2352.338	197.69	267.23	5218.678
DGRP-405	405	o	405o	y	a	a1		4	2350.11	494.266	2092.07	178.961	345.774	4936.446
DGRP-439	439	g	439g	x	a	a1		1	2530.122	391.424	2262.469	128.975	142.259	5184.015
DGRP-439	439	g	439g	x	a	a1		2	2807.637	679.532	1744.201	99.789	129.405	5231.37
DGRP-439	439	g	439g	x	a	a1		3	2010.57	214.813	1776.672	135.722	166.002	4002.055
DGRP-439	439	g	439g	y	a	a1		1	2398.185	417.587	1481.148	115.172	168.826	4296.92
DGRP-439	439	g	439g	y	a	a1		2	3044.121	437.637	2149.877	159.924	168.021	5631.635
DGRP-439	439	g	439g	y	a	a1		3	2329.507	855.894	1949.245	168.107	172.329	5134.646
DGRP-439	439	g	439g	y	a	a1		4	2863.229	467.036	2642.542	160.653	257.026	5972.807
DGRP-439	439	g	439g	y	a	a1		5	2698.258	464.587	2802.228	179.593	192.99	5965.073
DGRP-441	441	u	441u	x	a	a1		1	2877.895	324.755	1821.439	154.732	152.578	5024.089
DGRP-441	441	u	441u	x	a	a1		2	2517.736	370.6	2254.356	186.043	188.216	5142.692
DGRP-441	441	u	441u	x	a	a1		3	2813.11	269.664	1356.673	163.071	242.841	4439.447
DGRP-441	441	u	441u	x	a	a1		4	2382.497	350.959	2158.303	177.507	230.235	4891.759
DGRP-441	441	u	441u	y	a	a1		1	2563.933	471.384	2017.896	232.456	241.187	5053.213
DGRP-441	441	u	441u	y	a	a1		2	2586.208	585.725	1976.96	223.487	287.145	5148.893
DGRP-441	441	u	441u	y	a	a1		3	2091.884	429.841	2104.76	266.841	300.364	4626.485
DGRP-441	441	u	441u	y	a	a1		4	2403.417	406.802	1671.533	253.922	289.91	4481.752
DGRP-486	486	d	486d	x	a	a1		1	2093.931	241.788	1711.776	102.595	185.059	4047.495
DGRP-486	486	d	486d	x	a	a1		2	2814.356	301.649	1591.261	99.833	136.559	4707.266
DGRP-486	486	d	486d	y	a	a1		1	2674.058	579.691	2035.033	259.003	359.867	5288.782
DGRP-486	486	d	486d	y	a	a1		2	2830.18	626.068	3064.625	224.612	350.902	6520.873
DGRP-486	486	d	486d	y	a	a1		3	2820.911	499.246	2424.376	186.862	295.953	5744.533
DGRP-486	486	d	486d	y	a	a1		4	2528.223	851.451	2629.138	315.228	366.448	6008.812
DGRP-486	486	d	486d	y	a	a1		5	2875.541	599.73	2992.448	306.862	262.197	6467.719
DGRP-502	502	z	502z	x	a	a1		1	2851.472	310.028	2178.28	100.07	125.858	5339.78
DGRP-502	502	z	502z	x	a	a1		2	2515.045	347.769	1687.159	136.796	249.9	4549.973
DGRP-502	502	z	502z	x	a	a1		3	2662.03	246.124	2040.444	137.755	237.588	4948.598
DGRP-502	502	z	502z	x	a	a1		4	2488.011	424.993	1722.096	106.929	149.76	4635.1
DGRP-502	502	z	502z	y	a	a1		1	3012.572	427.679	2077.719	209.593	269.985	5517.97
DGRP-502	502	z	502z	y	a	a1		2	2263.013	419.193	2131.945	256.481	310.441	4814.151
DGRP-502	502	z	502z	y	a	a1		3	2912.67	404.534	2426.999	271.299	322.144	5744.203
DGRP-502	502	z	502z	y	a	a1		4	2349.718	516.336	1648.913	191.409	316.776	4514.967
DGRP-535	535	c	535c	x	a	a1		1	2454.871	371.334	2393.297	67.955	83.168	5219.502
DGRP-535	535	c	535c	x	a	a1		2				125.274	108.063	5058.88
DGRP-535	535	c	535c	x	a	a1		3				93.539	108.708	4575.99
DGRP-535	535	c	535c	y	a	a1		1	3226.35	661.398	2845.788	273.203	329.03	6733.536
DGRP-535	535	c	535c	y	a	a1		2	2513.195	729.343	3230.87	330.648	306.177	6473.408
DGRP-535	535	c	535c	y	a	a1		3	2913.431	430.433	2876.597	221.442	272.018	6220.461
DGRP-535	535	c	535c	y	a	a1		4	2675.115	728.982	3473.281	331.814	285.808	6877.378
DGRP-535	535	c	535c	y	a	a1		5	2579.323	546.277	3070.096	259.699	231.318	6195.696
DGRP-555	555	f	555f	x	a	a1		1	2330.594	447.712	2057.621	194.428	264.093	4835.927
DGRP-555	555	f	555f	x	a	a1		2	2106.819	340.153	1924.892	147.453	288.623	4371.864
DGRP-555	555	f	555f	x	a	a1		3	2148.926	346.577	2556.143	181.694	315.129	5051.646
DGRP-555	555	f	555f	y	a	a1		1	2505.962	352.889	2439.628	238.297	350.905	5298.479
DGRP-555	555	f	555f	y	a	a1		2	2244.63	470.666		205.419	330.293
DGRP-555	555	f	555f	y	a	a1		3	2508.181	343.848	2704.761	214.75	332.661	5556.79
DGRP-555	555	f	555f	y	a	a1		4	2143.58	313.563	2485.529	232.594	271.848	4942.672
DGRP-584	584	e	584e	x	a	a1		1	2649.813	257.449	1154.742	101.105	127.615	4062.004
DGRP-584	584	e	584e	y	a	a1		1	2455.597	386.088	1563.389	143.485	185.567	4405.074
DGRP-584	584	e	584e	y	a	a1		2	2620.215	353.93	2407.377	133.887	194.973	5381.522
DGRP-584	584	e	584e	y	a	a1		3	2519.453	486.542	1903.639	142.534	263.471	4909.634
DGRP-584	584	e	584e	y	a	a1		4	2118.369	289.391	1693.009	157.266	179.066	4100.769
DGRP-584	584	e	584e	y	a	a1		5	2185.208	513.405	1787.581	144.464	191.23	4486.194
DGRP-627	627	v	627v	x	a	a1		1	1787.537	320.068	1692.266	204.068	154.242	3799.871
DGRP-627	627	v	627v	x	a	a1		2	1781.555	474.872	1469.39	160.22	176.618	3725.817
DGRP-627	627	v	627v	x	a	a1		3	1992.052	315.489	2163.973	139.759	182.386	4471.514
DGRP-627	627	v	627v	x	a	a1		4	2196.177	349.555	1830.386	192.036	157.5	4376.118
DGRP-627	627	v	627v	y	a	a1		1	2460.959	414.2	2321.979	317.106	336.024	5197.138
DGRP-627	627	v	627v	y	a	a1		2	2161.119	506.775	2693.521	370.449	336.217	5361.415
DGRP-627	627	v	627v	y	a	a1		3	2736.801	464.9	2625.752	328.726	358.206	5827.453
DGRP-627	627	v	627v	y	a	a1		4	2237.839	388.942	2412.529	236.647	310.858	5039.31
DGRP-627	627	v	627v	y	a	a1		5	2645.027	457.837	2410.144	217.086	258.211	5513.008
DGRP-707	707	h	707h	y	a	a1		1	2576.487	508.98	2322.498	309.239	336.024	5407.965
DGRP-707	707	h	707h	y	a	a1		2	2408.515	823.225	2428.398	281.375	359.987	5660.138
DGRP-707	707	h	707h	y	a	a1		3	2775.231	598.921	2965.677	342.764	309.21	6339.829
DGRP-707	707	h	707h	y	a	a1		4	2463.275	554.205	2023.389	284.257	252.792	5040.869
DGRP-707	707	h	707h	y	a	a1		5	2576.224	524.377	2161.117	307.281	318.473	5261.718
DGRP-712	712	i	712i	y	a	a1		1	2295.711	436.51	3034.375	394.084	338.385	5766.596
DGRP-712	712	i	712i	y	a	a1		2	2671.358	395.673	2966.799	359.867	363.896	6033.83
DGRP-712	712	i	712i	y	a	a1		3	2170.437	311.82	2328.757	332.677	324.846	4811.014
DGRP-712	712	i	712i	y	a	a1		4	2567.956	386.99	3209.012	293.069	316.544	6163.958
DGRP-738	738	l	738l	x	a	a1		1	2311.569	319.029	1622.814	160.465	206.61	4253.412
DGRP-738	738	l	738l	x	a	a1		2	2416.922	352.143	1788.586	205.897	229.167	4557.651
DGRP-738	738	l	738l	y	a	a1		1	2426.033	454.99	2884.395	251.149	213.844	5765.418
DGRP-738	738	l	738l	y	a	a1		2	2885.95	364.608	1994.566	256.234	247.908	5245.124
DGRP-748	748	m	748m	x	a	a1		1	2623.814	333.061	1710.956	112.079	115.333	4667.831
DGRP-748	748	m	748m	x	a	a1		2	2963.28	298.653	2102.2	101.216	124.579	5364.133
DGRP-748	748	m	748m	x	a	a1		3	1887.689	482.839	1977.163	143.416	152.28	4347.691
DGRP-748	748	m	748m	x	a	a1		4	2507.4	293.652	2019.634	139.934	140.538	4820.686
DGRP-748	748	m	748m	y	a	a1		1	2958.197	458.858	2152.636	178.78	188.13	5569.691
DGRP-748	748	m	748m	y	a	a1		2	2687.058	542.423	2025.679	144.02	253.817	5255.16
DGRP-748	748	m	748m	y	a	a1		3	2843.155	440.246	2351.891	201.034	195.235	5635.292
DGRP-748	748	m	748m	y	a	a1		4	2816.082	512.287	2433.25	197.932	216.09	5761.619
DGRP-738	738	p	738p	x	a	a1		1	1945.419	385.417	1751.574	124.619	141.81	4082.41
DGRP-738	738	p	738p	x	a	a1		2	1841.374	278.002	1544.429	135.916	198.105	3663.805
DGRP-738	738	p	738p	x	a	a1		3	2089.678	638.097	1812.476	149.111	108.15	4540.251
DGRP-738	738	p	738p	x	a	a1		4	1471.654	174.717	1224.501	95.362	110.605	2870.872
DGRP-738	738	p	738p	x	a	a1		5	2319.974	270.616	2133.364	145.847	186.943	4723.954
DGRP-738	738	p	738p	y	a	a1		1	2162.45	375.431	2098.169	203.087	220.582	4636.05
DGRP-738	738	p	738p	y	a	a1		2	2775.492	391.074	1793.757	238.013	283.693	4960.323
DGRP-738	738	p	738p	y	a	a1		3	2028.475	352.423	1767.026	230.7	234.277	4147.924
DGRP-738	738	p	738p	y	a	a1		4	1881.611	458.457	1704.453	267.589	229.819	4044.521
DGRP-738	738	p	738p	y	a	a1		5	1989.329	444.194	2073.976	246.099	273.595	4507.499
DGRP-812	812	y	812y	x	a	a1		1	2609.453	325.359	2332.085	216.05	195.173	5266.897
DGRP-812	812	y	812y	x	a	a1		2	2108.66	443.415	2071.013	157.963	153.48	4623.088
DGRP-812	812	y	812y	x	a	a1		3	2542.847	407.207	2603.954	124.184	125.971	5554.008
DGRP-812	812	y	812y	x	a	a1		4	2811.719	502.159	2955.838	146.499	93.826	6269.716
DGRP-812	812	y	812y	x	a	a1		5	3010.981	657.744	2364.564	137.55	128.463	6033.289
DGRP-812	812	y	812y	y	a	a1		1	2167.593	485.543	2561.528	281.237	271.664	5214.664
DGRP-812	812	y	812y	y	a	a1		2	2289.747	479.554	2868.509	246.702	264.169	5637.81
DGRP-812	812	y	812y	y	a	a1		3	2325.362	690.585	2985.087	303.613	308.058	6001.034
DGRP-812	812	y	812y	y	a	a1		4	2276.391	389.544	2833.647	212.001	231.553	5499.582
DGRP-832	832	c	832c	x	a	a1		1	2482.297	258.234	1254.043	99.875	106.674	3994.574
DGRP-832	832	c	832c	x	a	a1		2	2230.503	248.918	1493.096	104.415	113.471	3972.517
DGRP-832	832	c	832c	x	a	a1		3	2747.346	330.478	1895.411	110.948	99.783	4973.235
DGRP-832	832	c	832c	y	a	a1		1	2252.704	403.772	2068.063	281.101	324.101	4724.539
DGRP-832	832	c	832c	y	a	a1		2	2450.001	400.342	1946.359	224.7	264.093	4796.702
DGRP-832	832	c	832c	y	a	a1		3	2014.18	342.188	2306.589	285.77	303.477	4662.957
DGRP-832	832	c	832c	y	a	a1		4	2480.981	394.974	1751.285	159.628	203.631	4627.24
DGRP-832	832	c	832c	y	a	a1		5	2450.015	427.317	2622.139	271.673	227.769	5499.471
DGRP-853	853	h	853h	x	a	a1		1	3072.406	289.024	2445.177	170.523	177.588	5806.607
DGRP-853	853	h	853h	x	a	a1		2	2394.743	427.282	1703.408	228.036	239.569	4525.433
DGRP-853	853	h	853h	x	a	a1		3	3017.279	587.073	2382.605	184.537	236.052	5986.957
DGRP-853	853	h	853h	x	a	a1		4	3142.952	721.439	2267.791	153.195	255.246	6132.182
DGRP-853	853	h	853h	y	a	a1		1	3089.752	421.37	2098.306	247.773	286.575	5609.428
DGRP-853	853	h	853h	y	a	a1		2	2871.354	450.515	2366.757	212.806	220.504	5688.626
DGRP-853	853	h	853h	y	a	a1		3	2821.937	609.967	2346.486	239.957	247.077	5778.39
DGRP-853	853	h	853h	y	a	a1		4	2670.066	547.122	2304.786	263.608	211.048	5521.974
DGRP-855	855	i	855i	x	a	a1		1	2043.076	445.019	1778.839	156.149	176.838	4266.934
DGRP-855	855	i	855i	x	a	a1		2	2221.276	587.842	1594.55	128.319	168	4403.668
DGRP-855	855	i	855i	x	a	a1		3	1929.504	216.771	1620.862	172.725	149.486	3767.137
DGRP-855	855	i	855i	y	a	a1		1	2506.174	361.461	2744.737	238.635	269.35	5612.372
DGRP-855	855	i	855i	y	a	a1		2	1985.871	474.131	2952.596	330.284	280.528	5412.598
DGRP-855	855	i	855i	y	a	a1		3	2272.505	360.804	2318.657	304.176	303.293	4951.966
DGRP-855	855	i	855i	y	a	a1		4	2093.264	276.492	2227.237	257.493	258.308	4596.993
DGRP-859	859	p	859p	x	a	a1		1	2235.789	404.915	1981.635	111.503	170.301	4622.339
DGRP-859	859	p	859p	x	a	a1		2	2257.642	413.588	1892.874	103.713	102.775	4564.104
DGRP-859	859	p	859p	x	a	a1		3	2859.247	304.356	2162.368	115.098	127.009	5325.971
DGRP-859	859	p	859p	x	a	a1		4	2214.946	372.592	1894.545	119.862	115.85	4482.083
DGRP-859	859	p	859p	x	a	a1		5	2099.758	311.433	1753.8	118.113	130.36	4164.991
DGRP-859	859	p	859p	y	a	a1		1	2740.063	419.837	2073.277	300.132	270.171	5233.177
DGRP-859	859	p	859p	y	a	a1		2	2908.042	542.383	2304.54	255.875	349.409	5754.965
DGRP-859	859	p	859p	y	a	a1		3	2276.78	434.39	2224.648	344.657	304.2	4935.818
DGRP-859	859	p	859p	y	a	a1		4	2967.081	677.243	2821.483	384.633	484.703	6465.807
DGRP-913	913	v	913v	x	a	a1		1	2103.127	315.153	2340.35	131.25	199.264	4758.63
DGRP-913	913	v	913v	x	a	a1		2	3019.345	332.283	1888.944	143.447	203.872	5240.572
DGRP-913	913	v	913v	x	a	a1		3	2372.759	251.648	2197.861	146.793	158.185	4822.268
DGRP-913	913	v	913v	x	a	a1		4	1993.931	347.273		137.922	162.778
DGRP-913	913	v	913v	y	a	a1		1	2444.332	692.885	2988.397	325.182	258.147	6125.614
DGRP-913	913	v	913v	y	a	a1		2	3125.18	920.217	2932.66	355.559	331.322	6978.057
DGRP-913	913	v	913v	y	a	a1		3	2524.532	572.232	2822.024	228.473	270.305	5918.788
DGRP-913	913	v	913v	y	a	a1		4	2394	426.55	2218.66	152.198	184.311	5039.21
DGRP-913	913	v	913v	y	a	a1		5	2507.685	297.249	1918.964	203.788	202.465	4723.898
DGRP-32	32	j	32j	x	a	a2		1	2774.95	299.182	1964.942	127.203	224.735	5039.074
DGRP-32	32	j	32j	x	a	a2		2	2617.326	405.957	1841.62	134.583	191.366	4864.903
DGRP-32	32	j	32j	x	a	a2		3	2364.117	469.605	2142.423	113.4	170.244	4976.145
DGRP-32	32	j	32j	x	a	a2		4	2341.188	493.409	1944.8	127.682	163.95	4779.397
DGRP-32	32	j	32j	x	a	a2		5	2515.9	253.47	1885.954	139.036	176.787	4655.324
DGRP-32	32	j	32j	x	a	a2		6	2194.147	448.107	1666.857	156.739	145.417	4309.111
DGRP-32	32	j	32j	y	a	a2		1	2572.69	456.367	2633.312	376.104	337.063	5662.369
DGRP-32	32	j	32j	y	a	a2		2	2306.939	511.014	3020.941	300.493	292.56	5838.894
DGRP-32	32	j	32j	y	a	a2		3	2661.151	680.13	2757.358	399.846	374.284	6098.639
DGRP-32	32	j	32j	y	a	a2		4	2860.966	730.269	3162.608	285.395	361.25	6753.843
DGRP-38	38	u	38u	x	a	a2		1	2283.328	338.344	1325.657	189.219	307.672	3947.329
DGRP-38	38	u	38u	x	a	a2		2	1873.17	342.043	1671.311	198.696	157.654	3886.524
DGRP-38	38	u	38u	x	a	a2		3	1902.631	297.91	1845.239	195.077	263.263	4045.78
DGRP-38	38	u	38u	x	a	a2		4	2074.736	504.129	1905.543	221.931	273.021	4484.408
DGRP-38	38	u	38u	y	a	a2		1	1918.453	402.085	1759.112	146.034	261.216	4079.65
DGRP-38	38	u	38u	y	a	a2		2	3039.128	411.58	2167.602	286.166	354.089	5618.31
DGRP-38	38	u	38u	y	a	a2		3	3704.74	407.063	2988.518	286.607	427.579	7100.321
DGRP-59	59	x	59x	x	a	a2		1	2644.029	403.456	1231.676	84.291	112.967	4279.161
DGRP-59	59	x	59x	x	a	a2		2	1327.093	268.819	1280.458	146.005	105.683	2876.37
DGRP-59	59	x	59x	x	a	a2		3				75.094	106.126
DGRP-59	59	x	59x	y	a	a2		1	2818.44	768.491	2504.564	348.368	388.422	6091.495
DGRP-59	59	x	59x	y	a	a2		2	2445.458	825.115	3464.283	392.806	457.671	6734.856
DGRP-59	59	x	59x	y	a	a2		3	2473.224	874.581	2491.094	352.543	287.7	5838.899
DGRP-59	59	x	59x	y	a	a2		4	2491.832	853.696	2815.293	348.923	407.542	6160.821
DGRP-59	59	x	59x	y	a	a2		5	2916.167	817.493	2727.868	239.609	320.125	6461.528
DGRP-136	136	s	136s	x	a	a2		1				89.065	116.122
DGRP-136	136	s	136s	x	a	a2		2				98.188	126.101
DGRP-136	136	s	136s	x	a	a2		3				89.214	148.121
DGRP-136	136	s	136s	x	a	a2		4				155.942	114.729
DGRP-136	136	s	136s	x	a	a2		5				95.264	126.541
DGRP-136	136	s	136s	y	a	a2		1	1893.078	532.097	2564.414	394.075	382.562	4989.589
DGRP-136	136	s	136s	y	a	a2		2	2635.378	607.642	2692.197	244.144	399.562	5935.217
DGRP-136	136	s	136s	y	a	a2		3	2826.665	672.836	3209.526	365.349	431.261	6709.027
DGRP-136	136	s	136s	y	a	a2		4				307.116	306.684
DGRP-307	307	p	307p	x	a	a2		1	2292.41	424.69	1794.035	133.642	99.806	4511.135
DGRP-307	307	p	307p	x	a	a2		2	1904.772	266.559	1933.568	110.464	109.777	4104.899
DGRP-307	307	p	307p	x	a	a2		3	2008.832	263.735	1418.17	79.026	151.373	3690.737
DGRP-307	307	p	307p	x	a	a2		4	1615.694	463.783	1359.832	102.893	162.795	3439.309
DGRP-307	307	p	307p	y	a	a2		1	2300.295	519.145	2260.235	350.783	287.644	5079.675
DGRP-307	307	p	307p	y	a	a2		2	2697.082	575.627	2510.293	318.372	388.967	5783.002
DGRP-307	307	p	307p	y	a	a2		3	2397.701	499.004	2717.379	238.879	304.017	5614.084
DGRP-307	307	p	307p	y	a	a2		4	2529.043	566.572	1893.361	182.735	212.736	4988.976
DGRP-307	307	p	307p	y	a	a2		5	2519.195	306.34	2103.009	198.006	240.633	4928.544
DGRP-317	317	a	317a	x	a	a2		1	2843.742	342.834	2046.453	103.72	149.339	5233.029
DGRP-317	317	a	317a	x	a	a2		2	2546.354	392.252	2089.641	114.467	132.904	5028.247
DGRP-317	317	a	317a	x	a	a2		3				109.062	107.25
DGRP-317	317	a	317a	x	a	a2		4				101.262	160.322
DGRP-317	317	a	317a	x	a	a2		5				122.996	103.054
DGRP-317	317	a	317a	y	a	a2		1	2993.36	511.074	2762.535	171.21	240.469	6266.969
DGRP-317	317	a	317a	y	a	a2		2	2389.161	412.424	2011.784	184.391	233.997	4813.369
DGRP-317	317	a	317a	y	a	a2		3	2905.12	595.185	2502.004	236.818	375.758	6002.309
DGRP-317	317	a	317a	y	a	a2		4	2825.952	440.698	3003.99	244.125	291.907	6270.64
DGRP-317	317	a	317a	y	a	a2		5				301.134	266.486
DGRP-357	357	u	357u	x	a	a2		1	2122.885	529.426	2348.601	96.736	156.592	5000.912
DGRP-357	357	u	357u	x	a	a2		2	1733.376	271.686	1737.885	100.859	132.558	3742.947
DGRP-357	357	u	357u	x	a	a2		3	1714.887	433.898	1940.285	92.277	168.246	4089.07
DGRP-357	357	u	357u	x	a	a2		4	2471.726	309.203	1695.618	106.44	154.674	4476.547
DGRP-370	370	j	370j	x	a	a2		1	2155.747	308.088	1549.774	120.901	114.497	4013.609
DGRP-370	370	j	370j	x	a	a2		2	2277.622	371.013	1500.583	105.06	118.667	4149.218
DGRP-370	370	j	370j	x	a	a2		3	1043.149	239.17	1089.738	201.9	143.937	2372.057
DGRP-370	370	j	370j	x	a	a2		4	2055.424	174.552	908.607	87.932	141.877	3138.583
DGRP-370	370	j	370j	x	a	a2		5	2101.44	292.226	1434.334	113.083	171.261	3828
DGRP-370	370	j	370j	y	a	a2		1	2633.102	596.015	2281.486	290.199	442.738	5510.603
DGRP-370	370	j	370j	y	a	a2		2	2568.877	614.554	2281.541	200.262	301.974	5464.972
DGRP-370	370	j	370j	y	a	a2		3	2183.563	598.254	2499.568	208.198		5281.385
DGRP-370	370	j	370j	y	a	a2		4	2313.766	490.702	2922.403	333.753	369.386	5726.871
DGRP-370	370	j	370j	y	a	a2		5	2386.171	653.112	1925.966	266.962	315.604	4965.249
DGRP-370	370	j	370j	y	a	a2		6	2979.739	614.366	2675.366	298.207	379.9	6269.471
DGRP-385	385	q	385q	y	a	a2		1	2489.948	562.517	1968.74	300.839	255.427	5021.205
DGRP-385	385	q	385q	y	a	a2		2	2311.39	412.155	1868.237	270.054	261.622	4591.782
DGRP-385	385	q	385q	y	a	a2		3	2217.502	438.597	1013.29	233.109	198.486	3669.389
DGRP-385	385	q	385q	y	a	a2		4	2178.792	483.013	2506.107	355.951	257.975	5167.912
DGRP-385	385	q	385q	y	a	a2		5	2911.168	584.385	2316.162	244.506	223.73	5811.715
DGRP-386	386	r	386r	x	a	a2		1	2430.725	820.854	1900.3	242.116	425.991	5151.879
DGRP-386	386	r	386r	x	a	a2		2	2269.973	612.238	2746.387	344.4	210.086	5628.598
DGRP-386	386	r	386r	x	a	a2		3	2350.546	585.461	1747.738	251.174	216.09	4683.745
DGRP-386	386	r	386r	x	a	a2		4	2876.397	516.922	2409.943	218.848	264.787	5803.262
DGRP-386	386	r	386r	x	a	a2		5	3329.397	253.815	2514.409	330.572	221.595	6097.621
DGRP-386	386	r	386r	y	a	a2		1	2647.617	420.267	3315.636	307.509	238.758	6383.52
DGRP-386	386	r	386r	y	a	a2		2	2684.26	534.23	3186.1	284.099	347.531	6404.59
DGRP-386	386	r	386r	y	a	a2		3	2224.276	584.447	3328.755	331.732	321.524	6137.478
DGRP-386	386	r	386r	y	a	a2		4	2785.459	602.717	3026.941	197.653	286.72	6415.117
DGRP-386	386	r	386r	y	a	a2		5	2466.735	528.943	2405.943	288.085	232.685	5401.621
DGRP-397	397	z	397z	x	a	a2		1	2275.085	455.707	2003.525	118.961	168.27	4734.317
DGRP-397	397	z	397z	x	a	a2		2	2308.115	417.591	2353	136.104	111.913	5078.706
DGRP-397	397	z	397z	x	a	a2		3	1757.546	281.085	1570.065	97.618	196.922	3608.696
DGRP-397	397	z	397z	x	a	a2		4				151.847	112.478
DGRP-397	397	z	397z	x	a	a2		5				129.3	139.44
DGRP-397	397	z	397z	y	a	a2		1	2417.696	390.483	2264.747	191.515	232.631	5072.926
DGRP-397	397	z	397z	y	a	a2		2	2493.685	730.213	3576.638	274.64	253.06	6800.536
DGRP-397	397	z	397z	y	a	a2		3	2903.865	673.911	3122.722	332.862	414.249	6700.498
DGRP-397	397	z	397z	y	a	a2		4	2141.77	486.448	2299.181	337.165	328.198	4927.399
DGRP-397	397	z	397z	y	a	a2		5	2430.236	717.5	2733.03	308.736	278.958	5880.766
DGRP-437	437	c	437c	y	a	a2		1	2256.556	403.565	2644.698	306.029	284.897	5304.819
DGRP-437	437	c	437c	y	a	a2		2	2272.473	493.609	2984.605	366.944	303.393	5750.687
DGRP-437	437	c	437c	y	a	a2		3	2374.889	720.42	1307.782	270.189	300.945	4403.091
DGRP-437	437	c	437c	y	a	a2		4	2389.391	556.038	2108.853	275.374	299.797	5054.282
DGRP-437	437	c	437c	y	a	a2		5	2546.828	421.403	1870.258	293.76	290.881	4838.489
DGRP-551	551	s	551s	x	a	a2		1	2528.823	268.724	1505.742	85.165	151.3	4303.289
DGRP-551	551	s	551s	x	a	a2		2				116.405	159.854
DGRP-551	551	s	551s	x	a	a2		3				117.735	189.361
DGRP-551	551	s	551s	x	a	a2		4				115.871	213.188
DGRP-551	551	s	551s	y	a	a2		1	2504.454	623.363	2512.271	162.644	267.861	5640.088
DGRP-551	551	s	551s	y	a	a2		2	2650.636	401.089	2063.324	163.208	241.812	5115.049
DGRP-551	551	s	551s	y	a	a2		3	2312.581	264.321	1794.665	138.708	237.471	4371.567
DGRP-551	551	s	551s	y	a	a2		4	2605.638	365.188	2145.608	150.492	261.23	5116.434
DGRP-551	551	s	551s	y	a	a2		5	1982.895	451.06	1913.329	199.778	220.452	4347.284
DGRP-556	556	u	556u	x	a	a2		1	2635.002	443.919	1801.504	103.262	106.664	4880.425
DGRP-556	556	u	556u	x	a	a2		2	1863.223	325.412	1298.615	94.881	140.814	3487.25
DGRP-556	556	u	556u	x	a	a2		3				89.616	119.616
DGRP-556	556	u	556u	x	a	a2		4				122.072	174.781
DGRP-556	556	u	556u	x	a	a2		5				108.063	108.567
DGRP-556	556	u	556u	y	a	a2		1	2602.863	430.198	2318.296	264.872	350.776	5351.357
DGRP-589	589	f	589f	x	a	a2		1	2194.221	331.209	1842.035	165.016	138.442	4367.465
DGRP-589	589	f	589f	x	a	a2		2	1905.516	350.192	1608.987	160.49	160.219	3864.695
DGRP-589	589	f	589f	x	a	a2		3	2118.663	292.551	1862.748	132.022	137.068	4273.962
DGRP-589	589	f	589f	x	a	a2		4	2072.928	450.93	1412.757	118.574	105.194	3936.615
DGRP-589	589	f	589f	x	a	a2		5	1445.456	275.819	1597.6	107.427	159.978	3318.875
DGRP-589	589	f	589f	y	a	a2		1	2709.127	377.667	1915.837	122.987	138.996	5002.631
DGRP-589	589	f	589f	y	a	a2		2	2856.164	481.482	2219.698	176.715	171.162	5557.344
DGRP-589	589	f	589f	y	a	a2		3	2753.345	414.557	2279.721	165.748	178.765	5447.623
DGRP-589	589	f	589f	y	a	a2		4	2729.358	415.302	2259.514	151.411	163.833	5404.174
DGRP-589	589	f	589f	y	a	a2		5	2568.509	352.507	2426.151	158.48	166.093	5347.167
DGRP-634	634	x	634x	x	a	a2		1	2509.214	323.783	1602.207	134.415	215.433	4435.204
DGRP-634	634	x	634x	x	a	a2		2	2279.143	400.487	1630.553	116.313	140.515	4310.183
DGRP-634	634	x	634x	x	a	a2		3	1887.837	279.782	1727.979	116.117	172.552	3895.598
DGRP-634	634	x	634x	x	a	a2		4	1325.977	319.202	1598.35	141.334	158.931	3243.529
DGRP-634	634	x	634x	x	a	a2		5	1714.362	211.114	1656.299	128.738	154.247	3581.775
DGRP-634	634	x	634x	y	a	a2		1	2363.022	569.143	2372.682	306.37	320.566	5304.847
DGRP-634	634	x	634x	y	a	a2		2	2263.909	585.681	2542.436	299.164	295.463	5392.026
DGRP-634	634	x	634x	y	a	a2		3	2341.095	586.863	2034.353	211.525	262.748	4962.311
DGRP-634	634	x	634x	y	a	a2		4	823.941	174.184	1476.583	216.415	194.669	2474.708
DGRP-634	634	x	634x	y	a	a2		5	1476.46	234.339	1303.173	178.516	170.097	3013.972
DGRP-705	705	r	705r	x	a	a2		1	2723.777	264.847	2046.598	126.143	195.607	5035.222
DGRP-705	705	r	705r	x	a	a2		2	2595.266	332.707	2430.521	146.62	172.115	5358.494
DGRP-705	705	r	705r	x	a	a2		3	2344.692	469.73	2160.454	165.823	199.873	4974.876
DGRP-705	705	r	705r	x	a	a2		4	2443.033	427.677	1735.424	143.763	190.296	4606.134
DGRP-705	705	r	705r	x	a	a2		5	1960.399	469.589	2280.151	138.262	211.478	4710.139
DGRP-705	705	r	705r	x	a	a2		6	2952.169	543.185	2212.107	152.389	205.687	5707.461
DGRP-705	705	r	705r	y	a	a2		1	2485.76	474.716	2551.714	232.246	221.935	5512.19
DGRP-705	705	r	705r	y	a	a2		2	2479.348	447.115	2496.167	209.281	283.657	5422.63
DGRP-705	705	r	705r	y	a	a2		3	2808.532	440.653	2339.773	240.648	289.059	5588.958
DGRP-705	705	r	705r	y	a	a2		4	2471.439	456.409	2543.71	286.583	266.088	5471.558
DGRP-712	712	i	712i	x	a	a2		1	2543.111	393.617	2093.201	86.932	191.675	5029.929
DGRP-712	712	i	712i	x	a	a2		2	2739.491	353.048	1873.987	89.608	159.854	4966.526
DGRP-712	712	i	712i	x	a	a2		3	2453.63	453.579	1665.016	103.138	116.545	4572.225
DGRP-712	712	i	712i	x	a	a2		4	1958.914	273.744	1862.961	97.241	152.41	4095.619
DGRP-712	712	i	712i	y	a	a2		1	3635.119	874.462	3188.107	229.334	251.308	7697.688
DGRP-712	712	i	712i	y	a	a2		2	2607.211	724.769	2501.031	181.149	273.576	5833.011
DGRP-712	712	i	712i	y	a	a2		3	3230.618	727.897	2983.111	290.205	290.757	6941.626
DGRP-712	712	i	712i	y	a	a2		4	3101.953	704.355	2995.557	335.739	320.531	6801.865
DGRP-714	714	s	714s	x	a	a2		1	1852.33	297.647	2005.332	117.604	145.691	4155.309
DGRP-714	714	s	714s	x	a	a2		2	1807.328	287.564	1384.066	125.601	130.572	3478.958
DGRP-714	714	s	714s	x	a	a2		3	1878.39	317.19	1264.36	113.219	131.192	3459.94
DGRP-714	714	s	714s	x	a	a2		4	1649.715	465.833	1758.657	105.194	155.91	3874.205
DGRP-714	714	s	714s	x	a	a2		5	2196.754	293.271	1582.73	135.665	132.542	4072.755
DGRP-714	714	s	714s	y	a	a2		1	2001.127	561.632	2274.454	182.529	212.897	4837.213
DGRP-714	714	s	714s	y	a	a2		2	2073.665	501.42	2576.282	197.09	213.113	5151.367
DGRP-714	714	s	714s	y	a	a2		3	2030.546	773.432	2296.7	206.77	208.583	5100.678
DGRP-714	714	s	714s	y	a	a2		4	2285.04	693.763	2682.024	199.563	221.359	5660.827
DGRP-714	714	s	714s	y	a	a2		5	2113.999	511.591		157.592	191.902
DGRP-786	786	n	786n	x	a	a2		1	2342.463	516.099	2129.126	99.205	112.264	4987.688
DGRP-786	786	n	786n	x	a	a2		2	2231.225	322.512	1604.873	92.69	131.472	4158.61
DGRP-786	786	n	786n	x	a	a2		3	2283.311	281.375	1573.35	101.799	121.366	4138.036
DGRP-786	786	n	786n	x	a	a2		4	2329.41	209.147	1458.652	123.8	146.342	3997.209
DGRP-786	786	n	786n	x	a	a2		5	1936.97	449.123	1259.067	107.079	106.993	3645.16
DGRP-786	786	n	786n	y	a	a2		1	2412.858	393.236	1857.611	144.316	176.2	4663.705
DGRP-786	786	n	786n	y	a	a2		2	2272.515	402.924	1687.788	148.433	210.423	4363.227
DGRP-786	786	n	786n	y	a	a2		3	2343.07	332.745	2156.198	169.441	156.448	4832.013
DGRP-786	786	n	786n	y	a	a2		4	2537.259	417.864	2267.711	163.276	222.991	5222.834
DGRP-786	786	n	786n	y	a	a2		5	2463.247	546.958	1701.916	154.716	182.003	4712.121
DGRP-802	802	t	802t	x	a	a2		1	2452.944	360.994	1580.73	112.177	128.116	4394.668
DGRP-802	802	t	802t	x	a	a2		2	2173.632	519.545	1520.867	130.2	107.229	4214.044
DGRP-802	802	t	802t	x	a	a2		3	3038.53	395.729	1995.491	111.56	112.858	5429.75
DGRP-802	802	t	802t	x	a	a2		4				130.137	158.991	4679.955
DGRP-852	852	o	852o	x	a	a2		1	2057.157	386.139	1727.466	147.03	171.896	4170.762
DGRP-852	852	o	852o	x	a	a2		2	1974.372	437.76	1004.152	122.738	177.307	3416.284
DGRP-852	852	o	852o	x	a	a2		3	2356.664	246.367	1338.727	94.25	139.138	3941.758
DGRP-852	852	o	852o	x	a	a2		4	1438.31	348.077	1385.219	107.036	133.709	3171.606
DGRP-852	852	o	852o	x	a	a2		5	1971.047	507.229	1375.148	124.79	206.56	3853.424
DGRP-852	852	o	852o	y	a	a2		1	2551.373	382.007	2426.479	233.956	194.296	5359.859
DGRP-852	852	o	852o	y	a	a2		2	1980.534	415.681	1728.028	247.906	269.782	4124.243
DGRP-852	852	o	852o	y	a	a2		3	2347.464	496.972	1970.076	255.489	265.033	4814.512
DGRP-852	852	o	852o	y	a	a2		4	2380.724	464.262	1776.811	172.49	258.305	4621.797
DGRP-852	852	o	852o	y	a	a2		5	2350.986	386.846	1677.001	260.688	205.811	4414.833
DGRP-897	897	q	897q	x	a	a2		1	2111.143	329.608	1537.75	110.555	155.283	3978.501
DGRP-897	897	q	897q	x	a	a2		2	2076.633	435.465	1900.934	98.084	134.433	4413.032
DGRP-897	897	q	897q	x	a	a2		3	2790.909	438.435	1297.442	100.805	179.424	4526.786
DGRP-897	897	q	897q	y	a	a2		1	2930.747	508.368	2809.196	295.826		6248.311
DGRP-897	897	q	897q	y	a	a2		2	2785.513	647.585	1983.314	340.347	309.519	5416.412
DGRP-900	900	r	900r	x	a	a2		1	2772.351	658.746	1638.179	127.462	152.469	5069.276
DGRP-900	900	r	900r	x	a	a2		2	2747.13	321.352	1819.196	99.481	111.405	4887.678
DGRP-900	900	r	900r	x	a	a2		3	2043.12	352.946	1865.005	102.868	222.177	4261.071
DGRP-900	900	r	900r	y	a	a2		1	2665.898	426.679	2384.642	270.966	279.237	5477.219
DGRP-900	900	r	900r	y	a	a2		2	2497.885	405.174	1951.338	296.601	296.358	4854.397
DGRP-48	48	p	48p	x	a	a3		1	2281.955	609.933	2021.833	180.384	266.189	4913.721
DGRP-48	48	p	48p	x	a	a3		2	2194.509	506.86	2025.693	207.646	235.365	4727.062
DGRP-48	48	p	48p	x	a	a3		3	2260.578	378.083	1513.872	213.776	257.727	4152.533
DGRP-48	48	p	48p	x	a	a3		4	2031.465	454.859	2122.471	241.798	283.157	4608.795
DGRP-48	48	p	48p	x	a	a3		5	1881.435	402.039	1855.931	231.241	228.401	4139.405
DGRP-48	48	p	48p	y	a	a3		1	2516.907	546.486	2185.751	235.26	277.457	5249.144
DGRP-48	48	p	48p	y	a	a3		2	2376.967	697.494	2100.534	271.048	267.606	5174.995
DGRP-48	48	p	48p	y	a	a3		3	2080.853	523.123	1938.24	246.232	244.161	4542.216
DGRP-48	48	p	48p	y	a	a3		4	2654.977	663.473	2982.554	269.003	322.128	6301.004
DGRP-48	48	p	48p	y	a	a3		5	3060.92	706.082	2303.245	294.363	294.822	6070.247
DGRP-73	73	z	73z	x	a	a3		1	2415.61	504.498	1155.211	149.643	172.398	4075.319
DGRP-73	73	z	73z	x	a	a3		2	1868.911	422.721	1214.916	134.347	167.066	3506.548
DGRP-73	73	z	73z	x	a	a3		3	1691.593	402.289	1645.791	217.122	241.399	3739.673
DGRP-73	73	z	73z	x	a	a3		4	1981.872	340.593	1366.99	170.386	186.949	3689.455
DGRP-73	73	z	73z	y	a	a3		1	2171.288	528.678	2138.877	218.473	220.995	4838.843
DGRP-73	73	z	73z	y	a	a3		2				271.048	266.415
DGRP-85	85	w	85w	x	a	a3		1	1608.892	445.564	2357.88	231.983	349.25	4412.336
DGRP-85	85	w	85w	x	a	a3		2	1992.744	464.797	2082.08	285.971	316.436	4539.621
DGRP-85	85	w	85w	x	a	a3		3	1968.513	450.532	1802.797	283.574	247.929	4221.842
DGRP-85	85	w	85w	x	a	a3		4	1910.715	446.621	2205.672	264.284	277.792	4563.008
DGRP-85	85	w	85w	x	a	a3		5				256.551	254.468	3936.015
DGRP-85	85	w	85w	y	a	a3		1	2549.607	557.334	2645.214	389.235	344.647	5752.155
DGRP-85	85	w	85w	y	a	a3		2	2612.403	469.276	2596.439	291.694	315.971	5678.118
DGRP-85	85	w	85w	y	a	a3		3	2487.245	559.393	2367.724	313.867	345.93	5414.362
DGRP-85	85	w	85w	y	a	a3		4	2099.373	553.638	2307.4	274.409	249.922	4960.411
DGRP-85	85	w	85w	y	a	a3		5	1974.411	424.367	2287.112	321.386	246.256	4685.89
DGRP-93	93	d	93d	x	a	a3		1	1916.738	332.111	1335.712	148.946	168.6	3584.561
DGRP-93	93	d	93d	x	a	a3		2	1948.468	420.587	1298.158	133.793	170.59	3667.213
DGRP-93	93	d	93d	x	a	a3		3				113.069	117.074
DGRP-93	93	d	93d	x	a	a3		4				154.509	97.259
DGRP-93	93	d	93d	x	a	a3		5				146.342	146.744
DGRP-93	93	d	93d	y	a	a3		1	2385.481	441.973	1757.423	278.286	209.934	4584.877
DGRP-93	93	d	93d	y	a	a3		2	2373.587	435.31	2168.262	271.397	262.143	4977.159
DGRP-93	93	d	93d	y	a	a3		3	2187.179	457.391	1358.947	212.211	318.552	4003.517
DGRP-93	93	d	93d	y	a	a3		4	2699.688	625.365	2585.971	299.368	320.283	5911.024
DGRP-177	177	m	177m	x	a	a3		1	3258.627	533.683	2347.082	208.246	204.284	6139.392
DGRP-177	177	m	177m	x	a	a3		2	2694.392	446.29	1741.865	150.987	219.532	4882.547
DGRP-177	177	m	177m	x	a	a3		3	2750.302	653.244	2021.548	219.968	137.681	5425.094
DGRP-177	177	m	177m	x	a	a3		4	2893.495	594.898	1975.948	237.922	302.669	5464.341
DGRP-177	177	m	177m	x	a	a3		5	1648.416	256.831	1637.009	217.546	245.993	3542.256
DGRP-177	177	m	177m	y	a	a3		1	3301.444	764.91	2570.135	296.237	336.206	6636.489
DGRP-177	177	m	177m	y	a	a3		2	3537.885	506.837	3032.594	326.053	250.582	7077.316
DGRP-177	177	m	177m	y	a	a3		3	2665.466	430.415	2693.56	329.318	412.84	5789.441
DGRP-177	177	m	177m	y	a	a3		4	3460.112	494.357	3134.039	351.656	346.537	7088.508
DGRP-190	190	o	190o	x	a	a3		1	2312.431	314.632	2049.642	98.827	128.429	4676.705
DGRP-190	190	o	190o	x	a	a3		2	1862.872	402.662	2193.476	116.677	144.972	4459.01
DGRP-190	190	o	190o	x	a	a3		3	2046.651	302.383	1423.703	112.664	142.814	3772.737
DGRP-190	190	o	190o	x	a	a3		4	1785.131	236.682	1543.603	110.635	114.55	3565.416
DGRP-190	190	o	190o	x	a	a3		5	2084.12	373.362	1528.67	149.184	156.332	3986.152
DGRP-190	190	o	190o	y	a	a3		1	2368.408	405.334	2305.389	233.006	254.867	5079.131
DGRP-190	190	o	190o	y	a	a3		2	1826.238	308.39	3108.778	196.1	281.082	5243.406
DGRP-190	190	o	190o	y	a	a3		3	2161.4	576.62	2503.43	297.139	294.461	5241.45
DGRP-321	321	e	321e	x	a	a3		1	2151.938	298.121	1888.696	104.027	125.766	4338.755
DGRP-321	321	e	321e	x	a	a3		2	2070.615	218.868	1976.874	99.292	103.374	4266.357
DGRP-321	321	e	321e	x	a	a3		3				127.302	120.369	3479.124
DGRP-321	321	e	321e	x	a	a3		4				99.77	114.253
DGRP-321	321	e	321e	x	a	a3		5				122.931	129.759
DGRP-321	321	e	321e	y	a	a3		1	2668.672	595.011	2829.344	339.388	304.825	6093.027
DGRP-321	321	e	321e	y	a	a3		2	1799.422	501	2556.499	177.124	278	4856.921
DGRP-321	321	e	321e	y	a	a3		3	2149.209	622.985	3066.956	342.187	364.56	5839.15
DGRP-321	321	e	321e	y	a	a3		4	2323.683	765.406	1987.296	242.401	273.326	5076.385
DGRP-321	321	e	321e	y	a	a3		5	2555.486	548.392	2758.148	214.866	235.734	5862.026
DGRP-340	340	d	340d	x	a	a3		1	1674.031	269.908	1001.361	128.265	142.008	2945.3
DGRP-340	340	d	340d	x	a	a3		2	1459.379	226.463	971.266	169.633	171.126	2657.108
DGRP-340	340	d	340d	x	a	a3		3	1836.7	283.226	1614.621	160.718	153.085	3734.547
DGRP-340	340	d	340d	x	a	a3		4				130.446	146.181	3577.091
DGRP-340	340	d	340d	y	a	a3		1	1641.456	324.885	1176.303	163.869	184.299	3142.644
DGRP-340	340	d	340d	y	a	a3		2	2033.912	507.444	1994.498	176.258	243.029	4535.854
DGRP-340	340	d	340d	y	a	a3		3	2451.674	409.086	1883.072	131.104	224.612	4743.832
DGRP-340	340	d	340d	y	a	a3		4	2912.555	343.924	1886.049	210.367	260.432	5142.528
DGRP-340	340	d	340d	y	a	a3		5	2203.2	373.506	1312.808	217.302	207.311	3889.514
DGRP-348	348	m	348m	x	a	a3		1	1573.463	589.808	1971.885	119.682	163.328	4135.156
DGRP-348	348	m	348m	x	a	a3		2	2007.661	479.228	2407.359	137.026	208.121	4894.248
DGRP-348	348	m	348m	x	a	a3		3	2652.708	400.803	2012.514	125.274	157.614	5066.025
DGRP-348	348	m	348m	x	a	a3		4	2182.603	338.138	1645.005	137.844	204.848	4165.746
DGRP-348	348	m	348m	x	a	a3		5				106.064	164.239
DGRP-348	348	m	348m	y	a	a3		1	2245.867	452.075	1814.14	322.882	304.778	4512.082
DGRP-348	348	m	348m	y	a	a3		2	2364.894	699.821	2378.845	191.782	226.622	5443.56
DGRP-348	348	m	348m	y	a	a3		3	2208.886	549.181	2176.664	201.877	335.843	4934.731
DGRP-348	348	m	348m	y	a	a3		4	2481.423	639.551	1943.338	224.922	291.14	5064.312
DGRP-348	348	m	348m	y	a	a3		5	2476.428	524.184	2372.926	267.964	293.388	5373.538
DGRP-354	354	n	354n	x	a	a3		1	2103.953	366.658	1713.307	121.8	250.967	4183.918
DGRP-354	354	n	354n	x	a	a3		2	2213.168	476.398	2008.091	127.113	249.846	4697.657
DGRP-354	354	n	354n	x	a	a3		3	2365.997	336.934	1829.287	111.842	250.445	4532.218
DGRP-354	354	n	354n	x	a	a3		4	2292.123	342.009	2361.986	128.198	227.41	4996.118
DGRP-354	354	n	354n	x	a	a3		5	1946.56	414.01	1581.131	110.403	145.741	3941.701
DGRP-354	354	n	354n	y	a	a3		1	2886.818	719.227	2903.712	152.792	198.137	6509.757
DGRP-354	354	n	354n	y	a	a3		2	2397.607	647.29	2643.873	175.864	247.298	5688.77
DGRP-354	354	n	354n	y	a	a3		3	2588.233	719.775	2413.717	179.253	221.253	5721.725
DGRP-354	354	n	354n	y	a	a3		4	2579.19	657.676	3026.051	210.95	253.32	6262.917
DGRP-354	354	n	354n	y	a	a3		5	2492.812	687.572	2241.193	177.475	272.242	5421.577
DGRP-373	373	l	373l	x	a	a3		1	2555.304	405.958	2031.707	213.258	304.493	4992.969
DGRP-373	373	l	373l	x	a	a3		2	2470.251	480.611	2327.345	315.311	363.498	5278.207
DGRP-373	373	l	373l	y	a	a3		1	2739.279	547.826	2892.325	362.941	329.539	6179.43
DGRP-373	373	l	373l	y	a	a3		2	2836.266	598.015	2842.757	399.863	335.8	6277.038
DGRP-373	373	l	373l	y	a	a3		3	2474.732	334.544	1965.223	282.466	412.811	4774.499
DGRP-373	373	l	373l	y	a	a3		4	3125.494	525.145	3061.354	352.157	324.007	6711.993
DGRP-377	377	n	377n	x	a	a3		1	2790.792	541.615	1558.729	228.602	194.102	4891.136
DGRP-377	377	n	377n	x	a	a3		2	2220.359	288.022	2154.197	236.073	213.834	4662.578
DGRP-377	377	n	377n	x	a	a3		3	1626.445	342.887	2123.805	267.385	177.039	4093.137
DGRP-377	377	n	377n	x	a	a3		4	2212.796	183.904	2137.284	236.986	167.716	4533.984
DGRP-377	377	n	377n	x	a	a3		5	1874.847	230.442	1533.259	201.152	174.692	3638.548
DGRP-377	377	n	377n	y	a	a3		1	2773.015	359.039	2431.557	270.818	291.383	5563.611
DGRP-377	377	n	377n	y	a	a3		2	2628.416	519.032	2339.48	269.283	373.637	5486.928
DGRP-377	377	n	377n	y	a	a3		3	2522.484	379.06	2334.396	297.824	322.204	5235.94
DGRP-390	390	o	390o	x	a	a3		1	2077.718	382.229	1743.793	199.75	272.061	4203.74
DGRP-390	390	o	390o	x	a	a3		2	1684.516	430.129	1758.837	199.376	235.181	3873.482
DGRP-390	390	o	390o	x	a	a3		3	1732.693	457.55	1714.273	210.771	281.381	3904.516
DGRP-390	390	o	390o	x	a	a3		4	1911.621	323.015	1519.636	164.187	217.379	3754.272
DGRP-390	390	o	390o	x	a	a3		5	2126.713	461.374	1880.874	166.67	243.821	4468.961
DGRP-390	390	o	390o	y	a	a3		1	2339.542	624.678	2231.678	251.964	258.459	5195.898
DGRP-390	390	o	390o	y	a	a3		2	2293.796	538.152	2458.447	218.612	331.254	5290.395
DGRP-390	390	o	390o	y	a	a3		3	2113.368	631.494	2596.671	239.13	332.42	5341.533
DGRP-390	390	o	390o	y	a	a3		4	2235.957	728.845	1864.109	279.846	311.537	4828.911
DGRP-399	399	a	399a	x	a	a3		1	2519.233	318.024	1530.213	228.496	213.34	4367.47
DGRP-399	399	a	399a	x	a	a3		2	2356.718	324.695	1935.563	240.39	284.099	4616.976
DGRP-399	399	a	399a	x	a	a3		3	1743.119	324.422	1751.939	291.732	297.671	3819.48
DGRP-399	399	a	399a	x	a	a3		4	2352.516	288.121	1657.659	192.184	185.779	4298.296
DGRP-399	399	a	399a	x	a	a3		5	1992.938	291.01	2444.058	217.718	348.31	4728.006
DGRP-399	399	a	399a	y	a	a3		1	3124.76	589.618	2555.736	280.49	324.193	6270.114
DGRP-399	399	a	399a	y	a	a3		2	2641.004	476.529	3238.22	298.289	363.37	6355.753
DGRP-399	399	a	399a	y	a	a3		3	2062.686	464.702	1935.62	270.994	281.362	4463.008
DGRP-399	399	a	399a	y	a	a3		4	2441.273	658.791	2575.924	275.456	337.348	5675.988
DGRP-399	399	a	399a	y	a	a3		5	2562.66	460.809	2603.362	249.158	289.036	5626.831
DGRP-443	443	v	443v	x	a	a3		1	2119.47	242.669	2162.761	100.879	169.105	4524.9
DGRP-443	443	v	443v	x	a	a3		2	2348.627	324.012	2555.852	108.376	116.423	5228.491
DGRP-443	443	v	443v	x	a	a3		3				159.913	138.245
DGRP-443	443	v	443v	y	a	a3		1	2443.946	637.236	3506.936	264.63	298.118	6588.118
DGRP-443	443	v	443v	y	a	a3		2	2410.167	490.832	2589.496	206.908	270.887	5490.495
DGRP-443	443	v	443v	y	a	a3		3	2616.375	501.367	3050.77	296.067	272.394	6168.512
DGRP-443	443	v	443v	y	a	a3		4	2868.945	811.419	4484.908	297.221	399.131	8165.272
DGRP-443	443	v	443v	y	a	a3		5	3014.474	714.16	4095.19	346.069	388.656	7823.824
DGRP-595	595	g	595g	x	a	a3		1	2307.252	310.159	1524.953	153.253	198.952	4142.364
DGRP-595	595	g	595g	x	a	a3		2	2442.215	424.967	1827.807	116.704	171.563	4694.989
DGRP-595	595	g	595g	y	a	a3		1	2346.836	484.073	2419.559	219.115	259.515	5250.468
DGRP-595	595	g	595g	y	a	a3		2	2383.202	447.7	2526.402	225.474	306.228	5357.304
DGRP-595	595	g	595g	y	a	a3		3	2388.745	631.579	2326.309	179.645	280.662	5346.633
DGRP-595	595	g	595g	y	a	a3		4	2616.043	684.049	2626.573	247.464	275.107	5926.665
DGRP-595	595	g	595g	y	a	a3		5	2247.345	702.516	2511.263	237.095	279.915	5461.124
DGRP-703	703	h	703h	x	a	a3		1	2716.337	310.276	1285.106	89.25	96.181	4311.719
DGRP-703	703	h	703h	x	a	a3		2	2626.95	483.37	2458.291	110.323	93.775	5568.611
DGRP-703	703	h	703h	x	a	a3		3				97.732	109.753
DGRP-703	703	h	703h	x	a	a3		4				101.361	133.135
DGRP-703	703	h	703h	y	a	a3		1	2369.343	546.79	2079.901	320.677	352.168	4996.034
DGRP-703	703	h	703h	y	a	a3		2	2863.413	460.423	3066.504	300.327	363.028	6390.34
DGRP-703	703	h	703h	y	a	a3		3	2032.402	558.906	1503.251	370.084	344.112	4094.559
DGRP-703	703	h	703h	y	a	a3		4	2302.425	752.795	2926.173	310.85	306.869	5981.393
DGRP-776	776	c	776c	x	a	a3		1	2868.992	342.992	2047.345	140.482	285.742	5259.329
DGRP-776	776	c	776c	x	a	a3		2	2366.834	331.429	2606.048	160.04	241.969	5304.311
DGRP-776	776	c	776c	x	a	a3		3	3124.059	431.209	1733.279	161.555	234.578	5288.547
DGRP-776	776	c	776c	x	a	a3		4	1969.342	321.531	1649.438	184.083	238.879	3940.311
DGRP-776	776	c	776c	x	a	a3		5	1883.122	414.622	1955.241	186.19	286.493	4252.985
DGRP-776	776	c	776c	y	a	a3		1	2411.893	484.514	2525.275	262.463	326.754	5421.682
DGRP-776	776	c	776c	y	a	a3		2	2480.325	376.091	2104.249	195.826	253.095	4960.665
DGRP-776	776	c	776c	y	a	a3		3	2008.602	271.2	1855.048	180.499	287.738	4134.85
DGRP-776	776	c	776c	y	a	a3		4	2393.88	385.503	2331.449	166.714	260.103	5110.832
DGRP-776	776	c	776c	y	a	a3		5	2194.16	410.052	2364.196	171.636	219.435	4968.408
DGRP-801	801	s	801s	x	a	a3		1	2471.865	550.539	1645.98	197.613	212.505	4668.384
DGRP-801	801	s	801s	x	a	a3		2	1609.553	274.008	993.346	266.518	301.121	2876.907
DGRP-801	801	s	801s	x	a	a3		3	2408.877	435.922	1922.463	245.733	223.233	4767.262
DGRP-801	801	s	801s	x	a	a3		4	2806.684	286.329	2060.018	181.495	351.622	5153.031
DGRP-801	801	s	801s	y	a	a3		1	2981.868	499.949	1926.368	224.78	275.363	5408.185
DGRP-801	801	s	801s	y	a	a3		2	2763.771	413.932	2031.15	224.343	259.225	5208.853
DGRP-801	801	s	801s	y	a	a3		3	3238.955	657.702	2829.434	293.099	322.882	6726.091
DGRP-801	801	s	801s	y	a	a3		4	3072.241	494.04	2320.597	272.112	277.5	5886.878
DGRP-801	801	s	801s	y	a	a3		5	2956.821	481.543	2592.064	307.541	237.588	6030.428
DGRP-805	805	t	805t	x	a	a3		1	2894.439	537.356	2517.903	211.476	233.988	5949.698
DGRP-805	805	t	805t	x	a	a3		2	3053.792	440.912	2383.349	183.514	258.682	5878.053
DGRP-805	805	t	805t	x	a	a3		3	2788.762	475.527	2290.804	172.942	298.87	5555.093
DGRP-805	805	t	805t	x	a	a3		4	2850.667	465.393	3566.503	165.574	190.211	6882.563
DGRP-805	805	t	805t	x	a	a3		5	2522.483	497.384	1944.443	160.533	159.997	4964.31
DGRP-805	805	t	805t	y	a	a3		1	2777.303	433.575	2486.642	267.067	331.575	5697.52
DGRP-805	805	t	805t	y	a	a3		2	3412.868	662.581	2722.801	296.139	295.502	6798.25
DGRP-805	805	t	805t	y	a	a3		3	2893.841	439.58	2841.488	254.644	376.603	6174.909
DGRP-805	805	t	805t	y	a	a3		4	2619.207	587.662	3444.704	312.258	373.777	6651.573
DGRP-805	805	t	805t	y	a	a3		5	2684.759	558.218	2690.311	259.341	376.517	5933.288
DGRP-819	819	i	819i	x	a	a3		1	2644.962	384.42	2245.792	157.714	146.395	5275.174
DGRP-819	819	i	819i	x	a	a3		2	2679.818	348.776	1873.631	158.723	235.337	4902.225
DGRP-819	819	i	819i	x	a	a3		3	3026.292	522.488	2135.71	173.25	217.352	5684.49
DGRP-819	819	i	819i	x	a	a3		4				190.118
DGRP-819	819	i	819i	x	a	a3		5				242.896
DGRP-819	819	i	819i	y	a	a3		1	3078.874	711.59	2814.967	328.442	303.264	6605.431
DGRP-819	819	i	819i	y	a	a3		2	3606.669	661.894	2608.205	305.303	280.333	6876.768
DGRP-819	819	i	819i	y	a	a3		3	2705.797	669.976	2913.57	283.643	263.356	6289.343
DGRP-819	819	i	819i	y	a	a3		4	2672.261	506.454	2650.122	258.317	316.092	5828.837
DGRP-850	850	g	850g	x	a	a3		1	1947.667	369.187	1509.4	112.177	165.105	3826.254
DGRP-850	850	g	850g	x	a	a3		2	2190.563	410.638	1729.652	118.688	173.57	4330.853
DGRP-850	850	g	850g	x	a	a3		3	2054.649	530.163	1895.61	102.09	140.714	4480.422
DGRP-850	850	g	850g	x	a	a3		4	2138.902	356.583	1751.547	112.956	107.977	4247.032
DGRP-850	850	g	850g	x	a	a3		5	2419.439	500.553		99.75	167.455
DGRP-850	850	g	850g	y	a	a3		1	2821.643	523.728	4641.93	365.361	338.355	7987.301
DGRP-850	850	g	850g	y	a	a3		2	2307.008	524.905	3881.058	320.813	258.786	6712.971
DGRP-850	850	g	850g	y	a	a3		3	2780.659	905.132	2866.154	290.128	289.441	6551.945
DGRP-850	850	g	850g	y	a	a3		4	2469.507	718.638	2903.467	297.98	392.848	6091.612
DGRP-850	850	g	850g	y	a	a3		5	2446.592	614.734	2823.287	354.283	476.767	5884.613
DGRP-890	890	o	890o	y	a	a3		1	2507.709	459.31	1904.764	279.616	372.366	4871.783
DGRP-890	890	o	890o	y	a	a3		2	3892.232	682.778	3042.56	265.212	309.989	7617.57
DGRP-890	890	o	890o	y	a	a3		3	2387.121	620.642	2010.008	280.865	274.136	5017.771
DGRP-913	913	v	913v	x	a	a3		1	2272.581	235.908	1609.616	267.295	266.328	4118.105
DGRP-913	913	v	913v	x	a	a3		2	1928.122	415.093	1620.945	210.782	230.29	3964.16
DGRP-913	913	v	913v	x	a	a3		3	2220.671	350.192	1670.963	300.885	296.035	4241.826
DGRP-913	913	v	913v	x	a	a3		4	1998.699	451.871	1928.276	238.333	297.888	4378.846
DGRP-913	913	v	913v	x	a	a3		5	3566.543	566.188	2703.274	130.613	208	6836.005
DGRP-913	913	v	913v	y	a	a3		1	2179.302	715.504	2299.871	285.083	432.63	5194.677
DGRP-913	913	v	913v	y	a	a3		2	2147.371	517.585	3042.001	400.323	428.083	5706.957
DGRP-913	913	v	913v	y	a	a3		3	2247.228	806.548	2479.688	419.928	431.483	5533.464
DGRP-913	913	v	913v	y	a	a3		4	2332.51	820.415	3003.611	365.75	466.243	6156.536
DGRP-41	41	v	41v	x	a	a4		1	2296.021	337.323	1238.707	114.033	136.624	3872.051
DGRP-41	41	v	41v	x	a	a4		2	1661.017	325.632	1637.844	127.892	151.265	3624.493
DGRP-41	41	v	41v	y	a	a4		1	2579.07	422.561	4495.79	245.993	294.15	7497.421
DGRP-41	41	v	41v	y	a	a4		2	2204.047	613.125	2078.116	327.724	334.518	4895.288
DGRP-57	57	c	57c	x	a	a4		1	1219.003	141.41	1409.416	70.405	117.742	2769.829
DGRP-57	57	c	57c	x	a	a4		2	1670.287	311.683	945.729	103.356	134.539	2927.699
DGRP-57	57	c	57c	y	a	a4		1	2123.448	399.969	2103.98	253.081	221.759	4627.397
DGRP-57	57	c	57c	y	a	a4		2	1984.809	291.091	1543.886	182.401	195.392	3819.786
DGRP-57	57	c	57c	y	a	a4		3	2262.077	446.85	2053.92	212.109	195.201	4762.847
DGRP-57	57	c	57c	y	a	a4		4	2018.849	363.754	1744.418	188.5	212.094	4127.021
DGRP-57	57	c	57c	y	a	a4		5	2087.196	385.301	1680.723	237.367	249.196	4153.22
DGRP-91	91	c	91c	x	a	a4		1	2125.609	352.767	1350.418	92.4	143.828	3828.794
DGRP-91	91	c	91c	x	a	a4		2						4158.98
DGRP-91	91	c	91c	y	a	a4		1	2083.361	507.718	2232.848	284.567	356.266	4823.927
DGRP-91	91	c	91c	y	a	a4		2	2474.621	447.725	2564.306	283.579	180.205	5486.652
DGRP-91	91	c	91c	y	a	a4		3	1817.266	417.449	2051.846	321.967	266.351	4286.561
DGRP-91	91	c	91c	y	a	a4		4	2282.05	497.311	2789.714	280.607	398.032	5569.075
DGRP-109	109	e	109e	x	a	a4		1	2749.65	478.605	1796.65	168.366	206.282	5024.905
DGRP-109	109	e	109e	x	a	a4		2	2360.127	419.043	2043.481	224.956	267.972	4822.651
DGRP-109	109	e	109e	x	a	a4		3	2641.523	590.291	2065.36	254.485	231.246	5297.174
DGRP-109	109	e	109e	y	a	a4		1	3106.918	512.894	2669.114	269.652	338.966	6288.926
DGRP-109	109	e	109e	y	a	a4		2	2399.735	737.695	3244.54	280.364	264.263	6381.97
DGRP-109	109	e	109e	y	a	a4		3	2367.396	549.081	2306.768	259.413	353.626	5223.245
DGRP-109	109	e	109e	y	a	a4		4	2662.688	569.052	2551.474	299.265	347.706	5783.214
DGRP-109	109	e	109e	y	a	a4		5	2746.265	746.08	2411.528	292.262	417.625	5903.873
DGRP-158	158	j	158j	x	a	a4		1	2817.731	491.671	2187.451	248.806	273.579	5496.853
DGRP-158	158	j	158j	x	a	a4		2	2702.287	627.071		192.735	226.433
DGRP-158	158	j	158j	x	a	a4		3	2310.528	440.528	1994.469	214.223	229.639	4745.525
DGRP-158	158	j	158j	y	a	a4		1	2774.435	671.195	2589.531	348.365	306.947	6035.161
DGRP-158	158	j	158j	y	a	a4		2	2654.039	652.236	2285.825	242.624	268.653	5592.1
DGRP-158	158	j	158j	y	a	a4		3	2266.832	705.803	2225.187	262.938	315.046	5197.822
DGRP-176	176	l	176l	x	a	a4		1	1919.338	200.55	1211.513	128.265	114.657	3331.401
DGRP-176	176	l	176l	x	a	a4		2	1816.279	319.944	1411.654	90.361	182.82	3547.877
DGRP-176	176	l	176l	x	a	a4		3	1725.608	436.968	1075.322	79.454	154.528	3237.898
DGRP-176	176	l	176l	x	a	a4		4	1820.632	388.576	1579.532	119.496	117.075	3788.74
DGRP-176	176	l	176l	y	a	a4		1	1536.017	456.824	1333.533	333.933	302.638	3326.374
DGRP-176	176	l	176l	y	a	a4		2	1973.484	527.575	1662.872	265.613	253.744	4163.931
DGRP-223	223	r	223r	x	a	a4		1	2603.779	329.646	2111.036	112.399	140.619	5044.461
DGRP-223	223	r	223r	x	a	a4		2	2353.874	387.884	1386.131	116.295	142.121	4127.889
DGRP-223	223	r	223r	x	a	a4		3	2542.302	254.858	2093.987	86.494	118.278	4891.147
DGRP-223	223	r	223r	x	a	a4		4	2134.627	375.173	1797.64	139.989	110.296	4307.44
DGRP-223	223	r	223r	y	a	a4		1	1992.423	447.96	1884.024	212.442	219.423	4324.407
DGRP-223	223	r	223r	y	a	a4		2	2665.19	561.776	2395.146	222.609	239.554	5622.112
DGRP-223	223	r	223r	y	a	a4		3	2197.096	451.127	2191.605	274.34	296.352	4839.828
DGRP-223	223	r	223r	y	a	a4		4	2773.028	524.466	2341.481	260.656	236.362	5638.975
DGRP-223	223	r	223r	y	a	a4		5				251.249	260.963	4229.694
DGRP-256	256	x	256x	x	a	a4		1	2733.748	371.585	2197.512	179.048	253.683	5302.845
DGRP-256	256	x	256x	x	a	a4		2	2612.767	767.387	1493.042	132.493	244.461	4873.196
DGRP-256	256	x	256x	x	a	a4		3	1834.541	470.595	1482.165	160.662	170.309	3787.301
DGRP-256	256	x	256x	x	a	a4		4	2313.733	351.453	1900.217	178.57	196.599	4565.403
DGRP-256	256	x	256x	x	a	a4		5	2458.007	421.511	1983.023	164.899	266.125	4862.541
DGRP-256	256	x	256x	y	a	a4		1	3091.727	606.205	2905.383	306.08	382.562	6603.315
DGRP-256	256	x	256x	y	a	a4		2	2912.987	672.266	2746.724	353.615	391.393	6331.977
DGRP-256	256	x	256x	y	a	a4		3	3029.117	641.164	2064.85	332.021	368.545	5735.131
DGRP-256	256	x	256x	y	a	a4		4	2837.94	468.465	3276.675	279.528	316.58	6583.08
DGRP-256	256	x	256x	y	a	a4		5	2493.776	728.989	2386.518	252.286	268.354	5609.283
DGRP-280	280	y	280y	x	a	a4		1	2835.383	465.689	2006.738	210.723	250.967	5307.81
DGRP-280	280	y	280y	x	a	a4		2	1699.331	444.367	1819.039	223.273	242.102	3962.737
DGRP-280	280	y	280y	x	a	a4		3	2085.748	359.003	1904.312	292.965	288.902	4349.063
DGRP-280	280	y	280y	x	a	a4		4	1740.555	787.222	2841.62	250.345	299.014	5369.397
DGRP-280	280	y	280y	y	a	a4		1	2758.599	589.56	1841.457	181.221	246.951	5189.616
DGRP-280	280	y	280y	y	a	a4		2	2690.842	461.494	2203.992	228.155	250.127	5356.328
DGRP-280	280	y	280y	y	a	a4		3	3147.504	512.729	2277.298	160.344	206.776	5937.531
DGRP-280	280	y	280y	y	a	a4		4	3108.035	418.473	2598.091	140.872	200.794	6124.599
DGRP-301	301	m	301m	x	a	a4		1	2160.756	282.583	1356.855	127.054	192.075	3800.194
DGRP-301	301	m	301m	x	a	a4		2	1619.246	190.208	1834.56	161.641	174.548	3644.014
DGRP-301	301	m	301m	x	a	a4		3	1829.253	228.024	1143.111	305.798	235.88	3200.388
DGRP-301	301	m	301m	x	a	a4		4	2738.854	479.037	3105.044	141.607	226.809	6322.935
DGRP-301	301	m	301m	y	a	a4		1	2688.697	624.434	1936.133	303.204	318.459	5249.264
DGRP-301	301	m	301m	y	a	a4		2	2467.071	643.054	2083.608	316.621	314.186	5193.733
DGRP-301	301	m	301m	y	a	a4		3	1952.774	477.964	1803.783	251.564	294.328	4234.521
DGRP-301	301	m	301m	y	a	a4		4	2567.826	640.323	2450.278	305.032	350.905	5658.427
DGRP-301	301	m	301m	y	a	a4		5	2430.74	479.498	2088.104	293.873	253.902	4998.342
DGRP-301	301	m	301m	y	a	a4		6	2507.909	536.79	2403.37	455.119	471.943	5448.069
DGRP-318	318	b	318b	x	a	a4		1	1886.436	347.509	1572.115	165.787	205.891	3806.06
DGRP-318	318	b	318b	x	a	a4		2	1816.273	709.154	1666.562	200.715	276.744	4191.989
DGRP-318	318	b	318b	x	a	a4		3	1716.386	343.803	1685.982	201.819	268.389	3746.171
DGRP-318	318	b	318b	x	a	a4		4	1707.98	375.623	1763.951	216.453	231.552	3847.554
DGRP-318	318	b	318b	y	a	a4		1	2454.674	416.981	2327.815	177.766	267.003	5199.47
DGRP-318	318	b	318b	y	a	a4		2	2549.853	323.7	1837.817	216.448	248.77	4711.37
DGRP-318	318	b	318b	y	a	a4		3	2461.742	475.032	2169.223	171.787	205.428	5105.997
DGRP-318	318	b	318b	y	a	a4		4	2183.83	368.213	1537.091	204.295	257.795	4089.134
DGRP-318	318	b	318b	y	a	a4		5	2220.018	564.185	1692.27	210.042	252.3	4476.473
DGRP-319	319	l	319l	x	a	a4		1	1794.106	252.66	1781.666	300.914	350.665	3828.432
DGRP-319	319	l	319l	x	a	a4		2	2665.019	453.518	1888.365	233.863	243.331	5006.902
DGRP-319	319	l	319l	x	a	a4		3	2030.164	273.438	1410.955	231.804	213.534	3714.557
DGRP-319	319	l	319l	x	a	a4		4	2187.791	394.584	1551.051	224.641	290.75	4133.426
DGRP-319	319	l	319l	x	a	a4		5	1984.124	412.751	1607.794	293.67	284.135	4004.669
DGRP-350	350	e	350e	x	a	a4		1	2045.848	487.433	1492.895	209.519	286.324	4026.176
DGRP-350	350	e	350e	x	a	a4		2	2069.177	566.14	1978.524	224.099	217.857	4613.841
DGRP-350	350	e	350e	x	a	a4		3	1746.252	397.873	1775.141	233.353	269.27	3919.266
DGRP-350	350	e	350e	x	a	a4		4	2250.282	416.081	1692.404	218.473	152.643	4358.767
DGRP-350	350	e	350e	x	a	a4		5	2044.491	490.727	1576.828	237.603	318.898	4112.046
DGRP-350	350	e	350e	y	a	a4		1	2138.646	541.195	2449.886	324.734	352.181	5129.727
DGRP-350	350	e	350e	y	a	a4		2	2027.439	561.422	1917.063	286.186	268.497	4505.924
DGRP-350	350	e	350e	y	a	a4		3	2194.414	538.302	2518.854	321.883	215.882	5251.57
DGRP-350	350	e	350e	y	a	a4		4	2448.294	775.063	2100.668	280.305	356.052	5324.025
DGRP-350	350	e	350e	y	a	a4		5	2247.158	522.246	2334.671	242.477	330.306	5104.075
DGRP-352	352	s	352s	x	a	a4		1	2609.25	369.935	1637.759	208.598	233.732	4616.944
DGRP-352	352	s	352s	x	a	a4		2	2857.504	350.974	1759.812	255.262	334.973	4968.29
DGRP-352	352	s	352s	y	a	a4		1	2715.439	442.449	2565.638	332.862	365.171	5723.526
DGRP-352	352	s	352s	y	a	a4		2	2087.069	702.254	2809.004	386.264	359.276	5598.327
DGRP-374	374	m	374m	x	a	a4		1	2581.804	592.792	2366.671	207.601	295.031	5541.267
DGRP-374	374	m	374m	x	a	a4		2	2026.229	517.672	1736.368	254.468	249.6	4280.269
DGRP-374	374	m	374m	x	a	a4		3	1733.428	360.551	1491.506	197.41	192.282	3585.485
DGRP-374	374	m	374m	x	a	a4		4	2203.561	556.578	1975.87	218.861	223.269	4736.009
DGRP-374	374	m	374m	x	a	a4		5	2469.119	428.39	2346.883	178.679	210.493	5244.392
DGRP-374	374	m	374m	y	a	a4		1	3039.851	621.666	4029.282	299.102	230.819	7690.799
DGRP-374	374	m	374m	y	a	a4		2	2506.587	510.505	2490.729	341.215	297.325	5507.821
DGRP-374	374	m	374m	y	a	a4		3	2249.523	370.72	1811.488	296.151	334.975	4431.731
DGRP-379	379	z	379z	x	a	a4		1	1904.596	534.405	1874.523	154.508	111.328	4313.524
DGRP-379	379	z	379z	x	a	a4		2	2278.221	537.61	2574.891	142.544	144.101	5390.722
DGRP-379	379	z	379z	x	a	a4		3	2255.88	320.035	1965.712	118.413	171.327	4541.627
DGRP-379	379	z	379z	x	a	a4		4	1690.843	229.843	1499.927	138.946	141.004	3420.613
DGRP-379	379	z	379z	y	a	a4		1	2178.222	678.148	2517.515	267.18	327.531	5373.885
DGRP-379	379	z	379z	y	a	a4		2	2063.205	458.83	2374.055	264.044	318.753	4896.09
DGRP-379	379	z	379z	y	a	a4		3	1453.429	575.584	2129.997	246.862	357.87	4159.01
DGRP-379	379	z	379z	y	a	a4		4	2508.331	536.506	2404.693	260.198	321.593	5449.53
DGRP-379	379	z	379z	y	a	a4		5	2392.259	612.855	2041.074	216.633	342.905	5046.188
DGRP-382	382	a	382a	x	a	a4		1	2301.963	588.959	2248.413	156.425	219.689	5139.335
DGRP-382	382	a	382a	x	a	a4		2	2350.436	466.551	2377.235	213.688	206.833	5194.222
DGRP-382	382	a	382a	x	a	a4		3	2847.945	428.498	2669.576	172.389	224.505	5946.019
DGRP-382	382	a	382a	x	a	a4		4	2119.905	279.486	1530.747	138.883	161.441	3930.138
DGRP-382	382	a	382a	y	a	a4		1	2727.01	544.148	4326.989	319.826	282.781	7598.147
DGRP-382	382	a	382a	y	a	a4		2	2615.754	441.344	2014.346	288.54	367.848	5071.444
DGRP-382	382	a	382a	y	a	a4		3	2333.308	443.838	2168.542	349.809	371.025	4945.688
DGRP-395	395	p	395p	x	a	a4		1	1980.253	354.346	1731.49	120.853	190.89	4066.089
DGRP-395	395	p	395p	x	a	a4		2	1737.822	357.218	1594.473	112.114	158.849	3689.513
DGRP-395	395	p	395p	x	a	a4		3	1866.155	351.757	2135.571	129.115	201.952	4353.483
DGRP-395	395	p	395p	x	a	a4		4	1684.492	410.102	1816.465	115.429	186.967	3911.059
DGRP-405	405	o	405o	x	a	a4		1	3217.14	393.659	2121.761	75.015	119.401	5732.56
DGRP-405	405	o	405o	x	a	a4		2	2290.926	594.192	1398.318	78.111	108.772	4283.436
DGRP-405	405	o	405o	x	a	a4		3	2892.711	278.319	1607.655	112.234	152.088	4778.685
DGRP-405	405	o	405o	x	a	a4		4	2178.319	254.505	1482.031	84.708	127.624	3914.855
DGRP-405	405	o	405o	y	a	a4		1	3159.777	620.414	1544.544	244.34	292.497	5324.735
DGRP-405	405	o	405o	y	a	a4		2	3233.036	467.141	2579.452	288.51	367.591	6279.629
DGRP-405	405	o	405o	y	a	a4		3	3007.218	788.756	3311.339	331.465	353.545	7107.313
DGRP-406	406	f	406f	x	a	a4		1	2508.917	619.94	2771.595	249.79	331.225	5900.452
DGRP-406	406	f	406f	x	a	a4		2	1772.267	454.791	1784.168	329.314	287.734	4011.226
DGRP-406	406	f	406f	x	a	a4		3	2221.71	511.699	1688.66	291.371	326.363	4422.069
DGRP-406	406	f	406f	x	a	a4		4	2260.113	617.376	2175.231	280.856	319.914	5052.72
DGRP-406	406	f	406f	x	a	a4		5	2083.571	478.945	2180.983	182.683	249.34	4743.499
DGRP-406	406	f	406f	y	a	a4		1	2505.904	744.48	2809.977	399.149	333.533	6060.361
DGRP-406	406	f	406f	y	a	a4		2	2605.142	865.896	2940.02	287.281	322.375	6411.058
DGRP-406	406	f	406f	y	a	a4		3	3116.996	774.648	2327.765	229.343	349.533	6219.409
DGRP-406	406	f	406f	y	a	a4		4	3060.247	685.371	3044.442	273.579	311.578	6790.06
DGRP-406	406	f	406f	y	a	a4		5	2225.926	613.442	2243.682	286.308	239.437	5083.05
DGRP-409	409	z	409z	x	a	a4		1	1437.03	342.559	939.981	200.343	137.929	2719.57
DGRP-409	409	z	409z	x	a	a4		2	2082.759	586.504	1493.533	161.543	159.041	4162.796
DGRP-409	409	z	409z	x	a	a4		3	2298.597	377.241	1727.993	175.824	147.082	4403.831
DGRP-409	409	z	409z	x	a	a4		4	2169.143	479.198	1793.703	131.819	143.539	4442.044
DGRP-409	409	z	409z	x	a	a4		5	2106.136	381.807	1734.728	239.989	228.327	4222.671
DGRP-409	409	z	409z	y	a	a4		1	2739.029	747.64	2033.077	258.839	269.082	5519.746
DGRP-409	409	z	409z	y	a	a4		2	2300.433	737.757	2276.175	311.852	256.09	5314.365
DGRP-409	409	z	409z	y	a	a4		3	2723.247	745.932	3075.62	294.011	241.323	6544.799
DGRP-409	409	z	409z	y	a	a4		4	2682.264	406.028	2423.735	299.099	257.859	5512.027
DGRP-409	409	z	409z	y	a	a4		5	2504.525	712.385	2765.726	300.62	315.985	5982.636
DGRP-427	427	b	427b	x	a	a4		1	2634.818	503.175	2007.065	271.554	295.036	5145.058
DGRP-427	427	b	427b	x	a	a4		2	2293.389	367.171	1551.159	232.769	245.157	4211.719
DGRP-427	427	b	427b	y	a	a4		1	2677.079	434.661	2233.47	300.603	374.923	5345.21
DGRP-427	427	b	427b	y	a	a4		2	2907.531	381.066	2360.356	328.054	216.092	5648.953
DGRP-427	427	b	427b	y	a	a4		3	2601.002	742.545	2221.676	343.225	326.161	5565.223
DGRP-427	427	b	427b	y	a	a4		4	2552.651	466.653	2049.645	432.096	357.464	5068.949
DGRP-427	427	b	427b	y	a	a4		5	2514.038	486.621	2060.198	283.196	294.167	5060.857
DGRP-491	491	x	491x	x	a	a4		1	1653.551	514.608	3731.869	172.919	410.143	5900.028
DGRP-491	491	x	491x	x	a	a4		2	2189.3	608.014	2662.764	190.858	217.718	5460.078
DGRP-491	491	x	491x	x	a	a4		3	2062.646	547.125	3016.848	201.294	262.46	5626.619
DGRP-491	491	x	491x	x	a	a4		4	3021.626	483.987	2447.34	236.617	303.24	5952.953
DGRP-491	491	x	491x	x	a	a4		5	1855.806	445.998	1889.608	221.667	198.667	4191.412
DGRP-491	491	x	491x	x	a	a4		6	2366.097	440.224	2410.35	217.619	326.42	5216.671
DGRP-491	491	x	491x	y	a	a4		1	3037.772	566.358	2430.637	294.013	407.64	6034.767
DGRP-491	491	x	491x	y	a	a4		2	2056.771	668.804	3313.99	327.941	405.6	6039.565
DGRP-491	491	x	491x	y	a	a4		3	2398.558	628.391	3200.957	281.692	392.613	6227.906
DGRP-505	505	r	505r	y	a	a4		1	2463.515	901.414	2226.043	272.837	290.02	5590.972
DGRP-505	505	r	505r	y	a	a4		2	2396.63	489.54	2044.289	279.06	317.368	4930.459
DGRP-530	530	h	530h	x	a	a4		1	1912.863	359.477	1155.933	142.56	161.793	3428.273
DGRP-530	530	h	530h	x	a	a4		2				155.345	171.636
DGRP-530	530	h	530h	x	a	a4		3				125.858	114.63
DGRP-530	530	h	530h	x	a	a4		4				122.23	120.735
DGRP-530	530	h	530h	y	a	a4		1	2204.281	447.705	1903.195	330.306	209.686	4555.181
DGRP-530	530	h	530h	y	a	a4		2	1800.188	542.446	1617.953	302.45	241.5	3960.587
DGRP-530	530	h	530h	y	a	a4		3	2151.853	335.966	2185.16	235.616	239.408	4672.979
DGRP-530	530	h	530h	y	a	a4		4	2456.948	509.818	1830.388	279.364	263.693	4797.154
DGRP-530	530	h	530h	y	a	a4		5				163.849	213.084	4557.787
DGRP-584	584	s	584s	x	a	a4		1	1601.234	355.325	1394.117	89.608	110.268	3350.676
DGRP-584	584	s	584s	x	a	a4		2	2080.206	310.742	1539.563	126.573	136.868	3930.511
DGRP-584	584	s	584s	y	a	a4		1	2237.892	572.812	2541.301	392.136	315.729	5352.005
DGRP-584	584	s	584s	y	a	a4		2				339.933
DGRP-630	630	w	630w	x	a	a4		1	2455.041	733.623	1925.955	155.863	228.118	5114.619
DGRP-630	630	w	630w	x	a	a4		2	2262.167	518.554	2111.418	179.778	264.135	4892.139
DGRP-630	630	w	630w	x	a	a4		3	2311.21	372.118	1999.913	157.607	264.481	4683.241
DGRP-630	630	w	630w	x	a	a4		4	2244.65	512	2187.888	199.765	282.035	4944.538
DGRP-630	630	w	630w	x	a	a4		5	2704.078	535.37	2214.621	191.946	228.841	5454.069
DGRP-630	630	w	630w	x	a	a4		6	2650.143	540.193	2254.606	167.249	240.808	5444.942
DGRP-630	630	w	630w	y	a	a4		1	2633.868	642.245	2830.15	275.687	354.857	6106.263
DGRP-630	630	w	630w	y	a	a4		2	2831.941	936.512	2921.867	252.161	316.317	6690.32
DGRP-630	630	w	630w	y	a	a4		3	2585.157	697.076	2652.275	319.561	355.221	5934.508
DGRP-630	630	w	630w	y	a	a4		4	2549.854	904.368	2775.851	277.465	343.163	6230.073
DGRP-630	630	w	630w	y	a	a4		5	2652.619	676.7	2535.72	185.419	249.9	5865.039
DGRP-716	716	i	716i	x	a	a4		1	1739.312	296.924	2026	89.823	162.535	4062.236
DGRP-716	716	i	716i	x	a	a4		2	1985.242	392.581	1051.285	108.192	117.652	3429.108
DGRP-716	716	i	716i	x	a	a4		3	2536.66	247.197	1708.929	92.573	117.967	4492.786
DGRP-716	716	i	716i	y	a	a4		1	2171.282	461.601	2146.643	331.318	252.3	4779.526
DGRP-716	716	i	716i	y	a	a4		2	2202.521	436.991	2347.278	286.808	270.93	4986.79
DGRP-716	716	i	716i	y	a	a4		3	2119.944	415.919	2107.236	220.727	279.239	4643.099
DGRP-716	716	i	716i	y	a	a4		4	2673.223	411.514	3344.247	275.048	266.934	6428.984
DGRP-716	716	i	716i	y	a	a4		5	1965.774	428.748	2358.77	328.515	364.947	4753.292
DGRP-732	732	k	732k	x	a	a4		1	2147.668	460.216	1886.076	230.7	262.962	4493.96
DGRP-732	732	k	732k	x	a	a4		2	2495.995	362.212	1959.065	211.047	230.21	4817.272
DGRP-732	732	k	732k	x	a	a4		3	2070.361	444.469	1676.67	216.633	301.35	4191.5
DGRP-732	732	k	732k	x	a	a4		4	1797.338	347.736	1209.084	221.105	263.173	3354.158
DGRP-732	732	k	732k	y	a	a4		1	1588.932	250.69	792.602	226.908	388.202	2632.224
DGRP-732	732	k	732k	y	a	a4		2	2395.628	529.417	1967.357	287.833	337.497	4892.402
DGRP-732	732	k	732k	y	a	a4		3	2643.756	594.784	1444.398	204.783	385.251	4682.938
DGRP-737	737	k	737k	x	a	a4		1	2260.751	387.936	2326.475	174.401	234.073	4975.162
DGRP-737	737	k	737k	x	a	a4		2	1557.549	408.068	1981.177	131.018	205.405	3946.794
DGRP-737	737	k	737k	x	a	a4		3	1570.127	386.859	2264.479	178.727	247.918	4221.465
DGRP-737	737	k	737k	x	a	a4		4	1996.803	360.469	2280.429	152.471	278.135	4637.701
DGRP-737	737	k	737k	x	a	a4		5	1799.512	479.136	2683.313	139.144	185.232	4961.961
DGRP-737	737	k	737k	y	a	a4		1	2131.424	436.118	2506.076	298.926	262.383	5073.618
DGRP-737	737	k	737k	y	a	a4		2	2254.83	565.327	3189.694	281.745	369.865	6009.851
DGRP-737	737	k	737k	y	a	a4		3	1943.783	368.137	2753.288	271.166	374.335	5065.208
DGRP-737	737	k	737k	y	a	a4		4	1750.23	742.422	2638.344	250.733	321.456	5130.996
DGRP-737	737	k	737k	y	a	a4		5	2342.883	744.153	3578.316	306.863	239.934	6665.352
DGRP-774	774	m	774m	x	a	a4		1	2069.045	500.874	2095.012	173.538	197.764	4664.931
DGRP-774	774	m	774m	x	a	a4		2	2444.242	328.242	1960.363	208.515	217.223	4732.847
DGRP-774	774	m	774m	x	a	a4		3	1967.047	571.765	1589.981	143.766	188.74	4128.793
DGRP-774	774	m	774m	x	a	a4		4	2494.905	416.094	2189.905	134.905	133.225	5100.904
DGRP-774	774	m	774m	x	a	a4		5	2166.311	489.502	2072.549	136.705	207.831	4728.362
DGRP-774	774	m	774m	y	a	a4		1	3190.392	580.175	2135.736	388.973	417.895	5906.303
DGRP-774	774	m	774m	y	a	a4		2	2365.418	544.441	2151.607	284.814	410.828	5061.466
DGRP-774	774	m	774m	y	a	a4		3	2498.288	639.266	2242.395	256.276	252.202	5379.949
DGRP-774	774	m	774m	y	a	a4		4				285.607	327.655
DGRP-787	787	q	787q	x	a	a4		1	2406.711	376.219	1665.996	144.181	147.042	4448.926
DGRP-787	787	q	787q	x	a	a4		2	2361.459	433.832	2127.512	88.114	122.477	4922.803
DGRP-787	787	q	787q	x	a	a4		3	2158.5	349.332	1914.264	98.649	91.4	4422.096
DGRP-787	787	q	787q	x	a	a4		4	2173.905	299.068	1819.678	78.954	121.081	4292.651
DGRP-787	787	q	787q	x	a	a4		5	2454.196	292.8	1432.837	126.729	110.291	4179.833
DGRP-787	787	q	787q	y	a	a4		1	2219.713	398.333	2661.359	283.865	235.87	5279.405
DGRP-787	787	q	787q	y	a	a4		2	2540.774	524.505	2652.67	248.331	305.698	5717.949
DGRP-787	787	q	787q	y	a	a4		3	2300.981	634.76	3182.009	322.864	316.653	6117.75
DGRP-787	787	q	787q	y	a	a4		4	2466.301	461.893	3713.657	317.666	271.995	6641.851
DGRP-787	787	q	787q	y	a	a4		5	2516.172	484.66		342.944	244.406
DGRP-796	796	r	796r	x	a	a4		1	2679.955	493.734	2387.605	201.152	321.951	5561.294
DGRP-796	796	r	796r	x	a	a4		2	2484.65	402.891	2391.993	211.684	279.55	5279.534
DGRP-796	796	r	796r	x	a	a4		3	1873.034	551.029	1871.995	277.904	223.046	4296.058
DGRP-796	796	r	796r	x	a	a4		4	2575.046	416.13	1980.08	178.359	284.194	4971.256
DGRP-796	796	r	796r	x	a	a4		5	2704.848	385.591	2114.566	201.759	311.44	5205.005
DGRP-796	796	r	796r	x	a	a4		6	2905.114	498.922	2546.699	195.32	233.14	5950.735
DGRP-796	796	r	796r	y	a	a4		1	2707.826	480.547	2199.876	270.054	318.659	5388.249
DGRP-796	796	r	796r	y	a	a4		2	3049.608	435.798	2950.163	346.513	381.982	6435.569
DGRP-796	796	r	796r	y	a	a4		3	3708.255	737.089	2441.589	284.071	315.566	6886.933
DGRP-796	796	r	796r	y	a	a4		4	3078.865	583.775	2606.423	329.913	321.196	6269.063
DGRP-796	796	r	796r	y	a	a4		5	3286.395	639.574	2984.271	319.102	380.564	6910.24
DGRP-810	810	x	810x	x	a	a4		1	2095.248	292.03	1751.712	127.454	179.74	4138.99
DGRP-810	810	x	810x	x	a	a4		2	2299.501	416.895	1884.984	125.979	177.035	4601.38
DGRP-810	810	x	810x	x	a	a4		3	1929.397	361.351	1879.864	136.354	163.192	4170.612
DGRP-810	810	x	810x	x	a	a4		4	2194.092	354.891	1565.009	142.365	199.168	4113.992
DGRP-810	810	x	810x	y	a	a4		1	2969.944	402.372	2147.056	169.226	267.556	5519.372
DGRP-810	810	x	810x	y	a	a4		2	2636.744	448.826	2017.466	165.799	258.579	5103.036
DGRP-810	810	x	810x	y	a	a4		3	2414.377	541.871	2449.712	209.118	343.166	5405.96
DGRP-810	810	x	810x	y	a	a4		4	2752.302	615.662	2424.956	216.819	300.872	5792.92
DGRP-810	810	x	810x	y	a	a4		5	2879.084	440.6	2174.346	159.003	215.187	5494.03
DGRP-818	818	z	818z	x	a	a4		1	2106.526	525.058	1757.479	213.987	264.872	4389.063
DGRP-818	818	z	818z	x	a	a4		2	1988.497	449.959	1821.998	148.078	236.284	4260.454
DGRP-818	818	z	818z	x	a	a4		3	1945.604	481.71	1939.766	216.383	350.217	4367.08
DGRP-818	818	z	818z	y	a	a4		1	1852.007	434.541	1893.756	273.544	394.343	4180.304
DGRP-818	818	z	818z	y	a	a4		2	1910.379	626.14	2174.895	398.601	425.154	4711.414
DGRP-818	818	z	818z	y	a	a4		3	1804.659	626.193	2253.089	375.776	385.996	4683.941
DGRP-849	849	f	849f	x	a	a4		1	2502.454	242.415	1787.528	92.837	78.756	4532.397
DGRP-849	849	f	849f	x	a	a4		2	2075.77	499.337	1354.903	94.146	139.935	3930.01
DGRP-849	849	f	849f	x	a	a4		3	2087.34	395.377	1766.613	91.362	99.755	4249.33
DGRP-849	849	f	849f	y	a	a4		1	2409.49	515.055	2283.833	262.987	279.338	5208.378
DGRP-849	849	f	849f	y	a	a4		2	2277.378	476.072	2333.719	289.976	338.124	5087.169
DGRP-849	849	f	849f	y	a	a4		3	2522.021	575.537	2546.742	281.4	320.202	5644.3
DGRP-849	849	f	849f	y	a	a4		4	2673.867	434.94	2584.35	313.819	304.187	5693.157
DGRP-849	849	f	849f	y	a	a4		5	2689.182	401.04	2165.748	268.955	277.125	5255.97
DGRP-882	882	m	882m	x	a	a4		1	1934.556	223.867	1208.73	212.786	188.76	3367.153
DGRP-882	882	m	882m	x	a	a4		2	2159.05	623.696	1477.148	165.798	182.725	4259.894
DGRP-882	882	m	882m	x	a	a4		3	1752.365	315.979	1070.094	94.5	177.855	3138.438
DGRP-882	882	m	882m	x	a	a4		4	2269.134	303.909	1404.489	159.076	209.215	3977.532
DGRP-882	882	m	882m	x	a	a4		5	2164.285	399.748	2029.888	165.665	201.222	4593.921
DGRP-882	882	m	882m	x	a	a4		6	1786.637	335.441	1491.195	178.023	181.793	3613.273
DGRP-882	882	m	882m	y	a	a4		1	2873.143	415.688	2213.532	188.548	216.833	5502.363
DGRP-882	882	m	882m	y	a	a4		2	2442.411	470.437	2385.312	170.41	182.68	5298.16
DGRP-882	882	m	882m	y	a	a4		3	2494.521	469.233	2191.896	166.567	177.732	5155.65
DGRP-884	884	n	884n	x	a	a4		1	2571.939	458.819	1805.027	199.455	265.624	4835.785
DGRP-884	884	n	884n	x	a	a4		2	2537.466	398.82	2040.57	195.492	220.127	4976.856
DGRP-884	884	n	884n	x	a	a4		3	2554.222	407.282	1850.515	193.576	283.595	4812.019
DGRP-884	884	n	884n	x	a	a4		4	3098.966	511.649	1382.099	209.463	231.204	4992.714
DGRP-884	884	n	884n	y	a	a4		1	2269.253	430.428	2301.18	239.753	214.652	5000.861
DGRP-884	884	n	884n	y	a	a4		2	2265.567	588.703	2437.858	262.139	299.42	5292.128
DGRP-884	884	n	884n	y	a	a4		3	2564.035	536.359	2006.089	233.52	260.263	5106.483
DGRP-884	884	n	884n	y	a	a4		4	2471.971	383.437	1931.355	230.919	290.177	4786.763
DGRP-884	884	n	884n	y	a	a4		5	2649.435	487.534	2664.58	224.456	262.989	5801.549
DGRP-894	894	p	894p	x	a	a4		1	3133.231	428.791	2047.281	204.653	200.358	5609.303
DGRP-894	894	p	894p	x	a	a4		2	2685.667	574.355	1982.263	161.788	224.88	5242.285
DGRP-894	894	p	894p	x	a	a4		3	2812.707	521.775	2044.874	234.586	249.74	5379.356
DGRP-894	894	p	894p	y	a	a4		1	3972.649	559.175	3056.251	274.053	369.195	7588.075
DGRP-894	894	p	894p	y	a	a4		2	3256.173	729.695	3588.443	352.456	379.582	7574.311
DGRP-894	894	p	894p	y	a	a4		3	3212.223	409.067	2553.903	268.986	362.464	6175.193
DGRP-894	894	p	894p	y	a	a4		4	2817.535	782.609	3803.263	345.27	311.996	7403.407
DGRP-907	907	s	907s	x	a	a4		1	2080.136	230.737	1508.556	77.3	134.783	3819.429
DGRP-907	907	s	907s	x	a	a4		2	1929.342	246.242	1159.137	74.43	84.803	3334.721
DGRP-907	907	s	907s	x	a	a4		3	1676.114	297.182	867.042	91.687	113.024	2840.338
DGRP-907	907	s	907s	x	a	a4		4	1864.005	239.003	1452.156	100.512	113.175	3555.164
DGRP-907	907	s	907s	x	a	a4		5	2098.459	333.809	1273.431	111.304	137.493	3705.699
DGRP-907	907	s	907s	y	a	a4		1	2242.671	390.085	1741.119	190.014	154.475	4373.875
DGRP-907	907	s	907s	y	a	a4		2	1876.314	498.029	1775.918	247.091	193.44	4150.261
DGRP-907	907	s	907s	y	a	a4		3	1218.744	573.111	1544.676	249.332	261.227	3336.531
DGRP-907	907	s	907s	y	a	a4		4	1906.693	376.725	1752.01	291.541	293.476	4035.428
DGRP-907	907	s	907s	y	a	a4		5	2169.399	420.738	1795.157	229.934	181.221	4385.294
DGRP-395	395	p	395p	y	a	a4		1	1907	426	1987	207	250	4320
DGRP-395	395	p	395p	y	a	a4		2	2214	634	2291	263	235	5139
DGRP-395	395	p	395p	y	a	a4		3	1919	460	1664	259	256	4043
DGRP-395	395	p	395p	y	a	a4		4				190	188	5014
DGRP-395	395	p	395p	y	a	a4		5	2479	594	1993	163	272	5066
DGRP-75	75	a	75a	x	a	a5		1	2149.741	673.881	1585.464	113.123	121.804	4409.086
DGRP-75	75	a	75a	x	a	a5		2	2086.143	353.472	1897.511	115.672	112.269	4337.126
DGRP-75	75	a	75a	x	a	a5		3	2017.893	328.024	1778.672	90.223	128.155	4124.589
DGRP-75	75	a	75a	x	a	a5		4	1990.836	316.802	1718.077	108.063	121.572	4025.715
DGRP-75	75	a	75a	y	a	a5		1	2542.134	664.932	2970.574	288.543	301.99	6177.64
DGRP-75	75	a	75a	y	a	a5		2	2417.658	419.447	2775.082	239.144	194.182	5612.187
DGRP-75	75	a	75a	y	a	a5		3	2500.108	499.654	2674.154	319.784	285.85	5673.916
DGRP-75	75	a	75a	y	a	a5		4	2211.646	588.194	3201.626	300.871	274.304	6001.466
DGRP-88	88	b	88b	x	a	a5		1	1978.698	552.637	2194.032	172.304	184.454	4725.367
DGRP-88	88	b	88b	x	a	a5		2	2210.141	472.917	2511.429	117.633	157.896	5194.487
DGRP-88	88	b	88b	x	a	a5		3	1815.706	472.729	2112.025	163.471	235.2	4400.46
DGRP-88	88	b	88b	x	a	a5		4	2336.118	422.746	2209.629	127.738	254.367	4968.493
DGRP-88	88	b	88b	x	a	a5		5	2223.131	396.521	2492.365	137.708	227.701	5112.017
DGRP-88	88	b	88b	y	a	a5		1	2036.479	492.894	2253.458	219.039	360.763	4782.831
DGRP-88	88	b	88b	y	a	a5		2	2114.152	606.922	2227.477	170.257	311.702	4948.551
DGRP-88	88	b	88b	y	a	a5		3	2293.96	375.552	2132.589	159.624	216.482	4802.101
DGRP-88	88	b	88b	y	a	a5		4	2663.612	547.096	2302.604	166.447	231.271	5513.312
DGRP-88	88	b	88b	y	a	a5		5	2988.94	543.73	2663.229	178.688	327.735	6195.899
DGRP-105	105	b	105b	x	a	a5		1	2919.295	423.155	1759.758	118.196	171.738	5102.208
DGRP-105	105	b	105b	x	a	a5		2	2267.591	370.205	1859.44	156.222	173.425	4497.236
DGRP-105	105	b	105b	x	a	a5		3	2216.125	444.393	1500.771	126.573	103.331	4161.289
DGRP-105	105	b	105b	x	a	a5		4	2319.119	365.377	1632.475	138.314	184.835	4316.971
DGRP-105	105	b	105b	x	a	a5		5	1906.763	535.06	2148.312	152.056	172.435	4590.135
DGRP-105	105	b	105b	y	a	a5		1	2530.909	497.995	1970.686	298.79	247.525	4999.59
DGRP-105	105	b	105b	y	a	a5		2	2229.498	565.593	2080.57	265.42	276.152	4875.661
DGRP-105	105	b	105b	y	a	a5		3	2354.536	471.064	2215.795	286.745	343.545	5041.395
DGRP-105	105	b	105b	y	a	a5		4	2464.544	480.349	2149.323	305.576	257.193	5094.216
DGRP-105	105	b	105b	y	a	a5		5	2224.274	535.588	2060.09	281.906	353.113	4819.952
DGRP-138	138	g	138g	x	a	a5		1	2591.757	293.528	1565.781	84.803	89.608	4451.066
DGRP-138	138	g	138g	x	a	a5		2	2114.74	432.081	1618.145	93.455	163.196	4164.966
DGRP-138	138	g	138g	x	a	a5		3	1402.481	330.178	1880.132	132.589	148.388	3612.791
DGRP-138	138	g	138g	x	a	a5		4	2120.229	213.859	1393.648	86.732	111.983	3727.736
DGRP-138	138	g	138g	y	a	a5		1	2120.757	454.958	2107.245	252.48	261.65	4682.96
DGRP-138	138	g	138g	y	a	a5		2	1892.384	574.356	1907.441	334.916	371.976	4374.181
DGRP-138	138	g	138g	y	a	a5		3	2082.151	503.717	2381.237	324.68	287.366	4967.105
DGRP-142	142	h	142h	x	a	a5		1	2866.921	419.318	2305.367	143.485	148.784	5591.606
DGRP-142	142	h	142h	x	a	a5		2	2408.856	487.794	2012.993	107.663	138.831	4909.643
DGRP-142	142	h	142h	x	a	a5		3	2369.493	546.804	1853.176	131.305	140.988	4769.473
DGRP-142	142	h	142h	x	a	a5		4	2110.518	381.814	2069.915	149.134	126.949	4562.247
DGRP-142	142	h	142h	y	a	a5		1	2400.945	361.991	1817.756	210.95	194.282	4580.692
DGRP-142	142	h	142h	y	a	a5		2	2481.148	400.591	1755.957	216.688	199.54	4637.696
DGRP-142	142	h	142h	y	a	a5		3	2872.296	437.02	2249.497	155.862	202.14	5558.813
DGRP-142	142	h	142h	y	a	a5		4	2779.756	443.243	2322.062	173.114	141.41	5545.061
DGRP-217	217	q	217q	x	a	a5		1	1884.027	404.957	1908.719	244.982	277.14	4197.703
DGRP-217	217	q	217q	x	a	a5		2	1994.147	455.699	1803.829	216.744	300.307	4253.675
DGRP-217	217	q	217q	x	a	a5		3	1846.281	466.17	1948.752	258.469	315.328	4261.203
DGRP-217	217	q	217q	x	a	a5		4	1919.973	390.941	1815.021	195.515	257.51	4125.935
DGRP-217	217	q	217q	y	a	a5		1	1975.524	440.502	2024.812	340.224	384.305	4440.838
DGRP-217	217	q	217q	y	a	a5		2	2450.744	785.744	2184.474	388.192	374.024	5420.962
DGRP-217	217	q	217q	y	a	a5		3	1981.501	454.352	1997.673	291.43	309.732	4433.526
DGRP-217	217	q	217q	y	a	a5		4	1830.106	398.933	2273.308	196.558	338.615	4502.347
DGRP-217	217	q	217q	y	a	a5		5	1632.651	441.416	2303.12	252.45	323.737	4377.187
DGRP-237	237	v	237v	x	a	a5		1	1586.159	390.702	2187.888	141.79	219.091	4164.749
DGRP-237	237	v	237v	x	a	a5		2	1585.904	415.799	2050.415	162.769	220.804	4052.118
DGRP-237	237	v	237v	x	a	a5		3	1489.899	397.4	1633.352	103.801	163.245	3520.651
DGRP-237	237	v	237v	x	a	a5		4	1893.244	359.113	2119.012	111.394	246.912	4371.369
DGRP-237	237	v	237v	y	a	a5		1	1904.326	612.501	1856.67	168.297	240.052	4373.497
DGRP-237	237	v	237v	y	a	a5		2	1997.775	408.169	2261.553	208.351	318.007	4667.497
DGRP-237	237	v	237v	y	a	a5		3	1907.051	405.749	1752.068	169.239	256.934	4064.868
DGRP-237	237	v	237v	y	a	a5		4	1873.438	470.17	1664.171	182.607	306.159	4007.779
DGRP-303	303	n	303n	x	a	a5		1	2243.828	539.759	1737.84	107.904	134.393	4521.427
DGRP-303	303	n	303n	x	a	a5		2	1791.509	312.911	1348.963	101.817	149.68	3453.383
DGRP-303	303	n	303n	x	a	a5		3	1837.714	285.832	1779.031	130.507	200.585	3902.577
DGRP-303	303	n	303n	x	a	a5		4	1822.434	309.43	1138.8	116.177	102.909	3270.664
DGRP-303	303	n	303n	y	a	a5		1	2173.655	317.562	1607.673	103.736	185.499	4098.89
DGRP-303	303	n	303n	y	a	a5		2	2247.854	529.347	1904.478	145.204	243.485	4681.679
DGRP-303	303	n	303n	y	a	a5		3	2324.81	431.476	1587.677	200.821	235.202	4343.963
DGRP-303	303	n	303n	y	a	a5		4	1966.801	278.406	1927.912	166.909	158.022	4173.119
DGRP-303	303	n	303n	y	a	a5		5	2146.766	481.53	1849.179	186.782	192.973	4477.475
DGRP-310	310	y	310y	x	a	a5		1	2167.164	234.387	1579.634	145.204		3981.185
DGRP-310	310	y	310y	x	a	a5		2	2088.117	247.374	1713.451	141.061	196.984	4048.942
DGRP-310	310	y	310y	x	a	a5		3	2080.849	343.27	1733.663	147.017	280.2	4157.782
DGRP-310	310	y	310y	x	a	a5		4	2008.612	266.804	1504.874	146.726	290.438	3780.29
DGRP-310	310	y	310y	x	a	a5		5	1594.078	293.912	1349.788	212.2	233.431	3237.778
DGRP-310	310	y	310y	y	a	a5		1	2974.393	850.632	2790.4	299.745	253.503	6615.425
DGRP-310	310	y	310y	y	a	a5		2	2971.99	525.782	2589.112	349.014	327.11	6086.884
DGRP-310	310	y	310y	y	a	a5		3	2155.837	574.686	2894.614	340.213	275.44	5625.137
DGRP-320	320	d	320d	x	a	a5		1	2145.65	257.174	2034.735	132.046	182.41	4437.559
DGRP-320	320	d	320d	x	a	a5		2	2373.152	322.26	1967.3	101.134	124.977	4662.712
DGRP-320	320	d	320d	x	a	a5		3	2027.26	484.985	1944.082	163.61	124.106	4456.327
DGRP-320	320	d	320d	x	a	a5		4	2021.799	293.255	1944.462	113.226	154.987	4259.516
DGRP-320	320	d	320d	x	a	a5		5	2185.341	340.734	2278.036	132.046	181.105	4804.111
DGRP-320	320	d	320d	y	a	a5		1	2036.69	457.119	2243.662	300.726	316.366	4737.471
DGRP-320	320	d	320d	y	a	a5		2	2934.051	561.007	2172.36	253.081	277.192	5667.418
DGRP-320	320	d	320d	y	a	a5		3	1971.245	415.928	2004.791	225.577	290.704	4391.964
DGRP-320	320	d	320d	y	a	a5		4	2257.093	523.193	1942.739	244.772	322.665	4723.025
DGRP-320	320	d	320d	y	a	a5		5	2636.269	500.37	2318.592	270.698	256.531	5455.231
DGRP-332	332	d	332d	x	a	a5		1	2290.928	639.112	2688.827	241.749	315.473	5618.867
DGRP-332	332	d	332d	x	a	a5		2	2532.452	433.011	3095.749	270.923	223.194	6061.212
DGRP-332	332	d	332d	x	a	a5		3	2715.812	596.945	1962.161	193.223	244.9	5274.918
DGRP-332	332	d	332d	x	a	a5		4	2141.09	619.358	1970.771	323.796	375.736	4731.219
DGRP-332	332	d	332d	y	a	a5		1	2366.542	737.653	2201.636	333.985	437.051	5305.831
DGRP-332	332	d	332d	y	a	a5		2	2370.19	531.816	2859.619	425.965	419.047	5761.625
DGRP-332	332	d	332d	y	a	a5		3	2792.055	662.833	2240.401	361.241	382.181	5695.289
DGRP-335	335	t	335t	x	a	a5		1						3794.559
DGRP-335	335	t	335t	x	a	a5		2						4038.215
DGRP-335	335	t	335t	x	a	a5		3						3999.899
DGRP-335	335	t	335t	y	a	a5		1	2215.033	409.223	1998.208	194.45	263.775	4622.464
DGRP-335	335	t	335t	y	a	a5		2	2191.121	386.174	2017.466	327.869	340.315	4594.761
DGRP-335	335	t	335t	y	a	a5		3	2310.821	448.93	2251.269	271.01	304.372	5011.02
DGRP-335	335	t	335t	y	a	a5		4	2531.729	528.616	2126.004	212.363	245.381	5186.349
DGRP-335	335	t	335t	y	a	a5		5	2321.725	529.046	2285.642	295.078	288.122	5136.413
DGRP-336	336	c	336c	x	a	a5		1	2623.786	373.162	1571.312	200.605	191.951	4568.26
DGRP-336	336	c	336c	x	a	a5		2	2174.2	392.202	1300.944	196.914	207.95	3867.346
DGRP-336	336	c	336c	x	a	a5		3	2175.684	437.36	1601.69	150	183.709	4214.734
DGRP-336	336	c	336c	x	a	a5		4	2209.892	457.178	1411.799	217.204	223.327	4078.869
DGRP-336	336	c	336c	x	a	a5		5	2137.744	434.372	1657.815	198.442	197.152	4229.931
DGRP-336	336	c	336c	y	a	a5		1	2761.315	476.632	1982.524	267.624	298.918	5220.471
DGRP-336	336	c	336c	y	a	a5		2	2068.387	879.913	2267.051	399.084	324.19	5215.351
DGRP-355	355	y	355y	x	a	a5		1	2221.801	501.68	1758.922	111.231	120.008	4482.403
DGRP-358	358	v	358v	x	a	a5		1	2170.499	194.18	1589.303	125.667	110.07	3953.982
DGRP-358	358	v	358v	y	a	a5		1	2446.089	501.309	2140.706	261.014	255.638	5088.104
DGRP-358	358	v	358v	y	a	a5		2	2174.16	689.851	2501.391	248.606	278.611	5365.402
DGRP-358	358	v	358v	y	a	a5		3	1781.577	718.652	2702.213	272.218	237.535	5202.442
DGRP-358	358	v	358v	y	a	a5		4	2364.322	550.673	2502.641	212.054	282.974	5417.636
DGRP-358	358	v	358v	y	a	a5		5	2257.621	599.343	2139.963	269.474	267.219	4996.927
DGRP-391	391	z	391z	x	a	a5		1	1789.693	387.917	2076.954	89.34	148.535	4254.564
DGRP-391	391	z	391z	x	a	a5		2	1769.765	553.328	2486.478	103.173	80.514	4809.571
DGRP-391	391	z	391z	x	a	a5		3	2396	446.331	1261.499	105.727	121.797	4103.83
DGRP-391	391	z	391z	x	a	a5		4	1999.759	413.017	1771.427	103.258	169.475	4184.203
DGRP-391	391	z	391z	y	a	a5		1	2682.914	453.239	2470.863	127.938	155.672	5607.016
DGRP-391	391	z	391z	y	a	a5		2	2691.497	537.691	2574.441	181.704	291.028	5803.629
DGRP-391	391	z	391z	y	a	a5		3	2527.639	525.691	3294.468	222.283	225.921	6347.798
DGRP-391	391	z	391z	y	a	a5		4	2027.304	389.286	2282.547	207.801	247.751	4699.137
DGRP-761	761	o	761o	x	a	a5		1	2396.113	620.212	1767.184	241.068	381.662	4783.509
DGRP-761	761	o	761o	x	a	a5		2	2165.326	370.95	1602.084	197.142	288.216	4138.36
DGRP-761	761	o	761o	x	a	a5		3	2440.337	576.023	1705.309	299.282	280.621	4721.669
DGRP-761	761	o	761o	x	a	a5		4	1869.995	435.05	1477.283	299.246	256.701	3782.328
DGRP-761	761	o	761o	x	a	a5		5						3949.714
DGRP-761	761	o	761o	y	a	a5		1	3166.216	554.303	2158.309	212.598	333.952	5878.828
DGRP-761	761	o	761o	y	a	a5		2	4545.677	4014.628	5288.153			4545.677
DGRP-761	761	o	761o	y	a	a5		3						4014.628
DGRP-761	761	o	761o	y	a	a5		4						5288.153
DGRP-857	857	j	857j	x	a	a5		1	2232.166	628.84	2049.353	195.801	190.495	4910.359
DGRP-857	857	j	857j	x	a	a5		2	2297.978	539.249	2000.95	182.217	183.585	4838.177
DGRP-857	857	j	857j	x	a	a5		3	1779.102	368.673	2330.25	147.663	163.669	4478.025
DGRP-857	857	j	857j	x	a	a5		4	2473.205	515.204	2058.031	169.099	206.317	5046.44
DGRP-857	857	j	857j	x	a	a5		5	2170.598	390.63	2040.804	136.228	192.11	4602.032
DGRP-857	857	j	857j	x	a	a5		6	2227.419	473.736	2177.487	162.145	173.448	4878.642
DGRP-857	857	j	857j	y	a	a5		1	2276.879	514.701	2450.378	255.717	304.467	5241.958
DGRP-857	857	j	857j	y	a	a5		2	2304.453	415.031	2039.589	167.934	220.25	4759.073
DGRP-857	857	j	857j	y	a	a5		3	2439.04	430.633	2383.817	189.956	226.835	5253.49
DGRP-857	857	j	857j	y	a	a5		4	2441.576	619.437	2939.296	268.701	343.105	6000.309
DGRP-857	857	j	857j	y	a	a5		5	2208.727	461.985	2354.936	216.09	244.308	5025.648
DGRP-861	861	k	861k	x	a	a5		1	2385.503	473.146	1577.651	78.97	104.176	4436.3
DGRP-861	861	k	861k	x	a	a5		2	2183.064	222.733	1648.445	96.489	123.188	4054.242
DGRP-861	861	k	861k	y	a	a5		1	2415.314	490.181	2617.001	223.67	252.001	5522.496
DGRP-861	861	k	861k	y	a	a5		2	2099.174	363.404	2853.422	235.89	190.083	5316
DGRP-908	908	t	908t	x	a	a5		1	2593.853	437.556	1724.638	109.536	122.297	4756.047
DGRP-908	908	t	908t	x	a	a5		2	2205.853	368.831	2348.21	131.265	243.878	4922.894
DGRP-908	908	t	908t	x	a	a5		3	2741.739	389.32	2304.496	118.995	147.366	5435.555
DGRP-908	908	t	908t	x	a	a5		4		346.032	1934.551	121.797	196.685
DGRP-908	908	t	908t	x	a	a5		5	1873.986	462.986	1514.382	182.24	192.929	3851.354
DGRP-908	908	t	908t	y	a	a5		1	2478.775	469.209	2413.489	218.848	224.063	5361.473
DGRP-908	908	t	908t	y	a	a5		2	2361.119	388.963	2189.983	184.153	279.377	4940.065
DGRP-908	908	t	908t	y	a	a5		3	2158.054	416.085	2458.824	201.848	272.199	5032.963
DGRP-908	908	t	908t	y	a	a5		4	2481.854	698.759	2434.908	194.45	316.675	5615.521
DGRP-908	908	t	908t	y	a	a5		5	2815.794	490	2366.015	247.697	381.107	5671.809
DGRP-38	38	v	38v	x	a	a6		1	1450.609	369.934	2177.726	212.122	165.619	3998.269
DGRP-38	38	v	38v	x	a	a6		2	2337.264	299.614	2097.116	182.809	233.52	4733.994
DGRP-38	38	v	38v	x	a	a6		3	2107.792	428.769	1612.173	195.364	198.741	4148.734
DGRP-38	38	v	38v	x	a	a6		4	1735.237	221.465	1233.566	110.635	92.185	3190.268
DGRP-38	38	v	38v	x	a	a6		5	1840.195	319.677	2014.547	175.498	205.955	4174.419
DGRP-38	38	v	38v	y	a	a6		1	2839.955	391.536	2374.782	240.83	299.626	5606.273
DGRP-38	38	v	38v	y	a	a6		2	2635.529	390.07	2264.36	208.793	230.358	5289.959
DGRP-38	38	v	38v	y	a	a6		3	2306.157	399.518	2563.069	312.195	304.924	5268.744
DGRP-38	38	v	38v	y	a	a6		4	2212.733	349.4	1883.202	216.871	297.239	4445.335
DGRP-38	38	v	38v	y	a	a6		5	2326.313	366.883	1839.084	199.317	248.482	4532.28
DGRP-42	42	e	42e	x	a	a6		1	1725.472	380.693	1472.58	103.138	150.139	3578.745
DGRP-42	42	e	42e	x	a	a6		2	1889.835	349.687	1667.74	124.918	237.571	3907.262
DGRP-42	42	e	42e	x	a	a6		3	1949.295	448.038	1423.648	137.434	197.969	3820.981
DGRP-42	42	e	42e	x	a	a6		4	1419.597	263.073	1158.054	137.528	194.405	2840.724
DGRP-42	42	e	42e	x	a	a6		5	2427.57	421.015	1976.687	140.874	266.747	4825.272
DGRP-42	42	e	42e	y	a	a6		1	1754.202	524.213	2424.378	327.753	396.374	4702.793
DGRP-42	42	e	42e	y	a	a6		2	2180.207	478.573	2332.293	313.298	270.254	4991.073
DGRP-42	42	e	42e	y	a	a6		3	1842.543	393.188	1912.808	275.785	283.866	4148.539
DGRP-42	42	e	42e	y	a	a6		4	1944.891	420.602	2556.604	202.97	326.108	4922.097
DGRP-42	42	e	42e	y	a	a6		5	1660.254	298.889	1576.429	275.216	260.368	3535.572
DGRP-83	83	f	83f	x	a	a6		1	1651.278	886.763	2220.186	168.118	300.508	4758.227
DGRP-83	83	f	83f	x	a	a6		2	1526.943	627.163	2322.41	285.805	358.854	4476.516
DGRP-83	83	f	83f	x	a	a6		3	2408.546	541.148	2991.303	177.29	277.681	5940.997
DGRP-83	83	f	83f	y	a	a6		1	2966.477	670.706	2125.065	209.061	398.183	5762.248
DGRP-83	83	f	83f	y	a	a6		2	2623.542	697.71	2629.236	239.282	387.288	5950.488
DGRP-83	83	f	83f	y	a	a6		3	2364.405	599.568	3348.434	328.672	372.668	6312.407
DGRP-83	83	f	83f	y	a	a6		4				388.526	357.306	5299.513
DGRP-83	83	f	83f	y	a	a6		5				299.812	283.997	5664.256
DGRP-129	129	f	129f	x	a	a6		1	1904.987	514.745	1945.458	113.058	184.218	4365.19
DGRP-129	129	f	129f	x	a	a6		2	1552.754	238.631	1561.823	128.301	182.914	3353.208
DGRP-129	129	f	129f	x	a	a6		3	1907.229	431.547	1822.931	153.948	180.097	4161.707
DGRP-129	129	f	129f	x	a	a6		4	1480.492	429.923	1360.563	152.849	198.424	3270.978
DGRP-129	129	f	129f	x	a	a6		5	2451.703	453.086	2011.167	158.773	178.864	4915.956
DGRP-129	129	f	129f	y	a	a6		1	2213.039	454.687	1755.806	158.213	244.812	4423.532
DGRP-129	129	f	129f	y	a	a6		2	2084.819	541.353	2004.878	203.82	252.071	4631.05
DGRP-129	129	f	129f	y	a	a6		3	2615.288	646.684	2216.17	158.003	162.749	5478.142
DGRP-129	129	f	129f	y	a	a6		4	2088.319	586.306	1827.316	142.544	184.618	4501.941
DGRP-129	129	f	129f	y	a	a6		5	2244.539	392.872	1970.345	184.711	199.585	4607.756
DGRP-129	129	f	129f	y	a	a6		6	2283.679	565.946	2132.8	171.134	206.043	4982.425
DGRP-181	181	n	181n	x	a	a6		1	1654.744	356.764	1673.928	191.795	205.737	3685.436
DGRP-181	181	n	181n	x	a	a6		2	1469.108	265.402	1759.102	199.521	194.726	3493.612
DGRP-181	181	n	181n	x	a	a6		3	1729.496	266.379	1636.521	156.425	183.544	3632.396
DGRP-181	181	n	181n	x	a	a6		4	1762.224	287.832	1456.783	144.468	150.679	3506.839
DGRP-181	181	n	181n	y	a	a6		1	1846.428	352.43	1478.38	235.457	233.026	3677.238
DGRP-181	181	n	181n	y	a	a6		2	1769.878	330.34	1587.79	217.86	279.177	3688.008
DGRP-181	181	n	181n	y	a	a6		3	1331.119	406.24	1433.447	255.77	279.157	3170.806
DGRP-227	227	s	227s	x	a	a6		1	2790.685	287.895	1300.912	138.581	140.5	4379.492
DGRP-227	227	s	227s	x	a	a6		2	1929.161	276.624	1381.149	123.245	146.428	3586.934
DGRP-227	227	s	227s	x	a	a6		3	2058.192	357.031	1727.259	137.565	169.366	4142.482
DGRP-227	227	s	227s	x	a	a6		4	2132.588	234.64	1861.194	124.805	171.722	4228.422
DGRP-227	227	s	227s	x	a	a6		5	2501.743	329.807	2251.936	118.994	135.688	5083.486
DGRP-227	227	s	227s	y	a	a6		1	2664.258	203.435	2369.387	239.138	174.883	5237.08
DGRP-227	227	s	227s	y	a	a6		2	2927.743	347.946	2563.781	257.721	246.87	5839.47
DGRP-227	227	s	227s	y	a	a6		3	2712.65	359.567	2288.859	240.648	196.729	5361.076
DGRP-227	227	s	227s	y	a	a6		4	2490.57	521.155	1884.112	255.534	205.008	4895.837
DGRP-239	239	w	239w	x	a	a6		1	2076.379	393.494	1613.562	232.339	279.879	4083.435
DGRP-239	239	w	239w	x	a	a6		2	2124.961	308.001	1793.534	266.528	237.36	4226.496
DGRP-239	239	w	239w	y	a	a6		1	2025.32	341.617	1514.656	324.607	259.275	3881.593
DGRP-239	239	w	239w	y	a	a6		2	2934.416	534.942	2011.488	250.22	304.664	5480.846
DGRP-239	239	w	239w	y	a	a6		3	1614.036	342.761	1701.475	360.25	304.339	3658.272
DGRP-359	359	h	359h	x	a	a6		1	2182.283	258.262	2191.548	178.407	126.124	4632.093
DGRP-359	359	h	359h	x	a	a6		2	1838.68	437.3	2243.572	200.289	210.247	4519.552
DGRP-359	359	h	359h	x	a	a6		3	1881.913	318.854	1886.566	212.102	224.791	4087.333
DGRP-359	359	h	359h	y	a	a6		1	2465.607	542.7	2466.567	268.166	328.231	5474.874
DGRP-359	359	h	359h	y	a	a6		2	3140.211	961.119	2684.916	221.233	187.765	6786.246
DGRP-359	359	h	359h	y	a	a6		3	2638.605	883.925	2248.169	282.781	369.421	5770.699
DGRP-361	361	i	361i	x	a	a6		1	2595.581	325.47	1954.028	258.49	251.767	4875.079
DGRP-361	361	i	361i	x	a	a6		2	2213.658	458.864	1848.932	269.165	329.338	4521.454
DGRP-361	361	i	361i	x	a	a6		3	1853.801	459.648	1501.976	204.605	221.01	3815.425
DGRP-361	361	i	361i	x	a	a6		4	2384.633	327.551	1984.036	248.433	254.807	4696.22
DGRP-361	361	i	361i	x	a	a6		5	2217.133	393.563	2099.744	238.955	285.888	4710.44
DGRP-361	361	i	361i	y	a	a6		1	2672.005	468.344	2186.944	251.213	264.834	5327.293
DGRP-361	361	i	361i	y	a	a6		2	2374.199	794.076	2496.68	344.657	309.198	5664.955
DGRP-361	361	i	361i	y	a	a6		3	2469.398	315.907	2093.986	221.031	176.762	4879.291
DGRP-361	361	i	361i	y	a	a6		4	2139.859	650.292	2399.299	307.144	344.355	5189.45
DGRP-375	375	x	375x	x	a	a6		1	2488.371	489.041	2133.383	204.295	211.792	5110.795
DGRP-375	375	x	375x	x	a	a6		2	2923.545	449.302	2430.583	162.019	168.951	5803.43
DGRP-375	375	x	375x	x	a	a6		3	2681.139	575.006	2502.71	114.326	163.004	5758.855
DGRP-375	375	x	375x	x	a	a6		4	2570.867	588.865	2572.891	122.062	232.131	5732.623
DGRP-375	375	x	375x	x	a	a6		5	2652.639	576.299	2536.905	127.142	160.253	5765.843
DGRP-375	375	x	375x	y	a	a6		1	3437.751	638.015	3316.552	359.585	347.798	7392.318
DGRP-375	375	x	375x	y	a	a6		2	2752.675	594.303	3334.903	267.913	426.688	6681.881
DGRP-375	375	x	375x	y	a	a6		3	2738.412	695.101	2982.384	324.866	315.349	6415.897
DGRP-375	375	x	375x	y	a	a6		4	2850.491	977.82	2655.861	292.965	415.432	6484.172
DGRP-375	375	x	375x	y	a	a6		5	2792.148	764.363	3357.713	310.459	327.556	6914.224
DGRP-381	381	o	381o	x	a	a6		1	1794.799	272.425	1355.905	152.443	164.378	3423.129
DGRP-381	381	o	381o	x	a	a6		2	1697.74	499.292	1216.155	159.076	211.088	3413.187
DGRP-381	381	o	381o	x	a	a6		3	1776.358	271.063	1081.197	113.792	152.222	3128.618
DGRP-381	381	o	381o	x	a	a6		4	1902.163	382.375	1360.802	159.27	189.418	3645.34
DGRP-381	381	o	381o	y	a	a6		1	2330.424	454.037	2063.513	187.424	320.717	4847.974
DGRP-381	381	o	381o	y	a	a6		2	1880.736	647.441	2075.394	264.591	270.36	4603.571
DGRP-381	381	o	381o	y	a	a6		3	1946.078	486.836	2431.747	202.235	288.209	4864.661
DGRP-509	509	b	509b	x	a	a6		1	2671.626	549.028	2872.757	324.047	366.041	6093.411
DGRP-509	509	b	509b	x	a	a6		2	1983.554	445.239	1715.541	255.766	264.404	4144.334
DGRP-509	509	b	509b	y	a	a6		1	2646.78	449.204	2626.053	289.524	330.746	5722.037
DGRP-509	509	b	509b	y	a	a6		2	3019.628	498.263	2497.941	350.02	337.238	6015.832
DGRP-517	517	e	517e	x	a	a6		1	2283.652	477.128	2724.113	193.61	183.791	5484.893
DGRP-517	517	e	517e	x	a	a6		2	2005.424	376.529	2198.388	138.73	231.494	4580.341
DGRP-517	517	e	517e	x	a	a6		3	2420.168	436.558	2476.706	227.431	242.054	5333.432
DGRP-517	517	e	517e	x	a	a6		4	2449.611	453.576	1573.134	184.391	236.678	4476.321
DGRP-517	517	e	517e	x	a	a6		5	2219.638	297.597	1626.502	155.451	187.285	4143.737
DGRP-517	517	e	517e	y	a	a6		1	2243.605	901.422	2682.517	285.708	452.498	5827.544
DGRP-517	517	e	517e	y	a	a6		2	2229.726	716.439	2271.544	271.707	282.105	5217.709
DGRP-517	517	e	517e	y	a	a6		3	2695.487	737.322	3012.443	305.167	323.061	6445.252
DGRP-559	559	t	559t	x	a	a6		1	1712.662	465.826	2080.992	220.147	207.414	4259.48
DGRP-559	559	t	559t	x	a	a6		2	1918.341	284.83	2062.494	283.74	251.249	4265.665
DGRP-559	559	t	559t	x	a	a6		3	1737.792	782.226	2110.157	201.385	257.167	4630.175
DGRP-559	559	t	559t	x	a	a6		4	1954.463	412.794	2045.138	192.683	354.708	4412.395
DGRP-559	559	t	559t	x	a	a6		5	2328.549	401.125	1708.409	258.973	284.634	4438.083
DGRP-559	559	t	559t	y	a	a6		1	2796.932	660.644	2455.672	263.158	352.686	5913.248
DGRP-559	559	t	559t	y	a	a6		2	2275.403	540.637	2058.653	311.294	290.138	4874.693
DGRP-559	559	t	559t	y	a	a6		3	2551.562	329.654	2078.471	334.182	296.9	4959.687
DGRP-559	559	t	559t	y	a	a6		4	2747.312	378.829	2531.564	272.218	414.633	5657.705
DGRP-639	639	g	639g	x	a	a6		1	2679.194	431.268	2794.421	292.1	338.636	5904.883
DGRP-639	639	g	639g	x	a	a6		2	2565.972	545.069	2123.93	309.071	412.802	5234.971
DGRP-639	639	g	639g	x	a	a6		3	2439.637	485.22	2575.096	318.82	335.618	5499.953
DGRP-639	639	g	639g	x	a	a6		4	2316.875	513.45	2162.97	357.22	438.025	4993.295
DGRP-639	639	g	639g	x	a	a6		5	1893.252	596.38	2646.539	323.591	288.275	5136.171
DGRP-639	639	g	639g	y	a	a6		1	2383.566	458.84	2230.447	320.969	422.78	5072.853
DGRP-639	639	g	639g	y	a	a6		2	2582.903	526.112	2240.794	302.546	439.056	5349.809
DGRP-639	639	g	639g	y	a	a6		3	2600.679	648.756	3425.475	290.881	346.603	6674.91
DGRP-639	639	g	639g	y	a	a6		4	3087.914	519.028	2129.215	374.001	346.296	5736.157
DGRP-730	730	j	730j	x	a	a6		1	2436.865	574.74	1762.542	100.449	149.677	4774.147
DGRP-730	730	j	730j	x	a	a6		2	2568.621	303.878	2430.046	144.843	218.68	5302.545
DGRP-730	730	j	730j	x	a	a6		3	2221.919	509.192	1688.632	140.954	208.141	4419.743
DGRP-730	730	j	730j	x	a	a6		4	2304.979	372.366	2049.063	117.301	199.073	4726.408
DGRP-730	730	j	730j	y	a	a6		1	2294.683	457.013	2169.604	167.359	281.381	4921.3
DGRP-730	730	j	730j	y	a	a6		2	3186.348	458.562	2631.572	174.311	251.066	6276.482
DGRP-730	730	j	730j	y	a	a6		3	2740.591	443.295	2441.732	149.582	289.973	5625.618
DGRP-730	730	j	730j	y	a	a6		4	2626.531	403.402	1996.321	211.324	284.305	5026.254
DGRP-730	730	j	730j	y	a	a6		5	2687.563	513.055	2013.393	120.516	209.888	5214.011
DGRP-765	765	l	765l	x	a	a6		1	2526.504	400.171	2666.529	225.977	238.333	5593.204
DGRP-765	765	l	765l	x	a	a6		2	2087.736	516.325	2241.095	212.714	252.788	4845.156
DGRP-765	765	l	765l	x	a	a6		3	2186.166	543.643	2754.38	204.772	178.692	5484.189
DGRP-765	765	l	765l	x	a	a6		4	2300.113	500.243	2332.169	238.484	255.812	5132.525
DGRP-765	765	l	765l	x	a	a6		5	2834.926	517.52	2747.936	195.364	277.024	6100.382
DGRP-765	765	l	765l	y	a	a6		1	2284.827	478.852	2989.17	303.413	264.63	5752.849
DGRP-765	765	l	765l	y	a	a6		2	2385.415	487.66	2620.32	319.422	238	5493.395
DGRP-765	765	l	765l	y	a	a6		3	2274.701	651.609	2425.738	314.834	336.893	5352.048
DGRP-765	765	l	765l	y	a	a6		4	2022.639	568.817	2038.28	226.879	267.946	4629.736
DGRP-765	765	l	765l	y	a	a6		5	2588.202	685.04	1910.831	226.251	350.5	5184.073
DGRP-804	804	u	804u	x	a	a6		1	1662.388	421.925	2424.307	172.49	235.298	4508.62
DGRP-804	804	u	804u	x	a	a6		2	2056.499	284.434	2244.68	138.844	211.183	4585.613
DGRP-804	804	u	804u	x	a	a6		3	2140.829	415.759	2148.308	135.698	213.542	4704.896
DGRP-804	804	u	804u	x	a	a6		4	1934.266	309.561	1802.564	128.799	185.481	4046.391
DGRP-804	804	u	804u	y	a	a6		1	2243.405	576.94	2337.69	156.636	275.612	5158.035
DGRP-804	804	u	804u	y	a	a6		2	2110.424	454.545	2537.291	279.558	300.407	5102.26
DGRP-804	804	u	804u	y	a	a6		3	1990.321	533.244	2213.229	273.076	311.885	4736.794
DGRP-804	804	u	804u	y	a	a6		4	1991.748	642.441	2358.038	231.216	248.2	4992.227
DGRP-804	804	u	804u	y	a	a6		5	2617.92	733.866	2699.851	273.183	272.13	6051.637
DGRP-808	808	w	808w	x	a	a6		1	3031.927	582.409	2063.096	106.151	95.771	5677.432
DGRP-808	808	w	808w	x	a	a6		2	3062.785	390.736	2273.844	136.189	159.013	5727.365
DGRP-808	808	w	808w	x	a	a6		3	2739.913	432.063	2860.157	167.468	159.515	6032.133
DGRP-808	808	w	808w	x	a	a6		4	2675.493	317.008	2124.432	193.223	211.053	5116.933
DGRP-808	808	w	808w	y	a	a6		1	3000.196	528.282	2349.19	390	345.575	5877.668
DGRP-808	808	w	808w	y	a	a6		2	3078.518	521.493	2997.187	152.253	176.18	6597.198
DGRP-808	808	w	808w	y	a	a6		3	2789.543	381.064	1896.922	127.012	153.622	5067.529
DGRP-808	808	w	808w	y	a	a6		4	2792.966	528.437	2666.695	305.591	282.15	5988.098
DGRP-808	808	w	808w	y	a	a6		5	2900.587	523.417	2620.813	280.806	281.936	6044.817
DGRP-821	821	a	821a	x	a	a6		1	2258.849	329.475	2162.725	200.448	235.644	4751.049
DGRP-821	821	a	821a	x	a	a6		2	1678.92	306.431	1761.157	222.25	253.584	3746.508
DGRP-821	821	a	821a	x	a	a6		3	2292.333	373.968	1546.325	179.29	244.652	4212.626
DGRP-821	821	a	821a	x	a	a6		4	2336.765	382.926	2161.129	230.782	287.38	4880.82
DGRP-821	821	a	821a	y	a	a6		1	2840.303	334.552	1945.38	339.07	341.434	5120.235
DGRP-821	821	a	821a	y	a	a6		2	2728.845	429.102	1950.427	270.248	403.851	5108.374
DGRP-821	821	a	821a	y	a	a6		3	2500.731	642.105	2359.613	370.091	375.7	5502.449
DGRP-821	821	a	821a	y	a	a6		4	1922.838	419.302	2028.605	328.905	388.755	4370.745
DGRP-821	821	a	821a	y	a	a6		5	1814.534	417.38	2060.975	396.015	327.897	4292.889
DGRP-822	822	b	822b	x	a	a6		1	2814.021	389.695	3038.945	166.554	206.405	6242.661
DGRP-822	822	b	822b	x	a	a6		2	2276.628	268.904	1839.353	176.672	186.866	4384.885
DGRP-822	822	b	822b	x	a	a6		3	2293.866	469.23	1502.004	156.271	212.755	4265.1
DGRP-822	822	b	822b	y	a	a6		1	2469.279	446.795	2018.406	279.326	351.004	4934.48
DGRP-822	822	b	822b	y	a	a6		2	2705.142	683.479	1996.511	440.215	449.404	5385.132
DGRP-822	822	b	822b	y	a	a6		3	2556.59	455.274	2101.492	235.536	329.02	5113.356
DGRP-822	822	b	822b	y	a	a6		4	2262.727	442.108	2102.838	299.331	430.964	4807.673
DGRP-822	822	b	822b	y	a	a6		5	2451.014	974.799	2208.296	359.901	465.37	5634.109
DGRP-837	837	d	837d	x	a	a6		1	2021.063	598.253	1740.285	244.165	153.171	4359.601
DGRP-837	837	d	837d	x	a	a6		2	1750.793	384.029	1557.454	158.491	154.549	3692.276
DGRP-837	837	d	837d	x	a	a6		3	2092.655	414.351	1962.552	128.295	202.528	4469.558
DGRP-837	837	d	837d	x	a	a6		4	1649.086	343.364	1542.83	103.592	182.214	3535.28
DGRP-837	837	d	837d	x	a	a6		5	2016.71	378.902	1473.519	105.745	137.663	3869.131
DGRP-837	837	d	837d	y	a	a6		1	2765.469	444.031	2110.149	260.815	331.331	5319.649
DGRP-837	837	d	837d	y	a	a6		2	2786.556	573.909	2594.457	300.466	281.195	5954.922
DGRP-837	837	d	837d	y	a	a6		3	2476.304	496.599	2102.719	204.885	237.679	5075.622
DGRP-837	837	d	837d	y	a	a6		4	2717.995	736.204	1784.191	158.889	240.274	5238.39
DGRP-837	837	d	837d	y	a	a6		5	2710.541	529.946	2199.035	189.676	253.616	5439.522
DGRP-843	843	e	843e	x	a	a6		1	2322.521	410.014	2158.113	258	289.562	4890.648
DGRP-843	843	e	843e	x	a	a6		2	1614.509	620.403	1820.087	186.047	272.066	4054.999
DGRP-843	843	e	843e	x	a	a6		3	2568.385	497.979	2316.239	240.743	318.007	5382.603
DGRP-843	843	e	843e	x	a	a6		4	2122.245	469.091	2420.624	280.165	292.568	5011.96
DGRP-843	843	e	843e	x	a	a6		5	2265.973	479.314	2227.329	256.551	257.316	4972.616
DGRP-843	843	e	843e	y	a	a6		1	2360.765	842.358	2470.967	369.316	370.491	5674.09
DGRP-843	843	e	843e	y	a	a6		2	2394.571	467.529	3195.343	355.44	374.764	6057.443
DGRP-843	843	e	843e	y	a	a6		3	2943.856	716.566	2210.413	247.808	380.291	5870.835
DGRP-843	843	e	843e	y	a	a6		4	2769.253	695.573	2339.791	262.299	444.136	5804.617
DGRP-843	843	e	843e	y	a	a6		5	2415.132	871.669	2833.222	344.943	446.698	6120.023
DGRP-887	887	a	887a	x	a	a6		1	2345.824	437.24	2069.576	158.043	295.33	4852.64
DGRP-887	887	a	887a	x	a	a6		2	2270.944	333.955	1844.084	127.012	234.553	4448.983
DGRP-887	887	a	887a	x	a	a6		3	2231.191	547.466	1906.433	130.825	205.588	4685.09
DGRP-887	887	a	887a	x	a	a6		4	2362.814	550.602	1791.406	135.776	214.767	4704.822
DGRP-887	887	a	887a	y	a	a6		1	2477.894	596.353	2228.282	243.6	327.739	5302.529
DGRP-887	887	a	887a	y	a	a6		2	2145.405	673.027	2391.124	369.421	340.267	5209.556
DGRP-887	887	a	887a	y	a	a6		3	2439.684	619.225	2142.661	299.351	361.441	5201.57
DGRP-911	911	u	911u	x	a	a6		1	2784.73	397.471	2778.532	202.905	226.861	5960.733
DGRP-911	911	u	911u	x	a	a6		2	2533.786	601.447	2336.362	214.27	210	5471.595
DGRP-911	911	u	911u	x	a	a6		3	2984.124	611.795	2761.235	239.349	341.656	6357.154
DGRP-911	911	u	911u	y	a	a6		1	4370.306	535.994	2927.069	315.972	346.789	7833.369
DGRP-911	911	u	911u	y	a	a6		2	2941.1	807.719	2620.039	300.36	333.201	6368.858
DGRP-911	911	u	911u	y	a	a6		3	2295.649	664.343	2527.271	308.783	295.965	5487.263
DGRP-911	911	u	911u	y	a	a6		4	2793.258	739.789	2786.645	313.92	363.028	6319.692
DGRP-911	911	u	911u	y	a	a6		5	2787.665	640.394	2762.286	342.779	366.151	6190.345
DGRP-38	38	u	38u	x	c	c1		1	2903.549	330.952	2085.53	157.956	233.177	5320.031
DGRP-38	38	u	38u	x	c	c1		2	2356.868	526.957	1627.722	162.019	238.372	4511.547
DGRP-38	38	u	38u	x	c	c1		3	2494.759	415.579	1696.233	151.411	257.751	4606.571
DGRP-38	38	u	38u	x	c	c1		4	2430.283	431.924	2054.464	138.614	216.34	4916.671
DGRP-38	38	u	38u	x	c	c1		5	2092.118	471.063	1120.843	126.855	197.562	3684.024
DGRP-38	38	u	38u	y	c	c1		1	2600.077	3048.294	2091.433	132.832	234.731	7739.804
DGRP-38	38	u	38u	y	c	c1		2	2440.263	422.711	2192.342	132.799	207.907	5055.316
DGRP-38	38	u	38u	y	c	c1		3	2603.761	325.357	2221.689	124.594	256.27	5150.807
DGRP-38	38	u	38u	y	c	c1		4	3159.708	552.702	2293.706	187.095	286.871	6006.116
DGRP-38	38	u	38u	y	c	c1		5	2836.164	340.953	2104.983	156.831	241.479	5282.1
DGRP-41	41	v	41v	x	c	c1		1	1892.791	461.261	1940.565	234.546	263.814	4294.617
DGRP-41	41	v	41v	x	c	c1		2	2239.834	345.254	1690.189	183.905	239.649	4275.277
DGRP-41	41	v	41v	x	c	c1		3	2378.402	414.625	1761.974	206.437	230.31	4555.001
DGRP-41	41	v	41v	x	c	c1		4	2288.036	488.512	2259.65	239.273	234.578	5036.198
DGRP-41	41	v	41v	x	c	c1		5	2324.796	437.887	2331.154	198.601	228.891	5093.837
DGRP-41	41	v	41v	y	c	c1		1	2378.455	408.391	2027.169	263.462	345.527	4814.015
DGRP-41	41	v	41v	y	c	c1		2	2200.388	499.81	2201.285	283.613	331.481	4901.483
DGRP-41	41	v	41v	y	c	c1		3	2117.443	524.253	2386.181	295.462	384.182	5027.877
DGRP-41	41	v	41v	y	c	c1		4	2290.692	519.006	2257.94	333.667	272.809	5067.638
DGRP-57	57	c	57c	x	c	c1		1	1867.906	336.88	1688.788	134.708	205.193	3893.574
DGRP-57	57	c	57c	x	c	c1		2	1550.469	386.307	1276.096	139.119	194.841	3212.872
DGRP-57	57	c	57c	x	c	c1		3	1392.607	390.877	1482.884	229.961	176.448	3266.368
DGRP-57	57	c	57c	x	c	c1		4	1746.95	399.065	1571.034	137.216	169.747	3717.049
DGRP-57	57	c	57c	x	c	c1		5	1727.027	478.521	1187.064	180.268	192.595	3392.612
DGRP-57	57	c	57c	y	c	c1		1	1893.298	411.086	1949.48	242.225	216.167	4253.864
DGRP-57	57	c	57c	y	c	c1		2	2050.131	454.661	1838.105	247.731	298.374	4342.897
DGRP-57	57	c	57c	y	c	c1		3	1873.465	544.796	1990.984	261.557	245.444	4409.245
DGRP-57	57	c	57c	y	c	c1		4	1907.311	499.955	1182.364	289.465	251.767	3589.63
DGRP-57	57	c	57c	y	c	c1		5	1628.399	536.169	1602.445	248.996	329.918	3767.013
DGRP-75	75	a	75a	x	c	c1		1	2166.557	437.36	2093.069	170.447	189.079	4696.986
DGRP-75	75	a	75a	x	c	c1		2	1895.164	355.484	1606.298	120.135	189.292	3856.946
DGRP-75	75	a	75a	x	c	c1		3	1743.332	353.882	2209.178	115.293	141.358	4306.392
DGRP-75	75	a	75a	x	c	c1		4	1818.615	470.746	1621.609	138.766	166.581	3910.97
DGRP-75	75	a	75a	x	c	c1		5	2073.477	347.018	1653.895	128	148.098	4074.39
DGRP-75	75	a	75a	y	c	c1		1	2089.497	554.837	1901.449	134.424	130.154	4545.783
DGRP-75	75	a	75a	y	c	c1		2	2031.392	517.668	1914.008	253.272	180.041	4463.068
DGRP-75	75	a	75a	y	c	c1		3	2448.411	768.346	2565.647	276.391	308.029	5782.404
DGRP-75	75	a	75a	y	c	c1		4	1949.903	808.378	2213.754	237.228	272.633	4972.035
DGRP-75	75	a	75a	y	c	c1		5	2318.404	720.205	2234.175	174.456	181.401	5272.784
DGRP-91	91	c	91c	x	c	c1		1	2365.469	503.504	1790.013	142.896	238.133	4658.986
DGRP-91	91	c	91c	x	c	c1		2	1871.166	436.308	1951.171	108.145	189.361	4258.645
DGRP-91	91	c	91c	x	c	c1		3	1895.796	388.955	2100.359	174.183	202.989	4385.11
DGRP-91	91	c	91c	x	c	c1		4	2104.915	487.836	2220.62	138.6	221.019	4813.371
DGRP-91	91	c	91c	x	c	c1		5	2242.5	545.782	1810.881	127.22	231.221	4599.163
DGRP-91	91	c	91c	y	c	c1		1	1816.712	458.93	2073.159	229.961	277.148	4348.801
DGRP-91	91	c	91c	y	c	c1		2	2587.664	573.391	2124.081	266.031	294.027	5285.136
DGRP-91	91	c	91c	y	c	c1		3	2345.1	716.903	2692.957	348.321	383.981	5754.96
DGRP-91	91	c	91c	y	c	c1		4	2288.632	569.088	2203.45	256.4	350.7	5061.17
DGRP-91	91	c	91c	y	c	c1		5	2269.215	505.055	2418.579	200.307	280.7	5192.849
DGRP-176	176	l	176l	x	c	c1		1	2617.587	416.735	2508.348	232.354	255.242	5542.67
DGRP-176	176	l	176l	x	c	c1		2	2274.521	559.292	1891.4	204.547	296.844	4725.213
DGRP-176	176	l	176l	x	c	c1		3	2137.932	324.061	1833.744	215.106	232.902	4295.737
DGRP-176	176	l	176l	x	c	c1		4	1396.364	497.698	1397.639	269.294	269.19	3291.701
DGRP-176	176	l	176l	x	c	c1		5				194.096	284.589	3096.454
DGRP-176	176	l	176l	y	c	c1		1	2942.908	617.872	2360.097	255.221	290.998	5920.877
DGRP-176	176	l	176l	y	c	c1		2	2025.856	500.486	2085.992	244.179	329.258	4612.334
DGRP-176	176	l	176l	y	c	c1		3	2362.049	618.058	1396.319	293.739	398.522	4376.426
DGRP-176	176	l	176l	y	c	c1		4	2129.979	328.395	1804.259	225.653	303.134	4262.633
DGRP-176	176	l	176l	y	c	c1		5	1441.489	381.578	1387.841	245.207	346.689	3210.908
DGRP-189	189	o	189o	x	c	c1		1	2213.155	174.789	1341.17	98.784	137	3729.114
DGRP-189	189	o	189o	x	c	c1		2	1933.185	393.635	2019.839	112.367	155.962	4346.659
DGRP-189	189	o	189o	x	c	c1		3	2470.999	282.527	2017.614	102.9	124.644	4771.14
DGRP-189	189	o	189o	x	c	c1		4	2291.688	387.4	1876.803	108.625	204.751	4555.891
DGRP-189	189	o	189o	x	c	c1		5	1960.621	372.903	1505.57	126.254	141.942	3839.094
DGRP-189	189	o	189o	y	c	c1		1	2077.249	321.273	1516.435	148.752	168.048	3914.957
DGRP-189	189	o	189o	y	c	c1		2	2064.673	286.277	1976.289	133.896	131.81	4327.239
DGRP-189	189	o	189o	y	c	c1		3	1433.524	349.555	2206.737	121.797	160.328	3989.816
DGRP-189	189	o	189o	y	c	c1		4	2077.09	383.479	1742.014	148.782	126.396	4202.583
DGRP-189	189	o	189o	y	c	c1		5	2313.685	348.35	1903.828	163.867	155.4	4565.863
DGRP-208	208	l	208l	x	c	c1		1	2520.329	517.034	2535.554	140.757	253.69	5572.917
DGRP-208	208	l	208l	x	c	c1		2	2708.174	402.289	2341.371	132.606	205.988	5451.834
DGRP-208	208	l	208l	x	c	c1		3	2488.1	518.03	2692.607	127.879	209.18	5698.737
DGRP-208	208	l	208l	x	c	c1		4	2000.47	431.108	2329.529	167.668	189.361	4761.107
DGRP-208	208	l	208l	x	c	c1		5	2505.757	528.249	2237.518	183.345	246.629	5271.524
DGRP-208	208	l	208l	y	c	c1		1	3225.68	525.085	2315.26	160.587	250.736	6066.025
DGRP-208	208	l	208l	y	c	c1		2	2443.802	609.405	2528.264	163.61	286.988	5581.471
DGRP-208	208	l	208l	y	c	c1		3	2502.394	654.363	2973.252	220.73	270.171	6130.009
DGRP-208	208	l	208l	y	c	c1		4	2578.634	467.182	2368.011	232.038	261.964	5413.827
DGRP-208	208	l	208l	y	c	c1		5	2681.647	521.664	2771.986	237.511	287	5975.297
DGRP-228	228	t	228t	x	c	c1		1	2685.672	268.174	2018.885	135.815	204.995	4972.731
DGRP-228	228	t	228t	x	c	c1		2	842.594	1707.808	430.719	2293.281	129.511	2981.121
DGRP-228	228	t	228t	x	c	c1		3	2353	497.801	2461.479	162.75	173.643	5312.28
DGRP-228	228	t	228t	x	c	c1		4
DGRP-228	228	t	228t	x	c	c1		5
DGRP-228	228	t	228t	y	c	c1		1
DGRP-228	228	t	228t	y	c	c1		2	2484.842	492.297	2496.105	251.606	240.24	5473.244
DGRP-228	228	t	228t	y	c	c1		3	3046.316	403.321	2258.904	193.999	276.982	5708.541
DGRP-228	228	t	228t	y	c	c1		4	2239.19	496.578	2764.926	2764.926	240.487	5500.694
DGRP-228	228	t	228t	y	c	c1		5	2332.34	525.472	2665.358	164.643	201.761	5523.17
DGRP-235	235	x	235x	x	c	c1		1	2269.258	391.984	2138.496	111.806	115.895	4799.738
DGRP-235	235	x	235x	x	c	c1		2	1901.558	326.258	1669.092	118.683	127.492	3896.908
DGRP-235	235	x	235x	x	c	c1		3	1849.107	343.589	1670.096	136.189	150.936	3862.792
DGRP-235	235	x	235x	x	c	c1		4	2093.165	278.5	1685.054	122.913	163.056	4056.719
DGRP-235	235	x	235x	x	c	c1		5	2505.886	394.196	1759.6	102.294	156.926	4659.682
DGRP-235	235	x	235x	y	c	c1		1	2276.933	494.995	2595.568	344.533	330.27	5367.496
DGRP-235	235	x	235x	y	c	c1		2	2282.289	475.222	2523.673	358.776	343.261	5281.184
DGRP-235	235	x	235x	y	c	c1		3	2116.471	392.584	2329.493	287.535	277.452	4838.548
DGRP-235	235	x	235x	y	c	c1		4	2247.328	436.255	2644.829	303.884	300.266	5328.412
DGRP-235	235	x	235x	y	c	c1		5	2341.232	422.781	2401.277	320.98	363.716	5165.29
DGRP-237	237	v	237v	x	c	c1		1	2537.619	480.224	1845.113	139.556	251.204	4862.956
DGRP-237	237	v	237v	x	c	c1		2	2093.902	494.004	1601.401	134.074	245.679	4189.307
DGRP-237	237	v	237v	x	c	c1		3	2182.789	523.31	1923.721	117.979	307.725	4629.82
DGRP-237	237	v	237v	x	c	c1		4	2439.84	575.943	1906.829	138.115	315.349	4922.612
DGRP-237	237	v	237v	x	c	c1		5	2115.066	386.444	1579.707	140.953	261.725	4081.217
DGRP-237	237	v	237v	y	c	c1		1	2769.157	836.396	2633.013	308.265	364.705	6238.566
DGRP-237	237	v	237v	y	c	c1		2	2371.162	571.484	2115.617	294.027	362.284	5058.263
DGRP-237	237	v	237v	y	c	c1		3	2476.741	563.405	2400.195	222.923	380.612	5440.341
DGRP-237	237	v	237v	y	c	c1		4	1826.694	488.328	1784.083	224.735	405.444	4099.105
DGRP-237	237	v	237v	y	c	c1		5	2322.471	500.002	2111.765	280.452	332.67	4934.238
DGRP-239	239	w	239w	x	c	c1		1	1699.814	428.02	737.291	197.585	150.955	2865.125
DGRP-239	239	w	239w	x	c	c1		2	2021.836	469.375	1700.992	208.21	213.802	4192.203
DGRP-239	239	w	239w	x	c	c1		3	2340.874	550.318	1850.645	192.244	259.341	4741.837
DGRP-239	239	w	239w	x	c	c1		4	1816.63	550.407	1376.514	189.381	213.776	3743.551
DGRP-239	239	w	239w	x	c	c1		5	2656.69	342.232	1733.802	171.556	235.958	4732.724
DGRP-239	239	w	239w	y	c	c1		1	2726.373	432.339	2368.737	210.994	210.928	5527.449
DGRP-239	239	w	239w	y	c	c1		2	3172.656	523.199	2428.156	253.437	304.017	6124.011
DGRP-239	239	w	239w	y	c	c1		3	2377.713	436.36	2567.239	193.294	245.6	5381.312
DGRP-239	239	w	239w	y	c	c1		4	1897.108	298.861	1932.714	236.421	207.222	4128.683
DGRP-239	239	w	239w	y	c	c1		5	3204.745	431.981	2227.182	165.551	272.682	5863.908
DGRP-280	280	y	280y	x	c	c1		1	2136.327	420.273	1791.778	246.326	296.776	4348.378
DGRP-280	280	y	280y	x	c	c1		2	2126.905	423.173	2385.001	302.057	267.307	4935.079
DGRP-280	280	y	280y	x	c	c1		3	2441.587	336.533	1578.927	247.832	302.291	4357.047
DGRP-280	280	y	280y	x	c	c1		4	2244.601	333.5	1684.317	244.285	288.213	4262.418
DGRP-280	280	y	280y	y	c	c1		1	2405.13	480.228	1620.489	304.16	373.672	4505.847
DGRP-280	280	y	280y	y	c	c1		2	1934.127	542.443	3015.279	293.702	297.2	5491.849
DGRP-280	280	y	280y	y	c	c1		3	2703.438	615.992	2567.73	308.933	248.806	5887.16
DGRP-280	280	y	280y	y	c	c1		4	2622.454	628.201	2018.582	312.606	307.793	5269.237
DGRP-280	280	y	280y	y	c	c1		5	2881.191	729.993	2396.369	310.285	365.727	6007.553
DGRP-287	287	z	287z	x	c	c1		1	1497.429	485.884	1956.805	181.935	257.186	3940.118
DGRP-287	287	z	287z	x	c	c1		2	1993.422	451.92	1448.116	211.149	265.049	3893.458
DGRP-287	287	z	287z	x	c	c1		3	2678.988	331.017	1704.389	210.736	276.504	4714.394
DGRP-287	287	z	287z	x	c	c1		4	440.875	1559.215	2199.871	285.3	239.723	4199.961
DGRP-287	287	z	287z	x	c	c1		5	2018.59	293.44	1444.812	231.741	284.305	3756.842
DGRP-287	287	z	287z	y	c	c1		1	2468.765	408.129	1642.191	329.954	319.345	4519.085
DGRP-287	287	z	287z	y	c	c1		2	2569.137	609.592	1972.184	268.933	274.612	5150.913
DGRP-287	287	z	287z	y	c	c1		3	2605.414	406.603	1842.047	348.688	289.096	4854.064
DGRP-287	287	z	287z	y	c	c1		4	2464.939	510.897	1614.867	341.27	283.619	4590.703
DGRP-287	287	z	287z	y	c	c1		5	2529.621	539.733	2071.064	334.74	302.105	5140.418
DGRP-307	307	p	307p	x	c	c1		1	2139.825	410.187	1472.251	216.503	250.508	4022.263
DGRP-307	307	p	307p	x	c	c1		2	1930.647	365.69	1535.649	270.189	331.645	3831.986
DGRP-307	307	p	307p	x	c	c1		3	2234.369	336.13	1480.622	254.44	270.167	4051.121
DGRP-307	307	p	307p	x	c	c1		4	2031.505	521.172	1859.784	229.961	247.464	4412.461
DGRP-307	307	p	307p	x	c	c1		5	2010.811	403.395	1645.556	287.965	250.576	4059.762
DGRP-307	307	p	307p	y	c	c1		1	2650.21	422.275	1931.676	272.564	373.727	5004.161
DGRP-307	307	p	307p	y	c	c1		2	2346.755	466.763	2179.943	196.426	283.441	4993.461
DGRP-307	307	p	307p	y	c	c1		3	2130.07	621.964	2554.912	211.431	379.369	5306.946
DGRP-307	307	p	307p	y	c	c1		4	2237.565	508.148	1985.398	177.512	253.779	4731.111
DGRP-307	307	p	307p	y	c	c1		5	2731.168	446.825	2196.033	177.037	284.763	5374.026
DGRP-317	317	a	317a	x	c	c1		1	2116.977	320.671	1811.784	111.3	135.234	4249.432
DGRP-317	317	a	317a	x	c	c1		2	2558.623	287.171	1917.911	128.48	128.014	4763.705
DGRP-317	317	a	317a	x	c	c1		3	2368.52	336.387	2324.253	141.856	155.425	5029.16
DGRP-317	317	a	317a	x	c	c1		4	2518.357	497.47	2621.992	131.727	152.069	5637.819
DGRP-317	317	a	317a	x	c	c1		5	3263.55	438.466	2350.604	132.535	149.1	6052.62
DGRP-317	317	a	317a	y	c	c1		1	2873.952	470.704	3733.264	429.511	311.821	7077.92
DGRP-317	317	a	317a	y	c	c1		2	2634.737	551.695	2951.536	286.594	353.805	6137.968
DGRP-317	317	a	317a	y	c	c1		3	2650.669	487.135	2722.995	403.592	319.977	5860.799
DGRP-317	317	a	317a	y	c	c1		4	2604.761	496.462	2714.69	306.694	256.991	5815.913
DGRP-317	317	a	317a	y	c	c1		5	2588.275	522.039	2046.133	299.626	198.9	5156.447
DGRP-318	318	b	318b	x	c	c1		1	1849.249	483.494	1594.366	208.095	256.177	3927.109
DGRP-318	318	b	318b	x	c	c1		2	1807.763	423.009	1935.623	170.317	208.629	4166.395
DGRP-318	318	b	318b	x	c	c1		3	2246.929	414.172	1932.778	238.879	270.631	4593.879
DGRP-318	318	b	318b	x	c	c1		4	1882.739	506.513	1682.405	233.119	273.041	4071.657
DGRP-318	318	b	318b	x	c	c1		5	2063.339	531.789	1728.734	207.891	263.48	4323.862
DGRP-318	318	b	318b	y	c	c1		1	2111.409	489.302	2030.983	313.363	291.524	4631.694
DGRP-318	318	b	318b	y	c	c1		2	1799.302	474.691	1741.726	229.973	258.691	4015.719
DGRP-318	318	b	318b	y	c	c1		3	1786.409	424.429	1656.425	220.677	264.676	3867.263
DGRP-318	318	b	318b	y	c	c1		4	1777.615	640.203	1369.533	304.262	337.519	3787.351
DGRP-318	318	b	318b	y	c	c1		5	2022.19	553.261	1952.723	285.902	367.371	4528.174
DGRP-320	320	d	320d	x	c	c1		1	2158.31	556.444	2482.24	180.447	279.3	5196.994
DGRP-320	320	d	320d	x	c	c1		2	2583.74	593.793	2367.57	131.125	233.571	5545.103
DGRP-320	320	d	320d	x	c	c1		3	2499.917	468.599	2272.903	180.878	212.138	5241.419
DGRP-320	320	d	320d	x	c	c1		4	2586.125	413.73	2455.721	119.85	220.995	5455.576
DGRP-320	320	d	320d	x	c	c1		5	2807.582	464.704	2530.018	145.396	213.226	5802.304
DGRP-320	320	d	320d	y	c	c1		1	2801.171	686.006	2295.532	216.208	289.8	5782.709
DGRP-320	320	d	320d	y	c	c1		2	2709.866	525.992	2845.566	255	292.659	6081.424
DGRP-320	320	d	320d	y	c	c1		3	2617.775	652.689	2697.767	252.812	291.121	5968.231
DGRP-320	320	d	320d	y	c	c1		4	2498.131	501.407	2336.273	190.282	245.993	5335.811
DGRP-320	320	d	320d	y	c	c1		5	2516.414	404.124	2339.759	195.761	226.82	5260.297
DGRP-321	321	e	321e	x	c	c1		1	2488.451	545.533	1763.365	220.902	268.613	4797.349
DGRP-321	321	e	321e	x	c	c1		2	2425.528	515.198	1653.997	209.646	182.922	4594.723
DGRP-321	321	e	321e	x	c	c1		3	2487.68	429.006	2174.146	178.268	258.523	5090.832
DGRP-321	321	e	321e	x	c	c1		4	2120.938	492.181	2410.932	259.92	237.788	5024.051
DGRP-321	321	e	321e	x	c	c1		5	2629.767	415.922	2100.134	255.981	230.439	5145.823
DGRP-321	321	e	321e	y	c	c1		1	2184.949	552.506	2350.01	271.6	380.024	5087.465
DGRP-321	321	e	321e	y	c	c1		2	2718.332	569.429	2043.012	195.37	300.794	5330.773
DGRP-321	321	e	321e	y	c	c1		3	2981.508	795.086	2452.467	262.162	352.401	6229.061
DGRP-321	321	e	321e	y	c	c1		4	2829.208	646.964	2132.649	297.861	315.527	5608.821
DGRP-321	321	e	321e	y	c	c1		5	3070.379	469.207	2024.262	326.954	333.904	5563.848
DGRP-332	332	d	332d	x	c	c1		1	1898.81	489.648	1812.028	306.152	263.211	4200.486
DGRP-332	332	d	332d	x	c	c1		2	1922.761	479.037	1738.565	280.508	344.23	4140.363
DGRP-332	332	d	332d	x	c	c1		3	1932.771	405.387	1093.155	226.177	286.812	3431.313
DGRP-332	332	d	332d	x	c	c1		4	2002.172	439.683	1670.747	284.293	269.394	4112.602
DGRP-332	332	d	332d	x	c	c1		5	1032.25	2342.864	635.285	1451.873	224.464	4010.399
DGRP-332	332	d	332d	y	c	c1		1	2891.523	326.937	1830.21	311.115	360.985	5048.67
DGRP-332	332	d	332d	y	c	c1		2	2628.456	449.152	2946.217	304.526	341.703	6023.825
DGRP-332	332	d	332d	y	c	c1		3	2538.345	621.292	2487.579	279.971	365.06	5647.216
DGRP-332	332	d	332d	y	c	c1		4	2881.441	414.145	2165.645	296.623	367.806	5461.231
DGRP-332	332	d	332d	y	c	c1		5	2762.197	638.763	2183.738	307.47	329.981	5584.698
DGRP-339	339	a	339a	x	c	c1		1	2494.662	512.182	2099.386	175.708	257.04	5106.23
DGRP-339	339	a	339a	x	c	c1		2	2182.725	376.886	2105.492	200.5	193.383	4665.103
DGRP-339	339	a	339a	x	c	c1		3	1964.063	349.738	1483.695	168.116	172.056	3797.496
DGRP-339	339	a	339a	x	c	c1		4	1899.135	409.475	2136.343	161.749	161.144	4444.953
DGRP-339	339	a	339a	x	c	c1		5	2121.362	314.502	2371.487	131.81	140.671	4807.351
DGRP-339	339	a	339a	y	c	c1		1	2020.611	476.224	2229.415	274.841	287.869	4726.25
DGRP-339	339	a	339a	y	c	c1		2	2168.936	742.981	2852.672	293.91	308.669	5764.589
DGRP-339	339	a	339a	y	c	c1		3	2029.262	429.537	1718.468	325.806	328.434	4177.267
DGRP-339	339	a	339a	y	c	c1		4	2397.97	351.233	2147.781	301.408	299.626	4896.984
DGRP-339	339	a	339a	y	c	c1		5	2203.784	442.07	2189.285	295.2	314.057	4835.139
DGRP-348	348	m	348m	x	c	c1		1	2643.715	476.475	1873.631	98.566	139.686	4993.821
DGRP-348	348	m	348m	x	c	c1		2	2412.461	462.722	1876.472	99.565	122.247	4751.655
DGRP-348	348	m	348m	x	c	c1		3	2233.428	499.204	1738.513	105.101	152.641	4471.145
DGRP-348	348	m	348m	x	c	c1		4	2176.927	427.803	2130.807	139.52	136.632	4735.537
DGRP-348	348	m	348m	x	c	c1		5	2173.032	314.563	1810.809	142.814	153.512	4298.404
DGRP-348	348	m	348m	y	c	c1		1	2695.42	762.296	2277.484	275.099	291.121	5735.2
DGRP-348	348	m	348m	y	c	c1		2	2497.197	671.431	1712.625	193.431	395.348	4881.253
DGRP-348	348	m	348m	y	c	c1		3	2652.734	825.86	2582.622	257.109	278.931	6061.216
DGRP-348	348	m	348m	y	c	c1		4	2992.506	795.385	2684.831	300.46	303.264	6472.722
DGRP-348	348	m	348m	y	c	c1		5	2452.095	743.199	2433.631	290.378	313.811	5628.925
DGRP-350	350	e	350e	x	c	c1		1	2177.039	603.854	2123.245	115.266	167.58	4904.138
DGRP-350	350	e	350e	x	c	c1		2	2062.768	380.496	1827.686	114.102	187.257	4270.95
DGRP-350	350	e	350e	x	c	c1		3	2035.627	437.588	2215.477	150.714	178.025	4688.692
DGRP-350	350	e	350e	x	c	c1		4	2062.408	524.167	1911.063	138.766	222.939	4497.638
DGRP-350	350	e	350e	x	c	c1		5	2364.595	553.646	2069.4	94.521	182	4987.641
DGRP-350	350	e	350e	y	c	c1		1	2752	698	2404	172	246	5854
DGRP-350	350	e	350e	y	c	c1		2	2722	1022	2127	113	195	5871
DGRP-350	350	e	350e	y	c	c1		3	2626	860	2533	148	240	6019
DGRP-350	350	e	350e	y	c	c1		4	2206	509	2420	198	196	5135
DGRP-352	352	f	352f	x	c	c1		1	2142	737	1599	118	248	4478
DGRP-352	352	f	352f	x	c	c1		2	2442	341	2133	189	204	4916
DGRP-352	352	f	352f	x	c	c1		3	2350	447	1938	142	233	4735
DGRP-352	352	f	352f	x	c	c1		4	2581	256	1411	189	256	4248
DGRP-352	352	f	352f	x	c	c1		5	2205	442	2358	118	150	5005
DGRP-352	352	f	352f	y	c	c1		1	2415	417	2135	235	417	4967
DGRP-352	352	f	352f	y	c	c1		2	2592	481	2677	299	332	5750
DGRP-352	352	f	352f	y	c	c1		3	2714	435	2340	387	313	5489
DGRP-352	352	f	352f	y	c	c1		4	2922	472	2074	235	278	5468
DGRP-357	357	u	357u	x	c	c1		1	2992	584	3401	153	297	6977
DGRP-357	357	u	357u	x	c	c1		2	2075	533	1905	177	234	4513
DGRP-357	357	u	357u	x	c	c1		3	2589	417	2301	199	204	5307
DGRP-357	357	u	357u	x	c	c1		4	2360	484	2051	177	233	4895
DGRP-357	357	u	357u	x	c	c1		5	2349	577	2428	220	204	5354
DGRP-357	357	u	357u	y	c	c1		1	2429	471	2471	227	286	5371
DGRP-357	357	u	357u	y	c	c1		2	2853	601	2686	193	279	6140
DGRP-357	357	u	357u	y	c	c1		3	2685	417	2622	229	350	5724
DGRP-357	357	u	357u	y	c	c1		4	2529	565	2921	228	301	6015
DGRP-357	357	u	357u	y	c	c1		5	2706	648	2445	295	399	5799
DGRP-373	373	l	373l	x	c	c1		1	2540	476	2201	223	236	5217
DGRP-373	373	l	373l	x	c	c1		2	2462	521	2387	228	253	5370
DGRP-373	373	l	373l	x	c	c1		3	2554	453	2021	247	273	5028
DGRP-373	373	l	373l	x	c	c1		4	2530	308	2162	207	259	5000
DGRP-373	373	l	373l	x	c	c1		5	2552	450	2176	241	217	5178
DGRP-373	373	l	373l	y	c	c1		1	3018	470	2334	322	352	5822
DGRP-373	373	l	373l	y	c	c1		2	2518	527	2083	352	355	5128
DGRP-373	373	l	373l	y	c	c1		3	2582	538	2221	297	254	5341
DGRP-373	373	l	373l	y	c	c1		4	2683	625	2252	308	371	5560
DGRP-373	373	l	373l	y	c	c1		5	2725	537	2280	350	438	5542
DGRP-395	395	p	395p	x	c	c1		1	2101	304	1931	85	126	4336
DGRP-395	395	p	395p	x	c	c1		2	1851	374	1730	104	181	3955
DGRP-395	395	p	395p	x	c	c1		3	1729	368	1571	102	178	3668
DGRP-395	395	p	395p	x	c	c1		4	1955	357	1824	104	181	4136
DGRP-395	395	p	395p	x	c	c1		5	1907	227	1704	136	183	3838
DGRP-395	395	p	395p	y	c	c1		1	1844	632	2191	304	302	4667
DGRP-395	395	p	395p	y	c	c1		2	2087	558	3114	262	244	5759
DGRP-395	395	p	395p	y	c	c1		3	2058	485	1840	240	384	4383
DGRP-395	395	p	395p	y	c	c1		4	2118	342	1836	288	258	4296
DGRP-395	395	p	395p	y	c	c1		5	1949	451	1678	328	286	4078
DGRP-397	397	q	397q	x	c	c1		1	2103	389	1709	136	150	4201
DGRP-397	397	q	397q	x	c	c1		2	1928	372	2202	154	129	4502
DGRP-397	397	q	397q	x	c	c1		3	1851	467	2016	143	164	4334
DGRP-397	397	q	397q	x	c	c1		4					116
DGRP-397	397	q	397q	x	c	c1		5	1942	346	1990	156	146	4278
DGRP-397	397	q	397q	y	c	c1		1	2684	545	2551	314	325	5780
DGRP-397	397	q	397q	y	c	c1		2	2762	437	2538	316	305	5737
DGRP-397	397	q	397q	y	c	c1		3	2619	555		390
DGRP-397	397	q	397q	y	c	c1		4	2856	631		229
DGRP-397	397	q	397q	y	c	c1		5	2391	503	2401	252	336	5295
DGRP-406	406	f	406f	x	c	c1		1	1835	347	1463	142	182	3645
DGRP-406	406	f	406f	x	c	c1		2	1795	360	1302	104	235	3457
DGRP-406	406	f	406f	x	c	c1		3	1591	261	1244	119	203	3096
DGRP-406	406	f	406f	x	c	c1		4	1379	195	1512	166	271	3086
DGRP-406	406	f	406f	x	c	c1		5	1553	193	1324	129	285	3070
DGRP-406	406	f	406f	y	c	c1		1	2424	445	2179	196	254	5048
DGRP-406	406	f	406f	y	c	c1		2	2145	520	2338	195	299	5003
DGRP-406	406	f	406f	y	c	c1		3	2315	465	2153	178	226	4933
DGRP-406	406	f	406f	y	c	c1		4	2613	598	2271	226	298	5482
DGRP-406	406	f	406f	y	c	c1		5	2462	506	1928	219	223	4896
DGRP-409	409	z	409z	x	c	c1		1	2826	597	1875	155	214	5298
DGRP-409	409	z	409z	x	c	c1		2	2144	460	1477	192	226	4081
DGRP-409	409	z	409z	x	c	c1		3	2471	458	1934	173	216	4863
DGRP-409	409	z	409z	x	c	c1		4	1980	385	1570	270	290	3935
DGRP-409	409	z	409z	x	c	c1		5	2424	553	1666	158	200	4643
DGRP-409	409	z	409z	y	c	c1		1				371	323	5322
DGRP-409	409	z	409z	y	c	c1		2
DGRP-409	409	z	409z	y	c	c1		3	2498	667	1925	345	317	5090
DGRP-409	409	z	409z	y	c	c1		4	2459	496	1975	371	387	4930
DGRP-409	409	z	409z	y	c	c1		5	3149	292	2023	284	280	5464
DGRP-427	427	b	427b	x	c	c1		1
DGRP-427	427	b	427b	x	c	c1		2	3060	293	1856	165	236	5209
DGRP-427	427	b	427b	x	c	c1		3	2185	404	1793	228	163	4382
DGRP-427	427	b	427b	x	c	c1		4	2000	587	2042	238	228	4629
DGRP-427	427	b	427b	x	c	c1		5	2475	504	1763	255	286	4742
DGRP-427	427	b	427b	y	c	c1		1	3640	319	2317	310	352	6276
DGRP-427	427	b	427b	y	c	c1		2	2623	439	2642	292	336	5704
DGRP-427	427	b	427b	y	c	c1		3	2340	599	2584	394	315	5523
DGRP-427	427	b	427b	y	c	c1		4	2256	383	2139	306	279	4778
DGRP-427	427	b	427b	y	c	c1		5	2689	250	2777	303	364	5716
DGRP-440	440	t	440t	x	c	c1		1	1741	244	1283	137	184	3268
DGRP-440	440	t	440t	x	c	c1		2	2606	474	2155	93	153	5235
DGRP-440	440	t	440t	x	c	c1		3	2083	455	1893	157	214	4431
DGRP-440	440	t	440t	x	c	c1		4	1956	542	2096	96	159	4594
DGRP-440	440	t	440t	x	c	c1		5	2601	641	1915	104	244	5157
DGRP-440	440	t	440t	y	c	c1		1	2939	692	2599	275	346	6230
DGRP-440	440	t	440t	y	c	c1		2	2620	556	1905	172	214	5081
DGRP-440	440	t	440t	y	c	c1		3	2264	450	825	136	183	3539
DGRP-440	440	t	440t	y	c	c1		4	2520	521	2825	199	311	5866
DGRP-440	440	t	440t	y	c	c1		5	1574	434	2568	169	286	4576
DGRP-461	461	v	461v	x	c	c1		1	1698	275	2108	197	286	4081
DGRP-461	461	v	461v	x	c	c1		2	1878	413	1838	203	193	4129
DGRP-461	461	v	461v	x	c	c1		3	1908	532	2268	243	344	4708
DGRP-461	461	v	461v	x	c	c1		4	1660	519	1626	199	166	3805
DGRP-461	461	v	461v	x	c	c1		5
DGRP-461	461	v	461v	y	c	c1		1	2202	559	2338	299	358	5099
DGRP-461	461	v	461v	y	c	c1		2	2040	523	2232	336	286	4795
DGRP-461	461	v	461v	y	c	c1		3	2155	353	2106	278	284	4614
DGRP-461	461	v	461v	y	c	c1		4	2330	619	2427	339	350	5376
DGRP-461	461	v	461v	y	c	c1		5	1985	505	2420	228	264	4910
DGRP-502	502	z	502z	x	c	c1		1	2738	720	2661	238	232	6119
DGRP-502	502	z	502z	x	c	c1		2	2635	458	2252	190	218	5345
DGRP-502	502	z	502z	x	c	c1		3	2571	542	2521	197	325	5634
DGRP-502	502	z	502z	x	c	c1		4	2061	556	2852	215	227	5469
DGRP-502	502	z	502z	x	c	c1		5	4198	404	2017	170	239	6619
DGRP-502	502	z	502z	y	c	c1		1	3145	454	2420	192	244	6019
DGRP-502	502	z	502z	y	c	c1		2	3449	632	2739	181	287	6820
DGRP-502	502	z	502z	y	c	c1		3	3184	665	2772	187	274	6621
DGRP-502	502	z	502z	y	c	c1		4	2840	687	2264	214	264	5791
DGRP-502	502	z	502z	y	c	c1		5	3559	656	2837	203	212	7052
DGRP-505	505	r	505r	x	c	c1		1	1805	274	1352	83	109	3431
DGRP-505	505	r	505r	x	c	c1		2	1964	209	1960	60	96	4133
DGRP-505	505	r	505r	x	c	c1		3	2109	308	1739	112	143	4156
DGRP-505	505	r	505r	x	c	c1		4	2161	285	1776	87	163	4222
DGRP-505	505	r	505r	x	c	c1		5	2469	408	1139	154	160	4016
DGRP-505	505	r	505r	y	c	c1		1	2710	494	2421	250	286	5625
DGRP-505	505	r	505r	y	c	c1		2	2148	421	1697	239	247	4266
DGRP-505	505	r	505r	y	c	c1		3	2415	444	2189	212	296	5048
DGRP-505	505	r	505r	y	c	c1		4	2142	410	2331	280	274	4883
DGRP-505	505	r	505r	y	c	c1		5	2641	380	2145	260	214	5166
DGRP-517	517	e	517e	x	c	c1		1	2135	365	1739	260	270	4239
DGRP-517	517	e	517e	x	c	c1		2	1965	364	1748	206	185	4077
DGRP-517	517	e	517e	x	c	c1		3	2067	313	2318	271	235	4698
DGRP-517	517	e	517e	x	c	c1		4	2396	307	1815	179	242	4518
DGRP-517	517	e	517e	x	c	c1		5	2503	387	1919	195	237	4809
DGRP-517	517	e	517e	y	c	c1		1	2424	666	1984	255	318	5074
DGRP-517	517	e	517e	y	c	c1		2	2451	631	2529	205	175	5611
DGRP-517	517	e	517e	y	c	c1		3	2552	675	2275	306	313	5502
DGRP-517	517	e	517e	y	c	c1		4	2728	531	2311	282	293	5570
DGRP-517	517	e	517e	y	c	c1		5	2479	630	2435	257	310	5544
DGRP-530	530	h	530h	x	c	c1		1	2379	365	1375	73	100	4119
DGRP-530	530	h	530h	x	c	c1		2	2248	347	1370	94	94	3965
DGRP-530	530	h	530h	x	c	c1		3	2257	400	1504	97	110	4161
DGRP-530	530	h	530h	x	c	c1		4	2243	339	1292	87	180	3874
DGRP-530	530	h	530h	x	c	c1		5	2125	444	1707	133	193	4276
DGRP-530	530	h	530h	y	c	c1		1	2535	459	1946	183	232	4940
DGRP-530	530	h	530h	y	c	c1		2	2354	402	1821	183	203	4577
DGRP-530	530	h	530h	y	c	c1		3	2377	506	2252	243	212	5135
DGRP-530	530	h	530h	y	c	c1		4	2291	607	1890	231	263	4788
DGRP-530	530	h	530h	y	c	c1		5	2304	613	2058	295	307	4975
DGRP-551	551	s	551s	x	c	c1		1	2902	608	2236	101	223	5746
DGRP-551	551	s	551s	x	c	c1		2	2411	722	1597	117	257	4730
DGRP-551	551	s	551s	x	c	c1		3	2349	458	2111	121	158	4918
DGRP-551	551	s	551s	x	c	c1		4	2555	400	1918	135	220	4873
DGRP-551	551	s	551s	y	c	c1		1	2698	630	2557	206	357	5885
DGRP-551	551	s	551s	y	c	c1		2	2331	772	2893	239	323	5996
DGRP-551	551	s	551s	y	c	c1		3	2567	475	2699	197	270	5741
DGRP-551	551	s	551s	y	c	c1		4	2662	445	2359	151	216	5466
DGRP-551	551	s	551s	y	c	c1		5	2445	597	2448	214	299	5490
DGRP-555	555	f	555f	x	c	c1		1	1568	337	2071	171	264	3976
DGRP-555	555	f	555f	x	c	c1		2	1947	389	2132	266	314	4468
DGRP-555	555	f	555f	x	c	c1		3	1821	419	2155	192	234	4395
DGRP-555	555	f	555f	x	c	c1		4	2070	314	2081	244	279	4465
DGRP-555	555	f	555f	x	c	c1		5	2573	433	2295	268	341	5301
DGRP-555	555	f	555f	y	c	c1		1	2312	396	1840	283	339	4548
DGRP-555	555	f	555f	y	c	c1		2	1926	403	2315	268	374	4644
DGRP-555	555	f	555f	y	c	c1		3	2087	441	2185	325	383	4713
DGRP-555	555	f	555f	y	c	c1		4	2215	326	2648	237	396	5189
DGRP-555	555	f	555f	y	c	c1		5	2149	431	2575	329	341	5155
DGRP-627	627	v	627v	x	c	c1		1	2540.903	548.923	2262.248	124.765	105.745	5352.074
DGRP-627	627	v	627v	x	c	c1		2	1571.355	376.287	1551.437	124.303	274.168	3499.079
DGRP-627	627	v	627v	x	c	c1		3	2230.547	278.63	1997.41	138.658	187.765	4506.587
DGRP-627	627	v	627v	x	c	c1		4	2388.401	446.382	1782.787	125.97	242.309	4617.57
DGRP-627	627	v	627v	x	c	c1		5	2632.69	553.531	1879.277	156.222	247.171	5065.498
DGRP-627	627	v	627v	y	c	c1		1	2241.613	613.744	2158.875	195.568	195.21	5014.232
DGRP-627	627	v	627v	y	c	c1		2	2504.312	579.071	2318.518	272.731	322.441	5401.901
DGRP-627	627	v	627v	y	c	c1		3	2763.011	529.254	2492.693	239.408	284.517	5784.958
DGRP-627	627	v	627v	y	c	c1		4	2984.06	666.825	2408.773	212.969	291.927	6059.658
DGRP-627	627	v	627v	y	c	c1		5	2818.756	608.925	2504.693	211.149	252.389	5932.374
DGRP-639	639	g	639g	x	c	c1		1	1920.658	358.689	1677.072	146.274	197.172	3956.419
DGRP-639	639	g	639g	x	c	c1		2	1725.699	240.885	1951.827	167.487	218.499	3918.411
DGRP-639	639	g	639g	x	c	c1		3	2123.249	331.89	1666.663	146.888	246.044	4121.802
DGRP-639	639	g	639g	x	c	c1		4	1954.9	300.39	1762.1	144.109	214.808	4017.39
DGRP-639	639	g	639g	x	c	c1		5	1808.73	395.103	1689.322	189.513	183.459	3893.155
DGRP-639	639	g	639g	y	c	c1		1	2110.5	539.328	2098.734	142.732	156.902	4748.562
DGRP-639	639	g	639g	y	c	c1		2	2303.969	594.845	1919.491	140.655	153.769	4818.305
DGRP-639	639	g	639g	y	c	c1		3	2188.233	437.816	2043.027	272.52	303.984	4669.076
DGRP-639	639	g	639g	y	c	c1		4	2175.693	268.485	2063.535	186.62	214.932	4507.713
DGRP-639	639	g	639g	y	c	c1		5	2266.852	422.832	2345.144	168.582	161.891	5034.828
DGRP-707	707	h	707h	x	c	c1		1	1655.977	410.403	1864.097	167.291	172.239	3930.477
DGRP-707	707	h	707h	x	c	c1		2	2111.189	358.509	1924.864	174.152	164.106	4394.562
DGRP-707	707	h	707h	x	c	c1		3	1716.242	389.579	1547.062	114.241	113.02	3652.883
DGRP-707	707	h	707h	x	c	c1		4	2116.457	431.923	1628.306	196.558	246.224	4176.686
DGRP-707	707	h	707h	y	c	c1		1	2236.841	471.227	2240.374	279.487	266.414	4948.442
DGRP-707	707	h	707h	y	c	c1		2	2243.272	429.217	2022.26	269.61	287.332	4694.749
DGRP-707	707	h	707h	y	c	c1		3	2031.47	429.602	2107.723	294.034	260.78	4568.795
DGRP-707	707	h	707h	y	c	c1		4	2570.577	453.206	1742.934	286.791	247.712	4766.717
DGRP-707	707	h	707h	y	c	c1		5	2641.567	630.086	2583.416	312.724	252.125	5855.069
DGRP-716	716	i	716i	x	c	c1		1	3080.853	407.181	2886.9	170.296	222.908	6374.934
DGRP-716	716	i	716i	x	c	c1		2	3028.558	567.291	2281.579	211.784	399.676	5877.428
DGRP-716	716	i	716i	x	c	c1		3	3281.954	482.757	1723.161	227.664	321.843	5487.872
DGRP-716	716	i	716i	x	c	c1		4	2348.234	362.305	1853.759	304.456	251.557	4564.298
DGRP-716	716	i	716i	x	c	c1		5	2353.323	465.358	2101.445	214.536	362.798	4920.126
DGRP-716	716	i	716i	x	c	c1		6	3040.939	602.385	2376.587	186.239	260.846	6019.911
DGRP-716	716	i	716i	y	c	c1		1	2689.175	510.367	3112.2	306.463	376.104	6311.742
DGRP-716	716	i	716i	y	c	c1		2	2536.209	570.415	2531.118	344.658	352.525	5637.742
DGRP-716	716	i	716i	y	c	c1		3	2560.672	526.589	2813.606	266.414	351.925	5900.867
DGRP-716	716	i	716i	y	c	c1		4	2721.259	618.712	2796.318	277.929	393.781	6136.289
DGRP-716	716	i	716i	y	c	c1		5	2771.24	528.819	2577.769	375.053	404.467	5877.828
DGRP-719	719	l	719l	x	c	c1		1	1759.459	402.797	1474.657	248.476	260.523	3636.913
DGRP-719	719	l	719l	x	c	c1		2	2379.861	396.188	2467.855	208.351	211.684	5243.904
DGRP-719	719	l	719l	x	c	c1		3	2215.95	447.667	1758.059	189.264	255.042	4421.676
DGRP-719	719	l	719l	x	c	c1		4	2004.299	434.182	1865.426	161.612	261.829	4303.907
DGRP-719	719	l	719l	x	c	c1		5				166.564	276.51
DGRP-719	719	l	719l	y	c	c1		1	2569.054	445.215	2146.19	252.369	265.199	5160.459
DGRP-719	719	l	719l	y	c	c1		2	2637.07	436.799	2076.537	236.726	248.85	5150.406
DGRP-719	719	l	719l	y	c	c1		3	2322.08	580.93	2378.203	268.599	293.052	5281.213
DGRP-719	719	l	719l	y	c	c1		4	2582.495	642.222	2472.429	256.644	362.3	5697.146
DGRP-719	719	l	719l	y	c	c1		5	2330.546	401.712	2525.937	231.553	279.568	5258.195
DGRP-748	748	m	748m	x	c	c1		1	2346.375	400.947	2441.472	169.206	158.043	5188.794
DGRP-748	748	m	748m	x	c	c1		2	2151.022	402.446	2110.516	162.524	165.661	4663.984
DGRP-748	748	m	748m	x	c	c1		3	2190.86	346.592	2106.7	133.027	123.538	4644.152
DGRP-748	748	m	748m	x	c	c1		4	2214.022	470.297	1844.392	136.804	157.585	4528.711
DGRP-748	748	m	748m	x	c	c1		5	2779.881	478.158	2294.371	109.707	159.076	5552.41
DGRP-748	748	m	748m	y	c	c1		1	2839.04	538.912	2404.761	208.557	221.498	5782.713
DGRP-748	748	m	748m	y	c	c1		2	2215.995	512.603	2793.364	246.863	241.272	5521.962
DGRP-748	748	m	748m	y	c	c1		3	2478.194	518.804	2847.091	276.404	258.512	5844.089
DGRP-748	748	m	748m	y	c	c1		4	2778.19	598.236	2473.465	211.507	205.915	5849.891
DGRP-748	748	m	748m	y	c	c1		5	2593.555	632.514	2175.096	159.223	177.766	5401.165
DGRP-757	757	n	757n	x	c	c1		1	1667.429	468.612	1648.658	156.208	164.786	3784.699
DGRP-757	757	n	757n	x	c	c1		2	1936.339	449.868	1808.717	188.041	189.169	4194.924
DGRP-757	757	n	757n	x	c	c1		3	1918.765	317.388	1501.137	179.965	209.552	3737.29
DGRP-757	757	n	757n	x	c	c1		4	1680.568	377.356	1405.535	139.851	217.664	3463.459
DGRP-757	757	n	757n	x	c	c1		5	1987.616	398.105	1779.866	155.613	162.122	4165.587
DGRP-757	757	n	757n	x	c	c1		6	1905.083	454.686	1871.661	111.462	148.659	4231.43
DGRP-757	757	n	757n	y	c	c1		1	2152.747	511.3	2413.754	157.47	203.342	5077.801
DGRP-757	757	n	757n	y	c	c1		2	2143.655	409.021	1393.982	150.073	166.333	3946.658
DGRP-757	757	n	757n	y	c	c1		3	2167.377	458.481	2350.511	180.591	243.184	4976.369
DGRP-757	757	n	757n	y	c	c1		4	2212.506	609.283	2139.216	192.978	256.316	4961.005
DGRP-757	757	n	757n	y	c	c1		5	1718.196	494.177	2322.615	232.691	266.023	4534.988
DGRP-761	761	o	761o	x	c	c1		1	2070.196	391.265	1778.137	142.888	172.324	4239.598
DGRP-761	761	o	761o	x	c	c1		2	1909.811	390.399	1704.726	128.256	150.674	4004.936
DGRP-761	761	o	761o	x	c	c1		3	2021.781	419.811	1703.451	145.541	219.021	4145.043
DGRP-761	761	o	761o	x	c	c1		4	1723.191	454.965	1524.06	168.551	246.964	3702.216
DGRP-761	761	o	761o	x	c	c1		5	2262.819	528.946	1580.312	247.525	363.49	4372.077
DGRP-761	761	o	761o	y	c	c1		1	2039.646	608.135	1983.042	214.799	225.94	4630.823
DGRP-761	761	o	761o	y	c	c1		2	2195.95	434.683	1743.231	217.721	253.648	4373.864
DGRP-761	761	o	761o	y	c	c1		3	2335.909	419.688	1841.968	220.469	240.413	4597.565
DGRP-761	761	o	761o	y	c	c1		4	2574.875	543.636	1852.431	205.626	226.185	4970.942
DGRP-761	761	o	761o	y	c	c1		5	2759.175	602.298	2383.253	258.707	397.455	5744.726
DGRP-765	765	l	765l	x	c	c1		1	2833.355	246.672	1606.065	121.948	154.635	4686.092
DGRP-765	765	l	765l	x	c	c1		2	2628.345	469.695	2644.306	119.324	187.993	5742.346
DGRP-765	765	l	765l	x	c	c1		3	1994.226	548.174	2356.897	106.38	161.765	4899.297
DGRP-765	765	l	765l	x	c	c1		4	2633.109	295.417	2635.678	138.831	165.554	5564.204
DGRP-765	765	l	765l	x	c	c1		5	2759.727	525.969	2224.364	143.539	177.332	5510.06
DGRP-765	765	l	765l	y	c	c1		1	2721.292	553.061	2475.238	183.373	192	5749.591
DGRP-765	765	l	765l	y	c	c1		2	2395.216	628.783	2582.385	255.718	297.317	5606.384
DGRP-765	765	l	765l	y	c	c1		3	2515.419	605.477	1874.311	266.968	255.86	4995.207
DGRP-774	774	m	774m	x	c	c1		1	2163.739	432.946	2080.522	141.508	167.737	4677.207
DGRP-774	774	m	774m	x	c	c1		2	1745.622	320.926	1593.469	123.9	142.926	3660.017
DGRP-774	774	m	774m	x	c	c1		3	2061.331	322.094	1793.88	144.774	135.127	4177.305
DGRP-774	774	m	774m	x	c	c1		4	1581.657	377.078	1754.141	110.366	161.372	3712.876
DGRP-774	774	m	774m	x	c	c1		5	1930.951	403.816	2393.263	120.429	182.68	4728.03
DGRP-774	774	m	774m	y	c	c1		1	2658.975	480.178	2953.569	247.409	359.281	6092.722
DGRP-774	774	m	774m	y	c	c1		2	1779.394	613.112	2401.111	212.755	325.223	4793.617
DGRP-774	774	m	774m	y	c	c1		3	2447.934	423.161	2312.207	217.627	268.961	5183.302
DGRP-774	774	m	774m	y	c	c1		4	2273.141	603.028	2899.046	240.988	284.22	5775.215
DGRP-774	774	m	774m	y	c	c1		5	2279.01	631.698	2548.4	254.485	317.788	5459.108
DGRP-776	776	l	776l	x	c	c1		1	2747.618	413.266	2042.161	130	159.668	5203.045
DGRP-776	776	l	776l	x	c	c1		2	2358.485	332.052	2081.518	127.009	212.505	4772.055
DGRP-776	776	l	776l	x	c	c1		3	2546.359	355.195	1941.997	130.712	156.136	4843.551
DGRP-776	776	l	776l	x	c	c1		4	2312.127	416.17	2321.395	114.371	214.371	5049.692
DGRP-776	776	l	776l	x	c	c1		5	2136.199	508.185	2288.362	146.831	207.815	4932.746
DGRP-776	776	l	776l	y	c	c1		1	2477.04	448.013	2103.63	199.594	278.129	5028.683
DGRP-776	776	l	776l	y	c	c1		2	2419.811	508.966	2862.329	227.117	345.909	5791.106
DGRP-776	776	l	776l	y	c	c1		3	2295.094	549.57	2857.681	194.585	289.901	5702.345
DGRP-776	776	l	776l	y	c	c1		4	2426.994	566.168	2704.781	184.27	321.65	5697.943
DGRP-776	776	l	776l	y	c	c1		5	2860.148	506.202	2801.472	232.906	345.495	6167.822
DGRP-786	786	n	786n	x	c	c1		1	2239.384	452.095	1847.766	190.439	194.202	4539.245
DGRP-786	786	n	786n	x	c	c1		2	2621.075	359.227	1939.459	202.402	231.076	4919.761
DGRP-786	786	n	786n	x	c	c1		3	2362.436	510.736	1799.283	265.083	261.385	4672.455
DGRP-786	786	n	786n	x	c	c1		4	2164.674	504.62	1840.666	285.135	237.713	4509.96
DGRP-786	786	n	786n	x	c	c1		5	2641.839	471.234	2185.487	251.531	207.291	5298.56
DGRP-786	786	n	786n	y	c	c1		1	2512.998	416.737	2214.716	190.439	194.232	5144.451
DGRP-786	786	n	786n	y	c	c1		2	2124.296	443.81	1666.644	224.842	223.512	4234.75
DGRP-786	786	n	786n	y	c	c1		3	2371.782	531.855	1780.251	215.45	282.064	4683.888
DGRP-786	786	n	786n	y	c	c1		4	2464.609	510.097	1906.154	231.572	329.046	4880.86
DGRP-786	786	n	786n	y	c	c1		5	2650.81	450.919	1784.177	251.464	290.124	4885.906
DGRP-787	787	q	787q	x	c	c1		1	2833.083	516.14	2357.425	215.309	271.505	5706.648
DGRP-787	787	q	787q	x	c	c1		2	2659.309	300.59	2218.702	216.727	262.084	5178.601
DGRP-787	787	q	787q	x	c	c1		3	2381.549	425.976	2829.219	225.274	226.979	5636.744
DGRP-787	787	q	787q	x	c	c1		4	2006.883	432.774	2627.891	236.208	268.147	5067.548
DGRP-787	787	q	787q	x	c	c1		5	2753.517	417.103	3025.458	255.463	222.05	6196.078
DGRP-787	787	q	787q	y	c	c1		1	2834.814	468.157	3427.904	273.784	306.881	6730.875
DGRP-787	787	q	787q	y	c	c1		2	2305.127	536.204	3985.364	307.665	326.902	6826.695
DGRP-787	787	q	787q	y	c	c1		3	2833.237	384.713	3269.047	246.44	307.65	6486.997
DGRP-787	787	q	787q	y	c	c1		4	2733.481	406.673	2833.889	279.204	322.905	5974.043
DGRP-787	787	q	787q	y	c	c1		5	2669.888	548.247	3017.672	241.872	330.82	6235.807
DGRP-801	801	s	801s	x	c	c1		1	3090.747	375.384	2031.122	204.899	241.272	5497.253
DGRP-801	801	s	801s	x	c	c1		2	2901.732	379.067	2216.927	240.541	260.224	5497.726
DGRP-801	801	s	801s	x	c	c1		3	3177.173	569.371	1531.778	230.372	181.285	5278.322
DGRP-801	801	s	801s	x	c	c1		4	3514.097	416.439	2477.011	149.983	128.265	6407.547
DGRP-801	801	s	801s	y	c	c1		1	3649.272	627.273	2110.785	202.25	302.352	6387.33
DGRP-801	801	s	801s	y	c	c1		2	2840.918	370.195	2401.726	217.546	270.496	5612.839
DGRP-801	801	s	801s	y	c	c1		3	2655.684	653.305	2399.973	168.6	309.634	5708.962
DGRP-801	801	s	801s	y	c	c1		4	2885.005	561.229	2601.436	251.606	267.146	6047.67
DGRP-801	801	s	801s	y	c	c1		5	3282.403	685.846	2411.439	215.132	249.858	6379.688
DGRP-802	802	t	802t	x	c	c1		1	2590.16	368.144	1833.884	141.867	166.87	4792.188
DGRP-802	802	t	802t	x	c	c1		2	2427.47	279.25	1730.381	199.179	150.681	4437.101
DGRP-802	802	t	802t	x	c	c1		3				147.489	208.394
DGRP-802	802	t	802t	x	c	c1		4				134.196	215.683
DGRP-802	802	t	802t	x	c	c1		5				170.147	163.686
DGRP-802	802	t	802t	y	c	c1		1	2749.733	679.164	2933.203	339.791	316.42	6362.1
DGRP-802	802	t	802t	y	c	c1		2	2510.893	632.749	2454.437	324.186	308.68	5598.079
DGRP-802	802	t	802t	y	c	c1		3	1979.889	635.659	3024.523	274.257	306.904	5640.071
DGRP-802	802	t	802t	y	c	c1		4	2173.639	484.157	1819.897	280.364	234.374	4477.693
DGRP-802	802	t	802t	y	c	c1		5	2661.576	566.406	2370.869	283.643	293.702	5598.851
DGRP-808	808	v	808v	x	c	c1		1	2430.059	471.854	2402.292	236.421	246.862	5304.205
DGRP-808	808	v	808v	x	c	c1		2	2216.775	420.726	1962.025	235.485	299.462	4599.526
DGRP-808	808	v	808v	x	c	c1		3	2807.295	433.686	1950.262	282.866	233.788	5191.243
DGRP-808	808	v	808v	x	c	c1		4	2571.567	457.861	2184.816	222.6	203.053	5214.244
DGRP-808	808	v	808v	x	c	c1		5	2618.84	493.974	1932.4	355.17	247.867	5045.214
DGRP-808	808	v	808v	y	c	c1		1	3076.284	583.184	2779.368	302.398	266.305	6438.836
DGRP-808	808	v	808v	y	c	c1		2	3056.506	446.38	2561.071	271.57	310.689	6063.957
DGRP-808	808	v	808v	y	c	c1		3	2903.498	487.263	2724.558	300.25	278.755	6115.319
DGRP-808	808	v	808v	y	c	c1		4	3583.67	400.379	2867.736	324.926	311.64	6851.785
DGRP-808	808	v	808v	y	c	c1		5	3537.293	485.085	2584.969	321.804	313.591	6607.347
DGRP-821	821	a	821a	x	c	c1		1	2370.466	474.467	1892.571	131.212	113.1	4737.504
DGRP-821	821	a	821a	x	c	c1		2	2341.837	300.256	1432.496	118.12	154.893	4074.589
DGRP-821	821	a	821a	y	c	c1		1	2049.221	394.02	1846.112	155.063	164.419	4289.353
DGRP-821	821	a	821a	y	c	c1		2	1518.129	338.294	1771.121	109.753	153.444	3627.544
DGRP-821	821	a	821a	y	c	c1		3	2319.452	604.574	1572.925	157.26	160.723	4496.951
DGRP-821	821	a	821a	y	c	c1		4	2461.085	313.571	1690.764	113.422	127.327	4465.42
DGRP-821	821	a	821a	y	c	c1		5	3127.538	457.672	2120.232	139.453	137.521	5705.442
DGRP-853	853	h	853h	x	c	c1		1	2760.237	504.963	2171.716	155.721	226.967	5436.916
DGRP-853	853	h	853h	x	c	c1		2	3046.461	469.434	2371.329	189.62	264.287	5887.224
DGRP-853	853	h	853h	x	c	c1		3	2690.893	347.223	1720.432	146.034	198.211	4758.548
DGRP-853	853	h	853h	x	c	c1		4	2722.32	605.415	2455.321	133.686	193.385	5783.056
DGRP-853	853	h	853h	x	c	c1		5	2666.326	291.668	1989.481	148.189	195.826	4947.475
DGRP-853	853	h	853h	y	c	c1		1	2828.192	415.387	2006.935	186.816	202.691	5250.514
DGRP-853	853	h	853h	y	c	c1		2	2478.388	274.884	1889.166	168.266	163.91	4642.438
DGRP-853	853	h	853h	y	c	c1		3	2857.084	349.394	1914.433	138.807	171.556	5120.911
DGRP-853	853	h	853h	y	c	c1		4	2843.423	356.369	1677.037	252.071	295.683	4876.829
DGRP-853	853	h	853h	y	c	c1		5	2910.31	460.344	2284.391	161.587	221.935	5655.045
[truncated: 2,604 more rows]
