# Supplementary material for: Multiscale analysis reveals that diet-dependent midgut plasticity emerges from alterations in both stem cell niche coupling and enterocyte size
Source: eLife. 2021 Sep 23;10:e64125. doi: 10.7554/eLife.64125 (PMC8528489; doi:10.7554/eLife.64125)
Supplement: Figure 2—figure supplement 1—source data 1. [file elife-64125-fig2-figsupp1-data1.csv]

Sugar	Yeast	Conc	Calories
16.81	1.185	16.81x1.185	69
255.9566546	18.04334537	255.956654626285x18.0433453737149	1060.38
168.1	11.85	168.1x11.85	696.4065
74.1	5.223587151	74.1x5.22358715050565	306
110.4306569	69.56934307	110.430656934307x69.5693430656934	696.4065
11.04306569	6.956934307	11.0430656934307x6.95693430656934	69
32.65487671	46.66871044	32.6548767102915x46.6687104402141	306
48.66531022	30.65827693	48.6653102189782x30.6582769315275	306
7.4	10.59	7.4x10.59	69
74.1	105.9	74.1x105.9	696.4065
168.1	105.9	168.1x105.9	1060.38
112.7966667	161.2033333	112.796666666667x161.203333333333	1060.38
17.99833333	0	17.9983333333333x0	69
79.32358715	0	79.3235871505056x0	306
179.9833333	0	179.983333333333x0	696.4065
274	0	274x0	1060.38
0	17.99833333	0x17.9983333333333	69
0	79.32358715	0x79.3235871505056	306
0	179.9833333	0x179.983333333333	696.4065
0	274	0x274	1060.38
74.1	46.66871044	74.1x46.6687104402141	467
168.1	46.66871044	168.1x46.6687104402141	831
220	46.66871044	220x46.6687104402141	1032
220	105.9	220x105.9	1261
168.1	161.2033333	168.1x161.203333333333	1274
255.9566546	161.2033333	255.956654626285x161.203333333333	1614
155	25	155x25	696.4065
133	46.66871044	133x46.6687104402141	696.4065
