# Supplementary material for: Multiscale analysis reveals that diet-dependent midgut plasticity emerges from alterations in both stem cell niche coupling and enterocyte size
Source: eLife. 2021 Sep 23;10:e64125. doi: 10.7554/eLife.64125 (PMC8528489; doi:10.7554/eLife.64125)
Supplement: Figure 2—figure supplement 1—source data 3. [file elife-64125-fig2-figsupp1-data3.csv]

Line	Repeat	GutNumber	midgut_length	Yeast in Diet	Sucrose in Diet	concatenate	Calories	Absorbance	ingested_sucrose	ingested_yeast	ingested_calories
CantonS	1	1	4439.311	17.99833333	0	A	69	1.154	0	20.77007667	79.626
CantonS	1	2	5199.313	17.99833333	0	A	69	1.154	0	20.77007667	79.626
CantonS	1	3	4767.982	17.99833333	0	A	69	1.154	0	20.77007667	79.626
CantonS	1	4	5584.93	17.99833333	0	A	69	1.154	0	20.77007667	79.626
CantonS	1	5	5462.993	17.99833333	0	A	69	1.154	0	20.77007667	79.626
CantonS	1	6	3912.343	17.99833333	0	A	69	1.154	0	20.77007667	79.626
CantonS	1	7	4941.714	17.99833333	0	A	69	1.154	0	20.77007667	79.626
CantonS	1	8	4802.726	17.99833333	0	A	69	1.154	0	20.77007667	79.626
CantonS	1	9	4872.521	17.99833333	0	A	69	1.154	0	20.77007667	79.626
CantonS	2	1	5039.147	17.99833333	0	A	69	1.154	0	20.77007667	79.626
CantonS	2	2	5184.451	17.99833333	0	A	69	1.154	0	20.77007667	79.626
CantonS	2	3	4354.011	17.99833333	0	A	69	1.154	0	20.77007667	79.626
CantonS	2	4	3970.557	17.99833333	0	A	69	1.154	0	20.77007667	79.626
CantonS	2	5	5482.484	17.99833333	0	A	69	1.154	0	20.77007667	79.626
CantonS	2	6	5148.34	17.99833333	0	A	69	1.154	0	20.77007667	79.626
CantonS	2	7	4998.338	17.99833333	0	A	69	1.154	0	20.77007667	79.626
CantonS	3	1	5783.703	17.99833333	0	A	69	1.154	0	20.77007667	79.626
CantonS	3	2	5240.321	17.99833333	0	A	69	1.154	0	20.77007667	79.626
CantonS	3	3	4857.064	17.99833333	0	A	69	1.154	0	20.77007667	79.626
CantonS	3	4	6717.365	17.99833333	0	A	69	1.154	0	20.77007667	79.626
CantonS	3	5	5536.31	17.99833333	0	A	69	1.154	0	20.77007667	79.626
CantonS	3	6	6366.411	17.99833333	0	A	69	1.154	0	20.77007667	79.626
CantonS	3	7	5197.366	17.99833333	0	A	69	1.154	0	20.77007667	79.626
CantonS	3	8	5552.69	17.99833333	0	A	69	1.154	0	20.77007667	79.626
CantonS	1	1	5682.248	179.9833333	0	B	696.4065	0.201	0	36.17665	139.9777065
CantonS	1	2	6013.04	179.9833333	0	B	696.4065	0.201	0	36.17665	139.9777065
CantonS	1	3	6484.283	179.9833333	0	B	696.4065	0.201	0	36.17665	139.9777065
CantonS	1	4	5893.047	179.9833333	0	B	696.4065	0.201	0	36.17665	139.9777065
CantonS	1	5	6884.886	179.9833333	0	B	696.4065	0.201	0	36.17665	139.9777065
CantonS	1	6	6214.075	179.9833333	0	B	696.4065	0.201	0	36.17665	139.9777065
CantonS	1	7	5436.777	179.9833333	0	B	696.4065	0.201	0	36.17665	139.9777065
CantonS	1	8	6290.896	179.9833333	0	B	696.4065	0.201	0	36.17665	139.9777065
CantonS	2	1	5998.203	179.9833333	0	B	696.4065	0.201	0	36.17665	139.9777065
CantonS	2	2	6115.209	179.9833333	0	B	696.4065	0.201	0	36.17665	139.9777065
CantonS	2	3	5120.446	179.9833333	0	B	696.4065	0.201	0	36.17665	139.9777065
CantonS	2	4	6151.17	179.9833333	0	B	696.4065	0.201	0	36.17665	139.9777065
CantonS	2	5	4718.654	179.9833333	0	B	696.4065	0.201	0	36.17665	139.9777065
CantonS	2	6	6319.669	179.9833333	0	B	696.4065	0.201	0	36.17665	139.9777065
CantonS	2	7	5919.922	179.9833333	0	B	696.4065	0.201	0	36.17665	139.9777065
CantonS	2	8	6497.603	179.9833333	0	B	696.4065	0.201	0	36.17665	139.9777065
CantonS	2	9	4695.057	179.9833333	0	B	696.4065	0.201	0	36.17665	139.9777065
CantonS	3	1	5835.075	179.9833333	0	B	696.4065	0.201	0	36.17665	139.9777065
CantonS	3	4	5429.108	179.9833333	0	B	696.4065	0.201	0	36.17665	139.9777065
CantonS	3	5	6434.907	179.9833333	0	B	696.4065	0.201	0	36.17665	139.9777065
CantonS	3	6	5407.147	179.9833333	0	B	696.4065	0.201	0	36.17665	139.9777065
CantonS	3	7	6239.528	179.9833333	0	B	696.4065	0.201	0	36.17665	139.9777065
CantonS	1	1	4971.61	274	0	C	1060.38	0.172	0	47.128	182.38536
CantonS	1	2	4616.524	274	0	C	1060.38	0.172	0	47.128	182.38536
CantonS	1	3	5656.407	274	0	C	1060.38	0.172	0	47.128	182.38536
CantonS	1	4	5279.937	274	0	C	1060.38	0.172	0	47.128	182.38536
CantonS	1	5	5165.446	274	0	C	1060.38	0.172	0	47.128	182.38536
CantonS	1	6	4420.627	274	0	C	1060.38	0.172	0	47.128	182.38536
CantonS	1	7	5819.234	274	0	C	1060.38	0.172	0	47.128	182.38536
CantonS	1	8	5346.477	274	0	C	1060.38	0.172	0	47.128	182.38536
CantonS	2	1	4346.799	274	0	C	1060.38	0.172	0	47.128	182.38536
CantonS	2	2	5046.941	274	0	C	1060.38	0.172	0	47.128	182.38536
CantonS	2	3	5159.778	274	0	C	1060.38	0.172	0	47.128	182.38536
CantonS	2	4	4019.476	274	0	C	1060.38	0.172	0	47.128	182.38536
CantonS	2	5	4309.073	274	0	C	1060.38	0.172	0	47.128	182.38536
CantonS	2	6	3750.833	274	0	C	1060.38	0.172	0	47.128	182.38536
CantonS	2	7	5228.55	274	0	C	1060.38	0.172	0	47.128	182.38536
CantonS	2	8	5557.368	274	0	C	1060.38	0.172	0	47.128	182.38536
CantonS	2	9	6109.342	274	0	C	1060.38	0.172	0	47.128	182.38536
CantonS	3	1		274	0	C	1060.38	0.172	0	47.128	182.38536
CantonS	3	2	5406.15	274	0	C	1060.38	0.172	0	47.128	182.38536
CantonS	3	3	5542.231	274	0	C	1060.38	0.172	0	47.128	182.38536
CantonS	3	4	6148.439	274	0	C	1060.38	0.172	0	47.128	182.38536
CantonS	3	5	6078.959	274	0	C	1060.38	0.172	0	47.128	182.38536
CantonS	3	6	5601.331	274	0	C	1060.38	0.172	0	47.128	182.38536
CantonS	3	7	6331.895	274	0	C	1060.38	0.172	0	47.128	182.38536
CantonS	3	8	5678.081	274	0	C	1060.38	0.172	0	47.128	182.38536
CantonS	1	1	5204.895	79.32358715	0	D	306	0.206	0	16.34065895	63.036
CantonS	1	2	6090.867	79.32358715	0	D	306	0.206	0	16.34065895	63.036
CantonS	1	3	5959.941	79.32358715	0	D	306	0.206	0	16.34065895	63.036
CantonS	1	4	5879.057	79.32358715	0	D	306	0.206	0	16.34065895	63.036
CantonS	1	5	6925.9	79.32358715	0	D	306	0.206	0	16.34065895	63.036
CantonS	1	6	6367.757	79.32358715	0	D	306	0.206	0	16.34065895	63.036
CantonS	1	7	5524.289	79.32358715	0	D	306	0.206	0	16.34065895	63.036
CantonS	1	8	6075.489	79.32358715	0	D	306	0.206	0	16.34065895	63.036
CantonS	2	1	5555.25	79.32358715	0	D	306	0.206	0	16.34065895	63.036
CantonS	2	2	4539.499	79.32358715	0	D	306	0.206	0	16.34065895	63.036
CantonS	2	3	5051.06	79.32358715	0	D	306	0.206	0	16.34065895	63.036
CantonS	2	4	4743.403	79.32358715	0	D	306	0.206	0	16.34065895	63.036
CantonS	2	5	5711.964	79.32358715	0	D	306	0.206	0	16.34065895	63.036
CantonS	2	6	6014.255	79.32358715	0	D	306	0.206	0	16.34065895	63.036
CantonS	2	7	5700.011	79.32358715	0	D	306	0.206	0	16.34065895	63.036
CantonS	3	1	5199.832	79.32358715	0	D	306	0.206	0	16.34065895	63.036
CantonS	3	2	5322.683	79.32358715	0	D	306	0.206	0	16.34065895	63.036
CantonS	3	3	5067.235	79.32358715	0	D	306	0.206	0	16.34065895	63.036
CantonS	3	4	5407.89	79.32358715	0	D	306	0.206	0	16.34065895	63.036
CantonS	3	5	6562.068	79.32358715	0	D	306	0.206	0	16.34065895	63.036
CantonS	3	6	7003.747	79.32358715	0	D	306	0.206	0	16.34065895	63.036
CantonS	3	7	5345.187	79.32358715	0	D	306	0.206	0	16.34065895	63.036
CantonS	1	1	5415.931019	6.956934307	11.04306569	E	69	1.443	15.9351438	10.0388562	99.567
CantonS	1	2	5051.592176	6.956934307	11.04306569	E	69	1.443	15.9351438	10.0388562	99.567
CantonS	1	3	4918.696635	6.956934307	11.04306569	E	69	1.443	15.9351438	10.0388562	99.567
CantonS	1	4	4830.464442	6.956934307	11.04306569	E	69	1.443	15.9351438	10.0388562	99.567
CantonS	1	5	4771.773377	6.956934307	11.04306569	E	69	1.443	15.9351438	10.0388562	99.567
CantonS	1	6	4888.917256	6.956934307	11.04306569	E	69	1.443	15.9351438	10.0388562	99.567
CantonS	1	7	5343.698103	6.956934307	11.04306569	E	69	1.443	15.9351438	10.0388562	99.567
CantonS	1	8	5275.875444	6.956934307	11.04306569	E	69	1.443	15.9351438	10.0388562	99.567
CantonS	1	9	4362.594318	6.956934307	11.04306569	E	69	1.443	15.9351438	10.0388562	99.567
CantonS	1	10	5088.380733	6.956934307	11.04306569	E	69	1.443	15.9351438	10.0388562	99.567
CantonS	1	11	4367.167918	6.956934307	11.04306569	E	69	1.443	15.9351438	10.0388562	99.567
CantonS	2	1	4762.756227	6.956934307	11.04306569	E	69	1.443	15.9351438	10.0388562	99.567
CantonS	2	2	4556.424027	6.956934307	11.04306569	E	69	1.443	15.9351438	10.0388562	99.567
CantonS	2	3	4513.509593	6.956934307	11.04306569	E	69	1.443	15.9351438	10.0388562	99.567
CantonS	2	4	4709.085093	6.956934307	11.04306569	E	69	1.443	15.9351438	10.0388562	99.567
CantonS	2	5	4064.667351	6.956934307	11.04306569	E	69	1.443	15.9351438	10.0388562	99.567
CantonS	2	6	4578.67611	6.956934307	11.04306569	E	69	1.443	15.9351438	10.0388562	99.567
CantonS	2	7	4922.779166	6.956934307	11.04306569	E	69	1.443	15.9351438	10.0388562	99.567
CantonS	2	8		6.956934307	11.04306569	E	69	1.443	15.9351438	10.0388562	99.567
CantonS	2	9	3985.519934	6.956934307	11.04306569	E	69	1.443	15.9351438	10.0388562	99.567
CantonS	3	1	4247.905784	6.956934307	11.04306569	E	69	1.443	15.9351438	10.0388562	99.567
CantonS	3	2	5109.777606	6.956934307	11.04306569	E	69	1.443	15.9351438	10.0388562	99.567
CantonS	3	3	4187.723825	6.956934307	11.04306569	E	69	1.443	15.9351438	10.0388562	99.567
CantonS	3	4	4790.756522	6.956934307	11.04306569	E	69	1.443	15.9351438	10.0388562	99.567
CantonS	3	5	4543.694728	6.956934307	11.04306569	E	69	1.443	15.9351438	10.0388562	99.567
CantonS	3	6	4146.534375	6.956934307	11.04306569	E	69	1.443	15.9351438	10.0388562	99.567
CantonS	3	7	3978.796867	6.956934307	11.04306569	E	69	1.443	15.9351438	10.0388562	99.567
CantonS	3	8	3809.439455	6.956934307	11.04306569	E	69	1.443	15.9351438	10.0388562	99.567
CantonS	1	1	6643.210177	69.56934307	110.4306569	F	696.4065	0.114	12.58909489	7.930905109	79.390341
CantonS	1	2	5247.036586	69.56934307	110.4306569	F	696.4065	0.114	12.58909489	7.930905109	79.390341
CantonS	1	3	5178.400334	69.56934307	110.4306569	F	696.4065	0.114	12.58909489	7.930905109	79.390341
CantonS	1	4	4924.692463	69.56934307	110.4306569	F	696.4065	0.114	12.58909489	7.930905109	79.390341
CantonS	1	5	6199.513755	69.56934307	110.4306569	F	696.4065	0.114	12.58909489	7.930905109	79.390341
CantonS	1	6	5711.442177	69.56934307	110.4306569	F	696.4065	0.114	12.58909489	7.930905109	79.390341
CantonS	1	7	6889.12857	69.56934307	110.4306569	F	696.4065	0.114	12.58909489	7.930905109	79.390341
CantonS	1	8	4648.895852	69.56934307	110.4306569	F	696.4065	0.114	12.58909489	7.930905109	79.390341
CantonS	1	9	5979.876915	69.56934307	110.4306569	F	696.4065	0.114	12.58909489	7.930905109	79.390341
CantonS	2	1	6786.472266	69.56934307	110.4306569	F	696.4065	0.114	12.58909489	7.930905109	79.390341
CantonS	2	2	5623.496094	69.56934307	110.4306569	F	696.4065	0.114	12.58909489	7.930905109	79.390341
CantonS	2	3	5543.866971	69.56934307	110.4306569	F	696.4065	0.114	12.58909489	7.930905109	79.390341
CantonS	2	4		69.56934307	110.4306569	F	696.4065	0.114	12.58909489	7.930905109	79.390341
CantonS	2	5	6349.77982	69.56934307	110.4306569	F	696.4065	0.114	12.58909489	7.930905109	79.390341
CantonS	2	6	6722.915248	69.56934307	110.4306569	F	696.4065	0.114	12.58909489	7.930905109	79.390341
CantonS	2	7	4347.47418	69.56934307	110.4306569	F	696.4065	0.114	12.58909489	7.930905109	79.390341
CantonS	2	8	6051.047583	69.56934307	110.4306569	F	696.4065	0.114	12.58909489	7.930905109	79.390341
CantonS	2	9	6348.374239	69.56934307	110.4306569	F	696.4065	0.114	12.58909489	7.930905109	79.390341
CantonS	3	1	7661.942121	69.56934307	110.4306569	F	696.4065	0.114	12.58909489	7.930905109	79.390341
CantonS	3	2	5434.87567	69.56934307	110.4306569	F	696.4065	0.114	12.58909489	7.930905109	79.390341
CantonS	3	3	6066.869991	69.56934307	110.4306569	F	696.4065	0.114	12.58909489	7.930905109	79.390341
CantonS	3	4	6150.722099	69.56934307	110.4306569	F	696.4065	0.114	12.58909489	7.930905109	79.390341
CantonS	3	5	5083.573043	69.56934307	110.4306569	F	696.4065	0.114	12.58909489	7.930905109	79.390341
CantonS	3	6		69.56934307	110.4306569	F	696.4065	0.114	12.58909489	7.930905109	79.390341
CantonS	3	7	6102.829349	69.56934307	110.4306569	F	696.4065	0.114	12.58909489	7.930905109	79.390341
CantonS	3	8		69.56934307	110.4306569	F	696.4065	0.114	12.58909489	7.930905109	79.390341
CantonS	3	9	5386.972516	69.56934307	110.4306569	F	696.4065	0.114	12.58909489	7.930905109	79.390341
CantonS	1	1	7254.841782	161.2033333	112.7966667	G	1060.38	0.24	27.0712	38.6888	254.4912
CantonS	1	2	5677.51264	161.2033333	112.7966667	G	1060.38	0.24	27.0712	38.6888	254.4912
CantonS	1	3	6901.823535	161.2033333	112.7966667	G	1060.38	0.24	27.0712	38.6888	254.4912
CantonS	1	4	6035.962818	161.2033333	112.7966667	G	1060.38	0.24	27.0712	38.6888	254.4912
CantonS	1	5	7199.818128	161.2033333	112.7966667	G	1060.38	0.24	27.0712	38.6888	254.4912
CantonS	1	6	4979.663056	161.2033333	112.7966667	G	1060.38	0.24	27.0712	38.6888	254.4912
CantonS	1	7	6168.648197	161.2033333	112.7966667	G	1060.38	0.24	27.0712	38.6888	254.4912
CantonS	1	8	5318.689999	161.2033333	112.7966667	G	1060.38	0.24	27.0712	38.6888	254.4912
CantonS	1	9	8333.833716	161.2033333	112.7966667	G	1060.38	0.24	27.0712	38.6888	254.4912
CantonS	1	10	6973.028536	161.2033333	112.7966667	G	1060.38	0.24	27.0712	38.6888	254.4912
CantonS	2	1	4427.088737	161.2033333	112.7966667	G	1060.38	0.24	27.0712	38.6888	254.4912
CantonS	2	2	6461.290971	161.2033333	112.7966667	G	1060.38	0.24	27.0712	38.6888	254.4912
CantonS	2	3	6015.848758	161.2033333	112.7966667	G	1060.38	0.24	27.0712	38.6888	254.4912
CantonS	2	4	6312.140215	161.2033333	112.7966667	G	1060.38	0.24	27.0712	38.6888	254.4912
CantonS	2	5	5711.249703	161.2033333	112.7966667	G	1060.38	0.24	27.0712	38.6888	254.4912
CantonS	2	6	5628.223673	161.2033333	112.7966667	G	1060.38	0.24	27.0712	38.6888	254.4912
CantonS	2	7	5642.028745	161.2033333	112.7966667	G	1060.38	0.24	27.0712	38.6888	254.4912
CantonS	2	8	6631.257017	161.2033333	112.7966667	G	1060.38	0.24	27.0712	38.6888	254.4912
CantonS	2	9	5215.355355	161.2033333	112.7966667	G	1060.38	0.24	27.0712	38.6888	254.4912
CantonS	2	10	5934.684004	161.2033333	112.7966667	G	1060.38	0.24	27.0712	38.6888	254.4912
CantonS	2	11	5153.333968	161.2033333	112.7966667	G	1060.38	0.24	27.0712	38.6888	254.4912
CantonS	3	1	5799.114635	161.2033333	112.7966667	G	1060.38	0.24	27.0712	38.6888	254.4912
CantonS	3	2	6065.153331	161.2033333	112.7966667	G	1060.38	0.24	27.0712	38.6888	254.4912
CantonS	3	3	6476.392382	161.2033333	112.7966667	G	1060.38	0.24	27.0712	38.6888	254.4912
CantonS	3	4	4416.528673	161.2033333	112.7966667	G	1060.38	0.24	27.0712	38.6888	254.4912
CantonS	3	5	4951.445318	161.2033333	112.7966667	G	1060.38	0.24	27.0712	38.6888	254.4912
CantonS	3	6	7142.851007	161.2033333	112.7966667	G	1060.38	0.24	27.0712	38.6888	254.4912
CantonS	3	7	7014.273128	161.2033333	112.7966667	G	1060.38	0.24	27.0712	38.6888	254.4912
CantonS	3	8	6890.484212	161.2033333	112.7966667	G	1060.38	0.24	27.0712	38.6888	254.4912
CantonS	3	9	6410.206273	161.2033333	112.7966667	G	1060.38	0.24	27.0712	38.6888	254.4912
CantonS	3	10	6051.199481	161.2033333	112.7966667	G	1060.38	0.24	27.0712	38.6888	254.4912
CantonS	3	11	6955.176306	161.2033333	112.7966667	G	1060.38	0.24	27.0712	38.6888	254.4912
CantonS	1	1	5470.659	46.66871044	133	H	696.4065	0.142	18.886	6.626956883	98.889723
CantonS	1	2	5937.921	46.66871044	133	H	696.4065	0.142	18.886	6.626956883	98.889723
CantonS	1	3	5684.689	46.66871044	133	H	696.4065	0.142	18.886	6.626956883	98.889723
CantonS	1	4	4483.505	46.66871044	133	H	696.4065	0.142	18.886	6.626956883	98.889723
CantonS	1	5	5959.957	46.66871044	133	H	696.4065	0.142	18.886	6.626956883	98.889723
CantonS	1	6	4908.131	46.66871044	133	H	696.4065	0.142	18.886	6.626956883	98.889723
CantonS	1	7	3826.669	46.66871044	133	H	696.4065	0.142	18.886	6.626956883	98.889723
CantonS	1	8	5499.729	46.66871044	133	H	696.4065	0.142	18.886	6.626956883	98.889723
CantonS	1	9	5403.405	46.66871044	133	H	696.4065	0.142	18.886	6.626956883	98.889723
CantonS	2	1	4894.271	46.66871044	133	H	696.4065	0.142	18.886	6.626956883	98.889723
CantonS	2	2	5069.252	46.66871044	133	H	696.4065	0.142	18.886	6.626956883	98.889723
CantonS	2	3	5065.544	46.66871044	133	H	696.4065	0.142	18.886	6.626956883	98.889723
CantonS	2	4	5620.382	46.66871044	133	H	696.4065	0.142	18.886	6.626956883	98.889723
CantonS	2	5	5478.682	46.66871044	133	H	696.4065	0.142	18.886	6.626956883	98.889723
CantonS	2	6	6108.887	46.66871044	133	H	696.4065	0.142	18.886	6.626956883	98.889723
CantonS	2	7	5205.68	46.66871044	133	H	696.4065	0.142	18.886	6.626956883	98.889723
CantonS	2	8	5022.453	46.66871044	133	H	696.4065	0.142	18.886	6.626956883	98.889723
CantonS	2	9	4373.374	46.66871044	133	H	696.4065	0.142	18.886	6.626956883	98.889723
CantonS	3	1	3805.128	46.66871044	133	H	696.4065	0.142	18.886	6.626956883	98.889723
CantonS	3	2	4420.094	46.66871044	133	H	696.4065	0.142	18.886	6.626956883	98.889723
CantonS	3	3	4839.677	46.66871044	133	H	696.4065	0.142	18.886	6.626956883	98.889723
CantonS	3	4	3740.927	46.66871044	133	H	696.4065	0.142	18.886	6.626956883	98.889723
CantonS	3	5	5624.871	46.66871044	133	H	696.4065	0.142	18.886	6.626956883	98.889723
CantonS	3	6	4367.954	46.66871044	133	H	696.4065	0.142	18.886	6.626956883	98.889723
CantonS	3	7	4025.256	46.66871044	133	H	696.4065	0.142	18.886	6.626956883	98.889723
CantonS	3	8	5090.96	46.66871044	133	H	696.4065	0.142	18.886	6.626956883	98.889723
CantonS	1	1	4828.403	25	155	I	696.4065	0.224	34.72	5.6	155.995056
CantonS	1	2	5108.051	25	155	I	696.4065	0.224	34.72	5.6	155.995056
CantonS	1	3	3835.031	25	155	I	696.4065	0.224	34.72	5.6	155.995056
CantonS	1	4	5493.904	25	155	I	696.4065	0.224	34.72	5.6	155.995056
CantonS	1	5	4502.331	25	155	I	696.4065	0.224	34.72	5.6	155.995056
CantonS	1	6	3914.536	25	155	I	696.4065	0.224	34.72	5.6	155.995056
CantonS	1	7	4525.129	25	155	I	696.4065	0.224	34.72	5.6	155.995056
CantonS	1	8	4876.547	25	155	I	696.4065	0.224	34.72	5.6	155.995056
CantonS	1	9	4599.299	25	155	I	696.4065	0.224	34.72	5.6	155.995056
CantonS	1	10	4434.615	25	155	I	696.4065	0.224	34.72	5.6	155.995056
CantonS	1	11	4180.064	25	155	I	696.4065	0.224	34.72	5.6	155.995056
CantonS	2	1	4859.201	25	155	I	696.4065	0.224	34.72	5.6	155.995056
CantonS	2	2	3826.759	25	155	I	696.4065	0.224	34.72	5.6	155.995056
CantonS	2	3	3838.156	25	155	I	696.4065	0.224	34.72	5.6	155.995056
CantonS	2	4	4346.242	25	155	I	696.4065	0.224	34.72	5.6	155.995056
CantonS	2	5	4986.804	25	155	I	696.4065	0.224	34.72	5.6	155.995056
CantonS	2	6	4988.229	25	155	I	696.4065	0.224	34.72	5.6	155.995056
CantonS	2	7	4952.947	25	155	I	696.4065	0.224	34.72	5.6	155.995056
CantonS	2	8	4714.929	25	155	I	696.4065	0.224	34.72	5.6	155.995056
CantonS	3	1	5604.99	25	155	I	696.4065	0.224	34.72	5.6	155.995056
CantonS	3	2	3768.308	25	155	I	696.4065	0.224	34.72	5.6	155.995056
CantonS	3	3	4094.166	25	155	I	696.4065	0.224	34.72	5.6	155.995056
CantonS	3	4	4646.835	25	155	I	696.4065	0.224	34.72	5.6	155.995056
CantonS	3	5	5491.408	25	155	I	696.4065	0.224	34.72	5.6	155.995056
CantonS	3	6	3841.793	25	155	I	696.4065	0.224	34.72	5.6	155.995056
CantonS	1	1	3772.185839	1.185	16.81	J	69	1.459	24.52579	1.728915	100.671
CantonS	1	2	4039.569773	1.185	16.81	J	69	1.459	24.52579	1.728915	100.671
CantonS	1	3	4884.757735	1.185	16.81	J	69	1.459	24.52579	1.728915	100.671
CantonS	1	4	4317.124661	1.185	16.81	J	69	1.459	24.52579	1.728915	100.671
CantonS	1	5	5370.839027	1.185	16.81	J	69	1.459	24.52579	1.728915	100.671
CantonS	1	6	4956.241563	1.185	16.81	J	69	1.459	24.52579	1.728915	100.671
CantonS	1	7	4932.775333	1.185	16.81	J	69	1.459	24.52579	1.728915	100.671
CantonS	1	8	3693.789591	1.185	16.81	J	69	1.459	24.52579	1.728915	100.671
CantonS	1	9	4562.645621	1.185	16.81	J	69	1.459	24.52579	1.728915	100.671
CantonS	2	1	4197.140489	1.185	16.81	J	69	1.459	24.52579	1.728915	100.671
CantonS	2	2	4253.529148	1.185	16.81	J	69	1.459	24.52579	1.728915	100.671
CantonS	2	3	5137.417923	1.185	16.81	J	69	1.459	24.52579	1.728915	100.671
CantonS	2	4	4121.296343	1.185	16.81	J	69	1.459	24.52579	1.728915	100.671
CantonS	2	5	4472.552152	1.185	16.81	J	69	1.459	24.52579	1.728915	100.671
CantonS	2	6	3928.447731	1.185	16.81	J	69	1.459	24.52579	1.728915	100.671
CantonS	2	7	3334.486285	1.185	16.81	J	69	1.459	24.52579	1.728915	100.671
CantonS	2	8	4174.583568	1.185	16.81	J	69	1.459	24.52579	1.728915	100.671
CantonS	2	9	4666.397467	1.185	16.81	J	69	1.459	24.52579	1.728915	100.671
CantonS	2	10	3972.164314	1.185	16.81	J	69	1.459	24.52579	1.728915	100.671
CantonS	3	1	4713.212362	1.185	16.81	J	69	1.459	24.52579	1.728915	100.671
CantonS	3	2	4177.379124	1.185	16.81	J	69	1.459	24.52579	1.728915	100.671
CantonS	3	3	4152.229526	1.185	16.81	J	69	1.459	24.52579	1.728915	100.671
CantonS	3	4	4268.240409	1.185	16.81	J	69	1.459	24.52579	1.728915	100.671
CantonS	3	5	4929.594829	1.185	16.81	J	69	1.459	24.52579	1.728915	100.671
CantonS	3	6	5186.579961	1.185	16.81	J	69	1.459	24.52579	1.728915	100.671
CantonS	3	7	4441.579433	1.185	16.81	J	69	1.459	24.52579	1.728915	100.671
CantonS	3	8	4632.321233	1.185	16.81	J	69	1.459	24.52579	1.728915	100.671
CantonS	3	9	5039.279037	1.185	16.81	J	69	1.459	24.52579	1.728915	100.671
CantonS	3	10	4444.965936	1.185	16.81	J	69	1.459	24.52579	1.728915	100.671
CantonS	1	1	6077.643337	105.9	168.1	K	1060.38	0.179	30.0899	18.9561	189.80802
CantonS	1	2	7335.592457	105.9	168.1	K	1060.38	0.179	30.0899	18.9561	189.80802
CantonS	1	3	7422.588654	105.9	168.1	K	1060.38	0.179	30.0899	18.9561	189.80802
CantonS	1	4	6428.718117	105.9	168.1	K	1060.38	0.179	30.0899	18.9561	189.80802
CantonS	1	5		105.9	168.1	K	1060.38	0.179	30.0899	18.9561	189.80802
CantonS	1	6	5240.371781	105.9	168.1	K	1060.38	0.179	30.0899	18.9561	189.80802
CantonS	1	7	6428.718117	105.9	168.1	K	1060.38	0.179	30.0899	18.9561	189.80802
CantonS	1	8	6853.801776	105.9	168.1	K	1060.38	0.179	30.0899	18.9561	189.80802
CantonS	1	9	5661.393717	105.9	168.1	K	1060.38	0.179	30.0899	18.9561	189.80802
CantonS	2	1	6318.145406	105.9	168.1	K	1060.38	0.179	30.0899	18.9561	189.80802
CantonS	2	2	4542.410874	105.9	168.1	K	1060.38	0.179	30.0899	18.9561	189.80802
CantonS	2	3	4755.43493	105.9	168.1	K	1060.38	0.179	30.0899	18.9561	189.80802
CantonS	2	4	5407.337312	105.9	168.1	K	1060.38	0.179	30.0899	18.9561	189.80802
CantonS	2	5	5255.20789	105.9	168.1	K	1060.38	0.179	30.0899	18.9561	189.80802
CantonS	2	6	4930.375129	105.9	168.1	K	1060.38	0.179	30.0899	18.9561	189.80802
CantonS	2	7	5754.7426	105.9	168.1	K	1060.38	0.179	30.0899	18.9561	189.80802
CantonS	2	8	6223.321236	105.9	168.1	K	1060.38	0.179	30.0899	18.9561	189.80802
CantonS	2	9	4626.978778	105.9	168.1	K	1060.38	0.179	30.0899	18.9561	189.80802
CantonS	2	10	5873.219231	105.9	168.1	K	1060.38	0.179	30.0899	18.9561	189.80802
CantonS	3	1	5671.138107	105.9	168.1	K	1060.38	0.179	30.0899	18.9561	189.80802
CantonS	3	2	5455.694081	105.9	168.1	K	1060.38	0.179	30.0899	18.9561	189.80802
CantonS	3	3	7252.852537	105.9	168.1	K	1060.38	0.179	30.0899	18.9561	189.80802
CantonS	3	4	5739.234392	105.9	168.1	K	1060.38	0.179	30.0899	18.9561	189.80802
CantonS	3	5	5041.241233	105.9	168.1	K	1060.38	0.179	30.0899	18.9561	189.80802
CantonS	3	6	6715.576264	105.9	168.1	K	1060.38	0.179	30.0899	18.9561	189.80802
CantonS	3	7		105.9	168.1	K	1060.38	0.179	30.0899	18.9561	189.80802
CantonS	3	8	5541.78409	105.9	168.1	K	1060.38	0.179	30.0899	18.9561	189.80802
CantonS	1	1	3944.55521	11.85	168.1	L	696.4065	0.44	73.964	5.214	306.41886
CantonS	1	2	4606.354921	11.85	168.1	L	696.4065	0.44	73.964	5.214	306.41886
CantonS	1	3	5571.407409	11.85	168.1	L	696.4065	0.44	73.964	5.214	306.41886
CantonS	1	4	4828.307692	11.85	168.1	L	696.4065	0.44	73.964	5.214	306.41886
CantonS	1	5	5357.594731	11.85	168.1	L	696.4065	0.44	73.964	5.214	306.41886
CantonS	1	6	4475.924089	11.85	168.1	L	696.4065	0.44	73.964	5.214	306.41886
CantonS	1	7	5066.658213	11.85	168.1	L	696.4065	0.44	73.964	5.214	306.41886
CantonS	1	8	4133.297361	11.85	168.1	L	696.4065	0.44	73.964	5.214	306.41886
CantonS	1	9	4670.159554	11.85	168.1	L	696.4065	0.44	73.964	5.214	306.41886
CantonS	2	1	5048.955801	11.85	168.1	L	696.4065	0.44	73.964	5.214	306.41886
CantonS	2	2	4586.765223	11.85	168.1	L	696.4065	0.44	73.964	5.214	306.41886
CantonS	2	3	3755.97328	11.85	168.1	L	696.4065	0.44	73.964	5.214	306.41886
CantonS	2	4	4593.496613	11.85	168.1	L	696.4065	0.44	73.964	5.214	306.41886
CantonS	2	5	4838.738746	11.85	168.1	L	696.4065	0.44	73.964	5.214	306.41886
CantonS	2	6	4416.096907	11.85	168.1	L	696.4065	0.44	73.964	5.214	306.41886
CantonS	2	7	5016.835521	11.85	168.1	L	696.4065	0.44	73.964	5.214	306.41886
CantonS	2	8	4144.407796	11.85	168.1	L	696.4065	0.44	73.964	5.214	306.41886
CantonS	2	9	3660.152407	11.85	168.1	L	696.4065	0.44	73.964	5.214	306.41886
CantonS	2	10	5532.27275	11.85	168.1	L	696.4065	0.44	73.964	5.214	306.41886
CantonS	3	1	5134.114652	11.85	168.1	L	696.4065	0.44	73.964	5.214	306.41886
CantonS	3	2	4666.19771	11.85	168.1	L	696.4065	0.44	73.964	5.214	306.41886
CantonS	3	3	3831.776851	11.85	168.1	L	696.4065	0.44	73.964	5.214	306.41886
CantonS	3	4	4339.961449	11.85	168.1	L	696.4065	0.44	73.964	5.214	306.41886
CantonS	3	5	3704.262261	11.85	168.1	L	696.4065	0.44	73.964	5.214	306.41886
CantonS	3	6	4454.07256	11.85	168.1	L	696.4065	0.44	73.964	5.214	306.41886
CantonS	3	7	4085.757307	11.85	168.1	L	696.4065	0.44	73.964	5.214	306.41886
CantonS	3	8	4093.32726	11.85	168.1	L	696.4065	0.44	73.964	5.214	306.41886
CantonS	3	9	3505.998366	11.85	168.1	L	696.4065	0.44	73.964	5.214	306.41886
CantonS	1	1	4933.831	11.85	168.1	L	696.4065	0.44	73.964	5.214	306.41886
CantonS	1	2	5315.289	11.85	168.1	L	696.4065	0.44	73.964	5.214	306.41886
CantonS	1	3	5202.292	11.85	168.1	L	696.4065	0.44	73.964	5.214	306.41886
CantonS	1	4	5515.131	11.85	168.1	L	696.4065	0.44	73.964	5.214	306.41886
CantonS	1	5	4537.357	11.85	168.1	L	696.4065	0.44	73.964	5.214	306.41886
CantonS	1	6	5348.643	11.85	168.1	L	696.4065	0.44	73.964	5.214	306.41886
CantonS	1	7	4763.004	11.85	168.1	L	696.4065	0.44	73.964	5.214	306.41886
CantonS	1	8	5107.994	11.85	168.1	L	696.4065	0.44	73.964	5.214	306.41886
CantonS	1	9	5035.849	11.85	168.1	L	696.4065	0.44	73.964	5.214	306.41886
CantonS	1	1	4985.685	11.85	168.1	L	696.4065	0.44	73.964	5.214	306.41886
CantonS	1	2	3841.359	11.85	168.1	L	696.4065	0.44	73.964	5.214	306.41886
CantonS	1	3	5723.491	11.85	168.1	L	696.4065	0.44	73.964	5.214	306.41886
CantonS	1	4	4538.927	11.85	168.1	L	696.4065	0.44	73.964	5.214	306.41886
CantonS	1	5	5663.111	11.85	168.1	L	696.4065	0.44	73.964	5.214	306.41886
CantonS	1	6	5204.575	11.85	168.1	L	696.4065	0.44	73.964	5.214	306.41886
CantonS	1	7	4684.456	11.85	168.1	L	696.4065	0.44	73.964	5.214	306.41886
CantonS	1	8	4341.901	11.85	168.1	L	696.4065	0.44	73.964	5.214	306.41886
CantonS	2	1	5446.578	11.85	168.1	L	696.4065	0.44	73.964	5.214	306.41886
CantonS	2	2	4946.125	11.85	168.1	L	696.4065	0.44	73.964	5.214	306.41886
CantonS	2	3	4750.523	11.85	168.1	L	696.4065	0.44	73.964	5.214	306.41886
CantonS	2	4	4952.274	11.85	168.1	L	696.4065	0.44	73.964	5.214	306.41886
CantonS	2	5	5021.682	11.85	168.1	L	696.4065	0.44	73.964	5.214	306.41886
CantonS	2	6	4306.397	11.85	168.1	L	696.4065	0.44	73.964	5.214	306.41886
CantonS	2	7	4461.174	11.85	168.1	L	696.4065	0.44	73.964	5.214	306.41886
CantonS	2	1	5859.056	11.85	168.1	L	696.4065	0.44	73.964	5.214	306.41886
CantonS	2	2	5102.07	11.85	168.1	L	696.4065	0.44	73.964	5.214	306.41886
CantonS	2	3	5980.964	11.85	168.1	L	696.4065	0.44	73.964	5.214	306.41886
CantonS	2	4	4315.709	11.85	168.1	L	696.4065	0.44	73.964	5.214	306.41886
CantonS	2	5	5408.182	11.85	168.1	L	696.4065	0.44	73.964	5.214	306.41886
CantonS	2	6	3565.33	11.85	168.1	L	696.4065	0.44	73.964	5.214	306.41886
CantonS	2	7	5786.047	11.85	168.1	L	696.4065	0.44	73.964	5.214	306.41886
CantonS	2	8	4214.09	11.85	168.1	L	696.4065	0.44	73.964	5.214	306.41886
CantonS	3	1	4456.975	11.85	168.1	L	696.4065	0.44	73.964	5.214	306.41886
CantonS	3	2	5253.26	11.85	168.1	L	696.4065	0.44	73.964	5.214	306.41886
CantonS	3	4	5431.239	11.85	168.1	L	696.4065	0.44	73.964	5.214	306.41886
CantonS	3	5	4922.426	11.85	168.1	L	696.4065	0.44	73.964	5.214	306.41886
CantonS	3	6	4236.881	11.85	168.1	L	696.4065	0.44	73.964	5.214	306.41886
CantonS	3	7	4692.387	11.85	168.1	L	696.4065	0.44	73.964	5.214	306.41886
CantonS	3	8	4487.209	11.85	168.1	L	696.4065	0.44	73.964	5.214	306.41886
CantonS	3	9	4742.672	11.85	168.1	L	696.4065	0.44	73.964	5.214	306.41886
CantonS	3	1	4059.861	11.85	168.1	L	696.4065	0.44	73.964	5.214	306.41886
CantonS	3	2	3751.527	11.85	168.1	L	696.4065	0.44	73.964	5.214	306.41886
CantonS	3	3	4630.501	11.85	168.1	L	696.4065	0.44	73.964	5.214	306.41886
CantonS	3	4	4637.797	11.85	168.1	L	696.4065	0.44	73.964	5.214	306.41886
CantonS	3	5	4374.318	11.85	168.1	L	696.4065	0.44	73.964	5.214	306.41886
CantonS	3	6	4824.424	11.85	168.1	L	696.4065	0.44	73.964	5.214	306.41886
CantonS	3	7	4159.537	11.85	168.1	L	696.4065	0.44	73.964	5.214	306.41886
CantonS	1	1	4163.939	11.85	168.1	L	696.4065	0.44	73.964	5.214	306.41886
CantonS	1	2	4553.188	11.85	168.1	L	696.4065	0.44	73.964	5.214	306.41886
CantonS	1	3	4869.778	11.85	168.1	L	696.4065	0.44	73.964	5.214	306.41886
CantonS	1	4	4808.671	11.85	168.1	L	696.4065	0.44	73.964	5.214	306.41886
CantonS	1	5	4730.033	11.85	168.1	L	696.4065	0.44	73.964	5.214	306.41886
CantonS	1	6	4032.063	11.85	168.1	L	696.4065	0.44	73.964	5.214	306.41886
CantonS	2	1	4520.443	11.85	168.1	L	696.4065	0.44	73.964	5.214	306.41886
CantonS	2	2	2774.354	11.85	168.1	L	696.4065	0.44	73.964	5.214	306.41886
CantonS	2	3	4128.047	11.85	168.1	L	696.4065	0.44	73.964	5.214	306.41886
CantonS	2	4	3859.357	11.85	168.1	L	696.4065	0.44	73.964	5.214	306.41886
CantonS	2	5	4120.552	11.85	168.1	L	696.4065	0.44	73.964	5.214	306.41886
CantonS	2	6	4238.437	11.85	168.1	L	696.4065	0.44	73.964	5.214	306.41886
CantonS	2	7	5053.004	11.85	168.1	L	696.4065	0.44	73.964	5.214	306.41886
CantonS	2	8	3727.903	11.85	168.1	L	696.4065	0.44	73.964	5.214	306.41886
CantonS	2	9	4083.507	11.85	168.1	L	696.4065	0.44	73.964	5.214	306.41886
CantonS	3	1	4725.767	11.85	168.1	L	696.4065	0.44	73.964	5.214	306.41886
CantonS	3	2	4314.223	11.85	168.1	L	696.4065	0.44	73.964	5.214	306.41886
CantonS	3	3	3979.255	11.85	168.1	L	696.4065	0.44	73.964	5.214	306.41886
CantonS	3	4	5521.26	11.85	168.1	L	696.4065	0.44	73.964	5.214	306.41886
CantonS	3	5	4271.935	11.85	168.1	L	696.4065	0.44	73.964	5.214	306.41886
CantonS	3	6	4524.452	11.85	168.1	L	696.4065	0.44	73.964	5.214	306.41886
CantonS	1	1	4171.106	161.2033333	168.1	M	1274	0.14	23.534	22.56846667	178.36
CantonS	1	2	6156.784	161.2033333	168.1	M	1274	0.14	23.534	22.56846667	178.36
CantonS	1	3	6004.111	161.2033333	168.1	M	1274	0.14	23.534	22.56846667	178.36
CantonS	1	4	5554.739	161.2033333	168.1	M	1274	0.14	23.534	22.56846667	178.36
CantonS	1	5	6478.352	161.2033333	168.1	M	1274	0.14	23.534	22.56846667	178.36
CantonS	1	6	4748.936	161.2033333	168.1	M	1274	0.14	23.534	22.56846667	178.36
CantonS	1	7	5790.461	161.2033333	168.1	M	1274	0.14	23.534	22.56846667	178.36
CantonS	1	8	5424.939	161.2033333	168.1	M	1274	0.14	23.534	22.56846667	178.36
CantonS	1	9	5809.968	161.2033333	168.1	M	1274	0.14	23.534	22.56846667	178.36
CantonS	2	1	4403.453	161.2033333	168.1	M	1274	0.14	23.534	22.56846667	178.36
CantonS	2	2	5308.423	161.2033333	168.1	M	1274	0.14	23.534	22.56846667	178.36
CantonS	2	3	4977.644	161.2033333	168.1	M	1274	0.14	23.534	22.56846667	178.36
CantonS	2	4	5471.06	161.2033333	168.1	M	1274	0.14	23.534	22.56846667	178.36
CantonS	2	5	4059.528	161.2033333	168.1	M	1274	0.14	23.534	22.56846667	178.36
CantonS	2	6	6202.59	161.2033333	168.1	M	1274	0.14	23.534	22.56846667	178.36
CantonS	2	7	5312.677	161.2033333	168.1	M	1274	0.14	23.534	22.56846667	178.36
CantonS	2	8	5223.465	161.2033333	168.1	M	1274	0.14	23.534	22.56846667	178.36
CantonS	2	9	4811.035	161.2033333	168.1	M	1274	0.14	23.534	22.56846667	178.36
CantonS	3	1	4813.403	161.2033333	168.1	M	1274	0.14	23.534	22.56846667	178.36
CantonS	3	2	5205.279	161.2033333	168.1	M	1274	0.14	23.534	22.56846667	178.36
CantonS	3	3	5497.167	161.2033333	168.1	M	1274	0.14	23.534	22.56846667	178.36
CantonS	3	4	5818.759	161.2033333	168.1	M	1274	0.14	23.534	22.56846667	178.36
CantonS	3	5	6421.726	161.2033333	168.1	M	1274	0.14	23.534	22.56846667	178.36
CantonS	3	6	5273.765	161.2033333	168.1	M	1274	0.14	23.534	22.56846667	178.36
CantonS	1	1	3979.033	46.66871044	168.1	N	831	0.076	12.7756	3.546821993	63.156
CantonS	1	2	4807.542	46.66871044	168.1	N	831	0.076	12.7756	3.546821993	63.156
CantonS	1	3	5340.066	46.66871044	168.1	N	831	0.076	12.7756	3.546821993	63.156
CantonS	1	4	3931.416	46.66871044	168.1	N	831	0.076	12.7756	3.546821993	63.156
CantonS	1	5	4673.68	46.66871044	168.1	N	831	0.076	12.7756	3.546821993	63.156
CantonS	1	6	4521.972	46.66871044	168.1	N	831	0.076	12.7756	3.546821993	63.156
CantonS	1	7	4024.378	46.66871044	168.1	N	831	0.076	12.7756	3.546821993	63.156
CantonS	1	8	5305.738	46.66871044	168.1	N	831	0.076	12.7756	3.546821993	63.156
CantonS	2	1	4978.075	46.66871044	168.1	N	831	0.076	12.7756	3.546821993	63.156
CantonS	2	2	4261.078	46.66871044	168.1	N	831	0.076	12.7756	3.546821993	63.156
CantonS	2	3	5083.35	46.66871044	168.1	N	831	0.076	12.7756	3.546821993	63.156
CantonS	2	4	4786.005	46.66871044	168.1	N	831	0.076	12.7756	3.546821993	63.156
CantonS	2	5	5516.298	46.66871044	168.1	N	831	0.076	12.7756	3.546821993	63.156
CantonS	2	6	4304.806	46.66871044	168.1	N	831	0.076	12.7756	3.546821993	63.156
CantonS	2	7	5569.076	46.66871044	168.1	N	831	0.076	12.7756	3.546821993	63.156
CantonS	2	8	4595.458	46.66871044	168.1	N	831	0.076	12.7756	3.546821993	63.156
CantonS	3	1	5262.216	46.66871044	168.1	N	831	0.076	12.7756	3.546821993	63.156
CantonS	3	2	4581.323	46.66871044	168.1	N	831	0.076	12.7756	3.546821993	63.156
CantonS	3	3	4447.116	46.66871044	168.1	N	831	0.076	12.7756	3.546821993	63.156
CantonS	3	4		46.66871044	168.1	N	831	0.076	12.7756	3.546821993	63.156
CantonS	3	5	3792.652	46.66871044	168.1	N	831	0.076	12.7756	3.546821993	63.156
CantonS	3	6	5513.375	46.66871044	168.1	N	831	0.076	12.7756	3.546821993	63.156
CantonS	3	7	3963.375	46.66871044	168.1	N	831	0.076	12.7756	3.546821993	63.156
CantonS	3	8	5326.36	46.66871044	168.1	N	831	0.076	12.7756	3.546821993	63.156
CantonS	1	1	4027.786	0	17.99833333	O	69	1.452	26.13358	0	100.188
CantonS	1	2	4863.507	0	17.99833333	O	69	1.452	26.13358	0	100.188
CantonS	1	3	4133.532	0	17.99833333	O	69	1.452	26.13358	0	100.188
CantonS	1	4	4051.597	0	17.99833333	O	69	1.452	26.13358	0	100.188
CantonS	1	5	3207.662	0	17.99833333	O	69	1.452	26.13358	0	100.188
CantonS	1	6	3666.313	0	17.99833333	O	69	1.452	26.13358	0	100.188
CantonS	1	7	3644.473	0	17.99833333	O	69	1.452	26.13358	0	100.188
CantonS	1	8	4186.732	0	17.99833333	O	69	1.452	26.13358	0	100.188
CantonS	1	9	4104.194	0	17.99833333	O	69	1.452	26.13358	0	100.188
CantonS	2	1	2680.428	0	17.99833333	O	69	1.452	26.13358	0	100.188
CantonS	2	2	4296.479	0	17.99833333	O	69	1.452	26.13358	0	100.188
CantonS	2	3	3679.286	0	17.99833333	O	69	1.452	26.13358	0	100.188
CantonS	2	4	3832.307	0	17.99833333	O	69	1.452	26.13358	0	100.188
CantonS	2	5	4445.692	0	17.99833333	O	69	1.452	26.13358	0	100.188
CantonS	2	6	4381.078	0	17.99833333	O	69	1.452	26.13358	0	100.188
CantonS	2	7	4213.8	0	17.99833333	O	69	1.452	26.13358	0	100.188
CantonS	2	8	3443.461	0	17.99833333	O	69	1.452	26.13358	0	100.188
CantonS	2	9	4161.109	0	17.99833333	O	69	1.452	26.13358	0	100.188
CantonS	3	1	3367.934	0	17.99833333	O	69	1.452	26.13358	0	100.188
CantonS	3	2	3623.936	0	17.99833333	O	69	1.452	26.13358	0	100.188
CantonS	3	3	4275.105	0	17.99833333	O	69	1.452	26.13358	0	100.188
CantonS	3	4	4290.181	0	17.99833333	O	69	1.452	26.13358	0	100.188
CantonS	3	5	4075.152	0	17.99833333	O	69	1.452	26.13358	0	100.188
CantonS	3	6	4861.462	0	17.99833333	O	69	1.452	26.13358	0	100.188
CantonS	3	7	4298.758	0	17.99833333	O	69	1.452	26.13358	0	100.188
CantonS	1	1	4432.665	0	179.9833333	P	696.4065	0.785	141.2869167	0	546.6791025
CantonS	1	2	4793.124	0	179.9833333	P	696.4065	0.785	141.2869167	0	546.6791025
CantonS	1	3	4254.547	0	179.9833333	P	696.4065	0.785	141.2869167	0	546.6791025
CantonS	1	4	4801.928	0	179.9833333	P	696.4065	0.785	141.2869167	0	546.6791025
CantonS	1	5	3747.664	0	179.9833333	P	696.4065	0.785	141.2869167	0	546.6791025
CantonS	1	6	3232.776	0	179.9833333	P	696.4065	0.785	141.2869167	0	546.6791025
CantonS	1	7	5093.502	0	179.9833333	P	696.4065	0.785	141.2869167	0	546.6791025
CantonS	1	8	4150.046	0	179.9833333	P	696.4065	0.785	141.2869167	0	546.6791025
CantonS	1	9	4900.23	0	179.9833333	P	696.4065	0.785	141.2869167	0	546.6791025
CantonS	2	1	4715.787	0	179.9833333	P	696.4065	0.785	141.2869167	0	546.6791025
CantonS	2	2	4194.285	0	179.9833333	P	696.4065	0.785	141.2869167	0	546.6791025
CantonS	2	3	4033.748	0	179.9833333	P	696.4065	0.785	141.2869167	0	546.6791025
CantonS	2	4	4433.038	0	179.9833333	P	696.4065	0.785	141.2869167	0	546.6791025
CantonS	2	5	4543.493	0	179.9833333	P	696.4065	0.785	141.2869167	0	546.6791025
CantonS	2	6	4357.049	0	179.9833333	P	696.4065	0.785	141.2869167	0	546.6791025
CantonS	2	7	4466.132	0	179.9833333	P	696.4065	0.785	141.2869167	0	546.6791025
CantonS	2	8	4968.733	0	179.9833333	P	696.4065	0.785	141.2869167	0	546.6791025
CantonS	2	9	4822.74	0	179.9833333	P	696.4065	0.785	141.2869167	0	546.6791025
CantonS	3	1	4110.31	0	179.9833333	P	696.4065	0.785	141.2869167	0	546.6791025
CantonS	3	2	2917.077	0	179.9833333	P	696.4065	0.785	141.2869167	0	546.6791025
CantonS	3	4	3611.273	0	179.9833333	P	696.4065	0.785	141.2869167	0	546.6791025
CantonS	3	5	3741.366	0	179.9833333	P	696.4065	0.785	141.2869167	0	546.6791025
CantonS	3	6	3819.51	0	179.9833333	P	696.4065	0.785	141.2869167	0	546.6791025
CantonS	3	7	3779.51	0	179.9833333	P	696.4065	0.785	141.2869167	0	546.6791025
CantonS	1	1	4894.955	105.9	220	Q	1261	0.168	36.96	17.7912	211.848
CantonS	1	2	5745.811	105.9	220	Q	1261	0.168	36.96	17.7912	211.848
CantonS	1	3	4285.99	105.9	220	Q	1261	0.168	36.96	17.7912	211.848
CantonS	1	4	4448.207	105.9	220	Q	1261	0.168	36.96	17.7912	211.848
CantonS	1	5	5493.514	105.9	220	Q	1261	0.168	36.96	17.7912	211.848
CantonS	1	6	5043.055	105.9	220	Q	1261	0.168	36.96	17.7912	211.848
CantonS	1	7	5140.633	105.9	220	Q	1261	0.168	36.96	17.7912	211.848
CantonS	1	8	5483.434	105.9	220	Q	1261	0.168	36.96	17.7912	211.848
CantonS	2	1	5830.067	105.9	220	Q	1261	0.168	36.96	17.7912	211.848
CantonS	2	2	5431.539	105.9	220	Q	1261	0.168	36.96	17.7912	211.848
CantonS	2	3	5620.776	105.9	220	Q	1261	0.168	36.96	17.7912	211.848
CantonS	2	4	5330.063	105.9	220	Q	1261	0.168	36.96	17.7912	211.848
CantonS	2	5	5458.383	105.9	220	Q	1261	0.168	36.96	17.7912	211.848
CantonS	2	6	5463.065	105.9	220	Q	1261	0.168	36.96	17.7912	211.848
CantonS	2	7	4720.47	105.9	220	Q	1261	0.168	36.96	17.7912	211.848
CantonS	2	8	5424.801	105.9	220	Q	1261	0.168	36.96	17.7912	211.848
CantonS	2	9	5607.182	105.9	220	Q	1261	0.168	36.96	17.7912	211.848
CantonS	3	1	4609.563	105.9	220	Q	1261	0.168	36.96	17.7912	211.848
CantonS	3	2	5808.947	105.9	220	Q	1261	0.168	36.96	17.7912	211.848
CantonS	3	3	5163.227	105.9	220	Q	1261	0.168	36.96	17.7912	211.848
CantonS	3	4	4467.879	105.9	220	Q	1261	0.168	36.96	17.7912	211.848
CantonS	3	5		105.9	220	Q	1261	0.168	36.96	17.7912	211.848
CantonS	3	6	4999.777	105.9	220	Q	1261	0.168	36.96	17.7912	211.848
CantonS	1	1	4836.977	46.66871044	220	R	1032	0.086	18.92	4.013509098	88.752
CantonS	1	2	3505.304	46.66871044	220	R	1032	0.086	18.92	4.013509098	88.752
CantonS	1	3	5332.432	46.66871044	220	R	1032	0.086	18.92	4.013509098	88.752
CantonS	1	4	5801.387	46.66871044	220	R	1032	0.086	18.92	4.013509098	88.752
CantonS	1	5	5917.654	46.66871044	220	R	1032	0.086	18.92	4.013509098	88.752
CantonS	1	6	5014.807	46.66871044	220	R	1032	0.086	18.92	4.013509098	88.752
CantonS	1	7	6146.384	46.66871044	220	R	1032	0.086	18.92	4.013509098	88.752
CantonS	1	8	5253.597	46.66871044	220	R	1032	0.086	18.92	4.013509098	88.752
CantonS	1	9	5454.276	46.66871044	220	R	1032	0.086	18.92	4.013509098	88.752
CantonS	1	10	5012.707	46.66871044	220	R	1032	0.086	18.92	4.013509098	88.752
CantonS	2	1	4849.821	46.66871044	220	R	1032	0.086	18.92	4.013509098	88.752
CantonS	2	2	5892.839	46.66871044	220	R	1032	0.086	18.92	4.013509098	88.752
CantonS	2	3	4220.719	46.66871044	220	R	1032	0.086	18.92	4.013509098	88.752
CantonS	2	4	5214.992	46.66871044	220	R	1032	0.086	18.92	4.013509098	88.752
CantonS	2	5	5370.845	46.66871044	220	R	1032	0.086	18.92	4.013509098	88.752
CantonS	2	6	5509.345	46.66871044	220	R	1032	0.086	18.92	4.013509098	88.752
CantonS	2	7	4802.488	46.66871044	220	R	1032	0.086	18.92	4.013509098	88.752
CantonS	2	8	4472.409	46.66871044	220	R	1032	0.086	18.92	4.013509098	88.752
CantonS	3	1	4776.824	46.66871044	220	R	1032	0.086	18.92	4.013509098	88.752
CantonS	3	2	3230.274	46.66871044	220	R	1032	0.086	18.92	4.013509098	88.752
CantonS	3	3	4171.842	46.66871044	220	R	1032	0.086	18.92	4.013509098	88.752
CantonS	3	4	4798.282	46.66871044	220	R	1032	0.086	18.92	4.013509098	88.752
CantonS	3	5	4302.736	46.66871044	220	R	1032	0.086	18.92	4.013509098	88.752
CantonS	3	6	4992.887	46.66871044	220	R	1032	0.086	18.92	4.013509098	88.752
CantonS	3	7	4888.887	46.66871044	220	R	1032	0.086	18.92	4.013509098	88.752
CantonS	3	8	3858.412	46.66871044	220	R	1032	0.086	18.92	4.013509098	88.752
CantonS	1	1	4050.703	161.2033333	255.9566546	S	1614	0.127	32.50649514	20.47282333	204.978
CantonS	1	2		161.2033333	255.9566546	S	1614	0.127	32.50649514	20.47282333	204.978
CantonS	1	3	5253.546	161.2033333	255.9566546	S	1614	0.127	32.50649514	20.47282333	204.978
CantonS	1	4	5576.834	161.2033333	255.9566546	S	1614	0.127	32.50649514	20.47282333	204.978
CantonS	1	5	5316.468	161.2033333	255.9566546	S	1614	0.127	32.50649514	20.47282333	204.978
CantonS	1	6	3890.105	161.2033333	255.9566546	S	1614	0.127	32.50649514	20.47282333	204.978
CantonS	1	7	6300.078	161.2033333	255.9566546	S	1614	0.127	32.50649514	20.47282333	204.978
CantonS	1	8	5302.849	161.2033333	255.9566546	S	1614	0.127	32.50649514	20.47282333	204.978
CantonS	1	9	6209.87	161.2033333	255.9566546	S	1614	0.127	32.50649514	20.47282333	204.978
CantonS	1	10	5707.257	161.2033333	255.9566546	S	1614	0.127	32.50649514	20.47282333	204.978
CantonS	2	1	5364.333	161.2033333	255.9566546	S	1614	0.127	32.50649514	20.47282333	204.978
CantonS	2	2	4633.942	161.2033333	255.9566546	S	1614	0.127	32.50649514	20.47282333	204.978
CantonS	2	3	5344.735	161.2033333	255.9566546	S	1614	0.127	32.50649514	20.47282333	204.978
CantonS	2	4	5529.165	161.2033333	255.9566546	S	1614	0.127	32.50649514	20.47282333	204.978
CantonS	2	5	5220.71	161.2033333	255.9566546	S	1614	0.127	32.50649514	20.47282333	204.978
CantonS	2	6	4881.661	161.2033333	255.9566546	S	1614	0.127	32.50649514	20.47282333	204.978
CantonS	2	7	4630.675	161.2033333	255.9566546	S	1614	0.127	32.50649514	20.47282333	204.978
CantonS	2	8	4368.098	161.2033333	255.9566546	S	1614	0.127	32.50649514	20.47282333	204.978
CantonS	3	1	6129.911	161.2033333	255.9566546	S	1614	0.127	32.50649514	20.47282333	204.978
CantonS	3	2	4240.57	161.2033333	255.9566546	S	1614	0.127	32.50649514	20.47282333	204.978
CantonS	3	3	5441.312	161.2033333	255.9566546	S	1614	0.127	32.50649514	20.47282333	204.978
CantonS	3	4	4435.087	161.2033333	255.9566546	S	1614	0.127	32.50649514	20.47282333	204.978
CantonS	3	5	4668.205	161.2033333	255.9566546	S	1614	0.127	32.50649514	20.47282333	204.978
CantonS	3	6	4412.409	161.2033333	255.9566546	S	1614	0.127	32.50649514	20.47282333	204.978
CantonS	3	7	4441.368	161.2033333	255.9566546	S	1614	0.127	32.50649514	20.47282333	204.978
CantonS	3	8	5696.457	161.2033333	255.9566546	S	1614	0.127	32.50649514	20.47282333	204.978
CantonS	1	1	5914.481526	18.04334537	255.9566546	T	1060.38	0.24	61.42959711	4.33040289	254.4912
CantonS	1	2		18.04334537	255.9566546	T	1060.38	0.24	61.42959711	4.33040289	254.4912
CantonS	1	3	4707.354305	18.04334537	255.9566546	T	1060.38	0.24	61.42959711	4.33040289	254.4912
CantonS	1	4	5105.468567	18.04334537	255.9566546	T	1060.38	0.24	61.42959711	4.33040289	254.4912
CantonS	1	5	4361.627304	18.04334537	255.9566546	T	1060.38	0.24	61.42959711	4.33040289	254.4912
CantonS	1	6	5339.033165	18.04334537	255.9566546	T	1060.38	0.24	61.42959711	4.33040289	254.4912
CantonS	1	7	5418.158706	18.04334537	255.9566546	T	1060.38	0.24	61.42959711	4.33040289	254.4912
CantonS	1	8	5126.237032	18.04334537	255.9566546	T	1060.38	0.24	61.42959711	4.33040289	254.4912
CantonS	1	9	5534.914475	18.04334537	255.9566546	T	1060.38	0.24	61.42959711	4.33040289	254.4912
CantonS	1	10	5004.357293	18.04334537	255.9566546	T	1060.38	0.24	61.42959711	4.33040289	254.4912
CantonS	2	1	5121.800766	18.04334537	255.9566546	T	1060.38	0.24	61.42959711	4.33040289	254.4912
CantonS	2	2	4621.087458	18.04334537	255.9566546	T	1060.38	0.24	61.42959711	4.33040289	254.4912
CantonS	2	3	4880.938802	18.04334537	255.9566546	T	1060.38	0.24	61.42959711	4.33040289	254.4912
CantonS	2	4	4199.503853	18.04334537	255.9566546	T	1060.38	0.24	61.42959711	4.33040289	254.4912
CantonS	2	5	4530.020206	18.04334537	255.9566546	T	1060.38	0.24	61.42959711	4.33040289	254.4912
CantonS	2	6	3601.674407	18.04334537	255.9566546	T	1060.38	0.24	61.42959711	4.33040289	254.4912
CantonS	2	7	5895.358974	18.04334537	255.9566546	T	1060.38	0.24	61.42959711	4.33040289	254.4912
CantonS	2	8	3653.097217	18.04334537	255.9566546	T	1060.38	0.24	61.42959711	4.33040289	254.4912
CantonS	2	9	4321.372147	18.04334537	255.9566546	T	1060.38	0.24	61.42959711	4.33040289	254.4912
CantonS	2	10	4799.471321	18.04334537	255.9566546	T	1060.38	0.24	61.42959711	4.33040289	254.4912
CantonS	3	1	4965.819836	18.04334537	255.9566546	T	1060.38	0.24	61.42959711	4.33040289	254.4912
CantonS	3	2	5330.071159	18.04334537	255.9566546	T	1060.38	0.24	61.42959711	4.33040289	254.4912
CantonS	3	3	5052.251066	18.04334537	255.9566546	T	1060.38	0.24	61.42959711	4.33040289	254.4912
CantonS	3	4	5518.011096	18.04334537	255.9566546	T	1060.38	0.24	61.42959711	4.33040289	254.4912
CantonS	3	5	4123.831399	18.04334537	255.9566546	T	1060.38	0.24	61.42959711	4.33040289	254.4912
CantonS	3	6	5150.823764	18.04334537	255.9566546	T	1060.38	0.24	61.42959711	4.33040289	254.4912
CantonS	3	7	4916.885663	18.04334537	255.9566546	T	1060.38	0.24	61.42959711	4.33040289	254.4912
CantonS	1	1	4465.227	0	274	U	1060.38	0.579	158.646	0	613.96002
CantonS	1	2	3878.366	0	274	U	1060.38	0.579	158.646	0	613.96002
CantonS	1	3	3583.233	0	274	U	1060.38	0.579	158.646	0	613.96002
CantonS	1	4	4444.853	0	274	U	1060.38	0.579	158.646	0	613.96002
CantonS	1	5	4708.095	0	274	U	1060.38	0.579	158.646	0	613.96002
CantonS	1	6	3674.073	0	274	U	1060.38	0.579	158.646	0	613.96002
CantonS	1	7	4103.185	0	274	U	1060.38	0.579	158.646	0	613.96002
CantonS	1	8	3221.338	0	274	U	1060.38	0.579	158.646	0	613.96002
CantonS	1	9	3859.832	0	274	U	1060.38	0.579	158.646	0	613.96002
CantonS	2	1	3804.032	0	274	U	1060.38	0.579	158.646	0	613.96002
CantonS	2	2	3472.017	0	274	U	1060.38	0.579	158.646	0	613.96002
CantonS	2	3	3373.779	0	274	U	1060.38	0.579	158.646	0	613.96002
CantonS	2	4	4139.275	0	274	U	1060.38	0.579	158.646	0	613.96002
CantonS	2	5	4301.414	0	274	U	1060.38	0.579	158.646	0	613.96002
CantonS	2	6	4792.642	0	274	U	1060.38	0.579	158.646	0	613.96002
CantonS	2	7	4032.585	0	274	U	1060.38	0.579	158.646	0	613.96002
CantonS	2	8	4334.907	0	274	U	1060.38	0.579	158.646	0	613.96002
CantonS	2	9	3825.303	0	274	U	1060.38	0.579	158.646	0	613.96002
CantonS	3	1	4730.135	0	274	U	1060.38	0.579	158.646	0	613.96002
CantonS	3	2	3715.221	0	274	U	1060.38	0.579	158.646	0	613.96002
CantonS	3	3	3724.426	0	274	U	1060.38	0.579	158.646	0	613.96002
CantonS	3	4	4144.483	0	274	U	1060.38	0.579	158.646	0	613.96002
CantonS	3	5	4316.738	0	274	U	1060.38	0.579	158.646	0	613.96002
CantonS	3	6	4238.252	0	274	U	1060.38	0.579	158.646	0	613.96002
CantonS	3	7	4112.374	0	274	U	1060.38	0.579	158.646	0	613.96002
CantonS	2	1	4564.521463	46.66871044	32.65487671	V	306	0.233	7.608586273	10.87380953	71.298
CantonS	2	2	5523.187974	46.66871044	32.65487671	V	306	0.233	7.608586273	10.87380953	71.298
CantonS	2	3	4655.36194	46.66871044	32.65487671	V	306	0.233	7.608586273	10.87380953	71.298
CantonS	2	4	6440.399732	46.66871044	32.65487671	V	306	0.233	7.608586273	10.87380953	71.298
CantonS	2	5	5707.095384	46.66871044	32.65487671	V	306	0.233	7.608586273	10.87380953	71.298
CantonS	2	6	6857.133138	46.66871044	32.65487671	V	306	0.233	7.608586273	10.87380953	71.298
CantonS	2	7	5419.227008	46.66871044	32.65487671	V	306	0.233	7.608586273	10.87380953	71.298
CantonS	2	8	5637.981588	46.66871044	32.65487671	V	306	0.233	7.608586273	10.87380953	71.298
CantonS	2	9	6093.966178	46.66871044	32.65487671	V	306	0.233	7.608586273	10.87380953	71.298
CantonS	2	10	5378.288294	46.66871044	32.65487671	V	306	0.233	7.608586273	10.87380953	71.298
CantonS	2	11	7127.582091	46.66871044	32.65487671	V	306	0.233	7.608586273	10.87380953	71.298
CantonS	2	12	5927.470908	46.66871044	32.65487671	V	306	0.233	7.608586273	10.87380953	71.298
CantonS	3	1	6688.463431	46.66871044	32.65487671	V	306	0.233	7.608586273	10.87380953	71.298
CantonS	3	2	6159.491634	46.66871044	32.65487671	V	306	0.233	7.608586273	10.87380953	71.298
CantonS	3	3	6135.244063	46.66871044	32.65487671	V	306	0.233	7.608586273	10.87380953	71.298
CantonS	3	4	5330.364332	46.66871044	32.65487671	V	306	0.233	7.608586273	10.87380953	71.298
CantonS	3	5	5911.583995	46.66871044	32.65487671	V	306	0.233	7.608586273	10.87380953	71.298
CantonS	3	6	5368.111097	46.66871044	32.65487671	V	306	0.233	7.608586273	10.87380953	71.298
CantonS	3	7	6128.165179	46.66871044	32.65487671	V	306	0.233	7.608586273	10.87380953	71.298
CantonS	3	8	5060.597881	46.66871044	32.65487671	V	306	0.233	7.608586273	10.87380953	71.298
CantonS	3	9	5329.251104	46.66871044	32.65487671	V	306	0.233	7.608586273	10.87380953	71.298
CantonS	3	10	5541.148405	46.66871044	32.65487671	V	306	0.233	7.608586273	10.87380953	71.298
CantonS	3	11	5145.766095	46.66871044	32.65487671	V	306	0.233	7.608586273	10.87380953	71.298
CantonS	2	1	4544.023495	30.65827693	48.66531022	W	306	0.365	17.76283823	11.19027108	111.69
CantonS	2	2	4860.198044	30.65827693	48.66531022	W	306	0.365	17.76283823	11.19027108	111.69
CantonS	2	3	4714.395297	30.65827693	48.66531022	W	306	0.365	17.76283823	11.19027108	111.69
CantonS	2	4	5112.227749	30.65827693	48.66531022	W	306	0.365	17.76283823	11.19027108	111.69
CantonS	2	5	5099.176967	30.65827693	48.66531022	W	306	0.365	17.76283823	11.19027108	111.69
CantonS	2	6	4486.384274	30.65827693	48.66531022	W	306	0.365	17.76283823	11.19027108	111.69
CantonS	2	7	4668.358621	30.65827693	48.66531022	W	306	0.365	17.76283823	11.19027108	111.69
CantonS	2	8	5175.166769	30.65827693	48.66531022	W	306	0.365	17.76283823	11.19027108	111.69
CantonS	2	9	6012.350932	30.65827693	48.66531022	W	306	0.365	17.76283823	11.19027108	111.69
CantonS	2	10	5178.248435	30.65827693	48.66531022	W	306	0.365	17.76283823	11.19027108	111.69
CantonS	3	1	4759.469602	30.65827693	48.66531022	W	306	0.365	17.76283823	11.19027108	111.69
CantonS	3	2	6665.686986	30.65827693	48.66531022	W	306	0.365	17.76283823	11.19027108	111.69
CantonS	3	3	5908.165239	30.65827693	48.66531022	W	306	0.365	17.76283823	11.19027108	111.69
CantonS	3	4	7324.075225	30.65827693	48.66531022	W	306	0.365	17.76283823	11.19027108	111.69
CantonS	3	5	4938.231193	30.65827693	48.66531022	W	306	0.365	17.76283823	11.19027108	111.69
CantonS	3	6	5686.375811	30.65827693	48.66531022	W	306	0.365	17.76283823	11.19027108	111.69
CantonS	3	7	5126.096286	30.65827693	48.66531022	W	306	0.365	17.76283823	11.19027108	111.69
CantonS	3	8	6796.288444	30.65827693	48.66531022	W	306	0.365	17.76283823	11.19027108	111.69
CantonS	3	9	6060.357085	30.65827693	48.66531022	W	306	0.365	17.76283823	11.19027108	111.69
CantonS	3	10	6256.840855	30.65827693	48.66531022	W	306	0.365	17.76283823	11.19027108	111.69
CantonS	3	11	5475.191184	30.65827693	48.66531022	W	306	0.365	17.76283823	11.19027108	111.69
CantonS	1	1	5303.791466	10.59	7.4	X	69	1.385	10.249	14.66715	95.565
CantonS	1	2	5809.86093	10.59	7.4	X	69	1.385	10.249	14.66715	95.565
CantonS	1	3	4442.720752	10.59	7.4	X	69	1.385	10.249	14.66715	95.565
CantonS	1	4	4009.18488	10.59	7.4	X	69	1.385	10.249	14.66715	95.565
CantonS	1	5	4457.125095	10.59	7.4	X	69	1.385	10.249	14.66715	95.565
CantonS	1	6		10.59	7.4	X	69	1.385	10.249	14.66715	95.565
CantonS	1	7	4235.662353	10.59	7.4	X	69	1.385	10.249	14.66715	95.565
CantonS	1	8	4841.832897	10.59	7.4	X	69	1.385	10.249	14.66715	95.565
CantonS	1	9	3950.87148	10.59	7.4	X	69	1.385	10.249	14.66715	95.565
CantonS	2	1	4483.690678	10.59	7.4	X	69	1.385	10.249	14.66715	95.565
CantonS	2	2	4216.319229	10.59	7.4	X	69	1.385	10.249	14.66715	95.565
CantonS	2	3	5251.208591	10.59	7.4	X	69	1.385	10.249	14.66715	95.565
CantonS	2	4		10.59	7.4	X	69	1.385	10.249	14.66715	95.565
CantonS	2	5	4783.339508	10.59	7.4	X	69	1.385	10.249	14.66715	95.565
CantonS	2	6	5202.262956	10.59	7.4	X	69	1.385	10.249	14.66715	95.565
CantonS	2	7	5218.61701	10.59	7.4	X	69	1.385	10.249	14.66715	95.565
CantonS	2	8	5174.212722	10.59	7.4	X	69	1.385	10.249	14.66715	95.565
CantonS	2	9	4578.296364	10.59	7.4	X	69	1.385	10.249	14.66715	95.565
CantonS	2	10	5217.745154	10.59	7.4	X	69	1.385	10.249	14.66715	95.565
CantonS	3	1	6362.885743	10.59	7.4	X	69	1.385	10.249	14.66715	95.565
CantonS	3	2	5159.700178	10.59	7.4	X	69	1.385	10.249	14.66715	95.565
CantonS	3	3	5891.410632	10.59	7.4	X	69	1.385	10.249	14.66715	95.565
CantonS	3	4	5459.037928	10.59	7.4	X	69	1.385	10.249	14.66715	95.565
CantonS	3	5	4854.880558	10.59	7.4	X	69	1.385	10.249	14.66715	95.565
CantonS	3	6	4040.904607	10.59	7.4	X	69	1.385	10.249	14.66715	95.565
CantonS	3	7	5182.350734	10.59	7.4	X	69	1.385	10.249	14.66715	95.565
CantonS	3	8	4461.058849	10.59	7.4	X	69	1.385	10.249	14.66715	95.565
CantonS	3	9	4289.754848	10.59	7.4	X	69	1.385	10.249	14.66715	95.565
CantonS	1	1	5534.662549	105.9	74.1	Y	696.4065	0.142	10.5222	15.0378	98.889723
CantonS	1	2	6370.851048	105.9	74.1	Y	696.4065	0.142	10.5222	15.0378	98.889723
CantonS	1	3	6285.080442	105.9	74.1	Y	696.4065	0.142	10.5222	15.0378	98.889723
CantonS	1	4	6882.244241	105.9	74.1	Y	696.4065	0.142	10.5222	15.0378	98.889723
CantonS	1	5	6804.379637	105.9	74.1	Y	696.4065	0.142	10.5222	15.0378	98.889723
CantonS	1	6	6360.271217	105.9	74.1	Y	696.4065	0.142	10.5222	15.0378	98.889723
CantonS	1	7	5512.00471	105.9	74.1	Y	696.4065	0.142	10.5222	15.0378	98.889723
CantonS	1	8	8108.926208	105.9	74.1	Y	696.4065	0.142	10.5222	15.0378	98.889723
CantonS	1	9	7034.128128	105.9	74.1	Y	696.4065	0.142	10.5222	15.0378	98.889723
CantonS	1	10	5113.544896	105.9	74.1	Y	696.4065	0.142	10.5222	15.0378	98.889723
CantonS	2	1	4868.786549	105.9	74.1	Y	696.4065	0.142	10.5222	15.0378	98.889723
CantonS	2	2	6341.859252	105.9	74.1	Y	696.4065	0.142	10.5222	15.0378	98.889723
CantonS	2	3	7209.662397	105.9	74.1	Y	696.4065	0.142	10.5222	15.0378	98.889723
CantonS	2	4	6206.642578	105.9	74.1	Y	696.4065	0.142	10.5222	15.0378	98.889723
CantonS	2	5	6460.650084	105.9	74.1	Y	696.4065	0.142	10.5222	15.0378	98.889723
CantonS	2	6	5453.893148	105.9	74.1	Y	696.4065	0.142	10.5222	15.0378	98.889723
CantonS	2	7	6798.637668	105.9	74.1	Y	696.4065	0.142	10.5222	15.0378	98.889723
CantonS	2	8	5543.402953	105.9	74.1	Y	696.4065	0.142	10.5222	15.0378	98.889723
CantonS	2	9	4683.403851	105.9	74.1	Y	696.4065	0.142	10.5222	15.0378	98.889723
CantonS	2	10	6087.282647	105.9	74.1	Y	696.4065	0.142	10.5222	15.0378	98.889723
CantonS	2	11	5718.12883	105.9	74.1	Y	696.4065	0.142	10.5222	15.0378	98.889723
CantonS	3	1	5669.579588	105.9	74.1	Y	696.4065	0.142	10.5222	15.0378	98.889723
CantonS	3	2	6084.235314	105.9	74.1	Y	696.4065	0.142	10.5222	15.0378	98.889723
CantonS	3	3	5731.854832	105.9	74.1	Y	696.4065	0.142	10.5222	15.0378	98.889723
CantonS	3	4	7006.870679	105.9	74.1	Y	696.4065	0.142	10.5222	15.0378	98.889723
CantonS	3	5	5031.396964	105.9	74.1	Y	696.4065	0.142	10.5222	15.0378	98.889723
CantonS	3	6	6206.255549	105.9	74.1	Y	696.4065	0.142	10.5222	15.0378	98.889723
CantonS	1	1	6175.243	105.9	74.1	Y	696.4065	0.142	10.5222	15.0378	98.889723
CantonS	1	2	6731.377	105.9	74.1	Y	696.4065	0.142	10.5222	15.0378	98.889723
CantonS	1	3	6793.504	105.9	74.1	Y	696.4065	0.142	10.5222	15.0378	98.889723
CantonS	1	4	6421.037	105.9	74.1	Y	696.4065	0.142	10.5222	15.0378	98.889723
CantonS	1	5	7579.775	105.9	74.1	Y	696.4065	0.142	10.5222	15.0378	98.889723
CantonS	1	6	7112.565	105.9	74.1	Y	696.4065	0.142	10.5222	15.0378	98.889723
CantonS	1	7	4975.253	105.9	74.1	Y	696.4065	0.142	10.5222	15.0378	98.889723
CantonS	1	1	5682.584	105.9	74.1	Y	696.4065	0.142	10.5222	15.0378	98.889723
CantonS	1	2	6084.225	105.9	74.1	Y	696.4065	0.142	10.5222	15.0378	98.889723
CantonS	1	3	5922.447	105.9	74.1	Y	696.4065	0.142	10.5222	15.0378	98.889723
CantonS	1	4	5887.842	105.9	74.1	Y	696.4065	0.142	10.5222	15.0378	98.889723
CantonS	1	5	5913.814	105.9	74.1	Y	696.4065	0.142	10.5222	15.0378	98.889723
CantonS	1	6	7129.107	105.9	74.1	Y	696.4065	0.142	10.5222	15.0378	98.889723
CantonS	2	3	6739.236	105.9	74.1	Y	696.4065	0.142	10.5222	15.0378	98.889723
CantonS	2	4	7779.025	105.9	74.1	Y	696.4065	0.142	10.5222	15.0378	98.889723
CantonS	2	5	7071.391	105.9	74.1	Y	696.4065	0.142	10.5222	15.0378	98.889723
CantonS	2	6	6485.011	105.9	74.1	Y	696.4065	0.142	10.5222	15.0378	98.889723
CantonS	2	7	6176.002	105.9	74.1	Y	696.4065	0.142	10.5222	15.0378	98.889723
CantonS	2	8	7507.474	105.9	74.1	Y	696.4065	0.142	10.5222	15.0378	98.889723
CantonS	2	9	7167.601	105.9	74.1	Y	696.4065	0.142	10.5222	15.0378	98.889723
CantonS	2	1	6680.632	105.9	74.1	Y	696.4065	0.142	10.5222	15.0378	98.889723
CantonS	2	2	7222.704	105.9	74.1	Y	696.4065	0.142	10.5222	15.0378	98.889723
CantonS	2	3	4478.344	105.9	74.1	Y	696.4065	0.142	10.5222	15.0378	98.889723
CantonS	2	4	6296.869	105.9	74.1	Y	696.4065	0.142	10.5222	15.0378	98.889723
CantonS	2	5	6037.69	105.9	74.1	Y	696.4065	0.142	10.5222	15.0378	98.889723
CantonS	2	6	7040.031	105.9	74.1	Y	696.4065	0.142	10.5222	15.0378	98.889723
CantonS	2	7	5841.01	105.9	74.1	Y	696.4065	0.142	10.5222	15.0378	98.889723
CantonS	2	8	5643.523	105.9	74.1	Y	696.4065	0.142	10.5222	15.0378	98.889723
CantonS	2	9	5552.437	105.9	74.1	Y	696.4065	0.142	10.5222	15.0378	98.889723
CantonS	3	1	5815.884	105.9	74.1	Y	696.4065	0.142	10.5222	15.0378	98.889723
CantonS	3	3	5840.681	105.9	74.1	Y	696.4065	0.142	10.5222	15.0378	98.889723
CantonS	3	4	6937.5	105.9	74.1	Y	696.4065	0.142	10.5222	15.0378	98.889723
CantonS	3	5	5979.997	105.9	74.1	Y	696.4065	0.142	10.5222	15.0378	98.889723
CantonS	3	6	6130.813	105.9	74.1	Y	696.4065	0.142	10.5222	15.0378	98.889723
CantonS	3	7	5370.453	105.9	74.1	Y	696.4065	0.142	10.5222	15.0378	98.889723
CantonS	3	8	6735.917	105.9	74.1	Y	696.4065	0.142	10.5222	15.0378	98.889723
CantonS	3	9	6670.181	105.9	74.1	Y	696.4065	0.142	10.5222	15.0378	98.889723
CantonS	3	3	6661.366	105.9	74.1	Y	696.4065	0.142	10.5222	15.0378	98.889723
CantonS	3	4	5449.197	105.9	74.1	Y	696.4065	0.142	10.5222	15.0378	98.889723
CantonS	3	5	4491.757	105.9	74.1	Y	696.4065	0.142	10.5222	15.0378	98.889723
CantonS	3	6	5209.049	105.9	74.1	Y	696.4065	0.142	10.5222	15.0378	98.889723
CantonS	3	7	6821.751	105.9	74.1	Y	696.4065	0.142	10.5222	15.0378	98.889723
CantonS	1	1	5766.591	105.9	74.1	Y	696.4065	0.142	10.5222	15.0378	98.889723
CantonS	1	2	5701.027	105.9	74.1	Y	696.4065	0.142	10.5222	15.0378	98.889723
CantonS	1	3	7001.011	105.9	74.1	Y	696.4065	0.142	10.5222	15.0378	98.889723
CantonS	1	4	6923.413	105.9	74.1	Y	696.4065	0.142	10.5222	15.0378	98.889723
CantonS	1	5	5908.774	105.9	74.1	Y	696.4065	0.142	10.5222	15.0378	98.889723
CantonS	1	6	6400.9	105.9	74.1	Y	696.4065	0.142	10.5222	15.0378	98.889723
CantonS	1	7	6376.486	105.9	74.1	Y	696.4065	0.142	10.5222	15.0378	98.889723
CantonS	1	8	5577.43	105.9	74.1	Y	696.4065	0.142	10.5222	15.0378	98.889723
CantonS	1	9	5642.892	105.9	74.1	Y	696.4065	0.142	10.5222	15.0378	98.889723
CantonS	1	10	5828.051	105.9	74.1	Y	696.4065	0.142	10.5222	15.0378	98.889723
CantonS	2	1	6480.507	105.9	74.1	Y	696.4065	0.142	10.5222	15.0378	98.889723
CantonS	2	2	5837.21	105.9	74.1	Y	696.4065	0.142	10.5222	15.0378	98.889723
CantonS	2	3	6222.978	105.9	74.1	Y	696.4065	0.142	10.5222	15.0378	98.889723
CantonS	2	4	4711.122	105.9	74.1	Y	696.4065	0.142	10.5222	15.0378	98.889723
CantonS	2	5	5460.309	105.9	74.1	Y	696.4065	0.142	10.5222	15.0378	98.889723
CantonS	2	6	5065.637	105.9	74.1	Y	696.4065	0.142	10.5222	15.0378	98.889723
CantonS	2	7	5406.8	105.9	74.1	Y	696.4065	0.142	10.5222	15.0378	98.889723
CantonS	2	8	5248.875	105.9	74.1	Y	696.4065	0.142	10.5222	15.0378	98.889723
CantonS	3	1	6373.39	105.9	74.1	Y	696.4065	0.142	10.5222	15.0378	98.889723
CantonS	3	2	5910.177	105.9	74.1	Y	696.4065	0.142	10.5222	15.0378	98.889723
CantonS	3	3	5856.616	105.9	74.1	Y	696.4065	0.142	10.5222	15.0378	98.889723
CantonS	3	4	6754.067	105.9	74.1	Y	696.4065	0.142	10.5222	15.0378	98.889723
CantonS	3	5	5918.805	105.9	74.1	Y	696.4065	0.142	10.5222	15.0378	98.889723
CantonS	3	6	5824.361	105.9	74.1	Y	696.4065	0.142	10.5222	15.0378	98.889723
CantonS	3	7	5424.217	105.9	74.1	Y	696.4065	0.142	10.5222	15.0378	98.889723
CantonS	3	8	5454.077	105.9	74.1	Y	696.4065	0.142	10.5222	15.0378	98.889723
CantonS	1	1	5539.572	46.66871044	74.1	Z	467	0.123	9.1143	5.740251384	57.441
CantonS	1	2	6480.162	46.66871044	74.1	Z	467	0.123	9.1143	5.740251384	57.441
CantonS	1	3	5955.762	46.66871044	74.1	Z	467	0.123	9.1143	5.740251384	57.441
CantonS	1	4	6045.269	46.66871044	74.1	Z	467	0.123	9.1143	5.740251384	57.441
CantonS	1	5	6304.898	46.66871044	74.1	Z	467	0.123	9.1143	5.740251384	57.441
CantonS	1	6	6433.697	46.66871044	74.1	Z	467	0.123	9.1143	5.740251384	57.441
CantonS	1	7	5017.456	46.66871044	74.1	Z	467	0.123	9.1143	5.740251384	57.441
CantonS	1	8	5421.898	46.66871044	74.1	Z	467	0.123	9.1143	5.740251384	57.441
CantonS	2	1	6530.823	46.66871044	74.1	Z	467	0.123	9.1143	5.740251384	57.441
CantonS	2	2	4459.477	46.66871044	74.1	Z	467	0.123	9.1143	5.740251384	57.441
CantonS	2	3	6883.617	46.66871044	74.1	Z	467	0.123	9.1143	5.740251384	57.441
CantonS	2	4	6822.109	46.66871044	74.1	Z	467	0.123	9.1143	5.740251384	57.441
CantonS	2	5	7156.095	46.66871044	74.1	Z	467	0.123	9.1143	5.740251384	57.441
CantonS	2	6	6048.425	46.66871044	74.1	Z	467	0.123	9.1143	5.740251384	57.441
CantonS	2	7	6503.914	46.66871044	74.1	Z	467	0.123	9.1143	5.740251384	57.441
CantonS	2	8	5709.798	46.66871044	74.1	Z	467	0.123	9.1143	5.740251384	57.441
CantonS	2	9	6575.18	46.66871044	74.1	Z	467	0.123	9.1143	5.740251384	57.441
CantonS	2	10	6198.101	46.66871044	74.1	Z	467	0.123	9.1143	5.740251384	57.441
CantonS	3	1	5018.916	46.66871044	74.1	Z	467	0.123	9.1143	5.740251384	57.441
CantonS	3	2	5338.104	46.66871044	74.1	Z	467	0.123	9.1143	5.740251384	57.441
CantonS	3	3	4882.952	46.66871044	74.1	Z	467	0.123	9.1143	5.740251384	57.441
CantonS	3	4	6113.324	46.66871044	74.1	Z	467	0.123	9.1143	5.740251384	57.441
CantonS	3	5	5447.665	46.66871044	74.1	Z	467	0.123	9.1143	5.740251384	57.441
CantonS	3	6	5503.067	46.66871044	74.1	Z	467	0.123	9.1143	5.740251384	57.441
CantonS	3	7	4985.89	46.66871044	74.1	Z	467	0.123	9.1143	5.740251384	57.441
CantonS	3	8	5033.695	46.66871044	74.1	Z	467	0.123	9.1143	5.740251384	57.441
CantonS	1	1	4528.836771	5.223587151	74.1	AA	306	1.01	74.841	5.275823022	309.06
CantonS	1	2	5527.588867	5.223587151	74.1	AA	306	1.01	74.841	5.275823022	309.06
CantonS	1	3	5050.417564	5.223587151	74.1	AA	306	1.01	74.841	5.275823022	309.06
CantonS	1	4	5204.969038	5.223587151	74.1	AA	306	1.01	74.841	5.275823022	309.06
CantonS	1	5	4079.239198	5.223587151	74.1	AA	306	1.01	74.841	5.275823022	309.06
CantonS	1	6	3779.834863	5.223587151	74.1	AA	306	1.01	74.841	5.275823022	309.06
CantonS	1	7	3281.626664	5.223587151	74.1	AA	306	1.01	74.841	5.275823022	309.06
CantonS	1	8	4822.876802	5.223587151	74.1	AA	306	1.01	74.841	5.275823022	309.06
CantonS	1	9	3780.201084	5.223587151	74.1	AA	306	1.01	74.841	5.275823022	309.06
CantonS	2	1	4747.954451	5.223587151	74.1	AA	306	1.01	74.841	5.275823022	309.06
CantonS	2	2	3343.843646	5.223587151	74.1	AA	306	1.01	74.841	5.275823022	309.06
CantonS	2	3	2747.715046	5.223587151	74.1	AA	306	1.01	74.841	5.275823022	309.06
CantonS	2	4	2595.070626	5.223587151	74.1	AA	306	1.01	74.841	5.275823022	309.06
CantonS	2	5	3685.255187	5.223587151	74.1	AA	306	1.01	74.841	5.275823022	309.06
CantonS	2	6	3100.364991	5.223587151	74.1	AA	306	1.01	74.841	5.275823022	309.06
CantonS	2	7	4770.022383	5.223587151	74.1	AA	306	1.01	74.841	5.275823022	309.06
CantonS	2	8	3651.612801	5.223587151	74.1	AA	306	1.01	74.841	5.275823022	309.06
CantonS	2	9	3968.717468	5.223587151	74.1	AA	306	1.01	74.841	5.275823022	309.06
CantonS	3	1	3596.307198	5.223587151	74.1	AA	306	1.01	74.841	5.275823022	309.06
CantonS	3	2	5124.903987	5.223587151	74.1	AA	306	1.01	74.841	5.275823022	309.06
CantonS	3	3	3792.493414	5.223587151	74.1	AA	306	1.01	74.841	5.275823022	309.06
CantonS	3	4	3955.164172	5.223587151	74.1	AA	306	1.01	74.841	5.275823022	309.06
CantonS	3	5	3776.512864	5.223587151	74.1	AA	306	1.01	74.841	5.275823022	309.06
CantonS	3	6	3695.786119	5.223587151	74.1	AA	306	1.01	74.841	5.275823022	309.06
CantonS	3	7	4217.934971	5.223587151	74.1	AA	306	1.01	74.841	5.275823022	309.06
CantonS	2	1	4760.782	5.223587151	74.1	AA	306	1.01	74.841	5.275823022	309.06
CantonS	2	2	4459.716	5.223587151	74.1	AA	306	1.01	74.841	5.275823022	309.06
CantonS	2	3	3625.861	5.223587151	74.1	AA	306	1.01	74.841	5.275823022	309.06
CantonS	2	4	4510.038	5.223587151	74.1	AA	306	1.01	74.841	5.275823022	309.06
CantonS	2	5	3944.033	5.223587151	74.1	AA	306	1.01	74.841	5.275823022	309.06
CantonS	2	6	4853.368	5.223587151	74.1	AA	306	1.01	74.841	5.275823022	309.06
CantonS	2	7	4777.883	5.223587151	74.1	AA	306	1.01	74.841	5.275823022	309.06
CantonS	2	8	4513.017	5.223587151	74.1	AA	306	1.01	74.841	5.275823022	309.06
CantonS	3	1	4972.593	5.223587151	74.1	AA	306	1.01	74.841	5.275823022	309.06
CantonS	3	2	5084.119	5.223587151	74.1	AA	306	1.01	74.841	5.275823022	309.06
CantonS	3	4	5320.143	5.223587151	74.1	AA	306	1.01	74.841	5.275823022	309.06
CantonS	3	5	3755.232	5.223587151	74.1	AA	306	1.01	74.841	5.275823022	309.06
CantonS	3	6	4344.104	5.223587151	74.1	AA	306	1.01	74.841	5.275823022	309.06
CantonS	3	7	4574.819	5.223587151	74.1	AA	306	1.01	74.841	5.275823022	309.06
CantonS	3	8	4626.768	5.223587151	74.1	AA	306	1.01	74.841	5.275823022	309.06
CantonS	3	9	5167.365	5.223587151	74.1	AA	306	1.01	74.841	5.275823022	309.06
CantonS	3	10	5215.213	5.223587151	74.1	AA	306	1.01	74.841	5.275823022	309.06
CantonS	3	11	4230.619	5.223587151	74.1	AA	306	1.01	74.841	5.275823022	309.06
CantonS	1	1	4789.057	0	79.32358715	AB	306	1.139	90.34956576	0	348.534
CantonS	1	2	3879.141	0	79.32358715	AB	306	1.139	90.34956576	0	348.534
CantonS	1	3	3955.851	0	79.32358715	AB	306	1.139	90.34956576	0	348.534
CantonS	1	4	4247.954	0	79.32358715	AB	306	1.139	90.34956576	0	348.534
CantonS	1	5	4094.921	0	79.32358715	AB	306	1.139	90.34956576	0	348.534
CantonS	1	6	5221.878	0	79.32358715	AB	306	1.139	90.34956576	0	348.534
CantonS	1	7	4013.766	0	79.32358715	AB	306	1.139	90.34956576	0	348.534
CantonS	1	8	4026.551	0	79.32358715	AB	306	1.139	90.34956576	0	348.534
CantonS	1	9	4463.484	0	79.32358715	AB	306	1.139	90.34956576	0	348.534
CantonS	2	1	4288.817	0	79.32358715	AB	306	1.139	90.34956576	0	348.534
CantonS	2	2	3603.189	0	79.32358715	AB	306	1.139	90.34956576	0	348.534
CantonS	2	3	4642.691	0	79.32358715	AB	306	1.139	90.34956576	0	348.534
CantonS	2	4	3682.475	0	79.32358715	AB	306	1.139	90.34956576	0	348.534
CantonS	2	5	4176.714	0	79.32358715	AB	306	1.139	90.34956576	0	348.534
CantonS	2	6	4420.733	0	79.32358715	AB	306	1.139	90.34956576	0	348.534
CantonS	3	1	3602.76	0	79.32358715	AB	306	1.139	90.34956576	0	348.534
CantonS	3	2	3511.609	0	79.32358715	AB	306	1.139	90.34956576	0	348.534
CantonS	3	3	3017.901	0	79.32358715	AB	306	1.139	90.34956576	0	348.534
CantonS	3	4	3345.986	0	79.32358715	AB	306	1.139	90.34956576	0	348.534
CantonS	3	5	3611.617	0	79.32358715	AB	306	1.139	90.34956576	0	348.534
CantonS	3	6	4089.443	0	79.32358715	AB	306	1.139	90.34956576	0	348.534
