# Supplementary material for: Multiscale analysis reveals that diet-dependent midgut plasticity emerges from alterations in both stem cell niche coupling and enterocyte size
Source: eLife. 2021 Sep 23;10:e64125. doi: 10.7554/eLife.64125 (PMC8528489; doi:10.7554/eLife.64125)
Supplement: Figure 2—figure supplement 2—source data 2. [file elife-64125-fig2-figsupp2-data2.csv]

Line	Food	Repeat	Total.L
CantonS	HS	1	4985.685
CantonS	HS	1	3841.359
CantonS	HS	1	5723.491
CantonS	HS	1	4538.927
CantonS	HS	1	5663.111
CantonS	HS	1	5204.575
CantonS	HS	1	4684.456
CantonS	HS	1	4341.901
CantonS	HS	2	5859.056
CantonS	HS	2	5102.07
CantonS	HS	2	5980.964
CantonS	HS	2	4315.709
CantonS	HS	2	5408.182
CantonS	HS	2	3565.33
CantonS	HS	2	5786.047
CantonS	HS	2	4214.09
CantonS	HS	3	4059.861
CantonS	HS	3	3751.527
CantonS	HS	3	4630.501
CantonS	HS	3	4637.797
CantonS	HS	3	4374.318
CantonS	HS	3	4824.424
CantonS	HS	3	4159.537
CantonS	HY	1	5682.584
CantonS	HY	1	6084.225
CantonS	HY	1	5922.447
CantonS	HY	1	5887.842
CantonS	HY	1	5913.814
CantonS	HY	1	7129.107
CantonS	HY	2	6680.632
CantonS	HY	2	7222.704
CantonS	HY	2	4478.344
CantonS	HY	2	6296.869
CantonS	HY	2	6037.69
CantonS	HY	2	7040.031
CantonS	HY	2	5841.01
CantonS	HY	2	5643.523
CantonS	HY	2	5552.437
CantonS	HY	3	6661.366
CantonS	HY	3	5449.197
CantonS	HY	3	4491.757
CantonS	HY	3	5209.049
CantonS	HY	3	6821.751
CantonS	HS Agar 0.5%	1	4215.91
CantonS	HS Agar 0.5%	1	4352.239
CantonS	HS Agar 0.5%	1	4249.509
CantonS	HS Agar 0.5%	1	4862.002
CantonS	HS Agar 0.5%	1	4529.389
CantonS	HS Agar 0.5%	1	4523.184
CantonS	HS Agar 0.5%	1	4756.879
CantonS	HS Agar 0.5%	1	4060.534
CantonS	HS Agar 0.5%	1	4345.32
CantonS	HS Agar 0.5%	2	4675.252
CantonS	HS Agar 0.5%	2	5014.488
CantonS	HS Agar 0.5%	2	5215.803
CantonS	HS Agar 0.5%	2	5226.174
CantonS	HS Agar 0.5%	2	4873.247
CantonS	HS Agar 0.5%	2	4477.019
CantonS	HS Agar 0.5%	2	5052.493
CantonS	HS Agar 0.5%	2	3796.118
CantonS	HS Agar 0.5%	2	4436.835
CantonS	HS Agar 0.5%	3	4801.756
CantonS	HS Agar 0.5%	3	4433.758
CantonS	HS Agar 0.5%	3	4845.379
CantonS	HS Agar 0.5%	3	4860.384
CantonS	HS Agar 0.5%	3	4337.758
CantonS	HS Agar 0.5%	3	4671.248
CantonS	HS Agar 0.5%	3	3502.428
CantonS	HS Agar 0.5%	3	3584.34
CantonS	HS Agar 1%	1	4817.757
CantonS	HS Agar 1%	1	5565.054
CantonS	HS Agar 1%	1	6064.779
CantonS	HS Agar 1%	1	4576.4
CantonS	HS Agar 1%	1	5253.658
CantonS	HS Agar 1%	1	5178.761
CantonS	HS Agar 1%	1	4783.711
CantonS	HS Agar 1%	1	3692.618
CantonS	HS Agar 1%	1	4823.595
CantonS	HS Agar 1%	2	4547.54
CantonS	HS Agar 1%	2	4260.017
CantonS	HS Agar 1%	2	5331.774
CantonS	HS Agar 1%	2	4062.053
CantonS	HS Agar 1%	2	5317.283
CantonS	HS Agar 1%	2	3528.978
CantonS	HS Agar 1%	2	4185.688
CantonS	HS Agar 1%	3	4585.875
CantonS	HS Agar 1%	3	4826.828
CantonS	HS Agar 1%	3	4997.057
CantonS	HS Agar 1%	3	3916.221
CantonS	HS Agar 1%	3	3433.27
CantonS	HS Agar 1%	3	4562.775
CantonS	HS Agar 1%	3	5095.555
CantonS	HS Agar 1%	3	3621.545
CantonS	HS Agar 1%	3	5046.4
CantonS	HS Agar 3%	1	4967.469
CantonS	HS Agar 3%	1	4608.731
CantonS	HS Agar 3%	1	3957.425
CantonS	HS Agar 3%	1	4589.314
CantonS	HS Agar 3%	1	5060.735
CantonS	HS Agar 3%	1	4201.035
CantonS	HS Agar 3%	1	5338.254
CantonS	HS Agar 3%	1	4670.274
CantonS	HS Agar 3%	1	3206.162
CantonS	HS Agar 3%	2	3916.552
CantonS	HS Agar 3%	2	4382.416
CantonS	HS Agar 3%	2	4699.915
CantonS	HS Agar 3%	2	4754.067
CantonS	HS Agar 3%	2	4017.4
CantonS	HS Agar 3%	2	3731.08
CantonS	HS Agar 3%	2	3655.504
CantonS	HS Agar 3%	3	3445.142
CantonS	HS Agar 3%	3	4067.207
CantonS	HS Agar 3%	3	4666.568
CantonS	HS Agar 3%	3	3996.535
CantonS	HS Agar 3%	3	3804.385
CantonS	HS Agar 3%	3	3471.433
CantonS	HS Agar 3%	3	3369.114
CantonS	HS Agar 3%	3	4490.614
CantonS	HS Agar 3%	3	4159.266
CantonS	HY Agar 0.5%	1	5254.064
CantonS	HY Agar 0.5%	1	6143.407
CantonS	HY Agar 0.5%	1	5522.349
CantonS	HY Agar 0.5%	1	5852.713
CantonS	HY Agar 0.5%	1	5661.263
CantonS	HY Agar 0.5%	1	6545.545
CantonS	HY Agar 0.5%	1	5314.58
CantonS	HY Agar 0.5%	1	5849.334
CantonS	HY Agar 0.5%	1	6353.975
CantonS	HY Agar 0.5%	2	4129.422
CantonS	HY Agar 0.5%	2	4399.899
CantonS	HY Agar 0.5%	2	5225.035
CantonS	HY Agar 0.5%	2	5052.225
CantonS	HY Agar 0.5%	2	4933.687
CantonS	HY Agar 0.5%	2	4657.991
CantonS	HY Agar 0.5%	2	5288.475
CantonS	HY Agar 0.5%	2	4919.052
CantonS	HY Agar 0.5%	3	4947.355
CantonS	HY Agar 0.5%	3	4922.29
CantonS	HY Agar 0.5%	3	4432.427
CantonS	HY Agar 0.5%	3	5088.399
CantonS	HY Agar 0.5%	3	4412.488
CantonS	HY Agar 0.5%	3	4921.502
CantonS	HY Agar 0.5%	3	5166.043
CantonS	HY Agar 0.5%	3	4351.439
CantonS	HY Agar 1%	1	5509.968
CantonS	HY Agar 1%	1	4937.722
CantonS	HY Agar 1%	1	6217.91
CantonS	HY Agar 1%	1	6194.849
CantonS	HY Agar 1%	1	4901.611
CantonS	HY Agar 1%	1	5480.743
CantonS	HY Agar 1%	1	5668.453
CantonS	HY Agar 1%	2	5976.153
CantonS	HY Agar 1%	2	5583.079
CantonS	HY Agar 1%	2	4530.745
CantonS	HY Agar 1%	2	5120.894
CantonS	HY Agar 1%	2	5069.78
CantonS	HY Agar 1%	2	4971.244
CantonS	HY Agar 1%	3	6887.637
CantonS	HY Agar 1%	3	4918.752
CantonS	HY Agar 1%	3	4015.014
CantonS	HY Agar 1%	3	5071.464
CantonS	HY Agar 1%	3	5085.421
CantonS	HY Agar 1%	3	5765.954
CantonS	HY Agar 3%	1	5632.924
CantonS	HY Agar 3%	1	5765.59
CantonS	HY Agar 3%	1	5673.381
CantonS	HY Agar 3%	1	5478.243
CantonS	HY Agar 3%	1	5253.565
CantonS	HY Agar 3%	1	6522.039
CantonS	HY Agar 3%	1	5312.842
CantonS	HY Agar 3%	2	6881.222
CantonS	HY Agar 3%	2	5959.664
CantonS	HY Agar 3%	2	3731.731
CantonS	HY Agar 3%	2	6338.762
CantonS	HY Agar 3%	2	6324.285
CantonS	HY Agar 3%	2	5932.432
CantonS	HY Agar 3%	3	4900.123
CantonS	HY Agar 3%	3	4307.041
CantonS	HY Agar 3%	3	5027.929
CantonS	HY Agar 3%	3	4423.714
CantonS	HY Agar 3%	3	4316.699
CantonS	HY Agar 3%	3	4799.866
CantonS	HY Agar 3%	3	5102.977
CantonS	HY Agar 3%	3	5461.654
CantonS	HY Agar 3%	3	3798.721
CantonS	HS	5	3452.322
CantonS	HS	6	3470.382
CantonS	HS	5	3549.325
CantonS	HS	6	3680.504
CantonS	HS	5	3717.136
CantonS	HS	6	3733.768
CantonS	HS	4	3874.846
CantonS	HS	5	3933.625
CantonS	HS	4	3946.612
CantonS	HS	6	4021.942
CantonS	HS	5	4022.813
CantonS	HS	5	4176.935
CantonS	HS	4	4232.401
CantonS	HS	5	4275.807
CantonS	HS	6	4409.731
CantonS	HS	6	4542.209
CantonS	HS	6	4605.345
CantonS	HS	4	4743.473
CantonS	HS	4	4773.038
CantonS	HS	4	4840.523
CantonS	HS	4	4857.597
CantonS	HS	4	4863.988
CantonS	HS	6	5113.07
CantonS	HS Agar 0.5%	4	5678.358
CantonS	HS Agar 0.5%	4	3673.569
CantonS	HS Agar 0.5%	4	4389.077
CantonS	HS Agar 0.5%	4	4617.363
CantonS	HS Agar 0.5%	4	4892.517
CantonS	HS Agar 0.5%	4	4842.997
CantonS	HS Agar 0.5%	4	4844.522
CantonS	HS Agar 0.5%	5	3072.841
CantonS	HS Agar 0.5%	5	3558.403
CantonS	HS Agar 0.5%	5	3926.787
CantonS	HS Agar 0.5%	5	5199.763
CantonS	HS Agar 0.5%	5	3936.25
CantonS	HS Agar 0.5%	5	4659.046
CantonS	HS Agar 0.5%	5	4470.466
CantonS	HS Agar 0.5%	5	3579.498
CantonS	HS Agar 0.5%	6	3567.397
CantonS	HS Agar 0.5%	6	5119.455
CantonS	HS Agar 0.5%	6	5032.968
CantonS	HS Agar 0.5%	6	4379.218
CantonS	HS Agar 0.5%	6	4876.131
CantonS	HS Agar 0.5%	6	4115.774
CantonS	HS Agar 0.5%	6	4025.463
CantonS	HS Agar 0.5%	6	4952.584
CantonS	HS Agar 1%	4	2955.605
CantonS	HS Agar 1%	4	4746.105
CantonS	HS Agar 1%	4	3869.067
CantonS	HS Agar 1%	4	5102.233
CantonS	HS Agar 1%	4	4276.093
CantonS	HS Agar 1%	4	4347.194
CantonS	HS Agar 1%	4	5170.062
CantonS	HS Agar 1%	4	4389.199
CantonS	HS Agar 1%	4	4809.563
CantonS	HS Agar 1%	5	4139.96
CantonS	HS Agar 1%	5	4369.122
CantonS	HS Agar 1%	5	3645.318
CantonS	HS Agar 1%	5	4491.225
CantonS	HS Agar 1%	5	3620.408
CantonS	HS Agar 1%	5	4495.183
CantonS	HS Agar 1%	5	4244.938
CantonS	HS Agar 1%	5	4350.037
CantonS	HS Agar 1%	5	3504.158
CantonS	HS Agar 1%	6	4837.693
CantonS	HS Agar 1%	6	5070.352
CantonS	HS Agar 1%	6	5176.878
CantonS	HS Agar 1%	6	5342.156
CantonS	HS Agar 1%	6	4365.694
CantonS	HS Agar 1%	6	6168.102
CantonS	HS Agar 1%	6	5031.724
CantonS	HS Agar 1%	6	4830.455
CantonS	HS Agar 1%	6	5093.785
CantonS	HS Agar 1%	6	4473.687
CantonS	HS Agar 3%	5	4063.324
CantonS	HS Agar 3%	5	3998.842
CantonS	HS Agar 3%	5	3691.132
CantonS	HS Agar 3%	5	4152.709
CantonS	HS Agar 3%	5	4232.499
CantonS	HS Agar 3%	5	3918.477
CantonS	HS Agar 3%	5	4311.995
CantonS	HS Agar 3%	5	4024.974
CantonS	HS Agar 3%	5	3520.822
CantonS	HS Agar 3%	5	3695.564
CantonS	HS Agar 3%	6	4460.004
CantonS	HS Agar 3%	6	4219.884
CantonS	HS Agar 3%	6	3588.667
CantonS	HS Agar 3%	6	3918.677
CantonS	HS Agar 3%	6	3041.635
CantonS	HS Agar 3%	6	3932.358
CantonS	HS Agar 3%	6	4012.173
CantonS	HS Agar 3%	6	3846.914
CantonS	HS Agar 3%	6	4727.121
CantonS	HY	4	4793.953
CantonS	HY	6	4890.7
CantonS	HY	6	4915.092
CantonS	HY	6	4934.564
CantonS	HY	5	4982.848
CantonS	HY	5	5225.366
CantonS	HY	4	5269.175
CantonS	HY	4	5299.635
CantonS	HY	4	5321.213
CantonS	HY	5	5368.161
CantonS	HY	6	5391.331
CantonS	HY	5	5647.358
CantonS	HY	6	5821.907
CantonS	HY	5	5857.68
CantonS	HY	5	5884.704
CantonS	HY	5	5940.706
CantonS	HY	6	6051.66
CantonS	HY	5	6252.051
CantonS	HY	4	6460.088
CantonS	HY	6	6546.816
CantonS	HY	4	6588.968
CantonS	HY	5	6690.93
CantonS	HY Agar 0.5%	4	5943.349
CantonS	HY Agar 0.5%	4	5537.244
CantonS	HY Agar 0.5%	4	5487.442
CantonS	HY Agar 0.5%	4	6042.928
CantonS	HY Agar 0.5%	4	5812.947
CantonS	HY Agar 0.5%	4	6417.248
CantonS	HY Agar 0.5%	4	4435.064
CantonS	HY Agar 0.5%	4	6596.36
CantonS	HY Agar 0.5%	5	5365.235
CantonS	HY Agar 0.5%	5	7163.224
CantonS	HY Agar 0.5%	5	5455.714
CantonS	HY Agar 0.5%	5	5202.612
CantonS	HY Agar 0.5%	5	5417.153
CantonS	HY Agar 0.5%	5	5838.993
CantonS	HY Agar 0.5%	5	5763.828
CantonS	HY Agar 0.5%	6	5131.156
CantonS	HY Agar 0.5%	6	4527.024
CantonS	HY Agar 0.5%	6	5365.15
CantonS	HY Agar 0.5%	6	6321.656
CantonS	HY Agar 0.5%	6	5051.946
CantonS	HY Agar 0.5%	6	5419.249
CantonS	HY Agar 0.5%	6	5907.612
CantonS	HY Agar 0.5%	6	4345.532
CantonS	HY Agar 0.5%	6	3822.257
CantonS	HY Agar 1%	4	7007.017
CantonS	HY Agar 1%	4	5308.889
CantonS	HY Agar 1%	4	4621.045
CantonS	HY Agar 1%	4	5838.517
CantonS	HY Agar 1%	4	7429.449
CantonS	HY Agar 1%	4	7222.753
CantonS	HY Agar 1%	4	6789.452
CantonS	HY Agar 1%	4	5052.999
CantonS	HY Agar 1%	4	5729.814
CantonS	HY Agar 1%	5	5017.2
CantonS	HY Agar 1%	5	5171.348
CantonS	HY Agar 1%	5	4715.984
CantonS	HY Agar 1%	5	5114.473
CantonS	HY Agar 1%	5	4583.538
CantonS	HY Agar 1%	5	4746.604
CantonS	HY Agar 1%	5	5692.664
CantonS	HY Agar 1%	5	6207.182
CantonS	HY Agar 1%	6	4901.425
CantonS	HY Agar 1%	6	6560.679
CantonS	HY Agar 1%	6	6267.522
CantonS	HY Agar 1%	6	5558.639
CantonS	HY Agar 1%	6	6086.112
CantonS	HY Agar 1%	6	7233.17
CantonS	HY Agar 1%	6	6068.182
CantonS	HY Agar 1%	6	4645.103
CantonS	HY Agar 1%	6	4300.165
CantonS	HY Agar 3%	5	5440.433
CantonS	HY Agar 3%	5	4644.127
CantonS	HY Agar 3%	5	3877.075
CantonS	HY Agar 3%	5	5170.088
CantonS	HY Agar 3%	5	4927.227
CantonS	HY Agar 3%	5	4555.357
CantonS	HY Agar 3%	6	4265.93
CantonS	HY Agar 3%	6	4743.454
CantonS	HY Agar 3%	6	5844.313
CantonS	HY Agar 3%	6	4826.114
CantonS	HY Agar 3%	6	3810.548
CantonS	HY Agar 3%	6	5389.41
CantonS	HY Agar 3%	6	5037.79
CantonS	HY Agar 3%	6	5398.225
CantonS	HY Agar 3%	6	5112.919
