# Supplementary material for: Multiscale analysis reveals that diet-dependent midgut plasticity emerges from alterations in both stem cell niche coupling and enterocyte size
Source: eLife. 2021 Sep 23;10:e64125. doi: 10.7554/eLife.64125 (PMC8528489; doi:10.7554/eLife.64125)
Supplement: Figure 2—figure supplement 2—source data 3. [file elife-64125-fig2-figsupp2-data3.csv]

Line	Diet	Sugar	Day	Repeat	GutNumber	Total.L
CantonS	HS	Sucrose	5	2	1	3854.763
CantonS	HS	Sucrose	5	2	2	3698.701
CantonS	HS	Sucrose	5	2	3	2978.237
CantonS	HS	Sucrose	5	2	4	2858.032
CantonS	HS	Sucrose	5	2	5	3843.074
CantonS	HS	Sucrose	5	2	6	4085.073
CantonS	HS	Sucrose	5	3	1	4642.033
CantonS	HS	Sucrose	5	3	2	4946.549
CantonS	HS	Sucrose	5	3	3	2241.902
CantonS	HS	Sucrose	5	3	4	4671.177
CantonS	HS	Sucrose	5	3	5	4035.892
CantonS	HS	Sucrose	5	3	6	5287.408
CantonS	HS	Sucrose	5	3	7	4796.308
CantonS	HS	Sucrose	5	3	8	4320.169
CantonS	HS	Sucrose	5	3	9	4813.786
CantonS	HS	Sucrose	5	3	10	5330.393
CantonS	HS	Sucrose	5	1	1	4898.77
CantonS	HS	Sucrose	5	1	2	3658.57
CantonS	HS	Sucrose	5	1	3	3544.992
CantonS	HS	Sucrose	5	1	4	4322.46
CantonS	HS	Sucrose	5	1	5	5172.299
CantonS	HS	Sucrose	5	1	6	4717.457
CantonS	HS	Sucrose	5	1	7	4547.59
CantonS	HS	Sucrose	5	1	8	4710.316
CantonS	HS	Sucrose	5	1	9	4800.07
CantonS	HS	Sucrose	5	1	10	3074.108
CantonS	HS	Sucrose	5	1	11	4236.25
CantonS	HS	Sorbitol	5	2	1	5145.122
CantonS	HS	Sorbitol	5	2	2	2625.711
CantonS	HS	Sorbitol	5	2	3	4355.002
CantonS	HS	Sorbitol	5	2	4	4049.83
CantonS	HS	Sorbitol	5	2	5	4493.877
CantonS	HS	Sorbitol	5	2	6	4709.649
CantonS	HS	Sorbitol	5	2	7	5481.857
CantonS	HS	Sorbitol	5	3	1	4152.163
CantonS	HS	Sorbitol	5	3	2	4471.962
CantonS	HS	Sorbitol	5	3	3	3551.22
CantonS	HS	Sorbitol	5	3	4	4994.768
CantonS	HS	Sorbitol	5	3	5	5086.304
CantonS	HS	Sorbitol	5	3	6	5219.899
CantonS	HS	Sorbitol	5	3	7	4827.243
CantonS	HS	Sorbitol	5	3	8	3996.395
CantonS	HS	Sorbitol	5	3	9	4702.042
CantonS	HS	Sorbitol	5	1	1	3861.656
CantonS	HS	Sorbitol	5	1	2	3606.511
CantonS	HS	Sorbitol	5	1	3	4179.551
CantonS	HS	Sorbitol	5	1	4	4486.128
CantonS	HS	Sorbitol	5	1	5	5156.16
CantonS	HS	Sorbitol	5	1	6	3709.173
CantonS	HS	Sorbitol	5	1	7	4568.172
CantonS	HY	Sucrose	5	2	1	5266.836
CantonS	HY	Sucrose	5	2	2	4803.778
CantonS	HY	Sucrose	5	2	3	4972.687
CantonS	HY	Sucrose	5	2	4	3481.299
CantonS	HY	Sucrose	5	2	5	5502.621
CantonS	HY	Sucrose	5	2	6	6091.923
CantonS	HY	Sucrose	5	2	7	5407.22
CantonS	HY	Sucrose	5	2	8	5506.668
CantonS	HY	Sucrose	5	2	9	5453.787
CantonS	HY	Sucrose	5	2	10	4862.56
CantonS	HY	Sucrose	5	3	1	6019.657
CantonS	HY	Sucrose	5	3	2	5644.996
CantonS	HY	Sucrose	5	3	3	6079.339
CantonS	HY	Sucrose	5	3	4	5938.258
CantonS	HY	Sucrose	5	3	5	5721.503
CantonS	HY	Sucrose	5	3	6	5035.322
CantonS	HY	Sucrose	5	3	7	5916.071
CantonS	HY	Sucrose	5	3	8	5254.039
CantonS	HY	Sucrose	5	3	9	6751.979
CantonS	HY	Sucrose	5	3	10	4617.729
CantonS	HY	Sucrose	5	3	11	5267.491
CantonS	HY	Sucrose	5	3	12	4788.844
CantonS	HY	Sucrose	5	1	1	5112.821
CantonS	HY	Sucrose	5	1	2	5734.561
CantonS	HY	Sucrose	5	1	3	4576.235
CantonS	HY	Sucrose	5	1	4	4801.736
CantonS	HY	Sucrose	5	1	5	6008.573
CantonS	HY	Sucrose	5	1	6	5267.357
CantonS	HY	Sucrose	5	1	7	6508.66
CantonS	HY	Sucrose	5	1	8	6168.543
CantonS	HY	Sucrose	5	1	9	4718.658
CantonS	HY	Sucrose	5	1	10	4894.192
CantonS	HY	Arabinose	5	2	1	4624.299
CantonS	HY	Arabinose	5	2	2	3715.502
CantonS	HY	Arabinose	5	2	3	3493.821
CantonS	HY	Arabinose	5	2	4	3705.2
CantonS	HY	Arabinose	5	2	5	4764.86
CantonS	HY	Arabinose	5	2	6	3205.183
CantonS	HY	Arabinose	5	2	7	3076.469
CantonS	HY	Arabinose	5	2	8	3050.056
CantonS	HY	Arabinose	5	3	1	4924.613
CantonS	HY	Arabinose	5	3	2	4233.801
CantonS	HY	Arabinose	5	3	3	3902.211
CantonS	HY	Arabinose	5	3	4	5090.937
CantonS	HY	Arabinose	5	3	5	4537.122
CantonS	HY	Arabinose	5	3	6	4571.386
CantonS	HY	Arabinose	5	3	7	5751.404
CantonS	HY	Arabinose	5	3	8	4015.826
CantonS	HY	Arabinose	5	1	1	3703.688
CantonS	HY	Arabinose	5	1	2	4789.022
CantonS	HY	Arabinose	5	1	3	4054.304
CantonS	HY	Arabinose	5	1	4	3515.283
CantonS	HY	Arabinose	5	1	5	3964.861
CantonS	HY	Arabinose	5	1	6	4368.427
CantonS	HY	Arabinose	5	1	7	4053.453
CantonS	HY	Arabinose	5	1	8	3915.743
CantonS	HY	Sorbitol	5	2	1	5099.081
CantonS	HY	Sorbitol	5	2	2	4345.245
CantonS	HY	Sorbitol	5	2	3	5932.906
CantonS	HY	Sorbitol	5	2	4	4705.732
CantonS	HY	Sorbitol	5	2	5	5013.228
CantonS	HY	Sorbitol	5	2	6	6029.783
CantonS	HY	Sorbitol	5	2	7	6410.48
CantonS	HY	Sorbitol	5	2	8	6432.281
CantonS	HY	Sorbitol	5	2	9	5613.574
CantonS	HY	Sorbitol	5	2	10	6286.1
CantonS	HY	Sorbitol	5	2	11	5330.805
CantonS	HY	Sorbitol	5	3	1	5113.601
CantonS	HY	Sorbitol	5	3	2	5531.443
CantonS	HY	Sorbitol	5	3	3	5559.539
CantonS	HY	Sorbitol	5	3	4	6232.969
CantonS	HY	Sorbitol	5	3	5	5864.132
CantonS	HY	Sorbitol	5	3	6	4400.726
CantonS	HY	Sorbitol	5	3	7	4560.275
CantonS	HY	Sorbitol	5	3	8	5307.976
CantonS	HY	Sorbitol	5	3	9	5548.201
CantonS	HY	Sorbitol	5	3	10	5574.017
CantonS	HY	Sorbitol	5	3	11	5633.964
CantonS	HY	Sorbitol	5	1	1	5867.685
CantonS	HY	Sorbitol	5	1	2	4709.17
CantonS	HY	Sorbitol	5	1	3	4483.557
CantonS	HY	Sorbitol	5	1	4	4892.685
CantonS	HY	Sorbitol	5	1	5	4903.441
CantonS	HY	Sorbitol	5	1	6	4381.093
CantonS	HY	Sorbitol	5	1	7	5447.569
CantonS	HY	Sorbitol	5	1	8	4706.074
CantonS	HY	Sorbitol	5	1	9	5187.152
