# Supplementary material for: Multiscale analysis reveals that diet-dependent midgut plasticity emerges from alterations in both stem cell niche coupling and enterocyte size
Source: eLife. 2021 Sep 23;10:e64125. doi: 10.7554/eLife.64125 (PMC8528489; doi:10.7554/eLife.64125)
Supplement: Figure 2—source data 2. [file elife-64125-fig2-data2.csv]

Line	Food	Repeat	Total.Lmm
CantonS	S74Y0 (A)	2	3.436863
CantonS	S74Y0 (A)	3	3.529726
CantonS	S74Y0 (A)	3	3.545512
CantonS	A+AA2	3	3.546863
CantonS	S74Y0 (A)	2	3.58032
CantonS	S74Y0 (A)	3	3.580327
CantonS	S74Y0 (A)	2	3.62727
CantonS	A+AA2	1	3.658583
CantonS	S74Y0 (A)	2	3.67736
CantonS	S74Y0 (A)	2	3.698215
CantonS	A+AA	2	3.968738
CantonS	A+AA	2	4.954142
CantonS	A+AA	2	4.020754
CantonS	A+AA	2	3.601426
CantonS	A+AA	3	3.601643
CantonS	A+AA	3	3.236509
CantonS	A+AA	3	3.233379
CantonS	A+AA	3	4.274613
CantonS	A+AA	3	4.005396
CantonS	A+AA	3	4.083195
CantonS	A+AA	3	3.361664
CantonS	A+AA	3	4.097374
CantonS	A+AA	3	3.843477
CantonS	A+AA	3	3.444841
CantonS	A+C4+L4+Ch0.4	1	4.222481
CantonS	A+C4+L4+Ch0.4	1	5.215828
CantonS	A+C4+L4+Ch0.4	1	3.722376
CantonS	A+C4+L4+Ch0.4	1	4.503991
CantonS	A+C4+L4+Ch0.4	1	3.542733
CantonS	A+C4+L4+Ch0.4	1	5.214399
CantonS	A+C4+L4+Ch0.4	1	4.89756
CantonS	A+C4+L4+Ch0.4	2	4.937172
CantonS	A+C4+L4+Ch0.4	2	4.031026
CantonS	A+C4+L4+Ch0.4	2	4.181974
CantonS	A+C4+L4+Ch0.4	2	4.077888
CantonS	A+C4+L4+Ch0.4	2	3.776268
CantonS	A+C4+L4+Ch0.4	3	4.630596
CantonS	A+C4+L4+Ch0.4	3	3.814074
CantonS	A+C4+L4+Ch0.4	3	5.823086
CantonS	A+C4+L4+Ch0.4	3	5.333389
CantonS	A+C4+L4+Ch0.4	3	6.431444
CantonS	A+C4+L4+Ch0.4	3	5.342922
CantonS	A+C4+L4+Ch0.4	3	5.803309
CantonS	A+C4+L4+Ch0.4	3	4.266231
CantonS	A+C4+L4+Ch0.4	3	5.044161
CantonS	A+C4+L4+Ch0.4	3	5.491067
CantonS	A+C4+L4+Ch0.4+V2	1	4.527103
CantonS	A+C4+L4+Ch0.4+V2	1	5.258208
CantonS	A+C4+L4+Ch0.4+V2	1	5.201938
CantonS	A+C4+L4+Ch0.4+V2	1	5.835278
CantonS	A+C4+L4+Ch0.4+V2	1	6.382124
CantonS	A+C4+L4+Ch0.4+V2	1	5.082838
CantonS	A+C4+L4+Ch0.4+V2	1	5.169294
CantonS	A+C4+L4+Ch0.4+V2	2	5.218882
CantonS	A+C4+L4+Ch0.4+V2	2	5.102066
CantonS	A+C4+L4+Ch0.4+V2	2	5.446123
CantonS	A+C4+L4+Ch0.4+V2	2	4.253804
CantonS	A+C4+L4+Ch0.4+V2	2	5.069014
CantonS	A+C4+L4+Ch0.4+V2	2	5.398884
CantonS	A+C4+L4+Ch0.4+V2	2	6.230296
CantonS	A+C4+L4+Ch0.4+V2	3	4.94428
CantonS	A+C4+L4+Ch0.4+V2	3	5.639384
CantonS	A+C4+L4+Ch0.4+V2	3	5.141869
CantonS	A+C4+L4+Ch0.4+V2	3	5.363426
CantonS	A+C4+L4+Ch0.4+V2	3	6.381463
CantonS	A+C4+L4+Ch0.4+V2	3	5.167971
CantonS	A+C4+L4+Ch0.4+V2	3	4.658363
CantonS	A+C4+L4+Ch0.4+V2	3	6.159964
CantonS	A+Cas2	1	3.675712
CantonS	A+Cas2	1	3.979087
CantonS	A+Cas2	1	3.668818
CantonS	A+Cas2	1	3.666613
CantonS	A+Cas2	1	4.591524
CantonS	A+Cas2	1	5.156927
CantonS	A+Cas2	1	3.992973
CantonS	A+Cas2	1	4.2788
CantonS	A+Cas2	1	4.548886
CantonS	A+Cas2	1	4.308283
CantonS	A+Cas2	2	4.113283
CantonS	A+Cas2	2	3.519933
CantonS	A+Cas2	2	4.25775
CantonS	A+Cas2	2	4.380846
CantonS	A+Cas2	2	3.070996
CantonS	A+Cas2	2	3.053324
CantonS	A+Cas2	2	4.202635
CantonS	A+Cas2	3	4.357671
CantonS	A+Cas2	3	4.820703
CantonS	A+Cas2	3	5.237481
CantonS	A+Cas2	3	4.159914
CantonS	A+Cas2	3	3.237406
CantonS	A+Cas2	3	2.891422
CantonS	A+Cas4	1	3.779759
CantonS	A+Cas4	1	4.523907
CantonS	A+Cas4	1	4.056542
CantonS	A+Cas4	1	4.326141
CantonS	A+Cas4	1	4.190052
CantonS	A+Cas4	1	3.607798
CantonS	A+Cas4	1	3.849843
CantonS	A+Cas4	2	4.960608
CantonS	A+Cas4	2	5.086859
CantonS	A+Cas4	2	4.433476
CantonS	A+Cas4	2	4.443894
CantonS	A+Cas4	2	3.969639
CantonS	A+Cas4	2	4.786917
CantonS	A+Cas4	2	3.782423
CantonS	A+Cas4	2	4.543322
CantonS	A+Cas4	2	3.766014
CantonS	A+Cas4	3	5.377477
CantonS	A+Cas4	3	5.09232
CantonS	A+Cas4	3	4.243147
CantonS	A+Cas4	3	4.397164
CantonS	A+Cas4	3	4.027923
CantonS	A+Cas4	3	5.266043
CantonS	A+Cas4	3	3.759294
CantonS	A+Cas4	3	4.563966
CantonS	A+Ch0.4	1	3.454937
CantonS	A+Ch0.4	1	3.172475
CantonS	A+Ch0.4	1	4.141775
CantonS	A+Ch0.4	1	4.669063
CantonS	A+Ch0.4	1	3.937816
CantonS	A+Ch0.4	1	3.968439
CantonS	A+Ch0.4	1	3.719888
CantonS	A+Ch0.4	1	4.01823
CantonS	A+Ch0.4	1	3.402729
CantonS	A+Ch0.4	2	3.21497
CantonS	A+Ch0.4	2	3.075729
CantonS	A+Ch0.4	2	3.257686
CantonS	A+Ch0.4	2	4.423476
CantonS	A+Ch0.4	2	4.20321
CantonS	A+Ch0.4	2	3.577732
CantonS	A+Ch0.4	2	4.399393
CantonS	A+Ch0.4	3	3.415118
CantonS	A+Ch0.4	3	4.056108
CantonS	A+Ch0.4	3	3.94728
CantonS	A+Ch0.4	3	4.023655
CantonS	A+Ch0.4	3	3.672117
CantonS	A+Ch0.4	3	2.820603
CantonS	A+Ch0.4	3	3.355534
CantonS	A+Ch0.4	3	4.011509
CantonS	A+Ch0.4	3	4.200069
CantonS	A+Ch0.4	3	4.356754
CantonS	A+L2+Ch0.2	1	4.217141
CantonS	A+L2+Ch0.2	1	2.712446
CantonS	A+L2+Ch0.2	1	3.777039
CantonS	A+L2+Ch0.2	1	3.639209
CantonS	A+L2+Ch0.2	1	4.025916
CantonS	A+L2+Ch0.2	1	3.515405
CantonS	A+L2+Ch0.2	1	3.857641
CantonS	A+L2+Ch0.2	1	4.069086
CantonS	A+L2+Ch0.2	2	3.616937
CantonS	A+L2+Ch0.2	2	4.068469
CantonS	A+L2+Ch0.2	2	3.625525
CantonS	A+L2+Ch0.2	2	4.1489
CantonS	A+L2+Ch0.2	2	3.516636
CantonS	A+L2+Ch0.2	2	4.115776
CantonS	A+L2+Ch0.2	2	3.271331
CantonS	A+L2+Ch0.2	2	2.871248
CantonS	A+L2+Ch0.2	3	3.81698
CantonS	A+L2+Ch0.2	3	4.849186
CantonS	A+L2+Ch0.2	3	3.35079
CantonS	A+L2+Ch0.2	3	3.99598
CantonS	A+L2+Ch0.2	3	3.778382
CantonS	A+L2+Ch0.2	3	5.058659
CantonS	A+L2+Ch0.2	3	4.554572
CantonS	A+L2+Ch0.2	3	3.691033
CantonS	A+L4	2	3.177784
CantonS	A+L4	1	3.239693
CantonS	A+L4	3	3.249973
CantonS	A+L4	3	3.343299
CantonS	A+L4	1	3.380975
CantonS	A+L4	2	3.521956
CantonS	A+L4	3	3.554448
CantonS	A+L4	2	3.571843
CantonS	A+L4	3	3.57725
CantonS	A+L4	1	3.701092
CantonS	A+L4	2	3.747852
CantonS	A+L4	2	3.917446
CantonS	A+L4	2	4.001982
CantonS	A+L4	3	4.006344
CantonS	A+L4	1	4.056483
CantonS	A+L4	1	4.106628
CantonS	A+L4	3	4.161654
CantonS	A+L4	1	4.193452
CantonS	A+L4	3	4.197731
CantonS	A+L4	1	4.219594
CantonS	A+L4	2	4.276226
CantonS	A+L4	3	4.328316
CantonS	A+L4	3	4.405066
CantonS	A+L4	1	4.410468
CantonS	A+L4	3	4.740908
CantonS	A+L4+Ch0.4	1	4.329554
CantonS	A+L4+Ch0.4	1	4.749765
CantonS	A+L4+Ch0.4	1	4.157301
CantonS	A+L4+Ch0.4	1	3.946549
CantonS	A+L4+Ch0.4	1	4.118032
CantonS	A+L4+Ch0.4	1	3.864648
CantonS	A+L4+Ch0.4	1	3.934171
CantonS	A+L4+Ch0.4	1	3.090049
CantonS	A+L4+Ch0.4	1	3.983721
CantonS	A+L4+Ch0.4	2	2.631598
CantonS	A+L4+Ch0.4	2	3.980401
CantonS	A+L4+Ch0.4	2	4.670351
CantonS	A+L4+Ch0.4	2	2.694297
CantonS	A+L4+Ch0.4	2	3.063518
CantonS	A+L4+Ch0.4	2	2.767889
CantonS	A+L4+Ch0.4	2	4.193786
CantonS	A+L4+Ch0.4	2	2.923296
CantonS	A+L4+Ch0.4	3	3.875849
CantonS	A+L4+Ch0.4	3	3.442358
CantonS	A+L4+Ch0.4	3	4.331211
CantonS	A+L4+Ch0.4	3	4.041843
CantonS	A+L4+Ch0.4	3	4.384621
CantonS	A+L4+Ch0.4	3	3.048124
CantonS	A+L4+Ch0.4	3	4.956003
CantonS	A+L4+Ch0.4	3	4.194332
CantonS	A+L4+Ch0.4	3	3.41381
CantonS	A+V2	1	3.890192
CantonS	A+V2	3	3.948786
CantonS	A+V2	3	3.954852
CantonS	A+V2	2	4.024562
CantonS	A+V2	3	4.272581
CantonS	A+V2	2	4.287883
CantonS	A+V2	1	4.388191
CantonS	A+V2	1	4.417494
CantonS	A+V2	1	4.458489
CantonS	A+V2	3	4.591603
CantonS	A+V2	1	4.647856
CantonS	A+V2	3	4.670993
CantonS	A+V2	2	4.675854
CantonS	A+V2	1	4.683573
CantonS	A+V2	2	4.685858
CantonS	A+V2	2	4.731491
CantonS	A+V2	3	4.734412
CantonS	A+V2	2	4.841282
CantonS	A+V2	3	4.867899
CantonS	A+V2	1	4.958393
CantonS	A+V2	3	5.149202
CantonS	A+V2	2	5.32052
CantonS	A+V2	2	5.472191
CantonS	A+V4	1	4.700182
CantonS	A+V4	1	5.022345
CantonS	A+V4	1	5.908169
CantonS	A+V4	1	3.86297
CantonS	A+V4	1	5.224581
CantonS	A+V4	1	4.481966
CantonS	A+V4	1	5.632647
CantonS	A+V4	1	5.086083
CantonS	A+V4	1	5.080082
CantonS	A+V4	1	3.792519
CantonS	A+V4	2	4.717915
CantonS	A+V4	2	5.639822
CantonS	A+V4	2	4.333316
CantonS	A+V4	2	4.973627
CantonS	A+V4	2	3.64146
CantonS	A+V4	2	4.366747
CantonS	A+V4	2	4.429465
CantonS	A+V4	2	5.044331
CantonS	A+V4	3	4.238763
CantonS	A+V4	3	4.661048
CantonS	A+V4	3	5.449039
CantonS	A+V4	3	5.015378
CantonS	A+V4	3	4.269648
CantonS	A+V4	3	4.537473
CantonS	A+V4	3	3.975047
CantonS	HS	2	3.452322
CantonS	HS	3	3.470382
CantonS	HS	2	3.549325
CantonS	HS	3	3.680504
CantonS	HS	2	3.717136
CantonS	HS	2	3.727903
CantonS	HS	3	3.733768
CantonS	HS	2	3.859357
CantonS	HS	1	3.874846
CantonS	HS	2	3.933625
CantonS	HS	1	3.946612
CantonS	HS	3	3.979255
CantonS	HS	3	4.021942
CantonS	HS	2	4.022813
CantonS	HS	1	4.032063
CantonS	HS	2	4.083507
CantonS	HS	2	4.120552
CantonS	HS	2	4.128047
CantonS	HS	1	4.163939
CantonS	HS	2	4.176935
CantonS	HS	1	4.232401
CantonS	HS	2	4.238437
CantonS	HS	3	4.271935
CantonS	HS	2	4.275807
CantonS	HS	3	4.314223
CantonS	HS	3	4.409731
CantonS	HS	2	4.520443
CantonS	HS	3	4.524452
CantonS	HS	3	4.542209
CantonS	HS	1	4.553188
CantonS	HS	3	4.605345
CantonS	HS	3	4.725767
CantonS	HS	1	4.730033
CantonS	HS	1	4.743473
CantonS	HS	1	4.773038
CantonS	HS	1	4.808671
CantonS	HS	1	4.840523
CantonS	HS	1	4.857597
CantonS	HS	1	4.863988
CantonS	HS	1	4.869778
CantonS	HS	2	5.053004
CantonS	HS	3	5.11307
CantonS	HY	2	4.711122
CantonS	HY	1	4.793953
CantonS	HY	3	4.8907
CantonS	HY	3	4.915092
CantonS	HY	3	4.934564
CantonS	HY	2	4.982848
CantonS	HY	2	5.065637
CantonS	HY	2	5.225366
CantonS	HY	2	5.248875
CantonS	HY	1	5.269175
CantonS	HY	1	5.299635
CantonS	HY	1	5.321213
CantonS	HY	2	5.368161
CantonS	HY	3	5.391331
CantonS	HY	2	5.4068
CantonS	HY	3	5.424217
CantonS	HY	3	5.454077
CantonS	HY	2	5.460309
CantonS	HY	1	5.57743
CantonS	HY	1	5.642892
CantonS	HY	2	5.647358
CantonS	HY	1	5.701027
CantonS	HY	1	5.766591
CantonS	HY	3	5.821907
CantonS	HY	3	5.824361
CantonS	HY	1	5.828051
CantonS	HY	2	5.83721
CantonS	HY	3	5.856616
CantonS	HY	2	5.85768
CantonS	HY	2	5.884704
CantonS	HY	1	5.908774
CantonS	HY	3	5.910177
CantonS	HY	3	5.918805
CantonS	HY	2	5.940706
CantonS	HY	3	6.05166
CantonS	HY	2	6.222978
CantonS	HY	2	6.252051
CantonS	HY	3	6.37339
CantonS	HY	1	6.376486
CantonS	HY	1	6.4009
CantonS	HY	1	6.460088
CantonS	HY	2	6.480507
CantonS	HY	3	6.546816
CantonS	HY	1	6.588968
CantonS	HY	2	6.69093
CantonS	HY	3	6.754067
CantonS	HY	1	6.923413
CantonS	HY	1	7.001011
CantonS	S74Y0 (A)	2	3.75571
CantonS	A+AA2	1	3.806163
CantonS	S74Y0 (A)	1	3.833492
CantonS	A+AA2	2	3.856316
CantonS	S74Y0 (A)	2	3.955418
CantonS	S74Y0 (A)	3	4.022655
CantonS	S74Y0 (A)	3	4.101103
CantonS	S74Y0 (A)	3	4.133093
CantonS	S74Y0 (A)	3	4.133243
CantonS	S74Y0 (A)	3	4.216846
CantonS	S74Y0 (A)	2	4.261544
CantonS	S74Y0 (A)	1	4.352891
CantonS	A+AA2	3	4.401721
CantonS	S74Y0 (A)	1	4.406032
CantonS	A+AA2	2	4.460425
CantonS	S74Y0 (A)	1	4.467127
CantonS	A+AA2	2	4.514114
CantonS	A+AA2	3	4.591202
CantonS	S74Y0 (A)	1	4.684758
CantonS	S74Y0 (A)	3	4.760184
CantonS	S74Y0 (A)	2	4.767364
CantonS	S74Y0 (A)	1	4.788408
CantonS	S74Y0 (A)	3	4.788965
CantonS	A+AA2	3	5.218385
