# Supplementary material for: Multiscale analysis reveals that diet-dependent midgut plasticity emerges from alterations in both stem cell niche coupling and enterocyte size
Source: eLife. 2021 Sep 23;10:e64125. doi: 10.7554/eLife.64125 (PMC8528489; doi:10.7554/eLife.64125)
Supplement: Figure 2—source data 3. [file elife-64125-fig2-data3.csv]

Diet	Component	Calories contributed
HS	Proteins	26.139915
HS	Carbohydrates	661.55328
HS	Lipids	8.55096
S74Y0 (A)	Proteins	0
S74Y0 (A)	Carbohydrates	286.767
S74Y0 (A)	Lipids	0
A+Cas2	Proteins	348.3
A+Cas2	Carbohydrates	286.767
A+Cas2	Lipids	0
A+Cas4	Proteins	696.6
A+Cas4	Carbohydrates	286.767
A+Cas4	Lipids	0
A+AA	Proteins	363.78
A+AA	Carbohydrates	286.767
A+AA	Lipids	0
A+AA2	Proteins	727.56
A+AA2	Carbohydrates	286.767
A+AA2	Lipids	0
A+L4	Proteins	0
A+L4	Carbohydrates	286.767
A+L4	Lipids	360.8
A+Ch0.4	Proteins	0
A+Ch0.4	Carbohydrates	286.767
A+Ch0.4	Lipids	0
A+L2+Ch0.2	Proteins	0
A+L2+Ch0.2	Carbohydrates	286.767
A+L2+Ch0.2	Lipids	180.4
A+L4+Ch0.4	Proteins	0
A+L4+Ch0.4	Carbohydrates	286.767
A+L4+Ch0.4	Lipids	360.8
A+V2	Proteins	0
A+V2	Carbohydrates	286.767
A+V2	Lipids	0
A+V4	Proteins	0
A+V4	Carbohydrates	286.767
A+V4	Lipids	0
A+C4+L4+Ch0.4	Proteins	696.6
A+C4+L4+Ch0.4	Carbohydrates	286.767
A+C4+L4+Ch0.4	Lipids	360.8
A+C4+L4+Ch0.4+V2	Proteins	696.6
A+C4+L4+Ch0.4+V2	Carbohydrates	286.767
A+C4+L4+Ch0.4+V2	Lipids	360.8
HY	Proteins	233.60481
HY	Carbohydrates	385.12692
HY	Lipids	76.41744
