# Supplementary material for: Multiscale analysis reveals that diet-dependent midgut plasticity emerges from alterations in both stem cell niche coupling and enterocyte size
Source: eLife. 2021 Sep 23;10:e64125. doi: 10.7554/eLife.64125 (PMC8528489; doi:10.7554/eLife.64125)
Supplement: Figure 2—source data 4. [file elife-64125-fig2-data4.csv]

Line	Food	Repeat	Total.L
CantonS	HS	1	4933.831
CantonS	HS	1	5315.289
CantonS	HS	1	5202.292
CantonS	HS	1	5515.131
CantonS	HS	1	4537.357
CantonS	HS	1	5348.643
CantonS	HS	1	4763.004
CantonS	HS	1	5107.994
CantonS	HS	1	5035.849
CantonS	HS	2	5446.578
CantonS	HS	2	4946.125
CantonS	HS	2	4750.523
CantonS	HS	2	4952.274
CantonS	HS	2	5021.682
CantonS	HS	2	4306.397
CantonS	HS	2	4461.174
CantonS	HS	3	4456.975
CantonS	HS	3	5253.26
CantonS	HS	3	5431.239
CantonS	HS	3	4922.426
CantonS	HS	3	4236.881
CantonS	HS	3	4692.387
CantonS	HS	3	4487.209
CantonS	HS	3	4742.672
CantonS	HY	1	6175.243
CantonS	HY	1	6731.377
CantonS	HY	1	6793.504
CantonS	HY	1	6421.037
CantonS	HY	1	7579.775
CantonS	HY	1	7112.565
CantonS	HY	1	4975.253
CantonS	HY	2	6739.236
CantonS	HY	2	7779.025
CantonS	HY	2	7071.391
CantonS	HY	2	6485.011
CantonS	HY	2	6176.002
CantonS	HY	2	7507.474
CantonS	HY	2	7167.601
CantonS	HY	3	5815.884
CantonS	HY	3	5840.681
CantonS	HY	3	6937.5
CantonS	HY	3	5979.997
CantonS	HY	3	6130.813
CantonS	HY	3	5370.453
CantonS	HY	3	6735.917
CantonS	HY	3	6670.181
CantonS	Lard Only	1	4926.025
CantonS	Lard Only	1	4975.241
CantonS	Lard Only	1	4240.637
CantonS	Lard Only	1	4802.636
CantonS	Lard Only	1	5200.966
CantonS	Lard Only	1	4516.452
CantonS	Lard Only	2	3578.007
CantonS	Lard Only	2	4703.331
CantonS	Lard Only	2	3715.706
CantonS	Lard Only	2	4928.395
CantonS	Lard Only	2	4235.694
CantonS	Lard Only	2	4176.77
CantonS	Lard Only	2	3696.718
CantonS	Lard Only	2	3196.885
CantonS	Lard Only	3	4701.223
CantonS	Lard Only	3	5759.858
CantonS	Lard Only	3	5200.14
CantonS	Lard Only	3	4549.335
CantonS	Lard Only	3	4478.441
CantonS	Lard Only	3	4104.736
CantonS	Lard Only	3	4713.044
CantonS	Lard Only	3	4432.104
CantonS	Lard Only	3	3979.769
CantonS	HS Lard sub	1	7331.755
CantonS	HS Lard sub	1	5419.345
CantonS	HS Lard sub	1	7330.402
CantonS	HS Lard sub	1	5778.418
CantonS	HS Lard sub	1	5199.958
CantonS	HS Lard sub	1	7370.905
CantonS	HS Lard sub	2	7569.945
CantonS	HS Lard sub	2	6731.328
CantonS	HS Lard sub	2	5959.544
CantonS	HS Lard sub	2	6714.132
CantonS	HS Lard sub	2	5976.735
CantonS	HS Lard sub	2	5886.026
CantonS	HS Lard sub	2	6181.804
CantonS	HS Lard sub	3	5293.618
CantonS	HS Lard sub	3	6325.329
CantonS	HS Lard sub	3	5130.661
CantonS	HS Lard sub	3	5378.247
CantonS	HS Lard sub	3	5229.715
CantonS	HS Lard sub	3	5776.454
CantonS	HS Lard sub	3	5873.988
CantonS	HS Lard sub	3	7216.656
CantonS	HY Lard sub	1	5966.504
CantonS	HY Lard sub	1	5711.198
CantonS	HY Lard sub	1	5869.662
CantonS	HY Lard sub	1	5761.75
CantonS	HY Lard sub	1	4938.236
CantonS	HY Lard sub	1	6985.119
CantonS	HY Lard sub	1	5816.502
CantonS	HY Lard sub	1	7434.2
CantonS	HY Lard sub	1	6639.789
CantonS	HY Lard sub	2	7155.023
CantonS	HY Lard sub	2	5828.329
CantonS	HY Lard sub	2	6690.398
CantonS	HY Lard sub	2	6292.468
CantonS	HY Lard sub	2	5624.611
CantonS	HY Lard sub	2	4833.034
CantonS	HY Lard sub	2	6305.988
CantonS	HY Lard sub	2	6528.65
CantonS	HY Lard sub	3	7207.674
CantonS	HY Lard sub	3	6224.269
CantonS	HY Lard sub	3	6641.269
CantonS	HY Lard sub	3	6096.382
CantonS	HY Lard sub	3	6114.51
CantonS	HY Lard sub	3	6685.569
CantonS	HY Lard sub	3	4410.491
CantonS	HY Lard sub	3	6040.891
