# Supplementary material for: Multiscale analysis reveals that diet-dependent midgut plasticity emerges from alterations in both stem cell niche coupling and enterocyte size
Source: eLife. 2021 Sep 23;10:e64125. doi: 10.7554/eLife.64125 (PMC8528489; doi:10.7554/eLife.64125)
Supplement: Figure 2—source data 5. [file elife-64125-fig2-data5.csv]

Diet	Component	Calories contributed
HS	Proteins	26.139915
HS	Carbohydrates	661.55328
HS	Lipids	8.55096
Lard Only	Proteins	0
Lard Only	Carbohydrates	0
Lard Only	Lipids	680.5619317
HS Lard	Proteins	26.139915
HS Lard	Carbohydrates	11.00628
HS Lard	Lipids	644.2967823
HY Lard	Proteins	233.60481
HY Lard	Carbohydrates	98.35992
HY Lard	Lipids	356.659947
HY	Proteins	233.60481
HY	Carbohydrates	385.12692
HY	Lipids	76.41744
