# Supplementary material for: Multiscale analysis reveals that diet-dependent midgut plasticity emerges from alterations in both stem cell niche coupling and enterocyte size
Source: eLife. 2021 Sep 23;10:e64125. doi: 10.7554/eLife.64125 (PMC8528489; doi:10.7554/eLife.64125)
Supplement: Figure 2—source data 6. [file elife-64125-fig2-data6.csv]

Line	Diet	Sugar	Day	Repeat	Total.L
CantonS	HS	Fructose	5	1	4301.984
CantonS	HS	Fructose	5	1	4313.079
CantonS	HS	Fructose	5	1	4263.185
CantonS	HS	Fructose	5	1	4520.293
CantonS	HS	Fructose	5	1	5008.11
CantonS	HS	Fructose	5	1	4269.036
CantonS	HS	Fructose	5	1	5014.152
CantonS	HS	Fructose	5	1	5023.399
CantonS	HS	Glucose	5	1	3910.552
CantonS	HS	Glucose	5	1	4916.41
CantonS	HS	Glucose	5	1	4228.303
CantonS	HS	Glucose	5	1	5182.904
CantonS	HS	Glucose	5	1	4299.7
CantonS	HS	Glucose	5	1	4964.439
CantonS	HS	Glucose	5	1	4447.323
CantonS	HS	Maltose	5	1	5064.357
CantonS	HS	Maltose	5	1	4220.69
CantonS	HS	Maltose	5	1	4477.315
CantonS	HS	Maltose	5	1	4919.363
CantonS	HS	Maltose	5	1	4770.31
CantonS	HS	Maltose	5	1	4593.933
CantonS	HS	Sucrose	5	1	5623.236
CantonS	HS	Sucrose	5	1	5204.59
CantonS	HS	Sucrose	5	1	4967.496
CantonS	HS	Sucrose	5	1	5043.333
CantonS	HS	Sucrose	5	1	3779.52
CantonS	HS	Sucrose	5	1	4656.471
CantonS	HS	Sucrose	5	1	4713.931
CantonS	HS	Sucrose	5	1	5006.56
CantonS	HS	Sucrose	5	1	5321.592
CantonS	HY	Fructose	5	1	4698.988
CantonS	HY	Fructose	5	1	6020.592
CantonS	HY	Fructose	5	1	6527.334
CantonS	HY	Fructose	5	1	6757.191
CantonS	HY	Fructose	5	1	6043.053
CantonS	HY	Fructose	5	1	6139.05
CantonS	HY	Fructose	5	1	7634.735
CantonS	HY	Glucose	5	1	6088.311
CantonS	HY	Glucose	5	1	6501.346
CantonS	HY	Glucose	5	1	7764.483
CantonS	HY	Glucose	5	1	6578.589
CantonS	HY	Glucose	5	1	6044.821
CantonS	HY	Glucose	5	1	6166.372
CantonS	HY	Glucose	5	1	6807.529
CantonS	HY	Glucose	5	1	5787.678
CantonS	HY	Maltose	5	1	6475.191
CantonS	HY	Maltose	5	1	6721.454
CantonS	HY	Maltose	5	1	6328.052
CantonS	HY	Maltose	5	1	6270.316
CantonS	HY	Maltose	5	1	6369.349
CantonS	HY	Maltose	5	1	5806.386
CantonS	HY	Maltose	5	1	6348.706
CantonS	HY	Maltose	5	1	5218.513
CantonS	HY	Maltose	5	1	6875.907
CantonS	HY	Sucrose	5	1	6319.32
CantonS	HY	Sucrose	5	1	5336.207
CantonS	HY	Sucrose	5	1	7784.974
CantonS	HY	Sucrose	5	1	7375.311
CantonS	HY	Sucrose	5	1	6062.962
CantonS	HY	Sucrose	5	1	7156.2
CantonS	HY	Sucrose	5	1	6867.319
CantonS	HY	Sucrose	5	1	6092.722
CantonS	HY	Sucrose	5	1	8045.813
CantonS	HY	Sucrose	5	1	6728.672
CantonS	HY	Sucrose	5	1	6679.28
CantonS	HS	Fructose	5	2	3767.031
CantonS	HS	Fructose	5	2	4885.975
CantonS	HS	Fructose	5	2	4245.709
CantonS	HS	Fructose	5	2	5161.92
CantonS	HS	Fructose	5	2	5637.967
CantonS	HS	Fructose	5	2	3790.302
CantonS	HS	Fructose	5	2	5009.481
CantonS	HS	Fructose	5	2	5533.402
CantonS	HS	Fructose	5	2	4831.311
CantonS	HS	Fructose	5	2	4269.015
CantonS	HS	Glucose	5	2	5464.969
CantonS	HS	Glucose	5	2	4750.75
CantonS	HS	Glucose	5	2	4086.858
CantonS	HS	Glucose	5	2	4835.498
CantonS	HS	Glucose	5	2	4174.222
CantonS	HS	Glucose	5	2	5366.223
CantonS	HS	Maltose	5	2	5453.023
CantonS	HS	Maltose	5	2	4745.752
CantonS	HS	Maltose	5	2	5183.39
CantonS	HS	Maltose	5	2	4506.101
CantonS	HS	Maltose	5	2	5362.92
CantonS	HS	Maltose	5	2	4765.304
CantonS	HS	Maltose	5	2	4928.599
CantonS	HS	Sucrose	5	2	5978.695
CantonS	HS	Sucrose	5	2	3809.439
CantonS	HS	Sucrose	5	2	4850.9
CantonS	HS	Sucrose	5	2	4564.743
CantonS	HS	Sucrose	5	2	5125.884
CantonS	HS	Sucrose	5	2	4476.577
CantonS	HS	Sucrose	5	2	5424.372
CantonS	HS	Sucrose	5	2	4682.877
CantonS	HY	Fructose	5	2	4748.458
CantonS	HY	Fructose	5	2	5818.676
CantonS	HY	Fructose	5	2	6226.523
CantonS	HY	Fructose	5	2	6897.154
CantonS	HY	Fructose	5	2	4994.731
CantonS	HY	Fructose	5	2	5498.827
CantonS	HY	Glucose	5	2	6331.806
CantonS	HY	Glucose	5	2	5933.898
CantonS	HY	Glucose	5	2	5000.08
CantonS	HY	Glucose	5	2	6227.318
CantonS	HY	Glucose	5	2	5945.135
CantonS	HY	Glucose	5	2	5308.928
CantonS	HY	Glucose	5	2	6362.866
CantonS	HY	Maltose	5	2	4719.35
CantonS	HY	Maltose	5	2	6884.007
CantonS	HY	Maltose	5	2	7415.738
CantonS	HY	Maltose	5	2	6987.805
CantonS	HY	Maltose	5	2	4763.481
CantonS	HY	Sucrose	5	2	7419.319
CantonS	HY	Sucrose	5	2	5722.508
CantonS	HY	Sucrose	5	2	6428.707
CantonS	HY	Sucrose	5	2	6496.496
CantonS	HY	Sucrose	5	2	7515.389
CantonS	HY	Sucrose	5	2	5872.181
CantonS	HY	Sucrose	5	2	7060.019
CantonS	HY	Sucrose	5	2	5850.528
