# Supplementary material for: Multiscale analysis reveals that diet-dependent midgut plasticity emerges from alterations in both stem cell niche coupling and enterocyte size
Source: eLife. 2021 Sep 23;10:e64125. doi: 10.7554/eLife.64125 (PMC8528489; doi:10.7554/eLife.64125)
Supplement: Figure 3—figure supplement 1—source data 2. [file elife-64125-fig3-figsupp1-data2.csv]

Diet	Repeat	Ploidy	Percentage
HS	1	2	13.08
HS	2	2	13.6
HS	3	2	11.7
HS	4	2	11.79
HS	5	2	9.09
HS	6	2	11.82
HS	7	2	6.36
HS	1	4	16.37
HS	2	4	17.69
HS	3	4	14.54
HS	4	4	16.99
HS	5	4	11.9
HS	6	4	18.62
HS	7	4	14.53
HS	1	8	14.94
HS	2	8	12.57
HS	3	8	12.37
HS	4	8	11.66
HS	5	8	11.01
HS	6	8	15.63
HS	7	8	15.72
HS	1	16	16.08
HS	2	16	17.19
HS	3	16	17.3
HS	4	16	17.91
HS	5	16	20.86
HS	6	16	18.99
HS	7	16	22.3
HS	1	32	16.94
HS	2	32	19
HS	3	32	20.05
HS	4	32	22.95
HS	5	32	27.19
HS	6	32	19.93
HS	7	32	24.23
HS	1	64	4.12
HS	2	64	3.01
HS	3	64	5.47
HS	4	64	4.58
HS	5	64	6.11
HS	6	64	3.06
HS	7	64	6
HS	1	64+	0.72
HS	2	64+	0.44
HS	3	64+	1.18
HS	4	64+	0.26
HS	5	64+	0.88
HS	6	64+	0.21
HS	7	64+	0.78
HY	1	2	14.14
HY	2	2	11.34
HY	3	2	11.84
HY	4	2	14.47
HY	5	2	10.71
HY	6	2	12.3
HY	7	2	9.08
HY	1	4	18.19
HY	2	4	21.58
HY	3	4	19.39
HY	4	4	19.5
HY	5	4	16.28
HY	6	4	19.18
HY	7	4	16.86
HY	1	8	15.86
HY	2	8	14.5
HY	3	8	13.55
HY	4	8	14.03
HY	5	8	14.33
HY	6	8	15.12
HY	7	8	15.25
HY	1	16	13.72
HY	2	16	15.07
HY	3	16	14.64
HY	4	16	12.67
HY	5	16	15.1
HY	6	16	16.08
HY	7	16	17.89
HY	1	32	14.43
HY	2	32	21.08
HY	3	32	21.16
HY	4	32	17.56
HY	5	32	23.94
HY	6	32	24.94
HY	7	32	26.07
HY	1	64	3.72
HY	2	64	2.13
HY	3	64	3.44
HY	4	64	3.17
HY	5	64	4.69
HY	6	64	2.16
HY	7	64	5.57
HY	1	64+	0.52
HY	2	64+	0.18
HY	3	64+	0.3
HY	4	64+	0.26
HY	5	64+	0.63
HY	6	64+	0.15
HY	7	64+	0.82
