# Supplementary material for: Multiscale analysis reveals that diet-dependent midgut plasticity emerges from alterations in both stem cell niche coupling and enterocyte size
Source: eLife. 2021 Sep 23;10:e64125. doi: 10.7554/eLife.64125 (PMC8528489; doi:10.7554/eLife.64125)
Supplement: Figure 3—source data 1. [file elife-64125-fig3-data1.csv]

Diet	Line	Day	Repeat	GutNumber	Region	EB	ESG	ISC	PROESG	PROESGEB	EE	DAPI	AREA	AreaReal	EB.A	ESG.A	ISC.A	EE.A	EC.A	EB.AL	ESG.AL	ISC.AL	EE.AL	EC.AL	EB.ALm	ESG.ALm	ISC.ALm	EE.ALm	EC.ALm
HS	EsgTsXGBE-lacZ	5	1	1	4	82	249	167	10	8	80	461	64309.268	205776.554	0.001275088	0.003871915	0.002596826	0.001243989	0.007168485	262.3832918	796.749264	534.3659722	255.9836993	1475.106067	0.262383292	0.796749264	0.534365972	0.255983699	1.475106067
HS	EsgTsXGBE-lacZ	5	1	2	4	33	145	112	4	2	47	443	79964.4922	245437.643	0.000412683	0.001813305	0.001400622	0.000587761	0.005539959	101.2879842	445.0532637	343.7652796	144.2586441	1359.714454	0.101287984	0.445053264	0.34376528	0.144258644	1.359714454
HS	EsgTsXGBE-lacZ	5	1	3	4	33	77	44	5	2	19	214	47084.9137	301375.789	0.000700861	0.001635343	0.000934482	0.000403526	0.00454498	211.2226668	492.8528892	281.6302224	121.6130506	1369.746991	0.211222667	0.492852889	0.281630222	0.121613051	1.369746991
HS	EsgTsXGBE-lacZ	5	1	4	4	41	127	86	2	0	62	406	81779.0938	305841.186	0.000501351	0.001552964	0.001051614	0.00075814	0.004964594	153.3336705	474.9603941	321.6267236	231.8704286	1518.377323	0.153333671	0.474960394	0.321626724	0.231870429	1.518377323
HS	EsgTsXGBE-lacZ	5	1	5	4	20	160	140	12	2				183661.812
HS	EsgTsXGBE-lacZ	5	1	6	4	17	131	114	14	3	71	484	73380.0781	320949.875	0.000231671	0.001785226	0.001553555	0.000967565	0.006595796	74.35462071	572.9679596	498.6133389	310.5398865	2116.91979	0.074354621	0.57296796	0.498613339	0.310539887	2.11691979
HS	EsgTsXGBE-lacZ	5	1	7	4	14	49	35	0	1	27	152	48807.5898	346318.988	0.000286841	0.001003942	0.000717102	0.000553193	0.00311427	99.33835807	347.6842532	248.3458952	191.5811191	1078.530745	0.099338358	0.347684253	0.248345895	0.191581119	1.078530745
HS	EsgTsXGBE-lacZ	5	1	8	4	48	185	137	7	5	34	334	78222.0748	175927.478	0.000613638	0.002365061	0.001751424	0.00043466	0.004269894	107.9557013	416.0792655	308.1235642	76.46862177	751.191755	0.107955701	0.416079266	0.308123564	0.076468622	0.751191755
HY	EsgTsXGBE-lacZ	5	1	1	4	41	265	224	14	3	48	321	131057.281	598244.566	0.00031284	0.002022017	0.001709176	0.000366252	0.002449311	187.1550136	1209.660454	1022.50544	219.1083086	1465.286814	0.187155014	1.209660454	1.02250544	0.219108309	1.465286814
HY	EsgTsXGBE-lacZ	5	1	2	4	53	192	139	6	1	20	393	114650.695	676820.776	0.000462274	0.001674652	0.001212378	0.000174443	0.003427803	312.8764385	1133.439174	820.562735	118.0665806	2320.008308	0.312876439	1.133439174	0.820562735	0.118066581	2.320008308
HY	EsgTsXGBE-lacZ	5	1	3	4	30	136	106	0	0	31	250	78449.3985	309894.584	0.000382412	0.001733602	0.001351189	0.000395159	0.003186768	118.5074417	537.2337358	418.726294	122.4576898	987.5620143	0.118507442	0.537233736	0.418726294	0.12245769	0.987562014
HY	EsgTsXGBE-lacZ	5	1	4	4	25	180	155	17	5	68	501	106443.711	393328.422	0.000234866	0.001691035	0.001456169	0.000638835	0.004706713	92.37944128	665.1319772	572.7525359	251.2720803	1851.284003	0.092379441	0.665131977	0.572752536	0.25127208	1.851284003
HY	EsgTsXGBE-lacZ	5	1	5	4	74	222	148	26	12	72	500	109400.312	379611.788	0.000676415	0.002029245	0.00135283	0.000658133	0.004570371	256.7750658	770.3251974	513.5501316	249.8351992	1734.966661	0.256775066	0.770325197	0.513550132	0.249835199	1.734966661
HY	EsgTsXGBE-lacZ	5	1	6	4	49	274	225	15	4	64	429	100732.102	417286.753	0.000486439	0.002720086	0.002233647	0.000635349	0.004258821	202.9844557	1135.055936	932.0714803	265.1225544	1777.149622	0.202984456	1.135055936	0.93207148	0.265122554	1.777149622
HY	EsgTsXGBE-lacZ	5	1	7	4	30	143	113	0	0	46	464	125125.328	229744.249	0.00023976	0.001142854	0.000903095	0.000367631	0.003708282	55.08339183	262.5641677	207.4807759	84.46120081	851.9564603	0.055083392	0.262564168	0.207480776	0.084461201	0.85195646
HY	EsgTsXGBE-lacZ	5	1	8	4	21	162	141	3	1	38	295	105617.57	364530.15	0.000198831	0.001533836	0.001335005	0.000359789	0.002793096	72.47973183	559.1293598	486.649628	131.1538005	1018.167661	0.072479732	0.55912936	0.486649628	0.1311538	1.018167661
HY	EsgTsXGBE-lacZ	5	1	9	4									566575.83
HY	EsgTsXGBE-lacZ	5	1	10	4									693250.772
HS	EsgTsXGBE-lacZ	5	2	2	4	20	136	116	3	0	40	544	124528.508	545811.527	0.000160606	0.001092119	0.000931514	0.000321212	0.004368478	87.66049409	596.0913598	508.4308657	175.3209882	2384.365439	0.087660494	0.59609136	0.508430866	0.175320988	2.384365439
HS	EsgTsXGBE-lacZ	5	2	3	4	186	188	200	5	0	46	714	125829.039	383397.804	0.001478196	0.001494091	0.001589458	0.000365575	0.005674366	566.7371547	572.8311026	609.39479	140.1608017	2175.5394	0.566737155	0.572831103	0.60939479	0.140160802	2.1755394
HS	EsgTsXGBE-lacZ	5	2	4	4	103	203	100	4	0	87	732	120293.109	475022.711	0.000856242	0.001687545	0.000831303	0.000723233	0.006085137	406.7343478	801.6220641	394.8877163	343.5523132	2890.578083	0.406734348	0.801622064	0.394887716	0.343552313	2.890578083
HS	EsgTsXGBE-lacZ	5	2	5	4									262159.992
HS	EsgTsXGBE-lacZ	5	2	6	4	163	191	28	10	0	48	679	121587.453	518950.48	0.001340599	0.001570886	0.000230287	0.000394778	0.005584458	695.7044181	815.2119255	119.5075074	204.8700127	2898.057055	0.695704418	0.815211926	0.119507507	0.204870013	2.898057055
HS	EsgTsXGBE-lacZ	5	2	7	4	63	177	114	5	0	77	784	170870.625	427502.441	0.0003687	0.001035871	0.000667171	0.000450633	0.004588267	157.6201514	442.8375682	285.2174168	192.6468517	1961.495217	0.157620151	0.442837568	0.285217417	0.192646852	1.961495217
HS	EsgTsXGBE-lacZ	5	2	8	4	29	166	137	5	0	78	637	118197.742	505410.714	0.000245352	0.001404426	0.001159075	0.000659911	0.005389274	124.0033055	709.8120244	585.8087189	333.5261319	2723.796744	0.124003305	0.709812024	0.585808719	0.333526132	2.723796744
HS	EsgTsXGBE-lacZ	5	2	9	4									183031.33
HS	EsgTsXGBE-lacZ	5	2	10	4	82	145	63	3	0	50	377	83304.1562	376218.004	0.000984345	0.001740609	0.000756265	0.00060021	0.004525585	370.3281773	654.8486062	284.5204289	225.8098642	1702.606376	0.370328177	0.654848606	0.284520429	0.225809864	1.702606376
HY	EsgTsXGBE-lacZ	5	2	1	4	13	200	187	1	0	53	617	151486.5	1167922.868	8.58E-05	0.00132025	0.001234433	0.000349866	0.00407297	100.2267349	1541.949768	1441.723034	408.6166886	4756.915036	0.100226735	1.541949768	1.441723034	0.408616689	4.756915036
HY	EsgTsXGBE-lacZ	5	2	2	4	36	221	185	0	0	23	512	126118.57	713126.574	0.000285446	0.001752319	0.001466874	0.000182368	0.004059672	203.5588943	1249.625435	1046.06654	130.0515158	2895.059831	0.203558894	1.249625435	1.04606654	0.130051516	2.895059831
HY	EsgTsXGBE-lacZ	5	2	3	4	14	136	122	0	0	13	561	161575.875	1219683.809	8.66E-05	0.00084171	0.000755063	8.05E-05	0.003472053	105.6814535	1026.619834	920.9383808	98.13277828	4234.806817	0.105681454	1.026619834	0.920938381	0.098132778	4.234806817
HS	EsgTsXGBE-lacZ	5	3	1	4
HS	EsgTsXGBE-lacZ	5	3	2	4	21	126	105	6	0	42	404	84493.4141	480389.094	0.00024854	0.00149124	0.0012427	0.00049708	0.004781438	119.3959444	716.3756665	596.9797221	238.7918888	2296.95055	0.119395944	0.716375667	0.596979722	0.238791889	2.29695055
HS	EsgTsXGBE-lacZ	5	3	3	4	17	128	111	7	3	45	518	91761.9922	394144.096	0.000185262	0.001394913	0.001209651	0.000490399	0.005645039	73.01987971	549.7967413	476.7768616	193.2879169	2224.958688	0.07301988	0.549796741	0.476776862	0.193287917	2.224958688
HS	EsgTsXGBE-lacZ	5	3	4	4				8	0	39	513	105437.5	470797.646				0.000369887	0.004865442				174.142105	2290.638458				0.174142105	2.290638458
HS	EsgTsXGBE-lacZ	5	3	5	4									371437.366
HS	EsgTsXGBE-lacZ	5	3	6	4									64028.297
HY	EsgTsXGBE-lacZ	5	3	1	4	97	500	403	16	3	205	827	122503.93	664613.762	0.000791811	0.004081502	0.00328969	0.001673416	0.006750804	526.2487082	2712.622207	2186.373499	1112.175105	4486.677131	0.526248708	2.712622207	2.186373499	1.112175105	4.486677131
HY	EsgTsXGBE-lacZ	5	3	2	4	113	453	340	28	8	173	929	122870.039	538182.274	0.000919671	0.003686822	0.002767151	0.001407992	0.007560834	494.9505791	1984.18241	1489.231831	757.7561964	4069.106974	0.494950579	1.98418241	1.489231831	0.757756196	4.069106974
HY	EsgTsXGBE-lacZ	5	3	3	4	34	144	110	1	0	30	409	124257.906	1021279.529	0.000273624	0.00115888	0.000885256	0.000241433	0.003291541	279.4470397	1183.540403	904.0933636	246.5709173	3361.583506	0.27944704	1.183540403	0.904093364	0.246570917	3.361583506
HY	EsgTsXGBE-lacZ	5	3	4	4	55	229	174	6	1	55	741	135996.984	605377.548	0.000404421	0.001683861	0.00127944	0.000404421	0.00544865	244.8272319	1019.371566	774.5443337	244.8272319	3298.490524	0.244827232	1.019371566	0.774544334	0.244827232	3.298490524
HY	EsgTsXGBE-lacZ	5	3	5	4	101	410	309	17	5	132	829	134965.453	593999.734	0.00074834	0.003037814	0.002289475	0.000978028	0.006142313	444.5135537	1804.46096	1359.947407	580.9484068	3648.532039	0.444513554	1.80446096	1.359947407	0.580948407	3.648532039
HY	EsgTsXGBE-lacZ	5	3	6	4	91	350	259	14	6	101	788	129159.328	482454.288	0.000704556	0.002709831	0.002005275	0.00078198	0.006100992	339.9161399	1307.369769	967.453629	377.2695619	2943.449651	0.33991614	1.307369769	0.967453629	0.377269562	2.943449651
HY	EsgTsXGBE-lacZ	5	3	7	4	26	216	190	15	7	135	914	148161.391	737603.024	0.000175484	0.00145787	0.001282385	0.000911169	0.006168949	129.4377604	1075.329086	945.8913258	672.0806788	4550.235114	0.12943776	1.075329086	0.945891326	0.672080679	4.550235114
HY	EsgTsXGBE-lacZ	5	3	8	4	13	173	160	6	3	91	756	145940.406	899116.801	8.91E-05	0.001185415	0.001096338	0.000623542	0.005180197	80.0910367	1065.826873	985.7358363	560.6372569	4657.601827	0.080091037	1.065826873	0.985735836	0.560637257	4.657601827
HY	EsgTsXGBE-lacZ	5	3	9	4	30	254	224	7	0	110	734	135374.828	897971.321	0.000221607	0.001876272	0.001654665	0.000812559	0.005421983	198.9966675	1684.838451	1485.841784	729.6544474	4868.785131	0.198996667	1.684838451	1.485841784	0.729654447	4.868785131
HY	EsgTsXGBE-lacZ	5	3	10	4	56	333	277	16	3	94	913	137584.656	841566.035	0.000407022	0.002420328	0.002013306	0.000683216	0.006635914	342.5360017	2036.865867	1694.329865	574.9711457	5584.56017	0.342536002	2.036865867	1.694329865	0.574971146	5.58456017
HS	EsgTsXGBE-lacZ	5	4	1	4	123	603	480	23	1	98	914	120985.047	240187.784	0.001016655	0.004984087	0.003967432	0.000810017	0.007554653	244.1880064	1197.116812	952.9288055	194.5562978	1814.535267	0.244188006	1.197116812	0.952928805	0.194556298	1.814535267
HS	EsgTsXGBE-lacZ	5	4	2	4	183	336	153	12	0	79	682	115571.555	292910.054	0.001583435	0.00290729	0.001323855	0.000683559	0.005901106	463.8039168	851.5744047	387.7704878	200.221363	1728.493286	0.463803917	0.851574405	0.387770488	0.200221363	1.728493286
HS	EsgTsXGBE-lacZ	5	4	3	4	55	450	395	3	0	26	840	99425.9922	143783.28	0.000553175	0.004525979	0.003972804	0.000261501	0.008448495	79.53735462	650.7601742	571.2228195	37.59947673	1214.752325	0.079537355	0.650760174	0.57122282	0.037599477	1.214752325
HS	EsgTsXGBE-lacZ	5	4	4	4	104	249	145	8	0	67	856	104938.789	308480.681	0.000991054	0.002372812	0.001381758	0.000638467	0.008157136	305.7209934	731.9666093	426.2456159	196.9548708	2516.318946	0.305720993	0.731966609	0.426245616	0.196954871	2.516318946
HS	EsgTsXGBE-lacZ	5	4	5	4	283	665	382	18	0	130	816	102851	348143.85	0.002751553	0.006465664	0.003714111	0.001263964	0.007933807	957.9363307	2250.98113	1293.0448	440.041424	2762.106169	0.957936331	2.25098113	1.2930448	0.440041424	2.762106169
HS	EsgTsXGBE-lacZ	5	4	6	4	127	461	334	8	0	41	708	112694.312	302497.34	0.001126942	0.004090712	0.00296377	0.000363816	0.006282482	340.8970825	1237.429567	896.5324848	110.0533889	1900.434129	0.340897083	1.237429567	0.896532485	0.110053389	1.900434129
HS	EsgTsXGBE-lacZ	5	4	7	4	107	296	189	11	0	31	475	73618.5703	285750.022	0.001453438	0.004020725	0.002567287	0.000421089	0.006452176	415.3198334	1148.922156	733.6023226	120.3263069	1843.709541	0.415319833	1.148922156	0.733602323	0.120326307	1.843709541
HS	EsgTsXGBE-lacZ	5	4	8	4	105	216	111	5	0	40	699	84663.3125	320301.706	0.001240207	0.002551282	0.001311076	0.00047246	0.008256233	397.2402938	817.1800329	419.9397391	151.3296357	2644.485384	0.397240294	0.817180033	0.419939739	0.151329636	2.644485384
HS	EsgTsXGBE-lacZ	5	4	9	4	169	469	300	11	3	110	835	99255.2969	336821.177	0.00170268	0.004725189	0.003022509	0.001108253	0.008412649	573.4986514	1591.543595	1018.044943	373.2831459	2833.558425	0.573498651	1.591543595	1.018044943	0.373283146	2.833558425
HS	EsgTsXGBE-lacZ	5	4	10	4	111	414	303	5	0	21	536	92042.5547	375233.785	0.001205964	0.004497919	0.003291956	0.000228155	0.005823393	452.518406	1687.771352	1235.252946	85.61159032	2185.133924	0.452518406	1.687771352	1.235252946	0.08561159	2.185133924
HY	EsgTsXGBE-lacZ	5	4	1	4	215	529	314	7	0	85	780	139609.031	740611.861	0.001540015	0.003789153	0.002249138	0.000608843	0.005587031	1140.553365	2806.291768	1665.738403	450.9164467	4137.821511	1.140553365	2.806291768	1.665738403	0.450916447	4.137821511
HY	EsgTsXGBE-lacZ	5	4	2	4	172	382	210	6	0	29	582	126678.305	947378.876	0.00135777	0.003015512	0.001657742	0.000228926	0.004594315	1286.3226	2856.832752	1570.510151	216.8799733	4352.556705	1.2863226	2.856832752	1.570510151	0.216879973	4.352556705
HY	EsgTsXGBE-lacZ	5	4	3	4	108	377	269	9	0	98	743	138002.219	877454.633	0.000782596	0.00273184	0.001949244	0.000710134	0.005383971	686.692584	2397.065779	1710.373195	623.1099373	4724.190647	0.686692584	2.397065779	1.710373195	0.623109937	4.724190647
HY	EsgTsXGBE-lacZ	5	4	4	4	72	148	76	2	0	61	432	79333.3677	463459.705	0.000907563	0.001865545	0.000957983	0.000768907	0.005445376	420.6187097	864.6051255	443.9864158	356.357518	2523.712258	0.42061871	0.864605126	0.443986416	0.356357518	2.523712258
HY	EsgTsXGBE-lacZ	5	4	5	4	175	412	237	5	0	113	704	112645.258	532457.993	0.00155355	0.0036575	0.00210395	0.001003149	0.006249708	827.1999233	1947.464962	1120.265039	534.1348076	3327.70712	0.827199923	1.947464962	1.120265039	0.534134808	3.32770712
HY	EsgTsXGBE-lacZ	5	4	6	4	76	391	315	5	0	58	615	127812.336	534648.035	0.000594622	0.003059173	0.002464551	0.00045379	0.004811742	317.9133715	1635.580635	1317.667264	242.6180993	2572.588467	0.317913372	1.635580635	1.317667264	0.242618099	2.572588467
HY	EsgTsXGBE-lacZ	5	4	7	4	212	581	369	7	0	179	946	126785.586	647658.364	0.001672114	0.00458254	0.002910425	0.001411832	0.007461416	1082.958856	2967.920261	1884.961405	914.3850718	4832.44848	1.082958856	2.967920261	1.884961405	0.914385072	4.83244848
HY	EsgTsXGBE-lacZ	5	4	8	4	34	193	159	8	0	64	422	97289.5469	792813.931	0.000349472	0.001983769	0.001634297	0.00065783	0.004337568	277.0664939	1572.759804	1295.69331	521.5369297	3438.88413	0.277066494	1.572759804	1.29569331	0.52153693	3.43888413
HY	EsgTsXGBE-lacZ	5	4	9	4	124	414	290	3	0	102	693	108589.125	515202.959	0.001141919	0.003812536	0.002670617	0.000939321	0.006381855	588.3201188	1964.230074	1375.909955	483.9407429	3287.950341	0.588320119	1.964230074	1.375909955	0.483940743	3.287950341
HY	EsgTsXGBE-lacZ	5	4	10	4	55	147	92	3	0	26	534	112687.133	679489.402	0.000488077	0.001304497	0.00081642	0.000230727	0.004738784	331.643162	886.391724	554.748562	156.7767675	3219.95361	0.331643162	0.886391724	0.554748562	0.156776768	3.21995361
HY	EsgTsXGBE-lacZ	5	4	11	4	78	200	122	0	0	42	478	114053.273	604424.542	0.000683891	0.001753567	0.001069676	0.000368249	0.004191024	413.3604678	1059.898635	646.5381675	222.5787134	2533.157738	0.413360468	1.059898635	0.646538168	0.222578713	2.533157738
HY	EsgTsXGBE-lacZ	5	4	12	4	45	92	47	0	0	16	364	96189.2188	763027.279	0.000467828	0.000956448	0.00048862	0.000166339	0.003784208	356.9654477	729.7960265	372.8305787	126.9210481	2887.453844	0.356965448	0.729796026	0.372830579	0.126921048	2.887453844
HY	EsgTsXGBE-lacZ	5	4	13	4	30	135	105	0	0	34	420	105153.547	561628.728	0.000285297	0.001283837	0.00099854	0.000323337	0.003994159	160.2310366	721.0396648	560.8086282	181.5951748	2243.234513	0.160231037	0.721039665	0.560808628	0.181595175	2.243234513
HY	EsgTsXGBE-lacZ	5	4	14	4	72	150	78	4	0	72	500	100801.898	590203.314	0.000714272	0.001488067	0.000773795	0.000714272	0.004960224	421.5658579	878.262204	456.6963461	421.5658579	2927.54068	0.421565858	0.878262204	0.456696346	0.421565858	2.92754068
HY	EsgTsXGBE-lacZ	5	4	15	4	56	346	290	5	0	81	642	124410.258	674449.704	0.000450124	0.002781121	0.002330997	0.000651072	0.005160346	303.5857656	1875.726337	1572.140572	439.1151252	3480.393956	0.303585766	1.875726337	1.572140572	0.439115125	3.480393956
HS	EsgTsXGBE-lacZ	5	5	1	4	29	259	230	3	3	29	729	128935.789	433700.104	0.000224918	0.002008752	0.001783834	0.000224918	0.005653977	97.54702797	871.1958705	773.6488425	97.54702797	2452.130462	0.097547028	0.87119587	0.773648843	0.097547028	2.452130462
HS	EsgTsXGBE-lacZ	5	5	2	4	32	141	109	2	0	20	450	72234.0938	241777.516	0.000443004	0.001951987	0.001508983	0.000276878	0.006229745	107.1084318	471.9465278	364.8380959	66.9427699	1506.212323	0.107108432	0.471946528	0.364838096	0.06694277	1.506212323
HS	EsgTsXGBE-lacZ	5	5	3	4	30	163	133	1	0	32	487	84819.0469	324240.66	0.000353694	0.001921738	0.001568044	0.000377274	0.005741635	114.682022	623.1056527	508.4236307	122.3274901	1861.67149	0.114682022	0.623105653	0.508423631	0.12232749	1.86167149
HS	EsgTsXGBE-lacZ	5	5	4	4	121	331	210	10	0	77	759	125790.148	454516.427	0.00096192	0.002631367	0.001669447	0.000612131	0.006033859	437.2082277	1195.999367	758.791139	278.2234176	2742.487974	0.437208228	1.195999367	0.758791139	0.278223418	2.742487974
HY	EsgTsXGBE-lacZ	5	5	1	4	33	111	78	0	0	14	311	108023.414	938549.002	0.000305489	0.001027555	0.000722066	0.000129602	0.002879005	286.7167026	964.4107269	677.6940243	121.637389	2702.087712	0.286716703	0.964410727	0.677694024	0.121637389	2.702087712
HY	EsgTsXGBE-lacZ	5	5	2	4	159	384	225	8	1	80	802	138798.25	662750.406	0.001145548	0.002766605	0.001621058	0.000576376	0.005778171	759.2121266	1833.56891	1074.356783	381.9935228	3829.485066	0.759212127	1.83356891	1.074356783	0.381993523	3.829485066
HY	EsgTsXGBE-lacZ	5	5	3	4	77	310	233	2	0	49	660	133969.422	633156.228	0.000574758	0.002313961	0.001739203	0.000365755	0.004926497	363.9116212	1465.098735	1101.187114	231.5801226	3119.242468	0.363911621	1.465098735	1.101187114	0.231580123	3.119242468
HY	EsgTsXGBE-lacZ	5	5	4	4	172	454	282	10	0	146	868	128029.891	524493.731	0.001343436	0.003546047	0.002202611	0.001140359	0.006779667	704.6239048	1859.879377	1155.255472	598.110989	3555.892729	0.704623905	1.859879377	1.155255472	0.598110989	3.555892729
HY	EsgTsXGBE-lacZ	5	5	5	4	80	257	177	3	0	74	596	122050.477	680081.389	0.000655467	0.002105686	0.00145022	0.000606307	0.004883225	445.7705734	1432.037967	986.2673937	412.3377804	3320.990772	0.445770573	1.432037967	0.986267394	0.41233778	3.320990772
HS	EsgTsXGBE-lacZ	5	6	1	4	82	184	102	1	0	37	606	83832.9844	325851.199	0.000978135	0.00219484	0.001216705	0.000441354	0.007228658	318.7265551	715.1912943	396.4647392	143.8156407	2355.46698	0.318726555	0.715191294	0.396464739	0.143815641	2.35546698
HS	EsgTsXGBE-lacZ	5	6	2	4	40	135	95	4	0	45	384	79118.6094	444842.788	0.00050557	0.001706299	0.001200729	0.000568766	0.004853473	224.8991944	759.0347813	534.1355868	253.0115938	2159.032267	0.224899194	0.759034781	0.534135587	0.253011594	2.159032267
HS	EsgTsXGBE-lacZ	5	6	3	4	42	195	153	4	0	32	495	78964.0703	327155.861	0.000531887	0.002469478	0.00193759	0.000405248	0.006268674	174.010105	807.9040588	633.8939538	132.5791276	2050.83338	0.174010105	0.807904059	0.633893954	0.132579128	2.05083338
HS	EsgTsXGBE-lacZ	5	6	4	4	41	149	108	4	0	26	391	90952.6016	320802.138	0.000450784	0.001638216	0.001187432	0.000285863	0.004298942	144.6125501	525.54317	380.9306198	91.70551959	1379.109929	0.14461255	0.52554317	0.38093062	0.09170552	1.379109929
HS	EsgTsXGBE-lacZ	5	6	5	4	29	224	195	4	0	53	652	86541.3203	317318.879	0.0003351	0.002588359	0.002253259	0.000612424	0.007533973	106.3335694	821.335157	715.0015876	194.3337648	2390.671975	0.106333569	0.821335157	0.715001588	0.194333765	2.390671975
HS	EsgTsXGBE-lacZ	5	6	6	4	101	322	221	8	0	57	829	127967.875	380193.372	0.000789261	0.002516257	0.001726996	0.000445424	0.006478188	300.0716435	956.6640517	656.5924081	169.3473632	2462.964282	0.300071644	0.956664052	0.656592408	0.169347363	2.462964282
HS	EsgTsXGBE-lacZ	5	6	7	4	94		146	2	0	48	743	131227.969	442000.415	0.000716311		0.001112568	0.000365776	0.005661903	316.6096323		491.7553863	161.6730037	2502.56337	0.316609632		0.491755386	0.161673004	2.50256337
HS	EsgTsXGBE-lacZ	5	6	8	4	145	324	179	7	0	60	728	114078.398	402872.011	0.001271056	0.002840152	0.001569096	0.000525954	0.006381576	512.0727729	1144.217782	632.1450093	211.8921819	2570.958474	0.512072773	1.144217782	0.632145009	0.211892182	2.570958474
HY	EsgTsXGBE-lacZ	5	6	1	4	125	184	59	0	0	55	486	121460.43	682606.44	0.001029142	0.001514897	0.000485755	0.000452822	0.004001303	702.4987891	1034.078218	331.5794285	309.0994672	2731.315292	0.702498789	1.034078218	0.331579428	0.309099467	2.731315292
HY	EsgTsXGBE-lacZ	5	6	2	4	141	437	293	17	8	120	963	118506.023	510836.4	0.001189813	0.003687576	0.002472448	0.001012607	0.008126169	607.7997605	1883.748194	1263.016524	517.2763919	4151.143045	0.607799761	1.883748194	1.263016524	0.517276392	4.151143045
HY	EsgTsXGBE-lacZ	5	6	3	4	62	153	91	1	1	84	754	135199.562	655264.728	0.000458581	0.00113166	0.000673079	0.000621304	0.005576941	300.4921949	741.5371907	441.0449958	407.1184576	3654.372822	0.300492195	0.741537191	0.441044996	0.407118458	3.654372822
HY	EsgTsXGBE-lacZ	5	6	4	4	67	168	101	4	2	136	836	150220.062	768018.078	0.000446012	0.001118359	0.000672347	0.000905338	0.005565169	342.5455331	858.9201428	516.3746097	695.3163061	4274.150234	0.342545533	0.858920143	0.51637461	0.695316306	4.274150234
HY	EsgTsXGBE-lacZ	5	6	5	4	80	240	160	6	1	52	583	125652.359	532915.769	0.000636677	0.001910032	0.001273355	0.00041384	0.004639786	339.2953531	1017.886059	678.5907063	220.5419795	2472.614886	0.339295353	1.017886059	0.678590706	0.22054198	2.472614886
HY	EsgTsXGBE-lacZ	5	6	6	4	69	172	103	2	1	24	441	114466.844	795158.993	0.000602795	0.001502619	0.000899824	0.000209668	0.003852644	479.3175788	1194.820631	715.5030524	166.7191578	3063.464525	0.479317579	1.194820631	0.715503052	0.166719158	3.063464525
HY	EsgTsXGBE-lacZ	5	6	7	4	142	239	97	0	0	7	515	109192.133	612001.775	0.00130046	0.002188802	0.000888342	6.41E-05	0.004716457	795.8838211	1339.550938	543.6671173	39.23370949	2886.480056	0.795883821	1.339550938	0.543667117	0.039233709	2.886480056
HY	EsgTsXGBE-lacZ	5	6	8	4	143	213	70	6	3	29	423	85486.8594	424520.654	0.001672772	0.002491611	0.000818839	0.000339233	0.004948129	710.1261404	1057.740335	347.6141946	144.0115949	2100.582919	0.71012614	1.057740335	0.347614195	0.144011595	2.100582919
HY	EsgTsXGBE-lacZ	5	6	9	4	116	204	88	2	2	34	556	118713.805	587459.779	0.00097714	0.001718419	0.000741279	0.000286403	0.004683533	574.0304117	1009.501759	435.4713468	168.2502931	2751.387146	0.574030412	1.009501759	0.435471347	0.168250293	2.751387146
HY	EsgTsXGBE-lacZ	5	6	10	4	89	148	59	3	2	69	461	103354.305	536206.554	0.000861116	0.001431967	0.000570852	0.000667606	0.004460385	461.7358058	767.8303288	306.094523	357.9749506	2391.687713	0.461735806	0.767830329	0.306094523	0.357974951	2.391687713
HY	EsgTsXGBE-lacZ	5	6	11	4	147	255	108	7	11	93	831	119886.117	558160.034	0.001226164	0.002127019	0.000900855	0.000775736	0.006931578	684.3955501	1187.216771	502.8212205	432.9849399	3868.929947	0.68439555	1.187216771	0.502821221	0.43298494	3.868929947
HY	EsgTsXGBE-lacZ	5	6	12	4	34	238	204	1	1	30	616	131982.531	552679.207	0.00025761	0.001803269	0.001545659	0.000227303	0.004667284	142.3756076	996.6292529	854.2536453	125.6255361	2579.511007	0.142375608	0.996629253	0.854253645	0.125625536	2.579511007
