# Supplementary material for: Multiscale analysis reveals that diet-dependent midgut plasticity emerges from alterations in both stem cell niche coupling and enterocyte size
Source: eLife. 2021 Sep 23;10:e64125. doi: 10.7554/eLife.64125 (PMC8528489; doi:10.7554/eLife.64125)
Supplement: Figure 3—source data 2. [file elife-64125-fig3-data2.csv]

Line	Diet	Day	Repeat	GutNumber	Area
CantonS	HS	5	1	1	106.284
CantonS	HS	5	1	1	97.709
CantonS	HS	5	1	1	71.188
CantonS	HS	5	1	1	89.932
CantonS	HS	5	1	1	74.578
CantonS	HS	5	1	1	65.605
CantonS	HS	5	1	1	148.957
CantonS	HS	5	1	1	75.575
CantonS	HS	5	1	1	88.337
CantonS	HS	5	1	1	80.959
CantonS	HS	5	1	1	82.754
CantonS	HS	5	1	1	107.081
CantonS	HS	5	1	1	85.944
CantonS	HS	5	1	1	114.061
CantonS	HS	5	1	1	82.953
CantonS	HS	5	1	1	55.435
CantonS	HS	5	1	1	92.724
CantonS	HS	5	1	1	56.033
CantonS	HS	5	1	1	49.253
CantonS	HS	5	1	1	43.271
CantonS	HS	5	1	1	101.897
CantonS	HS	5	1	1	92.325
CantonS	HS	5	1	1	105.686
CantonS	HS	5	1	1	104.689
CantonS	HS	5	1	1	67.998
CantonS	HS	5	1	1	97.909
CantonS	HS	5	1	1	105.486
CantonS	HS	5	1	1	77.968
CantonS	HS	5	1	1	101.299
CantonS	HS	5	1	1	97.909
CantonS	HS	5	1	2	204.591
CantonS	HS	5	1	2	232.109
CantonS	HS	5	1	2	170.892
CantonS	HS	5	1	2	173.883
CantonS	HS	5	1	2	178.27
CantonS	HS	5	1	2	278.771
CantonS	HS	5	1	2	201.8
CantonS	HS	5	1	2	225.728
CantonS	HS	5	1	2	278.97
CantonS	HS	5	1	2	145.368
CantonS	HS	5	1	2	215.16
CantonS	HS	5	1	2	230.115
CantonS	HS	5	1	2	273.387
CantonS	HS	5	1	2	175.279
CantonS	HS	5	1	2	192.427
CantonS	HS	5	1	2	221.541
CantonS	HS	5	1	2	262.419
CantonS	HS	5	1	2	278.172
CantonS	HS	5	1	2	124.43
CantonS	HS	5	1	2	213.365
CantonS	HS	5	1	2	128.019
CantonS	HS	5	1	2	110.671
CantonS	HS	5	1	2	113.861
CantonS	HS	5	1	2	134.4
CantonS	HS	5	1	2	155.537
CantonS	HS	5	1	2	172.487
CantonS	HS	5	1	2	149.754
CantonS	HS	5	1	2	159.127
CantonS	HS	5	1	2	148.558
CantonS	HS	5	1	2	134.201
CantonS	HS	5	1	3	202.996
CantonS	HS	5	1	3	152.546
CantonS	HS	5	1	3	117.451
CantonS	HS	5	1	3	94.519
CantonS	HS	5	1	3	123.632
CantonS	HS	5	1	3	80.361
CantonS	HS	5	1	3	206.585
CantonS	HS	5	1	3	101.697
CantonS	HS	5	1	3	158.13
CantonS	HS	5	1	3	247.065
CantonS	HS	5	1	3	212.169
CantonS	HS	5	1	3	138.787
CantonS	HS	5	1	3	186.645
CantonS	HS	5	1	3	208.181
CantonS	HS	5	1	3	184.451
CantonS	HS	5	1	3	151.749
CantonS	HS	5	1	3	223.336
CantonS	HS	5	1	3	168.1
CantonS	HS	5	1	3	124.829
CantonS	HS	5	1	3	115.058
CantonS	HS	5	1	3	226.725
CantonS	HS	5	1	3	115.257
CantonS	HS	5	1	3	99.703
CantonS	HS	5	1	3	100.501
CantonS	HS	5	1	3	164.71
CantonS	HS	5	1	3	53.042
CantonS	HS	5	1	3	145.567
CantonS	HS	5	1	3	117.451
CantonS	HS	5	1	3	113.861
CantonS	HS	5	1	3	132.007
CantonS	HS	5	1	4	167.302
CantonS	HS	5	1	4	220.943
CantonS	HS	5	1	4	148.159
CantonS	HS	5	1	4	204.791
CantonS	HS	5	1	4	125.028
CantonS	HS	5	1	4	252.05
CantonS	HS	5	1	4	114.061
CantonS	HS	5	1	4	185.648
CantonS	HS	5	1	4	92.924
CantonS	HS	5	1	4	66.801
CantonS	HS	5	1	4	176.674
CantonS	HS	5	1	4	119.245
CantonS	HS	5	1	4	120.043
CantonS	HS	5	1	4	98.906
CantonS	HS	5	1	4	92.525
CantonS	HS	5	1	4	107.68
CantonS	HS	5	1	4	128.817
CantonS	HS	5	1	4	50.849
CantonS	HS	5	1	4	71.786
CantonS	HS	5	1	4	71.388
CantonS	HS	5	1	4	64.608
CantonS	HS	5	1	4	105.287
CantonS	HS	5	1	4	73.98
CantonS	HS	5	1	4	67.998
CantonS	HS	5	1	4	57.23
CantonS	HS	5	1	4	77.968
CantonS	HS	5	1	4	124.23
CantonS	HS	5	1	4	99.703
CantonS	HS	5	1	4	124.031
CantonS	HS	5	1	4	108.278
CantonS	HS	5	1	5	189.636
CantonS	HS	5	1	5	214.562
CantonS	HS	5	1	5	200.603
CantonS	HS	5	1	5	241.282
CantonS	HS	5	1	5	168.698
CantonS	HS	5	1	5	154.939
CantonS	HS	5	1	5	100.501
CantonS	HS	5	1	5	104.29
CantonS	HS	5	1	5	118.846
CantonS	HS	5	1	5	109.075
CantonS	HS	5	1	5	123.632
CantonS	HS	5	1	5	107.48
CantonS	HS	5	1	5	154.54
CantonS	HS	5	1	5	111.07
CantonS	HS	5	1	5	150.951
CantonS	HS	5	1	5	122.236
CantonS	HS	5	1	5	106.483
CantonS	HS	5	1	5	90.132
CantonS	HS	5	1	5	153.743
CantonS	HS	5	1	5	132.406
CantonS	HS	5	1	5	197.811
CantonS	HS	5	1	5	111.468
CantonS	HS	5	1	5	124.829
CantonS	HS	5	1	5	142.376
CantonS	HS	5	1	5	188.041
CantonS	HS	5	1	5	135.796
CantonS	HS	5	1	5	162.118
CantonS	HS	5	1	5	115.456
CantonS	HS	5	1	5	210.374
CantonS	HS	5	1	5	67.001
CantonS	HS	5	1	6	83.153
CantonS	HS	5	1	6	54.438
CantonS	HS	5	1	6	72.584
CantonS	HS	5	1	6	71.388
CantonS	HS	5	1	6	99.903
CantonS	HS	5	1	6	99.105
CantonS	HS	5	1	6	85.545
CantonS	HS	5	1	6	50.25
CantonS	HS	5	1	6	73.78
CantonS	HS	5	1	6	84.15
CantonS	HS	5	1	6	83.153
CantonS	HS	5	1	6	73.98
CantonS	HS	5	1	6	89.733
CantonS	HS	5	1	6	86.343
CantonS	HS	5	1	6	74.977
CantonS	HS	5	1	6	116.055
CantonS	HS	5	1	6	52.444
CantonS	HS	5	1	6	53.84
CantonS	HS	5	1	6	112.266
CantonS	HS	5	1	6	63.013
CantonS	HS	5	1	6	75.575
CantonS	HS	5	1	6	76.772
CantonS	HS	5	1	6	79.763
CantonS	HS	5	1	6	63.411
CantonS	HS	5	1	6	104.689
CantonS	HS	5	1	6	42.474
CantonS	HS	5	1	6	44.667
CantonS	HS	5	1	6	59.224
CantonS	HS	5	1	6	55.834
CantonS	HS	5	1	6	73.182
CantonS	HS	5	2	1	160.921
CantonS	HS	5	2	1	163.912
CantonS	HS	5	2	1	139.984
CantonS	HS	5	2	1	172.088
CantonS	HS	5	2	1	144.37
CantonS	HS	5	2	1	148.957
CantonS	HS	5	2	1	127.421
CantonS	HS	5	2	1	139.984
CantonS	HS	5	2	1	192.427
CantonS	HS	5	2	1	122.835
CantonS	HS	5	2	1	134.001
CantonS	HS	5	2	1	140.183
CantonS	HS	5	2	1	201.8
CantonS	HS	5	2	1	168.299
CantonS	HS	5	2	1	205.19
CantonS	HS	5	2	1	150.153
CantonS	HS	5	2	1	250.255
CantonS	HS	5	2	1	126.823
CantonS	HS	5	2	1	177.273
CantonS	HS	5	2	1	225.13
CantonS	HS	5	2	1	176.276
CantonS	HS	5	2	1	131.808
CantonS	HS	5	2	1	119.843
CantonS	HS	5	2	1	127.221
CantonS	HS	5	2	1	104.489
CantonS	HS	5	2	1	74.778
CantonS	HS	5	2	1	162.317
CantonS	HS	5	2	1	148.757
CantonS	HS	5	2	1	130.412
CantonS	HS	5	2	1	251.053
CantonS	HS	5	2	2	252.05
CantonS	HS	5	2	2	132.605
CantonS	HS	5	2	2	108.876
CantonS	HS	5	2	2	95.915
CantonS	HS	5	2	2	286.747
CantonS	HS	5	2	2	136.195
CantonS	HS	5	2	2	201.999
CantonS	HS	5	2	2	357.337
CantonS	HS	5	2	2	102.495
CantonS	HS	5	2	2	193.225
CantonS	HS	5	2	2	157.133
CantonS	HS	5	2	2	139.984
CantonS	HS	5	2	2	264.812
CantonS	HS	5	2	2	100.7
CantonS	HS	5	2	2	419.352
CantonS	HS	5	2	2	241.482
CantonS	HS	5	2	2	194.82
CantonS	HS	5	2	2	291.533
CantonS	HS	5	2	2	133.403
CantonS	HS	5	2	2	47.06
CantonS	HS	5	2	2	53.84
CantonS	HS	5	2	2	231.511
CantonS	HS	5	2	2	58.825
CantonS	HS	5	2	2	160.323
CantonS	HS	5	2	2	65.605
CantonS	HS	5	2	2	86.343
CantonS	HS	5	2	2	149.156
CantonS	HS	5	2	2	132.406
CantonS	HS	5	2	2	184.85
CantonS	HS	5	2	2	87.739
CantonS	HS	5	2	3	117.65
CantonS	HS	5	2	3	94.918
CantonS	HS	5	2	3	81.956
CantonS	HS	5	2	3	132.605
CantonS	HS	5	2	3	100.7
CantonS	HS	5	2	3	153.743
CantonS	HS	5	2	3	167.701
CantonS	HS	5	2	3	96.313
CantonS	HS	5	2	3	123.034
CantonS	HS	5	2	3	99.504
CantonS	HS	5	2	3	130.213
CantonS	HS	5	2	3	98.108
CantonS	HS	5	2	3	113.662
CantonS	HS	5	2	3	125.028
CantonS	HS	5	2	3	79.164
CantonS	HS	5	2	3	96.712
CantonS	HS	5	2	3	58.626
CantonS	HS	5	2	3	109.873
CantonS	HS	5	2	3	86.343
CantonS	HS	5	2	3	110.073
CantonS	HS	5	2	3	92.924
CantonS	HS	5	2	3	96.114
CantonS	HS	5	2	3	66.004
CantonS	HS	5	2	3	76.373
CantonS	HS	5	2	3	83.751
CantonS	HS	5	2	3	146.165
CantonS	HS	5	2	3	148.757
CantonS	HS	5	2	3	116.653
CantonS	HS	5	2	3	184.85
CantonS	HS	5	2	3	159.326
CantonS	HS	5	2	4	106.284
CantonS	HS	5	2	4	61.417
CantonS	HS	5	2	4	42.872
CantonS	HS	5	2	4	118.049
CantonS	HS	5	2	4	60.42
CantonS	HS	5	2	4	59.224
CantonS	HS	5	2	4	61.617
CantonS	HS	5	2	4	38.884
CantonS	HS	5	2	4	37.289
CantonS	HS	5	2	4	49.054
CantonS	HS	5	2	4	50.25
CantonS	HS	5	2	4	44.867
CantonS	HS	5	2	4	65.007
CantonS	HS	5	2	4	49.852
CantonS	HS	5	2	4	47.259
CantonS	HS	5	2	4	46.462
CantonS	HS	5	2	4	69.792
CantonS	HS	5	2	4	82.355
CantonS	HS	5	2	4	96.114
CantonS	HS	5	2	4	106.683
CantonS	HS	5	2	4	94.718
CantonS	HS	5	2	4	61.218
CantonS	HS	5	2	4	55.036
CantonS	HS	5	2	4	67.798
CantonS	HS	5	2	4	75.974
CantonS	HS	5	2	4	50.25
CantonS	HS	5	2	4	82.554
CantonS	HS	5	2	4	65.206
CantonS	HS	5	2	4	87.938
CantonS	HS	5	2	4	80.162
CantonS	HS	5	2	5	92.525
CantonS	HS	5	2	5	88.935
CantonS	HS	5	2	5	91.129
CantonS	HS	5	2	5	86.742
CantonS	HS	5	2	5	60.221
CantonS	HS	5	2	5	77.37
CantonS	HS	5	2	5	91.328
CantonS	HS	5	2	5	155.537
CantonS	HS	5	2	5	188.838
CantonS	HS	5	2	5	142.576
CantonS	HS	5	2	5	73.182
CantonS	HS	5	2	5	108.278
CantonS	HS	5	2	5	122.835
CantonS	HS	5	2	5	101.697
CantonS	HS	5	2	5	101.697
CantonS	HS	5	2	5	110.272
CantonS	HS	5	2	5	113.064
CantonS	HS	5	2	5	186.645
CantonS	HS	5	2	5	145.567
CantonS	HS	5	2	5	141.778
CantonS	HS	5	2	5	161.918
CantonS	HS	5	2	5	184.85
CantonS	HS	5	2	5	163.912
CantonS	HS	5	2	5	78.167
CantonS	HS	5	2	5	113.064
CantonS	HS	5	2	5	149.555
CantonS	HS	5	2	5	99.504
CantonS	HS	5	2	5	121.638
CantonS	HS	5	2	5	68.795
CantonS	HS	5	2	5	145.368
CantonS	HS	5	2	6	156.933
CantonS	HS	5	2	6	130.213
CantonS	HS	5	2	6	102.694
CantonS	HS	5	2	6	134.201
CantonS	HS	5	2	6	87.938
CantonS	HS	5	2	6	129.016
CantonS	HS	5	2	6	130.611
CantonS	HS	5	2	6	140.981
CantonS	HS	5	2	6	97.111
CantonS	HS	5	2	6	108.876
CantonS	HS	5	2	6	203.794
CantonS	HS	5	2	6	88.935
CantonS	HS	5	2	6	126.025
CantonS	HS	5	2	6	93.123
CantonS	HS	5	2	6	137.591
CantonS	HS	5	2	6	120.442
CantonS	HS	5	2	6	105.486
CantonS	HS	5	2	6	120.043
CantonS	HS	5	2	6	111.07
CantonS	HS	5	2	6	139.784
CantonS	HS	5	2	6	246.467
CantonS	HS	5	2	6	99.703
CantonS	HS	5	2	6	87.141
CantonS	HS	5	2	6	136.394
CantonS	HS	5	2	6	84.548
CantonS	HS	5	2	6	163.514
CantonS	HS	5	2	6	117.251
CantonS	HS	5	2	6	97.909
CantonS	HS	5	2	6	75.974
CantonS	HS	5	2	6	165.707
CantonS	HS	5	2	7	232.708
CantonS	HS	5	2	7	204.192
CantonS	HS	5	2	7	102.296
CantonS	HS	5	2	7	171.49
CantonS	HS	5	2	7	158.728
CantonS	HS	5	2	7	84.349
CantonS	HS	5	2	7	121.838
CantonS	HS	5	2	7	67.599
CantonS	HS	5	2	7	317.256
CantonS	HS	5	2	7	202.198
CantonS	HS	5	2	7	203.794
CantonS	HS	5	2	7	199.806
CantonS	HS	5	2	7	124.43
CantonS	HS	5	2	7	208.779
CantonS	HS	5	2	7	280.765
CantonS	HS	5	2	7	139.585
CantonS	HS	5	2	7	215.16
CantonS	HS	5	2	7	265.809
CantonS	HS	5	2	7	117.65
CantonS	HS	5	2	7	123.632
CantonS	HS	5	2	7	108.677
CantonS	HS	5	2	7	176.276
CantonS	HS	5	2	7	164.112
CantonS	HS	5	2	7	96.313
CantonS	HS	5	2	7	75.176
CantonS	HS	5	2	7	95.316
CantonS	HS	5	2	7	158.927
CantonS	HS	5	2	7	145.966
CantonS	HS	5	2	7	107.281
CantonS	HS	5	2	7	89.733
CantonS	HS	5	3	1	131.409
CantonS	HS	5	3	1	219.946
CantonS	HS	5	3	1	153.144
CantonS	HS	5	3	1	99.703
CantonS	HS	5	3	1	155.138
CantonS	HS	5	3	1	167.502
CantonS	HS	5	3	1	187.044
CantonS	HS	5	3	1	186.445
CantonS	HS	5	3	1	154.341
CantonS	HS	5	3	1	97.51
CantonS	HS	5	3	1	87.34
CantonS	HS	5	3	1	134.998
CantonS	HS	5	3	1	141.778
CantonS	HS	5	3	1	87.739
CantonS	HS	5	3	1	127.221
CantonS	HS	5	3	1	134.001
CantonS	HS	5	3	1	105.486
CantonS	HS	5	3	1	260.824
CantonS	HS	5	3	1	226.526
CantonS	HS	5	3	1	324.036
CantonS	HS	5	3	1	315.661
CantonS	HS	5	3	1	277.774
CantonS	HS	5	3	1	227.722
CantonS	HS	5	3	1	129.814
CantonS	HS	5	3	1	240.883
CantonS	HS	5	3	1	218.35
CantonS	HS	5	3	1	173.085
CantonS	HS	5	3	1	106.284
CantonS	HS	5	3	1	301.104
CantonS	HS	5	3	1	108.477
CantonS	HS	5	3	2	273.985
CantonS	HS	5	3	2	183.853
CantonS	HS	5	3	2	301.104
CantonS	HS	5	3	2	272.19
CantonS	HS	5	3	2	198.41
CantonS	HS	5	3	2	229.517
CantonS	HS	5	3	2	261.622
CantonS	HS	5	3	2	195.618
CantonS	HS	5	3	2	84.947
CantonS	HS	5	3	2	274.583
CantonS	HS	5	3	2	157.531
CantonS	HS	5	3	2	192.029
CantonS	HS	5	3	2	127.022
CantonS	HS	5	3	2	213.565
CantonS	HS	5	3	2	241.282
CantonS	HS	5	3	2	71.786
CantonS	HS	5	3	2	90.531
CantonS	HS	5	3	2	137.391
CantonS	HS	5	3	2	124.031
CantonS	HS	5	3	2	85.147
CantonS	HS	5	3	2	99.305
CantonS	HS	5	3	2	82.953
CantonS	HS	5	3	2	271.791
CantonS	HS	5	3	2	185.847
CantonS	HS	5	3	2	159.924
CantonS	HS	5	3	2	198.609
CantonS	HS	5	3	2	242.877
CantonS	HS	5	3	2	183.255
CantonS	HS	5	3	2	161.719
CantonS	HS	5	3	2	184.052
CantonS	HS	5	3	3	112.864
CantonS	HS	5	3	3	87.54
CantonS	HS	5	3	3	173.284
CantonS	HS	5	3	3	148.159
CantonS	HS	5	3	3	134.4
CantonS	HS	5	3	3	103.891
CantonS	HS	5	3	3	140.981
CantonS	HS	5	3	3	104.489
CantonS	HS	5	3	3	245.47
CantonS	HS	5	3	3	133.802
CantonS	HS	5	3	3	146.365
CantonS	HS	5	3	3	80.76
CantonS	HS	5	3	3	111.269
CantonS	HS	5	3	3	111.269
CantonS	HS	5	3	3	239.089
CantonS	HS	5	3	3	195.817
CantonS	HS	5	3	3	139.784
CantonS	HS	5	3	3	217.353
CantonS	HS	5	3	3	201.401
CantonS	HS	5	3	3	158.329
CantonS	HS	5	3	3	93.322
CantonS	HS	5	3	3	90.73
CantonS	HS	5	3	3	95.715
CantonS	HS	5	3	3	153.344
CantonS	HS	5	3	3	145.966
CantonS	HS	5	3	3	194.621
CantonS	HS	5	3	3	116.254
CantonS	HS	5	3	3	131.01
CantonS	HS	5	3	3	114.26
CantonS	HS	5	3	3	99.105
CantonS	HS	5	3	4	187.243
CantonS	HS	5	3	4	57.828
CantonS	HS	5	3	4	118.448
CantonS	HS	5	3	4	109.474
CantonS	HS	5	3	4	135.397
CantonS	HS	5	3	4	80.162
CantonS	HS	5	3	4	98.308
CantonS	HS	5	3	4	123.433
CantonS	HS	5	3	4	150.153
CantonS	HS	5	3	4	115.656
CantonS	HS	5	3	4	125.028
CantonS	HS	5	3	4	139.984
CantonS	HS	5	3	4	44.468
CantonS	HS	5	3	4	96.313
CantonS	HS	5	3	4	112.465
CantonS	HS	5	3	4	102.894
CantonS	HS	5	3	4	120.641
CantonS	HS	5	3	4	94.319
CantonS	HS	5	3	4	118.049
CantonS	HS	5	3	4	129.415
CantonS	HS	5	3	4	140.981
CantonS	HS	5	3	4	227.922
CantonS	HS	5	3	4	173.284
CantonS	HS	5	3	4	105.486
CantonS	HS	5	3	4	76.373
CantonS	HS	5	3	4	95.117
CantonS	HS	5	3	4	124.23
CantonS	HS	5	3	4	95.117
CantonS	HS	5	3	4	189.636
CantonS	HS	5	3	4	97.31
CantonS	HS	5	3	5	178.27
CantonS	HS	5	3	5	92.525
CantonS	HS	5	3	5	122.635
CantonS	HS	5	3	5	135.198
CantonS	HS	5	3	5	57.629
CantonS	HS	5	3	5	54.438
CantonS	HS	5	3	5	105.686
CantonS	HS	5	3	5	92.126
CantonS	HS	5	3	5	83.352
CantonS	HS	5	3	5	74.379
CantonS	HS	5	3	5	82.953
CantonS	HS	5	3	5	117.451
CantonS	HS	5	3	5	183.853
CantonS	HS	5	3	5	102.495
CantonS	HS	5	3	5	131.409
CantonS	HS	5	3	5	88.736
CantonS	HS	5	3	5	91.528
CantonS	HS	5	3	5	93.921
CantonS	HS	5	3	5	76.971
CantonS	HS	5	3	5	139.186
CantonS	HS	5	3	5	93.921
CantonS	HS	5	3	5	228.919
CantonS	HS	5	3	5	92.724
CantonS	HS	5	3	5	188.24
CantonS	HS	5	3	5	219.946
CantonS	HS	5	3	5	81.358
CantonS	HS	5	3	5	60.819
CantonS	HS	5	3	5	63.013
CantonS	HS	5	3	5	89.135
CantonS	HS	5	3	5	87.739
CantonS	HS	5	3	6	178.07
CantonS	HS	5	3	6	104.29
CantonS	HS	5	3	6	123.433
CantonS	HS	5	3	6	92.724
CantonS	HS	5	3	6	153.144
CantonS	HS	5	3	6	101.498
CantonS	HS	5	3	6	125.626
CantonS	HS	5	3	6	130.811
CantonS	HS	5	3	6	130.611
CantonS	HS	5	3	6	146.564
CantonS	HS	5	3	6	190.234
CantonS	HS	5	3	6	161.519
CantonS	HS	5	3	6	102.296
CantonS	HS	5	3	6	110.272
CantonS	HS	5	3	6	165.707
CantonS	HS	5	3	6	57.23
CantonS	HS	5	3	6	122.236
CantonS	HS	5	3	6	122.037
CantonS	HS	5	3	6	97.111
CantonS	HS	5	3	6	130.213
CantonS	HS	5	3	6	126.224
CantonS	HS	5	3	6	120.043
CantonS	HS	5	3	6	139.385
CantonS	HS	5	3	6	160.323
CantonS	HS	5	3	6	221.142
CantonS	HS	5	3	6	186.046
CantonS	HS	5	3	6	91.328
CantonS	HS	5	3	6	155.338
CantonS	HS	5	3	6	129.415
CantonS	HS	5	3	6	133.004
CantonS	HS	5	3	7	120.641
CantonS	HS	5	3	7	90.73
CantonS	HS	5	3	7	172.686
CantonS	HS	5	3	7	219.148
CantonS	HS	5	3	7	94.519
CantonS	HS	5	3	7	134.001
CantonS	HS	5	3	7	117.451
CantonS	HS	5	3	7	120.242
CantonS	HS	5	3	7	168.698
CantonS	HS	5	3	7	125.227
CantonS	HS	5	3	7	147.162
CantonS	HS	5	3	7	119.644
CantonS	HS	5	3	7	105.087
CantonS	HS	5	3	7	103.293
CantonS	HS	5	3	7	132.406
CantonS	HS	5	3	7	112.067
CantonS	HS	5	3	7	204.591
CantonS	HS	5	3	7	125.826
CantonS	HS	5	3	7	172.088
CantonS	HS	5	3	7	81.159
CantonS	HS	5	3	7	152.945
CantonS	HS	5	3	7	105.287
CantonS	HS	5	3	7	180.862
CantonS	HS	5	3	7	204.99
CantonS	HS	5	3	7	100.501
CantonS	HS	5	3	7	114.26
CantonS	HS	5	3	7	77.968
CantonS	HS	5	3	7	90.929
CantonS	HS	5	3	7	80.162
CantonS	HS	5	3	7	73.382
CantonS	HY	5	1	1	277.774
CantonS	HY	5	1	1	213.764
CantonS	HY	5	1	1	179.267
CantonS	HY	5	1	1	234.502
CantonS	HY	5	1	1	230.315
CantonS	HY	5	1	1	180.463
CantonS	HY	5	1	1	258.431
CantonS	HY	5	1	1	184.451
CantonS	HY	5	1	1	157.93
CantonS	HY	5	1	1	234.103
CantonS	HY	5	1	1	274.384
CantonS	HY	5	1	1	201.8
CantonS	HY	5	1	1	212.169
CantonS	HY	5	1	1	204.791
CantonS	HY	5	1	1	268.601
CantonS	HY	5	1	1	252.25
CantonS	HY	5	1	1	244.871
CantonS	HY	5	1	1	253.047
CantonS	HY	5	1	1	282.161
CantonS	HY	5	1	1	187.841
CantonS	HY	5	1	1	252.449
CantonS	HY	5	1	1	217.154
CantonS	HY	5	1	1	272.589
CantonS	HY	5	1	1	260.625
CantonS	HY	5	1	1	317.854
CantonS	HY	5	1	1	146.963
CantonS	HY	5	1	1	270.994
CantonS	HY	5	1	1	235.3
CantonS	HY	5	1	1	278.571
CantonS	HY	5	1	1	246.267
CantonS	HY	5	1	2	303.896
CantonS	HY	5	1	2	249.059
CantonS	HY	5	1	2	238.889
CantonS	HY	5	1	2	209.377
CantonS	HY	5	1	2	322.64
CantonS	HY	5	1	2	305.292
CantonS	HY	5	1	2	182.457
CantonS	HY	5	1	2	235.3
CantonS	HY	5	1	2	164.511
CantonS	HY	5	1	2	152.347
CantonS	HY	5	1	2	156.933
CantonS	HY	5	1	2	382.462
CantonS	HY	5	1	2	222.937
CantonS	HY	5	1	2	204.192
CantonS	HY	5	1	2	211.371
CantonS	HY	5	1	2	247.464
CantonS	HY	5	1	2	191.43
CantonS	HY	5	1	2	323.238
CantonS	HY	5	1	2	202.797
CantonS	HY	5	1	2	275.381
CantonS	HY	5	1	2	289.14
CantonS	HY	5	1	2	255.639
CantonS	HY	5	1	2	233.306
CantonS	HY	5	1	2	212.767
CantonS	HY	5	1	2	291.533
CantonS	HY	5	1	2	193.225
CantonS	HY	5	1	2	225.728
CantonS	HY	5	1	2	251.053
CantonS	HY	5	1	2	200.005
CantonS	HY	5	1	2	242.08
CantonS	HY	5	1	3	216.556
CantonS	HY	5	1	3	179.267
CantonS	HY	5	1	3	248.261
CantonS	HY	5	1	3	123.632
CantonS	HY	5	1	3	229.717
CantonS	HY	5	1	3	222.937
CantonS	HY	5	1	3	279.967
CantonS	HY	5	1	3	161.918
CantonS	HY	5	1	3	194.422
CantonS	HY	5	1	3	212.568
CantonS	HY	5	1	3	180.862
CantonS	HY	5	1	3	171.689
CantonS	HY	5	1	3	215.359
CantonS	HY	5	1	3	139.385
CantonS	HY	5	1	3	198.011
CantonS	HY	5	1	3	247.464
CantonS	HY	5	1	3	269.598
CantonS	HY	5	1	3	313.069
CantonS	HY	5	1	3	247.663
CantonS	HY	5	1	3	232.109
CantonS	HY	5	1	3	178.868
CantonS	HY	5	1	3	134.799
CantonS	HY	5	1	3	211.371
CantonS	HY	5	1	3	100.9
CantonS	HY	5	1	3	176.874
CantonS	HY	5	1	3	251.452
CantonS	HY	5	1	3	274.583
CantonS	HY	5	1	3	179.067
CantonS	HY	5	1	3	192.427
CantonS	HY	5	1	3	184.252
CantonS	HY	5	1	4	419.352
CantonS	HY	5	1	4	469.005
CantonS	HY	5	1	4	225.13
CantonS	HY	5	1	4	206.984
CantonS	HY	5	1	4	325.232
CantonS	HY	5	1	4	183.255
CantonS	HY	5	1	4	363.319
CantonS	HY	5	1	4	283.158
CantonS	HY	5	1	4	358.533
CantonS	HY	5	1	4	386.251
CantonS	HY	5	1	4	288.542
CantonS	HY	5	1	4	239.687
CantonS	HY	5	1	4	269.199
CantonS	HY	5	1	4	236.496
CantonS	HY	5	1	4	385.653
CantonS	HY	5	1	4	239.288
CantonS	HY	5	1	4	310.077
CantonS	HY	5	1	4	290.137
CantonS	HY	5	1	4	374.286
CantonS	HY	5	1	4	313.866
CantonS	HY	5	1	4	243.874
CantonS	HY	5	1	4	277.574
CantonS	HY	5	1	4	221.94
CantonS	HY	5	1	4	354.745
CantonS	HY	5	1	4	193.026
CantonS	HY	5	1	4	220.544
CantonS	HY	5	1	4	177.472
CantonS	HY	5	1	4	257.035
CantonS	HY	5	1	4	297.714
CantonS	HY	5	1	4	258.631
CantonS	HY	5	1	5	369.501
CantonS	HY	5	1	5	323.637
CantonS	HY	5	1	5	290.934
CantonS	HY	5	1	5	414.567
CantonS	HY	5	1	5	309.28
CantonS	HY	5	1	5	415.165
CantonS	HY	5	1	6	270.794
CantonS	HY	5	1	6	301.902
CantonS	HY	5	1	6	279.967
CantonS	HY	5	1	6	269
CantonS	HY	5	1	6	273.985
CantonS	HY	5	1	6	232.109
CantonS	HY	5	1	6	219.148
CantonS	HY	5	1	6	212.767
CantonS	HY	5	1	6	272.788
CantonS	HY	5	1	6	303.896
CantonS	HY	5	1	6	203.594
CantonS	HY	5	1	6	318.453
CantonS	HY	5	1	6	185.448
CantonS	HY	5	1	6	302.5
CantonS	HY	5	1	6	181.46
CantonS	HY	5	1	6	254.842
CantonS	HY	5	1	6	161.32
CantonS	HY	5	1	6	261.422
CantonS	HY	5	1	6	195.219
CantonS	HY	5	1	6	282.161
CantonS	HY	5	1	6	333.209
CantonS	HY	5	1	6	171.091
CantonS	HY	5	1	6	237.493
CantonS	HY	5	1	6	212.966
CantonS	HY	5	1	6	303.896
CantonS	HY	5	1	6	289.539
CantonS	HY	5	1	6	230.913
CantonS	HY	5	1	6	218.749
CantonS	HY	5	1	6	210.175
CantonS	HY	5	1	6	257.633
CantonS	HY	5	1	7	528.228
CantonS	HY	5	1	7	460.63
CantonS	HY	5	1	7	770.707
CantonS	HY	5	1	7	564.72
CantonS	HY	5	1	7	347.765
CantonS	HY	5	1	7	406.79
CantonS	HY	5	1	7	383.06
CantonS	HY	5	1	7	403.799
CantonS	HY	5	1	7	309.679
CantonS	HY	5	1	7	420.349
CantonS	HY	5	1	7	332.411
CantonS	HY	5	1	7	302.101
CantonS	HY	5	1	7	449.662
CantonS	HY	5	1	7	447.07
CantonS	HY	5	1	7	365.712
CantonS	HY	5	1	7	276.178
CantonS	HY	5	1	7	271.393
CantonS	HY	5	1	7	669.807
CantonS	HY	5	1	7	812.582
CantonS	HY	5	1	7	619.158
CantonS	HY	5	1	7	534.211
CantonS	HY	5	1	7	527.231
CantonS	HY	5	1	7	466.412
CantonS	HY	5	1	7	374.885
CantonS	HY	5	1	7	323.438
CantonS	HY	5	1	7	470.999
CantonS	HY	5	1	7	166.106
CantonS	HY	5	1	7	225.928
CantonS	HY	5	1	7	249.458
CantonS	HY	5	1	7	316.259
CantonS	HY	5	2	1	476.981
CantonS	HY	5	2	1	328.024
CantonS	HY	5	2	1	268.003
CantonS	HY	5	2	1	230.115
CantonS	HY	5	2	1	246.866
CantonS	HY	5	2	1	355.941
CantonS	HY	5	2	1	163.514
CantonS	HY	5	2	1	254.842
CantonS	HY	5	2	1	422.144
CantonS	HY	5	2	1	130.811
CantonS	HY	5	2	1	205.19
CantonS	HY	5	2	1	276.777
CantonS	HY	5	2	1	140.382
CantonS	HY	5	2	1	193.425
CantonS	HY	5	2	1	246.068
CantonS	HY	5	2	1	183.055
CantonS	HY	5	2	1	188.24
CantonS	HY	5	2	1	193.823
CantonS	HY	5	2	1	146.564
CantonS	HY	5	2	1	196.814
CantonS	HY	5	2	1	157.133
CantonS	HY	5	2	1	174.082
CantonS	HY	5	2	1	171.091
CantonS	HY	5	2	1	248.062
CantonS	HY	5	2	1	247.863
CantonS	HY	5	2	1	304.295
CantonS	HY	5	2	1	374.486
CantonS	HY	5	2	1	184.451
CantonS	HY	5	2	1	400.608
CantonS	HY	5	2	1	246.068
CantonS	HY	5	2	2	523.443
CantonS	HY	5	2	2	258.83
CantonS	HY	5	2	2	375.283
CantonS	HY	5	2	2	224.532
CantonS	HY	5	2	2	264.015
CantonS	HY	5	2	2	196.416
CantonS	HY	5	2	2	253.645
CantonS	HY	5	2	2	215.359
CantonS	HY	5	2	2	263.616
CantonS	HY	5	2	2	214.163
CantonS	HY	5	2	2	225.33
CantonS	HY	5	2	2	335.801
CantonS	HY	5	2	2	345.372
CantonS	HY	5	2	2	136.594
CantonS	HY	5	2	2	323.637
CantonS	HY	5	2	2	214.761
CantonS	HY	5	2	2	260.824
CantonS	HY	5	2	2	286.149
CantonS	HY	5	2	2	168.299
CantonS	HY	5	2	2	238.291
CantonS	HY	5	2	2	158.528
CantonS	HY	5	2	2	208.978
CantonS	HY	5	2	2	195.219
CantonS	HY	5	2	2	234.303
CantonS	HY	5	2	2	161.121
CantonS	HY	5	2	2	283.357
CantonS	HY	5	2	2	329.021
CantonS	HY	5	2	2	234.303
CantonS	HY	5	2	2	271.791
CantonS	HY	5	2	2	228.121
CantonS	HY	5	2	3	214.362
CantonS	HY	5	2	3	183.454
CantonS	HY	5	2	3	198.21
CantonS	HY	5	2	3	187.243
CantonS	HY	5	2	3	217.952
CantonS	HY	5	2	3	264.015
CantonS	HY	5	2	3	217.353
CantonS	HY	5	2	3	144.37
CantonS	HY	5	2	3	174.88
CantonS	HY	5	2	3	150.153
CantonS	HY	5	2	3	215.758
CantonS	HY	5	2	3	105.486
CantonS	HY	5	2	3	153.344
CantonS	HY	5	2	3	180.862
CantonS	HY	5	2	3	259.827
CantonS	HY	5	2	3	177.472
CantonS	HY	5	2	3	164.112
CantonS	HY	5	2	3	261.622
CantonS	HY	5	2	3	206.785
CantonS	HY	5	2	3	179.267
CantonS	HY	5	2	3	357.736
CantonS	HY	5	2	3	368.504
CantonS	HY	5	2	3	333.009
CantonS	HY	5	2	3	141.579
CantonS	HY	5	2	3	177.273
CantonS	HY	5	2	3	318.851
CantonS	HY	5	2	3	201.201
CantonS	HY	5	2	3	286.547
CantonS	HY	5	2	3	249.258
CantonS	HY	5	2	3	226.526
CantonS	HY	5	2	4	415.165
CantonS	HY	5	2	4	392.632
CantonS	HY	5	2	4	258.631
CantonS	HY	5	2	4	487.35
CantonS	HY	5	2	4	429.323
CantonS	HY	5	2	4	404.197
CantonS	HY	5	2	4	342.78
CantonS	HY	5	2	4	551.36
CantonS	HY	5	2	4	571.101
CantonS	HY	5	2	4	241.282
CantonS	HY	5	2	4	326.628
CantonS	HY	5	2	4	284.155
CantonS	HY	5	2	4	520.452
CantonS	HY	5	2	4	332.61
CantonS	HY	5	2	4	287.146
CantonS	HY	5	2	4	245.071
CantonS	HY	5	2	4	249.458
CantonS	HY	5	2	4	279.768
CantonS	HY	5	2	4	302.899
CantonS	HY	5	2	4	275.979
CantonS	HY	5	2	4	358.334
CantonS	HY	5	2	4	341.783
CantonS	HY	5	2	4	381.266
CantonS	HY	5	2	4	394.028
CantonS	HY	5	2	4	306.289
CantonS	HY	5	2	4	366.111
CantonS	HY	5	2	4	337.994
CantonS	HY	5	2	4	310.875
CantonS	HY	5	2	4	315.661
CantonS	HY	5	2	4	296.717
CantonS	HY	5	2	5	565.517
CantonS	HY	5	2	5	360.727
CantonS	HY	5	2	5	173.883
CantonS	HY	5	2	5	160.921
CantonS	HY	5	2	5	738.603
CantonS	HY	5	2	5	471.996
CantonS	HY	5	2	5	340.786
CantonS	HY	5	2	5	335.203
CantonS	HY	5	2	5	285.55
CantonS	HY	5	2	5	338.194
CantonS	HY	5	2	5	555.148
CantonS	HY	5	2	5	278.97
CantonS	HY	5	2	5	240.086
CantonS	HY	5	2	5	381.465
CantonS	HY	5	2	5	224.133
CantonS	HY	5	2	5	304.295
CantonS	HY	5	2	5	329.619
CantonS	HY	5	2	5	491.139
CantonS	HY	5	2	5	443.879
CantonS	HY	5	2	5	247.065
CantonS	HY	5	2	5	458.037
CantonS	HY	5	2	5	157.531
CantonS	HY	5	2	5	234.103
CantonS	HY	5	2	5	257.633
CantonS	HY	5	2	5	345.771
CantonS	HY	5	2	5	347.965
CantonS	HY	5	2	5	274.384
CantonS	HY	5	2	5	305.89
CantonS	HY	5	2	5	181.66
CantonS	HY	5	2	5	232.508
CantonS	HY	5	2	6	368.902
CantonS	HY	5	2	6	310.277
CantonS	HY	5	2	6	249.059
CantonS	HY	5	2	6	246.068
CantonS	HY	5	2	6	428.924
CantonS	HY	5	2	6	267.205
CantonS	HY	5	2	6	348.164
CantonS	HY	5	2	6	215.359
CantonS	HY	5	2	6	242.479
CantonS	HY	5	2	6	219.347
CantonS	HY	5	2	6	304.295
CantonS	HY	5	2	6	360.527
CantonS	HY	5	2	6	507.889
CantonS	HY	5	2	6	306.488
CantonS	HY	5	2	6	302.699
CantonS	HY	5	2	6	368.703
CantonS	HY	5	2	6	297.315
CantonS	HY	5	2	6	336
CantonS	HY	5	2	6	342.78
CantonS	HY	5	2	6	275.381
CantonS	HY	5	2	6	346.369
CantonS	HY	5	2	6	309.28
CantonS	HY	5	2	6	331.414
CantonS	HY	5	2	6	294.125
CantonS	HY	5	2	6	342.182
CantonS	HY	5	2	6	554.55
CantonS	HY	5	2	6	245.47
CantonS	HY	5	2	6	239.288
CantonS	HY	5	2	6	329.42
CantonS	HY	5	2	6	242.479
CantonS	HY	5	2	7	163.514
CantonS	HY	5	2	7	240.086
CantonS	HY	5	2	7	230.714
CantonS	HY	5	2	7	135.796
CantonS	HY	5	2	7	150.153
CantonS	HY	5	2	7	258.431
CantonS	HY	5	2	7	207.383
CantonS	HY	5	2	7	335.402
CantonS	HY	5	2	7	241.681
CantonS	HY	5	2	7	145.368
CantonS	HY	5	2	7	203.794
CantonS	HY	5	2	7	237.892
CantonS	HY	5	2	7	240.485
CantonS	HY	5	2	7	194.82
CantonS	HY	5	2	7	161.121
CantonS	HY	5	2	7	185.648
CantonS	HY	5	2	7	164.511
CantonS	HY	5	2	7	154.141
CantonS	HY	5	2	7	171.49
CantonS	HY	5	2	7	219.946
CantonS	HY	5	2	7	241.482
CantonS	HY	5	2	7	141.778
CantonS	HY	5	2	7	216.755
CantonS	HY	5	2	7	229.318
CantonS	HY	5	2	7	280.565
CantonS	HY	5	2	7	146.165
CantonS	HY	5	2	7	195.02
CantonS	HY	5	2	7	135.796
CantonS	HY	5	2	7	193.225
CantonS	HY	5	2	7	254.642
CantonS	HY	5	3	1	476.383
CantonS	HY	5	3	1	306.089
CantonS	HY	5	3	1	212.966
CantonS	HY	5	3	1	247.863
CantonS	HY	5	3	1	333.607
CantonS	HY	5	3	1	309.479
CantonS	HY	5	3	1	561.33
CantonS	HY	5	3	1	211.77
CantonS	HY	5	3	1	221.142
CantonS	HY	5	3	1	316.857
CantonS	HY	5	3	1	304.693
CantonS	HY	5	3	1	211.371
CantonS	HY	5	3	1	199.008
CantonS	HY	5	3	1	356.739
CantonS	HY	5	3	1	443.68
CantonS	HY	5	3	1	201.6
CantonS	HY	5	3	1	281.762
CantonS	HY	5	3	1	363.518
CantonS	HY	5	3	1	395.822
CantonS	HY	5	3	1	347.167
CantonS	HY	5	3	1	388.644
CantonS	HY	5	3	1	351.953
CantonS	HY	5	3	1	125.427
CantonS	HY	5	3	1	281.762
CantonS	HY	5	3	1	618.56
CantonS	HY	5	3	1	205.588
CantonS	HY	5	3	1	314.066
CantonS	HY	5	3	1	475.585
CantonS	HY	5	3	1	373.289
CantonS	HY	5	3	1	351.753
CantonS	HY	5	3	2	172.686
CantonS	HY	5	3	2	175.079
CantonS	HY	5	3	2	198.011
CantonS	HY	5	3	2	195.419
CantonS	HY	5	3	2	222.737
CantonS	HY	5	3	2	137.192
CantonS	HY	5	3	2	169.097
CantonS	HY	5	3	2	211.969
CantonS	HY	5	3	2	176.076
CantonS	HY	5	3	2	136.793
CantonS	HY	5	3	2	156.335
CantonS	HY	5	3	2	147.362
CantonS	HY	5	3	2	140.582
CantonS	HY	5	3	2	142.576
CantonS	HY	5	3	2	290.735
CantonS	HY	5	3	2	191.63
CantonS	HY	5	3	2	150.751
CantonS	HY	5	3	2	133.204
CantonS	HY	5	3	2	243.276
CantonS	HY	5	3	2	136.594
CantonS	HY	5	3	2	115.456
CantonS	HY	5	3	2	150.552
CantonS	HY	5	3	2	201.6
CantonS	HY	5	3	2	189.835
CantonS	HY	5	3	2	156.734
CantonS	HY	5	3	2	193.624
CantonS	HY	5	3	2	262.818
CantonS	HY	5	3	2	152.147
CantonS	HY	5	3	2	202.996
CantonS	HY	5	3	2	181.261
CantonS	HY	5	3	3	528.428
CantonS	HY	5	3	3	252.25
CantonS	HY	5	3	3	506.892
CantonS	HY	5	3	3	334.604
CantonS	HY	5	3	3	338.393
CantonS	HY	5	3	3	307.884
CantonS	HY	5	3	3	459.832
CantonS	HY	5	3	3	361.126
CantonS	HY	5	3	3	445.873
CantonS	HY	5	3	3	388.045
CantonS	HY	5	3	3	247.464
CantonS	HY	5	3	3	251.651
CantonS	HY	5	3	3	372.093
CantonS	HY	5	3	3	299.309
CantonS	HY	5	3	3	440.091
CantonS	HY	5	3	3	363.718
CantonS	HY	5	3	3	368.304
CantonS	HY	5	3	3	429.123
CantonS	HY	5	3	3	461.028
CantonS	HY	5	3	3	385.653
CantonS	HY	5	3	3	372.292
CantonS	HY	5	3	3	313.268
CantonS	HY	5	3	3	529.425
CantonS	HY	5	3	3	309.28
CantonS	HY	5	3	3	269.199
CantonS	HY	5	3	3	469.603
CantonS	HY	5	3	3	527.431
CantonS	HY	5	3	3	381.266
CantonS	HY	5	3	3	369.102
CantonS	HY	5	3	3	522.645
CantonS	HY	5	3	4	255.041
CantonS	HY	5	3	4	193.624
CantonS	HY	5	3	4	206.785
CantonS	HY	5	3	4	193.624
CantonS	HY	5	3	4	190.832
CantonS	HY	5	3	4	161.918
CantonS	HY	5	3	4	199.207
CantonS	HY	5	3	4	171.689
CantonS	HY	5	3	4	185.448
CantonS	HY	5	3	4	192.826
CantonS	HY	5	3	4	155.138
CantonS	HY	5	3	4	164.311
CantonS	HY	5	3	4	209.178
CantonS	HY	5	3	4	160.921
CantonS	HY	5	3	4	165.508
CantonS	HY	5	3	4	277.574
CantonS	HY	5	3	4	366.31
CantonS	HY	5	3	4	268.601
CantonS	HY	5	3	4	343.378
CantonS	HY	5	3	4	354.745
CantonS	HY	5	3	4	252.449
CantonS	HY	5	3	4	226.127
CantonS	HY	5	3	4	242.08
CantonS	HY	5	3	4	292.131
CantonS	HY	5	3	4	191.829
CantonS	HY	5	3	4	188.24
CantonS	HY	5	3	4	160.921
CantonS	HY	5	3	4	187.243
CantonS	HY	5	3	4	202.597
CantonS	HY	5	3	4	169.097
CantonS	HY	5	3	5	691.941
CantonS	HY	5	3	5	356.14
CantonS	HY	5	3	5	360.926
CantonS	HY	5	3	5	396.819
CantonS	HY	5	3	5	446.272
CantonS	HY	5	3	5	462.424
CantonS	HY	5	3	5	326.828
CantonS	HY	5	3	5	418.355
CantonS	HY	5	3	5	338.593
CantonS	HY	5	3	5	487.549
CantonS	HY	5	3	5	657.643
CantonS	HY	5	3	5	355.343
CantonS	HY	5	3	5	292.729
CantonS	HY	5	3	5	499.514
CantonS	HY	5	3	5	449.263
CantonS	HY	5	3	5	370.099
CantonS	HY	5	3	5	440.29
CantonS	HY	5	3	5	465.814
CantonS	HY	5	3	5	485.555
CantonS	HY	5	3	5	340.387
CantonS	HY	5	3	5	350.756
CantonS	HY	5	3	5	434.707
CantonS	HY	5	3	5	416.162
CantonS	HY	5	3	5	423.34
CantonS	HY	5	3	5	446.87
CantonS	HY	5	3	5	309.08
CantonS	HY	5	3	5	690.147
CantonS	HY	5	3	5	227.324
CantonS	HY	5	3	5	335.602
CantonS	HY	5	3	5	436.501
CantonS	HY	5	3	6	441.486
CantonS	HY	5	3	6	335.003
CantonS	HY	5	3	6	320.845
CantonS	HY	5	3	6	188.838
CantonS	HY	5	3	6	169.895
CantonS	HY	5	3	6	318.253
CantonS	HY	5	3	6	347.765
CantonS	HY	5	3	6	235.499
CantonS	HY	5	3	6	173.085
CantonS	HY	5	3	6	171.689
CantonS	HY	5	3	6	242.479
CantonS	HY	5	3	6	374.486
CantonS	HY	5	3	6	324.036
CantonS	HY	5	3	6	262.22
CantonS	HY	5	3	6	272.788
CantonS	HY	5	3	6	229.517
CantonS	HY	5	3	6	298.911
CantonS	HY	5	3	6	214.562
CantonS	HY	5	3	6	260.226
CantonS	HY	5	3	6	200.005
CantonS	HY	5	3	6	249.657
CantonS	HY	5	3	6	234.103
CantonS	HY	5	3	6	213.764
CantonS	HY	5	3	6	405.394
CantonS	HY	5	3	6	189.237
CantonS	HY	5	3	6	193.425
CantonS	HY	5	3	6	224.931
CantonS	HY	5	3	6	222.339
CantonS	HY	5	3	6	309.878
CantonS	HY	5	3	6	196.017
CantonS	HY	5	3	7	542.785
CantonS	HY	5	3	7	303.098
CantonS	HY	5	3	7	288.94
CantonS	HY	5	3	7	210.574
CantonS	HY	5	3	7	369.301
CantonS	HY	5	3	7	242.08
CantonS	HY	5	3	7	534.809
CantonS	HY	5	3	7	371.495
CantonS	HY	5	3	7	428.525
CantonS	HY	5	3	7	302.101
CantonS	HY	5	3	7	294.923
CantonS	HY	5	3	7	435.704
CantonS	HY	5	3	7	327.027
CantonS	HY	5	3	7	306.488
CantonS	HY	5	3	7	307.685
CantonS	HY	5	3	7	613.973
CantonS	HY	5	3	7	230.913
CantonS	HY	5	3	7	433.111
CantonS	HY	5	3	7	299.509
CantonS	HY	5	3	7	454.049
CantonS	HY	5	3	7	576.684
CantonS	HY	5	3	7	485.755
CantonS	HY	5	3	7	761.534
CantonS	HY	5	3	7	507.291
CantonS	HY	5	3	7	285.55
CantonS	HY	5	3	7	452.653
CantonS	HY	5	3	7	279.568
CantonS	HY	5	3	7	438.695
CantonS	HY	5	3	7	301.902
CantonS	HY	5	3	7	559.336
