# Supplementary material for: Multiscale analysis reveals that diet-dependent midgut plasticity emerges from alterations in both stem cell niche coupling and enterocyte size
Source: eLife. 2021 Sep 23;10:e64125. doi: 10.7554/eLife.64125 (PMC8528489; doi:10.7554/eLife.64125)
Supplement: Figure 4—figure supplement 1—source data 1. [file elife-64125-fig4-figsupp1-data1.csv]

Line	Diet	Day	Dday	GS	Repeat	Total.L	Total.PH3
CantonS	HS	7	Shift Day 7	Growth	1	4789.664	7
CantonS	HS	7	Shift Day 7	Growth	2	4241.609	10
CantonS	HS	7	Shift Day 7	Growth	3	3958.094	1
CantonS	HS	7	Shift Day 7	Growth	1	4053.784
CantonS	HS	7	Shift Day 7	Growth	2	4072.87	26
CantonS	HS	7	Shift Day 7	Growth	3	3747.111	1
CantonS	HS	7	Shift Day 7	Growth	1	4018.92	8
CantonS	HS	7	Shift Day 7	Growth	2	4137.751	5
CantonS	HS	7	Shift Day 7	Growth	3	4070.747	10
CantonS	HS	7	Shift Day 7	Growth	1	4638.636	12
CantonS	HS	7	Shift Day 7	Growth	2	4512.308	34
CantonS	HS	7	Shift Day 7	Growth	3	3959.136	8
CantonS	HS	7	Shift Day 7	Growth	1	4812.703	8
CantonS	HS	7	Shift Day 7	Growth	2	5433.873	30
CantonS	HS	7	Shift Day 7	Growth	3	3171.904	9
CantonS	HS	7	Shift Day 7	Growth	2	4141.962	32
CantonS	HS	7	Shift Day 7	Growth	3	2991.387	20
CantonS	HS	7	Shift Day 7	Growth	2	4836.151	6
CantonS	HS	7	Shift Day 7	Growth	2	4930.397	2
CantonS	HS	7	Shift Day 7	Growth	2	4575.107	10
CantonS	HY	7	Shift Day 7	Shrinkage	1	5583.406	27
CantonS	HY	7	Shift Day 7	Shrinkage	2	6855.074	57
CantonS	HY	7	Shift Day 7	Shrinkage	3	4512.226	55
CantonS	HY	7	Shift Day 7	Shrinkage	1	5637.206	38
CantonS	HY	7	Shift Day 7	Shrinkage	2	7086.034	17
CantonS	HY	7	Shift Day 7	Shrinkage	3	5679.633	16
CantonS	HY	7	Shift Day 7	Shrinkage	1	7001.499	85
CantonS	HY	7	Shift Day 7	Shrinkage	2	6798.458	14
CantonS	HY	7	Shift Day 7	Shrinkage	3	5994.496	11
CantonS	HY	7	Shift Day 7	Shrinkage	1	5647.056	10
CantonS	HY	7	Shift Day 7	Shrinkage	2	5872.115	26
CantonS	HY	7	Shift Day 7	Shrinkage	3	6819.113	47
CantonS	HY	7	Shift Day 7	Shrinkage	1	6213.49	53
CantonS	HY	7	Shift Day 7	Shrinkage	2	7037.964	72
CantonS	HY	7	Shift Day 7	Shrinkage	3	5197.558	29
CantonS	HY	7	Shift Day 7	Shrinkage	2	5625.253	28
CantonS	HY	7	Shift Day 7	Shrinkage	3	6484.791	38
CantonS	HY	7	Shift Day 7	Shrinkage	2	7587.95	89
CantonS	HY	7	Shift Day 7	Shrinkage	3	5257.456	78
CantonS	HY	7	Shift Day 7	Shrinkage	2	4921.755	41
CantonS	HY	7	Shift Day 7	Shrinkage	3	6784.74	59
CantonS	HS	14	Shift Day 14	Growth	1	2842.664	6
CantonS	HS	14	Shift Day 14	Growth	2	4902.27	11
CantonS	HS	14	Shift Day 14	Growth	3	3073.931	6
CantonS	HS	14	Shift Day 14	Growth	1	3903.896	4
CantonS	HS	14	Shift Day 14	Growth	2	4240.423	14
CantonS	HS	14	Shift Day 14	Growth	3	3024.873	16
CantonS	HS	14	Shift Day 14	Growth	1	3012.841	4
CantonS	HS	14	Shift Day 14	Growth	2	4253.779	6
CantonS	HS	14	Shift Day 14	Growth	3	3000.916	2
CantonS	HS	14	Shift Day 14	Growth	1	2882.82	19
CantonS	HS	14	Shift Day 14	Growth	2	4945.087	14
CantonS	HS	14	Shift Day 14	Growth	3	2700.681	9
CantonS	HS	14	Shift Day 14	Growth	1	3440.731	12
CantonS	HS	14	Shift Day 14	Growth	2	4257.295	14
CantonS	HS	14	Shift Day 14	Growth	3	3253.938	8
CantonS	HS	14	Shift Day 14	Growth	1	3232.27	23
CantonS	HS	14	Shift Day 14	Growth	2	3604.298	14
CantonS	HS	14	Shift Day 14	Growth	3	3586.567
CantonS	HS	14	Shift Day 14	Growth	2	3109.597	26
CantonS	HS	14	Shift Day 14	Growth	3	3082.599	9
CantonS	HY	14	Shift Day 14	Shrinkage	1	8346.089
CantonS	HY	14	Shift Day 14	Shrinkage	2	5579.832	40
CantonS	HY	14	Shift Day 14	Shrinkage	3	5628.843	83
CantonS	HY	14	Shift Day 14	Shrinkage	1	5410.08
CantonS	HY	14	Shift Day 14	Shrinkage	2	7970.17	64
CantonS	HY	14	Shift Day 14	Shrinkage	3	6537.301	78
CantonS	HY	14	Shift Day 14	Shrinkage	1	6661.682
CantonS	HY	14	Shift Day 14	Shrinkage	2	5952.055	38
CantonS	HY	14	Shift Day 14	Shrinkage	3	5275.329	52
CantonS	HY	14	Shift Day 14	Shrinkage	1
CantonS	HY	14	Shift Day 14	Shrinkage	2	7134.385	94
CantonS	HY	14	Shift Day 14	Shrinkage	3	6041.014	57
CantonS	HY	14	Shift Day 14	Shrinkage	1	6642.954
CantonS	HY	14	Shift Day 14	Shrinkage	2	6477.296	64
CantonS	HY	14	Shift Day 14	Shrinkage	3	5932.268	22
CantonS	HY	14	Shift Day 14	Shrinkage	1	7294.244
CantonS	HY	14	Shift Day 14	Shrinkage	2	6879.108	61
CantonS	HY	14	Shift Day 14	Shrinkage	3	6325.914	23
CantonS	HY	14	Shift Day 14	Shrinkage	2	6177.377	38
CantonS	HY	14	Shift Day 14	Shrinkage	3	5483.705	76
CantonS	HY	14	Shift Day 14	Shrinkage	2	7302.461	35
CantonS	HY	14	Shift Day 14	Shrinkage	3	5585.11	22
CantonS	HY	14	Shift Day 14	Shrinkage	3	7149.204	22
CantonS	HY	14	Shift Day 14	Shrinkage	3	5622.361	74
CantonS	HY	14	Shift Day 14	Shrinkage	3	6744.856	63
CantonS	HS	21	Shift Day 21	Growth	1	2435.937	10
CantonS	HS	21	Shift Day 21	Growth	2	3172.825	15
CantonS	HS	21	Shift Day 21	Growth	3	3188.846	20
CantonS	HS	21	Shift Day 21	Growth	1	4609.498	8
CantonS	HS	21	Shift Day 21	Growth	2	3239.463	17
CantonS	HS	21	Shift Day 21	Growth	3	3232.557	4
CantonS	HS	21	Shift Day 21	Growth	1	3033.569	6
CantonS	HS	21	Shift Day 21	Growth	2	2744.507	2
CantonS	HS	21	Shift Day 21	Growth	3	1974.441	19
CantonS	HS	21	Shift Day 21	Growth	1	4698.051	16
CantonS	HS	21	Shift Day 21	Growth	2	3590.867	26
CantonS	HS	21	Shift Day 21	Growth	3	2910.845	7
CantonS	HS	21	Shift Day 21	Growth	1	4748.826	16
CantonS	HS	21	Shift Day 21	Growth	2	3652.417	15
CantonS	HS	21	Shift Day 21	Growth	3	2747.422	12
CantonS	HS	21	Shift Day 21	Growth	1	3177.883	10
CantonS	HS	21	Shift Day 21	Growth	2	3842.355	23
CantonS	HS	21	Shift Day 21	Growth	3	2855.93	17
CantonS	HS	21	Shift Day 21	Growth	1	3731.385	5
CantonS	HS	21	Shift Day 21	Growth	2	3223.482	19
CantonS	HS	21	Shift Day 21	Growth	3	3213.011	17
CantonS	HS	21	Shift Day 21	Growth	2	4467.749	35
CantonS	HS	21	Shift Day 21	Growth	3	3030.071	23
CantonS	HS	21	Shift Day 21	Growth	2	3076.368	17
CantonS	HS	21	Shift Day 21	Growth	3	4078.312	7
CantonS	HS	21	Shift Day 21	Growth	2	2855.791	32
CantonS	HS	21	Shift Day 21	Growth	3	2433.75
CantonS	HS	21	Shift Day 21	Growth	2	3426.597	20
CantonS	HY	21	Shift Day 21	Shrinkage	1	5804.012	35
CantonS	HY	21	Shift Day 21	Shrinkage	2	5343.141	55
CantonS	HY	21	Shift Day 21	Shrinkage	3	6125.522	97
CantonS	HY	21	Shift Day 21	Shrinkage	1	8597.91	64
CantonS	HY	21	Shift Day 21	Shrinkage	2	6573.183	49
CantonS	HY	21	Shift Day 21	Shrinkage	3	7006.907	124
CantonS	HY	21	Shift Day 21	Shrinkage	1	6370.23	85
CantonS	HY	21	Shift Day 21	Shrinkage	2	4490.2	52
CantonS	HY	21	Shift Day 21	Shrinkage	3	4413.13	68
CantonS	HY	21	Shift Day 21	Shrinkage	1	6057.223	27
CantonS	HY	21	Shift Day 21	Shrinkage	2	7104.009	73
CantonS	HY	21	Shift Day 21	Shrinkage	3	6386.389	90
CantonS	HY	21	Shift Day 21	Shrinkage	1	6010.183	90
CantonS	HY	21	Shift Day 21	Shrinkage	2	6403.507	116
CantonS	HY	21	Shift Day 21	Shrinkage	3	6233.655	58
CantonS	HY	21	Shift Day 21	Shrinkage	1	5512.796	54
CantonS	HY	21	Shift Day 21	Shrinkage	2	4957.512	32
CantonS	HY	21	Shift Day 21	Shrinkage	3	5504.573	70
CantonS	HY	21	Shift Day 21	Shrinkage	1	6369.927	82
CantonS	HY	21	Shift Day 21	Shrinkage	2	5784.571	76
CantonS	HY	21	Shift Day 21	Shrinkage	3	4569.145	45
CantonS	HY	21	Shift Day 21	Shrinkage	1	6336.667	64
CantonS	HY	21	Shift Day 21	Shrinkage	2	7796.794	93
CantonS	HY	21	Shift Day 21	Shrinkage	3	5800.677	78
CantonS	HY	21	Shift Day 21	Shrinkage	2	7405.501	68
CantonS	HS	28	Shift Day 28	Growth	1	3122.959	18
CantonS	HS	28	Shift Day 28	Growth	2	4475.141	21
CantonS	HS	28	Shift Day 28	Growth	3	2650.689	9
CantonS	HS	28	Shift Day 28	Growth	1	3607.915	15
CantonS	HS	28	Shift Day 28	Growth	2	3863.125	28
CantonS	HS	28	Shift Day 28	Growth	3	2860.149	7
CantonS	HS	28	Shift Day 28	Growth	1	2688.994	20
CantonS	HS	28	Shift Day 28	Growth	2	3543.482	9
CantonS	HS	28	Shift Day 28	Growth	3	2286.924	12
CantonS	HS	28	Shift Day 28	Growth	1	2276.126	0
CantonS	HS	28	Shift Day 28	Growth	2	2617.886	16
CantonS	HS	28	Shift Day 28	Growth	3	3204.248	10
CantonS	HS	28	Shift Day 28	Growth	1	3501.149	4
CantonS	HS	28	Shift Day 28	Growth	2	3833.956
CantonS	HS	28	Shift Day 28	Growth	3	2430.168	12
CantonS	HS	28	Shift Day 28	Growth	1	3355.951	16
CantonS	HS	28	Shift Day 28	Growth	2	3666.524	13
CantonS	HS	28	Shift Day 28	Growth	1	2234.244	4
CantonS	HS	28	Shift Day 28	Growth	2	2520.752	9
CantonS	HS	28	Shift Day 28	Growth	1	4587.666
CantonS	HS	28	Shift Day 28	Growth	2	3645.16	9
CantonS	HY	28	Shift Day 28	Shrinkage	1	6976.429	68
CantonS	HY	28	Shift Day 28	Shrinkage	2	6630.365	104
CantonS	HY	28	Shift Day 28	Shrinkage	3	5505.4	71
CantonS	HY	28	Shift Day 28	Shrinkage	1	6847.523	71
CantonS	HY	28	Shift Day 28	Shrinkage	2	6614.333	114
CantonS	HY	28	Shift Day 28	Shrinkage	3	5522.475	62
CantonS	HY	28	Shift Day 28	Shrinkage	1	8590.255	90
CantonS	HY	28	Shift Day 28	Shrinkage	2	8701.98	105
CantonS	HY	28	Shift Day 28	Shrinkage	3	3883.816	66
CantonS	HY	28	Shift Day 28	Shrinkage	1	6523.967	73
CantonS	HY	28	Shift Day 28	Shrinkage	2	8651.709	128
CantonS	HY	28	Shift Day 28	Shrinkage	3	5469.406	63
CantonS	HY	28	Shift Day 28	Shrinkage	1	7056.798	95
CantonS	HY	28	Shift Day 28	Shrinkage	2	7409.454	95
CantonS	HY	28	Shift Day 28	Shrinkage	3	6421.036	121
CantonS	HY	28	Shift Day 28	Shrinkage	1	7958.285	88
CantonS	HY	28	Shift Day 28	Shrinkage	2	7683.674	104
CantonS	HY	28	Shift Day 28	Shrinkage	3	8677.933	118
CantonS	HY	28	Shift Day 28	Shrinkage	1	7374.385	124
CantonS	HY	28	Shift Day 28	Shrinkage	2	8382.491	104
CantonS	HY	28	Shift Day 28	Shrinkage	3	6545.851	96
CantonS	HY	28	Shift Day 28	Shrinkage	2	7704.764	90
CantonS	HY	28	Shift Day 28	Shrinkage	3	5400.437	123
CantonS	HY	28	Shift Day 28	Shrinkage	2	7810.818	83
CantonS	HY	28	Shift Day 28	Shrinkage	3	6715.196	98
CantonS	HY	28	Shift Day 28	Shrinkage	2	6415.42	76
