# Supplementary material for: Multiscale analysis reveals that diet-dependent midgut plasticity emerges from alterations in both stem cell niche coupling and enterocyte size
Source: eLife. 2021 Sep 23;10:e64125. doi: 10.7554/eLife.64125 (PMC8528489; doi:10.7554/eLife.64125)
Supplement: Figure 4—figure supplement 1—source data 2. [file elife-64125-fig4-figsupp1-data2.csv]

Line	Diet	Day	Dday	GS	Repeat	Total.L	Total.PH3
CantonS	HS	7	Shift Day 7	Growth	1	4789.664	7
CantonS	HS	7	Shift Day 7	Growth	2	4241.609	10
CantonS	HS	7	Shift Day 7	Growth	3	3958.094	1
CantonS	HS	7	Shift Day 7	Growth	1	4053.784
CantonS	HS	7	Shift Day 7	Growth	2	4072.87	26
CantonS	HS	7	Shift Day 7	Growth	3	3747.111	1
CantonS	HS	7	Shift Day 7	Growth	1	4018.92	8
CantonS	HS	7	Shift Day 7	Growth	2	4137.751	5
CantonS	HS	7	Shift Day 7	Growth	3	4070.747	10
CantonS	HS	7	Shift Day 7	Growth	1	4638.636	12
CantonS	HS	7	Shift Day 7	Growth	2	4512.308	34
CantonS	HS	7	Shift Day 7	Growth	3	3959.136	8
CantonS	HS	7	Shift Day 7	Growth	1	4812.703	8
CantonS	HS	7	Shift Day 7	Growth	2	5433.873	30
CantonS	HS	7	Shift Day 7	Growth	3	3171.904	9
CantonS	HS	7	Shift Day 7	Growth	2	4141.962	32
CantonS	HS	7	Shift Day 7	Growth	3	2991.387	20
CantonS	HS	7	Shift Day 7	Growth	2	4836.151	6
CantonS	HS	7	Shift Day 7	Growth	2	4930.397	2
CantonS	HS	7	Shift Day 7	Growth	2	4575.107	10
CantonS	HS	14	Shift Day 14	Growth	1	2842.664	6
CantonS	HS	14	Shift Day 14	Growth	2	4902.27	11
CantonS	HS	14	Shift Day 14	Growth	3	3073.931	6
CantonS	HS	14	Shift Day 14	Growth	1	3903.896	4
CantonS	HS	14	Shift Day 14	Growth	2	4240.423	14
CantonS	HS	14	Shift Day 14	Growth	3	3024.873	16
CantonS	HS	14	Shift Day 14	Growth	1	3012.841	4
CantonS	HS	14	Shift Day 14	Growth	2	4253.779	6
CantonS	HS	14	Shift Day 14	Growth	3	3000.916	2
CantonS	HS	14	Shift Day 14	Growth	1	2882.82	19
CantonS	HS	14	Shift Day 14	Growth	2	4945.087	14
CantonS	HS	14	Shift Day 14	Growth	3	2700.681	9
CantonS	HS	14	Shift Day 14	Growth	1	3440.731	12
CantonS	HS	14	Shift Day 14	Growth	2	4257.295	14
CantonS	HS	14	Shift Day 14	Growth	3	3253.938	8
CantonS	HS	14	Shift Day 14	Growth	1	3232.27	23
CantonS	HS	14	Shift Day 14	Growth	2	3604.298	14
CantonS	HS	14	Shift Day 14	Growth	3	3586.567
CantonS	HS	14	Shift Day 14	Growth	2	3109.597	26
CantonS	HS	14	Shift Day 14	Growth	3	3082.599	9
CantonS	HStoHY	14	Shift Day 7	Growth	1		54
CantonS	HStoHY	14	Shift Day 7	Growth	2	5804.908	62
CantonS	HStoHY	14	Shift Day 7	Growth	3	4579.656	8
CantonS	HStoHY	14	Shift Day 7	Growth	1	4927.058	61
CantonS	HStoHY	14	Shift Day 7	Growth	2	6003.668	76
CantonS	HStoHY	14	Shift Day 7	Growth	3	4732.562	5
CantonS	HStoHY	14	Shift Day 7	Growth	1	5738.992	25
CantonS	HStoHY	14	Shift Day 7	Growth	2	6242.563	31
CantonS	HStoHY	14	Shift Day 7	Growth	3	5179.418	14
CantonS	HStoHY	14	Shift Day 7	Growth	1	6627.745	26
CantonS	HStoHY	14	Shift Day 7	Growth	2	6730.528	59
CantonS	HStoHY	14	Shift Day 7	Growth	3	5683.746	19
CantonS	HStoHY	14	Shift Day 7	Growth	1	5581.437	40
CantonS	HStoHY	14	Shift Day 7	Growth	2	5821.784	61
CantonS	HStoHY	14	Shift Day 7	Growth	3	5107.373	12
CantonS	HStoHY	14	Shift Day 7	Growth	1	5477.871	32
CantonS	HStoHY	14	Shift Day 7	Growth	2	5574.851	52
CantonS	HStoHY	14	Shift Day 7	Growth	3	5100.194	9
CantonS	HStoHY	14	Shift Day 7	Growth	1	6539.187	41
CantonS	HStoHY	14	Shift Day 7	Growth	2	6459.558	72
CantonS	HStoHY	14	Shift Day 7	Growth	3	5040.977	11
CantonS	HStoHY	14	Shift Day 7	Growth	2	6004.879	61
CantonS	HStoHY	14	Shift Day 7	Growth	3		30
CantonS	HStoHY	14	Shift Day 7	Growth	2	4833.851	77
CantonS	HStoHY	14	Shift Day 7	Growth	3	5802.262	23
CantonS	HStoHY	14	Shift Day 7	Growth	2	5698.641	58
CantonS	HStoHY	14	Shift Day 7	Growth	3	4252.807	35
CantonS	HS	21	Shift Day 21	Growth	1	2435.937	10
CantonS	HS	21	Shift Day 21	Growth	2	3172.825	15
CantonS	HS	21	Shift Day 21	Growth	3	3188.846	20
CantonS	HS	21	Shift Day 21	Growth	1	4609.498	8
CantonS	HS	21	Shift Day 21	Growth	2	3239.463	17
CantonS	HS	21	Shift Day 21	Growth	3	3232.557	4
CantonS	HS	21	Shift Day 21	Growth	1	3033.569	6
CantonS	HS	21	Shift Day 21	Growth	2	2744.507	2
CantonS	HS	21	Shift Day 21	Growth	3	1974.441	19
CantonS	HS	21	Shift Day 21	Growth	1	4698.051	16
CantonS	HS	21	Shift Day 21	Growth	2	3590.867	26
CantonS	HS	21	Shift Day 21	Growth	3	2910.845	7
CantonS	HS	21	Shift Day 21	Growth	1	4748.826	16
CantonS	HS	21	Shift Day 21	Growth	2	3652.417	15
CantonS	HS	21	Shift Day 21	Growth	3	2747.422	12
CantonS	HS	21	Shift Day 21	Growth	1	3177.883	10
CantonS	HS	21	Shift Day 21	Growth	2	3842.355	23
CantonS	HS	21	Shift Day 21	Growth	3	2855.93	17
CantonS	HS	21	Shift Day 21	Growth	1	3731.385	5
CantonS	HS	21	Shift Day 21	Growth	2	3223.482	19
CantonS	HS	21	Shift Day 21	Growth	3	3213.011	17
CantonS	HS	21	Shift Day 21	Growth	2	4467.749	35
CantonS	HS	21	Shift Day 21	Growth	3	3030.071	23
CantonS	HS	21	Shift Day 21	Growth	2	3076.368	17
CantonS	HS	21	Shift Day 21	Growth	3	4078.312	7
CantonS	HS	21	Shift Day 21	Growth	2	2855.791	32
CantonS	HS	21	Shift Day 21	Growth	3	2433.75
CantonS	HS	21	Shift Day 21	Growth	2	3426.597	20
CantonS	HStoHY	21	Shift Day 14	Growth	1	6123.955	15
CantonS	HStoHY	21	Shift Day 14	Growth	2	4766.328	10
CantonS	HStoHY	21	Shift Day 14	Growth	3	4752.642	48
CantonS	HStoHY	21	Shift Day 14	Growth	1	5000.912	8
CantonS	HStoHY	21	Shift Day 14	Growth	2	6414.924	33
CantonS	HStoHY	21	Shift Day 14	Growth	3	4878.449	37
CantonS	HStoHY	21	Shift Day 14	Growth	1	5693.925	54
CantonS	HStoHY	21	Shift Day 14	Growth	2	5453.456	42
CantonS	HStoHY	21	Shift Day 14	Growth	3	5015.176	25
CantonS	HStoHY	21	Shift Day 14	Growth	1	6286.873	60
CantonS	HStoHY	21	Shift Day 14	Growth	2	5323.563	14
CantonS	HStoHY	21	Shift Day 14	Growth	3	5051.978	57
CantonS	HStoHY	21	Shift Day 14	Growth	1	5535.42	53
CantonS	HStoHY	21	Shift Day 14	Growth	2	6621.804	38
CantonS	HStoHY	21	Shift Day 14	Growth	3	4562.02	52
CantonS	HStoHY	21	Shift Day 14	Growth	2	4665.39	30
CantonS	HStoHY	21	Shift Day 14	Growth	3	4905.597	26
CantonS	HStoHY	21	Shift Day 14	Growth	2	5038.132	46
CantonS	HStoHY	21	Shift Day 14	Growth	2	5543.209	24
CantonS	HStoHY	21	Shift Day 14	Growth	2	5600.673	15
CantonS	HStoHY	21	Shift Day 14	Growth	2	4758.067	22
CantonS	HStoHY	28	Shift Day 21	Growth	1	4652.169	81
CantonS	HStoHY	28	Shift Day 21	Growth	2	6244.501	48
CantonS	HStoHY	28	Shift Day 21	Growth	3	5781.378	36
CantonS	HStoHY	28	Shift Day 21	Growth	1	4625.582	44
CantonS	HStoHY	28	Shift Day 21	Growth	2	6153.46	17
CantonS	HStoHY	28	Shift Day 21	Growth	3	3714.956	61
CantonS	HStoHY	28	Shift Day 21	Growth	1	5854.951	110
CantonS	HStoHY	28	Shift Day 21	Growth	2	7382.53	49
CantonS	HStoHY	28	Shift Day 21	Growth	3	3412.234	44
CantonS	HStoHY	28	Shift Day 21	Growth	1	5719.57	52
CantonS	HStoHY	28	Shift Day 21	Growth	2	7169.285	78
CantonS	HStoHY	28	Shift Day 21	Growth	3	3862.868	10
CantonS	HStoHY	28	Shift Day 21	Growth	1	5966.409	101
CantonS	HStoHY	28	Shift Day 21	Growth	2	6442.581	36
CantonS	HStoHY	28	Shift Day 21	Growth	3	5232.134	44
CantonS	HStoHY	28	Shift Day 21	Growth	1	4942.469	45
CantonS	HStoHY	28	Shift Day 21	Growth	2	6483.872	34
CantonS	HStoHY	28	Shift Day 21	Growth	3	4991.011	81
CantonS	HStoHY	28	Shift Day 21	Growth	1	3892.595	73
CantonS	HStoHY	28	Shift Day 21	Growth	2	6347.602	35
CantonS	HStoHY	28	Shift Day 21	Growth	3	3968.7	51
CantonS	HStoHY	28	Shift Day 21	Growth	1	4748.717	39
CantonS	HStoHY	28	Shift Day 21	Growth	2	5835.864	42
CantonS	HStoHY	28	Shift Day 21	Growth	1	6449.153	49
CantonS	HStoHY	28	Shift Day 21	Growth	2		54
CantonS	HStoHY	28	Shift Day 21	Growth	1	6536.105	35
CantonS	HStoHY	28	Shift Day 21	Growth	1	6592.191	74
CantonS	HStoHY	28	Shift Day 21	Growth	1	7568.187	46
