# Supplementary material for: Multiscale analysis reveals that diet-dependent midgut plasticity emerges from alterations in both stem cell niche coupling and enterocyte size
Source: eLife. 2021 Sep 23;10:e64125. doi: 10.7554/eLife.64125 (PMC8528489; doi:10.7554/eLife.64125)
Supplement: Figure 4—figure supplement 1—source data 5. [file elife-64125-fig4-figsupp1-data5.csv]

Line	Repeat	GutNumber	Yeast in Diet	Sucrose in Diet	Absorbance	Sucrose ingested	Yeast ingested	Ph3.Total	concatenate	Calories ingested
CantonS	1	1	0	17.99833333	1.452	26.13358	0	1	A	100.188
CantonS	1	2	0	17.99833333	1.452	26.13358	0	4	A	100.188
CantonS	1	3	0	17.99833333	1.452	26.13358	0	0	A	100.188
CantonS	1	4	0	17.99833333	1.452	26.13358	0	3	A	100.188
CantonS	1	5	0	17.99833333	1.452	26.13358	0	0	A	100.188
CantonS	1	6	0	17.99833333	1.452	26.13358	0	5	A	100.188
CantonS	1	7	0	17.99833333	1.452	26.13358	0	4	A	100.188
CantonS	1	8	0	17.99833333	1.452	26.13358	0	5	A	100.188
CantonS	1	9	0	17.99833333	1.452	26.13358	0	0	A	100.188
CantonS	2	1	0	17.99833333	1.452	26.13358	0	1	A	100.188
CantonS	2	2	0	17.99833333	1.452	26.13358	0	1	A	100.188
CantonS	2	3	0	17.99833333	1.452	26.13358	0	0	A	100.188
CantonS	2	4	0	17.99833333	1.452	26.13358	0	3	A	100.188
CantonS	2	5	0	17.99833333	1.452	26.13358	0	8	A	100.188
CantonS	2	6	0	17.99833333	1.452	26.13358	0	2	A	100.188
CantonS	2	7	0	17.99833333	1.452	26.13358	0	10	A	100.188
CantonS	2	8	0	17.99833333	1.452	26.13358	0	4	A	100.188
CantonS	2	9	0	17.99833333	1.452	26.13358	0	5	A	100.188
CantonS	3	1	0	17.99833333	1.452	26.13358	0	0	A	100.188
CantonS	3	2	0	17.99833333	1.452	26.13358	0	0	A	100.188
CantonS	3	3	0	17.99833333	1.452	26.13358	0	2	A	100.188
CantonS	3	4	0	17.99833333	1.452	26.13358	0	1	A	100.188
CantonS	3	5	0	17.99833333	1.452	26.13358	0	4	A	100.188
CantonS	3	6	0	17.99833333	1.452	26.13358	0	5	A	100.188
CantonS	3	7	0	17.99833333	1.452	26.13358	0	0	A	100.188
CantonS	1	1	0	179.9833333	0.785	141.2869167	0	6	B	546.6791025
CantonS	1	2	0	179.9833333	0.785	141.2869167	0	8	B	546.6791025
CantonS	1	3	0	179.9833333	0.785	141.2869167	0	0	B	546.6791025
CantonS	1	4	0	179.9833333	0.785	141.2869167	0	7	B	546.6791025
CantonS	1	5	0	179.9833333	0.785	141.2869167	0	7	B	546.6791025
CantonS	1	6	0	179.9833333	0.785	141.2869167	0	21	B	546.6791025
CantonS	1	7	0	179.9833333	0.785	141.2869167	0	12	B	546.6791025
CantonS	1	8	0	179.9833333	0.785	141.2869167	0	7	B	546.6791025
CantonS	1	9	0	179.9833333	0.785	141.2869167	0	4	B	546.6791025
CantonS	2	1	0	179.9833333	0.785	141.2869167	0	17	B	546.6791025
CantonS	2	2	0	179.9833333	0.785	141.2869167	0	11	B	546.6791025
CantonS	2	3	0	179.9833333	0.785	141.2869167	0	5	B	546.6791025
CantonS	2	4	0	179.9833333	0.785	141.2869167	0	2	B	546.6791025
CantonS	2	5	0	179.9833333	0.785	141.2869167	0	7	B	546.6791025
CantonS	2	6	0	179.9833333	0.785	141.2869167	0	23	B	546.6791025
CantonS	2	7	0	179.9833333	0.785	141.2869167	0	3	B	546.6791025
CantonS	2	8	0	179.9833333	0.785	141.2869167	0	10	B	546.6791025
CantonS	2	9	0	179.9833333	0.785	141.2869167	0	3	B	546.6791025
CantonS	3	1	0	179.9833333	0.785	141.2869167	0	15	B	546.6791025
CantonS	3	2	0	179.9833333	0.785	141.2869167	0	0	B	546.6791025
CantonS	3	3	0	179.9833333	0.785	141.2869167	0	0	B	546.6791025
CantonS	3	4	0	179.9833333	0.785	141.2869167	0	1	B	546.6791025
CantonS	3	5	0	179.9833333	0.785	141.2869167	0	11	B	546.6791025
CantonS	3	6	0	179.9833333	0.785	141.2869167	0	3	B	546.6791025
CantonS	3	7	0	179.9833333	0.785	141.2869167	0	5	B	546.6791025
CantonS	1	1	0	274	0.579	158.646	0	4	C	613.96002
CantonS	1	2	0	274	0.579	158.646	0	10	C	613.96002
CantonS	1	3	0	274	0.579	158.646	0	11	C	613.96002
CantonS	1	4	0	274	0.579	158.646	0	4	C	613.96002
CantonS	1	5	0	274	0.579	158.646	0	35	C	613.96002
CantonS	1	6	0	274	0.579	158.646	0	2	C	613.96002
CantonS	1	7	0	274	0.579	158.646	0	5	C	613.96002
CantonS	1	8	0	274	0.579	158.646	0	0	C	613.96002
CantonS	1	9	0	274	0.579	158.646	0	8	C	613.96002
CantonS	2	1	0	274	0.579	158.646	0	8	C	613.96002
CantonS	2	2	0	274	0.579	158.646	0	4	C	613.96002
CantonS	2	3	0	274	0.579	158.646	0	7	C	613.96002
CantonS	2	4	0	274	0.579	158.646	0	5	C	613.96002
CantonS	2	5	0	274	0.579	158.646	0	3	C	613.96002
CantonS	2	6	0	274	0.579	158.646	0	13	C	613.96002
CantonS	2	7	0	274	0.579	158.646	0	2	C	613.96002
CantonS	2	8	0	274	0.579	158.646	0	4	C	613.96002
CantonS	2	9	0	274	0.579	158.646	0	9	C	613.96002
CantonS	3	1	0	274	0.579	158.646	0	5	C	613.96002
CantonS	3	2	0	274	0.579	158.646	0	24	C	613.96002
CantonS	3	3	0	274	0.579	158.646	0	19	C	613.96002
CantonS	3	4	0	274	0.579	158.646	0	34	C	613.96002
CantonS	3	5	0	274	0.579	158.646	0	0	C	613.96002
CantonS	3	6	0	274	0.579	158.646	0	21	C	613.96002
CantonS	3	7	0	274	0.579	158.646	0	2	C	613.96002
CantonS	1	1	0	79.32358715	1.139	90.34956576	0	29	D	348.534
CantonS	1	2	0	79.32358715	1.139	90.34956576	0	1	D	348.534
CantonS	1	3	0	79.32358715	1.139	90.34956576	0	4	D	348.534
CantonS	1	4	0	79.32358715	1.139	90.34956576	0	7	D	348.534
CantonS	1	5	0	79.32358715	1.139	90.34956576	0	5	D	348.534
CantonS	1	6	0	79.32358715	1.139	90.34956576	0	6	D	348.534
CantonS	1	7	0	79.32358715	1.139	90.34956576	0	44	D	348.534
CantonS	1	8	0	79.32358715	1.139	90.34956576	0	2	D	348.534
CantonS	1	9	0	79.32358715	1.139	90.34956576	0	0	D	348.534
CantonS	2	1	0	79.32358715	1.139	90.34956576	0	7	D	348.534
CantonS	2	2	0	79.32358715	1.139	90.34956576	0	2	D	348.534
CantonS	2	3	0	79.32358715	1.139	90.34956576	0	10	D	348.534
CantonS	2	4	0	79.32358715	1.139	90.34956576	0	0	D	348.534
CantonS	2	5	0	79.32358715	1.139	90.34956576	0	1	D	348.534
CantonS	2	6	0	79.32358715	1.139	90.34956576	0	14	D	348.534
CantonS	3	1	0	79.32358715	1.139	90.34956576	0	0	D	348.534
CantonS	3	2	0	79.32358715	1.139	90.34956576	0	5	D	348.534
CantonS	3	3	0	79.32358715	1.139	90.34956576	0	1	D	348.534
CantonS	3	4	0	79.32358715	1.139	90.34956576	0	3	D	348.534
CantonS	3	5	0	79.32358715	1.139	90.34956576	0	7	D	348.534
CantonS	3	6	0	79.32358715	1.139	90.34956576	0	3	D	348.534
CantonS	1	1	1.185	16.81	1.459	24.52579	1.728915	7	E	100.671
CantonS	1	2	1.185	16.81	1.459	24.52579	1.728915	2	E	100.671
CantonS	1	3	1.185	16.81	1.459	24.52579	1.728915	0	E	100.671
CantonS	1	4	1.185	16.81	1.459	24.52579	1.728915	0	E	100.671
CantonS	1	5	1.185	16.81	1.459	24.52579	1.728915	0	E	100.671
CantonS	1	6	1.185	16.81	1.459	24.52579	1.728915	0	E	100.671
CantonS	1	7	1.185	16.81	1.459	24.52579	1.728915	0	E	100.671
CantonS	1	8	1.185	16.81	1.459	24.52579	1.728915	6	E	100.671
CantonS	1	9	1.185	16.81	1.459	24.52579	1.728915	0	E	100.671
CantonS	2	1	1.185	16.81	1.459	24.52579	1.728915	3	E	100.671
CantonS	2	2	1.185	16.81	1.459	24.52579	1.728915	2	E	100.671
CantonS	2	3	1.185	16.81	1.459	24.52579	1.728915	0	E	100.671
CantonS	2	4	1.185	16.81	1.459	24.52579	1.728915	1	E	100.671
CantonS	2	5	1.185	16.81	1.459	24.52579	1.728915	0	E	100.671
CantonS	2	6	1.185	16.81	1.459	24.52579	1.728915	3	E	100.671
CantonS	2	7	1.185	16.81	1.459	24.52579	1.728915	4	E	100.671
CantonS	2	8	1.185	16.81	1.459	24.52579	1.728915	0	E	100.671
CantonS	2	9	1.185	16.81	1.459	24.52579	1.728915	4	E	100.671
CantonS	2	10	1.185	16.81	1.459	24.52579	1.728915	1	E	100.671
CantonS	3	1	1.185	16.81	1.459	24.52579	1.728915	4	E	100.671
CantonS	3	2	1.185	16.81	1.459	24.52579	1.728915	2	E	100.671
CantonS	3	3	1.185	16.81	1.459	24.52579	1.728915	11	E	100.671
CantonS	3	4	1.185	16.81	1.459	24.52579	1.728915	0	E	100.671
CantonS	3	5	1.185	16.81	1.459	24.52579	1.728915	5	E	100.671
CantonS	3	6	1.185	16.81	1.459	24.52579	1.728915	0	E	100.671
CantonS	3	7	1.185	16.81	1.459	24.52579	1.728915	15	E	100.671
CantonS	3	8	1.185	16.81	1.459	24.52579	1.728915	4	E	100.671
CantonS	3	9	1.185	16.81	1.459	24.52579	1.728915	1	E	100.671
CantonS	3	10	1.185	16.81	1.459	24.52579	1.728915	0	E	100.671
CantonS	1	1	10.59	7.4	1.385	10.249	14.66715	3	F	95.565
CantonS	1	2	10.59	7.4	1.385	10.249	14.66715	3	F	95.565
CantonS	1	3	10.59	7.4	1.385	10.249	14.66715	3	F	95.565
CantonS	1	4	10.59	7.4	1.385	10.249	14.66715	6	F	95.565
CantonS	1	5	10.59	7.4	1.385	10.249	14.66715	7	F	95.565
CantonS	1	6	10.59	7.4	1.385	10.249	14.66715	8	F	95.565
CantonS	1	7	10.59	7.4	1.385	10.249	14.66715	12	F	95.565
CantonS	1	8	10.59	7.4	1.385	10.249	14.66715	10	F	95.565
CantonS	1	9	10.59	7.4	1.385	10.249	14.66715	17	F	95.565
CantonS	2	1	10.59	7.4	1.385	10.249	14.66715	8	F	95.565
CantonS	2	2	10.59	7.4	1.385	10.249	14.66715	18	F	95.565
CantonS	2	3	10.59	7.4	1.385	10.249	14.66715	9	F	95.565
CantonS	2	5	10.59	7.4	1.385	10.249	14.66715	40	F	95.565
CantonS	2	6	10.59	7.4	1.385	10.249	14.66715	26	F	95.565
CantonS	2	7	10.59	7.4	1.385	10.249	14.66715	6	F	95.565
CantonS	2	8	10.59	7.4	1.385	10.249	14.66715	10	F	95.565
CantonS	2	9	10.59	7.4	1.385	10.249	14.66715	5	F	95.565
CantonS	2	10	10.59	7.4	1.385	10.249	14.66715	4	F	95.565
CantonS	3	1	10.59	7.4	1.385	10.249	14.66715	13	F	95.565
CantonS	3	2	10.59	7.4	1.385	10.249	14.66715	3	F	95.565
CantonS	3	3	10.59	7.4	1.385	10.249	14.66715	5	F	95.565
CantonS	3	4	10.59	7.4	1.385	10.249	14.66715	6	F	95.565
CantonS	3	5	10.59	7.4	1.385	10.249	14.66715	14	F	95.565
CantonS	3	6	10.59	7.4	1.385	10.249	14.66715	14	F	95.565
CantonS	3	7	10.59	7.4	1.385	10.249	14.66715	19	F	95.565
CantonS	3	8	10.59	7.4	1.385	10.249	14.66715	20	F	95.565
CantonS	3	9	10.59	7.4	1.385	10.249	14.66715	2	F	95.565
CantonS	1	1	105.9	168.1	0.179	30.0899	18.9561	3	G	189.80802
CantonS	1	2	105.9	168.1	0.179	30.0899	18.9561	26	G	189.80802
CantonS	1	3	105.9	168.1	0.179	30.0899	18.9561	1	G	189.80802
CantonS	1	4	105.9	168.1	0.179	30.0899	18.9561	2	G	189.80802
CantonS	1	5	105.9	168.1	0.179	30.0899	18.9561	28	G	189.80802
CantonS	1	6	105.9	168.1	0.179	30.0899	18.9561	38	G	189.80802
CantonS	1	7	105.9	168.1	0.179	30.0899	18.9561	4	G	189.80802
CantonS	1	8	105.9	168.1	0.179	30.0899	18.9561	25	G	189.80802
CantonS	1	9	105.9	168.1	0.179	30.0899	18.9561	6	G	189.80802
CantonS	2	1	105.9	168.1	0.179	30.0899	18.9561	19	G	189.80802
CantonS	2	2	105.9	168.1	0.179	30.0899	18.9561	21	G	189.80802
CantonS	2	3	105.9	168.1	0.179	30.0899	18.9561	59	G	189.80802
CantonS	2	4	105.9	168.1	0.179	30.0899	18.9561	36	G	189.80802
CantonS	2	5	105.9	168.1	0.179	30.0899	18.9561	9	G	189.80802
CantonS	2	6	105.9	168.1	0.179	30.0899	18.9561	13	G	189.80802
CantonS	2	7	105.9	168.1	0.179	30.0899	18.9561	15	G	189.80802
CantonS	2	8	105.9	168.1	0.179	30.0899	18.9561	8	G	189.80802
CantonS	2	9	105.9	168.1	0.179	30.0899	18.9561	54	G	189.80802
CantonS	2	10	105.9	168.1	0.179	30.0899	18.9561	19	G	189.80802
CantonS	3	1	105.9	168.1	0.179	30.0899	18.9561	23	G	189.80802
CantonS	3	2	105.9	168.1	0.179	30.0899	18.9561	67	G	189.80802
CantonS	3	3	105.9	168.1	0.179	30.0899	18.9561	25	G	189.80802
CantonS	3	4	105.9	168.1	0.179	30.0899	18.9561	32	G	189.80802
CantonS	3	5	105.9	168.1	0.179	30.0899	18.9561	40	G	189.80802
CantonS	3	6	105.9	168.1	0.179	30.0899	18.9561	28	G	189.80802
CantonS	3	7	105.9	168.1	0.179	30.0899	18.9561	33	G	189.80802
CantonS	3	8	105.9	168.1	0.179	30.0899	18.9561	59	G	189.80802
CantonS	1	1	105.9	74.1	0.142	10.5222	15.0378	15	H	98.889723
CantonS	1	2	105.9	74.1	0.142	10.5222	15.0378	26	H	98.889723
CantonS	1	3	105.9	74.1	0.142	10.5222	15.0378	62	H	98.889723
CantonS	1	4	105.9	74.1	0.142	10.5222	15.0378	17	H	98.889723
CantonS	1	5	105.9	74.1	0.142	10.5222	15.0378	71	H	98.889723
CantonS	1	6	105.9	74.1	0.142	10.5222	15.0378	23	H	98.889723
CantonS	1	7	105.9	74.1	0.142	10.5222	15.0378	33	H	98.889723
CantonS	1	8	105.9	74.1	0.142	10.5222	15.0378	38	H	98.889723
CantonS	1	10	105.9	74.1	0.142	10.5222	15.0378	49	H	98.889723
CantonS	2	1	105.9	74.1	0.142	10.5222	15.0378	23	H	98.889723
CantonS	2	2	105.9	74.1	0.142	10.5222	15.0378	20	H	98.889723
CantonS	2	3	105.9	74.1	0.142	10.5222	15.0378	15	H	98.889723
CantonS	2	4	105.9	74.1	0.142	10.5222	15.0378	9	H	98.889723
CantonS	2	5	105.9	74.1	0.142	10.5222	15.0378	16	H	98.889723
CantonS	2	6	105.9	74.1	0.142	10.5222	15.0378	46	H	98.889723
CantonS	2	7	105.9	74.1	0.142	10.5222	15.0378	17	H	98.889723
CantonS	2	8	105.9	74.1	0.142	10.5222	15.0378	31	H	98.889723
CantonS	2	9	105.9	74.1	0.142	10.5222	15.0378	15	H	98.889723
CantonS	2	10	105.9	74.1	0.142	10.5222	15.0378	23	H	98.889723
CantonS	2	11	105.9	74.1	0.142	10.5222	15.0378	20	H	98.889723
CantonS	3	1	105.9	74.1	0.142	10.5222	15.0378	18	H	98.889723
CantonS	3	2	105.9	74.1	0.142	10.5222	15.0378	38	H	98.889723
CantonS	3	3	105.9	74.1	0.142	10.5222	15.0378	22	H	98.889723
CantonS	3	4	105.9	74.1	0.142	10.5222	15.0378	63	H	98.889723
CantonS	3	5	105.9	74.1	0.142	10.5222	15.0378	44	H	98.889723
CantonS	3	6	105.9	74.1	0.142	10.5222	15.0378	32	H	98.889723
CantonS	1	2	105.9	74.1	0.142	10.5222	15.0378	85	H	98.889723
CantonS	1	3	105.9	74.1	0.142	10.5222	15.0378	31	H	98.889723
CantonS	1	4	105.9	74.1	0.142	10.5222	15.0378	38	H	98.889723
CantonS	1	5	105.9	74.1	0.142	10.5222	15.0378	52	H	98.889723
CantonS	1	6	105.9	74.1	0.142	10.5222	15.0378	61	H	98.889723
CantonS	1	7	105.9	74.1	0.142	10.5222	15.0378	1	H	98.889723
CantonS	1	1	105.9	74.1	0.142	10.5222	15.0378	20	H	98.889723
CantonS	1	2	105.9	74.1	0.142	10.5222	15.0378	16	H	98.889723
CantonS	1	3	105.9	74.1	0.142	10.5222	15.0378	29	H	98.889723
CantonS	1	4	105.9	74.1	0.142	10.5222	15.0378	17	H	98.889723
CantonS	1	6	105.9	74.1	0.142	10.5222	15.0378	71	H	98.889723
CantonS	2	1	105.9	74.1	0.142	10.5222	15.0378	22	H	98.889723
CantonS	2	2	105.9	74.1	0.142	10.5222	15.0378	47	H	98.889723
CantonS	2	3	105.9	74.1	0.142	10.5222	15.0378	29	H	98.889723
CantonS	2	4	105.9	74.1	0.142	10.5222	15.0378	31	H	98.889723
CantonS	2	5	105.9	74.1	0.142	10.5222	15.0378	75	H	98.889723
CantonS	2	6	105.9	74.1	0.142	10.5222	15.0378	24	H	98.889723
CantonS	2	7	105.9	74.1	0.142	10.5222	15.0378	25	H	98.889723
CantonS	2	8	105.9	74.1	0.142	10.5222	15.0378	51	H	98.889723
CantonS	2	9	105.9	74.1	0.142	10.5222	15.0378	34	H	98.889723
CantonS	2	1	105.9	74.1	0.142	10.5222	15.0378	52	H	98.889723
CantonS	2	2	105.9	74.1	0.142	10.5222	15.0378	49	H	98.889723
CantonS	2	3	105.9	74.1	0.142	10.5222	15.0378	29	H	98.889723
CantonS	2	4	105.9	74.1	0.142	10.5222	15.0378	51	H	98.889723
CantonS	2	5	105.9	74.1	0.142	10.5222	15.0378	48	H	98.889723
CantonS	2	6	105.9	74.1	0.142	10.5222	15.0378	61	H	98.889723
CantonS	2	7	105.9	74.1	0.142	10.5222	15.0378	35	H	98.889723
CantonS	2	8	105.9	74.1	0.142	10.5222	15.0378	27	H	98.889723
CantonS	2	9	105.9	74.1	0.142	10.5222	15.0378	36	H	98.889723
CantonS	3	1	105.9	74.1	0.142	10.5222	15.0378	26	H	98.889723
CantonS	3	2	105.9	74.1	0.142	10.5222	15.0378	26	H	98.889723
CantonS	3	3	105.9	74.1	0.142	10.5222	15.0378	41	H	98.889723
CantonS	3	4	105.9	74.1	0.142	10.5222	15.0378	9	H	98.889723
CantonS	3	5	105.9	74.1	0.142	10.5222	15.0378	51	H	98.889723
CantonS	3	6	105.9	74.1	0.142	10.5222	15.0378	17	H	98.889723
CantonS	3	7	105.9	74.1	0.142	10.5222	15.0378	38	H	98.889723
CantonS	3	8	105.9	74.1	0.142	10.5222	15.0378	35	H	98.889723
CantonS	3	9	105.9	74.1	0.142	10.5222	15.0378	21	H	98.889723
CantonS	3	1	105.9	74.1	0.142	10.5222	15.0378	28	H	98.889723
CantonS	3	3	105.9	74.1	0.142	10.5222	15.0378	16	H	98.889723
CantonS	3	4	105.9	74.1	0.142	10.5222	15.0378	28	H	98.889723
CantonS	3	5	105.9	74.1	0.142	10.5222	15.0378	48	H	98.889723
CantonS	3	7	105.9	74.1	0.142	10.5222	15.0378	35	H	98.889723
CantonS	1	1	11.85	168.1	0.44	73.964	5.214	10	I	306.41886
CantonS	1	2	11.85	168.1	0.44	73.964	5.214	1	I	306.41886
CantonS	1	3	11.85	168.1	0.44	73.964	5.214	11	I	306.41886
CantonS	1	4	11.85	168.1	0.44	73.964	5.214	11	I	306.41886
CantonS	1	5	11.85	168.1	0.44	73.964	5.214	25	I	306.41886
CantonS	1	6	11.85	168.1	0.44	73.964	5.214	6	I	306.41886
CantonS	1	7	11.85	168.1	0.44	73.964	5.214	10	I	306.41886
CantonS	1	8	11.85	168.1	0.44	73.964	5.214	16	I	306.41886
CantonS	1	9	11.85	168.1	0.44	73.964	5.214	2	I	306.41886
CantonS	2	1	11.85	168.1	0.44	73.964	5.214	6	I	306.41886
CantonS	2	2	11.85	168.1	0.44	73.964	5.214	9	I	306.41886
CantonS	2	3	11.85	168.1	0.44	73.964	5.214	9	I	306.41886
CantonS	2	4	11.85	168.1	0.44	73.964	5.214	25	I	306.41886
CantonS	2	5	11.85	168.1	0.44	73.964	5.214	9	I	306.41886
CantonS	2	6	11.85	168.1	0.44	73.964	5.214	10	I	306.41886
CantonS	2	7	11.85	168.1	0.44	73.964	5.214	6	I	306.41886
CantonS	2	8	11.85	168.1	0.44	73.964	5.214	8	I	306.41886
CantonS	2	9	11.85	168.1	0.44	73.964	5.214	9	I	306.41886
CantonS	2	10	11.85	168.1	0.44	73.964	5.214	19	I	306.41886
CantonS	3	1	11.85	168.1	0.44	73.964	5.214	26	I	306.41886
CantonS	3	2	11.85	168.1	0.44	73.964	5.214	35	I	306.41886
CantonS	3	3	11.85	168.1	0.44	73.964	5.214	3	I	306.41886
CantonS	3	4	11.85	168.1	0.44	73.964	5.214	21	I	306.41886
CantonS	3	5	11.85	168.1	0.44	73.964	5.214	11	I	306.41886
CantonS	3	6	11.85	168.1	0.44	73.964	5.214	37	I	306.41886
CantonS	3	7	11.85	168.1	0.44	73.964	5.214	6	I	306.41886
CantonS	3	8	11.85	168.1	0.44	73.964	5.214	31	I	306.41886
CantonS	3	9	11.85	168.1	0.44	73.964	5.214	9	I	306.41886
CantonS	1	1	11.85	168.1	0.44	73.964	5.214	6	I	306.41886
CantonS	1	2	11.85	168.1	0.44	73.964	5.214	2	I	306.41886
CantonS	1	3	11.85	168.1	0.44	73.964	5.214	7	I	306.41886
CantonS	1	4	11.85	168.1	0.44	73.964	5.214	18	I	306.41886
CantonS	1	5	11.85	168.1	0.44	73.964	5.214	3	I	306.41886
CantonS	1	6	11.85	168.1	0.44	73.964	5.214	14	I	306.41886
CantonS	1	7	11.85	168.1	0.44	73.964	5.214	4	I	306.41886
CantonS	1	8	11.85	168.1	0.44	73.964	5.214	10	I	306.41886
CantonS	1	9	11.85	168.1	0.44	73.964	5.214	22	I	306.41886
CantonS	1	1	11.85	168.1	0.44	73.964	5.214	12	I	306.41886
CantonS	1	2	11.85	168.1	0.44	73.964	5.214	0	I	306.41886
CantonS	1	3	11.85	168.1	0.44	73.964	5.214	3	I	306.41886
CantonS	1	4	11.85	168.1	0.44	73.964	5.214	5	I	306.41886
CantonS	1	5	11.85	168.1	0.44	73.964	5.214	4	I	306.41886
CantonS	1	6	11.85	168.1	0.44	73.964	5.214	10	I	306.41886
CantonS	1	7	11.85	168.1	0.44	73.964	5.214	2	I	306.41886
CantonS	1	8	11.85	168.1	0.44	73.964	5.214	0	I	306.41886
CantonS	2	1	11.85	168.1	0.44	73.964	5.214	15	I	306.41886
CantonS	2	2	11.85	168.1	0.44	73.964	5.214	19	I	306.41886
CantonS	2	3	11.85	168.1	0.44	73.964	5.214	16	I	306.41886
CantonS	2	4	11.85	168.1	0.44	73.964	5.214	9	I	306.41886
CantonS	2	5	11.85	168.1	0.44	73.964	5.214	15	I	306.41886
CantonS	2	6	11.85	168.1	0.44	73.964	5.214	14	I	306.41886
CantonS	2	7	11.85	168.1	0.44	73.964	5.214	16	I	306.41886
CantonS	2	1	11.85	168.1	0.44	73.964	5.214	1	I	306.41886
CantonS	2	2	11.85	168.1	0.44	73.964	5.214	13	I	306.41886
CantonS	2	3	11.85	168.1	0.44	73.964	5.214	19	I	306.41886
CantonS	2	4	11.85	168.1	0.44	73.964	5.214	4	I	306.41886
CantonS	2	5	11.85	168.1	0.44	73.964	5.214	26	I	306.41886
CantonS	2	6	11.85	168.1	0.44	73.964	5.214	21	I	306.41886
CantonS	2	7	11.85	168.1	0.44	73.964	5.214	8	I	306.41886
CantonS	3	1	11.85	168.1	0.44	73.964	5.214	8	I	306.41886
CantonS	3	2	11.85	168.1	0.44	73.964	5.214	13	I	306.41886
CantonS	3	3	11.85	168.1	0.44	73.964	5.214	2	I	306.41886
CantonS	3	4	11.85	168.1	0.44	73.964	5.214	9	I	306.41886
CantonS	3	5	11.85	168.1	0.44	73.964	5.214	11	I	306.41886
CantonS	3	6	11.85	168.1	0.44	73.964	5.214	6	I	306.41886
CantonS	3	7	11.85	168.1	0.44	73.964	5.214	14	I	306.41886
CantonS	3	8	11.85	168.1	0.44	73.964	5.214	8	I	306.41886
CantonS	3	9	11.85	168.1	0.44	73.964	5.214	13	I	306.41886
CantonS	3	1	11.85	168.1	0.44	73.964	5.214	15	I	306.41886
CantonS	3	2	11.85	168.1	0.44	73.964	5.214	9	I	306.41886
CantonS	3	3	11.85	168.1	0.44	73.964	5.214	5	I	306.41886
CantonS	3	4	11.85	168.1	0.44	73.964	5.214	3	I	306.41886
CantonS	3	5	11.85	168.1	0.44	73.964	5.214	2	I	306.41886
CantonS	3	6	11.85	168.1	0.44	73.964	5.214	3	I	306.41886
CantonS	3	7	11.85	168.1	0.44	73.964	5.214	20	I	306.41886
CantonS	1	1	161.2033333	112.7966667	0.24	27.0712	38.6888	44	J	254.4912
CantonS	1	2	161.2033333	112.7966667	0.24	27.0712	38.6888	19	J	254.4912
CantonS	1	3	161.2033333	112.7966667	0.24	27.0712	38.6888	16	J	254.4912
CantonS	1	4	161.2033333	112.7966667	0.24	27.0712	38.6888	7	J	254.4912
CantonS	1	5	161.2033333	112.7966667	0.24	27.0712	38.6888	41	J	254.4912
CantonS	1	6	161.2033333	112.7966667	0.24	27.0712	38.6888	52	J	254.4912
CantonS	1	7	161.2033333	112.7966667	0.24	27.0712	38.6888	40	J	254.4912
CantonS	1	8	161.2033333	112.7966667	0.24	27.0712	38.6888	19	J	254.4912
CantonS	1	9	161.2033333	112.7966667	0.24	27.0712	38.6888	6	J	254.4912
CantonS	2	1	161.2033333	112.7966667	0.24	27.0712	38.6888	15	J	254.4912
CantonS	2	2	161.2033333	112.7966667	0.24	27.0712	38.6888	33	J	254.4912
CantonS	2	3	161.2033333	112.7966667	0.24	27.0712	38.6888	10	J	254.4912
CantonS	2	4	161.2033333	112.7966667	0.24	27.0712	38.6888	11	J	254.4912
CantonS	2	5	161.2033333	112.7966667	0.24	27.0712	38.6888	19	J	254.4912
CantonS	2	6	161.2033333	112.7966667	0.24	27.0712	38.6888	21	J	254.4912
CantonS	2	7	161.2033333	112.7966667	0.24	27.0712	38.6888	10	J	254.4912
CantonS	2	8	161.2033333	112.7966667	0.24	27.0712	38.6888	27	J	254.4912
CantonS	2	9	161.2033333	112.7966667	0.24	27.0712	38.6888	24	J	254.4912
CantonS	2	10	161.2033333	112.7966667	0.24	27.0712	38.6888	12	J	254.4912
CantonS	2	11	161.2033333	112.7966667	0.24	27.0712	38.6888	19	J	254.4912
CantonS	3	1	161.2033333	112.7966667	0.24	27.0712	38.6888	11	J	254.4912
CantonS	3	2	161.2033333	112.7966667	0.24	27.0712	38.6888	57	J	254.4912
CantonS	3	3	161.2033333	112.7966667	0.24	27.0712	38.6888	26	J	254.4912
CantonS	3	4	161.2033333	112.7966667	0.24	27.0712	38.6888	77	J	254.4912
CantonS	3	5	161.2033333	112.7966667	0.24	27.0712	38.6888	53	J	254.4912
CantonS	3	6	161.2033333	112.7966667	0.24	27.0712	38.6888	25	J	254.4912
CantonS	3	7	161.2033333	112.7966667	0.24	27.0712	38.6888	45	J	254.4912
CantonS	3	8	161.2033333	112.7966667	0.24	27.0712	38.6888	17	J	254.4912
CantonS	3	9	161.2033333	112.7966667	0.24	27.0712	38.6888	15	J	254.4912
CantonS	3	10	161.2033333	112.7966667	0.24	27.0712	38.6888	4	J	254.4912
CantonS	3	11	161.2033333	112.7966667	0.24	27.0712	38.6888	20	J	254.4912
CantonS	1	1	17.99833333	0	1.154	0	20.77007667	37	K	79.626
CantonS	1	2	17.99833333	0	1.154	0	20.77007667	17	K	79.626
CantonS	1	3	17.99833333	0	1.154	0	20.77007667	23	K	79.626
CantonS	1	4	17.99833333	0	1.154	0	20.77007667	30	K	79.626
CantonS	1	5	17.99833333	0	1.154	0	20.77007667	41	K	79.626
CantonS	1	6	17.99833333	0	1.154	0	20.77007667	27	K	79.626
CantonS	1	7	17.99833333	0	1.154	0	20.77007667	68	K	79.626
CantonS	1	8	17.99833333	0	1.154	0	20.77007667	12	K	79.626
CantonS	1	9	17.99833333	0	1.154	0	20.77007667	10	K	79.626
CantonS	2	1	17.99833333	0	1.154	0	20.77007667	11	K	79.626
CantonS	2	2	17.99833333	0	1.154	0	20.77007667	10	K	79.626
CantonS	2	3	17.99833333	0	1.154	0	20.77007667	13	K	79.626
CantonS	2	4	17.99833333	0	1.154	0	20.77007667	20	K	79.626
CantonS	2	5	17.99833333	0	1.154	0	20.77007667	15	K	79.626
CantonS	2	6	17.99833333	0	1.154	0	20.77007667	11	K	79.626
CantonS	2	7	17.99833333	0	1.154	0	20.77007667	31	K	79.626
CantonS	3	1	17.99833333	0	1.154	0	20.77007667	13	K	79.626
CantonS	3	2	17.99833333	0	1.154	0	20.77007667	16	K	79.626
CantonS	3	3	17.99833333	0	1.154	0	20.77007667	39	K	79.626
CantonS	3	4	17.99833333	0	1.154	0	20.77007667	9	K	79.626
CantonS	3	5	17.99833333	0	1.154	0	20.77007667	25	K	79.626
CantonS	3	6	17.99833333	0	1.154	0	20.77007667	46	K	79.626
CantonS	3	7	17.99833333	0	1.154	0	20.77007667	27	K	79.626
CantonS	3	8	17.99833333	0	1.154	0	20.77007667	26	K	79.626
CantonS	1	1	179.9833333	0	0.201	0	36.17665	18	L	139.9777065
CantonS	1	2	179.9833333	0	0.201	0	36.17665	32	L	139.9777065
CantonS	1	3	179.9833333	0	0.201	0	36.17665	18	L	139.9777065
CantonS	1	4	179.9833333	0	0.201	0	36.17665	15	L	139.9777065
CantonS	1	5	179.9833333	0	0.201	0	36.17665	17	L	139.9777065
CantonS	1	6	179.9833333	0	0.201	0	36.17665	38	L	139.9777065
CantonS	1	7	179.9833333	0	0.201	0	36.17665	27	L	139.9777065
CantonS	1	8	179.9833333	0	0.201	0	36.17665	8	L	139.9777065
CantonS	2	1	179.9833333	0	0.201	0	36.17665	71	L	139.9777065
CantonS	2	2	179.9833333	0	0.201	0	36.17665	77	L	139.9777065
CantonS	2	3	179.9833333	0	0.201	0	36.17665	6	L	139.9777065
CantonS	2	4	179.9833333	0	0.201	0	36.17665	25	L	139.9777065
CantonS	2	6	179.9833333	0	0.201	0	36.17665	21	L	139.9777065
CantonS	2	7	179.9833333	0	0.201	0	36.17665	2	L	139.9777065
CantonS	2	8	179.9833333	0	0.201	0	36.17665	1	L	139.9777065
CantonS	2	9	179.9833333	0	0.201	0	36.17665	31	L	139.9777065
CantonS	3	1	179.9833333	0	0.201	0	36.17665	21	L	139.9777065
CantonS	3	2	179.9833333	0	0.201	0	36.17665	4	L	139.9777065
CantonS	3	3	179.9833333	0	0.201	0	36.17665	47	L	139.9777065
CantonS	3	4	179.9833333	0	0.201	0	36.17665	6	L	139.9777065
CantonS	3	5	179.9833333	0	0.201	0	36.17665	15	L	139.9777065
CantonS	3	6	179.9833333	0	0.201	0	36.17665	31	L	139.9777065
CantonS	3	7	179.9833333	0	0.201	0	36.17665	20	L	139.9777065
CantonS	3	8	179.9833333	0	0.201	0	36.17665	0	L	139.9777065
CantonS	1	1	18.04334537	255.9566546	0.24	61.42959711	4.33040289	43	M	254.4912
CantonS	1	2	18.04334537	255.9566546	0.24	61.42959711	4.33040289	17	M	254.4912
CantonS	1	3	18.04334537	255.9566546	0.24	61.42959711	4.33040289	20	M	254.4912
CantonS	1	4	18.04334537	255.9566546	0.24	61.42959711	4.33040289	10	M	254.4912
CantonS	1	5	18.04334537	255.9566546	0.24	61.42959711	4.33040289	28	M	254.4912
CantonS	1	6	18.04334537	255.9566546	0.24	61.42959711	4.33040289	18	M	254.4912
CantonS	1	7	18.04334537	255.9566546	0.24	61.42959711	4.33040289	12	M	254.4912
CantonS	1	8	18.04334537	255.9566546	0.24	61.42959711	4.33040289	5	M	254.4912
CantonS	1	9	18.04334537	255.9566546	0.24	61.42959711	4.33040289	46	M	254.4912
CantonS	1	10	18.04334537	255.9566546	0.24	61.42959711	4.33040289	6	M	254.4912
CantonS	2	1	18.04334537	255.9566546	0.24	61.42959711	4.33040289	19	M	254.4912
CantonS	2	2	18.04334537	255.9566546	0.24	61.42959711	4.33040289	3	M	254.4912
CantonS	2	3	18.04334537	255.9566546	0.24	61.42959711	4.33040289	5	M	254.4912
CantonS	2	4	18.04334537	255.9566546	0.24	61.42959711	4.33040289	37	M	254.4912
CantonS	2	5	18.04334537	255.9566546	0.24	61.42959711	4.33040289	9	M	254.4912
CantonS	2	6	18.04334537	255.9566546	0.24	61.42959711	4.33040289	1	M	254.4912
CantonS	2	7	18.04334537	255.9566546	0.24	61.42959711	4.33040289	44	M	254.4912
CantonS	2	8	18.04334537	255.9566546	0.24	61.42959711	4.33040289	11	M	254.4912
CantonS	2	9	18.04334537	255.9566546	0.24	61.42959711	4.33040289	31	M	254.4912
CantonS	2	10	18.04334537	255.9566546	0.24	61.42959711	4.33040289	5	M	254.4912
CantonS	3	1	18.04334537	255.9566546	0.24	61.42959711	4.33040289	14	M	254.4912
CantonS	3	2	18.04334537	255.9566546	0.24	61.42959711	4.33040289	14	M	254.4912
CantonS	3	3	18.04334537	255.9566546	0.24	61.42959711	4.33040289	25	M	254.4912
CantonS	3	4	18.04334537	255.9566546	0.24	61.42959711	4.33040289	15	M	254.4912
CantonS	3	5	18.04334537	255.9566546	0.24	61.42959711	4.33040289	6	M	254.4912
CantonS	3	6	18.04334537	255.9566546	0.24	61.42959711	4.33040289	15	M	254.4912
CantonS	3	7	18.04334537	255.9566546	0.24	61.42959711	4.33040289	22	M	254.4912
CantonS	1	1	274	0	0.172	0	47.128	11	N	182.38536
CantonS	1	2	274	0	0.172	0	47.128	14	N	182.38536
CantonS	1	3	274	0	0.172	0	47.128	15	N	182.38536
CantonS	1	4	274	0	0.172	0	47.128	14	N	182.38536
CantonS	1	5	274	0	0.172	0	47.128	27	N	182.38536
CantonS	1	6	274	0	0.172	0	47.128	10	N	182.38536
CantonS	1	7	274	0	0.172	0	47.128	13	N	182.38536
CantonS	1	8	274	0	0.172	0	47.128	2	N	182.38536
CantonS	2	1	274	0	0.172	0	47.128	0	N	182.38536
CantonS	2	2	274	0	0.172	0	47.128	2	N	182.38536
CantonS	2	3	274	0	0.172	0	47.128	20	N	182.38536
CantonS	2	4	274	0	0.172	0	47.128	4	N	182.38536
CantonS	2	5	274	0	0.172	0	47.128	17	N	182.38536
CantonS	2	6	274	0	0.172	0	47.128	6	N	182.38536
CantonS	2	7	274	0	0.172	0	47.128	11	N	182.38536
CantonS	2	8	274	0	0.172	0	47.128	2	N	182.38536
CantonS	2	9	274	0	0.172	0	47.128	1	N	182.38536
CantonS	3	1	274	0	0.172	0	47.128	8	N	182.38536
CantonS	3	2	274	0	0.172	0	47.128	5	N	182.38536
CantonS	3	3	274	0	0.172	0	47.128	14	N	182.38536
CantonS	3	5	274	0	0.172	0	47.128	7	N	182.38536
CantonS	3	6	274	0	0.172	0	47.128	2	N	182.38536
CantonS	3	7	274	0	0.172	0	47.128	1	N	182.38536
CantonS	3	8	274	0	0.172	0	47.128	5	N	182.38536
CantonS	2	1	30.65827693	48.66531022	0.365	17.76283823	11.19027108	7	O	111.69
CantonS	2	2	30.65827693	48.66531022	0.365	17.76283823	11.19027108	13	O	111.69
CantonS	2	3	30.65827693	48.66531022	0.365	17.76283823	11.19027108	22	O	111.69
CantonS	2	4	30.65827693	48.66531022	0.365	17.76283823	11.19027108	22	O	111.69
CantonS	2	5	30.65827693	48.66531022	0.365	17.76283823	11.19027108	9	O	111.69
CantonS	2	6	30.65827693	48.66531022	0.365	17.76283823	11.19027108	14	O	111.69
CantonS	2	7	30.65827693	48.66531022	0.365	17.76283823	11.19027108	21	O	111.69
CantonS	2	8	30.65827693	48.66531022	0.365	17.76283823	11.19027108	6	O	111.69
CantonS	2	9	30.65827693	48.66531022	0.365	17.76283823	11.19027108	15	O	111.69
CantonS	2	10	30.65827693	48.66531022	0.365	17.76283823	11.19027108	11	O	111.69
CantonS	3	1	30.65827693	48.66531022	0.365	17.76283823	11.19027108	15	O	111.69
CantonS	3	2	30.65827693	48.66531022	0.365	17.76283823	11.19027108	36	O	111.69
CantonS	3	3	30.65827693	48.66531022	0.365	17.76283823	11.19027108	32	O	111.69
CantonS	3	4	30.65827693	48.66531022	0.365	17.76283823	11.19027108	35	O	111.69
CantonS	3	5	30.65827693	48.66531022	0.365	17.76283823	11.19027108	11	O	111.69
CantonS	3	6	30.65827693	48.66531022	0.365	17.76283823	11.19027108	17	O	111.69
CantonS	3	7	30.65827693	48.66531022	0.365	17.76283823	11.19027108	20	O	111.69
CantonS	3	8	30.65827693	48.66531022	0.365	17.76283823	11.19027108	12	O	111.69
CantonS	3	9	30.65827693	48.66531022	0.365	17.76283823	11.19027108	26	O	111.69
CantonS	3	10	30.65827693	48.66531022	0.365	17.76283823	11.19027108	22	O	111.69
CantonS	3	11	30.65827693	48.66531022	0.365	17.76283823	11.19027108	18	O	111.69
CantonS	2	1	46.66871044	32.65487671	0.233	7.608586273	10.87380953	29	P	71.298
CantonS	2	2	46.66871044	32.65487671	0.233	7.608586273	10.87380953	10	P	71.298
CantonS	2	3	46.66871044	32.65487671	0.233	7.608586273	10.87380953	25	P	71.298
CantonS	2	4	46.66871044	32.65487671	0.233	7.608586273	10.87380953	8	P	71.298
CantonS	2	5	46.66871044	32.65487671	0.233	7.608586273	10.87380953	51	P	71.298
CantonS	2	6	46.66871044	32.65487671	0.233	7.608586273	10.87380953	23	P	71.298
CantonS	2	7	46.66871044	32.65487671	0.233	7.608586273	10.87380953	17	P	71.298
CantonS	2	8	46.66871044	32.65487671	0.233	7.608586273	10.87380953	11	P	71.298
CantonS	2	9	46.66871044	32.65487671	0.233	7.608586273	10.87380953	11	P	71.298
CantonS	2	10	46.66871044	32.65487671	0.233	7.608586273	10.87380953	11	P	71.298
CantonS	2	11	46.66871044	32.65487671	0.233	7.608586273	10.87380953	14	P	71.298
CantonS	2	12	46.66871044	32.65487671	0.233	7.608586273	10.87380953	28	P	71.298
CantonS	3	1	46.66871044	32.65487671	0.233	7.608586273	10.87380953	55	P	71.298
CantonS	3	2	46.66871044	32.65487671	0.233	7.608586273	10.87380953	53	P	71.298
CantonS	3	3	46.66871044	32.65487671	0.233	7.608586273	10.87380953	21	P	71.298
CantonS	3	4	46.66871044	32.65487671	0.233	7.608586273	10.87380953	44	P	71.298
CantonS	3	5	46.66871044	32.65487671	0.233	7.608586273	10.87380953	43	P	71.298
CantonS	3	6	46.66871044	32.65487671	0.233	7.608586273	10.87380953	29	P	71.298
CantonS	3	7	46.66871044	32.65487671	0.233	7.608586273	10.87380953	23	P	71.298
CantonS	3	8	46.66871044	32.65487671	0.233	7.608586273	10.87380953	22	P	71.298
CantonS	3	9	46.66871044	32.65487671	0.233	7.608586273	10.87380953	38	P	71.298
CantonS	3	10	46.66871044	32.65487671	0.233	7.608586273	10.87380953	58	P	71.298
CantonS	3	11	46.66871044	32.65487671	0.233	7.608586273	10.87380953	21	P	71.298
CantonS	1	1	46.66871044	74.1	0.123	9.1143	5.740251384	34	Q	57.441
CantonS	1	2	46.66871044	74.1	0.123	9.1143	5.740251384	39	Q	57.441
CantonS	1	3	46.66871044	74.1	0.123	9.1143	5.740251384	15	Q	57.441
CantonS	1	4	46.66871044	74.1	0.123	9.1143	5.740251384	23	Q	57.441
CantonS	1	5	46.66871044	74.1	0.123	9.1143	5.740251384	20	Q	57.441
CantonS	1	6	46.66871044	74.1	0.123	9.1143	5.740251384	31	Q	57.441
CantonS	1	7	46.66871044	74.1	0.123	9.1143	5.740251384	6	Q	57.441
CantonS	1	8	46.66871044	74.1	0.123	9.1143	5.740251384	42	Q	57.441
CantonS	2	1	46.66871044	74.1	0.123	9.1143	5.740251384	28	Q	57.441
CantonS	2	2	46.66871044	74.1	0.123	9.1143	5.740251384	31	Q	57.441
CantonS	2	3	46.66871044	74.1	0.123	9.1143	5.740251384	24	Q	57.441
CantonS	2	4	46.66871044	74.1	0.123	9.1143	5.740251384	4	Q	57.441
CantonS	2	5	46.66871044	74.1	0.123	9.1143	5.740251384	25	Q	57.441
CantonS	2	6	46.66871044	74.1	0.123	9.1143	5.740251384	23	Q	57.441
CantonS	2	7	46.66871044	74.1	0.123	9.1143	5.740251384	14	Q	57.441
CantonS	2	8	46.66871044	74.1	0.123	9.1143	5.740251384	69	Q	57.441
CantonS	2	9	46.66871044	74.1	0.123	9.1143	5.740251384	10	Q	57.441
CantonS	2	10	46.66871044	74.1	0.123	9.1143	5.740251384	10	Q	57.441
CantonS	3	1	46.66871044	74.1	0.123	9.1143	5.740251384	2	Q	57.441
CantonS	3	2	46.66871044	74.1	0.123	9.1143	5.740251384	28	Q	57.441
CantonS	3	3	46.66871044	74.1	0.123	9.1143	5.740251384	31	Q	57.441
CantonS	3	4	46.66871044	74.1	0.123	9.1143	5.740251384	22	Q	57.441
CantonS	1	1	5.223587151	74.1	1.01	74.841	5.275823022	3	R	309.06
CantonS	1	2	5.223587151	74.1	1.01	74.841	5.275823022	8	R	309.06
CantonS	1	3	5.223587151	74.1	1.01	74.841	5.275823022	1	R	309.06
CantonS	1	4	5.223587151	74.1	1.01	74.841	5.275823022	3	R	309.06
CantonS	1	5	5.223587151	74.1	1.01	74.841	5.275823022	1	R	309.06
CantonS	1	6	5.223587151	74.1	1.01	74.841	5.275823022	5	R	309.06
CantonS	1	7	5.223587151	74.1	1.01	74.841	5.275823022	7	R	309.06
CantonS	1	8	5.223587151	74.1	1.01	74.841	5.275823022	18	R	309.06
CantonS	1	9	5.223587151	74.1	1.01	74.841	5.275823022	6	R	309.06
CantonS	2	1	5.223587151	74.1	1.01	74.841	5.275823022	1	R	309.06
CantonS	2	2	5.223587151	74.1	1.01	74.841	5.275823022	10	R	309.06
CantonS	2	3	5.223587151	74.1	1.01	74.841	5.275823022	9	R	309.06
CantonS	2	4	5.223587151	74.1	1.01	74.841	5.275823022	23	R	309.06
CantonS	2	5	5.223587151	74.1	1.01	74.841	5.275823022	19	R	309.06
CantonS	2	6	5.223587151	74.1	1.01	74.841	5.275823022	2	R	309.06
CantonS	2	7	5.223587151	74.1	1.01	74.841	5.275823022	2	R	309.06
CantonS	2	8	5.223587151	74.1	1.01	74.841	5.275823022	16	R	309.06
CantonS	2	9	5.223587151	74.1	1.01	74.841	5.275823022	1	R	309.06
CantonS	3	1	5.223587151	74.1	1.01	74.841	5.275823022	9	R	309.06
CantonS	3	2	5.223587151	74.1	1.01	74.841	5.275823022	26	R	309.06
CantonS	3	3	5.223587151	74.1	1.01	74.841	5.275823022	10	R	309.06
CantonS	3	4	5.223587151	74.1	1.01	74.841	5.275823022	0	R	309.06
CantonS	3	5	5.223587151	74.1	1.01	74.841	5.275823022	7	R	309.06
CantonS	3	6	5.223587151	74.1	1.01	74.841	5.275823022	17	R	309.06
CantonS	3	7	5.223587151	74.1	1.01	74.841	5.275823022	2	R	309.06
CantonS	2	1	5.223587151	74.1	1.01	74.841	5.275823022	10	R	309.06
CantonS	2	2	5.223587151	74.1	1.01	74.841	5.275823022	18	R	309.06
CantonS	2	3	5.223587151	74.1	1.01	74.841	5.275823022	6	R	309.06
CantonS	2	4	5.223587151	74.1	1.01	74.841	5.275823022	2	R	309.06
CantonS	2	5	5.223587151	74.1	1.01	74.841	5.275823022	3	R	309.06
CantonS	2	7	5.223587151	74.1	1.01	74.841	5.275823022	8	R	309.06
CantonS	2	8	5.223587151	74.1	1.01	74.841	5.275823022	22	R	309.06
CantonS	3	1	5.223587151	74.1	1.01	74.841	5.275823022	3	R	309.06
CantonS	3	2	5.223587151	74.1	1.01	74.841	5.275823022	11	R	309.06
CantonS	3	3	5.223587151	74.1	1.01	74.841	5.275823022	0	R	309.06
CantonS	3	4	5.223587151	74.1	1.01	74.841	5.275823022	8	R	309.06
CantonS	3	5	5.223587151	74.1	1.01	74.841	5.275823022	7	R	309.06
CantonS	3	6	5.223587151	74.1	1.01	74.841	5.275823022	12	R	309.06
CantonS	3	7	5.223587151	74.1	1.01	74.841	5.275823022	16	R	309.06
CantonS	3	8	5.223587151	74.1	1.01	74.841	5.275823022	6	R	309.06
CantonS	3	9	5.223587151	74.1	1.01	74.841	5.275823022	15	R	309.06
CantonS	3	10	5.223587151	74.1	1.01	74.841	5.275823022	23	R	309.06
CantonS	3	11	5.223587151	74.1	1.01	74.841	5.275823022	9	R	309.06
CantonS	1	1	6.956934307	11.04306569	1.443	15.9351438	10.0388562	5	S	99.567
CantonS	1	2	6.956934307	11.04306569	1.443	15.9351438	10.0388562	2	S	99.567
CantonS	1	3	6.956934307	11.04306569	1.443	15.9351438	10.0388562	8	S	99.567
CantonS	1	4	6.956934307	11.04306569	1.443	15.9351438	10.0388562	1	S	99.567
CantonS	1	5	6.956934307	11.04306569	1.443	15.9351438	10.0388562	9	S	99.567
CantonS	1	6	6.956934307	11.04306569	1.443	15.9351438	10.0388562	12	S	99.567
CantonS	1	7	6.956934307	11.04306569	1.443	15.9351438	10.0388562	0	S	99.567
CantonS	1	8	6.956934307	11.04306569	1.443	15.9351438	10.0388562	4	S	99.567
CantonS	1	9	6.956934307	11.04306569	1.443	15.9351438	10.0388562	4	S	99.567
CantonS	1	10	6.956934307	11.04306569	1.443	15.9351438	10.0388562	4	S	99.567
CantonS	1	11	6.956934307	11.04306569	1.443	15.9351438	10.0388562	0	S	99.567
CantonS	2	1	6.956934307	11.04306569	1.443	15.9351438	10.0388562	1	S	99.567
CantonS	2	2	6.956934307	11.04306569	1.443	15.9351438	10.0388562	35	S	99.567
CantonS	2	3	6.956934307	11.04306569	1.443	15.9351438	10.0388562	0	S	99.567
CantonS	2	4	6.956934307	11.04306569	1.443	15.9351438	10.0388562	1	S	99.567
CantonS	2	5	6.956934307	11.04306569	1.443	15.9351438	10.0388562	0	S	99.567
CantonS	2	6	6.956934307	11.04306569	1.443	15.9351438	10.0388562	0	S	99.567
CantonS	2	7	6.956934307	11.04306569	1.443	15.9351438	10.0388562	2	S	99.567
CantonS	2	8	6.956934307	11.04306569	1.443	15.9351438	10.0388562	3	S	99.567
CantonS	2	9	6.956934307	11.04306569	1.443	15.9351438	10.0388562	9	S	99.567
CantonS	3	1	6.956934307	11.04306569	1.443	15.9351438	10.0388562	6	S	99.567
CantonS	3	2	6.956934307	11.04306569	1.443	15.9351438	10.0388562	5	S	99.567
CantonS	3	3	6.956934307	11.04306569	1.443	15.9351438	10.0388562	6	S	99.567
CantonS	3	4	6.956934307	11.04306569	1.443	15.9351438	10.0388562	14	S	99.567
CantonS	3	5	6.956934307	11.04306569	1.443	15.9351438	10.0388562	1	S	99.567
CantonS	3	6	6.956934307	11.04306569	1.443	15.9351438	10.0388562	16	S	99.567
CantonS	3	7	6.956934307	11.04306569	1.443	15.9351438	10.0388562	2	S	99.567
CantonS	3	8	6.956934307	11.04306569	1.443	15.9351438	10.0388562	5	S	99.567
CantonS	1	1	69.56934307	110.4306569	0.114	12.58909489	7.930905109	7	T	79.390341
CantonS	1	2	69.56934307	110.4306569	0.114	12.58909489	7.930905109	11	T	79.390341
CantonS	1	3	69.56934307	110.4306569	0.114	12.58909489	7.930905109	14	T	79.390341
CantonS	1	4	69.56934307	110.4306569	0.114	12.58909489	7.930905109	49	T	79.390341
CantonS	1	5	69.56934307	110.4306569	0.114	12.58909489	7.930905109	30	T	79.390341
CantonS	1	6	69.56934307	110.4306569	0.114	12.58909489	7.930905109	38	T	79.390341
CantonS	1	7	69.56934307	110.4306569	0.114	12.58909489	7.930905109	45	T	79.390341
CantonS	1	8	69.56934307	110.4306569	0.114	12.58909489	7.930905109	33	T	79.390341
CantonS	1	9	69.56934307	110.4306569	0.114	12.58909489	7.930905109	22	T	79.390341
CantonS	2	1	69.56934307	110.4306569	0.114	12.58909489	7.930905109	50	T	79.390341
CantonS	2	2	69.56934307	110.4306569	0.114	12.58909489	7.930905109	43	T	79.390341
CantonS	2	3	69.56934307	110.4306569	0.114	12.58909489	7.930905109	51	T	79.390341
CantonS	2	4	69.56934307	110.4306569	0.114	12.58909489	7.930905109	45	T	79.390341
CantonS	2	5	69.56934307	110.4306569	0.114	12.58909489	7.930905109	52	T	79.390341
CantonS	2	6	69.56934307	110.4306569	0.114	12.58909489	7.930905109	16	T	79.390341
CantonS	2	7	69.56934307	110.4306569	0.114	12.58909489	7.930905109	44	T	79.390341
CantonS	2	8	69.56934307	110.4306569	0.114	12.58909489	7.930905109	37	T	79.390341
CantonS	2	9	69.56934307	110.4306569	0.114	12.58909489	7.930905109	27	T	79.390341
CantonS	3	1	69.56934307	110.4306569	0.114	12.58909489	7.930905109	32	T	79.390341
CantonS	3	2	69.56934307	110.4306569	0.114	12.58909489	7.930905109	13	T	79.390341
CantonS	3	3	69.56934307	110.4306569	0.114	12.58909489	7.930905109	29	T	79.390341
CantonS	3	4	69.56934307	110.4306569	0.114	12.58909489	7.930905109	30	T	79.390341
CantonS	3	5	69.56934307	110.4306569	0.114	12.58909489	7.930905109	36	T	79.390341
CantonS	3	7	69.56934307	110.4306569	0.114	12.58909489	7.930905109	27	T	79.390341
CantonS	3	8	69.56934307	110.4306569	0.114	12.58909489	7.930905109	40	T	79.390341
CantonS	3	9	69.56934307	110.4306569	0.114	12.58909489	7.930905109	39	T	79.390341
