# Supplementary material for: Multiscale analysis reveals that diet-dependent midgut plasticity emerges from alterations in both stem cell niche coupling and enterocyte size
Source: eLife. 2021 Sep 23;10:e64125. doi: 10.7554/eLife.64125 (PMC8528489; doi:10.7554/eLife.64125)
Supplement: Figure 4—figure supplement 2—source data 2. [file elife-64125-fig4-figsupp2-data2.csv]

Day	Experiment	Repeat	CG	Diet	Post.Real.A	Post.RFP	Post.Dapi	Post.Area	Post.RFP.Density	Post.RFP.Number	Post.Dapi.Density	Post.Dapi.Number
0	G	1	HS	HS	123428.894	354	377	53846.3984	0.006574256	811.4531292	0.007001397	864.1746602
0	G	1	HS	HS	126148.5	489	542	51051.5117	0.009578561	1208.321055	0.010616728	1339.284278
0	G	1	HS	HS	101189.304	409	419	36861.332	0.011095638	1122.759897	0.011366925	1150.21124
0	G	1	HS	HS	114257.768	332	343	21020.8594	0.015793836	1804.568417	0.016317125	1864.358335
0	G	1	HS	HS	108149.58	403	413	34461.0703	0.011694355	1264.739614	0.011984538	1296.122731
0	G	1	HS	HS	153438.192	210	214	23448.4375	0.008955821	1374.164923	0.009126408	1400.339493
0	G	1	HS	HS	146768.188	290	298	25656.8652	0.011303018	1658.923418	0.011614825	1704.686823
0	G	1	HS	HS	88378.859	254	261	19206.457	0.013224719	1168.78559	0.01358918	1200.996217
0	G	1	HS	HS	121902.628	150	190	19962.209	0.007514198	916.0005388	0.009517985	1160.267349
0	G	1	HS	HS	247333.252	545	616	88396.8047	0.006165381	1524.903788	0.006968578	1723.560979
0	G	1	HY	HY	565921.418	492	516	111199.562	0.004424478	2503.906784	0.004640306	2626.048578
0	G	1	HY	HY	546249.535	666	726	125462.727	0.005308349	2899.683428	0.005786579	3160.916169
0	G	1	HY	HY	368773.942	525	542	89408.5929	0.005871919	2165.410653	0.006062057	2235.528712
0	G	1	HY	HY	582682.262	410	436	103649.625	0.003955634	2304.877875	0.004206479	2451.040862
0	G	1	HY	HY	350926.92	189	219	43489.0117	0.004345925	1525.102211	0.005035755	1767.181927
0	G	1	HY	HY	556009.528	393	400	75702.1719	0.005191397	2886.465989	0.005283864	2937.878869
0	G	1	HY	HY	437530.856	409	412	87801.1719	0.004658252	2038.129062	0.00469242	2053.078664
0	G	1	HY	HY	489358.382	176	217	35588.3164	0.004945443	2420.094119	0.006097507	2983.866045
0	G	2	HY	HY	438547.327	419	452	109341.688	0.003832024	1680.523992	0.00413383	1812.880297
0	G	2	HY	HY	453803.753	599	627	119796.383	0.005000151	2269.087273	0.005233881	2375.154792
0	G	2	HY	HY	376670.578	734	738	125756.453	0.005836679	2198.505108	0.005868486	2210.486062
0	G	2	HY	HY	548203.406	511	527	106992.68	0.004776028	2618.234635	0.004925571	2700.214584
0	G	2	HY	HY	554500.948	471	583	119930.188	0.003927285	2177.683124	0.004861161	2695.518602
0	G	2	HY	HY	277497.569	703	705	92564.2031	0.007594729	2107.518722	0.007616335	2113.514508
0	G	2	HY	HY	320308.988	451	503	96193.6094	0.004688461	1501.756244	0.005229038	1674.90774
0	G	2	HY	HY	464311.793	446	449	116765.203	0.003819631	1773.499762	0.003845324	1785.429132
0	G	2	HY	HY	293948.374	500	531	98512.5078	0.005075498	1491.934276	0.005390178	1584.434201
0	G	2	HY	HY	280915.283	714	751	98914.9098	0.007218325	2027.737906	0.007592384	2132.816761
0	G	2	HS	HS	239990.108	159	218	39472.9609	0.004028074	966.6978687	0.005522768	1325.409656
0	G	2	HS	HS	255626.28	62	77	22336.3457	0.002775745	709.5533698	0.003447296	881.2195076
0	G	2	HS	HS	234183.636	317	328	31299.2793	0.010128029	2371.818594	0.010479475	2454.121447
0	G	2	HS	HS	142124.882	344	365	28380.1641	0.012121142	1722.715881	0.012861095	1827.881676
0	G	2	HS	HS	223130.426	747	816	97504.3066	0.0076612	1709.446834	0.008368861	1867.347546
0	G	2	HS	HS	213401.646	286	310	39457.207	0.007248359	1546.811733	0.007856613	1676.614117
0	G	3	HY	HY	509030.266	424	468	108634.391	0.003903	1986.744997	0.004308028	2192.916647
0	G	3	HY	HY	461344.572	101	122	35121.1094	0.002875763	1326.717822	0.003473694	1602.570043
0	G	3	HY	HY	551474.424	403	415	104174.859	0.003868496	2133.376469	0.003983687	2196.901327
0	G	3	HY	HY	365543.5	622	624	117826.242	0.00527896	1929.689457	0.005295934	1935.894247
0	G	3	HY	HY	515433.928	559	566	114345.797	0.00488868	2519.791486	0.004949898	2551.345226
0	G	3	HY	HY	456919.751	660	664	110561.656	0.00596952	2727.591523	0.006005699	2744.122381
0	G	3	HS	HS	182046.071	678	688	58492.3744	0.011591255	2110.142346	0.011762217	2141.265389
0	G	3	HS	HS	271612.026	199	204	24263.6113	0.008201582	2227.648329	0.008407652	2283.619393
0	G	3	HS	HS	197030.952	706	740	90720.2891	0.007782162	1533.326817	0.00815694	1607.169751
0	G	3	HS	HS	262997.514	403	442	92655.3359	0.004349453	1143.895245	0.004770367	1254.594785
0	G	3	HS	HS	210966.07	139	156	26381.1113	0.005268921	1111.563626	0.005913322	1247.510256
0	G	3	HS	HS	202406.699	591	607	80248.6484	0.00736461	1490.646403	0.00756399	1531.002313
5	G	1	HY	HYtoHY	507610.12	443	448	101131.914	0.004380417	2223.544223	0.004429858	2248.640659
5	G	1	HY	HYtoHY	557500.421	82	86	19634.3848	0.004176347	2328.315096	0.004380071	2441.891442
5	G	1	HY	HYtoHY	655575.808	88	103	23386.8203	0.003762803	2466.802685	0.00440419	2887.280415
5	G	1	HY	HYtoHY	602932.608	293	316	94624.2734	0.003096457	1866.954934	0.003339524	2013.507711
5	G	2	HY	HYtoHY	688377.539	272	329	98373.9219	0.00276496	1903.336646	0.003344382	2302.197635
5	G	2	HY	HYtoHY	460499.767	136	151	34530.0664	0.003938597	1813.722788	0.004373001	2013.765743
5	G	2	HY	HYtoHY	591749.348	72	100	21681.2949	0.003320835	1965.101866	0.004612271	2729.308147
5	G	2	HY	HYtoHY	569564.899	90	121	38703.6484	0.002325362	1324.444672	0.00312632	1780.642281
5	G	2	HY	HYtoHY	624145.324	235	277	79601.9688	0.002952188	1842.594516	0.003479813	2171.90928
5	G	2	HY	HYtoHY	229578.826	219	238	43441.1545	0.005041302	1157.376305	0.005478676	1257.787948
5	G	3	HY	HYtoHY	433316.196	100	136	21578.002	0.004634349	2008.13864	0.006302715	2731.068551
5	G	3	HY	HYtoHY	636810.113	144	180	38492.0781	0.00374103	2382.325424	0.004676287	2977.90678
5	G	3	HY	HYtoHY	530499.96	246	257	30378.2188	0.008097907	4295.939503	0.008460009	4488.034358
5	G	3	HY	HYtoHY	681724.181	373	432	103899.875	0.003589995	2447.386193	0.004157849	2834.506261
5	G	3	HY	HYtoHY	645945.865	423	501	106508.117	0.003971528	2565.392278	0.004703867	3038.443336
5	G	1	HS	HStoHS	188133.451	134	147	24744.5801	0.005415327	1018.804212	0.005940695	1117.643427
5	G	1	HS	HStoHS	144122.45	577	659	57583.2773	0.01002027	1444.145897	0.011444295	1649.379803
5	G	1	HS	HStoHS	116800.506	320	320	29537.7207	0.010833605	1265.370551	0.010833605	1265.370551
5	G	1	HS	HStoHS	114278.576	312	317	32364.1113	0.009640308	1101.680667	0.0097948	1119.335806
5	G	2	HS	HStoHS	165634.801	254	269	35636.9734	0.007127429	1180.550295	0.00754834	1250.267832
5	G	2	HS	HStoHS	115896.398	327	343	31232.0788	0.010470004	1213.435788	0.010982298	1272.808793
5	G	2	HS	HStoHS	139874.497	482	517	54990.9922	0.008765072	1226.010022	0.00940154	1315.035646
5	G	2	HS	HStoHS	135709.776	447	493	52679.2695	0.008485311	1151.539694	0.00935852	1270.04266
5	G	2	HS	HStoHS	94096.897	244	250	17365.5352	0.014050819	1322.138512	0.014396331	1354.650115
5	G	3	HS	HStoHS	163256.447	121	124	13574.6133	0.008913698	1455.218624	0.009134699	1491.298425
5	G	3	HS	HStoHS	185260.907	508	574	66822.9922	0.007602174	1408.385612	0.008589858	1591.364845
5	G	3	HS	HStoHS	167964.257	450	482	57618.1758	0.007810036	1311.806814	0.008365416	1405.090855
5	G	3	HS	HStoHS	177659.744	169	180	21148.8789	0.007990967	1419.673207	0.008511089	1512.077972
5	G	3	HS	HStoHS	239741.453	149	169	21926.3652	0.006795472	1629.156323	0.007707616	1847.835024
5	G	1	HY	HStoHY	331079.209	86	92	16139.3828	0.00532858	1764.182207	0.005700342	1887.264687
5	G	1	HY	HStoHY	360487.156	181	510	104252.828	0.001736164	625.8647989	0.004891954	1763.48645
5	G	1	HY	HStoHY	249336.022	514	560	98143.8047	0.005237213	1305.825831	0.005705913	1422.689621
5	G	1	HY	HStoHY	305771.479	683	733	96255.2266	0.007095719	2169.668365	0.007615171	2328.502067
5	G	1	HY	HStoHY	311007.812	673	772	111973.859	0.006010331	1869.260016	0.006894466	2144.232886
5	G	1	HY	HStoHY	313611.934	463	493	102433.242	0.004520017	1417.531288	0.004812891	1509.379967
5	G	1	HY	HStoHY	377842.068	496	620	108570.383	0.004568465	1726.158281	0.005710581	2157.697852
5	G	2	HY	HStoHY	364532.231	396	440	85808.7031	0.004614917	1682.285809	0.005127685	1869.206454
5	G	2	HY	HStoHY	388525.936	354	507	102645.812	0.003448752	1339.92979	0.004939315	1919.051988
5	G	2	HY	HStoHY	327122.568	314	376	92010.25	0.003412663	1116.35917	0.004086501	1336.786777
5	G	2	HY	HStoHY	374921.665	404	452	98309.9062	0.004109454	1540.723194	0.004597706	1723.779415
5	G	2	HY	HStoHY	408224.869	264	340	91987.7188	0.002869948	1171.584281	0.003696146	1508.858544
5	G	2	HY	HStoHY	301084.477	418	454	83861.1016	0.004984432	1500.735251	0.005413714	1629.985177
5	G	3	HY	HStoHY	313805.448	345	417	104830.709	0.00329102	1032.740125	0.003977842	1248.268499
5	G	3	HY	HStoHY	278041.698	470	498	68991.9375	0.00681239	1894.128543	0.007218235	2006.970244
5	G	3	HY	HStoHY	520349.818	221	501	105640.102	0.002092009	1088.576285	0.004742517	2467.767958
5	G	3	HY	HStoHY	401829.53	419	544	95618.5156	0.004381996	1760.815591	0.005689275	2286.118572
5	G	3	HY	HStoHY	211114.847	78	218	27624.4121	0.00282359	596.1016657	0.007891571	1666.027732
5	G	3	HY	HStoHY	169727.735	472	573	57556.7578	0.008200601	1391.869417	0.009955391	1689.705881
5	G	1	HS	HYtoHS	359871.239	518	633	132488.219	0.003909782	1407.017946	0.004777783	1719.386795
5	G	1	HS	HYtoHS	276463.411	307	313	36535.6992	0.008402741	2323.050305	0.008566963	2368.45194
5	G	1	HS	HYtoHS	157015.087	222	222	16382.8584	0.013550749	2127.672013	0.013550749	2127.672013
5	G	1	HS	HYtoHS	293134.781	207	225	24893.3379	0.008315478	2437.555779	0.009038563	2649.517152
5	G	1	HS	HYtoHS	252031.698	293	304	34714.5195	0.008440272	2127.216179	0.008757143	2207.077537
5	G	2	HS	HYtoHS	243614.862	105	155	18164.7559	0.005780424	1408.197316	0.008533008	2078.767467
5	G	2	HS	HYtoHS	235874.286	211	238	38359.2734	0.005500626	1297.456128	0.006204497	1463.48132
5	G	2	HS	HYtoHS	294476.897	95	130	24097.3066	0.003942349	1160.930791	0.005394794	1588.642135
5	G	2	HS	HYtoHS	322554.172	88	106	20604.498	0.004270912	1377.600519	0.005144508	1659.382443
5	G	2	HS	HYtoHS	170641.206	147	165	20997.1289	0.007000957	1194.651774	0.007858217	1340.935664
5	G	2	HS	HYtoHS	277932.456	113	134	24572.0938	0.004598713	1278.131517	0.005453341	1515.660383
5	G	3	HS	HYtoHS	342417.488	254	288	38741.7344	0.006556237	2244.97027	0.007433844	2545.478102
5	G	3	HS	HYtoHS	228665.354	191	253	26397.0645	0.007235653	1654.543164	0.009584399	2191.620002
5	G	3	HS	HYtoHS	363194.276	191	218	31148.9258	0.006131833	2227.046517	0.006998636	2541.864611
5	G	3	HS	HYtoHS	317971.21	168	173	17388.4668	0.009661576	3072.10313	0.009949123	3163.534771
