# Supplementary material for: Multiscale analysis reveals that diet-dependent midgut plasticity emerges from alterations in both stem cell niche coupling and enterocyte size
Source: eLife. 2021 Sep 23;10:e64125. doi: 10.7554/eLife.64125 (PMC8528489; doi:10.7554/eLife.64125)
Supplement: Figure 4—source data 1. [file elife-64125-fig4-data1.csv]

Line	Diet	Day	Repeat	Total.L
CantonS	HY	7	1	6468.585
CantonS	HY	7	1	7318.659
CantonS	HY	7	1	5423.784
CantonS	HY	7	1	7769.052
CantonS	HY	7	1	4973.789
CantonS	HY	7	1	6405.348
CantonS	HY	7	1	6152.445
CantonS	HY	7	1	5540.762
CantonS	HY	7	1	4536.332
CantonS	HY	7	2	4605.96
CantonS	HY	7	2	6419.449
CantonS	HY	7	2	5128.531
CantonS	HY	7	2	6347.869
CantonS	HY	7	2	5044.97
CantonS	HY	7	2	4924.046
CantonS	HY	7	2	5999.181
CantonS	HY	7	2	6139.283
CantonS	HY	7	2	7067.227
CantonS	HY	7	2	6537.941
CantonS	HY	7	3	7186.033
CantonS	HY	7	3	6231.013
CantonS	HY	7	3	5470.743
CantonS	HY	7	3	5516.655
CantonS	HY	7	3	6639.531
CantonS	HY	7	3	6127.984
CantonS	HY	7	3	5799.44
CantonS	HY	7	3	4827.058
CantonS	HY	7	3	6227.517
CantonS	HYtoHS	14	1	4083.881
CantonS	HYtoHS	14	1	4512.202
CantonS	HYtoHS	14	1	4051.075
CantonS	HYtoHS	14	1	4239.595
CantonS	HYtoHS	14	1	4073.106
CantonS	HYtoHS	14	1	4141.119
CantonS	HYtoHS	14	1	4103.374
CantonS	HYtoHS	14	1	3717.118
CantonS	HYtoHS	14	1	3758.006
CantonS	HYtoHS	14	2	5066.536
CantonS	HYtoHS	14	2	3975.257
CantonS	HYtoHS	14	2	4644.925
CantonS	HYtoHS	14	2	4258.76
CantonS	HYtoHS	14	2	4111.337
CantonS	HYtoHS	14	2	4386.405
CantonS	HYtoHS	14	2	3556.529
CantonS	HYtoHS	14	2	5063.012
CantonS	HYtoHS	14	2	5109.693
CantonS	HYtoHS	14	3	4371.741
CantonS	HYtoHS	14	3	4999.78
CantonS	HYtoHS	14	3	4909.958
CantonS	HYtoHS	14	3	5213.296
CantonS	HYtoHS	14	3	4292.353
CantonS	HYtoHS	14	3	5031.905
CantonS	HYtoHS	14	3	4681.809
CantonS	HYtoHS	14	3	4782.095
CantonS	HYtoHS	14	3	5623.334
CantonS	HYtoHStoHY	21	1	4763.018
CantonS	HYtoHStoHY	21	1	6019.94
CantonS	HYtoHStoHY	21	1	5244.063
CantonS	HYtoHStoHY	21	1	5136.883
CantonS	HYtoHStoHY	21	1	5569.722
CantonS	HYtoHStoHY	21	1	5870.242
CantonS	HYtoHStoHY	21	1	5064.171
CantonS	HYtoHStoHY	21	1	6121.676
CantonS	HYtoHStoHY	21	1	5245.081
CantonS	HYtoHStoHY	21	1	5694.272
CantonS	HYtoHStoHY	21	2	6189.023
CantonS	HYtoHStoHY	21	2	4188.683
CantonS	HYtoHStoHY	21	2	5284.551
CantonS	HYtoHStoHY	21	2	5424.893
CantonS	HYtoHStoHY	21	2	6226.802
CantonS	HYtoHStoHY	21	2	5132.62
CantonS	HYtoHStoHY	21	2	5375.999
CantonS	HYtoHStoHY	21	2	5396.009
CantonS	HYtoHStoHY	21	2	4212.483
CantonS	HYtoHStoHY	21	2	5771.686
CantonS	HYtoHStoHY	21	3	7476.327
CantonS	HYtoHStoHY	21	3	5847.549
CantonS	HYtoHStoHY	21	3	5998.892
CantonS	HYtoHStoHY	21	3	5908.236
CantonS	HYtoHStoHY	21	3	5910.426
CantonS	HYtoHStoHY	21	3	6337.829
CantonS	HYtoHStoHY	21	3	4990.756
CantonS	HYtoHStoHY	21	3	4796.197
CantonS	HYtoHStoHY	21	3	4564.318
CantonS	HYtoHStoHY	21	3	6412.596
CantonS	HYtoHStoHY	21	3	5141.399
CantonS	Eclosion	0	1	4683.933
CantonS	Eclosion	0	1	3533.413
CantonS	Eclosion	0	1	4574.121
CantonS	Eclosion	0	1	3942.974
CantonS	Eclosion	0	1	3527.606
CantonS	Eclosion	0	2	3279.695
CantonS	Eclosion	0	2	2596.454
CantonS	Eclosion	0	2	2172.087
CantonS	Eclosion	0	2	2307.99
CantonS	Eclosion	0	2	3217.809
CantonS	Eclosion	0	3	3949.851
CantonS	Eclosion	0	3	3317.271
CantonS	Eclosion	0	3	4275.042
CantonS	Eclosion	0	3	3283.86
CantonS	Eclosion	0	3	3797.846
CantonS	Eclosion	0	3	3220.483
