# Supplementary material for: Multiscale analysis reveals that diet-dependent midgut plasticity emerges from alterations in both stem cell niche coupling and enterocyte size
Source: eLife. 2021 Sep 23;10:e64125. doi: 10.7554/eLife.64125 (PMC8528489; doi:10.7554/eLife.64125)
Supplement: Figure 4—source data 2. [file elife-64125-fig4-data2.csv]

Day	Experiment	Repeat	Diet	Diet1	Post.R.A	Post.RFP	Post.Area	Post.Dapi	Post.RFP.Density	Post.RFP.Number	Post.Dapi.Density	Post.Dapi.Number	Post.Ratio
0	G	1	HS	HS	109468.807	238	62088.0781	256	0.003833264	419.6228465	0.004123175	451.3590282	92.96875
0	G	1	HS	HS	89857.267	294	52131.1016	368	0.005639628	506.7615241	0.007059126	634.3137444	79.89130435
0	G	1	HS	HS	73657.199	548	56107.4688	568	0.009766971	719.4076995	0.010123429	745.6634549	96.47887324
0	G	1	HS	HS	108577.184	417	91850.5312	751	0.004539985	492.9387466	0.008176327	887.7625869	55.52596538
0	G	1	HS	HS	184008.265	374	75175.9375	458	0.004974996	915.4404108	0.006092375	1121.047348	81.65938865
0	S	1	HY	HY	621431.96	181	99120.5	187	0.00182606	1134.772169	0.001886593	1172.388926	96.79144385
0	S	1	HY	HY	491327.86	219	83867.4766	219	0.002611263	1282.986036	0.002611263	1282.986036	100
0	S	1	HY	HY	601467.725	223	94789.9844	227	0.002352569	1414.994459	0.002394768	1440.375525	98.23788546
0	G	1	HS	HS	184623.142	404	65159.5383	523	0.006200167	1144.694258	0.008026453	1481.869052	77.24665392
0	S	1	HY	HY	456693.984	225	74742.0312	244	0.003010354	1374.810729	0.003264562	1490.905857	92.21311475
0	S	1	HY	HY	655904.574	242	104455.828	248	0.002316769	1519.579232	0.002374209	1557.25475	97.58064516
0	S	1	HY	HY	734433.966	245	114507.117	245	0.002139605	1571.398585	0.002139605	1571.398585	100
0	G	1	HS	HS	209038.208	525	78474.5234	621	0.006690069	1398.480098	0.007913396	1654.202173	84.5410628
0	G	1	HS	HS	199852.517	475	59486.8164	494	0.007984963	1595.81486	0.008304361	1659.647454	96.15384615
0	S	1	HY	HY	692247.827	314	98767.75	318	0.003179175	2200.777254	0.003219674	2228.812634	98.74213836
0	G	2	HS	HS	141854.378	375	56361.9141	401	0.006653429	943.818048	0.007114734	1009.256099	93.51620948
0	G	2	HS	HS	131495.116	427	49619.5742	427	0.008605475	1131.577919	0.008605475	1131.577919	100
0	G	2	HS	HS	137643.88	459	56187.4336	478	0.008169086	1124.424749	0.00850724	1170.969564	96.0251046
0	G	2	HS	HS	168256.609	343	51423.8047	358	0.006670063	1122.282126	0.006961756	1171.36152	95.81005587
0	G	2	HS	HS	158367.607	255	50280.4077	399	0.005071558	803.1704919	0.007935497	1256.725593	63.90977444
0	G	2	HS	HS	173898.698	374	60162.4062	508	0.006216507	1081.042418	0.008443811	1468.367776	73.62204724
0	G	2	HS	HS	167660.46	442	50246.707	457	0.008796596	1474.841392	0.009095123	1524.892571	96.71772429
0	G	2	HS	HS	181149.246	365	50476.8203	426	0.007231042	1309.897779	0.008439517	1528.812202	85.68075117
0	S	2	HY	HY	226656.342	306	72463.0078	505	0.004222844	957.1344436	0.006969073	1579.584621	60.59405941
0	S	2	HY	HY	386528.368	461	94058.5547	461	0.004901202	1894.453707	0.004901202	1894.453707	100
0	S	2	HY	HY	531714.107	365	92393.5156	365	0.003950494	2100.533222	0.003950494	2100.533222	100
0	S	2	HY	HY	383735.934	125	100364.594	601	0.001245459	477.9274228	0.005988168	2297.875049	20.79866889
0	S	2	HY	HY	461043.896	613	103264.367	700	0.00593622	2736.857993	0.006778718	3125.286452	87.57142857
14	G	1	HS	HStoHS	87563.185	58	54046.0039	121	0.00107316	93.96929215	0.002238833	196.0393853	47.9338843
14	G	1	HS	HStoHS	106281.022	21	41737.0234	100	0.00050315	53.47533868	0.002395954	254.6444699	21
14	G	1	HS	HStoHS	173652.124	30	35954.4297	123	0.00083439	144.8935156	0.003420997	594.0634139	24.3902439
14	G	1	HS	HStoHS	159240.503	226	64838.293	349	0.003485595	555.0478276	0.005382622	857.1313799	64.75644699
14	G	1	HS	HStoHS	188231.249	162	35940.0703	164	0.004507504	848.4530521	0.004563152	858.9277811	98.7804878
14	G	1	HS	HStoHS	94756.511	285	35333.0781	339	0.008066096	764.3151145	0.009594409	909.1327152	84.07079646
14	S	1	HS	HYtoHS	125777.077	264	53731.5391	465	0.004913315	617.9824528	0.008654135	1088.49182	56.77419355
14	S	1	HS	HYtoHS	124858.404	0	68082.4421	619	0	0	0.009091918	1135.202406	0
14	S	1	HS	HYtoHS	121317.923	347	68200.4917	648	0.00508794	617.2582958	0.009501398	1152.689843	53.54938272
14	G	1	HS	HStoHS	205310.455	150	38474.9297	231	0.003898643	800.4320863	0.00600391	1232.665413	64.93506494
14	S	1	HS	HYtoHS	135370.606	354	74339.625	702	0.004761929	644.6251851	0.009443147	1278.32452	50.42735043
14	G	1	HY	HStoHY	406394.806	126	75940.2656	253	0.001659199	674.2897875	0.003331566	1353.931081	49.80237154
14	S	1	HS	HYtoHS	126948.568	453	62653.5938	687	0.007230232	917.8675606	0.010965053	1391.997824	65.93886463
14	G	1	HY	HStoHY	509236.265	93	63576.6484	188	0.001462801	744.911439	0.002957061	1505.842479	49.46808511
14	S	1	HS	HYtoHS	203803.956	300	86086.875	653	0.003484852	710.2265798	0.007585361	1545.926522	45.94180704
14	S	1	HY	HYtoHY	307364.332	326	106015.984	545	0.003075008	945.1477829	0.005140734	1580.078349	59.81651376
14	S	1	HS	HYtoHS	146854.541	236	61438.0117	664	0.00384127	564.1079637	0.010807641	1587.15122	35.54216867
14	S	1	HY	HYtoHY	492544.087	284	143318.602	496	0.001981599	976.0248757	0.003460821	1704.606825	57.25806452
14	S	1	HY	HYtoHY	367130.11	327	100983.953	480	0.003238138	1188.818049	0.00475323	1745.054017	68.125
14	S	1	HS	HYtoHS	205790.08	335	68040.7656	580	0.004923519	1013.211362	0.008524301	1754.216687	57.75862069
14	S	1	HS	HYtoHS	189407.941	216	73927.8516	690	0.002921768	553.4059812	0.009333424	1767.824662	31.30434783
14	S	1	HY	HYtoHY	294080.504	441	109537.906	665	0.004026004	1183.969157	0.006070958	1785.350317	66.31578947
14	G	1	HY	HStoHY	502007.566	0	123036.742	443	0	0	0.00360055	1807.503581	0
14	G	1	HY	HStoHY	530056.75	152	81533.4219	281	0.001864266	988.1668661	0.003446439	1826.808483	54.09252669
14	S	1	HY	HYtoHY	500372.057	273	119731.375	459	0.002280104	1140.900383	0.003833582	1918.217127	59.47712418
14	S	1	HY	HYtoHY	515187.353	282	113776.695	435	0.002478539	1276.912056	0.003823279	1969.704767	64.82758621
14	G	1	HY	HStoHY	573925.216	237	90852.6953	327	0.002608618	1497.151799	0.003599233	2065.690457	72.47706422
14	G	1	HY	HStoHY	335514.434	89	72038.0703	451	0.001235458	414.5139438	0.006260579	2100.514479	19.73392461
14	G	1	HY	HStoHY	454848.314	11	108451.336	530	0.000101428	46.13434595	0.004886985	2222.836669	2.075471698
14	S	1	HY	HYtoHY	514517.335	215	126367.836	560	0.001701382	875.390689	0.004431507	2280.087376	38.39285714
14	G	1	HY	HStoHY	550924.052	0	76487.8359	335	0	0	0.004379781	2412.926909	0
14	S	1	HY	HYtoHY	437369.594	43	149182.75	824	0.000288237	126.0661339	0.005523427	2415.778939	5.218446602
14	G	1	HY	HStoHY	500233.684	167	90807.8299	463	0.001839048	919.9539877	0.005098679	2550.531116	36.06911447
14	S	1	HY	HYtoHY	515802.229	375	133185.547	706	0.002815621	1452.303499	0.005300875	2734.203387	53.11614731
14	S	1	HY	HYtoHY	504705.323	421	120539.172	654	0.003492641	1762.754277	0.005425622	2738.340373	64.37308869
14	S	1	HY	HYtoHY	435842.287	156	95363.2734	605	0.00163585	712.9725559	0.006344161	2765.053822	25.78512397
14	S	1	HY	HYtoHY	549291.665	0	149023.422	952	0	0	0.006388258	3509.016623	0
14	S	1	HY	HYtoHY	540457.628	24	106140.812	715	0.000226115	122.2054253	0.006736334	3640.703295	3.356643357
14	G	2	HS	HStoHS	60983.046	356	54293.0664	418	0.006557007	399.866241	0.007698957	469.5058673	85.16746411
14	G	2	HS	HStoHS	129653.608	285	73009.9844	301	0.003903576	506.1126719	0.004122724	534.5260149	94.68438538
14	G	2	HS	HStoHS	119421.274	59	29269.119	137	0.002015776	240.7265885	0.004680701	558.9752988	43.06569343
14	S	2	HS	HYtoHS	74021.339	44	58903.5508	500	0.000746984	55.29274334	0.008488453	628.3266288	8.8
14	S	2	HS	HYtoHS	80171.143	29	60381.5547	542	0.000480279	38.50452607	0.008976251	719.6363148	5.350553506
14	G	2	HY	HStoHY	689067.324	40	102591.375	108	0.000389896	268.6648167	0.00105272	725.3950051	37.03703704
14	S	2	HS	HYtoHS	88239.445	0	88991.8328	762	0	0	0.008562584	755.5576166	0
14	G	2	HS	HStoHS	95243.418	368	61313.9805	539	0.006001894	571.6408809	0.008790817	837.2674859	68.27458256
14	S	2	HS	HYtoHS	176229.194	105	75392.0938	424	0.001392719	245.4377434	0.005623932	991.1009827	24.76415094
14	S	2	HS	HYtoHS	147866.85	0	88069.375	660	0	0	0.007494092	1108.12778	0
14	S	2	HY	HYtoHY	343210.273	44	122066.031	409	0.000360461	123.7137956	0.003350646	1149.975964	10.75794621
14	S	2	HS	HYtoHS	161719.776	17	80601	600	0.000210915	34.10920698	0.007444076	1203.854364	2.833333333
14	G	2	HY	HStoHY	439374.445	201	105042.875	300	0.001913504	840.7449191	0.002855977	1254.843163	67
14	S	2	HS	HYtoHS	118825.124	638	85060.3281	950	0.007500559	891.25484	0.011168544	1327.103602	67.15789474
14	S	2	HY	HYtoHY	497227.968	159	120271.57	322	0.001322008	657.3394437	0.002677274	1331.215729	49.37888199
14	G	2	HS	HStoHS	177711.764	105	41191.6484	320	0.00254906	452.9980213	0.007768565	1380.565398	32.8125
14	G	2	HY	HStoHY	435398.036	3	114346.602	368	2.62E-05	11.42311258	0.003218285	1401.235143	0.815217391
14	G	2	HY	HStoHY	349819.934	0	111868.969	454	0	0	0.004058319	1419.681002	0
14	S	2	HS	HYtoHS	289801.339	0	96375.4688	474	0	0	0.004918264	1425.319497	0
14	G	2	HY	HStoHY	475209.983	0	96702.0938	292	0	0	0.003019583	1434.935993	0
14	S	2	HS	HYtoHS	167526.248	299	96757.9297	853	0.003090186	517.6872666	0.008815815	1476.880396	35.05275498
14	S	2	HY	HYtoHY	799245.684	76	150305.219	280	0.000505638	404.1288279	0.001862876	1488.895682	27.14285714
14	S	2	HY	HYtoHY	525930.523	0	140768.391	404	0	0	0.002869962	1509.400866	0
14	G	2	HY	HStoHY	731491.715	192	106211.797	222	0.001807709	1322.32401	0.002090163	1528.937136	86.48648649
14	S	2	HS	HYtoHS	269919.295	0	105027.727	718	0	0	0.00683629	1845.246578	0
14	G	2	HY	HStoHY	505797.743	0	89352.9609	329	0	0	0.003682027	1862.360864	0
14	G	2	HS	HStoHS	209630.196	158	42966.5664	392	0.003677278	770.8684622	0.009123373	1912.534413	40.30612245
14	G	2	HY	HStoHY	472350.964	0	112920.641	466	0	0	0.004126792	1949.294188	0
14	S	2	HY	HYtoHY	716558.854	205	137728.031	379	0.001488441	1066.555326	0.0027518	1971.826677	54.08970976
14	S	2	HY	HYtoHY	666377.24	0	153427.922	479	0	0	0.003121987	2080.421176	0
14	G	2	HY	HStoHY	474789.661	0	119070.945	522	0	0	0.004383941	2081.44987	0
14	S	2	HY	HYtoHY	793280.03	230	121549.969	370	0.001892226	1501.065022	0.003044016	2414.756775	62.16216216
14	S	2	HY	HYtoHY	613953.565	0	156485.234	734	0	0	0.004690538	2879.772776	0
14	G	2	HY	HStoHY	669187.361	26	84083.6328	390	0.000309216	206.9234024	0.004638239	3103.851036	6.666666667
14	S	2	HY	HYtoHY	909467.741	65	124685.641	547	0.000521311	474.1155653	0.004387033	3989.864834	11.88299817
0	G	3	HS	HS	122821.301	627	58116.293	650	0.010788713	1325.083755	0.011184471	1373.691293	96.46153846
0	G	3	HS	HS	107286.048	620	69631.2344	676	0.00890405	955.280347	0.009708287	1041.563733	91.71597633
0	G	3	HS	HS	154696.036	497	73548.5781	664	0.006757439	1045.348964	0.009028047	1396.603042	74.84939759
0	G	3	HS	HS	124129.084	558	73352.3594	602	0.007607117	944.2644986	0.008206962	1018.722631	92.6910299
0	G	3	HS	HS	147245.731	560	61140.4957	581	0.009159232	1348.657848	0.009502703	1399.232517	96.38554217
0	G	3	HS	HS	140191.819	865	83680.8359	921	0.010336895	1449.148089	0.011006104	1542.965769	93.91965255
0	G	3	HS	HS	156541.705	674	80450.2422	722	0.008377849	1311.482803	0.008974491	1404.882172	93.35180055
0	G	3	HS	HS	180566.622	722	80796.6172	783	0.008936018	1613.546527	0.009691	1749.871095	92.20945083
0	S	3	HY	HY	578879.6	393	117167.203	425	0.003354181	1941.666925	0.003627295	2099.767031	92.47058824
0	S	3	HY	HY	571236.822	328	115086.195	350	0.002850038	1628.046506	0.003041199	1737.244747	93.71428571
0	S	3	HY	HY	481986.108	353	115504.353	398	0.003056162	1473.027567	0.003445758	1660.807286	88.69346734
0	S	3	HY	HY	549956.48	403	130165.734	489	0.003096053	1702.694362	0.003756749	2066.048494	82.41308793
0	S	3	HY	HY	533259.101	445	119768.07	499	0.003715514	1981.331919	0.004166386	2221.763208	89.17835671
0	S	3	HY	HY	496065.841	361	121767.32	478	0.002964671	1470.67184	0.00392552	1947.316176	75.52301255
0	S	3	HY	HY	513665.248	403	131637.359	481	0.003061441	1572.555819	0.003653978	1876.921462	83.78378378
0	S	3	HY	HY	567132.444	358	118854.586	393	0.003012084	1708.250576	0.003306562	1875.258313	91.09414758
0	S	3	HY	HY	466953.368	383	126882.898	473	0.003018531	1409.51336	0.003727847	1740.730599	80.97251586
14	S	3	HY	HYtoHY	468923.886	164	108440.172	448	0.001512355	709.1792265	0.00413131	1937.270082	36.60714286
14	S	3	HY	HYtoHY	526145.886	220	86830.4609	360	0.002533673	1333.08166	0.00414601	2181.406352	61.11111111
14	S	3	HY	HYtoHY	507387.474	134	93097.6172	336	0.001439349	730.3078592	0.003609115	1831.219707	39.88095238
14	S	3	HY	HYtoHY	485906.335	246	96891.3281	379	0.002538927	1233.680668	0.003911599	1900.670623	64.90765172
14	S	3	HY	HYtoHY	471626.845	191	85989.5625	341	0.0022212	1047.577459	0.003965598	1870.28227	56.01173021
14	S	3	HY	HYtoHY	600557.375	2	124049.328	758	1.61E-05	9.68255749	0.006110472	3669.689289	0.263852243
14	S	3	HY	HYtoHY	442771.351	56	112771.281	771	0.00049658	219.8715439	0.006836847	3027.160006	7.263294423
14	S	3	HY	HYtoHY	607986.871	2	117900.625	877	1.70E-05	10.31354789	0.007438468	4522.490749	0.228050171
14	S	3	HY	HYtoHY	558832.133	104	175360.266	696	0.000593065	331.4236637	0.003968972	2217.989134	14.94252874
14	S	3	HY	HYtoHY	389015.964	206	98917.1033	414	0.002082552	810.1459294	0.004185323	1628.157353	49.75845411
14	S	3	HY	HYtoHY	538007.486	232	117600.32	472	0.001972784	1061.372424	0.004013595	2159.343898	49.15254237
14	G	3	HY	HStoHY	595109.84	246	120473.57	374	0.002041942	1215.179567	0.003104415	1847.468122	65.77540107
14	G	3	HY	HStoHY	582812.312	257	98790.8796	689	0.002601455	1516.15984	0.006974328	4064.72424	37.30043541
14	G	3	HY	HStoHY	496732.738	228	91568.5703	528	0.002489937	1236.83338	0.005766171	2864.245721	43.18181818
14	G	3	HY	HStoHY	582709.313	78	107270.055	547	0.000727137	423.7093606	0.00509928	2971.397695	14.25959781
14	G	3	HY	HStoHY	495964.922	69	103512.43	750	0.000666587	330.603577	0.007245507	3593.517141	9.2
14	G	3	HY	HStoHY	487952.802	282	96437.68	455	0.002924168	1426.856081	0.004718073	2302.196869	61.97802198
14	G	3	HY	HStoHY	580764.805	140	123348.219	671	0.001134998	659.1669775	0.005439884	3159.293157	20.86438152
14	G	3	HY	HStoHY	456722.075	1	98687.1875	643	1.01E-05	4.627977416	0.006515537	2975.789478	0.155520995
14	G	3	HY	HStoHY	742339.966	271	134130.344	569	0.002020423	1499.840564	0.004242142	3149.111738	47.62741652
14	G	3	HY	HStoHY	432367.351	56	110350.484	735	0.000507474	219.4151831	0.006660596	2879.824279	7.619047619
14	G	3	HY	HStoHY	552340.037	357	132105.766	641	0.00270238	1492.632753	0.004852173	2680.049285	55.69422777
14	S	3	HS	HYtoHS	203166.191	401	75651.9219	821	0.005300592	1076.901162	0.010852335	2204.827566	48.84287454
14	S	3	HS	HYtoHS	166822.938	291	54578.2188	554	0.005331797	889.4660915	0.010150569	1693.347817	52.52707581
14	S	3	HS	HYtoHS	174952.624	219	63466.1758	645	0.003450657	603.7014862	0.010162894	1778.024925	33.95348837
14	S	3	HS	HYtoHS	97071.401	40	44606.4883	438	0.000896731	87.0468891	0.009819199	953.1634356	9.132420091
14	S	3	HS	HYtoHS	165795.023	412	50167.7422	585	0.008212449	1361.583091	0.01166088	1933.315796	70.42735043
14	S	3	HS	HYtoHS	198749.693	387	70045.4023	714	0.005524988	1098.089649	0.010193389	2025.93284	54.20168067
14	S	3	HS	HYtoHS	140872.241	442	52311.7617	620	0.008449343	1190.277836	0.011852019	1669.620494	71.29032258
14	S	3	HS	HYtoHS	163107.67	487	67098.7671	733	0.007257958	1183.828537	0.010924195	1781.819954	66.43929059
14	S	3	HS	HYtoHS	242678.502	253	51463.6875	280	0.004916088	1193.028793	0.005440729	1320.348072	90.35714286
14	S	3	HS	HYtoHS	187928.492	490	52145.6562	524	0.009396756	1765.918157	0.010048776	1888.451253	93.51145038
14	S	3	HS	HYtoHS	152205.318	274	42354.1875	355	0.006469254	984.6548734	0.008381698	1275.738978	77.18309859
14	G	3	HS	HStoHS	103766.375	282	22880.3268	307	0.012324999	1278.920446	0.013417641	1392.299918	91.85667752
14	G	3	HS	HStoHS	64866.859	379	27820.6289	409	0.013622985	883.6802234	0.014701321	953.628526	92.66503667
14	G	3	HS	HStoHS	89288.168	444	27374.7559	448	0.016219323	1448.193611	0.016365443	1461.2404	99.10714286
14	G	3	HS	HStoHS	87965.82	128	24256.0338	247	0.005277038	464.198931	0.010183033	895.7588746	51.82186235
14	G	3	HS	HStoHS	77618.002	560	41329.2383	639	0.01354973	1051.702933	0.015461209	1200.068168	87.63693271
14	G	3	HS	HStoHS	79711.286	426	42356.9805	579	0.010057374	801.6862259	0.01366953	1089.615786	73.57512953
14	G	3	HS	HStoHS	99867.996	597	43695.3984	651	0.013662766	1364.473052	0.014898594	1487.892725	91.70506912
14	G	3	HS	HStoHS	95499.356	587	49699.7344	771	0.011810928	1127.936047	0.015513161	1481.496921	76.13488975
