# Supplementary material for: Multiscale analysis reveals that diet-dependent midgut plasticity emerges from alterations in both stem cell niche coupling and enterocyte size
Source: eLife. 2021 Sep 23;10:e64125. doi: 10.7554/eLife.64125 (PMC8528489; doi:10.7554/eLife.64125)
Supplement: Figure 4—source data 3. [file elife-64125-fig4-data3.csv]

Diet1	Experiment	Experiment2	GL	Cellnumber	Cellnumberx2	Daily	Initial Cell Dapi	Initial Cell Dapix2	RelativeRate	Repeat
HStoHS	Growth	HS	Gain	141.1507356	282.3014713	20.16439081	1079.483105	2158.966211	0.009339836	1
HStoHY	Growth	HY	Gain	1277.938506	2555.877011	182.5626436	1079.483105	2158.966211	0.084560213	1
HYtoHS	Shrinkage	HS	Gain	770.1852889	1540.370578	110.0264698	1534.874616	3069.749232	0.035842169	1
HYtoHY	Shrinkage	HY	Gain	1442.188572	2884.377144	206.0269389	1534.874616	3069.749232	0.067115234	1
HStoHS	Growth	HS	Loss	-520.2617612	-1040.523522	-74.32310874	1079.483105	2158.966211	-0.034425323	1
HStoHY	Growth	HY	Loss	-374.4676939	-748.9353878	-53.49538485	1079.483105	2158.966211	-0.024778241	1
HYtoHS	Shrinkage	HS	Loss	-893.7459602	-1787.49192	-127.6779943	1534.874616	3069.749232	-0.041592321	1
HYtoHY	Shrinkage	HY	Loss	-608.8943255	-1217.788651	-86.98490364	1534.874616	3069.749232	-0.028336159	1
HStoHS	Growth	HS	Gain	389.2120654	778.4241308	55.60172363	1282.745406	2565.490811	0.021672938	2
HStoHY	Growth	HY	Gain	1373.73076	2747.461521	196.2472515	1282.745406	2565.490811	0.076495012	2
HYtoHS	Shrinkage	HS	Gain	908.1088503	1816.217701	129.7298358	2199.54661	4399.093221	0.029490131	2
HYtoHY	Shrinkage	HY	Gain	1458.23016	2916.46032	208.3185943	2199.54661	4399.093221	0.047354894	2
HStoHS	Growth	HS	Loss	-723.0617247	-1446.123449	-103.2945321	1282.745406	2565.490811	-0.040263068	2
HStoHY	Growth	HY	Loss	-980.2778258	-1960.555652	-140.0396894	1282.745406	2565.490811	-0.054585925	2
HYtoHS	Shrinkage	HS	Loss	-1959.540085	-3919.080169	-279.9342978	2199.54661	4399.093221	-0.063634546	2
HYtoHY	Shrinkage	HY	Loss	-1567.095606	-3134.191213	-223.8708009	2199.54661	4399.093221	-0.050890215	2
HStoHS	Growth	HS	Gain	94.19200028	188.3840006	13.45600004	1365.941532	2731.883063	0.00492554	3
HStoHY	Growth	HY	Gain	1956.805447	3913.610894	279.5436353	1365.941532	2731.883063	0.102326355	3
HYtoHS	Shrinkage	HS	Gain	481.3023076	962.6046151	68.75747251	1913.984146	3827.968293	0.017961871	3
HYtoHY	Shrinkage	HY	Gain	1661.06439	3322.128779	237.2949128	1913.984146	3827.968293	0.06198978	3
HStoHS	Growth	HS	Loss	-214.8833671	-429.7667341	-30.69762387	1365.941532	2731.883063	-0.0112368	3
HStoHY	Growth	HY	Loss	-369.3271856	-738.6543712	-52.76102652	1365.941532	2731.883063	-0.019313062	3
HYtoHS	Shrinkage	HS	Loss	-711.2327147	-1422.465429	-101.6046735	1913.984146	3827.968293	-0.026542716	3
HYtoHY	Shrinkage	HY	Loss	-1125.441312	-2250.882624	-160.7773303	1913.984146	3827.968293	-0.042000695	3
