# Supplementary material for: Multiscale analysis reveals that diet-dependent midgut plasticity emerges from alterations in both stem cell niche coupling and enterocyte size
Source: eLife. 2021 Sep 23;10:e64125. doi: 10.7554/eLife.64125 (PMC8528489; doi:10.7554/eLife.64125)
Supplement: Figure 5—figure supplement 1—source data 1. [file elife-64125-fig5-figsupp1-data1.csv]

Genotype	Treatment	Sex	Repeat	Internal ID	TimeToDeath	Censor
1	HS	F	1	1	3	1
1	HS	F	1	2	6	1
1	HS	F	1	3	18	1
1	HS	F	1	4	21	1
1	HS	F	1	5	27	1
1	HS	F	1	6	27	1
1	HS	F	1	7	27	1
1	HS	F	1	8	30	1
1	HS	F	1	9	30	1
1	HS	F	1	10	33	1
1	HS	F	1	11	33	1
1	HS	F	1	12	36	1
1	HS	F	1	13	36	1
1	HS	F	1	14	36	1
1	HS	F	1	15	36	1
1	HS	F	1	16	42	1
1	HS	F	1	17	45	1
1	HS	F	1	18	45	1
1	HS	F	1	19	51	1
1	HS	F	1	20	51	1
1	HS	F	1	21	54	1
1	HS	F	1	22	66	1
2	HS	F	1	1	3	1
2	HS	F	1	2	12	1
2	HS	F	1	3	21	1
2	HS	F	1	4	21	1
2	HS	F	1	5	27	1
2	HS	F	1	6	30	1
2	HS	F	1	7	30	1
2	HS	F	1	8	33	1
2	HS	F	1	9	33	1
2	HS	F	1	10	33	1
2	HS	F	1	11	33	1
2	HS	F	1	12	33	1
2	HS	F	1	13	36	1
2	HS	F	1	14	36	1
2	HS	F	1	15	36	1
2	HS	F	1	16	36	1
2	HS	F	1	17	39	1
2	HS	F	1	18	45	1
2	HS	F	1	19	45	1
2	HS	F	1	20	45	1
2	HS	F	1	21	45	1
2	HS	F	1	22	48	1
2	HS	F	1	23	51	1
2	HS	F	1	24	51	1
2	HS	F	1	25	54	1
2	HS	F	1	26	54	1
1	HY	F	1	1	3	1
1	HY	F	1	2	3	1
1	HY	F	1	3	6	1
1	HY	F	1	4	12	1
1	HY	F	1	5	33	1
1	HY	F	1	6	39	1
1	HY	F	1	7	42	1
1	HY	F	1	8	42	1
1	HY	F	1	9	45	1
1	HY	F	1	10	48	1
1	HY	F	1	11	48	1
1	HY	F	1	12	51	1
1	HY	F	1	13	54	1
1	HY	F	1	14	54	1
1	HY	F	1	15	54	1
1	HY	F	1	16	54	1
1	HY	F	1	17	57	1
1	HY	F	1	18	57	1
1	HY	F	1	19	57	1
1	HY	F	1	20	60	1
1	HY	F	1	21	60	1
1	HY	F	1	22	60	1
1	HY	F	1	23	60	1
1	HY	F	1	24	63	1
1	HY	F	1	25	63	1
1	HY	F	1	26	66	1
1	HY	F	1	27	66	1
1	HY	F	1	28	69	1
2	HY	F	1	1	3	1
2	HY	F	1	2	3	1
2	HY	F	1	3	6	1
2	HY	F	1	4	6	1
2	HY	F	1	5	6	1
2	HY	F	1	6	9	1
2	HY	F	1	7	12	1
2	HY	F	1	8	21	1
2	HY	F	1	9	24	1
2	HY	F	1	10	24	1
2	HY	F	1	11	33	1
2	HY	F	1	12	36	1
2	HY	F	1	13	39	1
2	HY	F	1	14	42	1
2	HY	F	1	15	42	1
2	HY	F	1	16	48	1
2	HY	F	1	17	51	1
2	HY	F	1	18	51	1
2	HY	F	1	19	51	1
2	HY	F	1	20	51	1
2	HY	F	1	21	54	1
2	HY	F	1	22	54	1
2	HY	F	1	23	57	1
2	HY	F	1	24	57	1
2	HY	F	1	25	57	1
2	HY	F	1	26	57	1
2	HY	F	1	27	57	1
1	HS	F	2	1	3	1
1	HS	F	2	2	3	1
1	HS	F	2	3	15	1
1	HS	F	2	4	15	1
1	HS	F	2	5	15	1
1	HS	F	2	6	21	1
1	HS	F	2	7	21	1
1	HS	F	2	8	21	1
1	HS	F	2	9	27	1
1	HS	F	2	10	27	1
1	HS	F	2	11	30	1
1	HS	F	2	12	30	1
1	HS	F	2	13	30	1
1	HS	F	2	14	30	1
1	HS	F	2	15	30	1
1	HS	F	2	16	30	1
1	HS	F	2	17	30	1
1	HS	F	2	18	33	1
1	HS	F	2	19	33	1
1	HS	F	2	20	33	1
1	HS	F	2	21	36	1
1	HS	F	2	22	36	1
1	HS	F	2	23	36	1
1	HS	F	2	24	36	1
1	HS	F	2	25	36	1
1	HS	F	2	26	36	1
1	HS	F	2	27	36	1
1	HS	F	2	28	36	1
1	HS	F	2	29	36	1
1	HS	F	2	30	42	1
1	HS	F	2	31	42	1
1	HS	F	2	32	42	1
2	HS	F	2	1	3	1
2	HS	F	2	2	18	1
2	HS	F	2	3	21	1
2	HS	F	2	4	21	1
2	HS	F	2	5	21	1
2	HS	F	2	6	21	1
2	HS	F	2	7	21	1
2	HS	F	2	8	24	1
2	HS	F	2	9	24	1
2	HS	F	2	10	24	1
2	HS	F	2	11	27	1
2	HS	F	2	12	27	1
2	HS	F	2	13	30	1
2	HS	F	2	14	30	1
2	HS	F	2	15	30	1
2	HS	F	2	16	30	1
2	HS	F	2	17	30	1
2	HS	F	2	18	33	1
2	HS	F	2	19	33	1
2	HS	F	2	20	33	1
2	HS	F	2	21	33	1
2	HS	F	2	22	45	1
2	HS	F	2	23	75	1
1	HY	F	2	1	3	1
1	HY	F	2	2	3	1
1	HY	F	2	3	18	1
1	HY	F	2	4	24	1
1	HY	F	2	5	24	1
1	HY	F	2	6	27	1
1	HY	F	2	7	30	1
1	HY	F	2	8	33	1
1	HY	F	2	9	45	1
1	HY	F	2	10	45	1
1	HY	F	2	11	48	1
1	HY	F	2	12	51	1
1	HY	F	2	13	51	1
1	HY	F	2	14	54	1
1	HY	F	2	15	54	1
1	HY	F	2	16	57	1
1	HY	F	2	17	57	1
1	HY	F	2	18	57	1
1	HY	F	2	19	57	1
1	HY	F	2	20	60	1
1	HY	F	2	21	60	1
1	HY	F	2	22	60	1
1	HY	F	2	23	60	1
1	HY	F	2	24	60	1
1	HY	F	2	25	60	1
1	HY	F	2	26	63	1
1	HY	F	2	27	63	1
1	HY	F	2	28	63	1
2	HY	F	2	1	39	1
2	HY	F	2	2	45	1
2	HY	F	2	3	45	1
2	HY	F	2	4	51	1
2	HY	F	2	5	51	1
2	HY	F	2	6	51	1
2	HY	F	2	7	51	1
2	HY	F	2	8	57	1
2	HY	F	2	9	57	1
2	HY	F	2	10	57	1
2	HY	F	2	11	57	1
2	HY	F	2	12	60	1
2	HY	F	2	13	60	1
2	HY	F	2	14	60	1
2	HY	F	2	15	60	1
2	HY	F	2	16	60	1
2	HY	F	2	17	63	1
2	HY	F	2	18	63	1
2	HY	F	2	19	63	1
2	HY	F	2	20	63	1
2	HY	F	2	21	66	1
2	HY	F	2	22	66	1
2	HY	F	2	23	66	1
2	HY	F	2	24	66	1
2	HY	F	2	25	69	1
1	HS	F	3	1	6	1
1	HS	F	3	2	6	1
1	HS	F	3	3	21	1
1	HS	F	3	4	21	1
1	HS	F	3	5	27	1
1	HS	F	3	6	27	1
1	HS	F	3	7	30	1
1	HS	F	3	8	30	1
1	HS	F	3	9	30	1
1	HS	F	3	10	30	1
1	HS	F	3	11	30	1
1	HS	F	3	12	30	1
1	HS	F	3	13	33	1
1	HS	F	3	14	33	1
1	HS	F	3	15	33	1
1	HS	F	3	16	33	1
1	HS	F	3	17	33	1
1	HS	F	3	18	36	1
1	HS	F	3	19	36	1
1	HS	F	3	20	36	1
1	HS	F	3	21	36	1
1	HS	F	3	22	36	1
1	HS	F	3	23	36	1
1	HS	F	3	24	36	1
1	HS	F	3	25	39	1
1	HS	F	3	26	42	1
2	HS	F	3	1	18	1
2	HS	F	3	2	21	1
2	HS	F	3	3	21	1
2	HS	F	3	4	27	1
2	HS	F	3	5	27	1
2	HS	F	3	6	27	1
2	HS	F	3	7	27	1
2	HS	F	3	8	30	1
2	HS	F	3	9	30	1
2	HS	F	3	10	30	1
2	HS	F	3	11	30	1
2	HS	F	3	12	30	1
2	HS	F	3	13	30	1
2	HS	F	3	14	33	1
2	HS	F	3	15	33	1
2	HS	F	3	16	33	1
2	HS	F	3	17	33	1
2	HS	F	3	18	36	1
2	HS	F	3	19	36	1
2	HS	F	3	20	36	1
2	HS	F	3	21	39	1
2	HS	F	3	22	45	1
2	HS	F	3	23	48	1
2	HS	F	3	24	72	1
1	HY	F	3	1	6	1
1	HY	F	3	2	42	1
1	HY	F	3	3	42	1
1	HY	F	3	4	48	1
1	HY	F	3	5	51	1
1	HY	F	3	6	54	1
1	HY	F	3	7	54	1
1	HY	F	3	8	54	1
1	HY	F	3	9	54	1
1	HY	F	3	10	54	1
1	HY	F	3	11	54	1
1	HY	F	3	12	57	1
1	HY	F	3	13	57	1
1	HY	F	3	14	57	1
1	HY	F	3	15	57	1
1	HY	F	3	16	57	1
1	HY	F	3	17	57	1
1	HY	F	3	18	57	1
1	HY	F	3	19	57	1
1	HY	F	3	20	57	1
1	HY	F	3	21	60	1
1	HY	F	3	22	60	1
1	HY	F	3	23	60	1
1	HY	F	3	24	60	1
1	HY	F	3	25	60	1
1	HY	F	3	26	66	1
2	HY	F	3	1	12	1
2	HY	F	3	2	15	1
2	HY	F	3	3	27	1
2	HY	F	3	4	48	1
2	HY	F	3	5	57	1
2	HY	F	3	6	57	1
2	HY	F	3	7	57	1
2	HY	F	3	8	60	1
2	HY	F	3	9	60	1
2	HY	F	3	10	60	1
2	HY	F	3	11	60	1
2	HY	F	3	12	60	1
2	HY	F	3	13	60	1
2	HY	F	3	14	60	1
2	HY	F	3	15	63	1
2	HY	F	3	16	63	1
2	HY	F	3	17	63	1
2	HY	F	3	18	63	1
2	HY	F	3	19	63	1
2	HY	F	3	20	63	1
2	HY	F	3	21	66	1
2	HY	F	3	22	69	1
