# Supplementary material for: Multiscale analysis reveals that diet-dependent midgut plasticity emerges from alterations in both stem cell niche coupling and enterocyte size
Source: eLife. 2021 Sep 23;10:e64125. doi: 10.7554/eLife.64125 (PMC8528489; doi:10.7554/eLife.64125)
Supplement: Figure 5—figure supplement 2—source data 1. [file elife-64125-fig5-figsupp2-data1.csv]

Cross	Female.Line	CrossNumber	Repeat	Diet1	Day	Diet	Group	C.G	Male.Line.ID	Male.Line	Gene	Total.PH3
Act X 1 P2 R1	Act	1	1	HYtoHS	7	HYtoHS D7	S	HS	32371	Ampk-IR	AmpK	12
Act X 1 P2 R1	Act	1	1	HYtoHS	7	HYtoHS D7	S	HS	32371	Ampk-IR	AmpK	4
Act X 1 P2 R1	Act	1	1	HYtoHS	7	HYtoHS D7	S	HS	32371	Ampk-IR	AmpK	6
Act X 1 P2 R1	Act	1	1	HYtoHS	7	HYtoHS D7	S	HS	32371	Ampk-IR	AmpK	1
Act X 1 P2 R1	Act	1	1	HYtoHS	7	HYtoHS D7	S	HS	32371	Ampk-IR	AmpK	2
Act X 1 P2 R1	Act	1	1	HYtoHS	7	HYtoHS D7	S	HS	32371	Ampk-IR	AmpK	14
Act X 1 P2 R1	Act	1	1	HYtoHS	7	HYtoHS D7	S	HS	32371	Ampk-IR	AmpK	3
Act X 1 P2 R1	Act	1	1	HYtoHS	7	HYtoHS D7	S	HS	32371	Ampk-IR	AmpK	4
Act X 8 P2 R1	Act	8	1	HYtoHS	7	HYtoHS D7	S	HS	67215	Gcn2-IR	Gcn2	30
Act X 8 P2 R1	Act	8	1	HYtoHS	7	HYtoHS D7	S	HS	67215	Gcn2-IR	Gcn2	7
Act X 8 P2 R1	Act	8	1	HYtoHS	7	HYtoHS D7	S	HS	67215	Gcn2-IR	Gcn2	20
Act X 8 P2 R1	Act	8	1	HYtoHS	7	HYtoHS D7	S	HS	67215	Gcn2-IR	Gcn2	30
Act X 8 P2 R1	Act	8	1	HYtoHS	7	HYtoHS D7	S	HS	67215	Gcn2-IR	Gcn2	35
Act X 8 P2 R1	Act	8	1	HYtoHS	7	HYtoHS D7	S	HS	67215	Gcn2-IR	Gcn2	18
Act X 8 P2 R1	Act	8	1	HYtoHS	7	HYtoHS D7	S	HS	67215	Gcn2-IR	Gcn2	17
Act X 8 P2 R1	Act	8	1	HYtoHS	7	HYtoHS D7	S	HS	67215	Gcn2-IR	Gcn2	33
Act X 9 P2 R1	Act	9	1	HYtoHS	7	HYtoHS D7	S	HS	60003	Lk6-IR	Lk6	6
Act X 9 P2 R1	Act	9	1	HYtoHS	7	HYtoHS D7	S	HS	60003	Lk6-IR	Lk6	39
Act X 9 P2 R1	Act	9	1	HYtoHS	7	HYtoHS D7	S	HS	60003	Lk6-IR	Lk6	15
Act X 9 P2 R1	Act	9	1	HYtoHS	7	HYtoHS D7	S	HS	60003	Lk6-IR	Lk6	9
Act X 9 P2 R1	Act	9	1	HYtoHS	7	HYtoHS D7	S	HS	60003	Lk6-IR	Lk6	5
Act X 9 P2 R1	Act	9	1	HYtoHS	7	HYtoHS D7	S	HS	60003	Lk6-IR	Lk6	21
Act X 10 P2 R1	Act	10	1	HYtoHS	7	HYtoHS D7	S	HS	42499	PEK-IR	PEK	10
Act X 10 P2 R1	Act	10	1	HYtoHS	7	HYtoHS D7	S	HS	42499	PEK-IR	PEK	13
Act X 10 P2 R1	Act	10	1	HYtoHS	7	HYtoHS D7	S	HS	42499	PEK-IR	PEK	0
Act X 10 P2 R1	Act	10	1	HYtoHS	7	HYtoHS D7	S	HS	42499	PEK-IR	PEK	3
Act X 10 P2 R1	Act	10	1	HYtoHS	7	HYtoHS D7	S	HS	42499	PEK-IR	PEK	3
Act X 10 P2 R1	Act	10	1	HYtoHS	7	HYtoHS D7	S	HS	42499	PEK-IR	PEK	11
Act X 14 P2 R1	Act	14	1	HYtoHS	7	HYtoHS D7	S	HS	Control	Control	Control	0
Act X 14 P2 R1	Act	14	1	HYtoHS	7	HYtoHS D7	S	HS	Control	Control	Control	1
Act X 14 P2 R1	Act	14	1	HYtoHS	7	HYtoHS D7	S	HS	Control	Control	Control	4
Act X 14 P2 R1	Act	14	1	HYtoHS	7	HYtoHS D7	S	HS	Control	Control	Control	2
Act X 14 P2 R1	Act	14	1	HYtoHS	7	HYtoHS D7	S	HS	Control	Control	Control	11
Act X 14 P2 R1	Act	14	1	HYtoHS	7	HYtoHS D7	S	HS	Control	Control	Control	20
Act X 1 P2 R2	Act	1	2	HYtoHS	7	HYtoHS D7	S	HS	Control	Control	Control	22
Act X 1 P2 R2	Act	1	2	HYtoHS	7	HYtoHS D7	S	HS	Control	Control	Control	4
Act X 1 P2 R2	Act	1	2	HYtoHS	7	HYtoHS D7	S	HS	Control	Control	Control	15
Act X 1 P2 R2	Act	1	2	HYtoHS	7	HYtoHS D7	S	HS	Control	Control	Control	11
Act X 1 P2 R2	Act	1	2	HYtoHS	7	HYtoHS D7	S	HS	Control	Control	Control	10
Act X 1 P2 R2	Act	1	2	HYtoHS	7	HYtoHS D7	S	HS	Control	Control	Control	5
Act X 1 P2 R2	Act	1	2	HYtoHS	7	HYtoHS D7	S	HS	Control	Control	Control	9
Act X 1 P2 R2	Act	1	2	HYtoHS	7	HYtoHS D7	S	HS	Control	Control	Control	16
Act X 1 P2 R2	Act	1	2	HYtoHS	7	HYtoHS D7	S	HS	Control	Control	Control	10
Act X 11 P2 R2	Act	11	2	HYtoHS	7	HYtoHS D7	S	HS	67215	Gcn2-IR	Gcn2	37
Act X 11 P2 R2	Act	11	2	HYtoHS	7	HYtoHS D7	S	HS	67215	Gcn2-IR	Gcn2	28
Act X 11 P2 R2	Act	11	2	HYtoHS	7	HYtoHS D7	S	HS	67215	Gcn2-IR	Gcn2	28
Act X 11 P2 R2	Act	11	2	HYtoHS	7	HYtoHS D7	S	HS	67215	Gcn2-IR	Gcn2	40
Act X 11 P2 R2	Act	11	2	HYtoHS	7	HYtoHS D7	S	HS	67215	Gcn2-IR	Gcn2	30
Act X 11 P2 R2	Act	11	2	HYtoHS	7	HYtoHS D7	S	HS	67215	Gcn2-IR	Gcn2	32
Act X 11 P2 R2	Act	11	2	HYtoHS	7	HYtoHS D7	S	HS	67215	Gcn2-IR	Gcn2	45
Act X 12 P2 R2	Act	12	2	HYtoHS	7	HYtoHS D7	S	HS	60003	Lk6-IR	Lk6	15
Act X 12 P2 R2	Act	12	2	HYtoHS	7	HYtoHS D7	S	HS	60003	Lk6-IR	Lk6	28
Act X 12 P2 R2	Act	12	2	HYtoHS	7	HYtoHS D7	S	HS	60003	Lk6-IR	Lk6	32
Act X 12 P2 R2	Act	12	2	HYtoHS	7	HYtoHS D7	S	HS	60003	Lk6-IR	Lk6	27
Act X 12 P2 R2	Act	12	2	HYtoHS	7	HYtoHS D7	S	HS	60003	Lk6-IR	Lk6	22
Act X 12 P2 R2	Act	12	2	HYtoHS	7	HYtoHS D7	S	HS	60003	Lk6-IR	Lk6	21
Act X 12 P2 R2	Act	12	2	HYtoHS	7	HYtoHS D7	S	HS	60003	Lk6-IR	Lk6	15
Act X 12 P2 R2	Act	12	2	HYtoHS	7	HYtoHS D7	S	HS	60003	Lk6-IR	Lk6	27
Act X 13 P2 R2	Act	13	2	HYtoHS	7	HYtoHS D7	S	HS	42499	PEK-IR	PEK	15
Act X 13 P2 R2	Act	13	2	HYtoHS	7	HYtoHS D7	S	HS	42499	PEK-IR	PEK	7
Act X 13 P2 R2	Act	13	2	HYtoHS	7	HYtoHS D7	S	HS	42499	PEK-IR	PEK	7
Act X 13 P2 R2	Act	13	2	HYtoHS	7	HYtoHS D7	S	HS	42499	PEK-IR	PEK	15
Act X 13 P2 R2	Act	13	2	HYtoHS	7	HYtoHS D7	S	HS	42499	PEK-IR	PEK	2
Act X 13 P2 R2	Act	13	2	HYtoHS	7	HYtoHS D7	S	HS	42499	PEK-IR	PEK	10
Act X 13 P2 R2	Act	13	2	HYtoHS	7	HYtoHS D7	S	HS	42499	PEK-IR	PEK	10
Act X 13 P2 R2	Act	13	2	HYtoHS	7	HYtoHS D7	S	HS	42499	PEK-IR	PEK	3
Act X 14 P2 R2	Act	14	2	HYtoHS	7	HYtoHS D7	S	HS	32371	Ampk-IR	AmpK	21
Act X 14 P2 R2	Act	14	2	HYtoHS	7	HYtoHS D7	S	HS	32371	Ampk-IR	AmpK	14
Act X 14 P2 R2	Act	14	2	HYtoHS	7	HYtoHS D7	S	HS	32371	Ampk-IR	AmpK	5
Act X 14 P2 R2	Act	14	2	HYtoHS	7	HYtoHS D7	S	HS	32371	Ampk-IR	AmpK	11
Act X 14 P2 R2	Act	14	2	HYtoHS	7	HYtoHS D7	S	HS	32371	Ampk-IR	AmpK	25
Act X 14 P2 R2	Act	14	2	HYtoHS	7	HYtoHS D7	S	HS	32371	Ampk-IR	AmpK	5
Act X 14 P2 R2	Act	14	2	HYtoHS	7	HYtoHS D7	S	HS	32371	Ampk-IR	AmpK	28
Act X 14 P2 R2	Act	14	2	HYtoHS	7	HYtoHS D7	S	HS	32371	Ampk-IR	AmpK	4
Act X 1 P2 R3	Act	1	3	HYtoHS	7	HYtoHS D7	S	HS	32371	Ampk-IR	AmpK	4
Act X 1 P2 R3	Act	1	3	HYtoHS	7	HYtoHS D7	S	HS	32371	Ampk-IR	AmpK	1
Act X 1 P2 R3	Act	1	3	HYtoHS	7	HYtoHS D7	S	HS	32371	Ampk-IR	AmpK	5
Act X 1 P2 R3	Act	1	3	HYtoHS	7	HYtoHS D7	S	HS	32371	Ampk-IR	AmpK	9
Act X 1 P2 R3	Act	1	3	HYtoHS	7	HYtoHS D7	S	HS	32371	Ampk-IR	AmpK	10
Act X 1 P2 R3	Act	1	3	HYtoHS	7	HYtoHS D7	S	HS	32371	Ampk-IR	AmpK	8
Act X 1 P2 R3	Act	1	3	HYtoHS	7	HYtoHS D7	S	HS	32371	Ampk-IR	AmpK	10
Act X 1 P2 R3	Act	1	3	HYtoHS	7	HYtoHS D7	S	HS	32371	Ampk-IR	AmpK	7
Act X 4 P2 R3	Act	4	3	HYtoHS	7	HYtoHS D7	S	HS	Control	Control	Control	6
Act X 4 P2 R3	Act	4	3	HYtoHS	7	HYtoHS D7	S	HS	Control	Control	Control	10
Act X 4 P2 R3	Act	4	3	HYtoHS	7	HYtoHS D7	S	HS	Control	Control	Control	4
Act X 4 P2 R3	Act	4	3	HYtoHS	7	HYtoHS D7	S	HS	Control	Control	Control	18
Act X 4 P2 R3	Act	4	3	HYtoHS	7	HYtoHS D7	S	HS	Control	Control	Control	5
Act X 4 P2 R3	Act	4	3	HYtoHS	7	HYtoHS D7	S	HS	Control	Control	Control	17
Act X 4 P2 R3	Act	4	3	HYtoHS	7	HYtoHS D7	S	HS	Control	Control	Control	11
Act X 4 P2 R3	Act	4	3	HYtoHS	7	HYtoHS D7	S	HS	Control	Control	Control	6
Act X 8 P2 R3	Act	8	3	HYtoHS	7	HYtoHS D7	S	HS	67215	Gcn2-IR	Gcn2	30
Act X 8 P2 R3	Act	8	3	HYtoHS	7	HYtoHS D7	S	HS	67215	Gcn2-IR	Gcn2	42
Act X 8 P2 R3	Act	8	3	HYtoHS	7	HYtoHS D7	S	HS	67215	Gcn2-IR	Gcn2	23
Act X 8 P2 R3	Act	8	3	HYtoHS	7	HYtoHS D7	S	HS	67215	Gcn2-IR	Gcn2	14
Act X 8 P2 R3	Act	8	3	HYtoHS	7	HYtoHS D7	S	HS	67215	Gcn2-IR	Gcn2	8
Act X 8 P2 R3	Act	8	3	HYtoHS	7	HYtoHS D7	S	HS	67215	Gcn2-IR	Gcn2	18
Act X 8 P2 R3	Act	8	3	HYtoHS	7	HYtoHS D7	S	HS	67215	Gcn2-IR	Gcn2	35
Act X 8 P2 R3	Act	8	3	HYtoHS	7	HYtoHS D7	S	HS	67215	Gcn2-IR	Gcn2	22
Act X 14 P2 R3	Act	14	3	HYtoHS	7	HYtoHS D7	S	HS	60003	Lk6-IR	Lk6	21
Act X 14 P2 R3	Act	14	3	HYtoHS	7	HYtoHS D7	S	HS	60003	Lk6-IR	Lk6	49
Act X 14 P2 R3	Act	14	3	HYtoHS	7	HYtoHS D7	S	HS	60003	Lk6-IR	Lk6	41
Act X 14 P2 R3	Act	14	3	HYtoHS	7	HYtoHS D7	S	HS	60003	Lk6-IR	Lk6	41
Act X 14 P2 R3	Act	14	3	HYtoHS	7	HYtoHS D7	S	HS	60003	Lk6-IR	Lk6	32
Act X 14 P2 R3	Act	14	3	HYtoHS	7	HYtoHS D7	S	HS	60003	Lk6-IR	Lk6	33
Act X 14 P2 R3	Act	14	3	HYtoHS	7	HYtoHS D7	S	HS	60003	Lk6-IR	Lk6	23
Act X 14 P2 R3	Act	14	3	HYtoHS	7	HYtoHS D7	S	HS	60003	Lk6-IR	Lk6	30
Act X 14 P2 R3	Act	14	3	HYtoHS	7	HYtoHS D7	S	HS	60003	Lk6-IR	Lk6	60
Act X 15 P2 R3	Act	15	3	HYtoHS	7	HYtoHS D7	S	HS	42499	PEK-IR	PEK	20
Act X 15 P2 R3	Act	15	3	HYtoHS	7	HYtoHS D7	S	HS	42499	PEK-IR	PEK	35
Act X 15 P2 R3	Act	15	3	HYtoHS	7	HYtoHS D7	S	HS	42499	PEK-IR	PEK	23
Act X 15 P2 R3	Act	15	3	HYtoHS	7	HYtoHS D7	S	HS	42499	PEK-IR	PEK	23
