# Supplementary material for: Multiscale analysis reveals that diet-dependent midgut plasticity emerges from alterations in both stem cell niche coupling and enterocyte size
Source: eLife. 2021 Sep 23;10:e64125. doi: 10.7554/eLife.64125 (PMC8528489; doi:10.7554/eLife.64125)
Supplement: Figure 5—figure supplement 2—source data 3. [file elife-64125-fig5-figsupp2-data3.csv]

Female.Line	Repeat	Day	Diet	C.G	Male.Line	Total.PH3
Myo	1	7	HYtoHS D7	HS	Control	10
Myo	1	7	HYtoHS D7	HS	Control	11
Myo	1	7	HYtoHS D7	HS	Control	3
Myo	1	7	HYtoHS D7	HS	Control	10
Myo	1	7	HYtoHS D7	HS	Control	14
Myo	1	7	HYtoHS D7	HS	Control	18
Myo	1	7	HYtoHS D7	HS	Control	20
Myo	1	7	HYtoHS D7	HS	Control	13
Myo	1	7	HYtoHS D7	HS	Control	15
Myo	1	7	HYtoHS D7	HS	Gcn2-IR	34
Myo	1	7	HYtoHS D7	HS	Gcn2-IR	35
Myo	1	7	HYtoHS D7	HS	Gcn2-IR	32
Myo	1	7	HYtoHS D7	HS	Gcn2-IR	12
Myo	1	7	HYtoHS D7	HS	Gcn2-IR	29
Myo	1	7	HYtoHS D7	HS	Gcn2-IR	14
Myo	1	7	HYtoHS D7	HS	Gcn2-IR	46
Myo	1	7	HYtoHS D7	HS	Gcn2-IR	16
Esg	1	7	HYtoHS D7	HS	Control	7
Esg	1	7	HYtoHS D7	HS	Control	3
Esg	1	7	HYtoHS D7	HS	Control	2
Esg	1	7	HYtoHS D7	HS	Control	0
Esg	1	7	HYtoHS D7	HS	Control	3
Esg	1	7	HYtoHS D7	HS	Control	6
Esg	1	7	HYtoHS D7	HS	Control	7
Esg	1	7	HYtoHS D7	HS	Control	3
Esg	1	7	HYtoHS D7	HS	Gcn2-IR	33
Esg	1	7	HYtoHS D7	HS	Gcn2-IR	39
Esg	1	7	HYtoHS D7	HS	Gcn2-IR	7
Esg	1	7	HYtoHS D7	HS	Gcn2-IR	15
Esg	1	7	HYtoHS D7	HS	Gcn2-IR	12
Esg	1	7	HYtoHS D7	HS	Gcn2-IR	34
Esg	1	7	HYtoHS D7	HS	Gcn2-IR	9
Esg	1	7	HYtoHS D7	HS	Gcn2-IR	7
Myo	2	7	HYtoHS D7	HS	Control	5
Myo	2	7	HYtoHS D7	HS	Control	27
Myo	2	7	HYtoHS D7	HS	Control	8
Myo	2	7	HYtoHS D7	HS	Control	13
Myo	2	7	HYtoHS D7	HS	Control	16
Myo	2	7	HYtoHS D7	HS	Control	1
Myo	2	7	HYtoHS D7	HS	Control	34
Myo	2	7	HYtoHS D7	HS	Control	42
Myo	2	7	HYtoHS D7	HS	Control	30
Myo	2	7	HYtoHS D7	HS	Gcn2-IR	61
Myo	2	7	HYtoHS D7	HS	Gcn2-IR	27
Myo	2	7	HYtoHS D7	HS	Gcn2-IR	77
Myo	2	7	HYtoHS D7	HS	Gcn2-IR	43
Myo	2	7	HYtoHS D7	HS	Gcn2-IR	40
Myo	2	7	HYtoHS D7	HS	Gcn2-IR	28
Myo	2	7	HYtoHS D7	HS	Gcn2-IR	38
Myo	2	7	HYtoHS D7	HS	Gcn2-IR	39
Myo	3	7	HYtoHS D7	HS	Gcn2-IR	47
Myo	3	7	HYtoHS D7	HS	Gcn2-IR	14
Myo	3	7	HYtoHS D7	HS	Gcn2-IR	21
Myo	3	7	HYtoHS D7	HS	Gcn2-IR	19
Myo	3	7	HYtoHS D7	HS	Gcn2-IR	23
Myo	3	7	HYtoHS D7	HS	Gcn2-IR	58
Myo	3	7	HYtoHS D7	HS	Gcn2-IR	24
Myo	3	7	HYtoHS D7	HS	Gcn2-IR	18
Myo	3	7	HYtoHS D7	HS	Control	16
Myo	3	7	HYtoHS D7	HS	Control	17
Myo	3	7	HYtoHS D7	HS	Control	8
Myo	3	7	HYtoHS D7	HS	Control	7
Myo	3	7	HYtoHS D7	HS	Control	17
Myo	3	7	HYtoHS D7	HS	Control	11
Myo	3	7	HYtoHS D7	HS	Control	11
Esg	2	7	HYtoHS D7	HS	Control	24
Esg	2	7	HYtoHS D7	HS	Control	13
Esg	2	7	HYtoHS D7	HS	Control	7
Esg	2	7	HYtoHS D7	HS	Control	2
Esg	2	7	HYtoHS D7	HS	Control	5
Esg	2	7	HYtoHS D7	HS	Control	6
Esg	2	7	HYtoHS D7	HS	Control	8
Esg	2	7	HYtoHS D7	HS	Control	16
Esg	2	7	HYtoHS D7	HS	Control	12
Esg	2	7	HYtoHS D7	HS	Gcn2-IR	36
Esg	2	7	HYtoHS D7	HS	Gcn2-IR	12
Esg	2	7	HYtoHS D7	HS	Gcn2-IR	18
Esg	2	7	HYtoHS D7	HS	Gcn2-IR	36
Esg	2	7	HYtoHS D7	HS	Gcn2-IR	14
Esg	2	7	HYtoHS D7	HS	Gcn2-IR	17
Esg	2	7	HYtoHS D7	HS	Gcn2-IR	6
Esg	2	7	HYtoHS D7	HS	Gcn2-IR	14
Esg	2	7	HYtoHS D7	HS	Gcn2-IR	24
Esg	3	7	HYtoHS D7	HS	Gcn2-IR	10
Esg	3	7	HYtoHS D7	HS	Gcn2-IR	5
Esg	3	7	HYtoHS D7	HS	Gcn2-IR	4
Esg	3	7	HYtoHS D7	HS	Gcn2-IR	2
Esg	3	7	HYtoHS D7	HS	Gcn2-IR	2
Esg	3	7	HYtoHS D7	HS	Gcn2-IR	3
Esg	3	7	HYtoHS D7	HS	Gcn2-IR	0
Esg	3	7	HYtoHS D7	HS	Gcn2-IR	5
Esg	3	7	HYtoHS D7	HS	Gcn2-IR	10
Esg	3	7	HYtoHS D7	HS	Control	11
Esg	3	7	HYtoHS D7	HS	Control	13
Esg	3	7	HYtoHS D7	HS	Control	10
Esg	3	7	HYtoHS D7	HS	Control	21
Esg	3	7	HYtoHS D7	HS	Control	10
Esg	3	7	HYtoHS D7	HS	Control	2
Esg	3	7	HYtoHS D7	HS	Control	12
Esg	3	7	HYtoHS D7	HS	Control	16
