# Supplementary material for: Multiscale analysis reveals that diet-dependent midgut plasticity emerges from alterations in both stem cell niche coupling and enterocyte size
Source: eLife. 2021 Sep 23;10:e64125. doi: 10.7554/eLife.64125 (PMC8528489; doi:10.7554/eLife.64125)
Supplement: Figure 5—source data 1. [file elife-64125-fig5-data1.csv]

	feature	name	alias	Day0 Rep1	Day0 Rep2	Day0 Rep3	HS Day1 Rep1	HS Day1 Rep2	HS Day1 Rep3	HS Day2 Rep1	HS Day2 Rep2	HS Day2 Rep3	HS Day3 Rep1	HS Day3 Rep2	HS Day3 Rep3	HS Day5 Rep1	HS Day5 Rep2	HS Day5 Rep3	HY Day1 Rep1	HY Day1 Rep2	HY Day1 Rep3	HY Day2 Rep1	HY Day2 Rep2	HY Day2 Rep3	HY Day3 Rep1	HY Day3 Rep2	HY Day3 Rep3	HY Day5 Rep1	HY Day5 Rep2	HY Day5 Rep3
	N_unmapped	N_unmapped	N_unmapped	276864	149585	284038	173663	77685	500769	202354	143029	124702	149898	100539	310794	161474	164801	256921	99672	86680	114687	128240	103232	159102	123373	107118	136595	238845	115594	90967
	N_multimapping	N_multimapping	N_multimapping	809490	694342	760601	1662176	537747	660954	348067	860168	612980	549410	575169	605645	357493	358438	406632	856327	609865	737421	303372	786769	784544	839065	686713	669783	387420	453594	434571
	N_noFeature	N_noFeature	N_noFeature	175314	147490	181241	189608	75668	141976	106981	145372	136171	101888	106566	147423	147914	132007	133299	78121	65891	140786	73916	64957	119279	59275	66891	81123	70953	58488	79325
	N_ambiguous	N_ambiguous	N_ambiguous	95987	86972	105965	116692	45646	77601	97631	81967	70435	57219	53693	72893	109691	95874	87820	53528	49335	83156	63315	54532	69903	46990	48938	57053	72122	66464	62081
FBgn0000003_7SLRNA:CR32864	FBgn0000003	Signal recognition particle 7SL RNA CR32864	7SLRNA:CR32864	0	0	0	0	0	0	0	0	0	0	0	0	0	0	0	0	0	1	0	0	0	0	0	0	0	0	0
FBgn0000008_a	FBgn0000008	arc	a	6	2	4	0	1	3	4	5	3	3	2	1	7	1	1	2	0	0	2	1	4	1	1	0	4	0	0
FBgn0000014_abd-A	FBgn0000014	abdominal A	abd-A	30	29	62	34	6	30	20	12	16	7	10	27	11	13	23	9	3	38	6	3	14	3	5	4	0	5	7
FBgn0000015_Abd-B	FBgn0000015	Abdominal B	Abd-B	11	8	15	9	2	6	4	4	11	2	3	10	6	2	3	4	4	12	4	5	6	3	1	1	0	0	2
FBgn0000017_Abl	FBgn0000017	Abl tyrosine kinase	Abl	95	70	80	77	40	53	33	53	53	57	27	75	63	36	55	25	19	58	26	28	58	17	24	32	18	29	40
FBgn0000018_abo	FBgn0000018	abnormal oocyte	abo	21	14	30	27	5	20	15	19	20	15	10	17	29	19	16	8	14	8	15	6	11	4	5	10	7	9	16
FBgn0000022_ac	FBgn0000022	achaete	ac	0	0	0	0	0	0	0	1	0	0	0	0	0	0	0	0	0	0	0	0	0	0	0	0	0	0	0
FBgn0000024_Ace	FBgn0000024	Acetylcholine esterase	Ace	319	330	406	390	154	230	525	268	262	138	142	224	289	259	327	129	138	340	242	135	228	112	142	151	336	112	162
FBgn0000028_acj6	FBgn0000028	abnormal chemosensory jump 6	acj6	0	0	2	0	0	1	0	0	1	0	1	0	0	0	0	0	0	0	0	0	0	0	0	0	0	0	0
FBgn0000032_Acph-1	FBgn0000032	Acid phosphatase 1	Acph-1	71	54	94	71	27	51	54	69	52	35	33	60	65	48	36	30	25	49	74	31	46	19	28	38	35	11	28
FBgn0000036_nAChRalpha1	FBgn0000036	nicotinic Acetylcholine Receptor alpha1	nAChRalpha1	0	0	0	1	1	1	0	0	1	1	0	0	0	0	0	0	0	0	0	1	0	0	0	0	0	0	0
FBgn0000037_mAChR-A	FBgn0000037	muscarinic Acetylcholine Receptor, A-type	mAChR-A	5	1	3	1	0	0	1	1	1	1	0	1	2	0	1	0	0	2	0	0	0	0	0	1	0	0	0
FBgn0000038_nAChRbeta1	FBgn0000038	nicotinic Acetylcholine Receptor beta1	nAChRbeta1	0	0	0	0	0	0	0	0	0	0	0	0	3	0	0	0	0	0	0	0	0	0	0	1	0	0	0
FBgn0000039_nAChRalpha2	FBgn0000039	nicotinic Acetylcholine Receptor alpha2	nAChRalpha2	0	0	0	0	0	0	0	0	0	0	0	0	0	0	0	0	0	0	0	0	0	0	0	0	0	0	0
FBgn0000042_Act5C	FBgn0000042	Actin 5C	Act5C	18463	16126	19941	26416	9753	17626	15758	15873	8755	9971	8017	13605	18948	16056	13244	9299	7861	13578	18110	6309	9686	7452	7687	10915	12399	10831	12949
FBgn0000043_Act42A	FBgn0000043	Actin 42A	Act42A	558	353	577	1331	425	637	816	868	298	433	268	555	519	436	377	194	75	182	253	58	105	91	122	194	120	181	182
FBgn0000044_Act57B	FBgn0000044	Actin 57B	Act57B	1777	7483	9439	3015	1287	4435	1145	1148	2458	474	604	876	1007	1208	1303	1577	1173	3943	964	700	1285	547	513	360	453	251	1321
FBgn0000045_Act79B	FBgn0000045	Actin 79B	Act79B	11	13	19	10	9	6	1	8	5	9	16	10	21	18	18	2	1	4	2	3	10	6	1	4	1	6	7
FBgn0000046_Act87E	FBgn0000046	Actin 87E	Act87E	1715	1528	1763	563	269	713	341	232	345	132	162	232	318	355	366	213	233	570	211	89	272	113	98	176	135	108	455
FBgn0000047_Act88F	FBgn0000047	Actin 88F	Act88F	0	3	0	0	0	3	2	3	0	1	3	1	2	3	0	0	5	0	0	0	3	2	1	3	0	0	1
FBgn0000052_ade2	FBgn0000052	adenosine 2	ade2	23	25	35	62	11	29	32	36	37	26	27	44	45	34	30	26	9	28	28	28	37	39	30	27	30	32	49
FBgn0000053_ade3	FBgn0000053	adenosine 3	ade3	110	130	100	86	38	51	48	44	50	15	29	51	55	51	62	54	26	56	41	34	42	21	28	37	34	41	43
FBgn0000054_Adf1	FBgn0000054	Adh transcription factor 1	Adf1	90	69	81	83	29	50	40	85	41	38	55	51	95	69	49	35	36	56	31	34	52	22	36	32	17	23	28
FBgn0000055_Adh	FBgn0000055	Alcohol dehydrogenase	Adh	0	0	0	0	0	0	0	0	1	0	0	0	0	0	0	0	0	0	0	0	0	0	0	0	1	0	0
FBgn0000056_Adhr	FBgn0000056	Adh-related	Adhr	0	0	0	0	0	0	0	0	0	0	0	0	0	0	0	0	0	0	0	0	0	0	0	0	0	0	0
FBgn0000057_adp	FBgn0000057	adipose	adp	23	18	22	31	13	31	35	28	16	13	19	27	37	26	30	28	17	33	48	11	34	21	30	38	45	34	31
FBgn0000061_al	FBgn0000061	aristaless	al	0	0	1	0	0	0	0	0	0	0	0	0	1	0	0	0	0	0	0	0	0	0	0	0	2	0	0
FBgn0000063_Mps1	FBgn0000063	Monopolar spindle 1	Mps1	1	1	0	0	0	0	0	0	5	2	0	0	1	3	0	0	0	1	2	0	1	0	0	0	1	2	0
FBgn0000064_Ald	FBgn0000064	Aldolase	Ald	15745	14667	15645	5687	2620	4689	2770	4141	3405	2619	2486	3373	5001	4016	3924	3003	2783	5785	2858	2578	4342	2153	2150	3028	2184	2506	3634
FBgn0000071_Ama	FBgn0000071	Amalgam	Ama	20	4	2	11	2	3	5	5	1	2	2	4	1	0	1	3	0	2	0	0	2	0	1	1	0	1	0
FBgn0000075_amd	FBgn0000075	alpha methyl dopa-resistant	amd	13	19	17	18	2	13	5	12	12	3	3	4	7	13	8	2	3	3	3	4	8	2	3	6	3	0	4
FBgn0000077_amx	FBgn0000077	almondex	amx	8	21	30	41	13	22	31	25	19	16	17	24	34	13	22	16	10	20	28	20	18	13	22	13	24	15	11
FBgn0000078_Amy-d	FBgn0000078	Amylase distal	Amy-d	941	1184	1368	21459	7307	7674	20641	12614	8758	5436	5328	6861	8112	5992	5955	10670	7204	7155	15077	9859	7282	10636	9430	12946	29173	19795	11870
FBgn0000079_Amy-p	FBgn0000079	Amylase proximal	Amy-p	4026	4663	6361	47074	18559	17409	60804	25168	16453	11985	10976	12407	23872	17970	16930	23166	18778	19420	40735	20505	15058	20161	18691	26237	82286	61649	29772
FBgn0000083_AnxB9	FBgn0000083	Annexin B9	AnxB9	717	466	540	1710	471	612	1215	706	378	417	328	573	508	494	449	315	245	307	346	226	242	299	274	376	421	375	197
FBgn0000084_AnxB10	FBgn0000084	Annexin B10	AnxB10	335	235	265	630	230	219	449	296	97	147	122	183	213	178	139	142	101	100	156	58	66	77	81	113	166	141	81
FBgn0000092_CG2650	FBgn0000092	0	CG2650	36	52	51	6	0	2	2	2	2	3	0	1	1	1	5	2	2	1	3	2	1	0	1	2	0	1	1
FBgn0000094_Anp	FBgn0000094	Andropin	Anp	0	0	0	1	0	0	0	0	0	0	0	0	0	0	0	0	0	0	0	0	0	0	0	0	0	0	0
FBgn0000097_aop	FBgn0000097	anterior open	aop	1159	874	813	457	179	446	185	374	380	305	254	377	360	324	318	201	124	381	99	112	248	105	135	128	67	86	228
FBgn0000100_RpLP0	FBgn0000100	Ribosomal protein LP0	RpLP0	10789	8079	10740	13150	4748	7406	8925	10753	7312	6401	6721	8551	10205	9492	10325	6626	6252	8427	6400	8017	8071	6923	6984	8697	8550	8824	5724
FBgn0000108_Appl	FBgn0000108	beta amyloid protein precursor-like	Appl	30	22	27	37	14	26	37	27	36	25	16	26	68	50	44	13	15	29	50	16	19	30	27	36	61	20	29
FBgn0000109_Aprt	FBgn0000109	Adenine phosphoribosyltransferase	Aprt	491	315	371	319	104	216	186	154	113	81	99	157	209	151	157	125	136	217	241	99	137	80	93	170	165	122	181
FBgn0000114_aret	FBgn0000114	arrest	aret	44	15	18	17	2	14	11	3	5	8	1	11	7	5	4	4	7	15	11	3	4	6	5	3	23	15	1
FBgn0000115_Arl1	FBgn0000115	ADP ribosylation factor-like 1	Arl1	140	122	180	240	99	157	209	152	92	103	81	115	254	198	188	116	99	129	229	134	137	142	120	138	223	153	131
FBgn0000116_Argk	FBgn0000116	Arginine kinase	Argk	1052	1140	2007	7926	2557	4633	4737	2735	2419	1560	1678	2073	3626	2860	2453	4225	4128	4864	5944	2829	2669	2612	3570	2600	6321	3027	2959
FBgn0000117_arm	FBgn0000117	armadillo	arm	290	176	270	292	117	198	331	202	158	152	122	195	411	310	276	122	119	136	366	117	169	132	108	177	205	264	161
FBgn0000119_arr	FBgn0000119	arrow	arr	28	23	44	43	13	35	20	36	19	21	26	33	24	19	18	16	19	32	20	11	26	13	16	13	12	5	10
FBgn0000120_Arr1	FBgn0000120	Arrestin 1	Arr1	5	2	3	11	3	14	2	7	4	0	3	1	3	1	2	14	14	31	11	7	13	1	2	6	4	4	4
FBgn0000121_Arr2	FBgn0000121	Arrestin 2	Arr2	0	0	3	2	0	0	5	0	0	0	3	0	1	0	1	0	0	0	1	1	0	0	0	0	1	1	2
FBgn0000137_ase	FBgn0000137	asense	ase	0	0	0	1	0	0	0	1	0	0	0	0	0	0	0	0	0	0	0	0	0	0	0	0	0	0	0
FBgn0000139_ash2	FBgn0000139	absent, small, or homeotic discs 2	ash2	94	64	151	195	83	144	192	236	177	106	109	175	234	169	188	95	65	119	218	68	105	61	80	123	76	73	79
FBgn0000140_asp	FBgn0000140	abnormal spindle	asp	1	1	0	1	1	2	0	1	1	1	1	0	0	0	0	0	0	1	0	0	1	0	0	0	0	0	1
FBgn0000146_aub	FBgn0000146	aubergine	aub	7	6	1	0	0	0	0	1	0	0	0	2	0	1	1	0	0	0	0	0	0	0	0	0	0	1	0
FBgn0000147_aurA	FBgn0000147	aurora A	aurA	1	0	3	7	3	3	1	0	0	2	1	0	2	1	4	1	1	1	2	1	0	0	4	0	3	4	0
FBgn0000150_awd	FBgn0000150	abnormal wing discs	awd	10450	7457	9499	7609	2552	4318	9335	4116	2874	2485	2376	3558	6286	5274	5092	3512	3930	4852	5598	3046	3445	3318	3247	4245	10874	6319	4377
FBgn0000152_Axs	FBgn0000152	Abnormal X segregation	Axs	10	20	18	20	3	17	18	15	15	10	17	14	21	12	23	10	9	11	2	10	7	6	3	7	8	8	7
FBgn0000153_b	FBgn0000153	black	b	21	5	12	0	1	4	2	1	2	0	1	0	1	2	0	3	2	1	1	0	1	0	1	0	0	1	0
FBgn0000157_Dll	FBgn0000157	Distal-less	Dll	0	0	0	0	1	0	0	1	0	0	0	0	0	0	1	0	0	0	0	0	0	0	0	0	0	0	0
FBgn0000158_bam	FBgn0000158	bag of marbles	bam	0	1	1	1	0	0	0	0	0	0	0	0	0	0	0	0	0	0	0	0	0	0	0	0	0	0	0
FBgn0000163_baz	FBgn0000163	bazooka	baz	374	235	363	354	142	270	155	312	216	209	181	267	279	251	251	155	115	225	156	123	201	116	138	180	112	125	183
FBgn0000166_bcd	FBgn0000166	bicoid	bcd	0	0	0	0	0	0	0	0	0	0	0	0	0	0	0	0	0	0	0	0	0	0	0	0	3	0	0
FBgn0000173_ben	FBgn0000173	bendless	ben	2093	2149	2290	3045	1197	1827	2490	1780	1493	1225	1059	1564	2347	2024	1715	1355	1251	1869	2598	1128	1607	1105	1098	1358	1497	1210	1298
FBgn0000179_bi	FBgn0000179	bifid	bi	0	2	2	0	1	1	1	1	0	0	0	0	1	1	0	0	1	1	0	0	1	0	0	0	0	0	0
FBgn0000180_bib	FBgn0000180	big brain	bib	3	2	0	2	1	0	2	1	1	1	2	7	5	0	0	0	0	2	0	1	5	0	2	4	4	0	3
FBgn0000181_bic	FBgn0000181	bicaudal	bic	3155	2128	2553	2709	922	1293	2911	1929	1262	1029	1084	1428	2507	2030	1862	999	890	1237	2186	1292	1264	1211	1176	1281	2608	1976	1050
FBgn0000182_BicC	FBgn0000182	Bicaudal C	BicC	0	0	0	0	0	0	0	0	0	0	0	0	0	0	0	0	0	0	0	0	0	0	0	0	0	0	0
FBgn0000183_BicD	FBgn0000183	Bicaudal D	BicD	497	438	398	464	205	289	163	296	248	244	199	262	286	225	204	228	201	319	186	175	303	192	181	256	216	159	229
FBgn0000206_boss	FBgn0000206	bride of sevenless	boss	0	1	0	0	0	0	0	0	1	0	0	0	0	1	0	0	0	0	0	0	0	0	0	0	0	0	0
FBgn0000212_brm	FBgn0000212	brahma	brm	220	160	198	142	52	143	32	96	106	71	66	152	165	122	131	50	36	99	70	43	104	34	50	65	23	26	66
FBgn0000216_Brd	FBgn0000216	Bearded	Brd	0	0	0	0	0	0	0	0	0	0	0	0	0	0	0	0	0	0	0	0	0	0	0	0	0	0	0
FBgn0000221_brn	FBgn0000221	brainiac	brn	28	36	53	49	25	44	74	40	20	29	27	29	77	70	65	33	30	29	74	32	35	20	26	36	71	54	35
FBgn0000227_Bsg25A	FBgn0000227	Blastoderm-specific gene 25A	Bsg25A	0	1	0	0	0	0	0	0	0	0	0	0	0	0	0	0	0	0	0	0	0	0	0	0	0	0	0
FBgn0000228_Bsg25D	FBgn0000228	Blastoderm-specific gene 25D	Bsg25D	80	62	63	80	39	75	29	82	65	64	55	79	57	59	71	27	26	78	28	27	54	25	28	37	8	23	31
FBgn0000229_bsk	FBgn0000229	basket	bsk	83	88	125	138	40	101	97	117	101	80	66	105	221	140	126	64	39	82	174	49	70	43	57	76	77	78	65
FBgn0000233_btd	FBgn0000233	buttonhead	btd	0	0	0	0	0	0	0	1	0	0	0	0	0	0	0	0	0	0	0	0	0	0	0	0	0	0	0
FBgn0000239_bur	FBgn0000239	burgundy	bur	102	62	85	73	23	29	38	63	44	36	33	45	43	52	53	36	15	31	26	27	43	16	26	27	32	25	43
FBgn0000241_bw	FBgn0000241	brown	bw	3	11	5	8	2	7	7	4	0	4	1	5	4	3	2	2	3	1	7	5	1	2	1	4	4	1	3
FBgn0000244_by	FBgn0000244	blistery	by	42	83	147	179	79	162	179	153	143	104	89	171	265	168	188	79	45	113	220	73	90	60	97	110	93	92	82
FBgn0000246_c(3)G	FBgn0000246	crossover suppressor on 3 of Gowen	c(3)G	3	4	2	1	1	4	4	6	6	3	2	1	1	2	3	0	0	4	0	3	2	3	0	0	1	0	1
FBgn0000247_ca	FBgn0000247	claret	ca	23	28	41	42	23	33	21	25	28	27	24	39	31	33	50	17	7	28	27	15	28	6	5	16	10	12	23
FBgn0000250_cact	FBgn0000250	cactus	cact	316	245	298	195	66	247	162	187	180	99	150	212	304	211	191	68	41	197	155	60	150	48	61	97	75	65	107
FBgn0000251_cad	FBgn0000251	caudal	cad	142	175	179	198	88	159	150	181	170	175	124	190	368	304	248	96	71	182	128	57	150	71	67	84	65	71	120
FBgn0000253_Cam	FBgn0000253	Calmodulin	Cam	8335	5181	8360	5282	2085	6378	1848	4553	4190	3723	3305	5199	3846	3036	3519	1979	1569	5606	1441	1502	3217	957	1397	1619	661	634	2064
FBgn0000256_capu	FBgn0000256	cappuccino	capu	84	55	77	236	98	165	192	203	147	129	119	203	248	212	174	100	105	200	146	104	132	68	109	133	91	100	157
FBgn0000257_car	FBgn0000257	carnation	car	62	57	75	79	30	58	47	57	53	39	43	66	65	52	64	42	35	39	68	38	57	24	41	46	28	28	19
FBgn0000259_CkIIbeta	FBgn0000259	Casein kinase II beta subunit	CkIIbeta	491	369	409	310	123	249	247	222	212	211	168	227	421	326	317	125	87	265	207	90	192	86	96	102	91	99	187
FBgn0000261_Cat	FBgn0000261	Catalase	Cat	1704	1690	2734	3770	1284	2642	1161	1800	1495	1032	924	1655	1916	1214	1330	2678	2100	2978	2761	1497	2219	1180	1454	2214	1536	1134	1934
FBgn0000273_Pka-C1	FBgn0000273	Protein kinase, cAMP-dependent, catalytic subunit 1	Pka-C1	549	419	627	412	210	478	234	352	380	311	253	424	472	397	397	175	151	488	157	94	287	100	104	166	118	65	286
FBgn0000274_Pka-C2	FBgn0000274	Protein kinase, cAMP-dependent, catalytic subunit 2	Pka-C2	0	0	0	0	0	0	0	0	0	0	0	0	0	0	0	0	0	0	0	0	0	0	0	0	0	0	0
FBgn0000276_CecA1	FBgn0000276	Cecropin A1	CecA1	2	4	14	67	16	13	79	75	21	58	37	59	86	26	15	39	1	6	34	9	6	8	31	9	7	6	11
FBgn0000277_CecA2	FBgn0000277	Cecropin A2	CecA2	2	5	8	41	7	4	36	38	7	24	17	17	26	10	8	21	1	2	13	2	13	3	8	6	5	3	3
FBgn0000278_CecB	FBgn0000278	Cecropin B	CecB	0	0	3	3	0	2	7	6	0	1	2	1	1	0	0	2	0	0	1	0	0	0	0	0	0	0	0
FBgn0000279_CecC	FBgn0000279	Cecropin C	CecC	2	0	4	21	4	3	31	32	7	17	12	12	17	5	7	7	0	1	8	0	0	0	8	3	1	0	1
FBgn0000280_Cec-Psi1	FBgn0000280	Cecropin pseudogene 1	Cec-Psi1	0	0	0	0	0	0	0	0	0	0	0	2	0	0	0	0	0	0	0	0	0	0	0	0	0	0	0
FBgn0000281_Cec2	FBgn0000281	Cecropin 2	Cec2	0	0	0	0	0	0	1	0	0	0	0	0	1	0	0	0	0	0	0	0	0	0	0	0	0	0	0
FBgn0000283_Cp190	FBgn0000283	Centrosomal protein 190kD	Cp190	177	153	164	117	49	163	90	120	144	116	94	160	225	164	190	37	31	118	54	39	70	23	31	32	21	20	74
FBgn0000286_Cf2	FBgn0000286	Chorion factor 2	Cf2	119	108	122	175	84	132	74	146	121	95	109	129	187	133	126	79	43	136	103	64	134	55	72	117	48	53	77
FBgn0000287_salr	FBgn0000287	spalt-related	salr	2	0	0	0	0	1	2	1	1	0	0	0	0	1	0	1	0	0	0	0	0	2	1	1	0	0	0
FBgn0000289_cg	FBgn0000289	combgap	cg	176	137	159	130	59	118	79	152	104	91	84	136	172	147	128	55	46	115	76	65	100	54	64	70	32	38	79
FBgn0000299_Cg25C	FBgn0000299	Collagen type IV	Cg25C	47	50	43	32	10	12	15	17	7	10	12	10	18	7	14	7	11	13	14	13	3	5	7	4	9	8	1
FBgn0000303_ChAT	FBgn0000303	Choline acetyltransferase	ChAT	2	2	1	2	1	1	2	1	3	1	0	0	1	1	2	1	0	0	1	0	2	0	1	0	0	0	2
FBgn0000307_chif	FBgn0000307	chiffon	chif	105	97	68	57	28	61	45	60	63	53	51	60	70	63	46	17	17	52	14	14	39	17	16	9	28	14	21
FBgn0000308_chic	FBgn0000308	chickadee	chic	1536	2224	2370	3906	1387	2102	3476	1909	1616	1368	1177	1727	2647	2626	2024	1043	995	1591	1979	692	1349	697	951	817	1429	954	1389
FBgn0000316_cin	FBgn0000316	cinnamon	cin	64	62	62	65	22	56	58	60	41	37	31	68	83	63	49	23	17	52	35	23	37	17	34	34	23	34	23
FBgn0000317_ck	FBgn0000317	crinkled	ck	75	77	104	45	17	39	31	36	38	29	21	34	35	47	25	20	10	42	13	15	19	7	18	10	15	4	18
FBgn0000318_cl	FBgn0000318	clot	cl	5049	2802	3422	4596	1435	1946	4978	2185	1283	1361	1213	1883	3283	2571	2912	1835	1569	1839	4392	1580	1899	2090	1592	2217	5222	3055	2014
FBgn0000319_Chc	FBgn0000319	Clathrin heavy chain	Chc	382	305	389	373	139	353	211	297	227	209	186	299	411	364	289	153	122	309	251	117	216	89	100	140	99	113	206
FBgn0000320_eya	FBgn0000320	eyes absent	eya	0	0	0	0	0	0	0	0	0	0	0	0	0	0	0	0	0	0	0	0	0	1	0	0	0	0	0
FBgn0000326_clt	FBgn0000326	cricklet	clt	62	38	74	82	24	60	68	49	35	38	42	72	73	59	49	46	38	61	85	39	76	29	46	84	78	54	94
FBgn0000330_cm	FBgn0000330	carmine	cm	32	23	40	50	17	24	28	35	31	17	21	21	21	35	30	20	18	32	41	24	24	14	22	27	33	17	29
FBgn0000337_cn	FBgn0000337	cinnabar	cn	0	0	0	0	0	0	0	0	0	0	0	0	0	0	0	0	0	0	0	0	0	0	0	0	0	0	0
FBgn0000339_cni	FBgn0000339	cornichon	cni	493	456	648	973	359	450	865	463	309	217	248	386	551	396	363	470	482	505	490	445	414	378	429	574	887	585	434
FBgn0000346_comt	FBgn0000346	comatose	comt	0	0	0	2	0	2	1	0	0	1	0	0	2	0	3	1	0	1	0	2	0	0	0	0	0	1	0
FBgn0000351_cort	FBgn0000351	cortex	cort	0	0	1	1	0	1	0	0	1	0	0	0	2	0	0	0	0	0	1	1	0	1	0	0	4	0	1
FBgn0000352_cos	FBgn0000352	costa	cos	17	15	10	13	9	4	12	13	7	4	7	8	10	13	6	8	4	9	5	9	9	5	4	9	4	6	8
FBgn0000355_Cp15	FBgn0000355	Chorion protein 15	Cp15	0	0	0	2	0	0	0	0	0	0	0	0	0	0	0	1	0	0	3	1	0	0	0	0	5	23	0
FBgn0000356_Cp16	FBgn0000356	Chorion protein 16	Cp16	0	0	0	0	0	0	1	0	0	0	0	0	0	0	1	1	0	0	2	0	0	0	0	0	2	0	0
FBgn0000357_Cp18	FBgn0000357	Chorion protein 18	Cp18	3	0	2	0	0	2	4	0	1	0	0	1	0	0	2	0	1	0	3	1	0	1	0	2	0	0	0
FBgn0000358_Cp19	FBgn0000358	Chorion protein 19	Cp19	0	0	0	0	0	0	1	0	0	0	0	0	0	0	0	1	0	0	0	0	0	0	0	0	0	0	0
FBgn0000359_Cp36	FBgn0000359	Chorion protein 36	Cp36	0	0	0	1	0	0	0	0	0	0	0	0	0	0	0	1	0	0	2	3	0	0	0	1	3	10	1
FBgn0000360_Cp38	FBgn0000360	Chorion protein 38	Cp38	1	2	0	3	3	2	0	1	0	0	1	1	0	1	0	3	1	0	0	5	0	0	2	4	3	7	6
FBgn0000370_crc	FBgn0000370	cryptocephal	crc	2164	1883	2844	2739	1004	2070	1580	2239	1615	1307	1223	2013	2305	1633	1699	1283	1063	1719	1972	1227	1561	1180	1362	1817	1239	1083	1157
FBgn0000376_crm	FBgn0000376	cramped	crm	12	8	10	9	3	7	5	10	6	6	7	15	18	17	10	12	3	12	5	10	13	2	5	7	7	1	8
FBgn0000377_crn	FBgn0000377	crooked neck	crn	82	46	75	72	26	59	48	57	59	41	22	57	85	64	58	41	23	37	82	35	48	28	33	46	37	31	43
FBgn0000382_csw	FBgn0000382	corkscrew	csw	164	131	130	152	54	113	82	150	143	107	74	157	208	139	142	65	52	160	54	63	120	40	70	57	69	75	99
FBgn0000384_cta	FBgn0000384	concertina	cta	36	35	58	70	13	52	36	57	35	32	31	59	52	41	25	35	15	45	44	24	29	16	18	31	21	17	18
FBgn0000392_cup	FBgn0000392	cup	cup	0	0	0	0	0	0	0	0	0	0	0	0	0	0	0	0	0	0	0	0	0	0	0	0	0	0	0
FBgn0000394_cv	FBgn0000394	crossveinless	cv	64	36	52	63	20	42	46	25	26	14	17	31	37	39	29	16	33	24	38	21	33	15	16	18	27	26	22
FBgn0000395_cv-2	FBgn0000395	crossveinless 2	cv-2	52	41	84	53	31	43	96	60	50	45	34	59	52	51	54	18	23	50	32	8	24	13	34	33	21	27	23
FBgn0000404_CycA	FBgn0000404	Cyclin A	CycA	13	6	11	20	8	12	27	25	15	4	7	12	10	15	12	6	7	7	11	4	8	10	8	15	19	12	2
FBgn0000405_CycB	FBgn0000405	Cyclin B	CycB	2	1	2	1	4	8	3	4	3	3	1	6	5	2	5	2	0	5	7	2	0	3	0	1	20	1	0
FBgn0000406_Cyt-b5-r	FBgn0000406	Cytochrome b5-related	Cyt-b5-r	16	17	24	136	99	118	137	75	101	37	64	41	117	105	67	65	67	131	116	49	59	25	34	65	55	43	65
FBgn0000409_Cyt-c-p	FBgn0000409	Cytochrome c proximal	Cyt-c-p	492	1456	2040	553	162	464	873	248	286	177	173	307	543	507	476	279	263	684	838	274	464	337	344	225	882	311	444
FBgn0000411_D	FBgn0000411	Dichaete	D	2	0	0	2	1	1	0	0	1	1	0	1	0	1	2	0	1	1	0	1	0	0	0	0	0	0	0
FBgn0000412_D1	FBgn0000412	D1 chromosomal protein	D1	236	178	223	184	63	130	195	141	119	107	89	131	223	169	161	99	71	116	164	66	85	94	75	103	115	120	103
FBgn0000414_Dab	FBgn0000414	Disabled	Dab	29	33	45	39	20	26	28	14	19	11	12	14	16	17	22	7	15	22	8	15	19	6	6	7	1	5	14
FBgn0000416_Sap-r	FBgn0000416	Saposin-related	Sap-r	345	243	411	501	226	691	570	660	717	523	463	828	1098	772	762	182	136	566	503	180	440	131	174	218	215	143	500
FBgn0000422_Ddc	FBgn0000422	Dopa decarboxylase	Ddc	50	48	80	97	21	60	60	38	40	23	23	52	49	32	48	20	30	44	31	37	40	34	23	28	28	37	25
FBgn0000426_SmF	FBgn0000426	Small ribonucleoprotein particle protein SmF	SmF	363	241	229	174	69	110	245	100	81	66	63	105	191	108	143	55	44	92	184	52	69	70	69	82	188	128	83
FBgn0000427_42705	FBgn0000427	defective chorion 1	42705	0	0	0	1	0	0	0	0	0	0	0	0	0	0	0	0	0	1	5	0	0	0	0	2	1	1	0
FBgn0000439_Dfd	FBgn0000439	Deformed	Dfd	0	0	0	0	1	0	0	0	0	0	0	0	0	0	0	0	0	0	0	1	0	0	0	0	0	0	0
FBgn0000442_Pkg21D	FBgn0000442	Protein kinase, cGMP-dependent at 21D	Pkg21D	33	16	13	15	6	10	16	8	9	5	13	12	19	8	9	3	4	18	11	7	13	4	3	12	3	4	9
FBgn0000447_Dhod	FBgn0000447	Dihydroorotate dehydrogenase	Dhod	296	174	256	204	65	139	146	169	130	113	106	197	232	211	174	86	59	160	165	103	118	101	107	161	130	103	120
FBgn0000448_Hr3	FBgn0000448	Hormone receptor 3	Hr3	10	6	10	5	6	2	2	3	3	1	2	4	0	2	4	1	1	4	0	1	2	3	0	1	4	2	1
FBgn0000449_dib	FBgn0000449	disembodied	dib	1	0	0	0	0	0	0	0	0	0	0	0	0	0	0	0	0	0	0	0	0	0	0	0	0	0	0
FBgn0000451_ect	FBgn0000451	ectodermal	ect	64	29	16	23	6	24	11	6	10	5	6	7	12	14	10	8	8	18	5	5	15	9	3	6	1	2	5
FBgn0000454_Dip-B	FBgn0000454	Dipeptidase B	Dip-B	1048	749	986	1275	523	834	1002	586	456	377	315	484	726	515	430	693	660	913	758	556	651	461	486	710	739	608	554
FBgn0000455_Dip-C	FBgn0000455	Dipeptidase C	Dip-C	1082	638	918	1353	441	639	1399	645	423	391	349	600	884	643	697	586	596	743	1303	442	573	500	548	924	1504	837	696
FBgn0000459_disco	FBgn0000459	disconnected	disco	46	55	79	25	8	22	8	7	26	8	7	20	13	17	17	8	9	25	11	10	24	7	3	6	4	2	9
FBgn0000463_Dl	FBgn0000463	Delta	Dl	98	78	102	52	15	61	30	38	53	41	26	45	70	32	37	11	11	31	29	14	23	18	9	16	10	12	23
FBgn0000464_Lar	FBgn0000464	Leukocyte-antigen-related-like	Lar	49	52	47	43	14	53	27	26	43	33	35	52	80	52	61	15	13	51	50	13	45	12	15	19	16	10	36
FBgn0000473_Cyp6a2	FBgn0000473	Cytochrome P450-6a2	Cyp6a2	10	5	15	17	2	9	26	13	3	10	17	9	32	16	16	17	14	39	24	18	27	16	21	19	71	85	76
FBgn0000477_DNaseII	FBgn0000477	Deoxyribonuclease II	DNaseII	39	36	47	126	28	58	127	69	55	48	39	98	120	89	99	49	64	76	87	56	70	44	62	54	159	97	86
FBgn0000479_dnc	FBgn0000479	dunce	dnc	742	757	766	647	311	716	569	568	729	497	478	698	1570	1290	1006	298	267	867	595	169	664	167	267	266	199	186	561
FBgn0000482_dor	FBgn0000482	deep orange	dor	65	40	58	49	23	32	27	51	44	31	31	49	78	57	50	22	34	22	55	25	32	18	29	36	32	35	37
FBgn0000489_Pka-C3	FBgn0000489	Protein kinase, cAMP-dependent, catalytic subunit 3	Pka-C3	158	96	164	84	38	95	49	50	93	30	32	101	65	65	97	30	23	72	24	8	40	23	21	11	12	13	33
FBgn0000490_dpp	FBgn0000490	decapentaplegic	dpp	57	43	79	57	17	41	61	36	34	27	16	44	53	26	39	16	13	43	19	15	23	11	9	9	13	8	21
FBgn0000492_Dr	FBgn0000492	Drop	Dr	0	0	0	1	0	0	0	0	0	0	0	0	0	0	0	0	0	0	0	0	0	1	0	0	0	0	0
FBgn0000497_ds	FBgn0000497	dachsous	ds	5	0	0	0	2	3	1	0	4	1	1	3	2	2	0	0	1	2	0	0	1	0	0	0	2	0	0
FBgn0000499_dsh	FBgn0000499	dishevelled	dsh	161	119	108	128	51	68	128	97	68	63	62	59	183	157	125	52	54	82	169	49	69	53	45	77	79	123	80
FBgn0000500_Dsk	FBgn0000500	Drosulfakinin	Dsk	0	0	1	0	0	0	0	0	0	0	0	0	0	0	0	0	0	0	0	0	0	0	0	0	0	0	0
FBgn0000504_dsx	FBgn0000504	doublesex	dsx	69	57	22	68	12	34	29	26	32	19	17	46	67	29	41	27	16	57	31	24	47	23	22	29	33	23	52
FBgn0000520_dwg	FBgn0000520	deformed wings	dwg	46	35	24	61	30	26	66	41	38	23	33	44	59	54	58	29	25	29	50	27	38	16	22	37	44	36	36
FBgn0000524_dx	FBgn0000524	deltex	dx	6	7	15	10	7	10	10	8	14	2	0	14	12	15	9	6	2	3	11	6	6	0	5	7	3	4	11
FBgn0000527_e	FBgn0000527	ebony	e	5	6	57	52	6	14	6	11	3	1	1	3	0	2	1	3	0	0	0	2	0	0	0	0	0	0	0
FBgn0000529_bsh	FBgn0000529	brain-specific homeobox	bsh	0	0	0	0	0	0	0	0	0	0	1	0	0	0	1	0	0	0	0	0	0	0	0	0	0	0	0
FBgn0000533_ea	FBgn0000533	easter	ea	8	7	3	14	5	5	3	2	6	3	0	11	3	8	6	4	5	9	5	4	7	9	1	9	7	8	5
FBgn0000535_eag	FBgn0000535	ether a go-go	eag	11	5	4	2	0	5	1	4	1	3	2	5	6	7	7	1	0	4	1	0	6	0	0	0	0	0	2
FBgn0000536_eas	FBgn0000536	easily shocked	eas	341	281	363	325	102	208	205	223	234	170	185	198	357	317	285	166	86	226	320	126	278	172	142	191	117	138	249
FBgn0000541_E(bx)	FBgn0000541	Enhancer of bithorax	E(bx)	244	179	170	153	55	136	75	141	151	111	128	175	142	134	147	39	43	149	20	52	102	37	47	39	32	23	51
FBgn0000542_ec	FBgn0000542	echinus	ec	7	2	2	2	0	4	0	3	3	1	1	3	1	0	0	1	1	5	1	0	1	0	0	0	1	0	3
FBgn0000543_ecd	FBgn0000543	ecdysoneless	ecd	133	112	133	150	60	73	157	106	84	78	41	92	143	130	145	69	75	94	131	66	75	45	57	87	124	111	95
FBgn0000546_EcR	FBgn0000546	Ecdysone receptor	EcR	53	56	63	54	26	47	35	44	47	29	33	51	64	52	56	32	30	41	24	19	45	16	27	27	14	12	20
FBgn0000547_ed	FBgn0000547	echinoid	ed	43	53	62	61	18	58	19	33	55	20	24	47	40	38	45	17	16	50	12	11	36	7	10	17	5	9	17
FBgn0000551_Edg78E	FBgn0000551	Ecdysone-dependent gene 78E	Edg78E	2	0	0	0	0	0	0	0	0	0	0	0	1	0	0	0	0	0	0	0	0	0	0	0	0	0	3
FBgn0000552_Edg84A	FBgn0000552	Ecdysone-dependent gene 84A	Edg84A	0	0	0	0	0	0	0	0	0	0	0	0	0	0	0	0	0	0	0	0	0	0	0	0	0	0	0
FBgn0000556_Ef1alpha48D	FBgn0000556	Elongation factor 1alpha48D	Ef1alpha48D	8635	7880	10791	6919	2760	7331	6315	7580	7666	5602	5261	8349	12755	9744	10090	2977	2590	7560	4153	2825	5674	2086	2908	3081	2489	2405	4208
FBgn0000557_Ef1alpha100E	FBgn0000557	Elongation factor 1alpha100E	Ef1alpha100E	1	1	0	3	0	5	1	0	2	1	1	0	2	1	0	2	1	2	0	0	1	0	0	0	1	2	0
FBgn0000559_EF2	FBgn0000559	Elongation factor 2	EF2	8026	5907	7751	4833	1954	5096	4399	5311	4948	3692	3402	5697	9289	7182	6648	2240	2067	5219	3967	2528	4175	1777	2186	2711	2618	2511	3867
FBgn0000560_eg	FBgn0000560	eagle	eg	0	0	0	1	0	1	0	0	0	0	0	1	0	0	1	0	0	0	0	0	0	0	0	0	0	0	0
FBgn0000562_egl	FBgn0000562	egalitarian	egl	96	99	127	81	65	64	63	77	78	48	41	92	94	73	57	52	34	88	50	54	53	31	53	66	59	31	58
FBgn0000564_Eh	FBgn0000564	Eclosion hormone	Eh	0	0	0	0	0	0	0	0	0	0	0	0	0	0	0	0	0	0	0	0	0	0	0	0	0	0	0
FBgn0000565_Eip71CD	FBgn0000565	Ecdysone-induced protein 28/29kD	Eip71CD	16	208	203	810	310	465	1059	652	578	396	384	454	815	474	403	964	477	913	1681	954	949	1004	1020	283	1813	911	1221
FBgn0000566_Eip55E	FBgn0000566	Eip55E	Eip55E	1030	872	965	579	238	398	413	315	280	220	189	326	460	323	415	285	246	436	335	225	396	268	239	399	308	293	402
FBgn0000567_Eip74EF	FBgn0000567	Ecdysone-induced protein 74EF	Eip74EF	131	221	244	94	32	99	66	71	77	53	46	63	84	95	94	27	23	79	29	24	39	20	22	27	27	18	35
FBgn0000568_Eip75B	FBgn0000568	Ecdysone-induced protein 75B	Eip75B	164	234	256	270	115	252	178	304	262	216	204	342	505	389	484	127	103	237	274	108	257	117	125	140	88	102	163
FBgn0000575_emc	FBgn0000575	extra macrochaetae	emc	381	305	377	453	138	276	195	331	277	210	283	333	313	247	239	170	143	272	119	112	211	97	143	111	81	61	80
FBgn0000576_ems	FBgn0000576	empty spiracles	ems	0	2	2	0	1	0	0	2	0	1	0	2	2	1	1	0	1	0	0	0	0	0	1	1	2	0	0
FBgn0000577_en	FBgn0000577	engrailed	en	1	0	2	0	0	0	0	0	0	1	0	0	0	0	0	1	0	0	0	0	0	0	0	1	0	1	0
FBgn0000578_ena	FBgn0000578	enabled	ena	335	249	393	250	107	201	138	199	159	147	90	192	228	195	169	73	41	114	113	36	81	19	44	62	50	69	72
FBgn0000579_Eno	FBgn0000579	Enolase	Eno	4283	2737	3625	2067	712	1274	1180	1056	729	578	575	952	1176	1055	971	1196	1125	1435	1400	762	1175	879	828	1241	1367	1206	998
FBgn0000581_E(Pc)	FBgn0000581	Enhancer of Polycomb	E(Pc)	174	148	154	115	49	98	84	126	133	98	91	145	148	123	147	39	28	90	44	51	82	28	38	46	25	29	62
FBgn0000588_esc	FBgn0000588	extra sexcombs	esc	24	20	13	6	2	4	1	14	2	8	6	5	8	1	6	4	1	8	7	1	2	1	5	4	7	3	4
FBgn0000591_E(spl)m8-HLH	FBgn0000591	Enhancer of split m8, helix-loop-helix	E(spl)m8-HLH	0	0	0	1	0	0	0	0	1	0	0	0	0	0	0	0	0	0	0	0	0	0	0	0	0	0	0
FBgn0000592_Est-6	FBgn0000592	Esterase 6	Est-6	2	2	3	51	1	36	14	31	3	31	1	50	16	24	41	5	12	20	7	9	16	1	8	4	9	5	7
FBgn0000594_Est-P	FBgn0000594	Esterase P	Est-P	0	0	0	0	0	0	0	0	0	0	0	0	0	0	0	0	0	0	0	0	0	0	0	0	0	0	0
FBgn0000606_eve	FBgn0000606	even skipped	eve	0	0	0	0	0	0	0	0	0	0	0	0	0	0	0	0	0	0	0	0	0	0	0	0	0	0	0
FBgn0000611_exd	FBgn0000611	extradenticle	exd	86	88	113	126	58	98	65	105	99	74	64	114	154	110	95	68	53	82	103	64	89	49	62	86	54	70	65
FBgn0000615_exu	FBgn0000615	exuperantia	exu	69	68	98	54	20	45	22	41	28	23	21	38	31	33	32	15	13	31	14	18	28	16	14	19	27	20	13
FBgn0000617_e(y)1	FBgn0000617	enhancer of yellow 1	e(y)1	140	107	168	155	49	91	149	96	54	57	66	77	115	94	85	53	44	84	113	65	76	51	46	69	80	72	62
FBgn0000618_e(y)2	FBgn0000618	enhancer of yellow 2	e(y)2	49	38	42	78	27	36	75	31	26	30	16	34	47	57	33	37	28	32	51	31	26	25	26	31	51	36	35
FBgn0000625_eyg	FBgn0000625	eyegone	eyg	0	0	0	3	2	1	1	5	0	1	0	1	1	5	1	1	0	4	0	1	0	0	1	4	0	1	0
FBgn0000629_E(z)	FBgn0000629	Enhancer of zeste	E(z)	105	66	83	114	52	94	76	77	84	67	48	83	121	104	71	50	42	84	72	42	84	27	29	72	34	27	66
FBgn0000633_fas	FBgn0000633	faint sausage	fas	24	24	23	8	6	7	5	8	12	5	4	13	15	4	10	3	1	13	5	8	5	2	0	1	3	2	3
FBgn0000635_Fas2	FBgn0000635	Fasciclin 2	Fas2	457	349	435	371	157	328	220	305	300	244	221	286	434	449	349	119	106	285	115	88	167	68	96	118	72	90	183
FBgn0000636_Fas3	FBgn0000636	Fasciclin 3	Fas3	176	122	205	206	65	157	96	176	110	104	98	179	136	129	126	68	56	116	72	56	74	48	42	98	45	52	71
FBgn0000639_Fbp1	FBgn0000639	Fat body protein 1	Fbp1	21	37	57	75	3	9	19	0	0	0	0	0	0	0	0	34	8	8	1	3	0	0	16	0	1	0	0
FBgn0000640_Fbp2	FBgn0000640	Fat body protein 2	Fbp2	344	173	82	492	26	25	38	6	2	5	1	3	4	2	1	173	53	18	4	4	6	3	44	1	5	0	0
FBgn0000644_Fcp3C	FBgn0000644	Follicle cell protein 3C	Fcp3C	4	2	2	3	2	1	6	2	3	3	1	3	4	3	1	0	3	9	2	3	2	5	2	6	4	1	5
FBgn0000658_fj	FBgn0000658	four-jointed	fj	1	3	5	6	1	2	1	0	1	1	0	1	0	1	0	1	1	1	2	0	0	0	0	1	0	0	0
FBgn0000659_fkh	FBgn0000659	fork head	fkh	420	289	322	306	160	225	172	283	209	212	177	224	300	222	309	104	109	192	136	67	135	57	88	98	64	43	90
FBgn0000662_fl(2)d	FBgn0000662	female lethal d	fl(2)d	54	45	63	48	24	46	32	54	52	32	28	52	74	60	39	22	17	53	27	28	39	18	33	33	25	19	18
FBgn0000667_Actn	FBgn0000667	alpha actinin	Actn	97	105	127	89	37	63	31	40	61	15	38	29	39	29	32	36	30	58	40	33	34	28	15	14	13	7	15
FBgn0000709_fliI	FBgn0000709	flightless I	fliI	76	57	61	75	37	44	31	59	50	33	47	41	65	64	38	32	26	43	30	34	37	23	31	33	15	35	33
FBgn0000711_flw	FBgn0000711	flapwing	flw	613	699	972	565	259	474	337	461	374	356	290	403	544	530	441	216	182	418	257	146	285	133	200	209	164	192	284
FBgn0000715_FMRFa	FBgn0000715	FMRFamide	FMRFa	0	0	0	0	0	0	0	0	0	0	0	0	0	0	0	0	0	0	0	0	0	0	0	0	0	0	0
FBgn0000719_fog	FBgn0000719	folded gastrulation	fog	45	32	31	42	9	29	19	37	31	33	24	46	34	29	29	8	14	21	12	15	20	7	9	19	14	14	15
FBgn0000721_for	FBgn0000721	foraging	for	1921	1428	1617	1777	903	1556	655	1981	1452	1195	1324	1830	1615	1217	1456	894	810	1480	942	976	1629	778	860	1357	549	426	780
FBgn0000723_FER	FBgn0000723	FER ortholog (H. sapiens)	FER	657	620	669	401	230	264	298	400	370	327	279	341	604	474	401	201	174	341	277	195	326	181	192	186	146	189	185
FBgn0000808_gd	FBgn0000808	gastrulation-defective	gd	0	0	0	0	0	0	0	0	0	0	0	0	0	0	0	0	0	0	0	0	0	0	0	0	0	0	0
FBgn0000810_fs(1)K10	FBgn0000810	female sterile (1) K10	fs(1)K10	22	12	17	15	6	17	10	12	11	8	10	11	26	23	20	4	5	8	8	4	11	7	4	8	4	4	11
FBgn0000826_png	FBgn0000826	pan gu	png	2	0	0	1	3	1	2	1	3	0	3	0	1	3	1	3	4	2	3	0	2	3	0	1	7	2	2
FBgn0000927_fs(1)Ya	FBgn0000927	female sterile (1) Young arrest	fs(1)Ya	1	3	0	0	0	0	1	2	0	0	0	0	3	0	1	1	0	3	3	0	0	0	0	0	3	1	1
FBgn0000928_fs(1)Yb	FBgn0000928	female sterile (1) Yb	fs(1)Yb	0	0	0	0	0	0	0	0	0	1	0	0	0	0	0	0	0	0	0	0	0	0	0	0	0	0	0
FBgn0000964_tj	FBgn0000964	traffic jam	tj	0	1	0	1	0	0	1	0	0	0	0	0	0	0	0	0	0	0	0	0	1	0	0	2	0	0	0
FBgn0000996_dup	FBgn0000996	double parked	dup	56	36	29	11	3	11	6	19	13	13	8	16	6	6	11	5	8	14	9	7	6	9	7	11	4	2	8
FBgn0001075_ft	FBgn0001075	fat	ft	6	5	7	1	2	3	1	3	6	2	2	6	2	6	2	2	1	1	0	4	6	1	0	2	1	0	1
FBgn0001077_ftz	FBgn0001077	fushi tarazu	ftz	0	0	0	0	0	0	0	0	0	0	0	0	0	0	0	0	0	0	0	0	0	0	0	0	0	0	0
FBgn0001078_ftz-f1	FBgn0001078	ftz transcription factor 1	ftz-f1	143	131	135	162	63	130	47	146	148	139	95	167	148	129	137	60	41	134	59	50	123	40	57	59	30	18	59
FBgn0001079_fu	FBgn0001079	fused	fu	9	7	9	13	5	12	9	13	13	10	5	4	16	8	11	7	7	11	16	6	6	8	2	4	2	1	5
FBgn0001083_fw	FBgn0001083	furrowed	fw	4	0	3	2	0	0	0	0	0	0	0	0	0	0	1	1	1	0	0	0	0	0	0	0	0	0	0
FBgn0001084_fy	FBgn0001084	fuzzy	fy	1	1	5	9	1	3	3	1	7	6	7	2	4	7	4	4	1	4	4	4	8	4	7	4	2	1	2
FBgn0001085_fz	FBgn0001085	frizzled	fz	59	55	77	86	34	61	24	55	41	36	27	66	40	33	49	24	19	67	16	12	30	11	21	16	6	5	13
FBgn0001086_fzy	FBgn0001086	fizzy	fzy	2	2	2	2	1	1	6	3	2	2	3	1	5	0	2	0	1	2	4	3	4	7	1	4	3	2	0
FBgn0001087_g	FBgn0001087	garnet	g	181	128	151	219	97	137	73	159	125	108	106	134	149	133	115	80	90	131	54	106	119	69	71	115	41	50	98
FBgn0001089_Gal	FBgn0001089	beta galactosidase	Gal	2832	1541	2986	6085	1993	3440	1384	2161	1802	1095	1118	1373	1460	810	1017	3135	2972	3185	2136	1462	2043	1107	1269	2464	1466	1066	945
FBgn0001090_bnb	FBgn0001090	bangles and beads	bnb	13	3	3	3	0	2	2	0	2	2	0	0	1	2	3	1	1	2	0	0	0	0	1	0	0	0	0
FBgn0001091_Gapdh1	FBgn0001091	Glyceraldehyde 3 phosphate dehydrogenase 1	Gapdh1	2223	1433	2276	2496	814	1283	1666	872	718	510	503	785	885	784	799	1074	1261	1320	1252	798	909	761	814	1216	1434	1058	1033
FBgn0001092_Gapdh2	FBgn0001092	Glyceraldehyde 3 phosphate dehydrogenase 2	Gapdh2	6460	5313	7676	5306	1819	3783	2202	2848	1811	1458	1251	1998	3010	1986	2068	2987	2768	3888	5269	1994	2613	1774	1885	3184	1755	2131	2285
FBgn0001098_Gdh	FBgn0001098	Glutamate dehydrogenase	Gdh	1299	1078	1146	635	247	602	321	357	436	222	192	414	451	348	362	354	252	677	314	258	408	214	190	310	179	191	429
FBgn0001099_gdl	FBgn0001099	gonadal	gdl	6	4	6	6	2	3	5	5	2	2	0	3	3	2	7	2	1	3	4	2	5	0	1	2	3	1	4
FBgn0001104_Galphai	FBgn0001104	G protein alpha i subunit	Galphai	597	622	691	891	438	513	503	623	439	386	331	394	783	716	585	435	425	566	554	453	484	413	308	491	489	659	510
FBgn0001105_Gbeta13F	FBgn0001105	G protein beta-subunit 13F	Gbeta13F	3212	2722	2992	3640	1419	2206	2422	2640	1763	1556	1385	2262	3914	2975	2918	1475	1274	1964	4899	1192	1766	1139	1303	1742	1754	1869	1720
FBgn0001108_DCTN1-p150	FBgn0001108	Dynactin 1, p150 subunit	DCTN1-p150	144	112	133	178	60	81	69	125	90	92	69	103	118	86	107	58	51	88	141	73	97	69	71	94	52	47	69
FBgn0001112_Gld	FBgn0001112	Glucose dehydrogenase	Gld	0	0	1	0	0	0	0	0	0	0	0	0	0	0	0	0	0	0	0	0	1	0	0	0	0	0	0
FBgn0001114_Glt	FBgn0001114	Glutactin	Glt	12	6	25	9	1	4	2	1	2	0	4	2	1	1	5	4	6	5	8	1	3	2	3	0	0	1	1
FBgn0001120_gnu	FBgn0001120	giant nuclei	gnu	0	1	1	2	1	0	1	0	0	0	0	0	0	1	1	0	0	0	1	0	1	1	0	0	28	2	1
FBgn0001122_Galphao	FBgn0001122	G protein alpha o subunit	Galphao	491	453	500	240	117	235	132	160	186	98	91	144	149	148	172	86	88	211	66	48	117	50	43	68	40	41	110
FBgn0001123_Galphas	FBgn0001123	G protein alpha s subunit	Galphas	123	97	138	139	55	101	80	103	86	60	70	89	117	80	84	46	57	84	64	40	74	42	36	64	31	25	55
FBgn0001124_Got1	FBgn0001124	Glutamate oxaloacetate transaminase 1	Got1	761	716	909	462	188	309	291	238	189	135	126	190	290	233	201	262	270	391	256	175	209	164	199	232	308	355	251
FBgn0001125_Got2	FBgn0001125	Glutamate oxaloacetate transaminase 2	Got2	2548	1609	1952	955	278	481	547	368	264	210	169	319	406	328	372	440	414	553	632	261	388	268	286	447	609	538	500
FBgn0001128_Gpdh	FBgn0001128	Glycerol 3 phosphate dehydrogenase	Gpdh	3228	3268	4005	1878	648	1531	1011	1275	1091	654	673	1022	1331	956	946	1088	896	1579	1238	848	1255	774	886	1354	886	867	976
FBgn0001133_grau	FBgn0001133	grauzone	grau	50	52	64	66	39	31	56	44	43	37	31	39	56	74	46	29	31	57	46	33	40	39	30	51	33	40	32
FBgn0001134_Grd	FBgn0001134	Glycine receptor	Grd	0	0	1	0	0	0	0	0	0	0	0	0	0	0	0	0	0	0	0	0	1	0	0	0	0	0	0
FBgn0001137_grk	FBgn0001137	gurken	grk	10	8	18	18	5	11	15	7	9	5	2	14	11	9	12	6	3	10	12	3	6	6	3	3	7	3	9
FBgn0001138_grn	FBgn0001138	grain	grn	0	0	1	5	0	0	0	0	2	2	0	0	0	1	0	0	1	0	0	0	0	1	0	1	0	0	1
FBgn0001139_gro	FBgn0001139	groucho	gro	511	395	435	437	207	322	234	380	305	250	252	320	560	444	418	198	159	277	404	218	270	179	183	263	193	195	262
FBgn0001142_Gs1	FBgn0001142	Glutamine synthetase 1	Gs1	420	288	470	640	222	351	514	390	331	236	225	416	553	415	507	282	248	454	1067	330	461	275	318	486	581	362	349
FBgn0001145_Gs2	FBgn0001145	Glutamine synthetase 2	Gs2	1801	1730	2283	2377	1020	2365	1469	1464	1931	1381	1000	2288	3304	2850	2416	1141	1070	3113	2635	1137	2491	739	753	997	702	780	2407
FBgn0001147_gsb-n	FBgn0001147	gooseberry-neuro	gsb-n	0	0	0	0	0	0	0	0	0	0	0	0	0	0	0	0	0	0	0	0	0	0	0	0	0	0	0
FBgn0001148_gsb	FBgn0001148	gooseberry	gsb	0	0	0	1	0	0	0	0	0	0	0	0	0	1	0	0	0	0	0	0	0	0	0	0	1	0	0
FBgn0001149_GstD1	FBgn0001149	Glutathione S transferase D1	GstD1	8652	6076	8957	10439	2954	4839	4485	2845	1792	1563	1459	2176	2183	1902	2039	4230	4525	4528	4151	2202	2572	2741	2762	4488	6575	5204	3809
FBgn0001150_gt	FBgn0001150	giant	gt	3	2	2	0	0	0	1	0	0	1	0	0	1	0	3	0	0	2	0	0	1	0	0	0	0	0	0
FBgn0001168_h	FBgn0001168	hairy	h	1218	968	1421	974	494	1264	735	1156	1254	859	1000	1311	1180	1071	1419	358	452	983	341	363	890	333	413	511	264	220	573
FBgn0001169_H	FBgn0001169	Hairless	H	36	50	42	47	23	50	27	49	39	35	28	36	43	35	45	20	9	52	30	15	29	20	18	16	13	13	22
FBgn0001170_H2.0	FBgn0001170	Homeodomain protein 2.0	H2.0	23	20	21	14	4	11	7	9	13	2	4	17	13	5	7	4	3	9	10	3	9	8	6	5	5	1	7
FBgn0001174_halo	FBgn0001174	halo	halo	0	0	0	0	0	0	0	0	0	0	0	0	0	0	0	0	0	0	0	0	0	0	0	0	0	0	0
FBgn0001179_hay	FBgn0001179	haywire	hay	50	25	32	41	16	22	22	26	28	23	14	30	39	28	30	9	9	21	30	7	18	14	11	18	13	16	31
FBgn0001180_hb	FBgn0001180	hunchback	hb	5	5	15	4	0	9	3	2	3	1	4	4	2	0	0	1	3	4	2	2	2	1	0	1	2	0	0
FBgn0001185_her	FBgn0001185	hermaphrodite	her	92	86	105	79	35	74	73	77	93	64	51	54	162	107	100	24	37	67	78	21	73	21	21	35	34	28	63
FBgn0001186_Hex-A	FBgn0001186	Hexokinase A	Hex-A	959	705	820	1032	523	779	791	842	665	490	528	686	1085	839	726	422	464	712	736	322	472	293	359	463	467	491	660
FBgn0001187_Hex-C	FBgn0001187	Hexokinase C	Hex-C	488	334	327	136	66	132	165	99	91	43	60	91	195	142	161	103	89	173	158	72	111	65	90	123	140	99	117
FBgn0001189_hfw	FBgn0001189	halfway	hfw	405	298	284	341	153	339	198	368	293	241	235	316	515	360	356	138	129	310	400	122	248	87	124	197	107	118	244
FBgn0001197_His2Av	FBgn0001197	Histone H2A variant	His2Av	371	367	420	183	74	119	242	146	113	106	76	142	270	215	179	73	45	136	174	54	93	57	52	60	61	77	91
FBgn0001202_hook	FBgn0001202	hook	hook	64	42	50	65	29	56	47	50	48	43	27	48	72	56	60	29	21	44	39	26	45	24	25	43	26	44	46
FBgn0001206_Hmr	FBgn0001206	Hybrid male rescue	Hmr	5	2	3	2	1	1	2	2	5	2	4	2	2	3	3	0	2	2	0	2	1	1	0	1	0	0	0
FBgn0001208_Hn	FBgn0001208	Henna	Hn	3	1	3	5	2	1	0	0	0	1	3	0	0	0	0	2	1	0	1	0	0	2	0	0	0	0	0
FBgn0001215_Hrb98DE	FBgn0001215	Heterogeneous nuclear ribonucleoprotein at 98DE	Hrb98DE	526	354	392	328	101	288	204	240	298	217	210	310	408	312	330	136	85	270	282	109	223	110	95	190	125	141	172
FBgn0001216_Hsc70-1	FBgn0001216	Heat shock protein cognate 1	Hsc70-1	17	19	8	2	3	2	1	2	2	0	1	0	4	1	0	3	2	2	0	2	2	0	1	0	1	0	2
FBgn0001217_Hsc70-2	FBgn0001217	Heat shock protein cognate 2	Hsc70-2	22	16	10	30	9	14	22	4	11	5	10	8	10	10	27	11	3	9	10	3	7	10	8	15	7	8	16
FBgn0001218_Hsc70-3	FBgn0001218	Heat shock 70-kDa protein cognate 3	Hsc70-3	9432	12722	11279	3738	1458	4526	2294	2786	2765	2760	1961	3212	6453	5240	6228	2481	2026	5367	6311	2478	5666	3637	2710	2806	3368	2490	5766
FBgn0001220_Hsc70-5	FBgn0001220	Heat shock protein cognate 5	Hsc70-5	1948	1373	1370	513	161	416	518	409	359	289	263	470	710	476	556	191	189	434	624	213	374	240	219	289	394	293	308
FBgn0001222_Hsf	FBgn0001222	Heat shock factor	Hsf	127	100	135	133	56	107	82	114	107	71	61	109	143	120	110	46	48	95	117	64	101	51	62	87	59	56	62
FBgn0001223_Hsp22	FBgn0001223	Heat shock protein 22	Hsp22	0	0	0	0	0	0	0	0	0	0	0	0	0	0	0	0	0	0	0	0	0	0	0	0	0	0	0
FBgn0001224_Hsp23	FBgn0001224	Heat shock protein 23	Hsp23	549	450	557	179	50	253	186	60	81	40	24	243	97	42	147	62	34	75	311	23	44	111	35	100	37	112	109
FBgn0001225_Hsp26	FBgn0001225	Heat shock protein 26	Hsp26	1363	1156	1366	399	150	611	642	146	303	66	83	879	323	151	515	172	197	337	326	89	231	317	145	329	280	270	463
FBgn0001226_Hsp27	FBgn0001226	Heat shock protein 27	Hsp27	1693	1631	1569	546	232	794	368	203	420	171	130	1032	360	241	637	253	287	526	146	114	401	290	189	347	159	265	585
FBgn0001227_Hsp67Ba	FBgn0001227	Heat shock gene 67Ba	Hsp67Ba	3	3	2	1	2	4	1	3	3	1	0	2	0	0	0	3	1	1	2	0	1	4	0	3	2	0	5
FBgn0001228_CG4456	FBgn0001228	0	CG4456	0	0	0	0	0	0	0	0	0	0	0	0	0	0	0	0	0	0	0	0	0	0	0	0	0	0	0
FBgn0001229_Hsp67Bc	FBgn0001229	Heat shock gene 67Bc	Hsp67Bc	59	72	47	5	2	13	3	3	4	1	2	9	2	1	6	3	3	12	2	0	2	3	0	6	0	2	5
FBgn0001230_Hsp68	FBgn0001230	Heat shock protein 68	Hsp68	304	472	568	98	30	186	84	37	81	18	17	176	58	39	136	54	33	86	37	21	65	80	39	41	30	61	114
FBgn0001233_Hsp83	FBgn0001233	Heat shock protein 83	Hsp83	5351	4895	2677	1158	440	1005	1034	741	929	675	715	1402	1617	1361	1977	419	276	821	591	460	1167	738	460	536	573	870	1099
FBgn0001234_Hsromega	FBgn0001234	Heat shock RNA omega	Hsromega	2408	2668	2277	1151	424	1285	473	842	1303	767	656	1388	725	778	952	414	388	1233	276	236	931	288	370	391	179	152	507
FBgn0001235_hth	FBgn0001235	homothorax	hth	348	357	365	238	100	267	167	205	302	166	209	271	443	418	315	99	75	301	126	65	202	54	70	72	52	57	161
FBgn0001247_Ide	FBgn0001247	Insulin degrading metalloproteinase	Ide	247	221	308	110	47	121	86	104	135	98	76	159	178	150	157	53	50	164	43	32	98	34	40	53	32	16	70
FBgn0001248_Idh	FBgn0001248	Isocitrate dehydrogenase	Idh	2325	1534	2611	3900	1352	2612	1235	1494	1310	874	967	1496	2256	1813	1694	2674	2463	3009	1936	1239	2272	1667	1586	2965	1787	1906	2330
FBgn0001250_if	FBgn0001250	inflated	if	73	104	134	102	27	62	27	44	65	23	15	37	25	31	30	34	24	48	17	15	24	8	13	23	11	8	12
FBgn0001253_ImpE1	FBgn0001253	Ecdysone-inducible gene E1	ImpE1	11	2	1	1	0	0	0	0	0	0	2	1	0	1	1	0	0	1	0	0	1	0	0	0	0	0	0
FBgn0001254_ImpE2	FBgn0001254	Ecdysone-inducible gene E2	ImpE2	0	0	0	0	0	0	0	0	0	0	0	0	0	0	0	0	0	0	0	0	0	0	0	0	0	0	0
FBgn0001255_ImpE3	FBgn0001255	Ecdysone-inducible gene E3	ImpE3	4	3	4	0	0	4	0	2	2	2	3	1	4	1	1	2	1	1	0	2	1	0	1	2	0	2	2
FBgn0001256_ImpL1	FBgn0001256	Ecdysone-inducible gene L1	ImpL1	0	0	0	0	0	0	0	0	0	0	0	0	0	0	0	0	0	0	0	0	1	0	0	0	0	0	0
FBgn0001257_ImpL2	FBgn0001257	Ecdysone-inducible gene L2	ImpL2	269	165	405	808	267	601	549	760	456	462	209	550	224	544	222	166	39	96	74	43	97	17	39	45	25	44	103
FBgn0001258_ImpL3	FBgn0001258	Ecdysone-inducible gene L3	ImpL3	4280	2955	4626	1193	411	756	596	783	446	360	350	452	445	334	428	412	286	537	468	225	279	233	244	264	289	304	231
FBgn0001259_in	FBgn0001259	inturned	in	0	0	0	1	0	0	0	0	1	0	1	0	0	1	2	0	0	0	0	1	0	0	2	0	0	0	2
FBgn0001263_inaD	FBgn0001263	inactivation no afterpotential D	inaD	0	0	0	0	0	0	0	0	0	0	0	0	0	0	0	0	0	0	0	0	0	0	0	0	0	0	0
FBgn0001269_inv	FBgn0001269	invected	inv	1	0	0	4	0	0	0	0	0	0	0	1	0	0	0	0	2	1	1	0	1	1	0	0	0	1	0
FBgn0001276_ix	FBgn0001276	intersex	ix	37	35	40	45	22	36	25	34	34	22	21	29	63	37	31	21	19	47	21	21	33	21	14	27	20	17	30
FBgn0001280_janA	FBgn0001280	janus A	janA	45	30	39	36	14	36	16	27	23	16	16	25	43	26	30	15	20	32	36	19	17	20	19	30	18	25	24
FBgn0001281_janB	FBgn0001281	janus B	janB	1	0	0	0	0	0	0	1	1	0	0	0	0	0	3	2	0	0	0	0	0	0	0	0	0	0	0
FBgn0001285_Jon44E	FBgn0001285	Jonah 44E	Jon44E	969	983	1428	4222	1668	1624	2922	1764	1307	757	902	1214	1512	1434	891	2604	2169	2835	3258	3554	2931	2700	2577	3379	5117	3490	3010
FBgn0001291_Jra	FBgn0001291	Jun-related antigen	Jra	167	153	315	374	83	202	245	273	212	175	160	239	236	183	245	106	75	139	175	90	157	96	132	166	89	107	135
FBgn0001296_kar	FBgn0001296	karmoisin	kar	55	81	66	29	7	19	39	31	25	22	20	30	56	64	45	6	6	16	44	9	17	11	13	8	23	24	13
FBgn0001297_kay	FBgn0001297	kayak	kay	747	582	708	633	224	418	336	477	367	323	261	581	433	492	576	194	161	306	342	164	206	206	155	195	128	189	180
FBgn0001301_kel	FBgn0001301	kelch	kel	23	22	29	25	8	29	17	19	21	7	9	24	17	14	10	8	12	19	29	8	14	9	3	15	8	7	12
FBgn0001308_Khc	FBgn0001308	Kinesin heavy chain	Khc	270	266	317	346	148	234	149	222	168	177	110	180	229	217	194	126	119	194	149	105	138	120	90	125	96	116	110
FBgn0001311_kkv	FBgn0001311	krotzkopf verkehrt	kkv	3	1	2	2	0	1	0	1	1	0	0	0	1	1	0	0	0	0	1	0	0	0	0	0	0	0	1
FBgn0001313_kl-2	FBgn0001313	male fertility factor kl2	kl-2	0	0	0	0	0	0	0	0	0	0	0	0	0	1	0	0	0	0	0	0	0	0	0	0	0	0	0
FBgn0001316_klar	FBgn0001316	klarsicht	klar	946	861	891	1536	667	1035	694	1136	925	751	736	1014	1353	1141	1138	557	519	1050	777	565	798	419	556	534	414	438	598
FBgn0001319_kn	FBgn0001319	knot	kn	0	0	0	0	0	0	0	2	0	1	0	0	0	0	0	0	0	0	0	1	0	0	0	0	0	0	1
FBgn0001320_kni	FBgn0001320	knirps	kni	29	18	15	35	15	23	22	14	18	8	14	17	37	15	31	12	14	16	22	11	24	9	5	19	15	13	15
FBgn0001321_knk	FBgn0001321	knickkopf	knk	11	8	14	10	6	6	1	5	7	5	5	9	12	8	10	4	3	5	3	1	2	0	6	1	2	0	3
FBgn0001323_knrl	FBgn0001323	knirps-like	knrl	24	23	21	16	7	9	20	9	14	5	7	13	14	12	14	4	7	18	4	3	7	4	4	11	3	3	13
FBgn0001324_kto	FBgn0001324	kohtalo	kto	63	33	50	46	29	41	24	40	31	23	17	36	45	38	45	18	15	36	34	11	23	11	24	22	13	15	28
FBgn0001325_Kr	FBgn0001325	Kruppel	Kr	0	0	0	1	0	0	0	0	0	0	0	0	0	1	0	0	0	0	1	0	1	0	0	0	0	0	0
FBgn0001330_kz	FBgn0001330	kurz	kz	107	71	39	44	14	29	23	47	51	40	31	22	46	31	33	17	13	35	17	28	31	21	23	28	10	12	18
FBgn0001341_l(1)1Bi	FBgn0001341	lethal (1) 1Bi	l(1)1Bi	77	52	48	31	8	18	13	38	28	16	20	25	42	23	25	17	7	16	12	13	20	12	24	16	7	9	14
FBgn0001404_egh	FBgn0001404	egghead	egh	1216	1075	1238	975	421	762	792	801	643	553	447	686	1208	1014	786	312	326	549	644	276	407	188	263	249	265	307	361
FBgn0001491_l(1)10Bb	FBgn0001491	lethal (1) 10Bb	l(1)10Bb	67	86	96	121	30	75	98	79	72	55	47	78	108	73	70	44	43	68	87	52	76	50	55	64	56	64	39
FBgn0001565_Hlc	FBgn0001565	Helicase	Hlc	210	144	163	293	130	210	293	280	226	205	178	293	496	349	348	130	114	172	375	111	177	93	113	144	144	133	138
FBgn0001612_Grip91	FBgn0001612	Gamma-tubulin ring protein 91	Grip91	20	6	3	6	4	6	2	4	6	3	3	8	6	3	4	1	4	6	2	1	3	2	2	0	1	4	1
FBgn0001624_dlg1	FBgn0001624	discs large 1	dlg1	442	362	361	281	106	232	86	206	211	140	123	220	180	152	172	86	76	185	88	58	162	57	76	87	41	36	77
FBgn0001941_ifc	FBgn0001941	infertile crescent	ifc	1194	1300	1984	2941	1254	1550	2814	2026	1325	1259	1055	1372	2785	2340	1677	1198	1069	1520	3775	1282	1601	1247	1255	2027	3215	3031	2193
FBgn0001942_eIF-4a	FBgn0001942	Eukaryotic initiation factor 4a	eIF-4a	3520	3388	4268	4517	1630	2488	4244	3424	2542	2165	1904	2674	4983	4208	3823	1961	1798	2537	3217	2065	2444	1895	1908	1950	2261	2539	1835
FBgn0001961_Arpc1	FBgn0001961	Actin-related protein 2/3 complex, subunit 1	Arpc1	369	492	558	1039	398	451	833	465	302	263	268	269	449	408	345	350	324	406	416	292	312	282	287	352	511	438	262
FBgn0001965_Sos	FBgn0001965	Son of sevenless	Sos	12	15	25	14	10	11	12	20	13	13	9	12	26	17	13	12	6	11	14	5	12	4	7	6	9	7	9
FBgn0001967_NimC3	FBgn0001967	Nimrod C3	NimC3	1	0	3	0	0	0	0	0	0	0	0	0	0	0	0	0	0	0	0	0	0	0	0	0	0	0	0
FBgn0001970_Pgant35A	FBgn0001970	Polypeptide N-acetylgalactosaminyltransferase 35A	Pgant35A	8	9	20	20	10	12	15	13	14	6	7	8	12	12	11	7	9	6	20	7	8	14	8	15	12	6	10
FBgn0001974_l(2)35Bd	FBgn0001974	lethal (2) 35Bd	l(2)35Bd	6	8	22	12	2	13	6	10	10	8	15	6	19	12	12	8	2	7	12	2	8	2	3	4	6	4	8
FBgn0001977_CIAPIN1	FBgn0001977	CIAPIN1 ortholog	CIAPIN1	91	47	76	90	33	46	96	66	54	35	39	41	73	57	49	33	36	46	92	47	45	45	41	63	77	85	59
FBgn0001978_stc	FBgn0001978	shuttle craft	stc	155	100	120	119	47	89	85	85	94	67	69	98	144	95	101	55	45	57	152	47	70	63	61	56	78	69	51
FBgn0001981_esg	FBgn0001981	escargot	esg	9	8	14	23	7	11	9	10	15	12	15	15	34	34	22	1	1	7	2	1	16	4	8	2	9	0	13
FBgn0001983_wor	FBgn0001983	worniu	wor	0	0	0	0	0	0	0	0	0	0	0	0	0	0	0	0	0	0	0	0	0	0	0	0	0	0	0
FBgn0001986_l(2)35Df	FBgn0001986	lethal (2) 35Df	l(2)35Df	23	27	28	14	10	11	13	26	25	10	9	24	14	17	25	3	2	13	12	8	17	6	10	9	8	4	13
FBgn0001987_Gli	FBgn0001987	Gliotactin	Gli	150	151	224	274	109	194	174	193	189	109	120	214	183	185	210	82	87	164	187	85	96	98	125	106	98	125	79
FBgn0001989_ND-B17	FBgn0001989	NADH dehydrogenase (ubiquinone) B17 subunit	ND-B17	1225	851	1147	1170	496	926	915	776	570	407	414	667	1086	865	839	750	764	1096	1149	695	768	629	587	937	1195	1113	817
FBgn0001990_wek	FBgn0001990	weckle	wek	4	13	10	9	3	9	9	4	8	10	10	16	10	10	7	5	4	7	7	3	8	2	3	6	5	6	2
FBgn0001991_Ca-alpha1D	FBgn0001991	Ca[2+]-channel protein alpha[[1]] subunit D	Ca-alpha1D	30	32	37	24	15	22	16	18	25	11	9	30	23	21	18	7	15	18	6	1	6	6	6	11	6	2	14
FBgn0001992_Cyp303a1	FBgn0001992	Cyp303a1	Cyp303a1	4	0	0	1	0	0	1	1	0	0	0	0	1	0	0	1	0	3	0	0	1	0	0	0	0	0	0
FBgn0001994_crp	FBgn0001994	cropped	crp	225	219	211	240	120	202	189	205	217	151	175	225	384	380	311	91	106	170	258	103	162	78	115	128	118	136	181
FBgn0001995_mRpL4	FBgn0001995	mitochondrial ribosomal protein L4	mRpL4	329	218	245	222	80	136	185	145	108	76	79	126	180	155	115	104	97	195	146	111	108	100	104	127	136	107	111
FBgn0002021_l(2)37Bb	FBgn0002021	lethal (2) 37Bb	l(2)37Bb	186	126	173	127	50	75	149	91	66	50	48	91	131	114	99	66	50	86	94	75	86	53	48	83	115	73	61
FBgn0002022_Catsup	FBgn0002022	Catecholamines up	Catsup	470	459	635	654	294	518	435	471	359	304	262	445	651	529	418	402	377	651	443	479	581	423	385	623	440	452	460
FBgn0002023_Lim3	FBgn0002023	Lim3	Lim3	35	30	43	37	15	25	23	41	40	16	27	18	36	33	24	14	8	42	17	14	22	14	19	23	9	11	17
FBgn0002031_l(2)37Cc	FBgn0002031	lethal (2) 37Cc	l(2)37Cc	945	677	804	538	197	393	494	384	322	254	229	380	592	498	393	244	231	431	430	246	328	245	246	338	326	359	366
FBgn0002036_CG10561	FBgn0002036	0	CG10561	41	28	43	38	16	29	61	39	32	27	17	29	44	33	30	39	24	46	58	27	41	21	20	32	39	37	27
FBgn0002044_swm	FBgn0002044	second mitotic wave missing	swm	169	150	145	191	83	154	127	163	130	105	109	153	237	198	171	81	76	176	192	73	126	63	107	116	93	106	133
FBgn0002069_AspRS	FBgn0002069	Aspartyl-tRNA synthetase	AspRS	1518	1167	1237	779	313	531	698	583	437	396	340	595	786	734	658	347	338	555	571	271	468	343	383	552	377	424	460
FBgn0002121_l(2)gl	FBgn0002121	lethal (2) giant larvae	l(2)gl	649	488	763	852	325	623	428	667	517	476	445	626	771	575	521	234	172	457	311	127	332	114	150	229	130	98	225
FBgn0002174_l(2)tid	FBgn0002174	lethal (2) tumorous imaginal discs	l(2)tid	1305	824	975	583	235	472	590	443	356	272	272	417	573	500	514	263	257	467	735	307	391	281	257	382	503	368	284
FBgn0002183_dre4	FBgn0002183	dre4	dre4	99	71	81	56	28	37	26	51	55	41	41	59	87	68	54	19	16	55	65	20	35	23	30	27	26	27	31
FBgn0002283_l(3)73Ah	FBgn0002283	lethal (3) 73Ah	l(3)73Ah	39	41	54	52	23	38	57	43	33	20	25	39	53	40	31	25	25	26	62	31	36	25	30	32	39	32	19
FBgn0002284_Prosbeta6	FBgn0002284	Proteasome beta6 subunit	Prosbeta6	1176	818	1083	1123	499	839	865	879	622	540	517	791	1067	850	829	475	374	824	571	358	629	358	356	730	399	449	759
FBgn0002306_sas	FBgn0002306	stranded at second	sas	22	15	18	21	11	16	5	11	14	5	11	17	16	13	24	6	10	15	3	3	13	9	4	5	8	4	6
FBgn0002354_l(3)87Df	FBgn0002354	lethal (3) 87Df	l(3)87Df	154	103	128	146	37	84	131	90	58	51	51	65	115	80	71	44	52	76	87	51	57	54	49	71	101	88	76
FBgn0002413_dco	FBgn0002413	discs overgrown	dco	597	413	501	499	189	323	199	427	296	254	228	276	430	372	336	189	160	270	312	176	283	165	171	259	147	168	193
FBgn0002431_hyd	FBgn0002431	hyperplastic discs	hyd	70	65	75	28	14	60	22	30	57	29	29	53	55	49	56	15	14	50	22	8	38	12	11	10	8	12	17
FBgn0002440_l(3)mbn	FBgn0002440	lethal (3) malignant blood neoplasm	l(3)mbn	1	0	0	0	0	0	0	0	0	0	0	0	0	0	0	0	0	0	0	0	0	0	1	0	0	0	0
FBgn0002441_l(3)mbt	FBgn0002441	lethal (3) malignant brain tumor	l(3)mbt	145	90	100	84	41	68	34	64	78	44	47	61	71	50	48	49	19	77	58	37	80	22	23	64	20	24	40
FBgn0002466_sti	FBgn0002466	sticky	sti	5	1	0	0	1	3	2	3	2	2	0	2	2	0	4	0	1	1	3	2	1	0	0	0	3	1	0
FBgn0002521_pho	FBgn0002521	pleiohomeotic	pho	93	64	94	159	51	79	59	96	81	53	46	78	57	36	59	68	60	68	49	53	74	57	43	73	51	68	32
FBgn0002522_lab	FBgn0002522	labial	lab	36	18	25	26	9	15	11	18	20	13	12	16	17	22	27	9	6	15	15	7	8	5	8	9	6	3	12
FBgn0002524_lace	FBgn0002524	lace	lace	650	574	1127	715	233	499	479	572	368	340	298	444	589	490	397	264	176	387	445	236	336	211	258	305	269	274	276
FBgn0002525_Lam	FBgn0002525	Lamin	Lam	175	157	141	131	34	49	73	92	59	59	57	75	116	91	87	36	39	66	98	41	62	36	46	66	60	88	80
FBgn0002526_LanA	FBgn0002526	Laminin A	LanA	157	118	164	103	46	116	71	53	115	75	57	81	100	128	85	28	17	93	12	25	44	22	30	15	20	25	25
FBgn0002531_Lcp1	FBgn0002531	Larval cuticle protein 1	Lcp1	19	13	17	29	11	13	5	6	5	1	2	2	0	1	0	11	4	11	6	5	5	1	0	0	0	0	0
FBgn0002533_Lcp2	FBgn0002533	Larval cuticle protein 2	Lcp2	0	0	0	1	0	0	0	0	0	0	0	0	0	1	0	0	0	0	0	0	0	0	0	0	0	0	0
FBgn0002534_Lcp3	FBgn0002534	Larval cuticle protein 3	Lcp3	0	0	1	0	0	0	0	0	1	0	0	0	0	0	0	1	0	0	0	0	0	0	0	0	0	0	0
FBgn0002535_Lcp4	FBgn0002535	Larval cuticle protein 4	Lcp4	0	0	0	0	0	0	0	0	0	0	0	0	0	0	0	0	0	0	0	0	0	0	0	0	0	0	0
FBgn0002542_lds	FBgn0002542	lodestar	lds	30	29	24	19	14	13	12	16	17	8	7	12	14	9	5	4	6	9	9	12	12	7	4	10	10	0	5
FBgn0002543_robo2	FBgn0002543	roundabout 2	robo2	3	2	3	5	1	2	1	1	4	1	2	1	1	0	1	2	1	1	0	0	2	1	0	1	1	0	0
FBgn0002552_lin	FBgn0002552	lines	lin	106	76	102	74	29	54	53	83	55	51	48	67	110	61	93	43	34	70	43	47	65	27	27	60	33	43	54
FBgn0002561_l(1)sc	FBgn0002561	lethal of scute	l(1)sc	0	0	0	0	0	0	0	0	0	0	0	0	0	0	0	0	0	0	0	0	0	0	0	0	0	0	0
FBgn0002562_Lsp1alpha	FBgn0002562	Larval serum protein 1 alpha	Lsp1alpha	112	45	31	114	15	5	11	3	0	1	0	0	0	0	0	51	18	6	0	2	0	0	9	0	0	0	0
FBgn0002563_Lsp1beta	FBgn0002563	Larval serum protein 1 beta	Lsp1beta	551	228	269	399	58	51	89	5	1	3	2	1	1	2	1	128	95	53	5	8	4	1	65	0	9	19	0
FBgn0002564_Lsp1gamma	FBgn0002564	Larval serum protein 1 gamma	Lsp1gamma	378	363	459	156	39	169	95	96	112	23	20	37	20	10	20	62	52	149	61	53	43	8	22	11	3	1	17
FBgn0002565_Lsp2	FBgn0002565	Larval serum protein 2	Lsp2	122	52	77	88	8	16	12	1	0	2	0	0	0	1	0	35	15	9	2	1	0	2	5	1	5	2	0
FBgn0002566_lt	FBgn0002566	light	lt	188	156	180	187	73	128	109	171	136	93	107	128	173	160	140	65	82	128	123	60	121	64	70	108	61	66	108
FBgn0002567_Rab32	FBgn0002567	Rab32	Rab32	135	100	140	124	32	88	82	101	128	81	62	157	166	104	164	43	27	78	113	54	121	50	53	88	55	41	84
FBgn0002569_Mal-A2	FBgn0002569	Maltase A2	Mal-A2	1114	834	1616	1714	594	948	1037	856	552	481	459	595	747	474	480	913	863	1047	802	557	687	685	717	1062	1176	980	627
FBgn0002570_Mal-A1	FBgn0002570	Maltase A1	Mal-A1	26701	21686	33352	23510	9729	17323	11740	17076	10030	9825	9237	8968	15028	9738	9713	12400	13706	22495	13402	8027	12139	7428	9514	14595	11899	15596	9739
FBgn0002571_Mal-A3	FBgn0002571	Maltase A3	Mal-A3	948	672	1096	2493	1013	1464	1141	1279	747	461	527	572	867	568	674	1640	1409	1900	2304	1058	1236	878	954	2044	2601	1751	1486
FBgn0002573_sens	FBgn0002573	senseless	sens	0	0	0	1	0	0	0	1	0	0	0	1	0	0	0	0	0	0	0	0	0	0	0	0	0	0	0
FBgn0002576_lz	FBgn0002576	lozenge	lz	0	0	0	0	0	0	0	0	0	0	0	0	0	0	0	0	0	0	0	0	0	0	0	0	0	0	0
FBgn0002577_m	FBgn0002577	miniature	m	0	0	0	3	0	2	0	1	0	0	0	0	0	1	0	0	4	1	0	0	1	0	0	0	0	1	0
FBgn0002578_Kaz-m1	FBgn0002578	Kazal-type protease inhibitor m1	Kaz-m1	493	516	614	2582	1175	1443	2533	2240	1739	1328	1429	1906	2896	2358	1959	1467	1118	1603	2047	2208	2098	1917	1791	2656	2254	2282	2315
FBgn0002579_RpL36	FBgn0002579	Ribosomal protein L36	RpL36	10803	8581	11348	17518	5688	7949	22201	12119	8134	7378	7498	9883	15100	12965	12932	7764	6877	8617	9917	9400	8466	8862	8791	10041	23433	12568	7105
FBgn0002590_RpS5a	FBgn0002590	Ribosomal protein S5a	RpS5a	4817	3462	4833	7009	2095	3616	9956	4889	3933	3089	3243	5114	8099	6282	6764	2647	2492	3907	5020	2671	3586	2510	3084	3623	5004	3821	3371
FBgn0002592_E(spl)m2-BFM	FBgn0002592	Enhancer of split m2, Bearded family member	E(spl)m2-BFM	0	0	0	0	0	0	1	0	0	0	0	0	0	0	0	0	0	1	0	0	0	0	0	0	0	0	0
FBgn0002593_RpLP1	FBgn0002593	Ribosomal protein LP1	RpLP1	34703	23784	30611	44095	17273	26632	54698	41857	28923	25885	26670	37016	63214	46923	49778	21265	18302	26617	37680	26072	32317	24296	23689	33999	46454	30559	25074
FBgn0002607_RpL19	FBgn0002607	Ribosomal protein L19	RpL19	11167	7489	10502	14993	5516	8413	15815	11829	8632	7224	7453	10174	15307	11883	13404	7270	6278	8933	9702	7589	9078	6796	6956	9134	9792	8798	7808
FBgn0002609_E(spl)m3-HLH	FBgn0002609	Enhancer of split m3, helix-loop-helix	E(spl)m3-HLH	1	4	4	25	7	11	33	24	32	29	32	34	77	41	36	8	6	8	27	21	12	24	20	28	40	44	30
FBgn0002622_RpS3	FBgn0002622	Ribosomal protein S3	RpS3	6871	4701	6513	10122	3187	5271	18894	7006	5349	4337	4429	6459	12294	10030	9972	4010	3512	5209	9279	4505	5277	4310	4603	5294	10039	7015	5160
FBgn0002626_RpL32	FBgn0002626	Ribosomal protein L32	RpL32	11687	8186	11686	14060	5020	8058	14342	11873	8785	7424	8016	10286	14595	12239	12003	6423	5588	8603	6982	7529	8682	6667	7234	8677	10307	8356	7177
FBgn0002629_E(spl)m4-BFM	FBgn0002629	Enhancer of split m4, Bearded family member	E(spl)m4-BFM	0	0	0	0	0	0	0	0	0	0	0	0	0	1	0	0	0	0	0	0	0	0	0	0	0	0	0
FBgn0002631_E(spl)m5-HLH	FBgn0002631	Enhancer of split m5, helix-loop-helix	E(spl)m5-HLH	0	0	1	0	0	0	0	1	0	0	0	0	0	0	0	0	0	0	0	0	0	0	0	0	0	0	0
FBgn0002632_E(spl)m6-BFM	FBgn0002632	Enhancer of split m6, Bearded family member	E(spl)m6-BFM	0	1	0	4	3	0	1	1	3	2	0	1	4	0	1	4	1	1	3	5	16	10	3	5	2	14	12
FBgn0002633_E(spl)m7-HLH	FBgn0002633	Enhancer of split m7, helix-loop-helix	E(spl)m7-HLH	0	0	0	0	0	1	0	1	0	0	0	0	0	0	0	0	0	0	1	0	0	0	0	0	0	0	0
FBgn0002638_Rcc1	FBgn0002638	Regulator of chromosome condensation 1 ortholog (H. sapiens)	Rcc1	182	142	141	40	25	40	27	47	33	25	22	40	50	54	35	25	12	51	32	23	31	19	30	25	20	22	20
FBgn0002641_mal	FBgn0002641	maroon-like	mal	194	146	152	117	40	79	63	71	55	39	27	61	79	51	55	64	45	62	33	43	63	66	56	69	80	87	45
FBgn0002643_mam	FBgn0002643	mastermind	mam	88	79	84	80	49	65	43	70	78	46	54	66	86	82	71	34	24	68	43	36	56	28	32	47	20	20	33
FBgn0002645_Map205	FBgn0002645	Microtubule-associated protein 205	Map205	627	525	645	800	300	690	249	678	490	446	465	474	426	407	355	200	197	544	152	220	378	177	245	266	160	127	218
FBgn0002673_twe	FBgn0002673	twine	twe	0	0	0	1	0	0	0	0	0	0	1	0	0	1	1	0	0	0	0	0	0	0	1	0	0	0	0
FBgn0002707_mei-9	FBgn0002707	meiotic 9	mei-9	5	8	13	8	4	10	12	5	4	3	2	8	10	7	8	2	4	9	11	4	1	3	1	7	3	9	6
FBgn0002709_mei-218	FBgn0002709	meiotic 218	mei-218	4	0	2	3	0	2	3	4	0	2	1	1	4	4	0	1	1	1	2	0	3	2	1	1	1	0	1
FBgn0002715_mei-S332	FBgn0002715	meiotic from via Salaria 332	mei-S332	3	9	7	3	2	4	4	4	4	5	4	8	4	3	6	2	3	5	5	3	4	4	0	4	2	4	3
FBgn0002716_mei-W68	FBgn0002716	meiotic W68	mei-W68	0	2	2	0	1	2	1	1	0	1	1	0	0	0	2	1	0	1	3	3	3	3	1	0	1	1	2
FBgn0002719_Men	FBgn0002719	Malic enzyme	Men	2207	1570	2490	1923	568	1076	891	728	671	341	345	704	1020	868	693	1144	857	1134	2261	565	935	512	549	991	845	987	1409
FBgn0002723_Met	FBgn0002723	Methoprene-tolerant	Met	154	94	145	230	108	165	103	183	159	99	124	192	229	172	145	100	88	166	231	113	155	86	112	157	109	115	85
FBgn0002732_E(spl)malpha-BFM	FBgn0002732	Enhancer of split malpha, Bearded family member	E(spl)malpha-BFM	2	6	3	15	1	11	32	11	9	11	10	24	46	25	17	5	3	5	12	4	7	6	5	8	5	10	11
FBgn0002733_E(spl)mbeta-HLH	FBgn0002733	Enhancer of split mbeta, helix-loop-helix	E(spl)mbeta-HLH	10	14	8	36	15	18	32	34	29	30	21	42	46	50	48	6	12	22	19	25	22	23	25	23	27	23	36
FBgn0002734_E(spl)mdelta-HLH	FBgn0002734	Enhancer of split mdelta, helix-loop-helix	E(spl)mdelta-HLH	0	0	0	0	0	0	0	0	0	0	0	0	0	0	0	0	0	0	0	0	0	0	0	0	0	0	0
FBgn0002735_E(spl)mgamma-HLH	FBgn0002735	Enhancer of split mgamma, helix-loop-helix	E(spl)mgamma-HLH	0	0	0	3	0	1	2	4	0	0	0	2	3	4	1	0	0	0	1	0	1	0	2	0	0	2	0
FBgn0002736_mago	FBgn0002736	mago nashi	mago	168	123	122	126	47	68	133	71	54	40	39	81	102	77	72	57	52	77	84	52	61	58	51	73	90	93	52
FBgn0002772_Mlc1	FBgn0002772	Myosin alkali light chain 1	Mlc1	368	543	653	442	147	356	309	160	292	82	115	137	214	239	218	196	162	382	201	119	148	109	102	89	101	61	128
FBgn0002773_Mlc2	FBgn0002773	Myosin light chain 2	Mlc2	6431	4035	4556	3704	1303	2374	2808	1285	1413	533	677	1233	1546	1431	1585	1581	1658	2085	2521	929	1304	828	831	1253	1782	1603	1558
FBgn0002774_mle	FBgn0002774	maleless	mle	199	112	154	162	67	136	110	137	123	114	105	166	222	180	176	82	63	143	221	88	115	60	67	94	88	67	103
FBgn0002775_msl-3	FBgn0002775	male-specific lethal 3	msl-3	26	19	23	18	17	22	24	27	14	22	19	20	22	20	16	15	14	19	16	11	22	10	11	16	12	11	13
FBgn0002778_mnd	FBgn0002778	minidiscs	mnd	34	37	32	16	10	8	16	21	20	19	21	19	18	21	30	9	5	14	12	1	9	4	8	17	10	8	11
FBgn0002780_mod	FBgn0002780	modulo	mod	565	592	591	180	72	239	242	224	303	229	168	288	387	344	309	60	44	232	77	70	164	43	72	48	53	40	105
FBgn0002781_mod(mdg4)	FBgn0002781	modifier of mdg4	mod(mdg4)	48	48	36	53	28	32	40	41	52	34	28	41	49	46	44	22	25	30	23	21	35	21	22	24	24	18	16
FBgn0002783_mor	FBgn0002783	moira	mor	99	80	94	91	30	57	58	88	50	64	42	55	104	91	67	37	30	74	64	40	49	34	43	66	42	40	40
FBgn0002787_Rpn8	FBgn0002787	Regulatory particle non-ATPase 8	Rpn8	280	272	360	335	124	226	238	261	196	154	129	244	382	293	270	141	124	180	424	129	189	128	163	200	216	198	202
FBgn0002789_Mp20	FBgn0002789	Muscle protein 20	Mp20	1074	738	855	682	258	408	761	238	275	141	182	284	389	410	393	293	268	349	434	224	243	206	188	236	423	337	347
FBgn0002791_mr	FBgn0002791	morula	mr	56	24	35	28	16	30	33	28	30	28	29	31	68	39	52	13	11	22	32	15	23	11	9	17	17	22	28
FBgn0002838_ms(3)K81	FBgn0002838	male sterile (3) K81	ms(3)K81	0	0	0	0	0	0	0	0	0	0	0	0	0	0	0	0	0	0	0	0	0	0	0	0	0	0	0
FBgn0002842_sa	FBgn0002842	spermatocyte arrest	sa	0	0	0	0	0	0	0	0	0	0	0	0	0	0	0	0	0	0	0	0	0	0	0	0	0	0	0
FBgn0002855_Acp26Aa	FBgn0002855	Accessory gland protein 26Aa	Acp26Aa	0	0	0	0	0	0	0	0	0	0	0	1	0	0	0	0	0	1	0	0	0	0	0	0	0	0	0
FBgn0002856_Acp26Ab	FBgn0002856	Accessory gland protein 26Ab	Acp26Ab	0	0	0	0	0	0	0	1	0	0	0	0	0	0	0	0	0	0	0	0	0	0	0	0	0	0	0
FBgn0002862_Mst87F	FBgn0002862	Male-specific RNA 87F	Mst87F	0	0	0	0	0	0	0	0	0	0	0	0	0	0	0	0	0	0	0	0	0	0	0	0	0	0	0
FBgn0002863_Acp95EF	FBgn0002863	Accessory gland protein 95EF	Acp95EF	0	0	0	0	0	0	0	0	0	0	0	0	1	0	0	0	0	0	0	0	0	0	0	0	1	0	0
FBgn0002865_Mst98Ca	FBgn0002865	Male-specific RNA 98Ca	Mst98Ca	0	0	0	0	0	0	0	0	0	0	0	0	0	0	0	0	0	0	0	0	0	0	0	0	0	0	0
FBgn0002868_MtnA	FBgn0002868	Metallothionein A	MtnA	54898	35760	50534	62342	16439	21763	78581	28236	17181	15416	16025	16716	49710	39245	31131	19206	17883	19694	41317	17911	16957	10389	12348	8510	24113	13932	5761
FBgn0002869_MtnB	FBgn0002869	Metallothionein B	MtnB	1245	665	698	1299	350	520	1193	317	409	160	167	307	322	274	485	2005	1230	2550	5561	1508	2054	884	962	1488	3778	2409	1022
FBgn0002872_mu2	FBgn0002872	mutator 2	mu2	15	10	7	2	1	1	0	3	2	4	3	2	4	3	4	3	0	7	0	0	2	2	2	0	1	2	3
FBgn0002873_mud	FBgn0002873	mushroom body defect	mud	17	18	10	10	3	16	2	11	17	8	7	16	7	7	7	2	0	5	2	1	3	1	1	2	3	2	0
FBgn0002878_mus101	FBgn0002878	mutagen-sensitive 101	mus101	10	6	7	2	1	2	3	4	4	0	1	5	5	4	1	1	5	4	0	3	4	0	1	3	1	1	0
FBgn0002887_mus201	FBgn0002887	mutagen-sensitive 201	mus201	21	15	28	20	9	18	1	21	16	20	19	11	16	18	12	7	4	21	4	5	16	6	8	7	8	2	6
FBgn0002891_mus205	FBgn0002891	mutagen-sensitive 205	mus205	30	23	19	11	7	20	12	19	18	16	13	27	32	20	31	12	6	24	18	9	16	3	6	13	11	9	15
FBgn0002899_mus301	FBgn0002899	mutagen-sensitive 301	mus301	11	10	12	3	1	2	2	1	3	4	1	3	2	2	2	5	1	1	1	0	1	0	2	1	1	1	1
FBgn0002901_mus304	FBgn0002901	mutagen-sensitive 304	mus304	24	24	18	14	6	10	11	13	7	9	9	16	21	15	18	4	6	8	22	4	6	5	8	10	10	4	9
FBgn0002905_mus308	FBgn0002905	mutagen-sensitive 308	mus308	7	9	7	6	2	8	5	2	9	1	2	7	3	4	13	5	1	5	4	2	5	0	1	2	3	2	3
FBgn0002906_Blm	FBgn0002906	Bloom syndrome helicase ortholog	Blm	31	28	19	10	1	7	4	6	10	6	3	4	15	7	8	0	6	6	1	3	1	5	3	2	2	1	1
FBgn0002909_mus312	FBgn0002909	mutagen-sensitive 312	mus312	0	0	0	0	0	0	0	0	0	0	0	0	0	0	0	0	0	0	0	0	0	0	0	0	0	0	0
FBgn0002914_Myb	FBgn0002914	Myb oncogene-like	Myb	76	77	85	69	23	61	42	90	92	78	58	94	100	76	77	27	21	61	51	38	51	22	25	47	17	31	42
FBgn0002917_na	FBgn0002917	narrow abdomen	na	4	1	1	2	1	1	0	0	0	3	2	0	0	0	0	1	0	0	0	2	0	0	1	1	0	0	0
FBgn0002921_Atpalpha	FBgn0002921	Na pump alpha subunit	Atpalpha	419	397	473	368	141	374	297	276	354	267	218	302	678	613	480	180	119	464	271	115	269	94	136	110	150	129	287
FBgn0002922_nau	FBgn0002922	nautilus	nau	0	0	0	0	0	0	0	0	0	0	0	0	2	0	1	0	0	0	0	0	0	1	0	0	1	0	0
FBgn0002924_ncd	FBgn0002924	non-claret disjunctional	ncd	13	7	6	5	5	5	3	5	4	2	4	11	7	2	4	2	2	6	8	2	4	3	1	1	4	0	3
FBgn0002926_ndl	FBgn0002926	nudel	ndl	0	0	0	0	0	0	0	0	0	0	0	0	0	1	0	0	0	0	0	0	0	0	0	0	0	0	0
FBgn0002930_nec	FBgn0002930	necrotic	nec	20	19	23	18	5	14	17	11	6	8	6	4	12	10	9	14	7	9	4	10	3	4	4	2	4	8	8
FBgn0002931_net	FBgn0002931	net	net	0	3	3	6	0	0	1	9	3	2	3	4	3	5	2	4	2	1	0	0	1	0	1	0	0	2	1
FBgn0002932_neur	FBgn0002932	neuralized	neur	62	66	64	68	27	54	67	62	59	56	40	76	79	78	73	26	27	46	68	27	37	24	24	34	26	26	32
FBgn0002933_ng1	FBgn0002933	new glue 1	ng1	0	0	1	0	0	0	0	0	0	0	0	0	0	0	0	0	0	0	0	0	0	0	0	0	0	0	0
FBgn0002936_ninaA	FBgn0002936	neither inactivation nor afterpotential A	ninaA	0	3	1	0	0	1	0	0	0	0	0	2	0	0	1	0	0	0	0	0	1	0	0	1	0	0	0
FBgn0002937_ninaB	FBgn0002937	neither inactivation nor afterpotential B	ninaB	0	0	0	0	0	0	0	1	0	0	0	0	0	0	0	0	0	0	0	0	0	0	0	0	0	0	0
FBgn0002938_ninaC	FBgn0002938	neither inactivation nor afterpotential C	ninaC	0	0	1	0	0	0	0	0	0	0	0	0	1	0	0	0	0	0	0	0	0	0	0	0	0	0	0
FBgn0002939_ninaD	FBgn0002939	neither inactivation nor afterpotential D	ninaD	187	311	431	967	407	1020	435	553	539	211	266	305	342	267	220	878	907	1764	1119	950	977	346	524	653	457	189	382
FBgn0002940_ninaE	FBgn0002940	neither inactivation nor afterpotential E	ninaE	0	0	1	0	0	0	4	0	0	0	0	0	0	0	0	1	0	1	4	0	0	0	1	0	3	1	0
FBgn0002941_slou	FBgn0002941	slouch	slou	0	0	0	0	0	0	0	0	0	0	0	0	0	0	0	0	0	0	0	0	0	0	0	0	0	0	0
FBgn0002945_nkd	FBgn0002945	naked cuticle	nkd	47	48	60	42	18	39	14	33	36	29	30	49	39	28	36	8	11	47	6	13	38	9	12	20	6	2	14
FBgn0002948_nod	FBgn0002948	no distributive disjunction	nod	1	2	0	1	1	1	0	0	2	0	1	2	1	2	1	0	2	2	3	3	0	1	1	0	2	0	0
FBgn0002962_nos	FBgn0002962	nanos	nos	0	0	0	0	0	0	1	0	0	0	0	0	0	1	0	0	0	0	1	0	0	0	0	0	7	3	0
FBgn0002973_numb	FBgn0002973	numb	numb	100	93	143	145	40	93	66	90	67	57	53	80	74	73	75	55	25	88	73	45	51	32	47	40	29	21	37
FBgn0002985_odd	FBgn0002985	odd skipped	odd	55	45	69	128	28	131	102	86	101	85	71	106	214	131	103	54	61	128	61	43	134	60	45	56	69	65	159
FBgn0002989_okr	FBgn0002989	okra	okr	3	10	1	3	1	11	3	2	5	5	5	6	9	5	3	0	1	3	6	2	3	3	3	3	0	3	4
FBgn0003002_opa	FBgn0003002	odd paired	opa	4	5	8	1	0	1	3	1	1	1	0	1	0	0	0	0	0	1	1	0	0	0	1	1	2	0	1
FBgn0003008_or	FBgn0003008	orange	or	42	40	45	64	22	41	56	44	31	23	21	35	54	59	31	26	19	30	41	21	34	20	27	50	48	30	49
FBgn0003009_ord	FBgn0003009	orientation disruptor	ord	0	0	0	0	0	0	0	0	0	0	0	0	0	0	0	0	0	0	0	0	0	1	0	0	0	0	0
FBgn0003011_ort	FBgn0003011	ora transientless	ort	0	0	0	0	0	0	0	0	0	0	0	0	0	0	0	0	0	0	0	0	0	0	0	0	0	0	0
FBgn0003015_osk	FBgn0003015	oskar	osk	0	0	0	0	0	0	0	0	1	0	1	0	0	0	0	0	0	0	2	0	0	0	2	0	2	3	0
FBgn0003016_osp	FBgn0003016	outspread	osp	41	48	44	67	17	37	62	49	38	33	24	36	106	101	72	18	19	47	29	11	43	19	20	25	27	22	41
FBgn0003023_otu	FBgn0003023	ovarian tumor	otu	1	0	2	0	0	1	0	0	0	1	0	0	1	0	2	0	1	1	0	1	2	0	0	0	2	0	0
FBgn0003028_ovo	FBgn0003028	ovo	ovo	10	4	4	2	2	1	2	2	2	1	0	1	2	1	5	1	2	5	1	1	5	1	3	0	4	1	0
FBgn0003034_SP	FBgn0003034	Sex Peptide	SP	0	0	0	0	0	0	0	0	0	0	0	0	0	0	0	0	0	0	0	0	0	0	0	0	0	0	0
FBgn0003041_pbl	FBgn0003041	pebble	pbl	58	54	56	16	10	21	5	24	20	13	14	22	20	15	19	13	10	22	7	7	14	7	6	16	6	3	7
FBgn0003042_Pc	FBgn0003042	Polycomb	Pc	13	24	14	31	9	15	33	15	17	13	15	23	17	18	15	11	12	13	13	11	14	7	10	8	18	12	7
FBgn0003044_Pcl	FBgn0003044	Polycomblike	Pcl	91	84	93	59	24	44	34	52	48	35	40	66	67	55	58	20	10	42	25	21	56	23	15	20	13	17	20
FBgn0003046_Pcp	FBgn0003046	Pupal cuticle protein	Pcp	0	0	0	1	0	0	1	0	0	0	0	0	0	1	0	1	0	0	0	0	0	0	0	0	0	0	0
FBgn0003048_pcx	FBgn0003048	pecanex	pcx	47	33	41	41	12	37	8	29	28	19	13	24	25	15	44	10	8	22	7	16	17	11	8	10	8	6	15
FBgn0003053_peb	FBgn0003053	pebbled	peb	1117	1148	1055	1073	487	800	689	870	775	626	605	832	1230	1041	899	460	328	753	584	356	676	349	355	449	441	441	582
FBgn0003057_CG10598	FBgn0003057	0	CG10598	0	0	0	0	0	0	0	0	0	0	0	0	0	0	0	0	0	0	0	0	0	0	0	0	0	0	0
FBgn0003060_CG9757	FBgn0003060	0	CG9757	2	0	0	0	0	0	2	0	0	0	0	0	0	0	0	0	0	0	0	0	1	0	0	0	0	0	0
FBgn0003062_Fib	FBgn0003062	Fibrillarin	Fib	920	638	593	389	110	227	635	387	343	237	220	285	501	395	397	134	57	181	313	180	224	193	197	171	284	265	141
FBgn0003065_CG2150	FBgn0003065	0	CG2150	0	0	0	1	0	0	0	0	0	0	0	0	0	0	0	0	0	0	0	0	0	0	0	0	0	0	0
FBgn0003067_Pepck	FBgn0003067	Phosphoenolpyruvate carboxykinase	Pepck	0	0	0	0	0	0	0	0	0	0	0	0	0	0	0	0	0	0	0	0	0	0	0	0	0	0	0
FBgn0003068_per	FBgn0003068	period	per	19	15	23	15	0	4	6	13	6	14	4	9	9	3	3	6	3	8	6	3	9	6	3	5	4	1	3
FBgn0003071_Pfk	FBgn0003071	Phosphofructokinase	Pfk	200	149	187	98	33	56	54	46	45	25	15	40	63	52	43	41	45	71	36	27	58	24	32	48	45	54	36
FBgn0003074_Pgi	FBgn0003074	Phosphoglucose isomerase	Pgi	4660	3221	3641	746	271	383	339	360	268	192	204	276	420	333	315	499	430	665	407	247	396	274	261	411	477	467	491
FBgn0003076_Pgm	FBgn0003076	phosphoglucose mutase	Pgm	210	140	197	137	45	65	78	62	41	23	52	28	71	41	50	75	65	83	62	45	52	48	56	54	51	79	73
FBgn0003079_Raf	FBgn0003079	Raf oncogene	Raf	44	25	25	28	13	30	32	26	30	19	16	26	44	22	35	17	16	18	35	8	17	13	10	25	7	17	24
FBgn0003082_phr	FBgn0003082	photorepair	phr	0	1	0	1	0	0	0	1	0	0	0	0	0	0	0	0	0	0	0	0	0	0	0	0	0	0	0
FBgn0003086_Pig1	FBgn0003086	Pre-intermoult gene 1	Pig1	0	0	0	0	0	0	0	0	0	0	0	0	0	0	0	0	0	0	0	0	0	0	0	0	0	0	0
FBgn0003087_pim	FBgn0003087	pimples	pim	0	0	2	2	2	0	2	2	0	2	1	1	0	2	0	1	2	1	0	2	0	1	1	0	8	0	1
FBgn0003089_pip	FBgn0003089	pipe	pip	0	0	0	1	0	1	0	1	0	0	0	0	0	0	0	0	0	1	0	1	2	0	0	0	0	0	0
FBgn0003090_pk	FBgn0003090	prickle	pk	10	8	9	15	10	14	18	10	13	11	2	19	15	11	16	8	11	11	13	9	16	18	7	16	10	10	8
FBgn0003091_Pkc53E	FBgn0003091	Protein C kinase 53E	Pkc53E	34	21	32	12	5	11	9	17	13	5	11	6	12	14	12	4	6	3	8	7	9	2	3	2	6	0	1
FBgn0003093_Pkc98E	FBgn0003093	Protein C kinase 98E	Pkc98E	222	175	217	171	78	181	135	172	190	116	113	227	253	201	194	75	70	141	136	72	119	39	66	65	55	56	106
FBgn0003114_plu	FBgn0003114	plutonium	plu	0	0	0	0	0	0	0	0	0	0	1	0	0	0	0	0	0	0	1	1	0	0	0	1	13	2	0
FBgn0003116_pn	FBgn0003116	prune	pn	34	33	33	61	26	30	44	33	22	22	13	25	36	35	43	19	23	34	31	21	27	26	15	22	47	27	25
FBgn0003117_pnr	FBgn0003117	pannier	pnr	0	0	1	1	0	0	0	2	2	0	1	1	0	0	0	0	0	0	0	0	0	0	0	0	0	0	0
FBgn0003118_pnt	FBgn0003118	pointed	pnt	93	91	148	81	44	64	56	98	53	91	63	112	110	87	100	31	30	66	39	21	79	22	21	43	27	20	32
FBgn0003124_polo	FBgn0003124	polo	polo	3	0	1	10	5	6	9	3	1	2	4	8	4	5	2	3	2	7	4	2	4	2	3	3	2	0	1
FBgn0003129_Poxm	FBgn0003129	Pox meso	Poxm	3	2	2	1	0	2	0	1	3	0	0	1	0	2	5	2	0	5	3	0	3	0	0	1	0	0	1
FBgn0003130_Poxn	FBgn0003130	Pox neuro	Poxn	4	2	0	2	0	4	5	5	1	2	2	2	4	6	6	1	2	2	3	4	1	3	2	3	2	0	1
FBgn0003132_Pp1-13C	FBgn0003132	Protein phosphatase 1 at 13C	Pp1-13C	0	0	0	0	0	0	0	0	0	0	0	0	0	0	0	0	0	0	0	0	0	0	0	0	0	0	1
FBgn0003134_Pp1alpha-96A	FBgn0003134	Protein phosphatase 1alpha at 96A	Pp1alpha-96A	334	226	289	244	107	209	136	215	197	164	181	237	267	241	235	115	121	195	146	102	200	80	82	179	68	99	110
FBgn0003137_Ppn	FBgn0003137	Papilin	Ppn	66	58	122	73	29	80	44	47	66	17	26	65	26	28	35	14	21	41	18	12	33	5	10	7	10	6	17
FBgn0003139_PpV	FBgn0003139	Protein phosphatase V	PpV	49	46	52	77	16	35	69	50	27	36	29	44	80	49	55	33	21	48	65	34	51	31	33	37	54	51	36
FBgn0003140_PpY-55A	FBgn0003140	Protein phosphatase Y at 55A	PpY-55A	0	0	0	0	0	0	0	0	0	0	0	0	0	0	0	0	0	0	0	0	0	0	0	0	0	0	0
FBgn0003141_pr	FBgn0003141	purple	pr	102	68	112	45	30	67	58	54	51	48	45	72	133	114	100	31	24	80	67	14	49	21	26	23	34	32	87
FBgn0003145_prd	FBgn0003145	paired	prd	0	0	0	0	0	0	0	0	0	0	0	0	0	0	0	0	0	0	0	0	0	0	0	0	0	0	0
FBgn0003149_Prm	FBgn0003149	Paramyosin	Prm	970	902	1170	527	227	595	275	252	371	88	103	325	212	197	283	204	208	463	250	113	244	72	77	140	115	70	199
FBgn0003159_CG2841	FBgn0003159	0	CG2841	170	214	281	187	72	220	147	148	233	142	120	193	231	264	207	54	53	213	67	53	149	39	61	61	47	40	103
FBgn0003162_Pu	FBgn0003162	Punch	Pu	414	566	376	27	11	26	30	17	18	12	12	27	17	23	20	10	13	21	34	11	20	9	12	16	8	14	14
FBgn0003165_pum	FBgn0003165	pumilio	pum	1070	887	1264	563	237	766	435	560	775	408	416	722	930	759	824	186	140	617	298	122	402	80	145	227	98	102	335
FBgn0003169_put	FBgn0003169	punt	put	57	84	122	76	41	61	57	68	69	44	45	74	90	49	55	46	39	70	55	25	68	21	44	53	32	23	29
FBgn0003174_pwn	FBgn0003174	pawn	pwn	1	2	0	1	1	1	0	0	0	0	0	0	0	0	1	0	1	0	0	1	0	0	0	0	1	1	0
FBgn0003175_px	FBgn0003175	plexus	px	223	182	212	259	108	245	135	167	208	138	153	254	349	249	274	125	80	241	138	93	194	82	86	120	65	83	123
FBgn0003187_qua	FBgn0003187	quail	qua	21	6	9	2	0	5	0	0	1	0	3	1	5	0	2	0	0	0	2	1	5	0	1	1	3	0	0
FBgn0003189_r	FBgn0003189	rudimentary	r	94	60	85	46	11	41	48	101	72	48	66	92	93	76	87	17	11	38	40	26	47	24	27	33	14	19	21
FBgn0003204_ras	FBgn0003204	raspberry	ras	484	333	353	350	134	188	299	287	254	173	168	209	314	212	242	127	107	159	213	123	159	102	147	149	107	132	92
FBgn0003205_Ras85D	FBgn0003205	Ras oncogene at 85D	Ras85D	192	155	198	293	92	146	133	201	115	108	89	161	142	113	117	104	78	133	151	93	115	81	101	133	118	94	85
FBgn0003206_Ras64B	FBgn0003206	Ras oncogene at 64B	Ras64B	22	24	39	30	7	35	13	19	31	18	13	16	19	14	16	11	5	29	9	3	7	8	5	4	10	6	7
FBgn0003209_raw	FBgn0003209	raw	raw	98	88	98	158	71	118	61	142	101	81	91	122	121	126	111	33	32	60	30	26	38	30	54	36	13	24	37
FBgn0003210_rb	FBgn0003210	ruby	rb	146	118	145	152	49	91	68	123	76	59	76	89	134	133	163	68	60	91	86	51	78	50	63	62	64	53	75
FBgn0003218_rdgB	FBgn0003218	retinal degeneration B	rdgB	112	118	121	74	36	75	42	33	55	33	30	46	41	35	29	53	41	76	29	42	58	27	19	57	26	26	34
FBgn0003227_rec	FBgn0003227	recombination-defective	rec	2	1	3	0	1	1	1	2	0	4	0	1	1	0	0	0	2	2	6	2	2	1	1	0	1	0	1
FBgn0003231_ref(2)P	FBgn0003231	refractory to sigma P	ref(2)P	390	406	682	918	399	814	725	887	813	638	569	1108	1243	1094	1083	428	342	656	1128	424	630	373	430	653	407	537	666
FBgn0003248_Rh2	FBgn0003248	Rhodopsin 2	Rh2	0	0	0	0	0	0	0	0	0	0	0	0	1	0	0	0	0	0	1	0	0	0	0	0	0	0	0
FBgn0003249_Rh3	FBgn0003249	Rhodopsin 3	Rh3	0	0	0	0	0	0	0	0	0	0	0	0	0	0	0	0	0	0	0	0	0	0	0	0	0	0	0
FBgn0003250_Rh4	FBgn0003250	Rhodopsin 4	Rh4	0	0	0	0	0	0	0	0	0	0	0	0	0	0	0	0	0	0	0	0	0	0	0	0	0	1	0
FBgn0003254_rib	FBgn0003254	ribbon	rib	0	0	1	2	1	1	2	4	0	0	1	0	2	2	0	0	0	1	1	0	0	2	0	1	0	0	0
FBgn0003255_rk	FBgn0003255	rickets	rk	2	2	0	3	1	1	2	1	3	0	0	2	0	0	0	0	2	0	0	1	0	1	0	0	1	0	0
FBgn0003256_rl	FBgn0003256	rolled	rl	102	70	97	155	54	77	76	130	85	106	83	71	67	64	68	69	53	108	54	70	84	57	71	75	47	52	38
FBgn0003257_r-l	FBgn0003257	rudimentary-like	r-l	56	43	25	39	12	26	42	42	37	27	22	34	76	45	55	11	11	19	62	14	23	15	20	15	23	12	11
FBgn0003261_Rm62	FBgn0003261	Rm62	Rm62	832	730	812	842	354	608	938	982	764	608	584	811	1170	972	946	343	224	562	701	329	525	256	381	383	287	362	380
FBgn0003267_ro	FBgn0003267	rough	ro	0	0	0	0	0	0	0	0	0	0	0	0	0	0	0	0	0	0	0	0	0	0	0	0	0	0	0
FBgn0003268_rod	FBgn0003268	rough deal	rod	14	19	8	24	15	9	18	16	15	13	8	10	21	21	16	5	4	16	12	4	5	5	5	8	7	11	11
FBgn0003270_amos	FBgn0003270	absent MD neurons and olfactory sensilla	amos	0	0	0	0	1	0	0	0	0	0	0	0	0	0	0	0	0	0	0	0	0	0	0	0	0	0	0
FBgn0003274_RpLP2	FBgn0003274	Ribosomal protein LP2	RpLP2	23685	14768	22060	37291	10740	17018	43322	25496	16281	13362	15386	23499	29134	23291	30391	15555	13291	16429	18357	17626	17120	17123	19616	21016	53666	21545	13253
FBgn0003275_RpII18	FBgn0003275	RNA polymerase II 18kD subunit	RpII18	234	147	150	299	56	112	328	150	121	88	81	111	173	143	150	99	75	95	128	87	77	108	87	82	311	147	72
FBgn0003277_RpII215	FBgn0003277	RNA polymerase II 215kD subunit	RpII215	145	106	145	106	58	97	61	105	91	81	68	92	115	92	99	45	37	104	53	29	76	31	52	42	29	23	46
FBgn0003278_RpI135	FBgn0003278	RNA polymerase I 135kD subunit	RpI135	83	69	63	38	9	33	25	64	63	31	36	42	63	69	50	12	10	20	23	15	30	9	11	15	8	23	25
FBgn0003279_RpL4	FBgn0003279	Ribosomal protein L4	RpL4	4906	4155	5609	4799	1899	3701	4681	4797	4078	3295	2950	4233	7584	6386	6167	2519	2156	4308	3271	2883	3849	2231	2618	3297	2419	3395	3358
FBgn0003285_rst	FBgn0003285	roughest	rst	2	2	2	2	1	3	1	2	0	4	1	4	2	6	7	0	3	5	0	0	2	0	3	2	1	0	2
FBgn0003292_rt	FBgn0003292	rotated abdomen	rt	1	0	1	1	0	0	0	0	0	0	0	0	0	0	0	0	0	0	0	1	0	1	0	0	1	0	0
FBgn0003295_ru	FBgn0003295	roughoid	ru	0	0	1	0	0	0	1	1	0	0	0	0	0	0	0	0	0	0	0	0	0	0	0	0	0	0	0
FBgn0003300_run	FBgn0003300	runt	run	0	1	1	0	0	0	0	0	0	0	0	0	0	0	0	2	0	0	0	0	0	0	0	0	0	0	0
FBgn0003301_rut	FBgn0003301	rutabaga	rut	159	124	147	160	66	133	48	89	70	45	59	80	79	76	76	84	75	140	50	40	105	59	56	74	36	34	46
FBgn0003302_rux	FBgn0003302	roughex	rux	18	10	13	20	7	12	13	10	12	6	0	12	18	11	11	4	9	11	14	7	5	4	8	14	11	11	6
FBgn0003308_ry	FBgn0003308	rosy	ry	141	116	141	111	25	42	45	49	44	27	24	39	58	39	45	49	27	43	49	32	51	48	39	57	27	51	43
FBgn0003310_S	FBgn0003310	Star	S	145	91	91	109	32	59	26	80	56	77	58	68	65	62	43	28	22	63	30	23	50	27	32	25	12	11	18
FBgn0003312_sad	FBgn0003312	shadow	sad	0	1	0	0	0	2	2	0	0	0	0	0	1	4	1	0	1	0	1	1	0	0	0	0	0	0	0
FBgn0003313_sala	FBgn0003313	spalt-adjacent	sala	0	0	0	0	0	0	0	0	0	0	0	0	0	0	0	0	0	0	0	0	0	0	0	0	0	0	0
FBgn0003317_sax	FBgn0003317	saxophone	sax	14	13	19	14	4	17	19	19	11	10	14	18	23	23	9	12	2	20	6	5	13	4	7	14	4	12	17
FBgn0003319_Sb	FBgn0003319	Stubble	Sb	2	0	2	4	0	1	0	0	1	0	0	4	0	1	0	1	0	5	0	0	0	0	0	1	0	0	0
FBgn0003321_sbr	FBgn0003321	small bristles	sbr	21	35	26	36	13	35	19	36	23	16	15	32	51	52	41	12	6	24	28	14	20	3	17	10	13	7	14
FBgn0003326_sca	FBgn0003326	scabrous	sca	2	0	0	2	0	1	0	2	0	0	0	1	1	0	0	0	0	0	0	1	0	0	0	1	0	0	0
FBgn0003328_scb	FBgn0003328	scab	scb	236	225	394	491	181	326	397	408	264	206	159	387	396	336	304	157	99	224	337	97	138	89	125	162	125	121	185
FBgn0003330_Sce	FBgn0003330	Sex combs extra	Sce	25	25	30	30	12	16	48	16	16	19	17	22	39	25	31	13	16	17	16	17	23	18	12	16	40	19	23
FBgn0003334_Scm	FBgn0003334	Sex comb on midleg	Scm	41	36	43	53	16	34	28	40	23	33	20	31	36	47	22	18	9	37	19	15	25	11	20	21	7	11	14
FBgn0003339_Scr	FBgn0003339	Sex combs reduced	Scr	0	0	0	1	0	0	0	0	0	0	1	0	0	0	2	0	0	0	0	1	0	0	0	0	0	0	0
FBgn0003345_sd	FBgn0003345	scalloped	sd	652	438	652	647	279	497	298	490	430	310	275	481	513	420	398	187	180	325	290	155	292	144	169	222	166	134	213
FBgn0003346_RanGAP	FBgn0003346	Ran GTPase activating protein	RanGAP	119	84	88	51	18	38	37	42	34	24	26	33	33	30	31	20	20	25	24	9	24	19	10	26	28	16	16
FBgn0003353_sei	FBgn0003353	seizure	sei	1	2	3	0	0	3	0	0	1	0	0	1	0	1	0	1	0	2	0	1	1	0	0	1	0	0	0
FBgn0003356_Jon99Cii	FBgn0003356	Jonah 99Cii	Jon99Cii	1071	2187	1832	17921	8891	8142	14606	16399	14572	8462	8791	10715	14880	14975	8072	14788	10034	14647	23782	26390	22316	18629	19939	22124	19108	31919	32472
FBgn0003357_Jon99Ciii	FBgn0003357	Jonah 99Ciii	Jon99Ciii	2348	5053	4238	77311	47259	26194	84978	67508	60770	31880	30295	31108	67284	69555	31606	80727	59809	58574	147972	207224	141671	113388	92567	95725	162041	286757	233770
FBgn0003358_Jon99Ci	FBgn0003358	Jonah 99Ci	Jon99Ci	654	773	786	24217	6557	6430	18499	7540	4441	2865	2729	3539	4927	3880	3205	15753	10773	11155	22320	12106	9215	12704	12262	15105	52020	27033	16767
FBgn0003360_sesB	FBgn0003360	stress-sensitive B	sesB	19271	12857	15462	11303	4050	8006	8021	6893	5574	4286	3885	6438	8125	6402	6480	6176	6021	9736	6671	5524	7338	5405	5025	7495	9152	5773	6511
FBgn0003366_sev	FBgn0003366	sevenless	sev	0	0	5	1	1	3	6	1	3	0	2	2	5	1	2	0	0	3	4	0	3	0	0	1	1	1	0
FBgn0003371_sgg	FBgn0003371	shaggy	sgg	321	255	292	339	154	245	165	240	227	161	192	199	234	236	250	142	113	218	91	154	230	108	109	182	75	118	182
FBgn0003372_Sgs1	FBgn0003372	Salivary gland secretion 1	Sgs1	0	0	0	0	0	1	0	0	0	0	0	0	0	0	0	2	0	0	0	1	0	0	0	0	0	0	1
FBgn0003373_Sgs3	FBgn0003373	Salivary gland secretion 3	Sgs3	0	0	0	0	0	0	1	0	1	0	0	0	0	0	0	0	0	0	0	0	0	0	0	0	0	0	0
FBgn0003374_Sgs4	FBgn0003374	Salivary gland secretion 4	Sgs4	0	0	0	0	0	0	0	0	0	0	0	0	0	0	0	0	0	0	0	0	0	0	0	0	0	0	0
FBgn0003375_Sgs5	FBgn0003375	Salivary gland secretion 5	Sgs5	0	2	0	0	0	1	5	0	2	0	1	7	2	1	4	1	2	0	4	1	0	2	2	4	3	4	2
FBgn0003377_Sgs7	FBgn0003377	Salivary gland secretion 7	Sgs7	0	3	1	0	2	1	0	2	2	1	1	1	2	1	1	0	0	2	0	0	0	0	0	1	0	0	0
FBgn0003378_Sgs8	FBgn0003378	Salivary gland secretion 8	Sgs8	0	0	0	0	0	0	0	0	0	0	0	0	0	0	0	0	0	0	0	0	0	0	0	0	0	0	0
FBgn0003380_Sh	FBgn0003380	Shaker	Sh	21	28	36	11	12	30	14	17	36	11	12	28	23	24	37	10	4	29	8	7	19	4	7	10	2	9	14
FBgn0003382_sha	FBgn0003382	shavenoid	sha	0	0	0	0	0	0	2	0	0	0	0	0	0	0	0	0	0	0	1	0	0	0	0	0	1	0	0
FBgn0003386_Shaw	FBgn0003386	Shaker cognate w	Shaw	48	56	74	27	9	34	14	19	19	10	8	25	22	14	19	12	8	22	3	4	16	10	3	2	3	2	6
FBgn0003388_shd	FBgn0003388	shade	shd	0	1	2	0	2	0	3	2	1	3	0	0	2	1	4	1	0	0	1	3	2	0	2	1	0	0	4
FBgn0003390_shf	FBgn0003390	shifted	shf	16	16	10	52	20	17	27	27	23	12	22	25	48	30	20	38	31	37	51	18	43	29	16	28	35	17	20
FBgn0003391_shg	FBgn0003391	shotgun	shg	497	480	363	353	145	286	208	332	265	221	218	262	468	401	363	138	106	206	162	95	166	82	85	138	85	116	174
FBgn0003392_shi	FBgn0003392	shibire	shi	637	619	723	624	234	457	245	517	364	360	322	422	487	457	402	222	213	439	157	177	348	172	173	212	135	168	272
FBgn0003396_shn	FBgn0003396	schnurri	shn	180	208	205	157	61	179	146	143	217	148	139	219	256	268	235	42	35	169	67	47	110	40	53	55	64	51	104
FBgn0003401_shu	FBgn0003401	shutdown	shu	2	1	8	7	0	4	3	3	1	3	6	1	4	2	2	0	2	2	1	0	1	0	1	1	1	2	2
FBgn0003410_sina	FBgn0003410	seven in absentia	sina	148	113	109	158	55	132	67	162	99	104	81	126	133	123	98	54	46	140	55	68	86	48	57	54	35	46	75
FBgn0003411_sisA	FBgn0003411	sisterless A	sisA	0	1	0	0	0	0	0	0	0	1	0	0	0	0	0	0	0	0	0	0	0	0	0	0	0	0	0
FBgn0003415_skd	FBgn0003415	skuld	skd	258	279	268	226	123	207	137	185	200	177	147	171	354	315	296	101	91	237	95	92	150	54	72	73	74	99	156
FBgn0003416_sl	FBgn0003416	small wing	sl	42	34	42	49	16	37	22	38	30	13	24	48	51	36	33	14	16	35	26	15	25	19	25	24	19	10	21
FBgn0003423_slgA	FBgn0003423	sluggish A	slgA	106	48	41	52	20	34	29	27	30	16	12	24	28	32	35	15	25	32	18	10	30	12	15	12	13	12	21
FBgn0003429_slo	FBgn0003429	slowpoke	slo	46	52	53	100	48	115	89	105	128	106	103	115	144	126	117	43	38	122	55	38	103	33	49	43	22	17	48
FBgn0003430_slp1	FBgn0003430	sloppy paired 1	slp1	0	6	2	1	0	0	1	0	1	0	0	0	1	0	0	0	1	1	0	0	0	0	0	0	0	0	0
FBgn0003435_sm	FBgn0003435	smooth	sm	174	194	205	112	58	103	40	79	132	65	68	80	80	74	87	43	49	119	21	33	98	30	29	27	12	21	51
FBgn0003444_smo	FBgn0003444	smoothened	smo	13	7	9	8	3	6	5	11	9	6	8	15	12	11	11	5	1	14	4	1	7	1	5	6	5	1	5
FBgn0003447_sn	FBgn0003447	singed	sn	99	75	90	92	35	53	45	34	47	32	26	41	46	56	49	35	56	56	35	28	36	21	23	38	41	42	47
FBgn0003448_sna	FBgn0003448	snail	sna	0	0	0	0	0	0	0	0	0	0	0	4	1	0	0	0	0	0	1	0	0	0	0	0	0	0	0
FBgn0003449_snf	FBgn0003449	sans fille	snf	121	86	102	96	34	53	60	63	51	53	23	50	89	80	69	36	33	56	55	38	40	27	27	57	30	52	42
FBgn0003450_snk	FBgn0003450	snake	snk	2	0	0	2	0	0	0	0	0	0	0	0	1	0	0	0	0	0	0	0	0	0	0	0	0	0	0
FBgn0003459_stwl	FBgn0003459	stonewall	stwl	12	8	7	10	4	12	5	10	10	6	7	11	14	10	10	0	1	7	3	1	10	2	8	4	3	6	1
FBgn0003460_so	FBgn0003460	sine oculis	so	5	5	11	4	1	5	2	1	3	0	0	3	3	0	2	0	0	4	0	1	3	0	0	0	0	0	2
FBgn0003462_Sod	FBgn0003462	Superoxide dismutase	Sod	3742	2709	3566	5255	1597	2276	4468	1983	1470	1242	1195	1688	2539	2236	2219	2315	2346	2536	2685	2334	2176	2392	2250	2691	5382	4059	2500
FBgn0003463_sog	FBgn0003463	short gastrulation	sog	110	98	68	172	65	100	90	121	78	74	62	87	119	100	105	60	40	93	83	46	69	39	38	58	44	50	65
FBgn0003464_sol	FBgn0003464	small optic lobes	sol	156	150	191	257	94	183	255	229	145	121	110	187	270	209	218	92	85	118	243	92	112	67	97	120	81	112	94
FBgn0003475_spir	FBgn0003475	spire	spir	195	166	239	266	136	257	167	291	265	227	185	280	357	272	285	81	78	254	94	92	186	65	104	98	44	67	153
FBgn0003479_spn-A	FBgn0003479	spindle A	spn-A	14	10	28	15	5	8	15	11	16	8	7	10	6	15	11	11	5	9	19	8	7	7	9	9	11	8	6
FBgn0003480_spn-B	FBgn0003480	spindle B	spn-B	3	3	1	3	1	1	4	1	2	1	0	0	1	2	1	0	0	3	1	0	1	2	1	0	7	1	2
FBgn0003482_spn-D	FBgn0003482	spindle D	spn-D	0	1	0	1	0	0	1	0	0	1	0	0	1	0	2	0	0	1	2	0	1	0	0	0	1	0	0
FBgn0003483_spn-E	FBgn0003483	spindle E	spn-E	1	0	2	1	0	0	2	1	2	0	0	2	2	1	2	0	1	2	0	0	0	0	0	1	1	0	1
FBgn0003486_spo	FBgn0003486	spook	spo	1	0	1	2	0	2	2	2	2	1	0	1	1	1	0	1	0	0	1	1	1	0	1	2	1	0	1
FBgn0003495_spz	FBgn0003495	spatzle	spz	7	7	8	14	5	15	8	11	14	7	3	15	13	15	9	2	5	6	7	2	5	1	1	1	4	2	4
FBgn0003499_sr	FBgn0003499	stripe	sr	7	0	7	6	0	1	1	4	7	1	1	2	1	1	2	0	1	3	0	0	2	0	0	0	1	0	2
FBgn0003502_Btk29A	FBgn0003502	Btk family kinase at 29A	Btk29A	67	69	82	50	25	57	31	58	53	41	35	58	68	56	54	19	22	55	22	18	41	10	23	14	7	4	23
FBgn0003507_srp	FBgn0003507	serpent	srp	8	10	13	7	4	3	1	4	7	4	3	4	3	5	2	7	0	2	1	2	4	1	2	1	2	0	0
FBgn0003510_Sry-alpha	FBgn0003510	Serendipity alpha	Sry-alpha	0	0	0	0	0	0	0	0	0	0	0	0	0	0	0	0	0	0	0	0	0	0	0	0	0	0	0
FBgn0003511_Sry-beta	FBgn0003511	Serendipity beta	Sry-beta	0	0	0	0	0	0	0	0	0	0	0	0	0	0	0	0	0	0	0	0	0	0	0	0	0	0	0
FBgn0003512_Sry-delta	FBgn0003512	Serendipity delta	Sry-delta	43	29	42	55	16	34	41	30	31	24	15	29	57	36	43	28	16	28	33	34	25	24	29	36	30	44	17
FBgn0003513_ss	FBgn0003513	spineless	ss	0	0	0	1	0	0	0	0	1	0	0	0	0	1	0	0	0	1	0	0	0	0	0	0	0	1	0
FBgn0003514_sqh	FBgn0003514	spaghetti squash	sqh	1426	1057	1594	2975	1015	1616	1959	2076	1075	1131	931	1506	2055	1777	1338	1002	659	845	1815	711	818	820	832	1124	1273	1410	1005
FBgn0003515_st	FBgn0003515	scarlet	st	9	3	3	9	1	5	2	1	2	1	0	1	2	2	6	1	1	3	1	1	0	1	1	5	2	2	0
FBgn0003517_sta	FBgn0003517	stubarista	sta	14268	10150	13081	16735	5880	9742	25677	13962	10472	8583	9048	12394	20409	17792	18070	6562	6533	10695	10737	8625	9543	6855	7241	8839	11894	10944	8398
FBgn0003520_stau	FBgn0003520	staufen	stau	69	73	75	65	21	80	41	68	59	54	43	82	120	101	106	22	22	81	32	19	46	16	20	18	40	15	40
FBgn0003525_stg	FBgn0003525	string	stg	15	12	14	10	3	13	5	4	12	5	7	9	16	2	6	1	1	7	5	3	5	2	3	7	7	5	0
FBgn0003527_stil	FBgn0003527	stand still	stil	0	0	0	0	0	0	0	0	0	0	0	0	0	0	0	0	0	0	0	0	0	0	0	0	0	0	0
FBgn0003545_sub	FBgn0003545	subito	sub	0	1	5	1	3	3	0	4	1	1	1	1	1	2	0	0	0	0	3	0	0	1	3	0	2	1	0
FBgn0003557_Su(dx)	FBgn0003557	Suppressor of deltex	Su(dx)	180	228	369	236	100	265	111	166	250	143	114	163	259	278	164	144	105	264	231	123	201	147	182	140	72	120	122
FBgn0003559_su(f)	FBgn0003559	suppressor of forked	su(f)	49	29	38	49	17	30	37	30	41	22	26	33	55	22	42	27	14	23	38	19	26	20	14	21	25	20	18
FBgn0003567_su(Hw)	FBgn0003567	suppressor of Hairy wing	su(Hw)	90	70	80	90	36	72	46	73	58	46	40	58	60	53	37	28	37	71	47	44	46	57	43	39	28	20	27
FBgn0003575_su(sable)	FBgn0003575	suppressor of sable	su(sable)	44	24	27	61	26	58	45	49	46	39	32	51	80	51	48	28	22	50	39	25	42	15	23	42	26	22	31
FBgn0003598_Su(var)3-7	FBgn0003598	Suppressor of variegation 3-7	Su(var)3-7	14	12	14	16	6	16	7	11	15	11	9	21	20	15	8	4	8	15	7	8	10	5	4	7	3	3	6
FBgn0003607_Su(var)205	FBgn0003607	Suppressor of variegation 205	Su(var)205	198	150	157	197	77	108	128	151	96	93	68	123	126	108	101	83	67	100	107	96	93	80	81	131	83	71	57
FBgn0003612_Su(var)2-10	FBgn0003612	Suppressor of variegation 2-10	Su(var)2-10	70	62	51	30	18	42	29	35	45	31	37	43	84	51	41	16	8	30	24	9	25	11	8	26	14	11	24
FBgn0003638_su(w[a])	FBgn0003638	suppressor of white-apricot	su(w[a])	166	94	104	108	37	79	44	81	76	73	73	88	116	116	93	30	35	78	45	40	80	31	28	38	20	14	46
FBgn0003651_svp	FBgn0003651	seven up	svp	1	2	3	3	1	3	0	1	3	1	5	2	0	7	3	1	2	3	2	3	1	3	3	3	1	2	1
FBgn0003654_sw	FBgn0003654	short wing	sw	8	4	6	10	5	5	5	10	5	7	4	6	8	4	7	2	2	7	10	2	3	4	1	3	2	1	2
FBgn0003655_swa	FBgn0003655	swallow	swa	0	1	1	0	1	0	0	0	1	2	0	1	1	1	1	0	0	1	0	0	4	0	0	0	6	1	0
FBgn0003656_sws	FBgn0003656	swiss cheese	sws	301	242	369	152	69	113	68	92	72	70	66	105	89	75	79	66	44	111	39	42	93	35	44	64	46	29	108
FBgn0003660_Syb	FBgn0003660	Synaptobrevin	Syb	671	465	720	1321	394	678	1155	763	503	459	459	677	959	734	735	449	409	557	1233	416	441	392	459	609	731	682	562
FBgn0003676_T-cp1	FBgn0003676	Tcp1-like	T-cp1	901	605	594	472	132	246	457	342	224	216	187	243	372	311	357	158	101	204	394	164	219	226	200	275	366	344	189
FBgn0003683_term	FBgn0003683	terminus	term	0	0	0	0	0	0	0	0	0	0	0	0	0	0	0	0	0	0	0	0	0	0	0	0	0	0	0
FBgn0003687_Tbp	FBgn0003687	TATA binding protein	Tbp	113	101	111	91	39	64	90	79	83	57	43	69	119	93	104	45	32	77	77	35	76	32	29	43	70	47	61
FBgn0003701_thr	FBgn0003701	three rows	thr	0	0	1	0	1	0	1	2	1	1	2	1	0	2	1	0	0	0	0	0	1	0	0	0	0	0	0
FBgn0003710_tipE	FBgn0003710	temperature-induced paralytic E	tipE	1	0	0	0	1	2	0	0	0	1	0	2	1	2	1	0	0	0	1	2	0	1	0	0	0	1	2
FBgn0003714_tko	FBgn0003714	technical knockout	tko	640	366	526	343	96	162	391	206	134	142	111	220	217	200	201	169	171	174	186	172	163	204	178	226	423	270	212
FBgn0003716_tkv	FBgn0003716	thickveins	tkv	38	60	132	109	58	89	62	109	125	79	68	113	92	107	100	50	42	105	34	38	67	21	58	16	13	16	32
FBgn0003719_tld	FBgn0003719	tolloid	tld	0	3	1	0	0	0	0	0	0	0	0	0	0	0	2	0	0	0	0	0	0	0	1	0	0	0	0
FBgn0003720_tll	FBgn0003720	tailless	tll	0	0	0	0	0	0	0	0	0	0	0	0	0	0	0	0	0	0	0	0	0	0	0	0	0	0	0
FBgn0003721_Tm1	FBgn0003721	Tropomyosin 1	Tm1	6882	4734	6374	5856	2088	4534	2803	3244	2899	1935	1894	3040	2606	2304	2687	2203	1967	3461	2483	1510	2484	1393	1525	2090	1599	1285	1756
FBgn0003731_Egfr	FBgn0003731	Epidermal growth factor receptor	Egfr	35	33	34	52	22	34	22	43	65	37	32	50	54	53	45	16	17	38	13	21	34	16	17	23	19	10	21
FBgn0003732_Top2	FBgn0003732	Topoisomerase 2	Top2	90	66	85	61	27	34	24	41	52	31	26	37	39	29	41	27	9	29	20	16	37	21	23	21	4	6	10
FBgn0003733_tor	FBgn0003733	torso	tor	4	1	0	0	1	1	0	0	0	0	0	0	1	0	0	1	0	2	1	0	0	0	0	0	1	1	1
FBgn0003741_tra	FBgn0003741	transformer	tra	35	25	45	30	7	28	24	30	29	26	14	36	43	38	48	12	9	22	23	8	20	15	15	13	13	17	36
FBgn0003742_tra2	FBgn0003742	transformer 2	tra2	52	49	49	58	31	31	37	47	30	24	25	46	53	57	40	24	14	40	31	24	32	23	27	40	30	40	19
FBgn0003744_trc	FBgn0003744	tricornered	trc	45	42	44	48	23	42	42	31	31	34	23	48	46	55	33	21	21	40	30	26	31	17	19	30	21	22	20
FBgn0003747_Gr5a	FBgn0003747	Gustatory receptor 5a	Gr5a	0	0	0	0	0	1	0	0	0	0	0	0	0	0	0	0	0	0	0	0	0	0	0	0	0	0	0
FBgn0003748_Treh	FBgn0003748	Trehalase	Treh	2062	1325	2268	2920	1298	2371	2152	2448	1647	1270	1450	1741	3130	1547	1814	1261	1022	1772	3263	757	1363	690	1023	1580	1444	1344	1130
FBgn0003751_trk	FBgn0003751	trunk	trk	2	3	2	3	0	3	0	0	1	1	2	3	3	1	2	0	0	0	5	0	1	0	1	2	0	2	0
FBgn0003861_trp	FBgn0003861	transient receptor potential	trp	0	0	0	1	0	0	0	0	0	0	0	0	0	0	0	1	0	0	2	0	0	0	0	1	0	0	0
FBgn0003862_trx	FBgn0003862	trithorax	trx	304	244	298	194	78	221	125	183	275	219	156	322	308	254	260	55	53	235	53	45	136	44	77	55	37	35	96
FBgn0003863_alphaTry	FBgn0003863	alphaTrypsin	alphaTry	31906	33709	46793	222131	93693	130354	273965	241158	176376	143677	160813	190473	378817	310576	262358	148543	111917	184398	246909	252885	240187	237062	220844	282837	440892	416515	281021
FBgn0003865_tsg	FBgn0003865	twisted gastrulation	tsg	0	0	0	0	0	0	0	0	0	0	0	0	0	0	0	0	0	0	0	0	0	0	0	0	0	0	0
FBgn0003866_tsh	FBgn0003866	teashirt	tsh	20	17	19	19	6	27	17	16	15	13	17	18	25	19	18	11	9	18	20	7	1	8	7	20	8	10	11
FBgn0003867_tsl	FBgn0003867	torso-like	tsl	13	6	6	9	3	6	11	10	7	7	4	3	10	3	4	3	4	7	5	5	2	3	5	10	3	9	3
FBgn0003870_ttk	FBgn0003870	tramtrack	ttk	319	156	260	188	83	162	74	191	145	112	118	212	177	150	166	73	54	147	37	40	116	36	50	68	35	45	78
FBgn0003882_tub	FBgn0003882	tube	tub	63	70	81	49	28	51	30	45	48	39	34	43	70	49	39	30	17	42	29	33	48	15	25	34	17	14	33
FBgn0003884_alphaTub84B	FBgn0003884	alpha-Tubulin at 84B	alphaTub84B	9659	5622	6253	8395	2971	5170	6948	4788	2684	2608	2381	4188	6666	4789	5286	2124	2204	3210	7008	1328	2203	1633	1762	2680	4241	3418	3005
FBgn0003885_alphaTub84D	FBgn0003885	alpha-Tubulin at 84D	alphaTub84D	813	522	705	521	206	425	611	453	339	267	259	530	746	470	629	215	195	368	837	182	322	204	225	355	385	268	417
FBgn0003886_alphaTub85E	FBgn0003886	alpha-Tubulin at 85E	alphaTub85E	0	0	0	0	0	0	0	0	0	0	0	0	0	0	0	0	0	0	0	0	0	0	0	0	0	0	0
FBgn0003887_betaTub56D	FBgn0003887	beta-Tubulin at 56D	betaTub56D	4358	2376	3396	5369	1992	3331	4357	3017	1786	1663	1479	2585	3293	2807	3073	1503	1495	2072	3687	929	1441	1222	1305	2050	2538	2164	2033
FBgn0003888_betaTub60D	FBgn0003888	beta-Tubulin at 60D	betaTub60D	95	53	187	608	164	340	317	445	179	203	140	295	228	233	187	122	13	22	110	28	21	34	39	53	46	79	32
FBgn0003889_betaTub85D	FBgn0003889	beta-Tubulin at 85D	betaTub85D	0	0	1	0	0	0	0	0	0	0	0	0	0	0	0	0	0	0	0	0	0	0	0	0	0	0	0
FBgn0003890_betaTub97EF	FBgn0003890	beta-Tubulin at 97EF	betaTub97EF	2555	2114	2493	1418	482	916	1284	842	623	475	439	746	1176	889	938	662	586	886	938	544	683	502	592	718	1014	714	655
FBgn0003891_tud	FBgn0003891	tudor	tud	301	277	342	185	69	247	262	163	273	139	163	275	399	344	308	74	57	261	92	73	129	41	67	44	248	86	129
FBgn0003892_ptc	FBgn0003892	patched	ptc	83	108	94	70	35	52	35	65	48	38	25	52	64	46	47	41	51	69	34	30	53	29	12	23	26	18	32
FBgn0003896_tup	FBgn0003896	tailup	tup	29	19	28	30	9	39	22	29	38	16	12	27	24	17	28	13	14	37	13	7	25	16	12	11	4	3	21
FBgn0003900_twi	FBgn0003900	twist	twi	1	0	0	0	0	0	2	0	0	0	0	0	0	0	0	0	0	0	0	0	0	1	0	0	0	0	0
FBgn0003916_snRNA:U1:21D	FBgn0003916	small nuclear RNA U1 at 21D	snRNA:U1:21D	0	0	0	0	0	0	0	0	0	0	0	0	0	0	0	0	0	0	0	0	0	0	0	1	1	0	0
FBgn0003920_snRNA:U2:14B	FBgn0003920	small nuclear RNA U2 at 14B	snRNA:U2:14B	2	0	0	4	0	0	1	0	0	0	0	0	0	1	0	2	0	1	0	0	0	0	0	1	0	0	0
FBgn0003922_snRNA:U2:38ABa	FBgn0003922	small nuclear RNA U2 at 38ABa	snRNA:U2:38ABa	0	0	0	0	0	0	0	0	0	0	0	0	0	0	0	0	0	0	0	0	0	0	0	0	0	0	0
FBgn0003923_snRNA:U2:38ABb	FBgn0003923	small nuclear RNA U2 at 38ABb	snRNA:U2:38ABb	0	0	0	0	0	0	0	1	0	0	0	0	0	0	0	0	0	0	0	0	0	0	0	0	0	0	0
FBgn0003926_snRNA:U3:22A	FBgn0003926	small nuclear RNA U3 at 22A	snRNA:U3:22A	0	0	0	0	0	0	0	0	0	0	0	0	0	0	0	0	0	0	0	0	0	0	0	0	0	0	0
FBgn0003930_snRNA:U4:39B	FBgn0003930	small nuclear RNA U4 at 39B	snRNA:U4:39B	22	15	15	42	7	9	22	11	5	8	8	6	3	8	7	9	11	9	1	5	5	10	3	7	24	10	5
FBgn0003931_snRNA:U4:38AB	FBgn0003931	small nuclear RNA U4 at 38AB	snRNA:U4:38AB	0	0	0	0	0	1	0	0	0	2	1	1	0	0	0	0	1	0	0	0	0	0	0	0	0	0	0
FBgn0003933_snRNA:U5:14B	FBgn0003933	small nuclear RNA U5 at 14B	snRNA:U5:14B	0	0	0	0	0	0	0	0	0	0	0	0	0	0	0	0	0	0	0	0	0	0	0	0	0	0	0
FBgn0003934_snRNA:U5:23D	FBgn0003934	small nuclear RNA U5 at 23DE	snRNA:U5:23D	0	0	0	0	0	0	1	0	0	0	0	0	0	0	0	0	0	0	1	0	0	0	0	0	0	0	0
FBgn0003935_snRNA:U5:34A	FBgn0003935	small nuclear RNA U5 at 34AB	snRNA:U5:34A	1	1	0	1	0	0	0	0	1	0	0	0	0	0	0	0	0	0	0	0	0	0	0	0	1	0	0
FBgn0003936_snRNA:U5:35D	FBgn0003936	small nuclear RNA U5 at 35EF	snRNA:U5:35D	0	0	0	0	0	0	0	1	0	0	0	0	0	0	0	0	0	0	0	0	0	0	0	0	0	0	0
FBgn0003938_snRNA:U5:63BC	FBgn0003938	small nuclear RNA U5 at 63A	snRNA:U5:63BC	7	8	6	15	4	3	22	6	8	5	5	1	4	5	5	4	4	4	2	2	4	9	5	4	18	8	0
FBgn0003941_RpL40	FBgn0003941	Ribosomal protein L40	RpL40	5715	3650	5495	6118	2303	4147	6509	5368	4382	3794	3903	5921	8478	7333	7141	2682	2318	4221	4442	2614	4303	2789	2734	3985	3550	3453	3977
FBgn0003942_RpS27A	FBgn0003942	Ribosomal protein S27A	RpS27A	8581	6242	8866	11398	3993	6327	10620	8704	6323	5119	5330	7445	12095	10075	9347	5348	4880	6633	8445	6246	6703	5528	6159	7137	8201	8554	5800
FBgn0003943_Ubi-p63E	FBgn0003943	Ubiquitin-63E	Ubi-p63E	558	590	560	644	198	378	661	353	300	245	232	418	456	422	435	195	169	328	344	260	301	249	233	312	418	490	378
FBgn0003944_Ubx	FBgn0003944	Ultrabithorax	Ubx	28	24	29	14	11	14	18	17	5	5	9	10	8	17	15	7	6	6	8	4	14	3	2	8	10	3	12
FBgn0003950_unc	FBgn0003950	uncoordinated	unc	0	0	0	0	0	0	0	1	0	1	0	0	0	0	0	1	0	0	0	0	0	0	0	0	0	0	0
FBgn0003961_Uro	FBgn0003961	Urate oxidase	Uro	1	0	0	1	0	0	2	2	0	0	0	0	0	0	1	3	0	0	1	1	0	0	0	0	3	0	0
FBgn0003963_ush	FBgn0003963	u-shaped	ush	17	8	16	11	4	9	5	18	17	10	14	7	23	18	15	2	2	13	1	4	12	2	2	4	2	0	3
FBgn0003964_usp	FBgn0003964	ultraspiracle	usp	29	46	35	72	23	28	36	28	45	35	26	39	68	63	41	17	18	42	45	28	32	16	17	30	22	19	41
FBgn0003965_v	FBgn0003965	vermilion	v	0	1	3	2	1	4	2	1	0	1	2	0	3	1	0	2	1	1	0	0	1	0	0	0	0	0	0
FBgn0003969_vap	FBgn0003969	vacuolar peduncle	vap	18	21	39	60	13	34	40	32	23	27	26	36	46	46	34	18	11	23	38	8	28	13	10	17	21	16	15
FBgn0003975_vg	FBgn0003975	vestigial	vg	1	4	2	1	0	0	0	0	2	0	0	0	0	1	0	1	0	1	1	0	1	1	0	0	1	0	0
FBgn0003977_vir	FBgn0003977	virilizer	vir	17	15	19	8	10	6	7	5	10	3	6	6	11	7	10	3	9	16	5	2	9	0	5	9	3	11	8
FBgn0003978_vls	FBgn0003978	valois	vls	71	43	88	51	27	30	53	50	22	25	13	34	52	45	43	24	21	25	34	18	17	10	18	22	45	36	17
FBgn0003979_Vm26Aa	FBgn0003979	Vitelline membrane 26Aa	Vm26Aa	2	0	0	0	0	0	3	0	0	0	0	0	0	0	0	0	0	0	4	0	0	0	0	0	0	5	0
FBgn0003980_Vm26Ab	FBgn0003980	Vitelline membrane 26Ab	Vm26Ab	1	0	0	0	0	0	0	0	0	0	0	0	0	0	0	1	1	1	4	0	0	0	1	0	3	1	0
FBgn0003983_Vm34Ca	FBgn0003983	Vitelline membrane 34Ca	Vm34Ca	0	1	0	1	0	0	2	0	0	0	0	0	0	1	0	0	0	0	4	1	0	0	0	0	2	1	0
FBgn0003984_vn	FBgn0003984	vein	vn	11	24	38	18	5	15	16	16	26	11	7	17	11	8	9	6	3	9	5	4	3	3	1	0	1	0	3
FBgn0003996_w	FBgn0003996	white	w	15	3	17	10	2	2	5	1	2	0	1	2	0	1	4	5	5	5	4	3	1	3	3	1	3	0	3
FBgn0003997_hid	FBgn0003997	head involution defective	hid	60	49	71	246	101	163	100	234	140	170	125	161	144	143	138	70	52	70	74	59	87	88	82	56	43	45	47
FBgn0004003_wbl	FBgn0004003	windbeutel	wbl	13	16	22	9	12	12	10	13	4	4	4	10	9	7	14	8	5	10	14	15	9	8	5	13	16	11	16
FBgn0004009_wg	FBgn0004009	wingless	wg	5	7	9	12	4	5	1	2	5	4	2	8	7	5	5	2	2	8	1	1	8	3	2	0	1	0	1
FBgn0004034_y	FBgn0004034	yellow	y	0	0	0	0	0	2	0	0	0	0	0	0	0	0	0	3	0	0	1	1	0	0	0	3	1	0	0
FBgn0004045_Yp1	FBgn0004045	Yolk protein 1	Yp1	3	15	48	89	51	26	186	55	6	69	93	13	104	44	33	97	33	60	115	90	19	51	59	18	162	124	39
FBgn0004047_Yp3	FBgn0004047	Yolk protein 3	Yp3	10	13	40	124	59	72	123	69	92	53	79	76	145	109	90	69	55	132	156	71	83	74	73	73	158	138	91
FBgn0004049_yrt	FBgn0004049	yurt	yrt	162	101	135	92	49	106	41	80	79	74	76	92	104	84	88	58	33	102	44	30	72	23	27	44	24	10	48
FBgn0004050_z	FBgn0004050	zeste	z	81	52	71	67	43	61	80	79	69	55	53	69	132	73	94	43	31	46	131	47	53	41	48	59	66	60	44
FBgn0004052_Z600	FBgn0004052	Z600	Z600	0	0	0	0	0	0	0	0	1	0	0	0	0	1	0	0	0	0	0	0	0	0	0	0	0	0	0
FBgn0004053_zen	FBgn0004053	zerknullt	zen	0	0	0	0	0	0	0	0	0	0	0	0	0	0	0	0	0	0	0	0	0	0	0	0	1	0	0
FBgn0004054_zen2	FBgn0004054	zerknullt-related	zen2	0	0	0	0	0	0	0	0	0	0	0	0	0	0	0	0	0	0	0	0	1	0	0	0	0	0	0
FBgn0004055_uzip	FBgn0004055	unzipped	uzip	5	5	11	10	3	14	6	11	8	0	4	14	2	7	8	0	2	7	4	5	8	1	7	3	6	0	2
FBgn0004057_Zw	FBgn0004057	Zwischenferment	Zw	2007	2067	2103	663	183	311	251	178	227	99	129	267	276	195	262	350	344	457	273	175	275	204	177	224	290	247	224
FBgn0004066_Prosalpha4	FBgn0004066	Proteasome alpha4 subunit	Prosalpha4	454	321	459	594	192	305	366	329	165	181	206	274	302	232	215	230	171	203	283	203	239	240	236	356	314	259	213
FBgn0004087_Dhfr	FBgn0004087	Dihydrofolate reductase	Dhfr	115	92	68	140	40	64	301	89	66	62	55	75	151	104	155	49	38	65	133	68	64	64	48	63	329	110	64
FBgn0004101_bs	FBgn0004101	blistered	bs	56	51	54	47	22	47	40	51	37	40	31	28	57	46	34	24	26	39	23	16	37	14	18	22	10	12	30
FBgn0004102_oc	FBgn0004102	ocelliless	oc	0	0	0	0	1	0	0	1	0	0	1	1	0	0	0	1	0	0	0	0	0	0	0	0	0	0	0
FBgn0004103_Pp1-87B	FBgn0004103	Protein phosphatase 1 at 87B	Pp1-87B	969	870	1104	1056	404	800	657	828	594	526	440	732	956	731	656	387	358	606	613	335	543	334	321	483	306	379	474
FBgn0004106_Cdk1	FBgn0004106	Cyclin-dependent kinase 1	Cdk1	5	1	2	5	3	7	5	4	5	1	2	2	3	1	5	3	3	2	2	2	2	1	2	1	0	2	2
FBgn0004107_Cdk2	FBgn0004107	Cyclin-dependent kinase 2	Cdk2	10	12	13	6	1	3	5	8	6	2	3	6	10	5	3	1	1	8	1	2	2	1	3	3	2	0	4
FBgn0004108_Nrt	FBgn0004108	Neurotactin	Nrt	11	6	13	26	9	11	15	7	17	4	10	10	15	8	22	7	10	12	7	7	8	10	7	9	4	6	6
FBgn0004110_tin	FBgn0004110	tinman	tin	0	0	1	0	0	0	0	0	0	0	0	0	0	0	0	1	0	0	0	0	0	0	0	0	0	0	0
FBgn0004117_Tm2	FBgn0004117	Tropomyosin 2	Tm2	971	928	1153	692	289	666	624	329	474	150	204	394	508	480	515	260	287	593	551	167	373	155	125	234	208	169	372
FBgn0004118_nAChRbeta2	FBgn0004118	nicotinic Acetylcholine Receptor beta2	nAChRbeta2	1	0	1	0	0	0	1	1	1	0	0	1	1	0	1	1	0	1	0	0	0	0	0	0	0	1	0
FBgn0004132_boca	FBgn0004132	boca	boca	133	104	118	133	29	66	151	73	57	45	48	76	128	111	79	62	34	64	101	64	84	78	62	77	245	124	102
FBgn0004133_blow	FBgn0004133	blown fuse	blow	17	6	7	3	0	3	2	1	2	1	1	3	2	1	3	2	1	2	1	2	1	0	0	3	1	2	0
FBgn0004143_nullo	FBgn0004143	nullo	nullo	0	0	0	0	0	0	0	0	0	0	0	0	0	0	0	0	0	0	0	1	0	0	0	0	0	0	0
FBgn0004167_kst	FBgn0004167	karst	kst	840	836	1083	769	340	1038	400	659	938	666	633	670	713	848	751	245	181	851	140	224	497	150	207	182	146	98	365
FBgn0004168_5-HT1A	FBgn0004168	5-hydroxytryptamine (serotonin) receptor 1A	5-HT1A	2	1	2	2	0	0	1	2	2	2	1	1	1	3	4	1	0	1	1	3	3	0	1	0	0	0	2
FBgn0004169_up	FBgn0004169	upheld	up	1334	967	1072	808	313	694	644	314	452	115	182	377	500	492	528	275	343	588	470	159	336	130	146	205	229	216	411
FBgn0004170_sc	FBgn0004170	scute	sc	0	0	0	0	0	1	1	2	2	2	2	1	1	2	2	0	0	0	0	0	1	0	1	0	0	0	0
FBgn0004171_Mst98Cb	FBgn0004171	Male-specific RNA 98Cb	Mst98Cb	0	0	0	0	0	0	0	0	0	0	0	0	0	0	0	0	0	0	0	0	0	0	0	0	0	0	0
FBgn0004172_Mst84Da	FBgn0004172	Male-specific RNA 84Da	Mst84Da	0	0	0	0	0	0	0	0	0	0	0	0	0	0	0	0	0	0	0	0	0	0	0	0	0	0	0
FBgn0004173_Mst84Db	FBgn0004173	Male-specific RNA 84Db	Mst84Db	0	0	0	0	0	0	0	0	0	0	0	0	0	0	0	0	0	0	0	0	0	1	0	0	0	0	0
FBgn0004174_Mst84Dc	FBgn0004174	Male-specific RNA 84Dc	Mst84Dc	0	0	1	0	0	0	0	0	0	0	0	0	0	0	0	0	0	0	0	0	0	0	0	0	0	0	0
FBgn0004175_Mst84Dd	FBgn0004175	Male-specific RNA 84Dd	Mst84Dd	0	0	0	0	0	0	0	0	1	0	0	0	0	0	0	0	0	0	0	0	0	0	0	0	0	0	0
FBgn0004177_mts	FBgn0004177	microtubule star	mts	1703	1894	2034	2445	1021	1624	1668	1601	1516	1131	1005	1428	2721	2234	1858	1030	1004	1649	2691	990	1405	884	917	1085	1130	1004	1326
FBgn0004179_Csp	FBgn0004179	Cysteine string protein	Csp	301	301	433	502	169	395	312	391	321	286	232	429	520	348	373	191	147	335	340	147	290	146	198	254	155	124	238
FBgn0004181_Ebp	FBgn0004181	Ejaculatory bulb protein	Ebp	0	0	0	0	0	0	0	0	0	0	0	0	0	0	0	0	0	0	0	0	0	0	0	0	0	0	0
FBgn0004183_snRNA:U1:82Eb	FBgn0004183	small nuclear RNA U1 at 82Eb	snRNA:U1:82Eb	1	0	1	1	0	0	3	0	1	0	0	0	1	0	0	0	1	0	0	0	0	1	0	0	5	0	0
FBgn0004185_snRNA:U1:95Ca	FBgn0004185	small nuclear RNA U1 at 95Ca	snRNA:U1:95Ca	0	0	0	0	0	0	0	0	0	0	0	0	0	0	0	0	0	0	0	0	0	0	0	0	0	0	0
FBgn0004186_snRNA:U1:95Cb	FBgn0004186	small nuclear RNA U1 at 95Cb	snRNA:U1:95Cb	0	0	0	0	0	0	0	0	0	0	0	0	0	0	0	0	0	1	0	0	0	0	0	0	0	0	0
FBgn0004187_snRNA:U1:95Cc	FBgn0004187	small nuclear RNA U1 at 95Cc	snRNA:U1:95Cc	0	0	0	0	0	0	0	1	0	0	0	0	0	0	0	0	0	0	0	0	0	0	0	0	0	0	0
FBgn0004188_snRNA:U6:96Aa	FBgn0004188	small nuclear RNA U6 at 96Aa	snRNA:U6:96Aa	0	0	0	0	0	0	0	0	0	0	0	0	0	0	0	0	0	0	0	0	0	0	0	0	0	0	0
FBgn0004189_snRNA:U6:96Ab	FBgn0004189	small nuclear RNA U6 at 96Ab	snRNA:U6:96Ab	0	0	2	0	0	1	0	0	0	0	0	0	0	3	0	0	0	0	0	0	0	0	0	0	0	0	0
FBgn0004190_snRNA:U6:96Ac	FBgn0004190	small nuclear RNA U6 at 96Ac	snRNA:U6:96Ac	1	0	0	1	0	0	1	0	0	0	0	0	0	0	0	1	0	2	3	0	1	0	0	1	0	0	0
FBgn0004191_snRNA:U2:34ABa	FBgn0004191	small nuclear RNA U2 at 34ABa	snRNA:U2:34ABa	1	4	3	4	1	3	3	0	0	1	1	1	1	0	0	0	1	1	1	0	2	2	1	0	2	0	0
FBgn0004192_snRNA:U2:34ABb	FBgn0004192	small nuclear RNA U2 at 34ABb	snRNA:U2:34ABb	0	0	0	1	0	0	0	0	0	0	0	0	0	1	0	0	0	0	0	0	0	0	0	0	0	1	0
FBgn0004197_Ser	FBgn0004197	Serrate	Ser	8	11	13	8	3	15	3	6	12	2	1	5	6	4	11	3	3	8	9	3	7	2	4	5	0	5	1
FBgn0004198_ct	FBgn0004198	cut	ct	12	8	4	3	4	4	1	2	1	4	2	6	1	5	0	3	1	5	0	0	2	2	3	0	0	0	0
FBgn0004227_nonA	FBgn0004227	no on or off transient A	nonA	184	135	160	132	59	109	59	123	87	82	71	123	107	106	111	60	54	98	73	50	74	59	43	70	33	29	46
FBgn0004228_mex1	FBgn0004228	midgut expression 1	mex1	808	977	1478	2842	987	1538	3068	2216	1286	1266	1140	2001	2814	2208	2124	920	855	1135	3513	1245	1179	1205	1525	1351	2595	2186	1304
FBgn0004237_Hrb87F	FBgn0004237	Heterogeneous nuclear ribonucleoprotein at 87F	Hrb87F	491	479	553	518	188	265	178	317	217	205	234	195	311	283	232	175	192	290	229	181	238	166	155	194	88	155	187
FBgn0004240_DptA	FBgn0004240	Diptericin A	DptA	4	5	4	93	27	16	72	107	14	243	152	127	82	72	61	61	18	16	86	44	23	47	302	99	270	33	82
FBgn0004242_Syt1	FBgn0004242	Synaptotagmin 1	Syt1	25	9	13	17	6	10	5	13	12	2	13	16	11	9	8	6	6	9	13	10	17	11	5	12	6	18	12
FBgn0004244_Rdl	FBgn0004244	Resistant to dieldrin	Rdl	1	2	4	4	1	2	2	1	2	1	1	4	4	4	2	0	2	4	1	1	0	1	1	1	2	1	4
FBgn0004359_T48	FBgn0004359	Transcript 48	T48	26	12	14	14	2	9	4	11	10	5	3	4	8	10	7	1	4	2	2	1	7	1	1	2	3	3	4
FBgn0004360_Wnt2	FBgn0004360	Wnt oncogene analog 2	Wnt2	0	0	0	1	0	0	0	0	0	0	0	0	2	1	0	0	0	0	0	0	0	0	1	0	0	0	0
FBgn0004362_HmgD	FBgn0004362	High mobility group protein D	HmgD	284	178	198	309	107	173	347	237	158	128	129	207	331	215	171	102	71	104	261	66	112	95	81	108	170	107	62
FBgn0004363_porin	FBgn0004363	porin	porin	12071	8205	8813	11212	4569	6716	10767	6026	4446	3791	3652	5698	9526	7294	7181	5577	6207	7460	11644	4508	5650	4672	4370	6560	12466	7506	5893
FBgn0004364_18w	FBgn0004364	18 wheeler	18w	10	22	16	8	1	9	4	6	11	6	6	13	9	8	10	2	3	13	2	3	4	0	5	0	0	1	2
FBgn0004367_mei-41	FBgn0004367	meiotic 41	mei-41	2	6	2	1	2	1	4	3	1	9	0	4	3	5	11	1	1	4	3	3	5	1	0	1	1	0	0
FBgn0004368_Ptp4E	FBgn0004368	Protein tyrosine phosphatase 4E	Ptp4E	123	74	78	110	29	59	39	57	47	43	36	69	56	33	35	31	19	40	38	17	53	33	27	36	26	17	39
FBgn0004369_Ptp99A	FBgn0004369	Protein tyrosine phosphatase 99A	Ptp99A	99	118	113	78	38	86	89	110	109	77	76	92	139	144	117	30	26	86	23	23	63	19	23	26	23	18	37
FBgn0004370_Ptp10D	FBgn0004370	Protein tyrosine phosphatase 10D	Ptp10D	51	49	59	33	15	29	22	25	33	18	20	32	12	17	17	12	13	29	6	12	18	6	6	16	5	2	8
FBgn0004372_aly	FBgn0004372	always early	aly	0	0	0	0	0	0	0	0	0	0	0	0	0	0	0	0	0	0	0	0	0	0	0	0	0	0	0
FBgn0004373_fwd	FBgn0004373	four wheel drive	fwd	108	100	192	119	42	117	68	113	93	66	80	114	111	124	119	37	49	144	52	42	64	30	37	46	24	36	74
FBgn0004374_neb	FBgn0004374	nebbish	neb	13	20	12	28	6	21	11	23	20	14	15	29	17	16	13	14	8	17	14	10	12	13	15	12	10	9	6
FBgn0004378_Klp61F	FBgn0004378	Kinesin-like protein at 61F	Klp61F	7	5	10	16	5	13	13	11	6	7	5	9	16	5	8	5	0	6	3	3	8	2	8	2	4	1	1
FBgn0004379_Klp67A	FBgn0004379	Kinesin-like protein at 67A	Klp67A	0	2	3	5	1	6	2	2	2	2	4	3	3	3	2	0	0	1	4	3	0	0	0	4	0	0	0
FBgn0004380_Klp64D	FBgn0004380	Kinesin-like protein at 64D	Klp64D	30	23	43	59	26	42	30	41	35	26	35	43	34	34	48	28	14	23	33	16	31	14	31	37	25	18	22
FBgn0004381_Klp68D	FBgn0004381	Kinesin-like protein at 68D	Klp68D	9	6	21	22	7	8	14	16	8	12	8	12	4	8	3	2	2	6	14	4	3	7	5	3	5	7	7
FBgn0004387_Klp98A	FBgn0004387	Kinesin-like protein at 98A	Klp98A	73	68	88	151	54	113	56	108	101	85	64	121	105	93	108	64	57	96	95	83	108	58	54	120	44	58	60
FBgn0004389_bnk	FBgn0004389	bottleneck	bnk	0	0	3	0	0	0	0	0	0	0	0	1	0	0	0	0	0	0	0	0	0	0	0	0	0	0	0
FBgn0004390_RasGAP1	FBgn0004390	Ras GTPase activating protein 1	RasGAP1	55	38	35	38	16	48	31	53	37	38	36	43	41	50	54	20	12	53	17	14	41	20	19	23	24	24	16
FBgn0004391_shtd	FBgn0004391	shattered	shtd	7	5	9	13	6	9	7	14	10	8	4	9	10	11	2	3	4	5	8	8	8	3	4	2	6	2	2
FBgn0004394_pdm2	FBgn0004394	POU domain protein 2	pdm2	7	6	7	9	7	10	11	10	16	8	15	24	23	13	25	3	2	5	9	1	9	2	2	6	0	5	6
FBgn0004395_unk	FBgn0004395	unkempt	unk	31	31	40	80	37	65	79	88	71	66	59	83	106	107	100	46	38	65	136	53	46	44	56	60	46	57	55
FBgn0004396_CrebA	FBgn0004396	Cyclic-AMP response element binding protein A	CrebA	398	302	491	230	96	368	252	214	328	260	191	357	755	674	446	69	58	324	146	49	239	57	80	67	93	57	306
FBgn0004397_Vinc	FBgn0004397	Vinculin	Vinc	135	115	144	195	69	120	106	134	76	62	48	73	73	109	77	49	42	67	38	32	46	27	30	41	46	51	59
FBgn0004400_rhi	FBgn0004400	rhino	rhi	0	0	1	0	0	0	0	0	0	0	0	0	0	0	0	0	0	0	0	0	0	0	0	0	1	1	0
FBgn0004401_Pep	FBgn0004401	Protein on ecdysone puffs	Pep	440	346	343	236	105	207	115	198	173	154	147	190	277	242	216	98	72	185	141	90	146	83	96	108	65	61	85
FBgn0004403_RpS14a	FBgn0004403	Ribosomal protein S14a	RpS14a	21576	15076	20490	27674	10544	16296	31926	23590	16995	14618	15727	21103	35396	27258	27501	13442	11889	16625	24244	14461	18746	14436	14542	20287	23003	17865	16651
FBgn0004404_RpS14b	FBgn0004404	Ribosomal protein S14b	RpS14b	2314	1781	2407	3260	1126	1728	3199	2450	1699	1580	1650	2074	3119	2448	2667	1470	1246	1789	2132	1670	1877	1537	1723	1954	2399	1863	1459
FBgn0004406_tam	FBgn0004406	tamas	tam	17	11	11	5	6	12	5	7	11	6	8	9	23	13	14	4	3	8	22	6	9	5	6	16	8	10	10
FBgn0004407_DNApol-gamma35	FBgn0004407	DNA polymerase gamma 35kD	DNApol-gamma35	0	0	0	0	0	0	0	0	0	0	0	0	0	0	0	0	0	0	0	0	0	0	0	0	0	0	0
FBgn0004414_msopa	FBgn0004414	male-specific opa containing gene	msopa	0	0	0	0	0	0	0	0	0	0	0	0	0	0	0	0	0	0	0	0	0	0	0	0	0	0	0
FBgn0004419_me31B	FBgn0004419	maternal expression at 31B	me31B	270	199	249	206	85	148	175	154	113	99	98	163	183	179	126	74	65	142	100	53	112	54	57	102	100	73	101
FBgn0004425_LysB	FBgn0004425	Lysozyme B	LysB	225	439	356	7806	3429	6041	6698	6959	5881	3743	4754	7812	8608	6574	5352	7512	6608	10058	14351	12219	13293	11269	10325	16273	18138	14873	20627
FBgn0004426_LysC	FBgn0004426	Lysozyme C	LysC	2	10	20	226	95	187	239	201	159	122	176	225	400	258	186	193	127	343	535	248	375	216	320	390	611	415	605
FBgn0004427_LysD	FBgn0004427	Lysozyme D	LysD	889	2493	2224	43281	21139	28800	36868	31981	27074	22092	21838	24809	46543	44504	26364	38834	35622	63467	34898	63023	68245	51887	46707	57612	64217	73692	82552
FBgn0004428_LysE	FBgn0004428	Lysozyme E	LysE	83	267	208	5712	2165	2562	6436	4905	3412	2248	1823	2453	2147	2184	1246	7426	5515	8176	8256	16772	13444	11278	9351	12900	8117	9239	10726
FBgn0004429_LysP	FBgn0004429	Lysozyme P	LysP	0	6	3	65	3	48	3	83	2	97	3	198	53	122	179	1	26	46	0	43	30	0	16	0	2	13	40
FBgn0004430_LysS	FBgn0004430	Lysozyme S	LysS	0	0	1	9	4	4	7	1	1	2	2	6	5	3	1	10	1	8	6	3	2	2	3	4	7	3	10
FBgn0004431_LysX	FBgn0004431	Lysozyme X	LysX	1103	155	336	3172	1046	2046	1704	1894	877	611	351	1343	549	452	442	780	166	176	1480	506	253	738	681	745	957	1025	604
FBgn0004432_Cyp1	FBgn0004432	Cyclophilin 1	Cyp1	7192	5159	6968	7442	2647	4716	4457	4139	2942	2444	2305	3633	4975	4189	3657	3542	3280	4431	5617	2887	3327	2933	3165	4356	3942	4158	3334
FBgn0004435_Galphaq	FBgn0004435	G protein alpha q subunit	Galphaq	94	105	134	144	47	124	101	104	92	71	62	120	153	114	127	64	62	79	91	35	94	22	56	58	40	19	54
FBgn0004436_Ubc6	FBgn0004436	Ubiquitin conjugating enzyme 6	Ubc6	165	190	218	146	65	134	126	127	145	101	96	146	236	161	200	73	68	141	125	63	94	37	46	65	62	48	126
FBgn0004449_Ten-m	FBgn0004449	Tenascin major	Ten-m	51	49	63	64	20	53	39	42	46	24	25	44	46	43	46	23	9	35	21	13	26	8	8	5	15	7	26
FBgn0004456_mew	FBgn0004456	multiple edematous wings	mew	442	497	765	996	303	631	475	768	607	526	434	738	965	699	638	403	213	479	662	296	565	368	353	432	346	251	295
FBgn0004463_RpIII128	FBgn0004463	RNA polymerase III 128kD subunit	RpIII128	69	49	65	47	23	47	50	56	37	31	21	50	81	54	55	21	12	28	40	22	41	15	18	27	25	26	24
FBgn0004465_Su(P)	FBgn0004465	Suppressor of ref(2)P sterility	Su(P)	483	336	450	498	166	295	465	297	212	183	180	284	480	294	349	183	180	293	627	223	264	211	185	288	505	301	211
FBgn0004507_GlyP	FBgn0004507	Glycogen phosphorylase	GlyP	941	977	994	499	225	519	250	311	308	165	147	284	376	315	246	284	272	599	292	149	350	108	135	192	152	128	201
FBgn0004509_Fur1	FBgn0004509	Furin 1	Fur1	501	430	464	431	177	296	243	327	295	191	197	293	352	289	315	188	164	281	328	154	235	131	161	225	154	182	161
FBgn0004510_Ets97D	FBgn0004510	Ets at 97D	Ets97D	6	12	7	14	10	17	21	19	21	9	13	17	17	14	9	3	4	17	7	16	7	6	9	14	4	5	7
FBgn0004511_dy	FBgn0004511	dusky	dy	0	0	0	0	0	0	0	0	0	0	0	0	0	0	0	0	0	0	0	1	0	0	0	0	0	0	0
FBgn0004512_Mdr49	FBgn0004512	Multi drug resistance 49	Mdr49	706	454	893	1085	480	599	530	582	404	302	320	406	752	554	516	515	479	832	787	418	700	414	401	684	707	689	711
FBgn0004513_Mdr65	FBgn0004513	Multi drug resistance 65	Mdr65	5	0	2	1	1	1	0	2	3	2	1	2	1	1	6	1	0	2	3	0	2	0	1	3	1	2	0
FBgn0004514_Oct-TyrR	FBgn0004514	Octopamine-Tyramine receptor	Oct-TyrR	0	0	0	0	0	0	0	0	1	0	0	0	0	1	0	0	0	0	0	0	0	0	0	0	0	1	0
FBgn0004516_Gad1	FBgn0004516	Glutamic acid decarboxylase 1	Gad1	0	0	0	0	0	1	0	2	0	0	0	1	0	0	0	0	0	0	0	0	0	0	0	0	0	0	0
FBgn0004552_Akh	FBgn0004552	Adipokinetic hormone	Akh	162	112	119	625	169	221	655	128	226	150	82	135	280	352	242	227	174	298	343	67	158	175	63	189	129	264	165
FBgn0004554_Edg91	FBgn0004554	Ecdysone-dependent gene 91	Edg91	15	8	28	12	3	8	11	7	4	3	5	6	5	3	3	5	3	1	8	0	3	4	0	1	6	2	7
FBgn0004556_Dbp73D	FBgn0004556	Dead box protein 73D	Dbp73D	46	43	21	29	9	20	24	23	30	26	21	28	63	58	31	8	4	14	39	16	21	12	8	4	16	14	10
FBgn0004567_slp2	FBgn0004567	sloppy paired 2	slp2	1	0	2	1	1	2	0	0	1	0	2	0	0	0	0	0	0	0	0	0	0	0	0	0	0	1	0
FBgn0004569_aos	FBgn0004569	argos	aos	44	17	22	18	3	14	12	15	9	2	9	14	8	15	13	5	4	8	4	6	4	7	4	7	4	2	6
FBgn0004573_5-HT7	FBgn0004573	5-hydroxytryptamine (serotonin) receptor 7	5-HT7	3	1	3	3	4	5	2	2	2	5	3	1	3	8	3	2	4	9	5	0	2	0	0	1	0	1	2
FBgn0004574_Rop	FBgn0004574	Ras opposite	Rop	79	145	212	265	111	180	191	149	144	82	92	102	213	137	128	107	67	132	199	91	86	115	136	90	142	77	85
FBgn0004575_Syn	FBgn0004575	Synapsin	Syn	1	4	4	6	2	5	2	6	5	6	6	7	7	7	8	10	1	6	1	1	4	0	4	0	1	2	2
FBgn0004577_Pxd	FBgn0004577	Peroxidase	Pxd	0	0	0	0	0	0	0	0	0	0	0	0	0	0	0	0	0	0	0	0	0	0	0	0	0	0	0
FBgn0004580_Cbp53E	FBgn0004580	Calbindin 53E	Cbp53E	302	255	374	311	161	319	205	178	287	72	121	275	168	200	232	119	147	313	95	67	184	63	63	96	62	49	165
FBgn0004581_bgcn	FBgn0004581	benign gonial cell neoplasm	bgcn	1	0	0	0	0	0	1	2	0	0	0	1	1	2	0	0	0	1	0	0	0	0	0	0	0	0	1
FBgn0004583_ex	FBgn0004583	expanded	ex	23	19	22	11	1	13	7	15	15	24	15	18	25	9	17	1	0	13	2	2	15	5	5	2	7	3	9
FBgn0004584_Rrp1	FBgn0004584	Recombination repair protein 1	Rrp1	28	10	11	14	4	8	4	9	6	8	3	14	13	3	7	3	7	6	6	2	1	7	2	6	4	5	2
FBgn0004587_B52	FBgn0004587	B52	B52	797	495	562	361	152	355	261	310	319	241	218	324	539	428	383	117	119	297	277	118	244	109	146	173	125	150	217
FBgn0004588_Eig71Ea	FBgn0004588	Ecdysone-induced gene 71Ea	Eig71Ea	0	0	0	0	0	0	0	0	0	0	0	0	0	0	0	1	0	0	0	0	1	0	0	0	0	0	0
FBgn0004589_Eig71Eb	FBgn0004589	Ecdysone-induced gene 71Eb	Eig71Eb	0	0	0	0	0	0	0	0	1	0	0	0	0	0	0	0	0	0	0	0	0	0	0	0	0	0	0
FBgn0004590_Eig71Ec	FBgn0004590	Ecdysone-induced gene 71Ec	Eig71Ec	0	0	0	0	0	0	0	0	0	0	0	0	0	0	0	0	0	0	0	0	0	0	0	0	0	0	0
FBgn0004591_Eig71Ed	FBgn0004591	Ecdysone-induced gene 71Ed	Eig71Ed	0	0	0	0	0	0	0	0	0	0	0	0	0	0	0	0	0	0	0	0	0	0	0	0	0	0	0
FBgn0004592_Eig71Ee	FBgn0004592	Ecdysone-induced gene 71Ee	Eig71Ee	0	0	0	0	0	0	0	0	0	0	0	0	0	0	0	0	0	0	0	0	0	0	0	0	0	0	0
FBgn0004593_Eig71Ef	FBgn0004593	Ecdysone-induced gene 71Ef	Eig71Ef	0	0	0	0	0	0	0	0	0	0	0	0	0	0	0	0	0	0	0	0	0	0	0	0	0	0	0
FBgn0004594_Eig71Eg	FBgn0004594	Ecdysone-induced gene 71Eg	Eig71Eg	0	0	0	0	0	0	0	0	0	0	0	0	0	0	0	0	0	0	0	0	0	0	0	0	0	0	0
FBgn0004595_pros	FBgn0004595	prospero	pros	49	50	58	41	10	27	20	45	44	30	23	37	31	48	37	14	16	27	15	19	29	11	15	14	9	7	16
FBgn0004597_CycC	FBgn0004597	Cyclin C	CycC	79	65	68	73	34	56	58	75	49	39	37	46	99	69	70	35	29	46	72	24	58	32	24	49	37	44	57
FBgn0004598_Fur2	FBgn0004598	Furin 2	Fur2	26	31	48	24	4	9	11	13	11	8	7	12	7	1	13	7	4	13	6	3	9	4	3	4	2	3	8
FBgn0004606_zfh1	FBgn0004606	Zn finger homeodomain 1	zfh1	3	2	7	6	1	7	8	8	4	6	0	12	0	2	1	0	1	2	2	0	0	0	1	2	1	2	4
FBgn0004607_zfh2	FBgn0004607	Zn finger homeodomain 2	zfh2	16	15	6	5	4	25	7	11	21	9	13	14	19	12	19	4	2	13	1	3	8	1	6	4	4	2	7
FBgn0004611_Plc21C	FBgn0004611	Phospholipase C at 21C	Plc21C	185	119	141	85	27	80	40	68	77	27	38	79	61	56	60	30	21	80	29	24	68	19	19	34	16	6	28
FBgn0004618_gl	FBgn0004618	glass	gl	0	1	0	1	0	1	0	0	0	0	0	0	0	0	0	0	0	0	0	0	0	0	0	0	0	0	0
FBgn0004619_GluRIA	FBgn0004619	Glutamate receptor IA	GluRIA	0	0	0	0	0	1	1	0	0	1	0	0	2	1	0	0	0	0	0	0	1	0	0	0	0	0	0
FBgn0004620_GluRIIA	FBgn0004620	Glutamate receptor IIA	GluRIIA	12	28	36	18	6	16	7	8	8	1	2	10	9	11	12	3	2	7	22	6	13	2	3	3	4	3	4
FBgn0004622_TkR99D	FBgn0004622	Tachykinin-like receptor at 99D	TkR99D	46	58	52	12	4	15	11	7	13	5	3	13	9	12	19	3	9	19	8	4	12	4	4	6	3	9	8
FBgn0004623_Gbeta76C	FBgn0004623	G protein beta-subunit 76C	Gbeta76C	0	0	0	0	0	0	1	1	0	0	0	0	1	0	0	0	0	0	0	2	0	0	0	0	1	0	0
FBgn0004629_Cys	FBgn0004629	Cystatin-like	Cys	3054	2237	3472	2665	838	1355	2933	1204	953	541	534	703	1143	997	794	921	861	1057	1707	820	755	622	666	710	1622	1137	799
FBgn0004635_rho	FBgn0004635	rhomboid	rho	59	36	58	205	53	92	112	204	72	114	65	114	58	69	54	42	7	9	54	11	8	22	10	27	29	26	11
FBgn0004636_Rap1	FBgn0004636	Rap1 GTPase	Rap1	1027	869	901	756	304	632	548	650	568	453	354	576	1214	969	772	287	247	549	833	236	444	235	252	340	324	391	548
FBgn0004638_drk	FBgn0004638	downstream of receptor kinase	drk	218	152	177	198	83	156	131	177	171	118	109	198	211	175	159	70	68	143	126	56	129	44	63	81	45	43	89
FBgn0004643_Zw10	FBgn0004643	Zeste-white 10	Zw10	36	33	23	42	11	30	33	40	20	13	25	27	55	29	34	15	16	27	47	18	33	22	20	32	39	36	22
FBgn0004644_hh	FBgn0004644	hedgehog	hh	75	73	81	144	41	40	123	95	71	58	56	84	191	120	118	68	31	58	139	35	47	67	53	54	93	119	87
FBgn0004646_ogre	FBgn0004646	optic ganglion reduced	ogre	377	302	443	224	103	266	90	190	238	123	162	219	181	142	163	79	77	213	62	87	127	41	74	68	24	22	68
FBgn0004647_N	FBgn0004647	Notch	N	34	40	42	69	20	55	34	58	63	35	35	72	85	57	66	18	16	50	28	24	31	13	31	26	16	19	18
FBgn0004648_svr	FBgn0004648	silver	svr	296	215	304	305	129	209	141	238	200	164	175	219	260	207	242	125	115	216	104	103	197	138	116	160	85	112	137
FBgn0004649_yl	FBgn0004649	yolkless	yl	0	2	0	1	0	0	2	1	0	0	0	0	0	0	0	0	0	0	20	6	0	0	3	1	17	1	0
FBgn0004650_fs(1)N	FBgn0004650	female sterile (1) Nasrat	fs(1)N	0	0	0	0	0	0	0	0	0	0	0	0	0	0	0	0	0	0	1	1	0	0	0	0	5	1	0
FBgn0004652_fru	FBgn0004652	fruitless	fru	17	29	21	58	31	56	36	47	71	52	31	67	101	89	75	36	25	78	43	21	62	30	28	34	28	22	69
FBgn0004654_Pgd	FBgn0004654	Phosphogluconate dehydrogenase	Pgd	3801	3131	4544	1135	279	546	436	370	320	180	197	401	285	265	340	621	477	763	500	385	500	521	534	708	948	562	546
FBgn0004655_wapl	FBgn0004655	wings apart-like	wapl	92	99	83	102	41	59	30	82	64	60	61	61	72	71	68	35	28	60	35	44	42	39	28	55	27	26	42
FBgn0004656_fs(1)h	FBgn0004656	female sterile (1) homeotic	fs(1)h	964	853	900	746	399	628	513	652	656	548	463	683	1081	1025	938	329	278	631	486	234	568	222	277	331	266	242	437
FBgn0004657_mys	FBgn0004657	myospheroid	mys	390	556	732	1024	399	698	488	625	465	395	326	429	593	629	383	274	166	398	245	152	238	145	146	124	128	213	235
FBgn0004666_sim	FBgn0004666	single-minded	sim	0	0	0	0	0	0	0	0	0	0	0	0	0	0	0	0	0	0	0	0	0	0	0	0	0	0	0
FBgn0004687_Mlc-c	FBgn0004687	Myosin light chain cytoplasmic	Mlc-c	711	3255	4868	8890	2362	4725	5348	4232	3108	2600	2382	2236	5131	3454	3639	3590	2560	3742	6906	3139	2376	3196	3681	1184	3873	2586	2336
FBgn0004698_Xpc	FBgn0004698	Xeroderma pigmentosum, complementation group C	Xpc	86	72	101	65	30	85	51	91	110	72	79	91	92	69	79	23	25	63	30	28	59	15	23	35	22	20	28
FBgn0004777_Ccp84Ag	FBgn0004777	Ccp84Ag	Ccp84Ag	0	1	1	1	0	1	1	0	0	0	1	0	0	2	0	0	0	0	1	1	0	0	0	0	0	0	1
FBgn0004778_Ccp84Af	FBgn0004778	Ccp84Af	Ccp84Af	0	0	0	0	0	0	0	0	0	0	0	0	0	0	0	0	0	0	0	0	0	0	0	0	0	0	0
FBgn0004779_Ccp84Ae	FBgn0004779	Ccp84Ae	Ccp84Ae	0	0	0	0	0	0	0	0	0	0	0	0	0	0	0	0	0	0	0	0	0	0	0	0	0	0	0
FBgn0004780_Ccp84Ad	FBgn0004780	Ccp84Ad	Ccp84Ad	0	0	0	0	0	0	0	0	0	0	0	0	0	0	0	0	0	0	0	0	0	0	0	0	0	0	0
FBgn0004781_Ccp84Ac	FBgn0004781	Ccp84Ac	Ccp84Ac	0	0	0	0	0	0	0	0	0	0	0	0	0	0	0	0	0	0	0	0	0	0	0	0	0	0	0
FBgn0004782_Ccp84Ab	FBgn0004782	Ccp84Ab	Ccp84Ab	1	0	0	0	0	0	0	0	0	0	0	0	0	0	0	0	0	0	0	0	0	0	0	0	0	0	0
FBgn0004783_Ccp84Aa	FBgn0004783	Ccp84Aa	Ccp84Aa	0	0	0	0	0	0	0	0	0	0	0	0	0	0	0	0	0	0	0	0	0	0	0	0	0	0	0
FBgn0004784_inaC	FBgn0004784	inactivation no afterpotential C	inaC	0	0	0	0	0	0	0	0	0	0	0	0	0	0	0	0	0	0	0	0	0	0	0	0	0	0	0
FBgn0004795_retn	FBgn0004795	retained	retn	112	71	108	58	36	69	25	72	67	33	33	49	34	25	39	27	30	72	20	29	54	19	19	20	13	15	27
FBgn0004797_mdy	FBgn0004797	midway	mdy	42	25	43	44	16	35	36	34	27	8	12	25	23	21	18	14	24	33	47	22	19	15	21	22	42	24	27
FBgn0004811_fs(2)ltoPP43	FBgn0004811	female sterile (2) ltoPP43	fs(2)ltoPP43	85	76	69	103	36	59	65	64	56	35	40	60	70	56	49	43	40	66	96	53	53	47	34	57	66	56	48
FBgn0004828_His3.3B	FBgn0004828	Histone H3.3B	His3.3B	2719	2336	2545	4185	1715	2070	2596	3408	2155	1939	1958	2159	3422	2902	2529	2100	1782	2063	2768	1881	2224	1973	1910	1812	1872	1714	1365
FBgn0004832_Xpac	FBgn0004832	Xeroderma pigmentosum group A-like	Xpac	13	4	17	12	7	9	12	4	1	6	2	8	9	15	12	3	6	11	7	4	4	4	6	8	6	3	3
FBgn0004837_Su(H)	FBgn0004837	Suppressor of Hairless	Su(H)	8	3	15	12	2	12	12	6	11	9	11	8	12	18	12	8	3	10	8	6	8	5	4	10	2	7	9
FBgn0004838_Hrb27C	FBgn0004838	Heterogeneous nuclear ribonucleoprotein at 27C	Hrb27C	3241	2582	2859	3029	1267	1889	1566	2473	1778	1535	1314	1807	2786	2204	2018	1371	1194	1943	2072	1327	1802	1400	1328	1420	1307	1403	1418
FBgn0004839_otk	FBgn0004839	off-track	otk	9	9	8	17	3	13	6	7	10	6	5	6	4	5	7	3	3	7	2	3	12	2	2	4	2	0	4
FBgn0004841_TkR86C	FBgn0004841	Tachykinin-like receptor at 86C	TkR86C	0	0	0	1	0	0	0	1	1	0	0	0	0	1	0	0	0	0	0	0	0	0	0	0	0	0	0
FBgn0004842_RYa-R	FBgn0004842	RYamide receptor	RYa-R	4	7	5	6	1	1	4	1	2	0	1	5	2	1	3	3	0	0	2	1	3	1	0	2	1	2	1
FBgn0004852_Ac76E	FBgn0004852	Adenylyl cyclase 76E	Ac76E	43	43	65	32	20	37	23	26	36	8	12	23	29	18	19	21	15	47	29	8	24	11	14	18	8	9	13
FBgn0004854_B-H2	FBgn0004854	BarH2	B-H2	0	0	0	1	0	0	0	0	0	0	0	0	0	0	0	0	0	0	0	0	0	0	0	0	0	0	0
FBgn0004855_RpII15	FBgn0004855	RNA polymerase II 15kD subunit	RpII15	81	65	76	43	18	59	49	56	41	29	28	55	60	54	52	35	25	45	25	28	45	14	29	29	14	15	41
FBgn0004856_Bx42	FBgn0004856	Bx42	Bx42	124	107	132	240	73	106	235	109	95	97	62	96	184	147	151	77	78	79	124	91	95	93	72	103	166	129	91
FBgn0004858_elB	FBgn0004858	elbow B	elB	118	92	95	199	88	139	95	181	145	141	95	143	116	115	102	71	44	108	76	58	88	45	49	62	24	33	61
FBgn0004859_ci	FBgn0004859	cubitus interruptus	ci	6	2	3	2	2	5	0	1	2	0	0	1	0	2	0	1	2	2	0	0	1	1	0	0	0	0	1
FBgn0004860_ph-d	FBgn0004860	polyhomeotic distal	ph-d	22	21	18	12	9	16	10	12	14	13	5	14	23	7	16	2	5	19	10	7	10	4	4	8	7	2	7
FBgn0004861_ph-p	FBgn0004861	polyhomeotic proximal	ph-p	67	33	33	28	10	31	8	30	23	23	16	17	32	22	20	15	10	21	5	6	19	8	8	9	6	0	13
FBgn0004862_bap	FBgn0004862	bagpipe	bap	4	1	1	1	0	1	7	0	2	1	0	2	0	0	1	0	2	0	3	0	5	1	0	1	0	0	0
FBgn0004863_C15	FBgn0004863	C15	C15	0	0	0	0	0	0	0	0	0	0	0	0	0	0	0	0	0	0	0	0	0	0	0	0	0	0	0
FBgn0004864_hop	FBgn0004864	hopscotch	hop	42	40	48	36	19	28	19	35	27	23	22	33	40	41	41	5	10	31	6	6	32	10	11	8	7	12	15
FBgn0004865_Eip78C	FBgn0004865	Ecdysone-induced protein 78C	Eip78C	25	15	29	65	13	33	23	41	14	14	10	29	19	29	16	13	7	5	3	6	7	4	3	4	5	2	6
FBgn0004867_RpS2	FBgn0004867	Ribosomal protein S2	RpS2	8290	6704	8523	11335	3625	5562	20060	7941	6058	5040	5365	7096	12314	10978	12624	4497	4497	6154	8562	5516	5901	5374	5686	6080	14124	9240	5722
FBgn0004868_Gdi	FBgn0004868	GDP dissociation inhibitor	Gdi	1907	1582	1925	2923	1168	1588	1406	1766	1153	1060	949	1257	1261	1277	1263	1374	1195	1606	1089	1291	1177	1247	1165	1625	1488	1280	1034
FBgn0004870_bab1	FBgn0004870	bric a brac 1	bab1	15	6	14	17	3	5	7	6	8	4	3	5	7	2	7	2	5	7	3	4	5	1	0	1	8	2	4
FBgn0004872_piwi	FBgn0004872	piwi	piwi	0	0	0	0	0	0	0	0	0	0	0	0	0	0	0	0	0	0	1	0	0	0	0	0	1	0	0
FBgn0004875_enc	FBgn0004875	encore	enc	112	85	97	81	36	56	32	66	59	49	52	57	70	68	71	38	35	46	40	31	59	30	40	44	19	15	29
FBgn0004876_cdi	FBgn0004876	center divider	cdi	886	692	899	1005	460	840	557	822	932	645	660	890	1330	1220	1142	545	370	1050	545	513	1071	510	470	682	320	549	1055
FBgn0004878_cas	FBgn0004878	castor	cas	0	3	2	1	0	4	2	2	1	1	2	5	1	2	5	0	0	1	0	0	3	1	1	0	0	0	2
FBgn0004880_scrt	FBgn0004880	scratch	scrt	0	2	1	2	0	1	0	2	1	2	2	0	2	2	2	0	0	0	0	1	1	4	1	0	0	2	0
FBgn0004882_orb	FBgn0004882	oo18 RNA-binding protein	orb	8	4	4	2	1	0	0	2	1	0	0	0	0	1	0	0	0	1	0	0	0	0	0	0	0	0	1
FBgn0004885_tok	FBgn0004885	tolkin	tok	19	19	10	4	0	4	4	3	2	1	0	3	5	2	1	1	0	4	1	0	0	3	0	1	0	0	2
FBgn0004888_Scsalpha	FBgn0004888	Succinyl coenzyme A synthetase alpha subunit	Scsalpha	1408	1156	1476	1185	431	658	1317	637	532	399	363	576	894	782	731	511	521	753	812	521	619	470	485	620	1205	751	588
FBgn0004889_tws	FBgn0004889	twins	tws	195	127	170	110	53	107	87	123	84	107	73	106	150	136	115	47	65	116	66	44	86	28	36	49	36	28	51
FBgn0004892_sob	FBgn0004892	sister of odd and bowl	sob	44	29	30	27	27	17	28	32	19	21	21	30	34	14	33	22	18	21	24	21	33	18	9	26	23	18	19
FBgn0004893_bowl	FBgn0004893	brother of odd with entrails limited	bowl	87	50	70	129	45	77	61	102	76	63	53	108	91	75	108	40	45	78	69	40	62	34	52	52	35	30	30
FBgn0004895_fd64A	FBgn0004895	forkhead domain 64A	fd64A	2	1	1	0	1	0	1	0	1	0	1	1	1	1	1	0	0	1	2	0	1	0	0	2	0	0	0
FBgn0004896_fd59A	FBgn0004896	forkhead domain 59A	fd59A	0	0	0	0	0	0	0	0	0	0	0	0	0	0	0	0	0	0	0	0	2	0	0	0	0	0	0
FBgn0004897_fd96Ca	FBgn0004897	forkhead domain 96Ca	fd96Ca	0	0	0	0	0	0	0	0	0	0	0	0	0	0	0	0	0	0	0	0	0	0	0	0	0	0	0
FBgn0004898_fd96Cb	FBgn0004898	forkhead domain 96Cb	fd96Cb	0	0	0	0	0	0	0	0	0	0	0	0	0	1	0	0	0	0	0	0	0	2	0	0	0	0	0
FBgn0004901_Prat	FBgn0004901	Phosphoribosylamidotransferase	Prat	54	80	77	51	16	18	24	35	24	26	15	20	37	41	36	20	15	23	36	18	42	22	19	28	40	24	25
FBgn0004903_Rb97D	FBgn0004903	Ribonuclear protein at 97D	Rb97D	90	62	64	88	29	52	47	58	59	47	50	71	95	97	74	35	41	54	61	39	46	43	42	53	21	40	40
FBgn0004907_14-3-3zeta	FBgn0004907	14-3-3zeta	14-3-3zeta	16233	10152	11650	10170	3729	7370	3887	7302	5201	4945	4622	6339	6059	5187	5355	3635	2851	6139	2816	2672	5336	2810	2695	3389	1657	1688	3511
FBgn0004908_Arl2	FBgn0004908	ADP ribosylation factor-like 2	Arl2	129	81	124	198	53	88	142	101	56	64	51	81	114	84	76	69	47	72	147	67	65	75	54	75	81	93	39
FBgn0004910_Eip63F-1	FBgn0004910	Ecdysone-induced protein 63F 1	Eip63F-1	291	234	367	521	197	386	394	374	326	230	233	354	496	387	335	203	187	379	390	172	305	136	174	190	164	160	332
FBgn0004911_Eip63F-2	FBgn0004911	Ecdysone-induced protein 63F 2	Eip63F-2	21	16	21	15	11	20	15	7	13	4	6	10	10	13	10	4	4	15	12	8	15	11	7	14	8	6	11
FBgn0004913_Gnf1	FBgn0004913	Germ line transcription factor 1	Gnf1	67	36	41	57	23	34	27	37	31	29	21	32	37	30	31	36	26	25	15	13	28	20	16	18	10	22	18
FBgn0004914_Hnf4	FBgn0004914	Hepatocyte nuclear factor 4	Hnf4	415	384	540	639	288	540	326	611	495	410	367	628	792	530	564	307	260	567	562	291	476	240	257	362	274	226	390
FBgn0004915_TfIIB	FBgn0004915	Transcription factor IIB	TfIIB	44	39	56	58	16	31	31	47	31	31	17	31	42	40	36	26	24	31	24	26	34	23	24	37	24	41	29
FBgn0004919_gol	FBgn0004919	goliath	gol	16	13	32	32	14	33	37	37	24	27	28	33	48	36	23	16	15	33	21	17	18	9	10	11	9	8	12
FBgn0004921_Ggamma1	FBgn0004921	G protein gamma 1	Ggamma1	488	518	509	921	371	412	609	656	453	372	354	386	637	591	445	388	360	446	408	404	424	385	336	333	360	464	326
FBgn0004924_Top1	FBgn0004924	Topoisomerase 1	Top1	521	356	334	256	139	249	118	249	223	180	170	200	245	229	202	124	88	243	100	117	206	99	103	165	72	104	127
FBgn0004926_eIF-2beta	FBgn0004926	Eukaryotic initiation factor 2beta	eIF-2beta	2118	1361	1622	1111	557	937	546	1032	849	808	758	1073	1141	950	1114	552	464	1003	469	658	977	645	640	873	424	533	873
FBgn0004956_upd1	FBgn0004956	unpaired 1	upd1	1	0	1	0	0	0	0	0	0	1	0	0	0	0	1	0	0	1	0	0	0	0	0	0	0	0	0
FBgn0004957_por	FBgn0004957	porcupine	por	25	15	14	22	10	23	9	17	16	6	4	14	26	12	22	11	11	9	19	13	14	8	15	14	14	10	12
FBgn0004959_phm	FBgn0004959	phantom	phm	0	0	0	0	0	0	0	0	0	0	0	0	0	0	0	0	0	0	0	0	0	0	0	0	0	0	0
FBgn0005198_gig	FBgn0005198	gigas	gig	12	6	9	13	1	10	8	7	5	12	6	17	15	9	9	4	4	16	14	5	9	3	7	5	4	3	13
FBgn0005278_Sam-S	FBgn0005278	S-adenosylmethionine Synthetase	Sam-S	254	295	333	210	88	204	176	255	302	187	176	269	356	272	252	100	47	178	165	107	186	97	122	111	65	81	152
FBgn0005322_nmd	FBgn0005322	no mitochondrial derivative	nmd	373	232	306	188	94	185	160	185	142	130	106	197	193	176	165	85	82	151	133	93	125	105	96	151	94	92	119
FBgn0005355_Su(fu)	FBgn0005355	Suppressor of fused	Su(fu)	15	16	8	28	9	9	18	12	6	11	12	14	17	21	10	13	11	15	13	14	10	11	6	14	14	17	14
FBgn0005386_ash1	FBgn0005386	absent, small, or homeotic discs 1	ash1	25	31	57	28	10	36	17	23	50	43	30	39	48	34	18	15	5	30	4	8	20	2	7	3	6	4	10
FBgn0005390_fs(1)M3	FBgn0005390	female sterile (1) M3	fs(1)M3	0	0	1	1	0	0	0	0	0	0	0	0	0	0	0	0	0	0	1	1	0	0	1	0	2	0	0
FBgn0005391_Yp2	FBgn0005391	Yolk protein 2	Yp2	3	9	11	75	38	8	67	43	0	30	45	9	38	17	13	52	23	30	53	41	18	50	35	9	64	56	17
FBgn0005411_U2af50	FBgn0005411	U2 small nuclear riboprotein auxiliary factor 50	U2af50	121	75	73	129	57	94	178	105	70	66	81	112	206	113	113	65	35	77	163	66	80	53	74	83	125	103	55
FBgn0005427_ewg	FBgn0005427	erect wing	ewg	99	84	114	165	66	141	82	164	153	94	122	119	192	171	142	71	68	124	93	96	107	76	90	114	53	68	78
FBgn0005533_RpS17	FBgn0005533	Ribosomal protein S17	RpS17	13712	12402	15267	22681	8171	10249	28349	14810	10412	9562	9781	10547	19175	17558	17446	9704	9733	11783	12656	11451	11996	9832	9796	11188	23709	15403	9957
FBgn0005536_Mbs	FBgn0005536	Myosin binding subunit	Mbs	228	196	301	257	80	223	130	162	205	103	112	219	173	171	162	81	67	158	64	54	102	47	46	69	49	33	84
FBgn0005558_ey	FBgn0005558	eyeless	ey	0	0	0	0	0	0	0	0	0	0	0	0	1	0	0	0	0	1	0	0	1	0	0	0	0	0	1
FBgn0005561_sv	FBgn0005561	shaven	sv	0	0	0	3	2	0	2	1	0	1	0	0	0	1	0	0	0	0	1	0	1	0	0	0	1	0	0
FBgn0005564_Shal	FBgn0005564	Shaker cognate l	Shal	32	25	50	28	8	21	16	17	26	7	16	25	12	12	26	17	8	24	16	5	16	9	4	21	6	6	9
FBgn0005585_Calr	FBgn0005585	Calreticulin	Calr	6115	4008	4229	3341	1246	2610	3040	2182	1720	1684	1291	2384	4351	3050	3750	1611	1486	2781	5422	1397	2696	1824	1560	2472	2487	1998	3031
FBgn0005586_Rab3	FBgn0005586	Rab3	Rab3	5	3	19	5	0	4	0	5	3	6	3	6	3	4	3	2	0	5	4	1	6	2	1	4	2	0	4
FBgn0005590_scw	FBgn0005590	screw	scw	0	0	0	0	0	0	0	0	0	0	1	0	0	0	0	0	0	0	0	0	0	0	0	0	0	0	0
FBgn0005592_btl	FBgn0005592	breathless	btl	58	73	50	39	22	18	46	15	16	12	14	17	31	24	25	17	12	22	22	20	18	6	21	12	25	8	12
FBgn0005593_RpL7	FBgn0005593	Ribosomal protein L7	RpL7	10362	9405	11657	12132	4876	7805	12130	10372	8211	7026	6723	8701	14942	13975	12303	5546	5214	9194	7117	6565	8143	4969	5231	5974	5158	7397	6508
FBgn0005596_yem	FBgn0005596	yemanuclein	yem	26	24	24	25	14	19	8	25	20	19	12	13	31	15	21	9	12	23	18	9	10	17	14	12	5	17	4
FBgn0005612_Sox14	FBgn0005612	Sox box protein 14	Sox14	31	38	50	35	15	34	26	31	24	23	23	37	34	21	21	12	18	32	16	18	14	6	13	14	12	9	16
FBgn0005613_Sox15	FBgn0005613	Sox box protein 15	Sox15	0	0	0	0	0	0	0	0	0	0	0	0	0	0	0	0	0	0	0	0	0	0	0	0	0	0	0
FBgn0005614_trpl	FBgn0005614	transient receptor potential-like	trpl	14	3	8	6	3	8	2	1	4	1	1	2	3	2	3	2	1	4	0	0	3	0	0	2	1	0	1
FBgn0005616_msl-2	FBgn0005616	male-specific lethal 2	msl-2	6	11	6	9	3	10	11	3	8	3	5	11	10	9	7	4	3	6	7	5	5	1	7	6	6	2	6
FBgn0005617_msl-1	FBgn0005617	male-specific lethal 1	msl-1	104	62	85	52	18	63	27	67	70	59	48	69	91	58	80	16	30	68	36	24	49	8	12	24	13	13	24
FBgn0005619_Hdc	FBgn0005619	Histidine decarboxylase	Hdc	1	0	0	1	0	0	0	0	0	0	0	0	0	0	0	0	0	0	0	1	0	0	0	1	0	0	0
FBgn0005624_Psc	FBgn0005624	Posterior sex combs	Psc	133	113	93	43	34	75	36	53	51	40	36	58	62	72	83	26	15	42	18	11	41	13	16	15	19	24	35
FBgn0005626_ple	FBgn0005626	pale	ple	153	312	374	129	46	213	105	117	282	73	93	224	292	220	277	45	43	196	59	23	140	16	44	39	34	30	173
FBgn0005631_robo1	FBgn0005631	roundabout 1	robo1	19	8	13	11	4	13	21	20	11	14	13	31	24	22	13	3	4	13	17	6	11	3	5	4	12	4	3
FBgn0005632_faf	FBgn0005632	fat facets	faf	257	198	212	220	85	213	106	200	185	112	158	233	249	217	205	86	75	211	108	73	152	53	72	75	66	48	102
FBgn0005633_fln	FBgn0005633	flightin	fln	0	0	0	0	0	0	0	0	0	0	0	0	0	1	0	0	0	0	0	0	0	0	0	0	0	0	0
FBgn0005636_nvy	FBgn0005636	nervy	nvy	21	17	31	12	6	9	3	6	8	2	1	12	6	9	8	2	4	6	5	6	4	1	5	7	3	4	7
FBgn0005638_slbo	FBgn0005638	slow border cells	slbo	16	32	3	6	1	2	2	8	2	1	1	7	3	0	0	0	0	0	2	0	0	0	1	0	0	0	0
FBgn0005640_Eip63E	FBgn0005640	Ecdysone-induced protein 63E	Eip63E	373	360	382	184	89	244	89	225	234	153	155	191	203	203	183	93	65	213	111	79	147	52	80	108	44	56	103
FBgn0005642_wdn	FBgn0005642	wings down	wdn	36	34	47	38	17	39	36	45	40	11	29	43	79	50	35	28	14	28	54	23	34	24	20	37	19	14	18
FBgn0005648_Pabp2	FBgn0005648	Pabp2	Pabp2	274	216	200	207	66	135	218	160	118	112	109	152	253	194	209	105	70	148	194	50	151	84	72	105	122	86	106
FBgn0005649_Rox8	FBgn0005649	Rox8	Rox8	435	355	410	358	178	322	240	285	241	194	179	308	509	346	362	172	129	279	377	128	276	105	130	174	147	117	231
FBgn0005654_Orc3	FBgn0005654	Origin recognition complex subunit 3	Orc3	0	0	0	0	0	0	0	0	0	0	0	0	0	0	0	0	0	0	0	0	0	0	0	0	0	0	0
FBgn0005655_PCNA	FBgn0005655	Proliferating cell nuclear antigen	PCNA	370	249	198	34	11	27	52	45	19	23	18	19	30	12	25	17	9	38	22	6	17	9	9	12	16	8	9
FBgn0005658_Ets65A	FBgn0005658	Ets at 65A	Ets65A	0	0	0	1	0	0	1	1	0	0	0	2	0	0	0	1	1	0	1	0	0	0	0	0	0	2	1
FBgn0005659_Ets98B	FBgn0005659	Ets at 98B	Ets98B	15	14	23	22	9	8	8	8	6	2	7	10	4	2	8	4	6	11	4	6	7	4	3	6	3	5	6
FBgn0005660_Ets21C	FBgn0005660	Ets at 21C	Ets21C	211	128	174	56	27	47	40	37	39	27	18	58	31	39	55	22	13	16	30	17	15	12	18	19	13	14	7
FBgn0005664_Crys	FBgn0005664	Crystallin	Crys	91	60	73	503	170	316	236	417	150	150	101	250	114	156	124	94	78	75	123	25	50	38	50	90	47	67	58
FBgn0005666_bt	FBgn0005666	bent	bt	2693	2452	3033	1043	429	1961	520	447	1494	277	373	1080	502	690	939	378	255	1714	119	187	505	93	135	136	101	99	487
FBgn0005670_Cyp4d1	FBgn0005670	Cytochrome P450-4d1	Cyp4d1	28	59	70	1278	562	740	711	524	387	289	296	359	485	323	283	664	640	831	528	608	564	464	523	610	569	719	477
FBgn0005671_Vha55	FBgn0005671	Vacuolar H[+]-ATPase 55kD subunit	Vha55	4610	3990	5180	3097	1538	3550	1770	2439	2600	1858	1641	2538	3482	2721	2369	2197	2117	4567	2137	2066	3044	1408	1539	2579	1391	1501	2695
FBgn0005672_spi	FBgn0005672	spitz	spi	57	45	55	106	35	44	99	81	59	43	66	52	81	121	107	35	28	42	54	48	42	25	37	37	26	44	36
FBgn0005674_GluProRS	FBgn0005674	Glutamyl-prolyl-tRNA synthetase	GluProRS	161	122	160	71	40	79	56	78	82	48	59	61	95	98	75	18	19	86	41	32	54	19	26	29	15	32	49
FBgn0005677_dac	FBgn0005677	dachshund	dac	2	1	0	3	2	1	1	3	3	0	1	2	4	2	0	0	0	1	1	3	1	0	0	0	0	1	1
FBgn0005683_pie	FBgn0005683	pineapple eye	pie	9	6	6	5	1	6	1	5	5	5	0	2	0	4	7	0	0	1	2	1	0	1	1	1	0	2	0
FBgn0005694_Aef1	FBgn0005694	Adult enhancer factor 1	Aef1	158	117	120	91	18	84	25	74	86	75	57	94	112	58	84	29	10	66	28	28	74	22	20	32	12	15	24
FBgn0005695_gcl	FBgn0005695	germ cell-less	gcl	50	26	51	61	24	42	27	50	34	27	20	37	47	38	31	24	17	47	19	26	39	11	21	28	18	19	26
FBgn0005696_DNApol-alpha73	FBgn0005696	DNA polymerase alpha 73kD	DNApol-alpha73	25	20	14	2	1	3	4	4	0	3	3	3	6	5	7	2	1	4	1	1	2	0	3	1	4	3	0
FBgn0005771_noc	FBgn0005771	no ocelli	noc	280	214	204	309	113	138	132	229	152	135	138	170	202	191	173	128	106	145	105	133	136	132	125	137	88	90	129
FBgn0005775_Con	FBgn0005775	Connectin	Con	3	3	3	6	0	1	2	3	1	1	2	2	0	1	1	3	0	3	2	0	4	2	0	1	0	0	2
FBgn0005777_PpD3	FBgn0005777	Protein phosphatase D3	PpD3	244	217	296	181	86	180	137	174	161	124	89	162	186	120	138	85	64	151	163	65	138	66	83	111	78	64	80
FBgn0005778_PpD5	FBgn0005778	Protein phosphatase D5	PpD5	0	0	0	0	0	0	0	0	0	0	0	0	0	0	0	0	0	0	0	0	0	0	0	0	0	0	0
FBgn0005779_PpD6	FBgn0005779	Protein phosphatase D6	PpD6	0	0	0	0	0	0	0	0	0	0	0	0	0	0	0	0	0	0	0	0	0	0	0	0	0	0	0
FBgn0008635_betaCOP	FBgn0008635	Coat Protein (coatomer) beta	betaCOP	207	174	262	174	70	105	149	119	97	84	72	107	212	152	157	84	74	135	130	98	127	97	88	125	128	176	161
FBgn0008636_hbn	FBgn0008636	homeobrain	hbn	0	1	1	0	1	4	1	0	1	1	0	2	2	2	0	0	1	0	0	0	0	2	2	0	1	0	0
FBgn0008646_E5	FBgn0008646	E5	E5	4	4	7	4	0	4	6	7	2	4	4	4	8	5	0	0	2	1	10	3	0	2	2	2	4	3	0
FBgn0008651_lbl	FBgn0008651	ladybird late	lbl	0	1	2	2	0	0	0	0	0	0	0	0	0	0	0	1	0	0	0	0	0	0	0	0	0	0	0
FBgn0010014_CanB	FBgn0010014	Calcineurin B	CanB	4	7	4	8	3	2	7	4	5	0	3	3	8	5	4	2	2	1	4	3	6	0	1	5	6	3	6
FBgn0010015_CanA1	FBgn0010015	Calcineurin A1	CanA1	5	5	10	3	3	1	6	4	4	0	0	4	1	6	4	1	1	9	5	1	2	0	1	4	1	0	3
FBgn0010019_Cyp4g1	FBgn0010019	Cytochrome P450-4g1	Cyp4g1	2	6	39	14	2	7	15	64	1	64	11	5	5	0	6	100	35	53	6	7	7	1	2	11	16	4	2
FBgn0010038_GstD2	FBgn0010038	Glutathione S transferase D2	GstD2	362	242	1092	209	49	439	102	40	15	21	20	38	26	11	9	98	74	86	253	61	55	65	36	180	189	139	136
FBgn0010039_GstD3	FBgn0010039	Glutathione S transferase D3	GstD3	52	104	175	68	22	37	30	26	15	11	9	22	29	24	16	39	24	29	45	10	22	19	22	23	23	16	9
FBgn0010040_GstD4	FBgn0010040	Glutathione S transferase D4	GstD4	34	19	32	9	5	9	7	3	1	4	1	4	1	6	1	6	6	5	8	4	5	7	6	7	6	6	10
FBgn0010041_GstD5	FBgn0010041	Glutathione S transferase D5	GstD5	94	260	620	252	75	179	180	57	44	29	22	37	54	38	37	138	118	136	184	63	72	79	84	59	305	155	116
FBgn0010042_GstD6	FBgn0010042	Glutathione S transferase D6	GstD6	3	3	4	1	0	1	1	1	0	0	0	0	0	1	0	0	1	1	1	0	0	0	0	0	0	0	2
FBgn0010043_GstD7	FBgn0010043	Glutathione S transferase D7	GstD7	120	70	134	456	149	191	187	53	55	32	48	63	72	48	53	232	308	210	181	93	98	97	80	159	448	222	154
FBgn0010044_GstD8	FBgn0010044	Glutathione S transferase D8	GstD8	29	20	44	149	48	82	107	61	17	37	48	64	26	19	46	57	85	79	91	16	27	20	26	66	82	46	34
FBgn0010051_Itp-r83A	FBgn0010051	Inositol 1,4,5,-tris-phosphate receptor	Itp-r83A	76	84	74	77	30	62	49	56	67	41	39	76	77	63	56	18	18	47	25	16	50	17	15	24	23	9	28
FBgn0010052_Jhe	FBgn0010052	Juvenile hormone esterase	Jhe	11	12	3	6	2	0	3	1	0	0	0	1	0	0	0	4	3	3	0	0	0	0	0	0	0	0	0
FBgn0010053_Jheh1	FBgn0010053	Juvenile hormone epoxide hydrolase 1	Jheh1	183	156	385	933	404	674	614	519	463	390	369	642	844	789	687	576	586	869	672	712	745	584	625	780	959	828	805
FBgn0010078_RpL23	FBgn0010078	Ribosomal protein L23	RpL23	24768	15341	20927	44996	12396	16581	85065	23841	16590	13786	14881	22789	33214	28852	36552	14598	14829	16693	30366	16550	16949	18106	19382	21991	76552	27758	17452
FBgn0010097_gammaTub37C	FBgn0010097	gamma-Tubulin at 37C	gammaTub37C	0	0	0	0	0	0	0	0	0	0	0	0	0	0	0	0	0	0	0	0	0	0	0	0	4	0	0
FBgn0010100_Acon	FBgn0010100	Aconitase	Acon	2220	2770	3757	1804	770	2145	870	1273	1438	1066	955	1383	2144	1775	1595	1132	1198	2941	920	1025	1645	676	823	957	680	751	1171
FBgn0010105_comm	FBgn0010105	commissureless	comm	11	23	22	5	6	19	6	12	10	4	6	17	13	5	8	4	3	16	4	13	14	3	2	1	1	2	11
FBgn0010109_dpn	FBgn0010109	deadpan	dpn	0	0	0	1	0	1	0	1	0	0	0	0	0	0	0	0	0	0	0	0	0	1	0	0	0	0	0
FBgn0010113_hdc	FBgn0010113	headcase	hdc	142	116	125	281	97	270	119	227	218	202	138	253	242	200	222	56	56	174	47	38	123	32	51	39	32	25	58
FBgn0010114_hig	FBgn0010114	hikaru genki	hig	0	0	0	0	1	0	0	0	0	0	0	0	0	0	1	3	0	0	0	0	0	0	4	0	0	0	0
FBgn0010173_RpA-70	FBgn0010173	Replication Protein A 70	RpA-70	148	172	154	107	45	81	79	99	62	53	46	73	87	98	86	53	40	75	80	71	70	44	48	84	59	60	59
FBgn0010194_Wnt5	FBgn0010194	Wnt oncogene analog 5	Wnt5	1	1	0	8	2	3	6	6	2	0	3	5	2	6	1	1	1	1	2	0	0	0	2	0	2	1	0
FBgn0010197_Gyc32E	FBgn0010197	Guanyl cyclase at 32E	Gyc32E	2	1	2	1	0	1	0	0	0	0	0	0	0	1	0	0	0	1	0	0	0	0	1	0	0	0	0
FBgn0010198_RpS15Aa	FBgn0010198	Ribosomal protein S15Aa	RpS15Aa	8087	5287	7393	12018	3729	6234	18061	8520	6173	4979	5108	8224	13683	9794	11676	4623	4597	6051	15642	5140	6227	4927	5468	6804	15384	7954	5564
FBgn0010213_Sod2	FBgn0010213	Superoxide dismutase 2 (Mn)	Sod2	971	753	1099	603	228	524	290	367	253	249	234	315	500	357	369	356	368	635	342	294	324	253	265	472	308	357	353
FBgn0010215_alpha-Cat	FBgn0010215	alpha Catenin	alpha-Cat	397	273	312	277	114	277	106	216	217	196	138	221	234	203	215	76	85	208	65	43	156	44	54	61	39	43	125
FBgn0010217_ATPsynbeta	FBgn0010217	ATP synthase, beta subunit	ATPsynbeta	6369	4781	7158	5152	1931	5032	4025	3068	3159	2061	1895	3853	5424	4213	3830	2730	3064	6006	3612	2143	3601	1711	2152	3191	2940	2340	3645
FBgn0010220_Dbp45A	FBgn0010220	DEAD box protein 45A	Dbp45A	66	54	47	37	20	36	41	48	49	35	29	37	87	61	62	20	11	25	49	13	39	21	26	13	16	20	26
FBgn0010222_Nmdmc	FBgn0010222	NAD-dependent methylenetetrahydrofolate dehydrogenase	Nmdmc	37	26	26	48	11	18	43	19	11	19	17	24	34	26	30	20	12	17	32	9	29	20	18	21	16	13	30
FBgn0010223_Galphaf	FBgn0010223	G protein alpha f subunit	Galphaf	70	83	78	156	50	74	50	97	64	60	58	52	52	60	60	67	50	98	20	51	67	44	39	51	27	26	53
FBgn0010225_Gel	FBgn0010225	Gelsolin	Gel	113	117	157	206	56	95	122	87	70	38	66	57	79	71	72	71	67	86	92	59	74	52	66	71	50	55	39
FBgn0010226_GstS1	FBgn0010226	Glutathione S transferase S1	GstS1	1057	848	999	528	191	497	201	264	310	152	173	303	259	165	219	224	248	482	277	150	345	202	142	258	139	159	204
FBgn0010228_HmgZ	FBgn0010228	HMG protein Z	HmgZ	804	944	1164	1309	440	707	1200	791	555	463	435	728	1067	773	827	500	453	651	1398	509	502	425	570	445	785	440	358
FBgn0010235_Klc	FBgn0010235	Kinesin light chain	Klc	97	84	129	112	53	102	74	82	75	51	41	70	138	102	93	44	30	79	114	35	60	38	48	56	39	29	61
FBgn0010238_Lac	FBgn0010238	Lachesin	Lac	25	31	26	37	12	26	34	20	19	14	10	21	32	25	31	13	15	21	18	10	23	11	10	13	9	6	10
FBgn0010240_Lcch3	FBgn0010240	Ligand-gated chloride channel homolog 3	Lcch3	0	0	0	1	0	0	1	0	2	3	0	0	1	0	0	0	0	1	0	0	1	0	0	1	2	0	0
FBgn0010241_Mdr50	FBgn0010241	Multi drug resistance 50	Mdr50	335	272	417	592	312	686	310	521	568	408	405	743	980	925	933	359	301	1055	631	379	850	304	363	468	512	532	1108
FBgn0010246_Myo61F	FBgn0010246	Myosin 61F	Myo61F	1353	2384	3660	4361	1793	3860	2839	3777	3000	2419	2190	2918	5074	3608	3548	2132	1794	3575	3943	2163	2854	1942	2141	2125	1750	2029	2246
FBgn0010247_Parp	FBgn0010247	Poly-(ADP-ribose) polymerase	Parp	366	245	349	316	136	254	184	304	238	220	174	275	327	196	246	166	122	273	173	76	227	161	152	201	141	86	140
FBgn0010258_Rbp4	FBgn0010258	RNA-binding protein 4	Rbp4	0	0	0	0	1	1	0	1	1	0	1	0	1	1	2	0	0	0	0	0	0	2	1	0	0	0	1
FBgn0010263_Rbp9	FBgn0010263	RNA-binding protein 9	Rbp9	24	18	30	31	11	22	23	34	30	7	10	30	34	25	29	13	16	24	22	8	16	9	6	17	21	10	18
FBgn0010265_RpS13	FBgn0010265	Ribosomal protein S13	RpS13	10289	7866	11016	9267	4013	8030	7363	9767	8194	6591	6443	9110	14672	11632	10314	4653	4006	8655	6142	5197	8065	3923	4301	6195	3760	4616	6134
FBgn0010269_Dsor1	FBgn0010269	Downstream of raf1	Dsor1	73	81	83	110	43	78	109	70	55	64	40	61	107	70	76	62	39	68	119	59	54	42	48	62	69	66	62
FBgn0010278_Ssrp	FBgn0010278	Structure specific recognition protein	Ssrp	348	220	220	184	69	118	106	141	103	100	64	107	166	161	167	68	43	100	144	64	91	50	55	82	75	87	86
FBgn0010280_Taf4	FBgn0010280	TBP-associated factor 4	Taf4	132	123	183	116	62	119	55	125	145	75	81	95	140	127	111	67	40	139	74	75	98	62	70	51	19	38	55
FBgn0010282_TfIIFalpha	FBgn0010282	Transcription factor IIFalpha	TfIIFalpha	488	296	305	308	127	210	196	220	207	173	139	249	259	243	260	137	134	237	153	119	246	132	112	184	119	104	180
FBgn0010287_Trf	FBgn0010287	TBP-related factor	Trf	5	5	18	4	2	4	5	6	2	4	3	2	3	4	0	1	2	7	5	5	0	4	4	5	0	2	1
FBgn0010288_Uch	FBgn0010288	Ubiquitin carboxy-terminal hydrolase	Uch	196	161	188	171	84	105	130	146	112	116	72	109	160	136	110	61	52	95	78	32	77	34	38	95	40	62	95
FBgn0010292_bys	FBgn0010292	by S6	bys	452	289	242	250	96	175	342	243	217	160	125	218	395	279	287	118	57	128	309	99	162	88	107	109	124	134	127
FBgn0010294_ng2	FBgn0010294	new glue 2	ng2	0	0	0	0	0	0	0	0	0	0	0	0	0	0	0	0	0	0	0	0	0	0	0	0	0	0	0
FBgn0010295_ng3	FBgn0010295	new glue 3	ng3	0	0	0	0	0	0	0	0	0	0	0	0	0	0	0	0	0	0	0	0	0	0	0	0	0	0	0
FBgn0010296_ng4	FBgn0010296	new glue 4	ng4	0	0	0	0	0	0	0	0	0	0	0	0	0	0	0	0	0	0	0	0	0	0	0	0	0	0	0
FBgn0010300_brat	FBgn0010300	brain tumor	brat	75	77	92	96	31	41	28	72	77	54	53	77	83	63	63	28	16	60	32	35	56	19	19	41	20	24	37
FBgn0010303_hep	FBgn0010303	hemipterous	hep	176	124	208	153	83	122	131	131	117	93	96	143	168	132	146	82	65	110	145	56	113	56	62	84	52	59	90
FBgn0010309_pigeon	FBgn0010309	pigeon	pigeon	32	42	45	51	24	32	22	40	25	29	15	34	44	26	27	30	16	34	51	22	31	25	19	26	27	12	19
FBgn0010313_corto	FBgn0010313	corto	corto	163	125	146	203	71	152	104	147	126	84	72	133	168	154	126	71	62	96	114	50	88	37	54	47	79	43	105
FBgn0010314_Cks30A	FBgn0010314	Cyclin-dependent kinase subunit 30A	Cks30A	1	1	1	3	1	5	2	5	1	1	1	1	3	0	1	1	0	2	1	0	0	0	0	2	3	0	1
FBgn0010315_CycD	FBgn0010315	Cyclin D	CycD	23	18	19	8	9	14	11	24	9	10	7	13	20	14	15	7	7	12	20	4	6	4	4	7	6	9	4
FBgn0010316_dap	FBgn0010316	dacapo	dap	27	16	27	28	10	21	19	33	29	19	15	34	25	11	15	7	11	19	17	8	14	16	10	18	5	7	8
FBgn0010317_CycJ	FBgn0010317	Cyclin J	CycJ	0	0	0	0	0	0	0	0	0	0	1	0	0	0	0	0	0	0	0	0	0	0	0	0	1	1	0
FBgn0010323_Gsc	FBgn0010323	Goosecoid	Gsc	0	0	0	0	0	0	0	0	0	0	0	0	0	0	0	0	0	0	0	0	0	1	0	0	0	0	0
FBgn0010328_woc	FBgn0010328	without children	woc	417	294	311	277	124	250	172	228	268	162	159	229	353	268	282	125	106	238	251	112	204	126	117	186	103	124	154
FBgn0010329_Tbh	FBgn0010329	Tyramine beta hydroxylase	Tbh	0	0	0	1	1	0	2	1	2	0	0	1	1	0	0	0	0	0	0	0	0	0	1	0	0	0	0
FBgn0010333_Rac1	FBgn0010333	Rac1	Rac1	690	621	704	684	261	553	404	491	440	308	270	487	601	490	474	305	328	592	467	254	405	260	312	446	266	312	380
FBgn0010339_128up	FBgn0010339	upstream of RpIII128	128up	881	534	603	458	189	341	501	418	309	271	257	352	573	425	454	244	195	310	524	238	407	289	233	334	341	295	276
FBgn0010340_140up	FBgn0010340	upstream of RpII140	140up	106	67	89	69	25	61	60	48	41	24	35	62	88	54	63	37	21	59	90	26	45	21	36	46	43	38	40
FBgn0010341_Cdc42	FBgn0010341	Cdc42	Cdc42	775	701	817	1104	431	768	568	818	635	566	489	710	964	813	714	421	311	607	620	310	463	332	328	427	356	350	492
FBgn0010342_Map60	FBgn0010342	Microtubule-associated protein 60	Map60	28	30	18	18	7	16	8	18	8	16	10	10	14	14	16	8	10	10	24	8	14	12	11	15	18	11	5
FBgn0010348_Arf79F	FBgn0010348	ADP ribosylation factor at 79F	Arf79F	174	343	521	301	124	333	201	172	310	189	178	164	420	321	256	170	126	359	226	125	155	114	227	74	96	81	180
FBgn0010350_CdsA	FBgn0010350	CDP diglyceride synthetase	CdsA	54	82	92	117	63	122	103	88	119	53	69	101	142	119	116	48	63	121	127	69	105	31	50	73	47	37	119
FBgn0010352_Nc73EF	FBgn0010352	Neural conserved at 73EF	Nc73EF	457	412	623	647	227	501	430	423	389	295	282	452	724	596	508	304	258	548	526	285	436	240	254	314	296	362	435
FBgn0010355_Taf1	FBgn0010355	TBP-associated factor 1	Taf1	30	39	37	30	8	38	18	22	35	28	24	34	60	36	48	11	7	26	23	13	18	14	8	11	4	6	26
FBgn0010356_Taf5	FBgn0010356	TBP-associated factor 5	Taf5	89	59	76	107	38	58	82	62	53	58	52	58	77	74	80	46	40	64	86	45	43	49	37	50	63	50	39
FBgn0010357_betaTry	FBgn0010357	betaTrypsin	betaTry	1660	2817	2958	49421	19217	39029	40587	51016	46906	32093	37602	57708	74409	55534	53756	34434	23749	52789	54586	45172	56437	46100	47423	72019	54820	55417	68707
FBgn0010358_deltaTry	FBgn0010358	deltaTrypsin	deltaTry	63	60	92	467	251	202	526	323	386	184	214	262	380	445	380	497	332	407	897	1226	856	993	1010	1139	2388	3516	2842
FBgn0010359_gammaTry	FBgn0010359	gammaTrypsin	gammaTry	1	0	0	0	0	0	0	0	0	1	1	0	0	0	0	1	1	1	1	1	2	3	1	2	1	4	3
FBgn0010379_Akt1	FBgn0010379	Akt1	Akt1	87	125	192	161	67	135	98	130	110	99	74	133	176	178	136	55	40	114	69	55	88	58	62	61	63	41	50
FBgn0010380_AP-1-2beta	FBgn0010380	Adaptor Protein complex 1/2, beta subunit	AP-1-2beta	215	236	271	256	109	146	181	167	130	104	109	132	223	175	184	112	117	162	137	111	138	111	100	205	134	188	152
FBgn0010382_CycE	FBgn0010382	Cyclin E	CycE	22	26	9	8	1	4	1	5	10	1	4	4	3	1	1	3	2	3	1	0	0	4	4	2	6	2	2
FBgn0010383_Cyp18a1	FBgn0010383	Cytochrome P450-18a1	Cyp18a1	12	9	4	2	2	0	0	1	1	1	0	1	2	3	3	2	1	2	1	2	1	2	3	0	1	1	0
FBgn0010385_Def	FBgn0010385	Defensin	Def	4	12	7	125	23	36	337	211	65	121	214	284	123	135	125	81	27	28	106	164	77	223	231	326	732	87	169
FBgn0010387_Dbi	FBgn0010387	Diazepam-binding inhibitor	Dbi	513	595	738	504	576	85	272	327	772	402	249	447	1245	467	681	260	425	903	371	349	339	101	274	620	434	608	1308
FBgn0010388_Dro	FBgn0010388	Drosocin	Dro	3	3	7	71	20	24	66	89	19	34	39	39	53	27	13	42	2	1	16	10	2	3	7	4	3	5	4
FBgn0010389_htl	FBgn0010389	heartless	htl	73	53	40	50	30	32	33	32	54	6	25	58	17	23	40	24	18	34	44	16	38	13	16	12	13	15	14
FBgn0010391_Gtp-bp	FBgn0010391	GTP-binding protein	Gtp-bp	863	492	753	751	294	449	807	484	341	303	286	483	650	520	641	382	376	459	508	413	430	521	396	662	1010	476	473
FBgn0010395_Itgbn	FBgn0010395	Integrin betanu subunit	Itgbn	56	74	100	109	37	99	74	88	73	62	58	59	96	64	72	41	26	42	42	29	34	15	36	29	19	12	36
FBgn0010397_LamC	FBgn0010397	Lamin C	LamC	311	266	287	365	157	244	239	240	195	154	116	209	250	267	247	99	82	155	149	80	98	99	104	93	94	137	92
FBgn0010398_Lrr47	FBgn0010398	Leucine-rich repeat 47	Lrr47	11	6	11	15	8	8	11	9	6	4	6	6	4	6	7	6	2	3	17	8	9	5	9	7	5	9	6
FBgn0010399_Nmdar1	FBgn0010399	NMDA receptor 1	Nmdar1	0	0	0	0	0	0	0	0	0	0	0	0	0	0	0	0	0	1	0	0	0	0	0	0	0	0	0
FBgn0010401_Os-C	FBgn0010401	Os-C	Os-C	0	0	0	0	0	0	0	0	1	0	0	0	1	1	0	0	0	0	0	1	0	0	0	2	0	0	0
FBgn0010403_Obp83b	FBgn0010403	Odorant-binding protein 83b	Obp83b	0	0	0	0	0	0	0	0	0	0	0	0	0	0	2	1	0	0	0	0	0	0	0	0	1	0	1
FBgn0010406_RNaseX25	FBgn0010406	Ribonuclease X25	RNaseX25	84	72	103	169	68	111	89	155	105	93	87	107	143	106	97	56	57	91	96	73	103	71	82	100	49	59	62
FBgn0010407_Ror	FBgn0010407	Ror	Ror	0	0	0	0	0	0	0	0	0	1	0	0	0	1	0	0	2	0	0	0	1	0	2	0	0	0	0
FBgn0010408_RpS9	FBgn0010408	Ribosomal protein S9	RpS9	22151	14662	17819	34028	10858	15059	69458	21638	15244	13332	13431	20699	46217	35216	41521	12187	12867	15210	45614	13370	16616	13452	14188	16665	60181	27063	17630
FBgn0010409_RpL18A	FBgn0010409	Ribosomal protein L18A	RpL18A	4251	3044	4488	3470	1507	3286	2662	3749	3726	2761	2760	4377	5597	4707	4821	1739	1425	3696	1905	1731	3057	1219	1638	2078	919	1447	2479
FBgn0010411_RpS18	FBgn0010411	Ribosomal protein S18	RpS18	10353	5856	8882	13257	4455	7029	14338	9938	6582	5408	5998	9108	11494	9257	9459	5867	5087	7024	10479	6565	7091	6620	6533	8770	11548	7985	5709
FBgn0010412_RpS19a	FBgn0010412	Ribosomal protein S19a	RpS19a	7624	6364	8314	9959	3997	6032	9909	7927	6241	5102	5312	6966	11848	9566	9392	4998	4793	6745	6767	5826	6450	4904	5384	6769	6506	7008	5560
FBgn0010414_SerT	FBgn0010414	Serotonin transporter	SerT	0	0	0	0	0	1	2	1	0	1	0	0	0	1	0	1	0	2	0	0	1	0	0	0	0	0	0
FBgn0010415_Sdc	FBgn0010415	Syndecan	Sdc	1057	844	1025	921	405	835	812	742	745	448	471	830	1180	1004	951	346	302	710	754	204	518	199	248	366	327	245	559
FBgn0010416_TH1	FBgn0010416	TH1	TH1	39	27	48	66	24	29	27	36	29	20	19	50	30	26	18	13	12	20	12	23	38	22	35	46	12	25	20
FBgn0010417_Taf6	FBgn0010417	TBP-associated factor 6	Taf6	51	28	40	33	12	26	23	32	19	23	18	26	43	26	30	18	11	30	20	21	21	11	14	30	17	14	13
FBgn0010421_TfIIFbeta	FBgn0010421	Transcription factor TFIIFbeta	TfIIFbeta	50	41	40	52	16	31	28	29	23	21	18	37	68	49	33	13	13	34	46	15	36	21	32	28	25	31	39
FBgn0010422_TfIIS	FBgn0010422	RNA polymerase II elongation factor	TfIIS	136	122	109	95	46	66	69	79	54	60	49	49	108	96	69	42	45	62	58	48	64	34	38	47	68	70	61
FBgn0010423_TpnC47D	FBgn0010423	Troponin C at 47D	TpnC47D	265	130	216	382	120	272	190	130	185	88	75	129	175	233	143	170	162	272	102	97	153	127	104	174	132	157	259
FBgn0010424_TpnC73F	FBgn0010424	Troponin C at 73F	TpnC73F	698	621	737	310	133	276	187	113	177	56	73	187	132	145	190	94	108	234	57	33	156	25	38	84	54	34	87
FBgn0010425_epsilonTry	FBgn0010425	epsilonTrypsin	epsilonTry	409	1881	955	19928	10398	16551	31317	33032	37517	16174	20000	31525	26173	26375	19659	19428	12345	30092	50858	42936	44843	30875	32353	40242	39061	55019	51067
FBgn0010431_mtrm	FBgn0010431	matrimony	mtrm	1	1	3	3	1	1	0	6	2	0	3	3	2	0	1	0	0	0	2	0	1	1	0	1	6	2	2
FBgn0010433_ato	FBgn0010433	atonal	ato	0	0	1	0	0	0	0	0	0	0	0	0	0	0	0	0	0	0	0	0	0	0	0	0	0	0	0
FBgn0010434_cora	FBgn0010434	coracle	cora	168	145	168	264	96	219	123	213	155	152	108	232	201	209	211	71	47	120	81	58	84	44	56	54	32	41	75
FBgn0010435_emp	FBgn0010435	epithelial membrane protein	emp	147	136	204	230	71	145	191	84	164	59	67	122	141	148	146	121	103	161	105	80	126	61	71	100	113	125	126
FBgn0010438_mtSSB	FBgn0010438	mitochondrial single stranded DNA-binding protein	mtSSB	267	181	208	75	31	69	71	81	65	56	44	56	109	89	76	36	32	56	81	42	55	36	33	38	61	51	39
FBgn0010441_pll	FBgn0010441	pelle	pll	19	23	23	40	17	22	34	21	29	22	14	17	35	22	22	11	8	14	28	19	13	11	16	28	14	21	9
FBgn0010452_trn	FBgn0010452	tartan	trn	65	46	44	39	18	41	34	31	49	24	23	41	36	52	56	5	5	27	18	10	23	8	14	10	3	7	17
FBgn0010453_Wnt4	FBgn0010453	Wnt oncogene analog 4	Wnt4	44	11	24	25	12	29	11	15	22	10	14	21	24	9	19	10	8	25	26	2	13	5	7	7	3	5	17
FBgn0010470_Fkbp14	FBgn0010470	FK506-binding protein 14 ortholog	Fkbp14	1414	1033	1362	986	405	910	656	788	682	476	512	821	1432	1014	937	541	477	982	1300	424	843	380	486	815	659	663	1165
FBgn0010473_tutl	FBgn0010473	turtle	tutl	4	8	2	2	1	4	3	2	7	0	1	4	2	3	0	2	1	2	1	0	0	0	1	0	1	1	0
FBgn0010482_l(2)01289	FBgn0010482	lethal (2) 01289	l(2)01289	162	113	159	88	34	72	47	39	75	9	28	55	48	33	56	33	30	69	18	8	52	4	14	15	13	8	28
FBgn0010488_NAT1	FBgn0010488	NAT1	NAT1	655	481	607	499	201	432	293	489	408	409	318	564	664	612	604	163	145	419	239	168	396	101	148	174	141	134	319
FBgn0010497_dmGlut	FBgn0010497	Dietary and metabolic glutamate transporter	dmGlut	638	620	588	1887	615	1126	941	1036	1334	892	631	1271	1985	1499	1209	1157	677	1356	1289	1205	1938	1440	897	1610	712	902	1605
FBgn0010501_Dcp-1	FBgn0010501	Death caspase-1	Dcp-1	218	162	154	129	38	70	85	75	52	62	47	81	117	115	80	51	47	102	102	49	56	46	49	76	53	68	55
FBgn0010504_kermit	FBgn0010504	kermit	kermit	294	375	499	414	148	302	335	322	277	180	198	246	383	262	301	201	137	264	352	171	220	208	205	196	193	148	174
FBgn0010516_wal	FBgn0010516	walrus	wal	2576	1774	2307	3165	1183	2006	2282	1815	1348	1063	979	1668	2314	1762	1616	1851	1738	2683	2574	1736	2089	1472	1467	2435	2839	2019	1577
FBgn0010520_Bka	FBgn0010520	Bekka	Bka	105	58	69	87	17	63	76	53	46	49	36	38	76	59	70	34	14	30	35	25	35	26	35	46	36	58	41
FBgn0010531_Ccs	FBgn0010531	Copper chaperone for superoxide dismutase	Ccs	321	219	243	272	76	119	249	147	144	92	104	154	280	158	223	111	89	152	359	146	192	121	119	180	318	215	196
FBgn0010548_Aldh-III	FBgn0010548	Aldehyde dehydrogenase type III	Aldh-III	1287	898	1429	1058	456	1005	531	557	587	342	352	809	984	680	722	613	571	1231	1057	510	900	398	456	703	550	457	791
FBgn0010549_l(2)03659	FBgn0010549	lethal (2) 03659	l(2)03659	2	0	0	0	0	4	3	3	1	5	4	4	5	8	4	1	1	1	0	0	2	0	1	0	0	0	1
FBgn0010551_Phb2	FBgn0010551	Prohibitin 2	Phb2	1130	719	994	483	195	366	480	358	244	220	215	368	464	385	418	235	231	387	447	224	312	236	203	369	343	332	306
FBgn0010575_sbb	FBgn0010575	scribbler	sbb	595	508	500	484	220	418	258	445	407	354	349	449	610	478	518	226	147	418	188	158	390	185	138	213	142	127	211
FBgn0010583_dock	FBgn0010583	dreadlocks	dock	21	17	27	22	7	17	23	13	13	7	20	21	41	36	22	12	11	25	23	6	13	5	9	16	8	4	9
FBgn0010590_Prosbeta1	FBgn0010590	Proteasome beta1 subunit	Prosbeta1	580	369	523	723	227	365	600	447	304	245	268	432	559	438	401	307	253	312	421	250	296	307	340	499	591	453	359
FBgn0010591_Sply	FBgn0010591	Sphingosine-1-phosphate lyase	Sply	260	226	399	335	126	275	184	210	182	139	127	239	252	232	234	195	140	295	212	160	249	175	164	248	127	150	289
FBgn0010602_lwr	FBgn0010602	lesswright	lwr	599	627	761	364	198	365	282	347	281	243	184	245	438	371	308	204	178	367	220	197	320	178	162	275	173	225	282
FBgn0010607_l(2)05714	FBgn0010607	lethal (2) 05714	l(2)05714	74	47	64	57	23	46	55	30	36	29	25	50	80	69	67	21	20	42	37	25	40	13	21	43	19	29	23
FBgn0010611_Hmgs	FBgn0010611	HMG Coenzyme A synthase	Hmgs	231	167	216	225	75	142	128	151	134	89	94	158	175	153	160	107	57	135	210	109	168	115	102	182	116	142	184
FBgn0010612_ATPsynG	FBgn0010612	ATP synthase	ATPsynG	4428	3806	4812	4525	1705	2929	3174	2267	1833	1377	1388	2091	3211	2754	2483	2509	2897	3668	2510	2290	2392	1981	2035	2939	4091	3205	2606
FBgn0010620_CG10939	FBgn0010620	0	CG10939	204	156	263	181	70	184	116	121	125	74	60	120	108	127	93	79	69	115	61	35	64	28	31	37	27	23	66
FBgn0010621_Cct5	FBgn0010621	T-complex Chaperonin 5	Cct5	543	353	410	288	91	152	352	202	165	135	136	175	275	234	259	93	80	122	223	110	153	180	163	171	257	261	157
FBgn0010622_DCTN3-p24	FBgn0010622	Dynactin 3, p24 subunit	DCTN3-p24	77	84	96	126	56	86	117	114	86	66	62	109	151	96	88	45	48	67	83	49	79	37	47	76	47	52	77
FBgn0010638_Sec61beta	FBgn0010638	Sec61 beta subunit	Sec61beta	1924	1535	2365	1789	644	1347	1074	885	675	566	509	836	1334	1199	1000	1085	1214	1685	1350	948	1350	1079	1007	1573	1639	1211	1363
FBgn0010651_MFS14	FBgn0010651	Major Facilitator Superfamily Transporter 14	MFS14	2597	1772	1477	1881	638	1095	1071	1377	1134	786	816	1134	1781	1345	1389	813	465	934	983	791	1105	841	639	972	1000	1262	877
FBgn0010660_Nup214	FBgn0010660	Nucleoporin 214kD	Nup214	102	81	82	38	24	58	42	59	52	41	35	73	107	73	69	22	12	56	61	17	42	15	18	23	20	11	36
FBgn0010741_l(3)01239	FBgn0010741	lethal (3) 01239	l(3)01239	387	272	302	355	116	163	390	244	152	147	138	205	269	240	226	119	89	135	255	138	164	146	126	150	268	270	144
FBgn0010747_Srp54k	FBgn0010747	Signal recognition particle protein 54k	Srp54k	233	336	484	294	115	383	187	311	326	233	191	375	585	380	391	150	151	373	597	165	298	110	139	204	191	122	251
FBgn0010750_atms	FBgn0010750	antimeros	atms	40	13	36	34	13	22	38	25	17	19	14	20	36	29	38	18	15	22	22	15	19	12	27	24	20	28	10
FBgn0010762_simj	FBgn0010762	simjang	simj	132	96	117	128	73	90	56	113	80	75	58	92	136	95	106	70	61	82	74	59	96	46	57	76	40	44	72
FBgn0010768_sqz	FBgn0010768	squeeze	sqz	11	9	4	4	4	3	2	4	5	2	3	2	2	9	8	3	2	11	3	2	5	1	0	3	3	2	7
FBgn0010770_ppan	FBgn0010770	peter pan	ppan	94	49	33	33	12	22	41	32	32	27	26	32	66	54	43	6	6	6	36	10	30	6	16	12	22	21	19
FBgn0010772_Xe7	FBgn0010772	Xe7	Xe7	203	140	184	177	73	178	93	136	157	117	135	196	204	194	235	68	67	183	106	66	142	58	53	86	43	56	109
FBgn0010774_Ref1	FBgn0010774	RNA and export factor binding protein 1	Ref1	416	314	369	581	200	277	533	326	257	211	262	315	412	351	280	212	200	275	390	207	237	186	227	313	343	262	204
FBgn0010786_l(3)02640	FBgn0010786	lethal (3) 02640	l(3)02640	453	362	490	240	86	165	174	143	106	99	90	141	192	158	131	113	109	167	134	133	148	107	109	146	167	153	159
FBgn0010803_TrpRS	FBgn0010803	Tryptophanyl-tRNA synthetase	TrpRS	278	191	261	203	62	142	113	111	103	93	72	133	133	133	120	100	58	122	128	93	135	136	103	169	137	137	123
FBgn0010808_l(3)03670	FBgn0010808	lethal (3) 03670	l(3)03670	889	703	896	684	266	486	566	403	334	271	266	349	580	469	461	353	352	580	495	281	418	215	245	388	246	361	429
FBgn0010812_unc-45	FBgn0010812	0	unc-45	227	179	245	189	55	133	85	136	106	75	76	127	120	98	118	62	47	91	89	42	78	60	62	103	36	33	61
FBgn0010825_Gug	FBgn0010825	Grunge	Gug	649	590	646	609	351	576	394	643	563	446	449	562	972	868	684	285	290	621	437	370	549	265	283	449	287	278	364
FBgn0010830_l(3)04053	FBgn0010830	lethal (3) 04053	l(3)04053	62	51	45	46	26	33	30	41	33	37	29	37	68	58	41	19	23	47	50	20	31	20	13	23	11	21	38
FBgn0010877_l(3)05822	FBgn0010877	lethal (3) 05822	l(3)05822	67	40	65	66	20	65	36	64	60	47	43	56	63	43	49	27	18	51	57	20	36	29	37	25	25	23	32
FBgn0010894_sinu	FBgn0010894	sinuous	sinu	5	5	10	7	6	12	6	11	9	4	6	10	9	7	5	2	3	9	6	2	4	1	3	4	5	4	5
FBgn0010905_Spn	FBgn0010905	Spinophilin	Spn	494	433	566	795	320	703	362	680	774	543	521	730	856	740	878	304	259	672	527	321	638	285	309	497	232	226	448
FBgn0010909_msn	FBgn0010909	misshapen	msn	270	250	349	380	150	255	193	268	252	223	199	270	286	269	247	120	95	165	113	75	152	77	100	114	91	75	116
FBgn0010926_l(3)07882	FBgn0010926	lethal (3) 07882	l(3)07882	130	79	72	41	18	36	46	55	57	34	44	64	62	63	58	26	10	34	25	22	53	21	20	31	11	30	39
FBgn0011016_SsRbeta	FBgn0011016	Signal sequence receptor beta	SsRbeta	1650	1817	2507	2248	845	1582	1410	1068	906	722	594	915	1858	1488	1248	1427	1464	2259	1891	1274	1666	1307	1174	1829	1639	1286	1763
FBgn0011020_Sas-4	FBgn0011020	Spindle assembly abnormal 4 ortholog (C. elegans)	Sas-4	25	15	14	18	11	8	14	12	10	10	10	14	15	15	9	6	6	13	17	11	8	7	5	7	6	10	6
FBgn0011202_dia	FBgn0011202	diaphanous	dia	186	189	285	425	161	363	253	410	371	262	278	397	488	361	383	159	136	296	258	177	242	118	159	196	117	101	208
FBgn0011204_cue	FBgn0011204	cueball	cue	362	240	306	336	116	241	88	250	216	155	156	191	174	164	160	152	111	277	78	158	251	120	116	191	41	82	132
FBgn0011205_fbl	FBgn0011205	fumble	fbl	536	442	622	428	166	333	250	362	293	233	225	293	375	319	285	206	160	306	290	234	304	267	221	321	192	281	323
FBgn0011206_bol	FBgn0011206	boule	bol	127	111	122	59	34	89	33	46	73	51	41	68	78	84	67	27	25	89	22	16	55	12	13	18	5	14	42
FBgn0011207_pelo	FBgn0011207	pelota	pelo	48	38	49	54	7	28	30	36	38	25	13	23	41	31	23	27	14	26	32	34	29	19	21	28	25	31	20
FBgn0011211_blw	FBgn0011211	bellwether	blw	9271	8000	9472	5802	2821	6447	3377	3940	3964	2923	2443	4099	6534	5701	4850	3137	3737	8154	4039	2906	4236	1814	2119	3246	2484	3532	4567
FBgn0011217_eff	FBgn0011217	effete	eff	1516	1538	1707	1793	667	1070	1379	1223	810	673	619	974	1751	1157	1179	804	693	1014	2751	743	881	851	960	986	1586	1139	932
FBgn0011224_heph	FBgn0011224	hephaestus	heph	78	76	102	71	24	39	27	50	50	38	39	40	43	43	48	15	18	34	14	7	24	4	14	6	12	5	18
FBgn0011225_jar	FBgn0011225	jaguar	jar	239	198	270	305	109	239	153	246	210	147	147	194	297	242	194	152	130	243	274	144	157	112	157	127	112	114	80
FBgn0011227_ox	FBgn0011227	oxen	ox	3867	2441	3191	2797	1191	1948	1804	1668	1318	1000	997	1571	2460	1902	1736	1779	1846	2481	2536	1558	1759	1367	1410	2291	2665	2509	2060
FBgn0011230_poe	FBgn0011230	purity of essence	poe	110	83	121	62	22	118	52	59	121	67	68	99	135	103	111	13	18	85	21	12	41	9	15	21	19	14	45
FBgn0011232_scat	FBgn0011232	scattered	scat	65	63	91	72	16	62	46	46	47	34	41	47	93	65	68	40	23	52	58	35	56	33	33	41	38	39	50
FBgn0011236_ken	FBgn0011236	ken and barbie	ken	16	13	21	17	5	22	10	14	16	20	18	26	22	15	12	7	8	30	7	18	18	10	8	4	2	2	6
FBgn0011239_ms(2)35Ci	FBgn0011239	male sterile (2) 35Ci	ms(2)35Ci	0	0	0	3	1	0	0	1	0	0	1	3	0	0	0	0	0	1	0	0	1	0	0	0	0	0	0
FBgn0011241_cbx	FBgn0011241	crossbronx	cbx	87	65	77	126	21	69	115	71	59	49	35	64	110	81	84	38	28	40	88	15	38	41	26	61	50	34	44
FBgn0011244_Hsp60B	FBgn0011244	Heat shock protein 60 related	Hsp60B	0	0	0	0	0	0	0	0	0	0	0	0	0	0	0	0	0	0	0	0	0	0	0	0	1	0	0
FBgn0011259_Sema-1a	FBgn0011259	Sema-1a	Sema-1a	17	7	20	14	6	14	5	9	15	11	13	18	8	5	10	8	1	7	5	6	11	2	3	3	9	0	5
FBgn0011260_Sema-2a	FBgn0011260	Sema-2a	Sema-2a	22	25	19	13	3	11	6	21	12	12	14	10	18	11	21	5	2	6	3	9	5	3	7	6	6	2	6
FBgn0011270_Pglym87	FBgn0011270	Pglym87	Pglym87	0	0	0	0	0	0	0	0	0	0	0	0	0	0	0	0	0	0	0	0	0	0	0	0	0	0	0
FBgn0011272_RpL13	FBgn0011272	Ribosomal protein L13	RpL13	8930	5113	7485	9534	3207	5764	11477	7541	6103	4714	4931	7794	11065	8731	10280	3883	3419	5543	6396	4009	5654	3426	4030	5445	4692	4741	4900
FBgn0011273_Acam	FBgn0011273	Androcam	Acam	0	0	0	0	0	0	0	0	0	0	0	0	0	0	0	0	0	0	0	0	0	0	0	0	0	0	0
FBgn0011274_Dif	FBgn0011274	Dorsal-related immunity factor	Dif	171	141	224	65	45	93	59	54	98	35	35	98	70	70	82	35	25	82	34	27	68	13	10	40	32	17	37
FBgn0011276_HLH3B	FBgn0011276	Helix loop helix protein 3B	HLH3B	0	1	0	0	0	0	0	0	0	0	0	0	0	0	0	0	0	0	0	0	0	0	0	0	0	0	0
FBgn0011277_HLH4C	FBgn0011277	Helix loop helix protein 4C	HLH4C	0	0	0	0	0	0	0	0	0	0	0	0	0	0	0	0	0	0	0	0	0	0	0	0	0	0	0
FBgn0011278_lbe	FBgn0011278	ladybird early	lbe	0	0	0	0	0	0	0	0	0	0	0	0	0	0	0	0	0	0	0	0	0	0	0	0	0	0	0
FBgn0011279_Obp69a	FBgn0011279	Odorant-binding protein 69a	Obp69a	0	1	1	1	0	1	1	0	1	0	1	1	0	0	2	0	0	1	0	0	0	0	0	0	0	0	1
FBgn0011280_Obp19d	FBgn0011280	Odorant-binding protein 19d	Obp19d	0	0	0	0	0	0	1	2	0	0	2	0	2	0	0	0	0	0	0	0	0	0	0	0	0	0	0
FBgn0011281_Obp83a	FBgn0011281	Odorant-binding protein 83a	Obp83a	0	0	0	0	0	0	0	0	0	0	0	0	0	0	0	0	0	0	0	0	0	0	0	0	0	0	0
FBgn0011282_Obp84a	FBgn0011282	Odorant-binding protein 84a	Obp84a	0	0	0	0	0	0	0	0	0	0	0	0	0	0	0	0	0	0	0	0	0	0	0	0	0	0	0
FBgn0011283_Obp28a	FBgn0011283	Odorant-binding protein 28a	Obp28a	0	0	0	0	0	0	1	0	0	0	0	0	0	0	0	0	0	0	0	0	0	0	0	0	0	0	0
FBgn0011284_RpS4	FBgn0011284	Ribosomal protein S4	RpS4	14648	10817	14145	9613	4811	9667	8328	11304	9667	8155	8221	10701	18430	15521	13452	5131	4686	10417	6455	5209	9042	3906	4632	6588	4374	5801	7620
FBgn0011286_RyR	FBgn0011286	Ryanodine receptor	RyR	28	29	32	19	9	20	14	6	19	4	6	18	8	10	21	8	3	18	5	4	11	6	2	8	1	0	6
FBgn0011288_Snap25	FBgn0011288	Synaptosomal-associated protein 25kDa	Snap25	0	0	0	2	1	0	3	0	0	0	1	1	1	2	0	0	0	2	0	0	0	0	0	0	1	0	0
FBgn0011289_TfIIA-L	FBgn0011289	Transcription factor IIA L	TfIIA-L	273	287	265	354	159	184	353	255	170	108	149	181	312	214	232	135	159	162	280	125	120	111	153	183	194	217	151
FBgn0011290_Taf12	FBgn0011290	TBP-associated factor 12	Taf12	171	109	169	149	47	116	108	125	109	75	69	138	127	115	95	58	53	114	102	63	88	58	63	83	63	61	67
FBgn0011291_Taf11	FBgn0011291	TBP-associated factor 11	Taf11	31	24	44	53	16	32	45	29	19	19	21	28	69	37	43	13	16	24	46	16	24	15	18	18	32	22	27
FBgn0011293_a10	FBgn0011293	antennal protein 10	a10	0	0	0	0	0	0	0	0	0	0	0	0	0	0	0	0	0	0	0	0	0	0	0	0	0	0	0
FBgn0011294_a5	FBgn0011294	antennal protein 5	a5	0	0	0	0	0	0	0	0	0	0	0	0	0	0	0	0	1	0	0	0	0	0	0	0	0	0	0
FBgn0011296_l(2)efl	FBgn0011296	lethal (2) essential for life	l(2)efl	925	563	802	1493	609	1022	1125	534	675	259	351	495	477	536	567	685	678	1048	535	520	708	574	394	792	657	603	908
FBgn0011297_l(2)not	FBgn0011297	lethal (2) neighbor of tid	l(2)not	105	102	103	122	40	71	107	106	67	41	44	58	108	86	89	67	63	79	90	51	58	72	41	78	173	76	65
FBgn0011300_babo	FBgn0011300	baboon	babo	205	189	196	161	68	201	128	179	183	119	128	182	238	170	177	78	51	183	96	42	123	33	55	81	35	36	117
FBgn0011305_Rsf1	FBgn0011305	Repressor splicing factor 1	Rsf1	68	50	71	128	56	68	76	92	75	56	54	85	128	102	89	47	48	81	82	54	65	44	55	78	76	76	45
FBgn0011327_Uch-L5	FBgn0011327	Ubiquitin carboxy-terminal hydrolase L5 ortholog	Uch-L5	211	144	199	169	63	101	170	126	81	71	65	100	149	120	120	66	65	79	103	56	64	55	60	87	86	59	62
FBgn0011335_l(3)j2D3	FBgn0011335	lethal (3) j2D3	l(3)j2D3	35	34	36	33	14	32	20	25	27	25	15	28	44	46	30	13	6	33	22	13	20	14	17	7	12	19	17
FBgn0011336_OstStt3	FBgn0011336	Oligosaccharyl transferase 3	OstStt3	905	803	925	602	286	524	326	404	304	300	254	399	555	564	438	263	348	585	324	301	473	259	242	473	241	324	468
FBgn0011361_ND-ACP	FBgn0011361	NADH dehydrogenase (ubiquinone) acyl carrier protein	ND-ACP	2583	1616	2122	2271	771	1411	2724	1097	841	637	662	1097	1748	1380	1353	974	1075	1459	2018	860	1028	880	946	1267	2309	1523	1268
FBgn0011455_ND-SGDH	FBgn0011455	NADH dehydrogenase (ubiquinone) SGDH subunit	ND-SGDH	998	833	1114	902	408	766	788	549	571	416	427	616	885	774	721	465	490	930	462	358	570	289	307	460	354	454	621
FBgn0011474_Set8	FBgn0011474	SET domain containing 8	Set8	41	27	33	35	7	19	12	11	18	14	13	22	18	19	29	7	9	26	5	5	16	5	4	7	9	6	13
FBgn0011476_l(3)neo43	FBgn0011476	lethal (3) neo43	l(3)neo43	88	49	65	51	10	35	92	30	27	14	18	37	76	46	71	18	16	38	57	14	22	17	16	30	54	46	42
FBgn0011481_Ssdp	FBgn0011481	Sequence-specific single-stranded DNA-binding protein	Ssdp	438	382	376	386	179	301	205	312	281	225	223	288	449	369	350	136	154	313	190	137	262	101	136	156	130	105	188
FBgn0011509_SrpRbeta	FBgn0011509	Signal recognition particle receptor beta	SrpRbeta	205	187	237	190	71	140	130	124	144	90	97	153	196	193	149	101	65	139	113	81	174	89	81	118	69	56	157
FBgn0011554_etaTry	FBgn0011554	etaTrypsin	etaTry	532	338	410	746	276	430	1023	583	423	397	375	622	891	612	658	344	279	431	824	410	465	428	460	558	883	736	657
FBgn0011555_thetaTry	FBgn0011555	thetaTrypsin	thetaTry	2270	2439	2468	7814	3153	4723	7454	6261	6183	3537	3736	5795	8113	6922	5369	4886	3670	6376	10493	8164	8084	5981	6543	8382	9407	8000	9393
FBgn0011556_zetaTry	FBgn0011556	zetaTrypsin	zetaTry	1296	915	1338	4458	1463	2162	5335	2623	2178	1420	1326	2482	2661	2222	2340	2075	1724	2338	3177	2549	2290	2204	1991	2655	6004	2627	2150
FBgn0011559_Acp36DE	FBgn0011559	Accessory gland protein 36DE	Acp36DE	0	0	0	0	0	0	0	0	0	0	0	0	0	0	0	0	0	0	0	0	0	0	0	0	0	0	0
FBgn0011566_Smyd3	FBgn0011566	SET and MYND domain containing, class 3	Smyd3	100	79	101	124	49	85	142	99	88	45	60	89	131	101	86	71	49	78	86	81	71	51	56	98	103	82	61
FBgn0011569_can	FBgn0011569	cannonball	can	0	0	0	0	0	0	0	0	0	0	0	0	0	0	0	0	0	0	0	0	0	0	0	0	0	0	0
FBgn0011570_cpb	FBgn0011570	capping protein beta	cpb	273	242	395	383	134	315	222	306	204	184	172	288	309	224	239	129	96	206	222	111	157	87	115	149	108	122	157
FBgn0011571_caz	FBgn0011571	cabeza	caz	18	31	30	27	4	15	10	14	23	13	12	18	22	15	15	15	6	34	12	17	13	10	20	6	6	3	8
FBgn0011573_Cdc37	FBgn0011573	Cdc37	Cdc37	344	192	207	134	67	123	61	116	107	105	84	127	131	116	114	53	52	114	62	54	90	41	71	75	22	36	97
FBgn0011576_Cyp4d2	FBgn0011576	Cytochrome P450-4d2	Cyp4d2	57	46	53	96	41	64	66	48	34	29	36	43	67	68	51	74	72	107	88	86	68	50	41	94	75	86	94
FBgn0011581_Ms	FBgn0011581	Myosuppressin	Ms	0	0	0	0	0	0	0	0	0	0	0	0	0	0	0	2	1	0	0	0	0	0	0	0	0	0	0
FBgn0011582_Dop1R1	FBgn0011582	Dopamine 1-like receptor 1	Dop1R1	1	4	2	1	2	0	0	5	4	2	1	2	0	0	6	0	1	0	0	0	0	1	0	0	0	0	1
FBgn0011584_Trp1	FBgn0011584	Translocation protein 1	Trp1	661	512	761	997	460	640	603	696	590	517	443	586	788	714	637	426	394	593	529	397	589	427	383	449	381	479	469
FBgn0011586_e(r)	FBgn0011586	enhancer of rudimentary	e(r)	261	203	215	213	99	119	54	177	126	94	100	136	98	97	105	98	77	122	65	101	137	70	93	104	45	74	71
FBgn0011589_Elk	FBgn0011589	Eag-like K[+] channel	Elk	2	0	2	5	0	0	0	2	3	2	0	1	3	1	0	3	1	1	0	0	1	0	0	0	1	0	4
FBgn0011591_fng	FBgn0011591	fringe	fng	13	9	17	15	3	12	7	18	16	8	7	14	19	20	16	7	3	8	2	2	5	3	3	5	0	3	4
FBgn0011592_fra	FBgn0011592	frazzled	fra	32	33	46	34	20	30	16	39	23	32	27	35	34	35	18	9	3	23	14	12	21	8	15	15	12	18	16
FBgn0011596_fzo	FBgn0011596	fuzzy onions	fzo	4	3	3	7	0	6	2	1	8	5	7	10	2	0	11	2	1	8	0	2	4	2	0	3	0	0	4
FBgn0011603_ine	FBgn0011603	inebriated	ine	38	18	30	37	7	20	28	24	14	20	12	24	26	35	25	19	15	38	26	17	24	14	16	17	9	10	23
FBgn0011604_Iswi	FBgn0011604	Imitation SWI	Iswi	66	46	53	21	10	43	14	37	26	28	18	35	43	37	25	9	8	29	18	8	32	9	12	7	10	6	13
FBgn0011606_Klp3A	FBgn0011606	Kinesin-like protein at 3A	Klp3A	6	0	4	8	4	11	7	4	3	2	0	3	12	5	6	2	1	3	6	4	5	4	2	1	1	3	0
FBgn0011638_La	FBgn0011638	La autoantigen-like	La	375	295	304	186	58	99	201	206	128	92	108	151	265	183	143	72	40	100	143	83	123	90	99	83	135	134	89
FBgn0011640_lark	FBgn0011640	lark	lark	115	117	94	107	41	99	125	115	86	82	63	78	183	157	120	43	47	64	81	55	80	52	61	64	75	98	87
FBgn0011642_Zyx	FBgn0011642	Zyxin	Zyx	166	144	191	241	68	186	181	150	132	92	105	156	250	163	161	70	71	151	123	65	152	81	80	112	72	67	87
FBgn0011648_Mad	FBgn0011648	Mothers against dpp	Mad	110	88	182	369	119	169	164	254	135	136	154	142	195	145	114	121	79	92	152	109	108	82	89	110	72	114	69
FBgn0011653_mas	FBgn0011653	masquerade	mas	0	0	0	0	0	0	0	0	0	0	0	0	1	0	0	0	0	0	0	0	0	0	0	0	0	0	0
FBgn0011655_Med	FBgn0011655	Medea	Med	57	75	84	101	40	64	101	64	52	38	44	80	115	82	65	37	50	66	79	47	45	37	39	58	61	50	47
FBgn0011656_Mef2	FBgn0011656	Myocyte enhancer factor 2	Mef2	160	168	161	180	84	130	71	143	144	96	112	145	162	139	147	76	44	138	62	69	145	66	65	85	37	43	81
FBgn0011659_Mlh1	FBgn0011659	Mlh1	Mlh1	24	23	20	21	4	10	9	21	8	7	5	14	11	11	7	4	4	4	15	6	4	5	2	3	5	5	3
FBgn0011660_Pms2	FBgn0011660	Pms2	Pms2	15	9	11	10	1	1	6	5	1	1	3	4	1	5	3	1	0	0	1	2	1	1	3	0	5	1	1
FBgn0011661_Moe	FBgn0011661	Moesin	Moe	1816	1608	1950	2869	1290	1984	1650	2167	1595	1532	1420	1913	2756	2570	2330	903	741	1466	1573	849	1212	690	812	913	772	1359	1319
FBgn0011666_msi	FBgn0011666	musashi	msi	23	40	37	32	18	28	26	26	33	37	28	33	34	46	37	13	6	27	18	9	12	12	12	9	8	3	20
FBgn0011668_Mst57Da	FBgn0011668	Male-specific RNA 57Da	Mst57Da	0	0	0	0	0	0	0	0	0	0	0	0	0	0	0	0	0	0	0	0	0	0	0	0	0	0	0
FBgn0011669_Mst57Db	FBgn0011669	Male-specific RNA 57Db	Mst57Db	0	0	0	0	0	0	0	0	0	0	0	0	0	0	1	0	0	0	0	0	0	0	0	0	0	4	0
FBgn0011670_Mst57Dc	FBgn0011670	Male-specific transcript 57Dc	Mst57Dc	0	0	0	0	0	0	0	0	0	0	0	0	0	0	0	0	0	0	0	0	0	0	0	0	0	0	0
FBgn0011672_Mvl	FBgn0011672	Malvolio	Mvl	163	169	169	424	190	313	211	329	321	189	188	279	251	175	167	185	186	245	183	135	221	69	100	115	106	94	124
FBgn0011674_insc	FBgn0011674	inscuteable	insc	15	20	20	47	22	25	51	49	36	31	29	43	55	47	34	28	18	54	27	34	35	22	27	39	30	38	38
FBgn0011676_Nos	FBgn0011676	Nitric oxide synthase	Nos	0	3	1	0	0	2	0	1	0	0	0	1	0	0	0	2	0	0	1	0	0	0	1	1	0	0	0
FBgn0011692_pav	FBgn0011692	pavarotti	pav	3	2	3	3	3	3	5	1	1	5	0	0	0	0	1	1	0	0	3	0	3	0	0	1	0	0	0
FBgn0011693_Pdh	FBgn0011693	Photoreceptor dehydrogenase	Pdh	2	0	0	0	0	0	3	1	0	0	1	0	0	0	0	0	0	3	0	0	0	0	0	1	1	2	0
FBgn0011694_EbpII	FBgn0011694	Ejaculatory bulb protein II	EbpII	0	0	0	0	0	0	0	1	1	0	1	0	0	0	1	0	0	0	0	0	0	0	0	0	0	0	0
FBgn0011695_EbpIII	FBgn0011695	Ejaculatory bulb protein III	EbpIII	1943	1679	2104	3308	1384	3034	2308	1683	2544	664	1170	2399	3124	2826	2757	1360	1340	2816	1884	1290	2339	1436	1202	1781	1768	1813	2886
FBgn0011701_repo	FBgn0011701	reversed polarity	repo	1	2	1	1	1	0	0	0	2	0	0	1	0	0	1	0	0	1	0	0	2	0	0	0	0	0	1
FBgn0011703_RnrL	FBgn0011703	Ribonucleoside diphosphate reductase large subunit	RnrL	196	154	107	12	17	32	27	27	23	10	16	24	35	17	18	4	7	25	28	7	11	9	14	15	9	13	17
FBgn0011704_RnrS	FBgn0011704	Ribonucleoside diphosphate reductase small subunit	RnrS	322	240	230	142	41	86	166	149	84	109	77	96	201	124	111	36	40	67	83	29	53	56	41	44	87	79	20
FBgn0011705_rost	FBgn0011705	rolling stone	rost	1586	1300	2359	656	183	405	317	429	389	276	200	307	325	380	329	210	140	257	174	172	239	174	171	198	164	201	140
FBgn0011706_rpr	FBgn0011706	reaper	rpr	3	5	3	12	4	6	3	4	2	3	3	5	4	9	8	3	4	4	1	3	4	0	1	2	0	0	2
FBgn0011708_Syx5	FBgn0011708	Syntaxin 5	Syx5	348	228	289	200	103	193	110	186	139	120	106	157	201	165	171	136	80	154	214	131	197	132	115	189	148	127	175
FBgn0011710_42614	FBgn0011710	Septin 1	42614	61	38	62	66	25	58	42	45	40	41	21	46	62	52	39	16	20	32	38	27	22	20	23	28	23	21	44
FBgn0011715_Snr1	FBgn0011715	Snf5-related 1	Snr1	105	56	65	81	30	44	79	49	40	29	26	39	76	53	55	27	28	50	62	39	37	41	25	50	62	41	42
FBgn0011722_Tig	FBgn0011722	Tiggrin	Tig	2	4	6	12	2	4	8	5	3	0	1	0	1	3	2	1	0	1	1	0	0	1	1	0	0	0	1
FBgn0011723_byn	FBgn0011723	brachyenteron	byn	8	0	1	1	0	0	4	0	2	4	0	2	3	0	1	1	0	3	0	0	0	0	0	0	0	0	0
FBgn0011725_twin	FBgn0011725	twin	twin	144	116	171	108	57	90	81	86	107	80	82	105	184	138	135	52	37	89	92	35	80	25	36	54	38	43	85
FBgn0011726_tsr	FBgn0011726	twinstar	tsr	3559	3110	3731	5935	1937	2968	4454	3020	1729	1946	1686	2229	2956	2903	2285	1728	1464	2000	2088	1201	1609	1437	1685	1829	1997	2141	1901
FBgn0011737_Wee1	FBgn0011737	Wee1 kinase	Wee1	8	18	13	17	10	13	10	11	15	12	16	17	10	9	7	9	6	15	2	10	7	3	5	6	4	8	6
FBgn0011739_wts	FBgn0011739	warts	wts	280	200	240	193	91	199	134	188	187	132	140	183	237	201	207	85	58	189	96	63	149	52	60	101	79	66	106
FBgn0011740_alpha-Man-IIa	FBgn0011740	alpha-Mannosidase class II a	alpha-Man-IIa	9	6	12	14	6	13	8	18	16	7	13	12	13	8	14	6	4	12	5	11	19	1	5	8	12	5	9
FBgn0011741_Arp6	FBgn0011741	Actin-related protein 6	Arp6	134	104	132	150	49	74	94	95	57	55	44	70	119	98	108	55	50	75	75	68	66	57	57	90	71	90	73
FBgn0011742_Arp2	FBgn0011742	Actin-related protein 2	Arp2	339	323	496	641	221	443	287	438	374	309	291	373	458	385	325	179	133	339	367	128	257	127	119	150	135	128	197
FBgn0011743_Arp53D	FBgn0011743	Actin-related protein 53D	Arp53D	0	0	0	0	0	0	0	0	0	0	0	0	0	0	0	0	0	0	0	0	0	0	0	0	0	0	0
FBgn0011745_Arp1	FBgn0011745	Actin-related protein 1	Arp1	335	309	443	504	160	293	470	326	218	186	169	282	450	341	351	195	183	236	558	169	239	210	175	279	409	299	273
FBgn0011746_ana	FBgn0011746	anachronism	ana	0	0	0	1	0	2	1	0	2	1	0	1	0	4	0	0	0	1	0	0	1	0	1	0	0	0	1
FBgn0011747_Ank	FBgn0011747	Ankyrin	Ank	127	122	220	111	48	131	62	87	125	69	94	151	146	119	100	68	37	119	40	33	69	24	32	46	17	7	53
FBgn0011754_PhKgamma	FBgn0011754	Phosphorylase kinase gamma	PhKgamma	243	251	235	179	106	135	112	145	119	84	90	125	202	173	144	63	90	147	143	65	136	64	77	89	74	93	102
FBgn0011758_B-H1	FBgn0011758	BarH1	B-H1	0	0	0	0	0	0	0	2	0	0	0	1	0	0	0	0	0	0	0	0	0	0	0	0	0	0	0
FBgn0011760_ctp	FBgn0011760	cut up	ctp	5132	3233	3172	3440	1333	2456	1664	2085	1710	1503	1403	2278	2555	1995	2240	1213	1184	2057	1335	679	1788	914	975	1510	755	797	1654
FBgn0011761_dhd	FBgn0011761	deadhead	dhd	0	1	0	0	0	1	6	3	0	0	1	0	1	0	0	1	0	0	20	8	0	1	5	2	96	20	0
FBgn0011762_DNApol-alpha50	FBgn0011762	DNA polymerase alpha 50kD	DNApol-alpha50	121	72	67	32	10	13	25	25	18	11	12	19	37	19	19	11	13	21	21	8	7	5	9	23	8	11	6
FBgn0011763_Dp	FBgn0011763	DP transcription factor	Dp	215	180	191	140	64	135	116	132	148	107	95	110	237	187	147	70	60	122	110	64	103	37	52	60	73	84	112
FBgn0011766_E2f1	FBgn0011766	E2F transcription factor 1	E2f1	721	720	663	758	333	435	255	554	390	349	328	383	499	476	470	325	286	460	314	306	449	234	252	352	211	252	276
FBgn0011768_Fdh	FBgn0011768	Formaldehyde dehydrogenase	Fdh	2451	1343	1607	1191	330	612	1094	538	414	317	337	565	724	545	668	453	504	632	788	377	493	416	402	729	1066	561	486
FBgn0011769_Fdx1	FBgn0011769	Ferredoxin 1	Fdx1	78	78	85	46	23	37	42	47	36	35	26	41	76	64	62	21	20	41	33	18	35	16	24	23	11	27	26
FBgn0011770_Gip	FBgn0011770	GIP-like	Gip	10685	6082	7785	2880	726	1214	1456	933	582	485	504	756	909	577	681	1627	1484	1994	1550	683	1087	797	920	1577	2231	1162	1047
FBgn0011771_Hem	FBgn0011771	HEM-protein	Hem	56	31	44	17	11	36	11	19	29	24	18	41	49	25	46	6	7	26	14	10	17	4	5	13	7	3	19
FBgn0011774_Irbp	FBgn0011774	Inverted repeat-binding protein	Irbp	16	11	19	12	7	8	10	11	10	8	9	14	19	16	16	4	3	10	13	8	10	6	3	10	6	10	7
FBgn0011785_BRWD3	FBgn0011785	BRWD3	BRWD3	108	80	68	62	30	54	54	56	54	41	42	50	84	66	65	31	28	56	25	27	37	27	29	26	18	13	32
FBgn0011787_mRpL12	FBgn0011787	mitochondrial ribosomal protein L12	mRpL12	1308	779	945	290	128	287	315	270	199	220	183	272	392	287	294	147	135	302	230	151	235	172	136	230	220	198	232
FBgn0011802_Gem3	FBgn0011802	Gemin3	Gem3	21	12	16	11	8	7	8	23	10	11	9	10	18	13	10	3	7	18	9	9	14	3	7	6	5	6	5
FBgn0011812_Lcp1Psi	FBgn0011812	Larval cuticle protein 1 pseudogene	Lcp1Psi	1	0	0	0	0	0	0	0	0	0	0	0	0	0	0	0	0	0	0	0	0	0	0	0	0	0	0
FBgn0011817_nmo	FBgn0011817	nemo	nmo	125	114	106	52	17	70	43	47	61	29	30	51	70	53	56	23	24	48	21	20	33	15	16	13	9	25	30
FBgn0011818_oaf	FBgn0011818	out at first	oaf	69	63	46	57	14	53	29	55	30	36	25	53	54	34	30	36	23	40	25	17	27	22	17	19	14	10	28
FBgn0011822_pcl	FBgn0011822	pepsinogen-like	pcl	576	390	771	949	338	757	807	598	501	389	362	663	983	735	601	353	373	594	797	375	550	270	349	451	461	353	442
FBgn0011824_CG4038	FBgn0011824	0	CG4038	1897	1294	1423	1020	322	825	1319	1385	1220	717	795	1437	2138	1359	1782	383	234	608	2409	475	809	426	535	610	747	523	491
FBgn0011826_Pp2B-14D	FBgn0011826	Protein phosphatase 2B at 14D	Pp2B-14D	247	184	189	237	98	139	106	146	100	101	100	151	139	133	132	108	92	140	134	109	134	109	96	131	64	96	102
FBgn0011828_Pxn	FBgn0011828	Peroxidasin	Pxn	15	11	14	4	3	13	5	5	3	1	2	3	2	2	8	10	3	3	1	0	4	0	2	4	1	6	4
FBgn0011829_Ret	FBgn0011829	Ret oncogene	Ret	10	15	9	7	1	3	1	6	4	3	3	3	2	4	3	1	0	4	1	2	4	0	2	4	1	0	1
FBgn0011832_Ser12	FBgn0011832	Serine protease 12	Ser12	9	0	14	0	1	0	0	0	0	0	0	0	0	0	0	17	0	0	1	0	1	0	1	0	0	0	0
FBgn0011834_Ser6	FBgn0011834	Serine protease 6	Ser6	110	379	554	1673	482	712	1705	699	476	388	390	478	843	533	588	488	506	557	1318	398	360	431	565	394	1355	480	528
FBgn0011836_Taf2	FBgn0011836	TBP-associated factor 2	Taf2	70	50	63	52	24	52	17	35	36	31	25	38	54	49	60	20	14	41	33	21	38	14	17	12	12	6	23
FBgn0011837_Tis11	FBgn0011837	Tis11 homolog	Tis11	347	452	586	662	259	554	393	511	483	402	341	482	712	613	501	267	241	495	363	155	396	169	227	206	219	138	323
FBgn0011840_tRNA:Ala-AGC-2-3	FBgn0011840	transfer RNA:Alanine-AGC 2-3	tRNA:Ala-AGC-2-3	0	0	0	0	0	0	0	0	0	0	0	0	0	0	0	0	0	0	0	0	0	0	0	0	0	0	0
FBgn0011844_tRNA:Asp-GTC-1-10	FBgn0011844	transfer RNA:Aspartic acid-GTC 1-10	tRNA:Asp-GTC-1-10	0	0	0	0	0	0	0	0	0	0	0	0	0	0	0	0	0	0	0	0	0	0	0	0	1	0	0
FBgn0011845_tRNA:Asp-GTC-1-11	FBgn0011845	transfer RNA:Aspartic acid-GTC 1-11	tRNA:Asp-GTC-1-11	0	0	0	0	0	0	0	0	0	0	0	0	0	0	0	0	0	0	0	0	0	0	0	0	0	0	0
FBgn0011848_tRNA:Glu-TTC-1-6	FBgn0011848	transfer RNA:Glutamic acid-TTC 1-6	tRNA:Glu-TTC-1-6	0	0	0	0	0	0	0	0	0	0	0	0	0	0	0	0	0	0	0	1	0	0	0	0	0	2	0
FBgn0011849_tRNA:Glu-TTC-1-5	FBgn0011849	transfer RNA:Glutamic acid-TTC 1-5	tRNA:Glu-TTC-1-5	1	1	1	1	0	0	0	1	0	1	0	0	0	0	0	0	0	0	0	0	0	1	0	0	0	1	0
FBgn0011850_tRNA:Glu-TTC-1-4	FBgn0011850	transfer RNA:Glutamic acid-TTC 1-4	tRNA:Glu-TTC-1-4	0	0	0	0	0	0	0	1	0	0	0	0	0	0	0	0	0	0	0	0	0	0	0	0	0	0	0
FBgn0011851_tRNA:Glu-CTC-3-4	FBgn0011851	transfer RNA:Glutamic acid-CTC 3-4	tRNA:Glu-CTC-3-4	0	0	0	0	0	0	0	0	0	0	0	0	0	0	0	0	0	0	0	0	0	0	0	0	1	0	0
FBgn0011852_tRNA:Glu-CTC-3-5	FBgn0011852	transfer RNA:Glutamic acid-CTC 3-5	tRNA:Glu-CTC-3-5	0	0	0	0	0	0	0	0	0	0	0	0	0	0	0	0	0	0	0	0	0	0	0	0	0	0	0
FBgn0011853_tRNA:Glu-CTC-3-6	FBgn0011853	transfer RNA:Glutamic acid-CTC 3-6	tRNA:Glu-CTC-3-6	0	0	0	0	0	0	0	0	0	0	0	0	0	0	0	0	0	0	0	0	0	0	0	0	0	0	0
FBgn0011854_tRNA:Glu-CTC-3-8	FBgn0011854	transfer RNA:Glutamic acid-CTC 3-8	tRNA:Glu-CTC-3-8	0	0	0	0	0	0	0	0	0	0	0	0	0	0	0	0	0	0	0	0	0	0	0	0	0	0	0
FBgn0011855_tRNA:Glu-CTC-3-9	FBgn0011855	transfer RNA:Glutamic acid-CTC 3-9	tRNA:Glu-CTC-3-9	0	0	0	0	0	0	0	0	0	0	0	0	0	0	0	0	0	0	0	0	0	0	0	0	0	0	0
FBgn0011858_tRNA:Phe-GAA-1-8	FBgn0011858	transfer RNA:Phenylalanine-GAA 1-8	tRNA:Phe-GAA-1-8	0	1	0	0	0	0	0	0	0	0	0	0	0	0	0	1	0	0	0	0	0	0	0	0	0	0	0
FBgn0011859_tRNA:Gly-GCC-1-1	FBgn0011859	transfer RNA:Glycine-GCC 1-1	tRNA:Gly-GCC-1-1	0	0	0	0	0	0	0	0	0	0	0	0	0	0	0	0	0	0	0	0	0	0	0	0	0	0	0
FBgn0011860_tRNA:Gly-GCC-1-2	FBgn0011860	transfer RNA:Glycine-GCC 1-2	tRNA:Gly-GCC-1-2	0	0	0	0	0	0	0	0	0	0	0	0	0	0	0	0	0	0	0	0	0	0	0	0	0	0	0
FBgn0011861_tRNA:Gly-GCC-1-3	FBgn0011861	transfer RNA:Glycine-GCC 1-3	tRNA:Gly-GCC-1-3	0	0	0	0	0	0	0	0	0	0	0	0	0	0	0	0	0	0	0	0	0	0	0	0	0	0	0
FBgn0011862_tRNA:Gly-GCC-1-4	FBgn0011862	transfer RNA:Glycine-GCC 1-4	tRNA:Gly-GCC-1-4	0	0	0	0	0	0	0	0	0	0	0	0	0	0	0	0	0	0	0	0	0	0	0	0	0	0	0
FBgn0011863_tRNA:Gly-GCC-1-5	FBgn0011863	transfer RNA:Glycine-GCC 1-5	tRNA:Gly-GCC-1-5	0	0	0	0	0	0	0	0	0	0	0	0	0	0	0	0	0	0	0	0	0	0	0	0	1	0	0
FBgn0011864_tRNA:Gly-GCC-1-6	FBgn0011864	transfer RNA:Glycine-GCC 1-6	tRNA:Gly-GCC-1-6	0	0	0	0	0	0	0	0	0	0	0	0	0	0	0	0	0	0	0	0	0	0	0	0	0	0	0
FBgn0011865_tRNA:Gly-GCC-1-7	FBgn0011865	transfer RNA:Glycine-GCC 1-7	tRNA:Gly-GCC-1-7	0	0	1	0	0	0	0	0	0	0	0	0	0	0	0	0	0	0	0	0	0	0	0	0	0	0	0
FBgn0011866_tRNA:Gly-GCC-2-1	FBgn0011866	transfer RNA:Glycine-GCC 2-1	tRNA:Gly-GCC-2-1	0	0	0	0	0	0	0	0	0	0	0	0	0	0	0	0	0	0	0	0	0	0	0	0	0	0	0
FBgn0011867_tRNA:Gly-GCC-1-8	FBgn0011867	transfer RNA:Glycine-GCC 1-8	tRNA:Gly-GCC-1-8	0	0	0	0	0	0	0	0	0	0	0	0	0	0	0	0	0	0	0	0	0	0	0	0	0	0	0
FBgn0011868_tRNA:Gly-GCC-1-9	FBgn0011868	transfer RNA:Glycine-GCC 1-9	tRNA:Gly-GCC-1-9	0	0	0	0	0	0	0	0	0	0	0	0	0	0	0	0	0	0	0	0	0	0	0	0	0	0	0
FBgn0011869_tRNA:Gly-GCC-1-10	FBgn0011869	transfer RNA:Glycine-GCC 1-10	tRNA:Gly-GCC-1-10	0	0	0	0	0	0	0	0	0	0	0	0	0	0	0	0	0	0	0	0	0	0	0	0	0	0	0
FBgn0011870_tRNA:Gly-GCC-1-11	FBgn0011870	transfer RNA:Glycine-GCC 1-11	tRNA:Gly-GCC-1-11	0	0	0	0	0	0	0	0	0	0	0	0	0	0	0	0	0	0	0	0	1	0	0	0	2	0	0
FBgn0011871_tRNA:Gly-GCC-1-12	FBgn0011871	transfer RNA:Glycine-GCC 1-12	tRNA:Gly-GCC-1-12	0	1	0	0	0	0	0	0	1	0	0	0	0	0	0	0	0	0	0	0	0	0	0	0	0	0	0
FBgn0011872_tRNA:Gly-GCC-1-13	FBgn0011872	transfer RNA:Glycine-GCC 1-13	tRNA:Gly-GCC-1-13	0	1	0	2	0	0	0	0	0	0	0	0	0	0	0	0	0	0	1	0	0	0	0	0	0	1	0
FBgn0011877_tRNA:His-GTG-2-1Psi	FBgn0011877	transfer RNA:Histidine-GTG 2-1 pseudogene	tRNA:His-GTG-2-1Psi	0	0	0	0	0	0	0	1	0	0	0	0	1	1	0	0	0	0	0	2	0	2	0	1	1	0	0
FBgn0011878_tRNA:His-GTG-1-4	FBgn0011878	transfer RNA:Histidine-GTG 1-4	tRNA:His-GTG-1-4	0	0	0	0	0	0	0	0	0	0	0	0	0	0	0	0	0	0	0	0	0	0	0	0	0	0	0
FBgn0011879_tRNA:Ala-TGC-2-1	FBgn0011879	transfer RNA:Alanine-TGC 2-1	tRNA:Ala-TGC-2-1	0	0	0	0	1	0	1	0	1	0	1	0	0	0	0	0	0	0	0	0	3	0	0	0	1	0	0
FBgn0011880_tRNA:Ile-AAT-1-1	FBgn0011880	transfer RNA:Isoleucine-AAT 1-1	tRNA:Ile-AAT-1-1	3	2	1	1	0	0	0	0	1	1	0	1	0	1	0	1	1	1	0	1	0	0	1	0	0	0	0
FBgn0011881_tRNA:Ile-AAT-1-3	FBgn0011881	transfer RNA:Isoleucine-AAT 1-3	tRNA:Ile-AAT-1-3	0	0	0	0	0	0	0	0	0	0	0	0	0	0	0	0	0	0	0	0	0	0	0	0	0	0	0
FBgn0011882_tRNA:Ile-AAT-1-4	FBgn0011882	transfer RNA:Isoleucine-AAT 1-4	tRNA:Ile-AAT-1-4	0	0	0	0	0	0	0	0	0	0	0	0	0	0	0	0	1	1	0	0	0	0	0	0	0	0	0
FBgn0011883_tRNA:Ile-AAT-1-5	FBgn0011883	transfer RNA:Isoleucine-AAT 1-5	tRNA:Ile-AAT-1-5	0	0	0	0	0	0	0	0	0	0	0	0	0	0	0	0	0	0	0	0	0	0	0	0	0	0	0
FBgn0011884_tRNA:Ile-AAT-1-6	FBgn0011884	transfer RNA:Isoleucine-AAT 1-6	tRNA:Ile-AAT-1-6	2	0	2	0	0	1	0	0	1	0	0	0	0	0	0	0	0	1	1	1	1	1	0	0	0	0	0
FBgn0011885_tRNA:Ile-AAT-1-7	FBgn0011885	transfer RNA:Isoleucine-AAT 1-7	tRNA:Ile-AAT-1-7	0	0	0	0	0	0	0	0	0	0	0	0	0	0	0	0	0	0	0	0	0	0	0	0	0	0	0
FBgn0011887_tRNA:Lys-CTT-1-4	FBgn0011887	transfer RNA:Lysine-CTT 1-4	tRNA:Lys-CTT-1-4	0	0	0	0	0	0	0	0	0	0	0	0	0	0	0	0	0	0	0	0	0	0	0	0	0	0	0
FBgn0011888_tRNA:Lys-CTT-1-3	FBgn0011888	transfer RNA:Lysine-CTT 1-3	tRNA:Lys-CTT-1-3	0	0	0	0	0	0	0	0	0	0	0	0	0	0	0	0	0	0	0	0	0	0	0	0	0	0	0
FBgn0011889_tRNA:Lys-CTT-1-2	FBgn0011889	transfer RNA:Lysine-CTT 1-2	tRNA:Lys-CTT-1-2	4	0	0	1	0	0	0	0	0	0	1	0	0	0	1	0	0	1	0	1	0	0	1	0	2	2	0
FBgn0011890_tRNA:Lys-CTT-1-5	FBgn0011890	transfer RNA:Lysine-CTT 1-5	tRNA:Lys-CTT-1-5	0	0	0	0	1	0	0	0	0	0	0	0	0	0	0	0	0	0	0	0	0	0	0	0	0	0	0
FBgn0011891_tRNA:Lys-CTT-1-1	FBgn0011891	transfer RNA:Lysine-CTT 1-1	tRNA:Lys-CTT-1-1	0	0	1	2	0	2	0	0	0	1	1	0	1	0	0	0	1	1	0	0	2	1	0	0	0	0	0
FBgn0011892_tRNA:Lys-CTT-1-6	FBgn0011892	transfer RNA:Lysine-CTT 1-6	tRNA:Lys-CTT-1-6	0	0	0	0	0	0	0	0	0	0	0	0	0	0	0	0	0	0	0	0	0	0	0	0	0	0	0
FBgn0011893_tRNA:Lys-CTT-1-7	FBgn0011893	transfer RNA:Lysine-CTT 1-7	tRNA:Lys-CTT-1-7	0	0	0	0	0	0	0	0	0	0	0	0	0	0	0	0	0	0	0	0	0	0	0	0	0	0	0
FBgn0011894_tRNA:Lys-CTT-1-8	FBgn0011894	transfer RNA:Lysine-CTT 1-8	tRNA:Lys-CTT-1-8	0	0	0	0	0	0	0	0	0	0	0	0	0	0	0	0	0	0	0	0	0	0	0	0	0	0	0
FBgn0011895_tRNA:Lys-CTT-1-9	FBgn0011895	transfer RNA:Lysine-CTT 1-9	tRNA:Lys-CTT-1-9	0	0	0	0	0	0	0	0	0	0	0	0	0	0	0	0	0	0	0	0	0	0	0	0	0	0	0
FBgn0011896_tRNA:Lys-CTT-1-10	FBgn0011896	transfer RNA:Lysine-CTT 1-10	tRNA:Lys-CTT-1-10	0	0	0	0	0	1	0	0	0	1	0	0	0	0	0	0	0	0	0	0	0	0	0	0	0	1	0
FBgn0011897_tRNA:Lys-CTT-1-11	FBgn0011897	transfer RNA:Lysine-CTT 1-11	tRNA:Lys-CTT-1-11	0	3	2	0	0	0	0	1	0	0	0	1	0	1	0	0	1	0	0	0	0	0	0	0	1	0	0
FBgn0011902_tRNA:Lys-TTT-1-1	FBgn0011902	transfer RNA:Lysine-TTT 1-1	tRNA:Lys-TTT-1-1	0	0	0	0	0	0	0	0	0	0	0	0	0	0	0	0	0	0	0	0	0	0	0	0	0	0	0
FBgn0011904_tRNA:Lys-TTT-2-4	FBgn0011904	transfer RNA:Lysine-TTT 2-4	tRNA:Lys-TTT-2-4	0	0	0	0	0	0	0	0	0	0	0	0	0	0	0	0	0	0	0	0	0	0	0	0	0	0	0
FBgn0011905_tRNA:Lys-TTT-2-5	FBgn0011905	transfer RNA:Lysine-TTT 2-5	tRNA:Lys-TTT-2-5	0	0	0	0	0	0	0	0	0	0	0	0	0	0	0	0	0	0	0	0	0	0	0	0	0	0	0
FBgn0011906_tRNA:Leu-CAG-1-1	FBgn0011906	transfer RNA:Leucine-CAG 1-1	tRNA:Leu-CAG-1-1	0	0	0	0	0	0	0	0	0	0	0	0	0	0	0	0	0	0	0	0	0	0	0	0	0	0	0
FBgn0011909_tRNA:Leu-CAA-2-1	FBgn0011909	transfer RNA:Leucine-CAA 2-1	tRNA:Leu-CAA-2-1	0	1	2	0	1	0	0	1	0	0	1	3	0	0	1	0	0	0	0	0	1	0	0	0	0	0	0
FBgn0011910_tRNA:Leu-CAA-1-1	FBgn0011910	transfer RNA:Leucine-CAA 1-1	tRNA:Leu-CAA-1-1	0	0	0	0	0	0	0	0	0	0	0	0	0	0	0	0	0	1	0	0	1	0	0	0	0	0	0
FBgn0011915_tRNA:Met-CAT-1-1	FBgn0011915	transfer RNA:Methionine-CAT 1-1	tRNA:Met-CAT-1-1	0	0	0	0	0	0	0	0	0	1	0	0	0	0	0	0	0	0	0	0	0	0	1	0	2	0	0
FBgn0011916_tRNA:Met-CAT-1-2	FBgn0011916	transfer RNA:Methionine-CAT 1-2	tRNA:Met-CAT-1-2	1	0	0	0	1	0	0	0	0	0	0	0	0	0	0	0	0	0	0	0	0	0	0	0	0	0	0
FBgn0011919_tRNA:Met-CAT-1-5	FBgn0011919	transfer RNA:Methionine-CAT 1-5	tRNA:Met-CAT-1-5	0	0	0	0	0	0	0	0	0	0	0	0	0	0	0	0	0	0	0	0	0	0	0	0	0	0	0
FBgn0011921_tRNA:iMet-CAT-2-1	FBgn0011921	transfer RNA:initiator Methionine-CAT 2-1	tRNA:iMet-CAT-2-1	0	0	0	0	0	0	0	0	0	0	0	0	0	0	0	0	0	0	0	0	0	0	0	0	0	0	0
FBgn0011927_tRNA:iMet-CAT-1-4	FBgn0011927	transfer RNA:initiator Methionine-CAT 1-4	tRNA:iMet-CAT-1-4	0	0	0	0	0	0	0	0	0	0	0	0	0	0	0	0	0	0	0	0	0	0	0	0	0	0	0
FBgn0011928_tRNA:iMet-CAT-1-5	FBgn0011928	transfer RNA:initiator Methionine-CAT 1-5	tRNA:iMet-CAT-1-5	0	0	0	0	0	0	0	0	0	0	0	0	0	0	0	0	0	0	0	0	1	0	0	0	0	0	0
FBgn0011931_tRNA:Asn-GTT-1-6	FBgn0011931	transfer RNA:Asparagine-GTT 1-6	tRNA:Asn-GTT-1-6	0	0	0	2	0	1	0	0	0	0	0	0	1	1	0	0	0	0	0	0	0	0	0	0	1	0	0
FBgn0011932_tRNA:Asn-GTT-1-5	FBgn0011932	transfer RNA:Asparagine-GTT 1-5	tRNA:Asn-GTT-1-5	1	0	0	1	0	0	0	0	0	0	1	0	0	0	1	0	0	0	0	0	0	2	0	0	0	0	0
FBgn0011933_tRNA:Asn-GTT-1-4	FBgn0011933	transfer RNA:Asparagine-GTT 1-4	tRNA:Asn-GTT-1-4	1	2	1	1	0	1	0	0	2	1	0	0	2	0	4	3	1	1	2	1	1	0	0	0	0	0	0
FBgn0011934_tRNA:Asn-GTT-1-8	FBgn0011934	transfer RNA:Asparagine-GTT 1-8	tRNA:Asn-GTT-1-8	0	0	0	0	0	0	0	0	0	0	0	0	0	0	0	0	0	0	0	0	0	0	0	0	0	0	0
FBgn0011935_tRNA:Asn-GTT-1-7	FBgn0011935	transfer RNA:Asparagine-GTT 1-7	tRNA:Asn-GTT-1-7	0	0	0	0	0	0	0	0	0	0	0	0	0	0	0	0	0	0	0	0	0	1	0	0	0	0	0
FBgn0011936_tRNA:Asn-GTT-1-3	FBgn0011936	transfer RNA:Asparagine-GTT 1-3	tRNA:Asn-GTT-1-3	0	0	0	0	0	0	0	0	0	0	0	0	0	0	0	0	0	0	0	0	0	0	0	0	0	0	0
FBgn0011937_tRNA:Asn-GTT-1-2	FBgn0011937	transfer RNA:Asparagine-GTT 1-2	tRNA:Asn-GTT-1-2	0	4	0	2	0	1	2	0	1	1	1	0	1	1	0	1	0	0	2	1	0	0	0	0	4	1	0
FBgn0011938_tRNA:Asn-GTT-1-1	FBgn0011938	transfer RNA:Asparagine-GTT 1-1	tRNA:Asn-GTT-1-1	0	0	0	0	0	0	0	0	0	0	0	0	0	0	0	0	0	0	0	0	0	0	0	0	0	0	0
FBgn0011944_tRNA:Pro-TGG-1-1	FBgn0011944	transfer RNA:Proline-TGG 1-1	tRNA:Pro-TGG-1-1	0	0	0	1	0	0	0	0	0	0	0	0	0	0	0	0	0	0	0	0	0	0	0	0	0	0	0
FBgn0011945_tRNA:Pro-TGG-1-2	FBgn0011945	transfer RNA:Proline-TGG 1-2	tRNA:Pro-TGG-1-2	0	0	0	1	0	0	0	0	0	1	0	0	1	0	1	0	0	0	1	0	0	0	0	0	0	0	0
FBgn0011948_tRNA:Arg-TCG-3-1	FBgn0011948	transfer RNA:Arginine-TCG 3-1	tRNA:Arg-TCG-3-1	0	0	0	0	0	0	0	0	0	0	0	0	0	0	0	0	0	0	0	0	0	0	0	0	0	0	0
FBgn0011949_tRNA:Arg-TCG-3-2	FBgn0011949	transfer RNA:Arginine-TCG 3-2	tRNA:Arg-TCG-3-2	0	0	0	0	0	0	0	0	0	0	0	0	0	0	0	0	0	0	0	0	0	0	0	0	0	0	0
FBgn0011950_tRNA:Arg-TCG-3-3	FBgn0011950	transfer RNA:Arginine-TCG 3-3	tRNA:Arg-TCG-3-3	0	0	0	0	0	0	0	0	0	0	0	0	0	0	0	0	0	0	0	0	0	0	0	0	0	0	0
FBgn0011951_tRNA:Arg-TCG-3-4	FBgn0011951	transfer RNA:Arginine-TCG 3-4	tRNA:Arg-TCG-3-4	0	0	0	0	0	0	0	0	0	0	0	0	0	0	0	0	0	0	0	0	0	0	0	0	0	0	0
FBgn0011952_tRNA:Arg-TCG-2-1	FBgn0011952	transfer RNA:Arginine-TCG 2-1	tRNA:Arg-TCG-2-1	0	1	0	0	0	0	0	0	0	0	0	0	0	0	0	0	0	0	0	0	0	0	0	0	0	0	0
FBgn0011953_tRNA:Arg-TCG-1-1	FBgn0011953	transfer RNA:Arginine-TCG 1-1	tRNA:Arg-TCG-1-1	0	0	0	0	0	0	0	0	0	0	0	0	0	0	0	0	0	0	0	0	0	0	0	0	0	0	0
FBgn0011954_tRNA:Arg-TCG-2-2	FBgn0011954	transfer RNA:Arginine-TCG 2-2	tRNA:Arg-TCG-2-2	0	0	1	0	0	0	0	0	0	0	0	0	0	0	0	0	0	0	0	0	0	0	0	0	0	0	0
FBgn0011955_tRNA:Arg-ACG-1-5	FBgn0011955	transfer RNA:Arginine-ACG 1-5	tRNA:Arg-ACG-1-5	0	0	0	0	0	0	0	0	0	0	0	0	0	0	0	0	0	0	0	0	0	0	0	0	0	0	0
FBgn0011956_tRNA:Arg-ACG-1-3	FBgn0011956	transfer RNA:Arginine-ACG 1-3	tRNA:Arg-ACG-1-3	0	0	0	0	0	0	0	0	0	0	0	0	0	0	0	0	0	0	0	0	0	0	0	0	0	0	0
FBgn0011957_tRNA:Arg-ACG-1-2	FBgn0011957	transfer RNA:Arginine-ACG 1-2	tRNA:Arg-ACG-1-2	0	0	0	0	0	0	0	0	0	0	0	0	0	0	0	0	0	0	0	0	0	0	0	0	0	0	0
FBgn0011958_tRNA:Arg-ACG-1-1	FBgn0011958	transfer RNA:Arginine-ACG 1-1	tRNA:Arg-ACG-1-1	0	0	0	0	0	0	0	0	0	0	0	0	0	0	0	0	0	0	0	0	0	1	0	0	0	0	0
FBgn0011959_tRNA:Arg-ACG-1-10	FBgn0011959	transfer RNA:Arginine-ACG 1-10	tRNA:Arg-ACG-1-10	0	0	0	0	0	0	0	0	0	0	0	0	0	0	0	0	0	0	0	0	0	0	0	0	0	0	0
FBgn0011960_tRNA:Arg-ACG-1-9	FBgn0011960	transfer RNA:Arginine-ACG 1-9	tRNA:Arg-ACG-1-9	0	0	1	0	0	0	0	0	0	0	0	0	0	0	0	0	0	0	0	0	0	0	0	0	0	0	0
FBgn0011961_tRNA:Arg-ACG-1-8	FBgn0011961	transfer RNA:Arginine-ACG 1-8	tRNA:Arg-ACG-1-8	0	0	0	0	0	0	0	0	0	0	0	0	0	0	0	0	0	0	0	0	0	0	0	0	0	0	0
FBgn0011962_tRNA:Arg-ACG-1-7	FBgn0011962	transfer RNA:Arginine-ACG 1-7	tRNA:Arg-ACG-1-7	0	0	0	0	0	0	0	0	0	0	0	0	0	0	0	0	0	0	0	0	0	0	0	0	0	0	0
FBgn0011963_tRNA:Arg-ACG-1-6	FBgn0011963	transfer RNA:Arginine-ACG 1-6	tRNA:Arg-ACG-1-6	0	0	0	0	0	0	1	0	0	0	0	0	0	0	0	0	0	0	0	0	0	0	0	0	0	0	0
FBgn0011965_tRNA:Arg-TCG-4-1	FBgn0011965	transfer RNA:Arginine-TCG 4-1	tRNA:Arg-TCG-4-1	0	0	0	0	0	0	0	0	0	0	0	0	0	0	0	0	0	0	0	0	0	0	0	0	0	0	0
FBgn0011966_tRNA:Arg-TCG-2-3	FBgn0011966	transfer RNA:Arginine-TCG 2-3	tRNA:Arg-TCG-2-3	0	0	0	0	0	0	0	0	0	0	0	0	0	0	0	0	0	0	0	0	0	0	0	0	0	0	0
FBgn0011970_tRNA:Ser-GCT-2-1	FBgn0011970	transfer RNA:Serine-GCT 2-1	tRNA:Ser-GCT-2-1	1	0	0	0	0	0	0	0	0	0	0	0	0	0	0	0	0	0	0	0	0	0	0	0	0	0	0
FBgn0011971_tRNA:Ser-GCT-2-2	FBgn0011971	transfer RNA:Serine-GCT 2-2	tRNA:Ser-GCT-2-2	0	0	0	0	0	0	0	0	0	0	0	0	0	0	0	0	0	0	0	0	0	0	0	0	0	1	0
FBgn0011974_tRNA:Ser-AGA-1-1	FBgn0011974	transfer RNA:Serine-AGA 1-1	tRNA:Ser-AGA-1-1	1	0	0	0	0	0	0	1	1	0	1	1	0	1	2	0	0	0	0	0	0	0	0	0	0	0	0
FBgn0011975_tRNA:Ser-CGA-1-1	FBgn0011975	transfer RNA:Serine-CGA 1-1	tRNA:Ser-CGA-1-1	0	1	0	1	0	1	0	0	0	0	0	0	0	0	0	0	1	0	0	0	0	0	0	1	1	0	0
FBgn0011976_tRNA:Ser-CGA-1-2	FBgn0011976	transfer RNA:Serine-CGA 1-2	tRNA:Ser-CGA-1-2	0	0	0	0	0	0	0	0	0	0	0	0	0	0	0	0	0	0	0	0	0	0	0	0	0	0	0
FBgn0011977_tRNA:Ser-CGA-1-3	FBgn0011977	transfer RNA:Serine-CGA 1-3	tRNA:Ser-CGA-1-3	0	0	0	0	0	0	0	0	0	0	0	0	0	0	0	0	0	0	0	0	0	0	0	0	0	0	0
FBgn0011980_tRNA:Ser-AGA-3-1	FBgn0011980	transfer RNA:Serine-AGA 3-1	tRNA:Ser-AGA-3-1	2	0	2	0	0	0	2	0	0	0	0	0	2	3	4	0	1	2	0	1	1	1	1	2	2	1	0
FBgn0011981_tRNA:Ser-AGA-3-2	FBgn0011981	transfer RNA:Serine-AGA 3-2	tRNA:Ser-AGA-3-2	0	1	0	0	0	0	0	0	0	0	1	2	0	0	0	0	0	0	0	0	0	0	0	0	0	1	0
FBgn0011982_tRNA:Ser-AGA-2-1	FBgn0011982	transfer RNA:Serine-AGA 2-1	tRNA:Ser-AGA-2-1	2	1	2	4	0	1	2	0	0	2	0	1	0	1	2	0	0	1	0	1	1	0	1	1	2	1	1
FBgn0011983_tRNA:Ser-AGA-2-2	FBgn0011983	transfer RNA:Serine-AGA 2-2	tRNA:Ser-AGA-2-2	0	0	0	0	0	0	0	0	0	0	0	0	0	0	0	0	0	0	0	0	0	0	0	0	0	0	0
FBgn0011984_tRNA:Ser-AGA-2-4	FBgn0011984	transfer RNA:Serine-AGA 2-4	tRNA:Ser-AGA-2-4	0	0	0	0	0	0	0	0	0	0	0	0	0	0	0	0	0	0	0	0	0	0	0	0	0	0	0
FBgn0011985_tRNA:Ser-AGA-2-3	FBgn0011985	transfer RNA:Serine-AGA 2-3	tRNA:Ser-AGA-2-3	0	0	0	0	0	0	0	0	0	0	0	0	0	0	0	0	0	0	0	0	0	0	0	0	0	0	0
FBgn0011986_tRNA:Ser-AGA-2-5	FBgn0011986	transfer RNA:Serine-AGA 2-5	tRNA:Ser-AGA-2-5	0	0	0	0	0	0	0	0	0	0	0	0	0	0	0	0	0	0	0	0	0	0	0	0	0	0	0
FBgn0011987_tRNA:SeC-TCA-1-1	FBgn0011987	transfer RNA:Selenocysteine-TCA 1-1	tRNA:SeC-TCA-1-1	0	0	0	0	0	0	1	0	0	0	2	0	0	0	0	0	0	0	0	0	0	0	0	0	0	0	0
FBgn0011993_tRNA:Thr-AGT-1-5	FBgn0011993	transfer RNA:Threonine-AGT 1-5	tRNA:Thr-AGT-1-5	0	0	0	0	0	0	0	0	0	0	1	0	0	0	0	0	1	0	0	0	0	0	0	0	0	1	0
FBgn0011994_tRNA:Thr-AGT-1-6	FBgn0011994	transfer RNA:Threonine-AGT 1-6	tRNA:Thr-AGT-1-6	1	0	0	0	0	0	0	0	0	0	0	0	0	0	0	0	0	0	0	0	0	0	0	0	0	0	0
FBgn0011998_tRNA:Val-CAC-2-2	FBgn0011998	transfer RNA:Valine-CAC 2-2	tRNA:Val-CAC-2-2	0	0	0	0	0	0	0	0	0	0	0	0	0	0	0	0	0	0	0	0	0	0	0	0	0	0	0
FBgn0011999_tRNA:Val-CAC-2-1	FBgn0011999	transfer RNA:Valine-CAC 2-1	tRNA:Val-CAC-2-1	0	0	1	0	0	0	0	0	0	0	0	0	0	0	0	0	0	0	0	0	0	0	0	0	0	0	0
FBgn0012000_tRNA:Val-CAC-2-3	FBgn0012000	transfer RNA:Valine-CAC 2-3	tRNA:Val-CAC-2-3	0	0	0	0	0	0	0	0	0	0	0	0	0	0	0	0	0	0	0	0	0	0	0	0	0	0	0
FBgn0012001_tRNA:Val-CAC-2-4	FBgn0012001	transfer RNA:Valine-CAC 2-4	tRNA:Val-CAC-2-4	0	0	0	0	0	0	0	0	0	0	0	0	0	0	0	0	0	0	0	0	0	0	0	0	0	0	0
FBgn0012002_tRNA:Val-CAC-1-1	FBgn0012002	transfer RNA:Valine-CAC 1-1	tRNA:Val-CAC-1-1	0	0	0	0	0	0	0	0	0	0	0	0	0	0	0	0	0	0	0	0	0	0	0	0	0	0	0
FBgn0012003_tRNA:Val-CAC-2-5	FBgn0012003	transfer RNA:Valine-CAC 2-5	tRNA:Val-CAC-2-5	0	0	0	0	0	0	0	0	0	0	0	0	0	0	0	0	0	0	0	0	0	0	0	0	0	0	0
FBgn0012004_tRNA:Val-CAC-2-6	FBgn0012004	transfer RNA:Valine-CAC 2-6	tRNA:Val-CAC-2-6	0	0	0	0	0	0	0	0	0	0	0	0	0	0	0	0	0	0	0	0	0	0	0	0	0	0	0
FBgn0012009_tRNA:Val-AAC-2-4	FBgn0012009	transfer RNA:Valine-AAC 2-4	tRNA:Val-AAC-2-4	0	0	0	0	0	0	0	0	0	0	0	0	0	0	0	0	0	0	0	0	0	0	0	0	0	0	0
FBgn0012010_tRNA:Val-AAC-2-3	FBgn0012010	transfer RNA:Valine-AAC 2-3	tRNA:Val-AAC-2-3	0	0	0	0	0	0	0	0	0	0	0	0	0	0	0	0	0	0	0	0	0	0	1	0	0	0	0
FBgn0012011_tRNA:Val-AAC-1-1	FBgn0012011	transfer RNA:Valine-AAC 1-1	tRNA:Val-AAC-1-1	0	0	0	0	0	0	0	0	0	0	0	0	0	0	0	0	0	0	0	0	0	0	0	0	0	0	0
FBgn0012016_tRNA:Tyr-GTA-1-3	FBgn0012016	transfer RNA:Tyrosine-GTA 1-3	tRNA:Tyr-GTA-1-3	0	0	0	0	0	0	0	0	0	0	0	0	0	0	0	0	0	0	0	0	2	0	0	0	0	2	0
FBgn0012017_tRNA:Tyr-GTA-1-2	FBgn0012017	transfer RNA:Tyrosine-GTA 1-2	tRNA:Tyr-GTA-1-2	0	0	0	0	0	0	0	0	0	0	0	0	0	0	0	0	0	0	0	0	0	0	0	0	0	0	0
FBgn0012018_tRNA:Tyr-GTA-3-1	FBgn0012018	transfer RNA:Tyrosine-GTA 3-1	tRNA:Tyr-GTA-3-1	0	1	0	0	0	0	0	0	0	0	0	0	0	0	0	0	0	0	0	0	0	0	0	0	0	0	0
FBgn0012024_tRNA:Tyr-GTA-1-8	FBgn0012024	transfer RNA:Tyrosine-GTA 1-8	tRNA:Tyr-GTA-1-8	0	0	1	2	0	0	0	0	0	1	0	0	0	0	0	1	1	0	0	2	1	0	0	1	0	1	0
FBgn0012025_tRNA:Tyr-GTA-1-7	FBgn0012025	transfer RNA:Tyrosine-GTA 1-7	tRNA:Tyr-GTA-1-7	2	1	3	2	1	0	0	0	1	0	0	0	0	0	0	0	0	0	0	0	1	1	1	1	3	1	0
FBgn0012026_tRNA:Tyr-GTA-1-6	FBgn0012026	transfer RNA:Tyrosine-GTA 1-6	tRNA:Tyr-GTA-1-6	2	1	0	3	1	0	1	0	0	2	2	1	3	0	1	3	0	0	0	0	0	0	1	3	3	1	0
FBgn0012027_tRNA:Tyr-GTA-1-5	FBgn0012027	transfer RNA:Tyrosine-GTA 1-5	tRNA:Tyr-GTA-1-5	0	1	1	0	1	1	0	0	0	0	0	0	0	0	0	0	0	1	0	0	0	0	0	0	0	0	0
FBgn0012028_tRNA:Tyr-GTA-1-4	FBgn0012028	transfer RNA:Tyrosine-GTA 1-4	tRNA:Tyr-GTA-1-4	0	0	0	1	0	0	0	0	0	0	0	0	0	1	0	0	0	0	0	0	0	0	0	1	1	0	0
FBgn0012034_AcCoAS	FBgn0012034	Acetyl Coenzyme A synthase	AcCoAS	389	257	881	972	339	618	411	691	548	343	337	567	510	408	444	336	316	460	613	305	429	292	393	633	265	276	342
FBgn0012036_Aldh	FBgn0012036	Aldehyde dehydrogenase	Aldh	2862	1669	2546	2933	878	1435	1973	1102	784	604	730	984	1434	1030	958	1336	1384	1678	1349	839	1123	1072	985	1920	2155	1588	1406
FBgn0012037_Ance	FBgn0012037	Angiotensin converting enzyme	Ance	2849	1816	2801	5526	2554	3819	2961	3928	2858	2418	2613	3497	4305	3378	3330	3062	2977	4250	3396	3535	3933	2902	2929	4113	3132	3430	3098
FBgn0012042_AttA	FBgn0012042	Attacin-A	AttA	1	5	22	48	10	7	37	49	7	31	18	39	22	2	9	66	0	2	10	11	4	0	4	1	3	0	9
FBgn0012051_CalpA	FBgn0012051	Calpain-A	CalpA	53	55	81	57	23	59	63	49	60	37	23	57	75	53	59	17	19	42	46	16	42	12	28	23	27	18	18
FBgn0012058_Cdc27	FBgn0012058	Cell division cycle 27 ortholog	Cdc27	63	61	58	57	38	33	38	66	35	38	31	59	68	58	43	28	31	42	41	34	36	23	20	38	20	29	26
FBgn0012344_Dh44	FBgn0012344	Diuretic hormone 44	Dh44	4	4	0	11	2	1	5	8	0	0	0	2	0	0	0	2	0	0	4	2	1	1	2	1	0	0	0
FBgn0013263_Trl	FBgn0013263	Trithorax-like	Trl	39	47	51	44	19	38	16	31	32	23	25	31	47	30	37	31	17	32	23	31	33	19	28	13	13	24	22
FBgn0013269_FK506-bp1	FBgn0013269	FK506-binding protein 1	FK506-bp1	831	412	440	297	100	180	286	297	213	145	153	269	269	188	214	87	67	163	216	84	143	143	132	136	147	146	126
FBgn0013272_Gp150	FBgn0013272	Gp150	Gp150	3944	2920	4156	2954	1160	3556	2406	3268	3239	2480	2158	4025	6313	3530	4786	941	843	2839	3986	830	2370	566	848	1120	952	611	1916
FBgn0013275_Hsp70Aa	FBgn0013275	Heat-shock-protein-70Aa	Hsp70Aa	36	104	63	9	9	26	13	4	28	7	3	24	15	9	19	5	5	15	6	2	8	9	13	2	0	3	20
FBgn0013276_Hsp70Ab	FBgn0013276	Heat-shock-protein-70Ab	Hsp70Ab	67	146	106	32	9	33	24	13	28	15	10	61	27	35	54	8	16	30	9	7	13	10	14	16	3	23	22
FBgn0013277_Hsp70Ba	FBgn0013277	Heat-shock-protein-70Ba	Hsp70Ba	6	5	2	0	0	0	0	0	1	0	0	2	0	0	0	0	2	0	0	0	2	1	0	0	0	0	0
FBgn0013278_Hsp70Bb	FBgn0013278	Heat-shock-protein-70Bb	Hsp70Bb	48	46	42	16	6	10	10	8	3	4	4	29	7	3	7	8	7	13	0	6	8	16	8	6	3	4	9
FBgn0013279_Hsp70Bc	FBgn0013279	Heat-shock-protein-70Bc	Hsp70Bc	186	317	260	23	19	94	47	14	62	8	8	163	36	30	105	22	17	73	35	3	25	20	20	33	8	22	68
FBgn0013300_ProtA	FBgn0013300	Protamine A	ProtA	0	0	0	0	0	0	0	0	0	0	0	0	0	0	0	0	0	0	0	0	0	0	0	0	0	0	0
FBgn0013301_ProtB	FBgn0013301	Protamine B	ProtB	0	0	0	0	0	0	0	0	0	0	0	0	0	1	0	0	0	0	0	0	0	0	0	0	0	0	0
FBgn0013303_Nca	FBgn0013303	Neurocalcin	Nca	14	25	29	44	18	28	47	28	28	12	19	19	33	28	20	16	19	17	35	21	14	12	28	24	33	25	18
FBgn0013305_Nmda1	FBgn0013305	N-methyl-D-aspartate receptor-associated protein	Nmda1	290	294	430	423	140	291	297	332	246	247	207	308	355	270	317	158	102	198	300	160	191	205	205	211	160	161	129
FBgn0013307_Odc1	FBgn0013307	Ornithine decarboxylase 1	Odc1	0	1	0	0	0	1	0	0	0	0	0	0	1	0	0	1	0	1	0	2	0	0	0	0	0	0	0
FBgn0013308_Odc2	FBgn0013308	Ornithine decarboxylase 2	Odc2	0	0	1	1	0	0	0	0	0	0	0	0	0	0	0	0	0	0	0	0	0	0	0	0	0	0	0
FBgn0013323_Ptth	FBgn0013323	Prothoracicotropic hormone	Ptth	2	1	0	3	1	1	7	2	2	2	4	6	8	9	13	1	2	1	7	1	6	5	5	6	9	3	4
FBgn0013325_RpL11	FBgn0013325	Ribosomal protein L11	RpL11	5573	3838	5397	8423	2572	3967	11818	5491	4068	3299	3680	4986	7809	6426	6582	3295	3077	3989	5454	3954	4068	3660	4040	4809	7748	5548	3743
FBgn0013334_Sap47	FBgn0013334	Synapse-associated protein 47kD	Sap47	301	222	304	399	175	239	174	342	244	203	190	296	273	277	267	175	127	299	208	169	233	160	153	201	141	150	160
FBgn0013342_nSyb	FBgn0013342	neuronal Synaptobrevin	nSyb	12	20	14	23	5	15	21	16	4	9	13	14	23	18	20	18	7	15	16	8	13	11	12	9	9	3	8
FBgn0013343_Syx1A	FBgn0013343	Syntaxin 1A	Syx1A	567	434	513	455	219	517	305	461	444	379	306	492	624	532	522	160	133	412	377	136	355	119	145	177	134	114	305
FBgn0013347_TfIIA-S	FBgn0013347	Transcription-factor-IIA-S	TfIIA-S	215	192	208	307	155	148	379	188	146	140	131	160	339	290	210	107	133	184	195	114	159	110	97	133	209	245	179
FBgn0013348_TpnC41C	FBgn0013348	Troponin C at 41C	TpnC41C	0	0	0	0	2	0	2	2	0	0	3	0	0	0	0	1	0	0	1	1	1	0	0	0	0	0	0
FBgn0013432_bcn92	FBgn0013432	bcn92	bcn92	44	39	41	15	6	8	36	16	14	8	9	20	20	21	21	13	7	24	29	3	8	4	10	18	11	9	9
FBgn0013433_beat-Ia	FBgn0013433	beaten path Ia	beat-Ia	0	1	0	1	1	0	1	0	0	0	1	0	0	1	0	0	0	0	0	0	0	0	0	0	0	1	0
FBgn0013435_Cdc2rk	FBgn0013435	Cdc2-related kinase	Cdc2rk	17	9	12	9	7	5	2	8	8	10	3	17	13	6	11	4	3	11	8	4	4	5	4	10	5	6	8
FBgn0013467_igl	FBgn0013467	igloo	igl	2	0	0	0	0	0	0	0	1	0	0	0	3	0	0	0	0	0	0	0	0	0	0	0	1	0	0
FBgn0013469_klu	FBgn0013469	klumpfuss	klu	205	115	178	103	28	138	34	120	123	105	96	137	91	90	117	69	26	124	21	25	91	37	41	53	14	17	65
FBgn0013531_MED20	FBgn0013531	Mediator complex subunit 20	MED20	19	24	31	33	5	22	23	25	16	23	16	26	32	36	31	18	14	22	28	5	16	12	16	10	14	9	15
FBgn0013548_l(2)dtl	FBgn0013548	lethal-(2)-denticleless	l(2)dtl	45	31	26	16	8	16	16	19	15	9	16	21	26	13	19	4	8	19	19	13	11	9	5	10	12	10	7
FBgn0013563_Pex1	FBgn0013563	Peroxin 1	Pex1	12	22	18	15	10	11	6	10	11	9	6	9	5	13	9	9	9	10	8	11	13	7	11	9	4	6	7
FBgn0013576_mtd	FBgn0013576	mustard	mtd	1321	1158	1604	1075	534	932	557	944	856	645	654	929	1050	818	940	459	408	916	665	388	743	315	393	502	299	253	459
FBgn0013672_mt:ATPase6	FBgn0013672	mitochondrial ATPase subunit 6	mt:ATPase6	26867	35699	44075	66145	19259	23490	61807	24062	20704	13076	12752	17993	23014	21847	20037	31525	30688	30575	34310	32464	24162	25116	28693	26193	53289	42553	22659
FBgn0013673_mt:ATPase8	FBgn0013673	mitochondrial ATPase subunit 8	mt:ATPase8	8	26	43	52	14	15	68	7	16	5	9	7	7	7	8	19	17	22	4	15	3	11	15	5	60	11	4
FBgn0013674_mt:CoI	FBgn0013674	mitochondrial Cytochrome c oxidase subunit I	mt:CoI	21613	27517	41517	51412	16766	27881	41733	25540	23271	14143	15052	22727	26238	19933	18513	26463	22966	30683	51352	28206	26135	20315	27892	25757	33860	27888	18355
FBgn0013675_mt:CoII	FBgn0013675	mitochondrial Cytochrome c oxidase subunit II	mt:CoII	50134	48033	74314	119890	32186	49214	102480	47588	37116	24586	26389	40504	40201	32296	30824	53270	43727	50775	49809	53714	43599	47085	52564	53604	101419	47955	30908
FBgn0013676_mt:CoIII	FBgn0013676	mitochondrial Cytochrome c oxidase subunit III	mt:CoIII	25884	48234	64506	92709	30911	48348	69579	45098	39322	25546	24572	30484	45309	34882	30441	51653	40397	53604	46192	55093	42637	40872	47445	33195	52119	40712	31243
FBgn0013678_mt:Cyt-b	FBgn0013678	mitochondrial Cytochrome b	mt:Cyt-b	26087	32858	49844	74515	21188	35699	66315	37365	29096	19512	18917	28843	36602	27045	22571	37279	27839	36918	39235	40818	32751	35146	39830	32750	60206	34254	23485
FBgn0013679_mt:ND1	FBgn0013679	mitochondrial NADH-ubiquinone oxidoreductase chain 1	mt:ND1	11512	15842	23855	28747	7890	12235	21961	7291	10171	4018	5430	5704	6167	4104	5867	12252	11994	12233	11479	10976	7093	7093	16109	4581	26371	5063	3173
FBgn0013680_mt:ND2	FBgn0013680	mitochondrial NADH-ubiquinone oxidoreductase chain 2	mt:ND2	328	696	676	712	199	225	484	159	216	136	117	115	147	106	167	309	303	291	174	305	215	255	332	136	610	227	103
FBgn0013681_mt:ND3	FBgn0013681	mitochondrial NADH-ubiquinone oxidoreductase chain 3	mt:ND3	58	402	546	589	168	220	700	150	292	96	88	74	140	216	157	274	206	350	41	296	160	257	562	74	368	147	83
FBgn0013683_mt:ND4L	FBgn0013683	mitochondrial NADH-ubiquinone oxidoreductase chain 4L	mt:ND4L	115	172	159	187	55	99	169	94	83	46	39	45	64	71	91	86	72	97	69	100	79	69	76	59	165	72	49
FBgn0013684_mt:ND5	FBgn0013684	mitochondrial NADH-ubiquinone oxidoreductase chain 5	mt:ND5	1162	3890	6120	4736	1833	2818	2782	1424	3168	1133	1653	752	1789	1160	1135	3817	2446	3522	3278	3505	1179	1982	6529	656	3086	883	766
FBgn0013685_mt:ND6	FBgn0013685	mitochondrial NADH-ubiquinone oxidoreductase chain 6	mt:ND6	63	215	276	364	84	103	327	63	94	56	40	35	76	86	78	152	134	164	22	124	71	108	184	48	306	136	70
FBgn0013686_mt:lrRNA	FBgn0013686	mitochondrial large ribosomal RNA	mt:lrRNA	91998	686114	1129157	1560219	374840	833763	1223964	588836	738159	386558	297216	287915	576384	499573	402855	866429	483658	921351	705647	963009	474841	705470	1097678	160072	907992	198132	216212
FBgn0013688_mt:srRNA	FBgn0013688	mitochondrial small ribosomal RNA	mt:srRNA	4408	12516	20259	31809	7485	14711	5201	16681	12510	8603	8749	5995	5431	3509	5268	17791	9500	15687	3506	21164	8793	14355	21404	3298	4343	2616	2870
FBgn0013689_mt:tRNA:Ala-TGC	FBgn0013689	mitochondrial transfer RNA:Alanine-TGC	mt:tRNA:Ala-TGC	799	868	1015	1564	411	534	1100	644	398	314	346	429	567	453	526	618	547	684	200	617	470	504	577	494	897	493	306
FBgn0013690_mt:tRNA:Cys-GCA	FBgn0013690	mitochondrial transfer RNA:Cysteine-GCA	mt:tRNA:Cys-GCA	100	223	260	495	92	102	170	123	77	71	65	68	37	33	111	137	136	147	12	139	106	148	147	53	176	64	28
FBgn0013691_mt:tRNA:Asp-GTC	FBgn0013691	mitochondrial transfer RNA:Aspartic acid-GTC	mt:tRNA:Asp-GTC	0	10	8	37	10	10	49	11	5	2	3	1	5	3	4	7	13	7	0	6	2	14	9	2	9	1	0
FBgn0013692_mt:tRNA:Glu-TTC	FBgn0013692	mitochondrial transfer RNA:Glutamic acid-TTC	mt:tRNA:Glu-TTC	2	6	5	31	4	4	54	2	3	2	4	4	4	5	3	9	6	7	0	8	3	10	10	3	17	7	4
FBgn0013693_mt:tRNA:Phe-GAA	FBgn0013693	mitochondrial transfer RNA:Phenylalanine-GAA	mt:tRNA:Phe-GAA	12	24	30	26	12	1	28	11	8	7	10	3	14	5	14	3	18	12	7	22	7	10	15	5	14	24	7
FBgn0013694_mt:tRNA:Gly-TCC	FBgn0013694	mitochondrial transfer RNA:Glycine-TCC	mt:tRNA:Gly-TCC	14	37	55	162	31	31	194	46	49	39	16	27	41	48	40	48	43	46	22	63	39	42	60	21	145	69	30
FBgn0013695_mt:tRNA:His-GTG	FBgn0013695	mitochondrial transfer RNA:Histidine-GTG	mt:tRNA:His-GTG	101	269	231	666	117	116	365	121	81	52	57	39	33	71	86	154	206	162	13	183	83	110	127	55	232	180	32
FBgn0013696_mt:tRNA:Ile-GAT	FBgn0013696	mitochondrial transfer RNA:Isoleucine-GAT	mt:tRNA:Ile-GAT	6	13	17	28	2	7	21	3	5	2	1	4	8	6	9	4	9	5	3	3	5	3	7	3	28	15	1
FBgn0013697_mt:tRNA:Lys-CTT	FBgn0013697	mitochondrial transfer RNA:Lysine-CTT	mt:tRNA:Lys-CTT	156	290	261	430	116	100	490	122	106	79	63	74	101	128	117	171	176	149	59	153	101	126	163	79	371	229	77
FBgn0013698_mt:tRNA:Leu-TAG	FBgn0013698	mitochondrial transfer RNA:Leucine-TAG	mt:tRNA:Leu-TAG	4	22	35	131	28	17	124	25	28	10	19	16	9	13	20	25	22	26	5	32	17	21	24	11	60	30	4
FBgn0013699_mt:tRNA:Leu-TAA	FBgn0013699	mitochondrial transfer RNA:Leucine-TAA	mt:tRNA:Leu-TAA	4	4	3	20	1	5	14	6	1	2	3	3	4	9	3	5	3	5	1	10	6	1	6	5	11	6	3
FBgn0013700_mt:tRNA:Met-CAT	FBgn0013700	mitochondrial transfer RNA:Methionine-CAT	mt:tRNA:Met-CAT	10	23	28	124	37	8	185	30	18	7	13	9	6	12	25	35	33	24	2	28	13	26	29	5	98	46	5
FBgn0013701_mt:tRNA:Asn-GTT	FBgn0013701	mitochondrial transfer RNA:Asparagine-GTT	mt:tRNA:Asn-GTT	39	46	44	96	28	31	76	26	18	17	16	17	4	12	14	27	33	36	0	25	15	23	26	18	54	30	12
FBgn0013702_mt:tRNA:Pro-TGG	FBgn0013702	mitochondrial transfer RNA:Proline-TGG	mt:tRNA:Pro-TGG	22	14	31	37	4	14	23	10	6	2	10	7	5	3	9	14	10	12	14	12	9	8	19	9	11	4	2
FBgn0013703_mt:tRNA:Gln-TTG	FBgn0013703	mitochondrial transfer RNA:Glutamine-TTG	mt:tRNA:Gln-TTG	1	4	8	65	9	10	118	22	23	10	4	9	16	9	29	15	16	11	3	23	16	23	18	10	69	24	5
FBgn0013704_mt:tRNA:Arg-TCG	FBgn0013704	mitochondrial transfer RNA:Arginine-TCG	mt:tRNA:Arg-TCG	919	1500	1703	4755	1143	900	5357	1415	950	698	719	586	691	1028	1152	1173	1290	1061	299	1481	841	1144	1288	688	2780	1870	532
FBgn0013705_mt:tRNA:Ser-GCT	FBgn0013705	mitochondrial transfer RNA:Serine-GCT	mt:tRNA:Ser-GCT	2312	5091	5471	16116	3449	2867	16654	3084	2545	1545	1630	1523	1889	2679	3238	4259	5250	3953	668	4589	2548	3392	4058	1945	13311	5520	1709
FBgn0013706_mt:tRNA:Ser-TGA	FBgn0013706	mitochondrial transfer RNA:Serine-TGA	mt:tRNA:Ser-TGA	1	2	2	5	0	2	3	2	4	1	2	3	1	2	1	2	0	2	1	2	2	5	2	1	8	6	0
FBgn0013707_mt:tRNA:Thr-TGT	FBgn0013707	mitochondrial transfer RNA:Threonine-TGT	mt:tRNA:Thr-TGT	1	3	0	3	1	0	10	5	1	1	1	0	3	1	2	3	6	0	1	1	1	0	2	1	1	4	0
FBgn0013708_mt:tRNA:Val-TAC	FBgn0013708	mitochondrial transfer RNA:Valine-TAC	mt:tRNA:Val-TAC	11	15	12	90	28	14	86	45	18	6	16	14	9	12	7	20	19	29	3	22	18	33	24	8	40	12	3
FBgn0013709_mt:tRNA:Trp-TCA	FBgn0013709	mitochondrial transfer RNA:Tryptophan-TCA	mt:tRNA:Trp-TCA	7	7	19	27	5	11	30	8	9	4	7	7	5	7	4	10	10	13	7	12	8	12	11	9	18	7	3
FBgn0013710_mt:tRNA:Tyr-GTA	FBgn0013710	mitochondrial transfer RNA:Tyrosine-GTA	mt:tRNA:Tyr-GTA	29	52	48	46	16	9	30	8	10	6	14	8	13	11	5	26	8	16	1	14	11	9	23	5	25	10	5
FBgn0013717_not	FBgn0013717	non-stop	not	71	68	71	79	33	40	46	59	35	47	50	27	50	48	48	42	36	57	34	34	43	30	27	48	34	54	33
FBgn0013718_nuf	FBgn0013718	nuclear fallout	nuf	56	44	64	75	25	49	44	56	48	42	25	47	43	49	58	23	18	56	28	21	30	15	18	27	9	15	26
FBgn0013720_pck	FBgn0013720	pickel	pck	12	10	8	12	5	7	17	11	11	8	10	9	12	20	15	9	5	11	9	6	5	6	4	4	7	7	6
FBgn0013725_phyl	FBgn0013725	phyllopod	phyl	0	1	0	1	0	1	0	0	0	0	0	0	2	0	0	0	0	0	3	1	0	0	0	0	0	0	1
FBgn0013726_pnut	FBgn0013726	peanut	pnut	156	109	135	242	87	108	130	145	108	92	60	104	145	119	129	64	69	59	122	62	71	58	55	75	64	105	70
FBgn0013732_sced	FBgn0013732	scrambled	sced	6	4	3	2	1	2	3	2	0	1	0	2	1	5	2	4	0	4	0	3	2	1	1	1	1	2	2
FBgn0013733_shot	FBgn0013733	short stop	shot	591	542	781	633	233	783	370	520	715	481	473	766	729	785	739	169	153	574	180	120	361	108	216	193	154	103	302
FBgn0013746_alien	FBgn0013746	alien	alien	107	81	98	92	30	50	84	68	48	40	37	51	74	71	64	35	35	48	52	36	44	29	40	54	32	43	47
FBgn0013749_Arf102F	FBgn0013749	ADP ribosylation factor at 102F	Arf102F	1056	1081	1365	1773	617	968	1268	1048	697	645	572	818	1254	964	787	772	723	887	1254	888	966	1007	892	1128	1489	1195	882
FBgn0013750_Arf51F	FBgn0013750	ADP ribosylation factor at 51F	Arf51F	181	149	208	203	60	124	142	139	114	93	83	126	173	151	146	85	75	103	94	81	107	72	82	92	93	95	113
FBgn0013751_Awh	FBgn0013751	Arrowhead	Awh	0	1	0	0	1	0	1	0	1	0	0	1	0	0	1	0	0	0	0	0	0	0	1	0	0	0	1
FBgn0013753_Bgb	FBgn0013753	Big brother	Bgb	8	1	5	15	3	5	12	2	2	0	1	3	3	5	1	5	3	3	5	5	2	5	6	2	7	8	0
FBgn0013755_Bro	FBgn0013755	Brother	Bro	0	0	0	0	0	0	0	0	0	0	0	0	0	0	0	0	0	0	0	0	0	0	0	0	0	0	0
FBgn0013756_Mtor	FBgn0013756	Megator	Mtor	231	184	179	89	51	144	45	87	98	100	92	107	121	111	124	31	36	117	26	18	61	11	31	31	25	16	50
FBgn0013759_CASK	FBgn0013759	CASK ortholog	CASK	74	57	60	93	25	73	23	75	55	54	46	59	82	50	55	32	28	80	64	34	53	21	24	54	32	19	34
FBgn0013762_Cdk5	FBgn0013762	Cyclin-dependent kinase 5	Cdk5	59	55	84	139	43	64	101	99	55	43	48	72	94	73	46	67	42	59	67	62	55	43	57	60	69	51	51
FBgn0013763_Idgf6	FBgn0013763	Imaginal disc growth factor 6	Idgf6	91	44	54	68	24	42	60	31	42	26	25	55	60	38	58	33	30	59	28	20	27	14	18	22	15	14	16
FBgn0013764_Chi	FBgn0013764	Chip	Chi	35	38	34	61	20	33	57	52	33	15	23	26	70	36	44	29	33	29	59	33	29	38	17	49	60	40	32
FBgn0013765_cnn	FBgn0013765	centrosomin	cnn	90	68	87	13	7	27	13	27	23	20	9	29	18	19	28	5	3	10	4	2	12	4	7	5	9	1	7
FBgn0013767_Crz	FBgn0013767	Corazonin	Crz	0	1	0	1	0	0	0	0	0	0	0	0	0	0	0	0	0	0	0	0	0	0	0	0	0	0	0
FBgn0013770_Cp1	FBgn0013770	Cysteine proteinase-1	Cp1	769	1047	1568	2964	1114	1517	1850	2318	1568	1315	1189	1562	1478	1371	1190	1382	1065	1373	1372	1613	1164	1247	1558	1690	1275	1169	950
FBgn0013771_Cyp6a9	FBgn0013771	Cytochrome P450-6a9	Cyp6a9	22	27	48	97	39	71	73	75	86	57	59	76	72	55	57	55	35	52	53	39	43	18	48	40	20	21	30
FBgn0013772_Cyp6a8	FBgn0013772	Cytochrome P450-6a8	Cyp6a8	24	23	43	42	23	24	51	28	11	13	23	32	33	35	33	35	33	43	122	68	65	57	95	28	734	498	362
FBgn0013773_Cyp6a22	FBgn0013773	Cyp6a22	Cyp6a22	3	1	3	2	0	1	0	2	1	0	0	0	2	0	1	0	0	0	2	0	0	1	2	0	0	0	0
FBgn0013799_Deaf1	FBgn0013799	Deformed epidermal autoregulatory factor-1	Deaf1	45	61	62	45	21	46	38	48	39	33	28	46	48	58	52	30	16	37	26	20	27	14	22	37	22	14	33
FBgn0013810_Dhc36C	FBgn0013810	Dynein heavy chain at 36C	Dhc36C	1	1	0	0	2	0	0	0	1	0	0	2	0	0	3	0	0	1	0	0	0	0	0	0	0	0	0
FBgn0013811_Dhc62B	FBgn0013811	Dynein heavy chain at 62B	Dhc62B	0	2	0	2	0	0	0	2	1	0	2	1	4	2	3	1	0	1	2	0	0	0	0	1	1	0	0
FBgn0013812_Dhc93AB	FBgn0013812	Dynein heavy chain at 93AB	Dhc93AB	0	0	1	0	0	0	1	0	0	0	0	0	0	1	0	0	0	0	0	0	1	0	0	0	0	0	0
FBgn0013813_Dhc98D	FBgn0013813	Dynein heavy chain at 89D	Dhc98D	0	0	0	1	0	0	0	1	0	0	0	2	0	0	0	0	0	0	0	1	0	0	0	0	0	0	0
FBgn0013949_Elal	FBgn0013949	Elastin-like	Elal	3	3	7	10	5	7	19	10	0	4	9	8	6	8	9	9	3	5	19	2	5	6	4	4	10	7	2
FBgn0013953_Esp	FBgn0013953	Epidermal stripes and patches	Esp	2	1	1	2	2	1	1	4	1	0	1	2	2	1	2	1	0	2	2	0	0	0	1	0	0	1	0
FBgn0013954_FK506-bp2	FBgn0013954	FK506-binding protein 2	FK506-bp2	1374	1004	1141	1114	381	754	1220	588	421	331	331	540	1172	850	853	452	605	632	1517	376	458	414	416	575	1498	1138	687
FBgn0013972_Gycalpha99B	FBgn0013972	Guanylyl cyclase alpha-subunit at 99B	Gycalpha99B	3	1	3	2	2	2	2	2	5	2	0	1	6	5	0	1	0	1	4	1	0	1	2	2	5	3	3
FBgn0013973_Gycbeta100B	FBgn0013973	Guanylyl cyclase beta-subunit at 100B	Gycbeta100B	3	3	4	4	0	1	0	2	1	1	0	0	0	0	1	1	1	0	1	0	0	0	0	0	0	1	3
FBgn0013981_His4r	FBgn0013981	Histone H4 replacement	His4r	791	651	854	2251	575	778	4115	1134	843	733	678	1030	1825	1507	1527	723	680	818	1782	831	844	923	962	936	2910	1654	845
FBgn0013983_imd	FBgn0013983	immune deficiency	imd	120	103	107	118	57	84	101	83	68	57	59	73	131	60	80	50	52	85	109	74	84	52	49	91	91	55	60
FBgn0013987_MAPk-Ak2	FBgn0013987	MAP kinase activated protein-kinase-2	MAPk-Ak2	218	154	244	251	107	202	318	213	188	144	125	204	291	293	202	109	95	161	239	96	120	95	103	124	129	134	168
FBgn0013995_Calx	FBgn0013995	Na/Ca-exchange protein	Calx	95	100	185	306	95	212	136	155	158	111	98	158	207	191	141	102	65	182	124	64	137	56	73	107	71	70	109
FBgn0013997_Nrx-IV	FBgn0013997	Neurexin IV	Nrx-IV	17	16	25	10	4	16	5	15	21	14	9	21	25	15	9	3	1	18	15	5	13	3	9	6	3	0	9
FBgn0014000_Hf	FBgn0014000	Helical Factor	Hf	4	3	5	10	2	5	27	17	10	8	12	15	30	16	23	10	2	13	10	11	10	5	2	5	15	3	7
FBgn0014002_Pdi	FBgn0014002	Protein disulfide isomerase	Pdi	1104	1067	1779	1921	682	1643	1317	1399	1060	1004	884	1569	2183	1552	1860	1096	947	1687	2392	1087	1623	1047	1067	1702	1124	1037	1427
FBgn0014006_Ask1	FBgn0014006	Apoptotic signal-regulating kinase 1	Ask1	368	272	341	282	139	243	150	270	208	135	121	219	260	233	201	172	153	242	175	141	195	129	143	198	115	100	120
FBgn0014007_Ptp69D	FBgn0014007	Protein tyrosine phosphatase 69D	Ptp69D	21	18	16	15	4	15	10	13	9	8	7	13	19	14	18	3	4	8	6	1	11	1	3	2	4	3	4
FBgn0014009_Rab2	FBgn0014009	Rab2	Rab2	357	290	457	560	212	435	409	529	339	312	295	501	571	386	444	247	224	337	542	219	318	233	262	383	271	233	270
FBgn0014010_Rab5	FBgn0014010	Rab5	Rab5	1023	904	1119	1381	589	1000	1057	1156	960	789	653	998	1379	1103	983	551	480	965	819	466	726	395	568	596	417	466	686
FBgn0014011_Rac2	FBgn0014011	Rac2	Rac2	949	800	1103	1224	489	934	643	1132	847	732	631	1189	1123	862	971	465	409	746	937	358	734	337	465	607	290	334	532
FBgn0014018_Rel	FBgn0014018	Relish	Rel	206	153	274	241	104	277	166	324	291	200	199	413	373	346	343	117	94	185	205	128	194	59	111	126	43	65	109
FBgn0014019_Rh5	FBgn0014019	Rhodopsin 5	Rh5	4	2	6	4	0	4	0	2	3	0	0	1	0	1	0	0	2	3	0	1	0	0	0	0	0	1	0
FBgn0014020_Rho1	FBgn0014020	Rho1	Rho1	2080	1568	1738	2256	946	1512	1137	1973	1225	1293	1056	1584	1641	1435	1403	764	579	1127	1172	670	980	593	653	788	530	687	903
FBgn0014022_Rlb1	FBgn0014022	Rlb1	Rlb1	62	41	43	32	9	22	22	25	28	25	12	27	38	39	46	12	9	26	15	11	19	5	6	19	8	8	12
FBgn0014023_mRpL47	FBgn0014023	mitochondrial ribosomal protein L47	mRpL47	505	415	455	268	82	128	293	159	97	107	83	133	214	163	160	114	107	174	162	154	164	114	130	143	247	191	98
FBgn0014024_Rnp4F	FBgn0014024	RNA-binding protein 4F	Rnp4F	266	154	157	125	54	118	73	122	112	68	70	140	153	123	123	55	50	99	96	50	89	51	51	84	49	62	68
FBgn0014026_RpL7A	FBgn0014026	Ribosomal protein L7A	RpL7A	18660	15355	19573	22280	8826	14652	22007	20233	15384	12463	12520	17341	29500	25031	23485	11367	10236	15862	16517	13206	16040	11270	11521	15138	16111	15836	13015
FBgn0014028_SdhB	FBgn0014028	Succinate dehydrogenase, subunit B (iron-sulfur)	SdhB	724	467	684	563	214	428	379	359	353	250	253	405	563	440	438	279	290	470	372	300	345	236	243	371	261	336	392
FBgn0014029_42615	FBgn0014029	Septin 2	42615	110	89	151	218	66	107	174	129	87	61	53	103	150	119	103	51	34	69	137	53	58	48	56	73	83	81	68
FBgn0014031_Spat	FBgn0014031	Serine pyruvate aminotransferase	Spat	33	14	10	17	2	9	10	8	4	4	3	1	7	3	2	7	2	9	6	3	2	5	4	5	12	1	1
FBgn0014032_Sptr	FBgn0014032	Sepiapterin reductase	Sptr	192	130	187	252	95	185	175	153	136	100	101	136	259	185	173	127	129	233	234	113	171	80	106	137	144	158	214
FBgn0014033_Sr-CI	FBgn0014033	Scavenger receptor class C, type I	Sr-CI	6	7	3	3	1	0	0	1	2	6	4	5	4	1	3	0	1	0	1	4	0	0	0	0	1	0	3
FBgn0014037_Su(Tpl)	FBgn0014037	Su(Tpl)	Su(Tpl)	454	419	466	590	211	391	400	444	404	312	303	419	727	488	505	239	188	418	399	199	392	238	245	320	398	330	431
FBgn0014073_Tie	FBgn0014073	Tie-like receptor tyrosine kinase	Tie	18	11	30	9	4	5	2	11	15	9	11	12	23	10	18	4	2	11	3	2	6	1	5	7	5	1	7
FBgn0014075_Ugt	FBgn0014075	UDP-glucose-glycoprotein glucosyltransferase	Ugt	99	104	131	60	26	72	48	50	58	40	33	59	77	79	79	22	18	80	30	23	55	23	15	24	9	12	57
FBgn0014076_Vm32E	FBgn0014076	Vitelline membrane 32E	Vm32E	0	0	1	0	0	0	2	0	0	0	0	0	0	0	0	0	0	0	0	1	0	0	0	2	1	0	2
FBgn0014092_CG4278	FBgn0014092	0	CG4278	100	75	102	85	35	53	83	46	27	40	39	67	61	54	49	27	26	61	50	39	49	27	52	45	52	34	30
FBgn0014127_barr	FBgn0014127	barren	barr	11	12	10	15	8	9	10	8	14	6	6	10	18	15	11	4	2	13	8	0	7	1	4	7	4	2	9
FBgn0014133_bif	FBgn0014133	bifocal	bif	297	385	515	486	225	408	286	315	326	221	216	248	377	338	320	185	171	317	337	168	202	143	212	176	135	138	184
FBgn0014135_bnl	FBgn0014135	branchless	bnl	88	70	70	64	45	57	72	91	76	77	59	101	141	104	129	23	35	71	37	27	43	19	28	23	33	37	63
FBgn0014141_cher	FBgn0014141	cheerio	cher	36	33	52	233	70	176	101	80	57	49	26	75	45	55	31	53	25	36	35	20	24	11	12	14	9	15	12
FBgn0014143_croc	FBgn0014143	crocodile	croc	6	6	9	3	2	4	12	3	11	0	2	2	1	6	3	2	6	2	3	0	9	0	1	3	1	1	2
FBgn0014163_fax	FBgn0014163	failed axon connections	fax	635	461	580	532	221	450	388	373	250	180	175	288	308	248	328	164	125	264	191	94	158	54	75	103	69	41	103
FBgn0014179_gcm	FBgn0014179	glial cells missing	gcm	0	0	0	0	0	0	0	0	0	0	0	0	0	0	0	0	0	0	0	0	0	0	0	0	0	0	0
FBgn0014184_Oda	FBgn0014184	Ornithine decarboxylase antizyme	Oda	7694	5786	8562	17774	6426	9332	13829	12581	8568	6831	7047	9881	14035	11075	10154	7327	6320	8349	13766	8075	8425	7433	8039	10286	9447	8632	7045
FBgn0014189_Hel25E	FBgn0014189	Helicase at 25E	Hel25E	283	243	325	203	84	171	170	186	174	136	87	175	236	197	203	96	92	140	206	80	112	77	82	150	117	86	97
FBgn0014269_prod	FBgn0014269	proliferation disrupter	prod	18	28	32	30	11	8	28	23	25	15	12	16	23	26	22	7	12	16	25	19	22	4	9	20	17	12	18
FBgn0014340_mof	FBgn0014340	males absent on the first	mof	23	9	15	29	10	19	19	15	15	11	15	19	29	23	14	10	8	23	13	16	20	7	5	15	13	13	8
FBgn0014342_mia	FBgn0014342	meiosis I arrest	mia	54	56	83	29	13	34	27	34	36	29	17	46	61	69	52	19	12	31	30	22	31	25	18	14	11	12	23
FBgn0014343_mirr	FBgn0014343	mirror	mirr	78	68	80	46	27	72	23	50	63	42	33	77	40	41	61	15	21	50	10	12	30	12	10	20	11	6	22
FBgn0014366_noi	FBgn0014366	noisette	noi	50	46	44	58	21	26	48	34	21	26	25	25	46	36	40	21	9	29	53	23	30	26	25	32	31	30	18
FBgn0014368_nol	FBgn0014368	no optic lobe	nol	0	0	0	0	0	0	0	0	0	0	0	0	0	0	0	0	0	0	0	0	0	0	0	1	0	0	1
FBgn0014380_RhoL	FBgn0014380	Rho-like	RhoL	471	447	620	745	276	577	577	637	481	389	384	594	830	562	527	286	245	468	677	300	440	230	317	411	364	305	427
FBgn0014388_sty	FBgn0014388	sprouty	sty	533	495	518	670	242	571	404	611	574	366	339	608	798	707	611	345	244	485	678	329	476	401	441	472	460	448	455
FBgn0014391_sun	FBgn0014391	stunted	sun	2010	2193	3068	2948	927	1781	2246	1356	1048	788	693	1071	1800	1534	1260	1526	1487	2054	1844	1372	1144	1274	1306	1185	2145	1716	1185
FBgn0014395_tilB	FBgn0014395	touch insensitive larva B	tilB	8	7	6	7	5	7	2	9	3	7	4	8	13	3	10	7	1	6	11	4	9	4	4	10	3	3	2
FBgn0014396_tim	FBgn0014396	timeless	tim	327	192	265	176	83	238	70	129	104	82	89	117	137	131	124	72	64	271	85	87	139	61	57	91	52	72	97
FBgn0014411_Vps26	FBgn0014411	Vacuolar protein sorting 26	Vps26	214	110	144	139	49	116	119	108	90	65	62	121	165	138	125	54	35	95	106	54	83	38	42	75	51	54	94
FBgn0014417_CG13397	FBgn0014417	0	CG13397	3	0	2	2	1	3	3	3	1	1	1	2	9	4	3	1	0	0	1	0	2	0	0	0	1	2	1
FBgn0014427_CG11899	FBgn0014427	0	CG11899	1387	881	1733	516	176	332	339	295	171	181	189	259	291	229	270	210	141	303	292	219	270	200	204	267	254	188	140
FBgn0014454_Acp1	FBgn0014454	Adult cuticle protein 1	Acp1	0	0	0	0	0	0	0	0	0	0	0	0	0	0	0	0	0	0	0	0	0	0	0	0	0	0	0
FBgn0014455_Ahcy13	FBgn0014455	Adenosylhomocysteinase at 13	Ahcy13	338	312	273	256	67	113	348	167	123	85	109	148	231	225	211	116	74	121	162	93	152	109	110	119	222	252	163
FBgn0014464_Cp7Fa	FBgn0014464	Chorion protein a at 7F	Cp7Fa	0	0	0	0	0	0	0	0	0	0	0	0	0	0	0	0	0	0	0	0	0	0	0	0	0	0	0
FBgn0014465_Cp7Fb	FBgn0014465	Chorion protein b at 7F	Cp7Fb	0	1	0	0	0	0	0	0	0	0	0	0	1	1	0	0	0	0	0	0	0	0	0	0	0	0	0
FBgn0014466_Cp7Fc	FBgn0014466	Chorion protein c at 7F	Cp7Fc	0	0	0	0	0	0	0	0	0	0	0	0	0	0	0	0	0	0	0	0	0	0	0	0	0	0	0
FBgn0014469_Cyp4e2	FBgn0014469	Cytochrome P450-4e2	Cyp4e2	156	136	192	114	61	138	146	156	185	158	167	229	350	290	366	48	43	130	169	67	148	73	129	156	67	85	312
FBgn0014848_Eig71Eh	FBgn0014848	Eig71Eh	Eig71Eh	0	0	0	0	0	0	0	0	0	0	0	0	0	0	0	0	0	0	0	0	0	0	0	0	0	0	0
FBgn0014849_Eig71Ei	FBgn0014849	Eig71Ei	Eig71Ei	0	0	0	0	0	0	0	0	0	0	0	0	0	0	0	0	0	0	0	0	0	0	0	0	0	0	0
FBgn0014850_Eig71Ej	FBgn0014850	Eig71Ej	Eig71Ej	0	0	0	0	0	0	0	0	0	0	0	0	0	0	0	0	0	0	0	0	0	0	0	0	0	0	0
FBgn0014851_Eig71Ek	FBgn0014851	Eig71Ek	Eig71Ek	0	0	0	0	0	0	0	0	0	0	0	0	0	0	0	0	0	0	0	0	0	0	0	0	0	0	0
FBgn0014857_His3.3A	FBgn0014857	Histone H3.3A	His3.3A	1743	1074	1371	1699	670	1187	1349	1142	836	790	662	1175	1841	1230	1314	874	794	1157	2371	794	999	779	772	1368	1079	1148	1272
FBgn0014859_Hr38	FBgn0014859	Hormone receptor-like in 38	Hr38	0	1	0	2	0	0	0	0	1	0	3	0	0	0	0	0	0	0	0	1	0	0	0	0	0	0	1
FBgn0014861_Mcm2	FBgn0014861	Minichromosome maintenance 2	Mcm2	54	30	35	20	8	15	7	12	8	9	2	10	7	7	4	6	5	10	12	3	9	2	3	5	10	9	8
FBgn0014863_Mlp84B	FBgn0014863	Muscle LIM protein at 84B	Mlp84B	729	481	590	536	179	273	206	213	222	81	121	211	97	103	146	188	147	257	82	101	181	186	161	190	92	106	134
FBgn0014865_Mtk	FBgn0014865	Metchnikowin	Mtk	1	4	4	86	27	25	121	71	11	46	46	28	60	19	21	23	8	2	18	14	6	4	13	1	4	0	6
FBgn0014868_Ost48	FBgn0014868	Oligosaccharyltransferase 48kD subunit	Ost48	572	366	507	527	185	289	482	253	186	155	147	284	433	352	409	244	256	328	486	250	298	294	258	432	670	449	344
FBgn0014869_Pglym78	FBgn0014869	Phosphoglyceromutase	Pglym78	2732	2378	2832	1198	463	708	566	638	461	348	317	402	661	568	500	646	591	876	470	415	507	435	370	556	517	708	568
FBgn0014870_Psi	FBgn0014870	P-element somatic inhibitor	Psi	196	184	169	113	64	147	68	108	100	88	79	95	93	119	106	68	49	110	54	56	119	46	56	75	28	37	50
FBgn0014877_Roe1	FBgn0014877	Roe1	Roe1	1363	951	818	337	149	302	258	290	184	183	174	232	337	258	195	189	142	336	227	179	278	237	164	321	289	249	289
FBgn0014879_Set	FBgn0014879	Set	Set	134	76	104	63	27	56	97	45	35	24	31	46	87	82	66	32	23	46	116	22	27	23	20	21	43	52	40
FBgn0014903_CG14630	FBgn0014903	0	CG14630	2	4	8	17	9	13	22	15	10	5	5	4	12	23	16	13	21	21	22	18	12	10	11	21	12	31	39
FBgn0014906_Hydr2	FBgn0014906	alpha/beta hydrolase2	Hydr2	95	96	77	132	58	127	108	121	103	90	70	97	136	155	103	52	40	69	91	32	76	48	62	61	46	46	54
FBgn0014930_CG2846	FBgn0014930	0	CG2846	666	509	663	387	120	211	366	195	147	131	129	178	265	164	195	132	158	249	215	104	138	121	141	170	328	205	142
FBgn0014931_CG2678	FBgn0014931	0	CG2678	8	10	5	16	1	4	5	9	2	3	2	5	3	3	3	0	3	4	6	1	6	3	9	5	7	7	7
FBgn0014949_btn	FBgn0014949	buttonless	btn	0	0	0	0	0	0	0	0	0	0	0	0	0	0	0	0	0	0	0	0	0	0	0	0	0	0	0
FBgn0015000_betaggt-I	FBgn0015000	beta subunit of type I geranylgeranyl transferase	betaggt-I	451	355	402	360	157	290	272	317	255	166	184	309	399	283	370	173	116	206	465	198	218	202	164	282	281	205	231
FBgn0015001_iotaTry	FBgn0015001	iotaTrypsin	iotaTry	1054	736	1085	2425	796	1159	2298	1495	965	849	941	1273	1835	1294	1414	1035	856	1402	2238	1163	1437	997	1136	1355	2322	1298	1114
FBgn0015008_Actn3	FBgn0015008	alpha actinin 3	Actn3	3	1	0	0	0	0	0	0	0	0	0	0	0	0	0	0	0	0	0	0	0	0	0	0	0	0	0
FBgn0015010_Ag5r	FBgn0015010	Antigen 5-related	Ag5r	548	598	1208	2850	1086	1802	4047	2969	1847	1607	1505	2144	3433	2822	2600	1186	1003	1638	2538	1964	1565	1567	1699	1730	2826	2198	1658
FBgn0015011_Ahcy89E	FBgn0015011	Adenosylhomocysteinase 89E	Ahcy89E	79	58	90	95	38	81	56	76	62	43	42	88	85	69	79	53	29	88	69	45	59	39	45	56	28	26	34
FBgn0015019_Cctgamma	FBgn0015019	Cctgamma	Cctgamma	1436	1078	990	795	274	410	535	548	369	345	303	407	672	562	587	282	198	324	528	297	406	374	283	341	452	547	360
FBgn0015024_CkIalpha	FBgn0015024	Casein kinase Ialpha	CkIalpha	676	739	684	906	344	573	804	691	526	439	381	525	1280	978	815	372	375	575	1206	328	442	262	303	311	409	462	521
FBgn0015025_CkIIalpha-i1	FBgn0015025	CKII-alpha subunit interactor-1	CkIIalpha-i1	6	11	4	10	3	4	2	5	4	2	5	9	15	16	9	2	2	2	2	2	7	1	6	7	3	5	3
FBgn0015031_cype	FBgn0015031	cyclope	cype	4229	3673	4729	4352	1909	3395	3021	2231	2119	1586	1589	2120	3482	3524	2826	2519	2770	4353	2237	2057	2535	1503	1555	2444	2745	2924	3321
FBgn0015032_Cyp4c3	FBgn0015032	Cytochrome P450-4c3	Cyp4c3	3	0	0	0	0	0	1	0	0	0	1	0	1	0	0	0	0	0	1	0	1	0	1	0	0	0	0
FBgn0015033_Cyp4d8	FBgn0015033	Cytochrome P450-4d8	Cyp4d8	77	69	90	308	143	173	197	176	132	73	66	121	151	122	118	204	198	263	631	179	200	120	201	275	370	207	255
FBgn0015034_Cyp4e1	FBgn0015034	Cytochrome P450-4e1	Cyp4e1	18	14	11	20	8	13	13	4	13	2	7	12	17	8	12	7	5	19	8	5	10	3	1	11	0	3	9
FBgn0015035_Cyp4e3	FBgn0015035	Cytochrome P450-4e3	Cyp4e3	3	0	3	1	0	0	1	3	1	0	0	0	0	1	0	0	1	2	0	0	0	0	0	1	1	0	0
FBgn0015036_Cyp4ae1	FBgn0015036	Cytochrome P450-4ae1	Cyp4ae1	412	263	327	517	180	414	402	372	329	211	223	325	547	341	376	234	240	427	643	196	293	141	185	253	283	273	284
FBgn0015037_Cyp4p1	FBgn0015037	Cytochrome P450-4p1	Cyp4p1	46	17	60	78	25	41	53	37	34	31	33	45	43	49	48	21	21	31	46	16	27	17	22	22	14	15	19
FBgn0015038_Cyp9b1	FBgn0015038	Cytochrome P450-9b1	Cyp9b1	153	128	165	120	67	106	120	104	84	78	72	110	220	155	130	52	62	147	97	34	92	28	38	52	29	27	61
FBgn0015039_Cyp9b2	FBgn0015039	Cytochrome P450-9b2	Cyp9b2	505	351	621	1722	721	978	1472	1153	739	559	516	1020	1184	816	825	734	700	959	1419	622	726	525	701	1126	1382	1260	1461
FBgn0015040_Cyp9c1	FBgn0015040	Cytochrome P450-9c1	Cyp9c1	157	99	93	160	64	106	101	96	70	74	62	99	140	104	86	76	84	95	111	36	68	42	40	57	63	61	66
FBgn0015075_Ddx1	FBgn0015075	Dead-box-1	Ddx1	68	61	95	67	19	47	65	29	33	26	17	23	46	41	34	24	22	38	35	32	24	29	21	30	41	48	37
FBgn0015218_eIF-4E	FBgn0015218	Eukaryotic initiation factor 4E	eIF-4E	300	282	331	221	85	205	177	144	142	117	96	188	258	254	199	64	79	184	123	63	136	55	52	106	68	58	122
FBgn0015221_Fer2LCH	FBgn0015221	Ferritin 2 light chain homologue	Fer2LCH	2315	2051	2491	7553	3373	6191	5463	6095	5430	3824	3625	5902	5869	4823	4111	3216	2665	4811	4862	2696	4461	2047	2312	3866	2367	3257	4840
FBgn0015222_Fer1HCH	FBgn0015222	Ferritin 1 heavy chain homologue	Fer1HCH	3990	2898	3802	11784	4759	7284	9520	7587	5685	4452	4171	6617	7839	6335	5570	5028	4306	5660	8022	4455	5312	4430	4096	6483	7799	7862	6472
FBgn0015229_glec	FBgn0015229	gliolectin	glec	47	52	70	43	15	39	38	42	48	28	37	69	68	46	64	17	8	43	16	8	36	5	11	11	11	6	19
FBgn0015230_Glut3	FBgn0015230	Glucose transporter type 3	Glut3	0	0	0	0	0	0	0	0	0	0	0	0	0	0	0	0	0	0	0	0	0	0	0	0	0	0	0
FBgn0015239_Hr78	FBgn0015239	Hormone-receptor-like in 78	Hr78	10	27	54	37	12	20	31	23	36	18	21	13	59	40	38	15	11	39	57	16	19	14	28	17	19	10	12
FBgn0015240_Hr96	FBgn0015240	Hormone receptor-like in 96	Hr96	140	140	189	389	153	279	309	261	205	156	125	166	303	237	207	140	121	227	394	152	224	180	156	407	398	357	427
FBgn0015245_Hsp60	FBgn0015245	Heat shock protein 60	Hsp60	1285	962	937	438	139	269	549	301	276	176	166	280	445	315	353	168	152	303	444	215	304	289	255	329	588	369	229
FBgn0015247_Diap2	FBgn0015247	Death-associated inhibitor of apoptosis 2	Diap2	110	106	162	201	71	117	133	114	80	74	63	110	144	109	117	64	79	109	110	88	89	65	68	87	101	110	62
FBgn0015268_Nap1	FBgn0015268	Nucleosome assembly protein 1	Nap1	1719	1438	1450	1386	571	1165	2200	2022	1779	1260	1173	1855	3161	2356	2364	559	397	1034	2056	899	1346	743	851	874	1198	942	864
FBgn0015269_Nf1	FBgn0015269	Neurofibromin 1	Nf1	9	12	24	17	6	21	15	13	19	9	6	10	21	18	18	3	4	18	5	1	9	2	4	2	3	1	6
FBgn0015270_Orc2	FBgn0015270	Origin recognition complex subunit 2	Orc2	24	17	17	5	3	2	3	3	4	2	2	3	5	2	6	3	2	6	4	1	4	1	3	3	8	2	3
FBgn0015271_Orc5	FBgn0015271	Origin recognition complex subunit 5	Orc5	27	23	31	15	3	7	3	8	5	6	3	10	8	5	10	4	2	9	5	3	6	6	4	7	6	1	7
FBgn0015277_Pi3K59F	FBgn0015277	Phosphotidylinositol 3 kinase 59F	Pi3K59F	37	24	37	69	24	56	60	47	55	31	33	64	78	64	64	17	25	30	106	22	19	26	28	43	49	45	31
FBgn0015278_Pi3K68D	FBgn0015278	Phosphotidylinositol 3 kinase 68D	Pi3K68D	254	254	250	205	103	159	130	145	152	100	105	121	225	178	147	76	68	192	92	81	131	54	49	82	83	70	111
FBgn0015279_Pi3K92E	FBgn0015279	Pi3K92E	Pi3K92E	46	54	68	42	19	36	28	42	25	34	30	46	38	49	41	13	9	41	18	14	20	7	24	21	11	11	18
FBgn0015282_Rpt2	FBgn0015282	Regulatory particle triple-A ATPase 2	Rpt2	1070	857	1004	1196	533	645	942	858	521	519	437	609	995	827	777	523	512	622	1049	545	612	497	492	881	867	916	765
FBgn0015283_Rpn10	FBgn0015283	Regulatory particle non-ATPase 10	Rpn10	328	263	372	377	131	231	344	275	196	170	143	247	401	302	330	132	118	202	303	117	177	120	125	220	190	176	231
FBgn0015286_Rala	FBgn0015286	Ras-like protein A	Rala	312	276	362	525	198	311	290	355	310	266	220	270	332	309	263	169	159	301	166	105	216	119	160	161	125	123	168
FBgn0015288_RpL22	FBgn0015288	Ribosomal protein L22	RpL22	447	752	814	469	242	536	437	525	675	579	447	504	1164	1275	892	211	207	704	199	236	509	124	174	138	105	194	423
FBgn0015295_Shark	FBgn0015295	SH2 ankyrin repeat kinase	Shark	24	27	43	39	10	37	20	36	28	31	22	31	32	18	30	19	17	29	22	23	25	22	24	19	15	11	9
FBgn0015296_Shc	FBgn0015296	SHC-adaptor protein	Shc	37	16	34	51	14	27	32	42	26	31	22	24	49	47	26	15	14	12	29	14	11	14	11	14	18	23	18
FBgn0015298_Srp19	FBgn0015298	Signal recognition particle protein 19	Srp19	520	488	523	658	235	351	690	320	237	241	223	273	602	474	528	247	266	377	652	278	345	302	227	366	552	380	340
FBgn0015299_Ssb-c31a	FBgn0015299	Single stranded-binding protein c31A	Ssb-c31a	237	111	180	196	72	101	226	111	75	87	61	99	175	145	109	83	86	113	243	79	121	104	85	125	307	170	119
FBgn0015300_Ssl	FBgn0015300	Suppressor of Stellate-like	Ssl	0	0	0	0	0	0	0	0	0	0	0	0	0	0	0	0	0	0	0	0	0	0	0	0	0	0	0
FBgn0015316_Try29F	FBgn0015316	Trypsin 29F	Try29F	1057	577	430	585	114	470	596	807	874	314	560	334	530	473	448	184	178	793	406	200	860	275	320	522	419	324	98
FBgn0015320_Ubc2	FBgn0015320	Ubiquitin conjugating enzyme 2	Ubc2	257	243	245	325	145	188	152	251	189	146	127	151	191	138	130	137	120	192	158	118	174	118	114	136	111	135	113
FBgn0015321_Ubc4	FBgn0015321	Ubiquitin conjugating enzyme 4	Ubc4	122	177	190	180	69	130	109	113	103	87	68	86	205	159	150	84	63	125	153	68	102	52	70	56	102	97	109
FBgn0015324_Vha26	FBgn0015324	Vacuolar H+-ATPase 26kD subunit�	Vha26	2979	2502	3086	2311	906	2185	1216	1675	1609	1196	1139	1651	1951	1571	1572	1294	1148	2729	1291	878	1761	763	901	1159	716	597	1315
FBgn0015331_abs	FBgn0015331	abstrakt	abs	33	34	42	46	26	27	13	35	14	19	19	26	22	23	23	14	9	26	10	15	19	5	12	16	10	25	18
FBgn0015336_CG15865	FBgn0015336	0	CG15865	296	241	221	213	104	176	221	261	174	155	153	208	374	258	256	88	84	151	376	82	156	98	112	185	125	110	122
FBgn0015338_CG5861	FBgn0015338	0	CG5861	441	262	369	373	118	189	501	245	154	135	126	228	330	208	280	135	161	202	321	148	173	183	191	237	473	272	177
FBgn0015351_CG14906	FBgn0015351	0	CG14906	30	16	32	19	6	27	16	16	15	19	13	29	23	27	27	7	3	23	17	9	8	11	6	6	4	14	14
FBgn0015359_CG2034	FBgn0015359	0	CG2034	49	28	38	27	12	24	33	25	22	18	13	17	36	24	31	14	10	22	17	16	26	11	10	25	20	11	17
FBgn0015360_oxt	FBgn0015360	peptide O-xylosyltransferase	oxt	67	53	48	59	22	30	41	41	34	21	38	43	40	36	43	28	20	42	42	31	33	25	20	50	31	43	37
FBgn0015371_chn	FBgn0015371	charlatan	chn	43	26	45	54	15	22	30	33	14	13	16	30	19	20	25	12	13	12	28	15	12	16	9	12	13	8	5
FBgn0015372_RabX1	FBgn0015372	RabX1	RabX1	64	32	61	74	23	31	87	68	24	53	34	58	136	87	102	29	18	32	90	35	27	25	29	47	51	37	39
FBgn0015376_cutlet	FBgn0015376	cutlet	cutlet	11	7	6	2	3	3	0	2	0	1	1	2	0	0	1	2	1	3	1	0	0	0	2	2	0	0	1
FBgn0015379_dod	FBgn0015379	dodo	dod	101	74	98	95	43	57	71	53	44	41	42	56	91	71	69	45	40	41	60	42	54	39	34	46	65	65	51
FBgn0015380_drl	FBgn0015380	derailed	drl	61	48	39	46	18	74	27	68	82	53	48	92	156	112	118	17	14	76	45	9	67	10	21	32	4	10	39
FBgn0015381_dsf	FBgn0015381	dissatisfaction	dsf	0	0	0	0	0	0	0	0	0	0	0	0	0	0	0	0	0	0	0	0	0	0	0	0	0	0	0
FBgn0015391_glu	FBgn0015391	gluon	glu	33	25	18	22	12	23	11	13	24	12	13	18	16	28	20	14	11	24	8	8	14	6	8	9	6	10	16
FBgn0015393_hoip	FBgn0015393	hoi-polloi	hoip	1042	652	590	407	130	225	511	406	285	211	195	283	434	340	301	144	75	212	298	173	211	194	170	208	318	315	193
FBgn0015396_jumu	FBgn0015396	jumeau	jumu	2	3	6	5	3	6	2	2	4	2	3	6	3	1	7	3	4	1	2	2	2	0	1	1	1	0	1
FBgn0015399_kek1	FBgn0015399	kekkon-1	kek1	2	0	1	0	1	4	0	1	2	1	2	2	2	1	5	1	0	2	0	3	0	1	1	0	0	0	1
FBgn0015400_kek2	FBgn0015400	kekkon-2	kek2	0	0	4	2	1	1	0	3	0	0	0	0	1	3	0	0	1	1	0	0	4	0	0	1	0	0	0
FBgn0015402_ksr	FBgn0015402	kinase suppressor of ras	ksr	21	13	26	24	11	15	12	12	12	14	5	16	23	20	19	13	16	17	14	8	14	15	7	10	11	13	14
FBgn0015477_Rme-8	FBgn0015477	Receptor mediated endocytosis 8	Rme-8	31	50	77	46	24	57	38	44	37	28	32	38	62	52	34	12	8	43	35	17	32	14	11	22	12	6	29
FBgn0015509_Cul1	FBgn0015509	Cullin 1	Cul1	297	237	285	207	86	148	118	160	128	98	84	149	189	170	136	109	72	156	148	101	117	87	109	160	102	109	106
FBgn0015513_mbc	FBgn0015513	myoblast city	mbc	166	214	200	119	55	108	76	74	91	72	78	67	159	142	110	52	36	100	49	26	54	12	19	27	22	30	36
FBgn0015519_nAChRalpha3	FBgn0015519	nicotinic Acetylcholine Receptor alpha3	nAChRalpha3	1	4	0	2	1	1	0	3	1	3	2	1	1	0	4	0	2	0	0	0	2	2	1	0	2	0	0
FBgn0015520_nonA-l	FBgn0015520	nonA-like	nonA-l	9	5	5	11	6	8	8	9	11	2	6	11	10	9	8	9	2	8	6	3	8	1	4	8	8	6	4
FBgn0015521_RpS21	FBgn0015521	Ribosomal protein S21	RpS21	12164	8173	12420	17983	5799	8292	20142	13177	8785	8110	9233	11661	16288	13970	13975	8094	7180	8971	9764	10222	9645	10092	10366	12087	17850	12942	8485
FBgn0015522_olf186-M	FBgn0015522	olf186-M	olf186-M	103	61	109	98	34	47	62	56	41	36	46	35	71	60	68	30	30	40	34	30	56	46	30	49	33	32	40
FBgn0015524_otp	FBgn0015524	orthopedia	otp	2	0	0	0	0	0	1	0	0	1	0	0	0	1	1	1	1	1	0	0	0	1	0	0	1	1	1
FBgn0015527_peng	FBgn0015527	penguin	peng	194	143	134	161	48	79	99	121	108	78	69	93	128	120	111	62	32	67	101	66	64	61	68	66	49	84	52
FBgn0015541_sda	FBgn0015541	slamdance	sda	1672	1130	1427	571	214	437	283	522	272	226	218	301	252	264	149	97	43	57	80	31	50	40	38	43	28	27	30
FBgn0015543_snoRNA:Me28S-A1322	FBgn0015543	0	snoRNA:Me28S-A1322	18	17	15	72	13	6	10	22	10	7	13	3	3	8	8	23	11	12	0	26	16	22	17	9	5	9	3
FBgn0015544_spag	FBgn0015544	spaghetti	spag	16	13	16	17	4	13	19	16	20	10	14	17	18	23	36	8	5	13	10	7	12	3	3	5	1	5	6
FBgn0015546_spel1	FBgn0015546	spellchecker1	spel1	5	10	10	8	1	5	7	5	6	6	7	1	7	10	7	5	0	3	8	6	1	2	2	5	5	2	4
FBgn0015550_tap	FBgn0015550	target of Poxn	tap	13	7	15	14	4	6	17	17	16	8	7	11	18	11	2	8	6	12	14	12	11	8	9	11	8	11	11
FBgn0015553_tos	FBgn0015553	tosca	tos	5	2	3	2	0	0	1	0	0	1	0	2	1	0	1	0	0	1	0	0	0	0	1	1	1	0	0
FBgn0015558_tty	FBgn0015558	tweety	tty	1	0	0	1	0	2	1	2	1	0	3	1	2	1	1	2	1	1	0	0	2	0	2	0	2	0	0
FBgn0015561_unpg	FBgn0015561	unplugged	unpg	0	0	0	0	0	0	0	0	0	0	1	0	0	0	0	0	0	0	0	0	1	0	0	0	0	0	0
FBgn0015568_alpha-Est1	FBgn0015568	alpha-Esterase-1	alpha-Est1	435	449	489	1103	398	543	1116	483	372	294	310	369	655	512	513	464	520	489	809	395	406	256	316	390	580	461	397
FBgn0015569_alpha-Est10	FBgn0015569	alpha-Esterase-10	alpha-Est10	105	129	149	72	19	55	39	36	62	24	23	51	42	39	48	63	44	108	46	47	102	34	28	66	53	48	125
FBgn0015570_alpha-Est2	FBgn0015570	alpha-Esterase-2	alpha-Est2	2	3	4	0	4	10	2	1	2	2	9	3	12	8	7	1	1	5	2	2	6	1	2	2	1	1	7
FBgn0015571_alpha-Est3	FBgn0015571	alpha-Esterase-3	alpha-Est3	284	232	346	713	245	311	720	383	252	234	196	292	396	368	283	285	255	298	371	269	261	175	173	264	344	357	239
FBgn0015572_alpha-Est4	FBgn0015572	alpha-Esterase-4	alpha-Est4	21	4	20	75	25	35	28	18	16	15	18	29	31	23	19	40	37	47	32	25	34	21	23	32	25	21	40
FBgn0015574_alpha-Est6	FBgn0015574	alpha-Esterase-6	alpha-Est6	2	0	0	0	0	0	0	0	0	0	0	1	0	0	0	0	0	0	0	0	0	0	0	0	0	0	0
FBgn0015575_alpha-Est7	FBgn0015575	alpha-Esterase-7	alpha-Est7	252	247	262	505	198	360	454	394	379	199	215	362	590	453	452	284	321	502	532	343	424	275	317	426	413	368	384
FBgn0015576_alpha-Est8	FBgn0015576	alpha-Esterase-8	alpha-Est8	546	469	707	256	100	254	111	192	186	126	145	203	215	171	175	118	88	192	116	47	144	54	55	96	39	42	101
FBgn0015577_alpha-Est9	FBgn0015577	alpha-Esterase-9	alpha-Est9	67	73	128	129	45	86	66	72	90	57	46	67	103	69	61	39	49	75	87	54	75	42	60	85	63	48	61
FBgn0015582_dare	FBgn0015582	defective in the avoidance of repellents	dare	45	22	36	53	32	39	49	41	29	33	27	39	65	41	43	26	21	25	140	26	22	31	22	47	67	46	33
FBgn0015583_Acp29AB	FBgn0015583	Accessory gland protein 29AB	Acp29AB	0	0	0	0	0	1	0	0	0	0	0	0	0	0	0	0	0	0	0	0	0	0	0	0	0	0	0
FBgn0015584_Acp53Ea	FBgn0015584	Accessory gland protein 53Ea	Acp53Ea	0	0	0	0	0	0	0	0	0	0	0	0	0	0	0	0	0	0	0	0	0	0	0	0	0	0	0
FBgn0015585_Acp63F	FBgn0015585	Accessory gland protein 63F	Acp63F	0	0	0	0	0	0	0	0	0	0	0	0	0	0	0	0	0	0	0	0	0	0	0	0	0	0	0
FBgn0015586_Acp76A	FBgn0015586	Accessory gland protein 76A	Acp76A	0	0	0	0	0	0	0	0	0	0	0	0	1	0	0	0	0	0	0	0	0	0	0	0	0	0	0
FBgn0015589_Apc	FBgn0015589	APC-like	Apc	44	52	53	44	11	53	38	62	54	46	35	58	68	38	39	12	12	47	19	10	25	8	9	13	7	4	12
FBgn0015591_AstA	FBgn0015591	Allatostatin A	AstA	132	91	147	106	51	90	123	118	97	82	79	110	204	139	158	54	59	90	214	60	126	68	79	140	161	206	223
FBgn0015600_toc	FBgn0015600	toucan	toc	31	53	30	37	15	33	28	33	40	18	27	31	47	40	42	16	12	29	17	17	34	16	21	9	10	9	18
FBgn0015602_BEAF-32	FBgn0015602	Boundary element-associated factor of 32kD	BEAF-32	91	84	96	77	34	51	87	66	60	34	48	69	105	63	95	36	33	49	109	45	39	35	31	49	51	43	52
FBgn0015609_CadN	FBgn0015609	Cadherin-N	CadN	6	6	7	10	3	5	3	8	12	4	1	6	3	5	7	0	3	5	1	3	2	1	3	3	1	2	4
FBgn0015614_CanB2	FBgn0015614	Calcineurin B2	CanB2	137	153	174	192	81	132	140	143	143	85	82	156	189	169	152	113	81	127	141	92	110	82	87	89	90	107	90
FBgn0015615_SMC3	FBgn0015615	Structural maintenance of chromosomes 3	SMC3	33	23	32	19	10	27	7	26	25	15	10	22	25	27	22	9	7	21	20	15	25	6	11	6	9	5	12
FBgn0015618_Cdk8	FBgn0015618	Cyclin-dependent kinase 8	Cdk8	16	14	12	24	5	11	9	12	15	7	3	7	12	18	7	4	9	6	6	5	8	6	7	15	4	8	4
FBgn0015621_Clp	FBgn0015621	Clipper	Clp	35	21	23	23	10	23	34	13	16	10	5	18	27	16	18	8	8	14	21	9	13	14	8	13	29	16	9
FBgn0015622_Cnx99A	FBgn0015622	Calnexin 99A	Cnx99A	855	649	687	552	286	457	365	391	373	299	235	420	668	556	641	313	321	498	540	299	531	286	267	421	317	421	659
FBgn0015623_Cpr	FBgn0015623	Cytochrome P450 reductase	Cpr	1506	1130	1530	1091	490	908	924	777	708	508	486	950	1237	990	907	636	611	1066	1168	532	845	518	609	1020	1153	1061	1334
FBgn0015625_CycB3	FBgn0015625	Cyclin B3	CycB3	1	4	0	1	1	1	0	1	1	1	0	3	1	0	1	0	0	0	2	0	0	0	0	1	5	0	0
FBgn0015663_Dot	FBgn0015663	Dorothy	Dot	114	85	130	66	28	60	40	36	40	49	33	48	89	78	76	23	30	58	31	15	36	15	21	29	23	15	52
FBgn0015664_Dref	FBgn0015664	DNA replication-related element factor	Dref	53	34	54	32	8	26	28	33	34	27	22	40	55	42	33	13	6	34	35	9	23	10	15	19	9	11	16
FBgn0015714_Cyp6a17	FBgn0015714	Cytochrome P450-6a17	Cyp6a17	13	15	33	17	4	0	18	14	20	12	7	21	99	14	47	10	11	32	3	6	11	4	7	4	7	6	12
FBgn0015721_ktub	FBgn0015721	king tubby	ktub	3	2	5	6	3	4	3	8	7	1	3	1	13	6	5	2	0	1	7	0	0	4	2	2	3	2	3
FBgn0015737_Hmu	FBgn0015737	Hemomucin	Hmu	163	233	272	238	112	246	128	169	182	148	105	163	206	151	176	132	107	239	122	102	186	92	99	159	75	83	123
FBgn0015754_Lis-1	FBgn0015754	Lissencephaly-1	Lis-1	98	107	136	183	55	105	109	119	92	61	81	82	158	137	85	83	65	101	128	59	72	70	84	82	95	107	107
FBgn0015756_RpL9	FBgn0015756	Ribosomal protein L9	RpL9	6479	4954	6701	8213	2803	4918	11744	6213	4950	4050	4175	5940	9313	7528	7575	3289	3337	5077	5593	3662	4617	3309	3871	4900	6540	4681	3958
FBgn0015765_p38a	FBgn0015765	p38a MAP kinase	p38a	97	80	100	152	37	113	75	112	84	63	73	131	99	64	98	46	39	81	39	16	65	31	43	55	19	34	48
FBgn0015766_Msr-110	FBgn0015766	Msr-110	Msr-110	175	119	161	244	72	193	182	122	194	80	101	208	187	147	193	73	70	207	95	66	168	69	76	65	78	59	93
FBgn0015770_MstProx	FBgn0015770	MstProx	MstProx	0	0	0	0	0	0	0	0	0	0	0	0	0	1	0	0	0	0	0	0	0	0	0	0	0	0	0
FBgn0015772_Nak	FBgn0015772	Numb-associated kinase	Nak	67	48	93	73	49	61	47	74	75	46	39	54	85	71	56	43	34	54	44	24	53	21	23	43	32	24	50
FBgn0015773_NetA	FBgn0015773	Netrin-A	NetA	51	60	84	113	44	70	81	57	60	29	29	67	48	71	82	32	34	60	47	26	46	15	11	44	29	40	31
FBgn0015774_NetB	FBgn0015774	Netrin-B	NetB	62	73	70	57	24	45	36	24	48	15	19	45	26	37	33	24	20	37	23	15	33	15	10	13	16	15	21
FBgn0015776_nrv1	FBgn0015776	nervana 1	nrv1	624	650	878	611	249	512	234	350	332	218	223	303	364	327	347	327	323	601	231	204	375	155	177	268	159	165	264
FBgn0015777_nrv2	FBgn0015777	nervana 2	nrv2	12	27	30	20	10	10	19	13	15	10	7	15	13	18	19	12	12	15	15	8	20	9	3	6	16	15	10
FBgn0015778_rin	FBgn0015778	rasputin	rin	2147	1760	1660	1503	554	1173	748	1269	1126	870	720	1166	1538	1400	1376	612	441	1020	949	436	961	503	492	736	476	521	798
FBgn0015781_P5cr	FBgn0015781	Pyrroline 5-carboyxlate reductase	P5cr	150	91	148	153	67	96	136	88	72	52	57	78	145	105	122	59	60	106	147	83	98	92	69	106	184	143	97
FBgn0015789_Rab10	FBgn0015789	Rab10	Rab10	329	202	304	485	159	284	264	369	252	187	195	294	321	220	249	158	129	207	407	199	200	158	194	267	169	206	142
FBgn0015790_Rab11	FBgn0015790	Rab11	Rab11	450	570	703	623	252	469	433	523	387	353	315	395	698	693	514	328	276	456	581	357	385	317	338	282	378	401	440
FBgn0015791_Rab14	FBgn0015791	Rab14	Rab14	122	120	143	277	139	176	277	245	164	151	160	238	370	256	220	88	90	154	274	93	129	69	89	113	96	106	124
FBgn0015793_Rab19	FBgn0015793	Rab19	Rab19	32	22	19	54	16	37	37	35	25	21	20	23	25	21	34	19	22	24	34	26	27	19	22	20	19	21	16
FBgn0015794_Rab18	FBgn0015794	Rab18	Rab18	292	204	329	853	323	465	987	609	348	292	396	476	592	472	468	284	258	287	550	290	312	262	340	443	723	478	257
FBgn0015795_Rab7	FBgn0015795	Rab7	Rab7	292	265	446	554	183	505	464	493	538	395	314	496	637	506	504	217	176	393	459	157	330	135	188	259	164	184	325
FBgn0015797_Rab6	FBgn0015797	Rab6	Rab6	316	274	344	357	123	262	258	251	178	164	156	241	340	269	261	144	101	184	307	118	183	123	119	175	172	179	147
FBgn0015799_Rbf	FBgn0015799	Retinoblastoma-family protein	Rbf	86	73	61	39	21	31	42	35	37	28	27	32	101	83	56	10	17	42	53	26	32	19	17	27	27	26	30
FBgn0015801_Reg-5	FBgn0015801	Rhythmically expressed gene 5	Reg-5	61	30	65	36	17	51	15	26	46	22	28	44	44	30	37	14	6	37	20	13	33	10	12	29	12	4	29
FBgn0015803_RtGEF	FBgn0015803	Rho-type guanine nucleotide exchange factor	RtGEF	68	80	62	71	29	43	30	66	52	34	41	66	60	60	46	26	32	36	62	18	41	21	22	38	23	44	35
FBgn0015805_HDAC1	FBgn0015805	Histone deacetylase 1	HDAC1	97	131	144	108	42	96	90	98	97	53	33	95	155	96	118	69	30	106	107	40	71	39	33	30	49	53	76
FBgn0015808_ScpX	FBgn0015808	Sterol carrier protein X-related thiolase	ScpX	1002	686	738	941	327	429	577	420	333	274	244	362	405	357	343	538	433	473	676	522	516	459	422	803	792	496	505
FBgn0015818_Spx	FBgn0015818	Spliceosomal protein on the X	Spx	47	45	43	27	12	19	21	24	15	27	10	27	47	36	33	12	7	30	27	16	21	13	14	17	15	27	11
FBgn0015828_TfIIEalpha	FBgn0015828	Transcription factor IIEalpha	TfIIEalpha	97	61	56	62	21	28	56	41	24	19	31	39	78	48	57	32	19	25	66	28	29	18	30	33	80	43	36
FBgn0015829_TfIIEbeta	FBgn0015829	Transcription factor IIEbeta	TfIIEbeta	56	45	47	69	36	40	49	49	29	27	31	33	47	46	49	27	34	37	49	23	42	22	29	34	27	31	36
FBgn0015831_Rtnl2	FBgn0015831	Rtnl2	Rtnl2	0	0	1	0	1	0	0	1	0	0	1	0	1	0	1	0	0	1	0	0	0	0	0	0	0	0	0
FBgn0015834_Trip1	FBgn0015834	Trip1	Trip1	1020	651	880	1361	503	740	1454	1010	758	564	572	838	1121	987	1057	502	502	683	755	505	650	527	548	709	903	761	509
FBgn0015838_Vang	FBgn0015838	Van Gogh	Vang	38	32	33	43	20	25	26	37	27	21	17	28	37	24	28	18	14	31	16	16	23	15	14	19	14	28	14
FBgn0015872_Drip	FBgn0015872	Drip	Drip	71	62	153	196	71	115	151	125	126	81	107	126	160	141	140	90	71	124	107	90	124	64	96	82	63	84	103
FBgn0015903_apt	FBgn0015903	apontic	apt	36	31	43	29	17	29	25	29	38	28	23	33	25	39	21	4	9	38	7	9	24	7	5	6	4	5	9
FBgn0015904_ara	FBgn0015904	araucan	ara	117	78	139	142	33	75	39	104	94	62	58	77	67	50	55	55	42	81	32	54	69	51	51	56	34	14	42
FBgn0015905_ast	FBgn0015905	asteroid	ast	36	31	35	37	11	27	20	36	39	29	20	23	41	26	29	8	15	32	20	22	25	7	11	9	2	4	15
FBgn0015919_caup	FBgn0015919	caupolican	caup	133	146	171	109	64	126	65	112	114	80	64	121	129	114	101	49	31	112	71	56	103	42	46	74	42	39	73
FBgn0015924_crq	FBgn0015924	croquemort	crq	478	328	412	655	238	328	264	423	298	240	233	304	324	222	274	263	219	362	144	178	297	166	177	236	113	126	190
FBgn0015925_csul	FBgn0015925	capsuleen	csul	57	40	41	29	18	38	32	35	36	25	19	39	47	55	32	6	6	18	31	9	26	10	11	20	10	6	22
FBgn0015926_dah	FBgn0015926	discontinuous actin hexagon	dah	0	0	0	0	1	2	0	0	1	0	0	0	1	0	1	0	0	1	0	2	0	1	2	0	3	0	0
FBgn0015929_dpa	FBgn0015929	disc proliferation abnormal	dpa	80	59	57	18	8	20	18	22	12	8	10	21	22	11	17	13	7	20	25	9	12	2	8	7	12	6	8
FBgn0015946_grim	FBgn0015946	grim	grim	0	0	0	0	0	0	0	0	0	0	0	0	0	0	0	0	0	0	0	0	0	0	1	0	0	0	0
FBgn0015949_hrg	FBgn0015949	hiiragi	hrg	292	210	219	250	130	221	113	252	239	190	173	249	299	256	242	102	100	212	147	102	204	68	95	128	94	54	140
FBgn0016013_Faa	FBgn0016013	Fumarylacetoacetase	Faa	7	3	3	6	0	5	1	0	0	0	3	5	3	3	0	0	2	3	3	1	0	0	1	2	1	3	1
FBgn0016031_lama	FBgn0016031	lamina ancestor	lama	161	170	205	147	52	113	86	146	93	82	83	154	158	110	121	64	28	89	121	64	110	54	61	67	58	35	81
FBgn0016032_lbm	FBgn0016032	late bloomer	lbm	41	30	49	102	37	47	106	90	60	31	37	78	122	73	85	35	19	41	72	24	31	29	37	50	46	50	23
FBgn0016034_mael	FBgn0016034	maelstrom	mael	1	1	2	0	1	2	1	3	0	0	1	0	3	1	0	0	1	0	1	0	0	0	0	0	0	0	0
FBgn0016036_mei-P22	FBgn0016036	meiotic P22	mei-P22	0	0	0	0	0	0	0	0	0	0	0	0	0	0	0	0	0	0	0	0	0	0	0	0	0	0	0
FBgn0016038_Vsp37A	FBgn0016038	Vacuolar protein sorting 37A	Vsp37A	67	83	107	112	49	76	75	109	74	55	45	72	84	86	74	44	63	89	75	77	75	54	60	71	55	74	46
FBgn0016041_Tom40	FBgn0016041	Translocase of outer membrane 40	Tom40	506	520	575	214	76	174	204	204	154	145	110	173	343	248	259	111	90	179	322	109	168	107	132	122	193	159	122
FBgn0016047_nompA	FBgn0016047	no mechanoreceptor potential A	nompA	0	0	0	0	0	0	0	0	0	0	0	0	0	0	0	0	0	0	0	1	0	0	0	0	0	0	0
FBgn0016053_pgc	FBgn0016053	polar granule component	pgc	2	2	0	0	0	0	0	1	1	0	0	0	1	0	1	1	1	1	0	0	0	0	0	1	13	1	0
FBgn0016054_phr6-4	FBgn0016054	(6-4)-photolyase	phr6-4	5	1	1	4	0	1	6	4	1	2	1	4	2	2	1	1	1	1	4	0	2	0	1	1	4	0	0
FBgn0016059_Sema-1b	FBgn0016059	Sema-1b	Sema-1b	79	96	150	69	35	79	45	53	64	40	44	82	79	60	63	33	23	54	18	16	44	12	14	21	18	12	36
FBgn0016061_side	FBgn0016061	sidestep	side	9	7	14	10	3	5	4	8	7	1	5	5	2	1	4	5	3	10	4	2	3	4	3	1	1	0	7
FBgn0016070_smg	FBgn0016070	smaug	smg	25	17	20	23	16	16	12	24	37	18	17	18	28	26	20	8	9	22	11	8	10	8	9	13	9	10	11
FBgn0016075_vkg	FBgn0016075	viking	vkg	39	33	31	15	0	12	9	14	5	10	11	4	7	3	4	5	8	9	8	3	2	0	6	1	3	0	0
FBgn0016076_vri	FBgn0016076	vrille	vri	159	146	208	124	51	136	73	97	116	102	80	125	130	129	108	49	39	104	91	46	92	58	71	74	55	55	59
FBgn0016078_wun	FBgn0016078	wunen	wun	108	98	201	195	84	194	173	170	191	129	150	251	318	218	262	90	66	195	186	90	187	65	91	100	87	57	125
FBgn0016080_xmas-1	FBgn0016080	xmas-1	xmas-1	1	3	1	1	0	2	0	1	0	2	1	0	0	0	0	0	0	0	0	0	0	0	0	0	0	1	0
FBgn0016081_fry	FBgn0016081	furry	fry	59	43	96	103	61	102	82	91	73	61	78	92	117	96	96	30	21	78	58	26	57	19	19	37	14	33	61
FBgn0016119_ATPsynCF6	FBgn0016119	ATP synthase, coupling factor 6	ATPsynCF6	2448	1862	2352	1530	628	1573	1484	1038	1129	868	749	1108	2084	1845	1546	689	852	2008	1009	776	1121	428	497	739	873	1029	1387
FBgn0016120_ATPsynD	FBgn0016120	ATP synthase, subunit D	ATPsynD	6097	5218	6723	4693	2166	4331	3360	2864	2563	1940	1821	2696	4129	3718	3110	2649	2872	5383	2110	2466	3258	1639	1680	2814	2265	2430	3316
FBgn0016122_Acer	FBgn0016122	Angiotensin-converting enzyme-related	Acer	69	64	61	46	17	36	30	22	37	10	18	44	37	32	40	24	19	45	14	8	29	13	13	16	15	7	24
FBgn0016123_Alp4	FBgn0016123	Alkaline phosphatase 4	Alp4	570	308	188	446	150	182	231	30	106	69	25	51	34	52	63	134	84	247	148	18	86	58	17	43	99	30	44
FBgn0016126_CaMKI	FBgn0016126	Calcium/calmodulin-dependent protein kinase I	CaMKI	30	24	57	97	27	50	31	63	40	27	29	36	58	40	40	38	16	28	38	30	44	26	24	23	20	32	18
FBgn0016131_Cdk4	FBgn0016131	Cyclin-dependent kinase 4	Cdk4	149	106	110	139	65	137	70	83	64	42	35	74	69	53	48	47	61	106	87	43	66	27	35	59	29	8	41
FBgn0016641_PTP-ER	FBgn0016641	Protein tyrosine phosphatase-ERK/Enhancer of Ras1	PTP-ER	22	12	18	17	12	12	8	18	9	12	3	17	23	21	19	4	4	10	15	8	16	8	5	5	10	8	10
FBgn0016650_Lgr1	FBgn0016650	Leucine-rich repeat-containing G protein-coupled receptor 1	Lgr1	6	3	3	4	2	1	7	2	4	3	0	1	0	3	0	4	2	0	0	2	10	1	0	2	0	0	1
FBgn0016660_H15	FBgn0016660	H15	H15	0	0	1	0	0	0	0	0	0	0	0	0	0	0	0	0	0	0	0	0	0	0	0	0	0	0	0
FBgn0016672_Ipp	FBgn0016672	Inositol polyphosphate 1-phosphatase	Ipp	288	182	189	370	108	158	263	183	104	97	83	128	215	153	218	88	89	114	298	84	107	95	69	126	233	133	138
FBgn0016675_Lectin-galC1	FBgn0016675	Galactose-specific C-type lectin	Lectin-galC1	3	0	2	0	1	2	7	5	1	1	0	1	0	0	1	6	3	1	2	1	0	1	0	2	1	0	0
FBgn0016684_NaPi-T	FBgn0016684	Na[+]-dependent inorganic phosphate cotransporter	NaPi-T	20	4	3	2	1	3	1	2	4	1	0	2	3	3	1	3	1	3	0	3	2	0	2	0	2	0	1
FBgn0016685_Nlp	FBgn0016685	Nucleoplasmin	Nlp	1157	892	878	516	199	364	524	443	318	316	305	391	603	575	529	170	171	352	313	160	300	158	140	162	226	221	258
FBgn0016687_Nurf-38	FBgn0016687	Nucleosome remodeling factor - 38kD	Nurf-38	1518	1061	1432	974	306	522	802	539	451	318	297	543	703	607	583	453	445	656	613	428	513	486	444	618	762	564	468
FBgn0016691_ATPsynO	FBgn0016691	ATP synthase, oligomycin sensitivity conferring protein	ATPsynO	4970	3575	5170	4811	1678	3063	3336	2190	1741	1328	1357	2048	2682	2405	2179	2424	2765	3328	1775	2184	2344	1942	1967	2983	3555	2644	2141
FBgn0016693_Past1	FBgn0016693	Putative Achaete Scute Target 1	Past1	1549	1273	1818	1916	617	1120	942	1074	665	603	521	880	906	768	824	706	535	727	917	422	584	530	504	683	549	611	504
FBgn0016694_Pdp1	FBgn0016694	PAR-domain protein 1	Pdp1	3514	3230	3373	2814	1030	1920	1366	1999	2033	1450	1348	1774	2956	2311	2001	1509	970	2171	1514	895	2148	1175	1050	1319	915	1043	1640
FBgn0016696_Pitslre	FBgn0016696	Pitslre	Pitslre	290	242	253	239	118	235	219	232	263	221	183	320	513	412	360	131	90	257	198	93	196	63	96	124	72	96	187
FBgn0016697_Prosalpha5	FBgn0016697	Proteasome alpha5 subunit	Prosalpha5	636	480	540	899	382	455	730	507	285	335	271	375	692	580	491	370	373	425	773	361	377	365	359	551	705	719	457
FBgn0016698_Ptpa	FBgn0016698	Phosphotyrosyl phosphatase activator	Ptpa	104	76	66	68	34	55	46	55	44	34	29	54	98	89	50	28	21	47	48	25	33	32	25	24	34	40	42
FBgn0016700_Rab1	FBgn0016700	Rab1	Rab1	614	771	1113	1275	463	821	1071	863	727	542	501	619	1141	1007	813	614	497	777	1150	595	631	552	558	501	767	641	658
FBgn0016701_Rab4	FBgn0016701	Rab4	Rab4	90	102	136	193	67	141	141	156	122	89	86	140	160	135	121	84	80	114	126	100	92	70	70	107	72	125	75
FBgn0016715_Reg-2	FBgn0016715	Rhythmically expressed gene 2	Reg-2	287	225	371	286	124	224	203	184	202	147	135	186	336	319	315	173	161	242	233	135	202	90	105	178	157	202	210
FBgn0016726_RpL29	FBgn0016726	Ribosomal protein L29	RpL29	6676	5250	7163	11630	3601	4916	13986	7310	5387	4630	5046	6616	10194	9042	9066	5040	4430	5331	6785	6017	5885	5293	5757	6264	8046	8337	5484
FBgn0016754_sba	FBgn0016754	six-banded	sba	35	50	67	80	28	73	47	72	97	62	53	100	139	126	110	37	19	62	61	25	52	24	39	37	23	26	45
FBgn0016756_Usp47	FBgn0016756	Ubiquitin specific protease 47	Usp47	376	272	327	349	164	347	214	351	316	240	195	363	572	412	431	120	136	335	503	152	241	120	123	180	130	119	238
FBgn0016762_angel	FBgn0016762	angel	angel	63	43	51	52	22	51	42	35	29	28	21	29	40	42	39	32	30	37	22	32	29	24	17	38	36	38	32
FBgn0016794_dos	FBgn0016794	daughter of sevenless	dos	12	15	29	23	10	24	14	21	24	14	14	18	19	14	12	12	8	15	15	4	10	12	13	15	11	9	6
FBgn0016797_fz2	FBgn0016797	frizzled 2	fz2	247	177	214	241	84	151	134	167	169	129	124	160	273	228	181	91	61	146	171	81	108	80	76	100	82	102	94
FBgn0016917_Stat92E	FBgn0016917	Signal-transducer and activator of transcription protein at 92E	Stat92E	1341	1241	1857	1192	584	1059	534	1065	1049	817	738	925	1357	1010	1008	531	483	1179	522	396	902	298	380	589	271	303	692
FBgn0016919_nompB	FBgn0016919	no mechanoreceptor potential B	nompB	0	0	0	1	0	0	0	1	0	0	0	0	0	0	1	0	0	0	0	0	0	0	0	0	0	0	0
FBgn0016920_nompC	FBgn0016920	no mechanoreceptor potential C	nompC	14	19	15	16	5	17	10	12	11	8	11	15	17	13	16	8	5	11	4	8	13	2	6	3	1	0	10
FBgn0016926_Pino	FBgn0016926	Pinocchio	Pino	75	90	96	105	31	113	38	56	141	80	50	77	105	88	76	48	23	90	50	59	81	32	63	36	36	24	65
FBgn0016930_Dyrk2	FBgn0016930	Dual-specificity tyrosine phosphorylation-regulated kinase 2	Dyrk2	88	79	115	57	29	51	24	46	46	38	41	51	52	34	46	30	17	33	18	15	38	11	15	16	16	10	17
FBgn0016970_l(2)k10201	FBgn0016970	lethal (2) k10201	l(2)k10201	18	14	12	19	13	11	15	13	8	3	9	8	16	8	19	14	9	14	10	9	5	11	6	8	20	16	12
FBgn0016974_swaPsi	FBgn0016974	swallow pseudogene	swaPsi	1	0	1	1	0	0	1	0	0	0	0	0	0	0	0	0	0	1	0	0	0	0	0	0	0	0	0
FBgn0016975_stnB	FBgn0016975	stoned B	stnB	0	0	0	0	0	0	0	0	0	0	0	0	0	0	0	0	0	0	0	0	0	0	0	0	0	0	0
FBgn0016976_stnA	FBgn0016976	stoned A	stnA	0	0	0	0	0	0	0	0	0	0	0	0	0	0	0	0	0	0	0	0	0	0	0	0	0	0	0
FBgn0016977_spen	FBgn0016977	split ends	spen	1094	991	1117	600	298	1038	592	637	1143	851	666	1217	1467	1415	1355	153	158	929	209	173	521	190	257	191	467	246	535
FBgn0016978_snRNP-U1-70K	FBgn0016978	small ribonucleoprotein particle U1 subunit 70K	snRNP-U1-70K	142	99	96	164	53	101	100	107	59	54	60	103	147	95	121	48	46	86	187	60	84	54	55	54	117	72	56
FBgn0016983_smid	FBgn0016983	smallminded	smid	53	33	48	48	14	36	18	40	38	29	20	33	29	20	34	21	23	28	16	21	33	15	26	13	10	11	17
FBgn0016984_sktl	FBgn0016984	skittles	sktl	309	268	378	600	265	392	395	437	310	307	265	343	628	476	419	203	194	330	452	191	327	208	234	365	313	329	309
FBgn0017414_cag	FBgn0017414	cag	cag	21	16	20	28	11	14	33	15	13	19	7	13	17	15	16	13	10	10	10	24	17	10	6	9	23	18	10
FBgn0017418_ari-1	FBgn0017418	ariadne 1	ari-1	294	223	261	329	150	243	149	260	220	176	156	216	210	203	205	144	130	230	138	132	245	91	121	171	105	98	101
FBgn0017424_CR11538	FBgn0017424	0	CR11538	0	0	0	0	0	0	0	0	0	0	0	0	0	0	0	0	0	0	0	0	0	0	0	0	0	0	0
FBgn0017429_CG5989	FBgn0017429	0	CG5989	260	187	215	262	84	143	194	155	116	92	66	110	194	114	138	98	99	129	144	95	105	88	57	137	129	110	81
FBgn0017430_Nelf-E	FBgn0017430	Negative elongation factor E	Nelf-E	26	29	40	33	9	14	31	30	15	18	16	25	25	21	15	32	20	22	12	10	13	9	6	21	12	16	14
FBgn0017448_CG2187	FBgn0017448	0	CG2187	7	2	0	0	0	0	0	0	0	0	0	0	1	1	1	1	0	1	1	0	0	0	1	0	0	0	0
FBgn0017456_Ubc84D	FBgn0017456	Ubiquitin conjugating enzyme 84D	Ubc84D	1	0	0	2	0	1	0	1	2	0	1	2	3	3	2	3	0	1	1	2	0	0	0	1	2	2	2
FBgn0017457_U2af38	FBgn0017457	U2 small nuclear riboprotein auxiliary factor 38	U2af38	138	108	105	117	40	78	157	81	78	60	46	75	169	131	90	64	49	88	129	53	87	61	44	67	127	81	60
FBgn0017482_T3dh	FBgn0017482	Type III alcohol dehydrogenase	T3dh	111	119	142	128	51	56	166	93	74	46	61	92	93	78	84	75	51	84	85	91	83	76	96	75	128	99	57
FBgn0017545_RpS3A	FBgn0017545	Ribosomal protein S3A	RpS3A	12920	8139	12319	11069	3694	7768	13618	8364	7385	5437	5547	8708	12885	10464	10246	4501	4126	7841	6572	3727	6352	3623	4385	5373	4745	4322	5434
FBgn0017550_Rga	FBgn0017550	Regena	Rga	279	212	221	214	93	163	117	164	127	113	107	166	212	199	185	71	79	107	107	64	108	50	66	88	58	76	93
FBgn0017551_Rca1	FBgn0017551	Regulator of cyclin A1	Rca1	13	16	10	16	6	11	17	25	9	11	10	10	21	15	15	8	13	13	12	6	8	8	4	13	10	18	6
FBgn0017556_Prosalpha4T2	FBgn0017556	Proteasome alpha4 subunit, Testis-specific 2	Prosalpha4T2	0	0	0	0	0	0	0	0	0	0	0	0	0	0	0	0	0	0	0	0	0	0	0	0	0	0	0
FBgn0017558_Pdk	FBgn0017558	Pyruvate dehydrogenase kinase	Pdk	209	184	294	346	161	311	256	246	297	189	209	334	472	409	395	170	142	339	183	109	212	79	110	158	85	108	232
FBgn0017561_Ork1	FBgn0017561	Open rectifier K[+] channel 1	Ork1	152	151	103	154	71	112	55	79	63	72	66	59	79	105	68	81	86	133	67	93	105	74	91	119	66	75	93
FBgn0017566_ND-75	FBgn0017566	NADH dehydrogenase (ubiquinone) 75 kDa subunit	ND-75	1374	1111	1296	1383	599	1031	1203	790	687	537	431	829	1550	1164	1032	742	879	1227	1790	708	796	653	603	944	1378	1170	965
FBgn0017567_ND-23	FBgn0017567	NADH dehydrogenase (ubiquinone) 23 kDa subunit	ND-23	733	688	970	642	288	555	352	448	387	257	248	396	539	490	406	381	415	625	408	370	401	364	332	479	400	350	354
FBgn0017572_Mo25	FBgn0017572	Mo25	Mo25	357	339	403	353	169	307	293	283	214	225	174	273	477	337	356	154	143	298	400	143	224	128	140	184	180	168	261
FBgn0017577_Mcm5	FBgn0017577	Minichromosome maintenance 5	Mcm5	25	20	25	7	2	2	4	7	8	4	4	8	4	3	5	3	2	5	2	0	3	5	2	5	7	2	3
FBgn0017578_Max	FBgn0017578	Max	Max	100	62	64	85	38	61	90	75	63	57	42	78	131	116	87	37	21	61	66	36	67	23	31	61	46	60	64
FBgn0017579_RpL14	FBgn0017579	Ribosomal protein L14	RpL14	7222	5303	6962	9634	3325	5289	12650	7706	5738	4891	4886	7203	12080	10139	10009	4354	3950	5543	7770	4947	5718	4921	5220	6153	10645	8185	5493
FBgn0017581_Lk6	FBgn0017581	Lk6 kinase	Lk6	1764	1396	1846	2372	953	1979	1875	2390	2263	1733	1523	2532	3698	2815	3181	891	824	1977	1837	818	1716	624	899	1069	1276	811	1397
FBgn0017590_klg	FBgn0017590	klingon	klg	16	18	22	2	3	4	4	2	2	1	3	2	2	2	6	3	1	3	4	1	0	1	1	1	2	1	1
FBgn0019624_COX5A	FBgn0019624	Cytochrome c oxidase subunit 5A	COX5A	3915	3416	4163	6659	2345	2881	7011	2364	1823	1503	1431	1778	3820	3659	3062	3077	3837	3527	3441	2871	2384	2257	2105	2823	7398	5774	3167
FBgn0019637_Atu	FBgn0019637	Another transcription unit	Atu	216	123	160	193	58	99	148	136	106	87	69	115	171	169	156	59	56	83	131	63	103	64	60	94	80	100	72
FBgn0019643_Dat	FBgn0019643	Dopamine N acetyltransferase	Dat	5070	3060	3585	8209	3157	5025	6416	5220	3782	2548	2983	4620	6827	3745	4802	4200	3712	5034	17914	3693	4837	2953	3357	5645	7354	4363	4220
FBgn0019644_ATPsynB	FBgn0019644	ATP synthase, subunit B	ATPsynB	3081	2118	2817	3711	1169	1931	3613	1372	1185	911	929	1433	1968	1678	1867	1538	1822	2112	1397	1299	1445	1264	1290	1845	3851	1986	1488
FBgn0019650_toy	FBgn0019650	twin of eyeless	toy	0	0	0	1	0	0	1	0	1	0	0	0	0	1	3	0	0	1	0	0	0	0	1	0	0	0	0
FBgn0019660_roX2	FBgn0019660	RNA on the X 2	roX2	0	0	0	6	1	0	1	2	1	0	0	0	1	1	0	2	1	1	0	0	0	0	1	1	0	0	0
FBgn0019661_roX1	FBgn0019661	RNA on the X 1	roX1	17	11	4	10	2	3	8	9	10	16	9	12	12	5	8	5	6	9	8	3	7	5	6	10	1	1	6
FBgn0019662_qm	FBgn0019662	quemao	qm	134	91	161	80	31	82	61	66	73	34	25	91	76	80	81	34	35	60	60	32	54	21	29	32	22	40	55
FBgn0019686_lok	FBgn0019686	loki	lok	26	25	34	25	12	31	21	34	35	10	27	28	34	19	19	12	6	24	23	10	29	14	20	17	21	8	9
FBgn0019809_gcm2	FBgn0019809	gcm2	gcm2	2	0	0	2	0	2	6	0	1	1	0	2	0	0	0	0	1	0	6	0	0	0	1	3	0	0	0
FBgn0019828_dj	FBgn0019828	don juan	dj	3	3	5	2	4	1	0	1	0	0	0	1	0	0	0	0	0	2	0	0	0	0	2	0	1	0	0
FBgn0019830_colt	FBgn0019830	congested-like trachea	colt	460	395	611	819	307	525	789	372	342	298	269	436	537	473	686	411	423	565	408	346	531	339	394	560	731	470	436
FBgn0019886_Letm1	FBgn0019886	LETM1 ortholog	Letm1	330	264	384	252	162	349	248	294	286	238	231	297	507	379	340	107	103	377	262	101	253	74	93	131	75	93	313
FBgn0019890_Smg5	FBgn0019890	Smg5	Smg5	77	77	104	143	57	99	80	120	91	70	71	122	138	121	92	59	61	95	70	42	74	34	49	65	39	54	58
FBgn0019925_Surf4	FBgn0019925	Surfeit 4	Surf4	617	587	805	859	338	583	711	494	423	319	307	584	822	591	600	395	450	729	684	400	601	382	407	638	549	390	625
FBgn0019928_Ser8	FBgn0019928	Ser8	Ser8	63	109	74	1434	498	643	1666	1105	664	639	677	652	972	541	675	791	726	1183	1216	957	1010	887	1063	1503	3900	2628	1052
FBgn0019929_Ser7	FBgn0019929	Ser7	Ser7	5	4	11	4	0	6	3	0	1	2	0	2	2	2	0	3	1	4	0	0	0	0	1	1	1	0	2
FBgn0019932_SamDC	FBgn0019932	S-adenosylmethionine decarboxylase	SamDC	37	37	55	56	19	36	33	38	27	26	24	34	36	16	34	33	15	26	40	22	28	15	13	18	26	23	10
FBgn0019936_RpS20	FBgn0019936	Ribosomal protein S20	RpS20	7384	6272	8129	8275	3432	5951	8172	8770	7051	6044	5528	7626	12280	11162	9534	3900	3507	6788	5231	4368	6481	3532	3721	4618	3933	5506	5247
FBgn0019938_RpI1	FBgn0019938	RNA polymerase I subunit	RpI1	527	411	350	157	92	164	159	219	204	186	132	172	396	251	218	83	44	174	202	114	185	88	81	126	81	147	134
FBgn0019940_Rh6	FBgn0019940	Rhodopsin 6	Rh6	1	0	0	1	1	0	1	0	0	0	0	0	3	0	0	0	0	1	0	1	1	0	1	0	1	0	1
FBgn0019947_Psn	FBgn0019947	Presenilin	Psn	199	118	146	226	85	128	171	162	112	104	93	144	155	128	109	86	67	112	198	77	93	94	84	142	101	110	119
FBgn0019949_Cdk9	FBgn0019949	Cyclin-dependent kinase 9	Cdk9	46	28	34	30	14	27	33	34	23	15	23	30	34	38	29	12	12	26	24	12	25	10	12	11	11	16	25
FBgn0019952_Orct	FBgn0019952	Organic cation transporter	Orct	81	73	91	61	23	58	46	47	36	21	22	42	52	40	46	47	29	46	41	41	55	53	31	77	27	52	73
FBgn0019957_ND-42	FBgn0019957	NADH dehydrogenase (ubiquinone) 42 kDa subunit	ND-42	1467	1057	1482	954	405	951	850	659	577	472	398	740	1150	895	838	533	573	1070	709	525	645	407	395	684	546	609	665
FBgn0019960_Mitofilin	FBgn0019960	Mitofilin	Mitofilin	362	319	409	290	126	248	194	195	187	134	115	200	299	233	230	151	159	260	256	158	179	137	124	206	166	183	153
FBgn0019968_Khc-73	FBgn0019968	Kinesin heavy chain 73	Khc-73	128	185	283	216	91	203	104	187	184	142	126	179	175	156	157	74	43	148	98	66	114	31	77	43	46	34	68
FBgn0019972_Drice	FBgn0019972	Death related ICE-like caspase	Drice	62	39	71	132	52	61	85	107	67	58	48	66	84	73	52	55	49	43	134	53	58	42	45	94	60	55	47
FBgn0019982_Gs1l	FBgn0019982	GS1-like	Gs1l	1253	772	988	695	221	371	708	341	241	216	222	387	536	376	365	296	300	444	548	245	343	296	320	420	790	432	372
FBgn0019985_mGluR	FBgn0019985	metabotropic Glutamate Receptor	mGluR	0	1	3	7	1	1	0	1	0	0	0	0	0	1	0	1	3	0	0	1	1	0	1	0	0	0	0
FBgn0019990_Gcn2	FBgn0019990	Gcn2	Gcn2	24	20	21	21	11	17	7	13	23	11	17	24	34	28	27	7	7	17	6	6	15	4	6	9	5	4	15
FBgn0020018_Ppox	FBgn0020018	Protoporphyrinogen oxidase	Ppox	159	111	162	171	59	96	153	96	67	42	43	71	115	98	89	83	85	97	102	62	67	50	63	63	134	82	85
FBgn0020224_Cbl	FBgn0020224	Cbl proto-oncogene ortholog	Cbl	24	40	37	52	19	51	37	61	54	35	36	57	113	73	41	18	13	39	35	34	38	25	24	35	22	27	42
FBgn0020235_ATPsyngamma	FBgn0020235	ATP synthase, gamma subunit	ATPsyngamma	1988	1502	2127	1740	738	1289	1621	955	737	557	591	866	1418	1209	1095	907	1047	1290	997	733	874	656	694	1071	1468	1154	923
FBgn0020236_ATPCL	FBgn0020236	ATP citrate lyase	ATPCL	1648	1175	2401	513	206	367	225	253	278	160	187	285	384	260	283	229	167	311	226	111	267	103	178	250	174	233	303
FBgn0020238_14-3-3epsilon	FBgn0020238	14-3-3epsilon	14-3-3epsilon	2148	2194	2619	2381	894	1659	1893	1710	1209	1152	889	1299	2431	2069	1787	723	572	1126	1724	618	844	594	751	634	928	844	988
FBgn0020248_stet	FBgn0020248	stem cell tumor	stet	1	0	2	1	3	3	1	7	2	0	1	3	0	2	0	4	0	0	0	4	0	0	0	0	4	2	0
FBgn0020249_stck	FBgn0020249	steamer duck	stck	246	249	447	526	165	359	333	357	258	207	201	288	436	330	333	206	148	299	299	146	229	143	155	178	160	176	192
FBgn0020251_sfl	FBgn0020251	sulfateless	sfl	221	175	220	213	116	171	127	184	164	156	137	139	208	200	173	115	107	170	113	109	176	95	82	144	69	95	143
FBgn0020255_Ran	FBgn0020255	Ran	Ran	1719	1354	1389	1055	376	637	953	718	564	444	397	621	966	772	675	390	323	653	632	299	487	326	362	428	438	414	450
FBgn0020257_Ppa	FBgn0020257	Partner of paired	Ppa	354	322	323	560	287	364	272	530	369	323	324	349	538	421	353	307	263	342	353	258	322	255	249	382	215	290	258
FBgn0020258_ppk	FBgn0020258	pickpocket	ppk	1	0	0	0	0	0	2	3	3	0	1	2	1	1	5	0	0	1	0	0	0	0	0	3	0	0	0
FBgn0020261_pcm	FBgn0020261	pacman	pcm	75	62	61	47	21	36	30	55	51	30	33	56	57	38	36	37	29	40	35	25	34	22	24	39	14	24	33
FBgn0020269_mspo	FBgn0020269	M-spondin	mspo	26	9	21	24	6	13	13	18	11	2	10	7	17	9	10	9	6	12	17	3	9	8	2	5	4	2	9
FBgn0020270_mre11	FBgn0020270	meiotic recombination 11	mre11	146	105	104	103	47	76	123	147	113	87	77	142	150	117	108	50	49	83	64	47	99	42	52	65	51	42	71
FBgn0020272_mst	FBgn0020272	misato	mst	71	32	43	49	18	23	40	44	36	21	24	34	50	32	36	19	4	17	56	13	18	9	19	20	22	14	14
FBgn0020277_lush	FBgn0020277	lush	lush	0	0	0	0	0	0	0	0	0	0	0	0	0	0	0	0	0	0	0	0	0	0	0	0	0	0	0
FBgn0020278_loco	FBgn0020278	locomotion defects	loco	81	81	124	117	30	86	89	123	69	68	71	81	83	66	73	43	27	59	58	50	59	29	41	50	36	52	48
FBgn0020279_lig	FBgn0020279	lingerer	lig	101	111	115	149	50	88	95	98	81	53	43	85	195	121	96	51	43	69	225	44	59	44	38	49	76	68	57
FBgn0020280_laf	FBgn0020280	labial associated factor	laf	0	0	0	0	0	0	0	0	0	0	0	2	0	0	0	0	0	0	0	0	0	0	0	0	0	0	0
FBgn0020294_ko	FBgn0020294	knockout	ko	17	18	16	6	3	10	3	2	8	0	1	8	13	8	10	3	5	8	2	1	9	1	1	5	1	5	9
FBgn0020299_stumps	FBgn0020299	stumps	stumps	30	25	38	24	6	14	22	13	15	9	13	14	13	20	14	4	9	22	6	6	20	9	6	10	6	4	10
FBgn0020300_geko	FBgn0020300	geko	geko	9	7	8	15	3	15	16	10	12	4	4	11	4	8	8	4	7	11	1	4	7	3	5	5	3	3	6
FBgn0020304_drongo	FBgn0020304	drongo	drongo	235	190	203	204	85	129	78	161	172	94	98	182	130	126	139	55	64	114	87	55	112	53	66	77	52	43	68
FBgn0020305_dbe	FBgn0020305	dribble	dbe	136	103	77	109	42	55	147	84	44	52	56	56	103	82	84	44	37	57	77	53	54	62	58	55	126	108	59
FBgn0020306_dom	FBgn0020306	domino	dom	220	161	169	165	63	126	106	201	194	135	138	193	230	197	170	45	45	150	61	72	103	45	66	68	38	43	73
FBgn0020307_dve	FBgn0020307	defective proventriculus	dve	299	208	214	251	98	187	52	209	203	165	157	178	146	139	157	124	87	223	83	114	174	69	105	96	16	23	70
FBgn0020309_crol	FBgn0020309	crooked legs	crol	279	246	251	264	108	198	135	222	223	177	180	247	403	307	322	106	96	200	265	87	158	59	79	118	72	84	176
FBgn0020312_CG4050	FBgn0020312	0	CG4050	55	71	65	51	27	52	42	58	44	26	35	58	84	51	47	24	28	38	46	24	59	30	19	43	40	42	44
FBgn0020369_Rpt6	FBgn0020369	Regulatory particle triple-A ATPase 6	Rpt6	818	649	755	988	425	493	909	585	438	434	300	469	836	719	666	390	367	498	704	387	454	388	345	523	758	787	572
FBgn0020370_TppII	FBgn0020370	tripeptidyl-peptidase II	TppII	263	172	246	208	83	196	130	157	141	142	107	178	192	183	171	93	76	174	149	95	143	77	93	176	76	105	119
FBgn0020371_Tim17b2	FBgn0020371	Translocase inner membrane 17	Tim17b2	0	0	0	0	0	0	0	0	0	0	0	0	0	0	0	0	0	0	0	0	0	0	0	0	0	0	0
FBgn0020372_TM4SF	FBgn0020372	Transmembrane 4 superfamily	TM4SF	4	6	3	2	0	3	1	0	0	0	0	0	1	0	0	2	1	1	1	0	0	0	1	1	0	0	0
FBgn0020376_Sr-CIII	FBgn0020376	Scavenger receptor class C, type III	Sr-CIII	0	0	0	0	0	0	0	0	0	0	0	0	0	0	0	0	0	0	0	0	0	0	0	0	0	0	0
FBgn0020377_Sr-CII	FBgn0020377	Scavenger receptor class C, type II	Sr-CII	0	0	0	0	0	0	0	0	0	0	0	0	0	0	0	0	0	0	0	0	0	0	0	0	0	0	0
FBgn0020378_Sp1	FBgn0020378	Sp1	Sp1	0	0	0	1	0	0	2	2	1	1	1	1	0	4	1	1	1	0	0	0	2	1	0	0	1	1	0
FBgn0020379_Rfx	FBgn0020379	Rfx	Rfx	12	7	9	11	5	8	5	18	12	7	5	19	13	12	19	6	7	11	8	5	6	3	6	6	2	1	7
FBgn0020381_Dredd	FBgn0020381	Death related ced-3/Nedd2-like caspase	Dredd	81	61	60	119	46	77	78	80	89	60	62	88	139	110	88	42	31	87	68	53	80	46	35	72	65	52	64
FBgn0020385_pug	FBgn0020385	pugilist	pug	130	132	204	207	62	128	136	85	88	53	57	99	125	97	104	120	119	169	199	69	98	84	69	95	139	72	100
FBgn0020386_Pdk1	FBgn0020386	Phosphoinositide-dependent kinase 1	Pdk1	174	161	261	395	127	267	261	341	403	318	247	380	547	437	539	227	97	259	336	295	402	360	332	230	199	173	250
FBgn0020388_Gcn5	FBgn0020388	Gcn5 ortholog	Gcn5	57	51	73	123	41	41	97	108	51	48	52	63	105	63	74	67	46	80	94	67	57	63	53	80	76	120	78
FBgn0020389_Papss	FBgn0020389	PAPS synthetase	Papss	51	203	217	102	35	57	70	56	44	34	38	41	68	61	47	43	35	56	49	30	40	41	47	25	22	36	33
FBgn0020391_Nrk	FBgn0020391	Neurospecific receptor kinase	Nrk	0	1	4	0	0	3	0	3	2	1	1	1	4	0	1	3	0	3	1	1	1	1	1	3	1	1	2
FBgn0020392_Nmt	FBgn0020392	N-myristoyl transferase	Nmt	162	120	111	91	33	67	46	59	48	42	54	53	95	69	66	38	33	79	47	40	58	18	32	62	24	35	37
FBgn0020399_Mst89B	FBgn0020399	Mst89B	Mst89B	0	0	0	0	0	0	0	0	2	0	0	0	0	0	0	0	0	0	0	0	1	0	0	0	1	0	0
FBgn0020407_asun	FBgn0020407	asunder	asun	26	21	21	24	8	19	17	20	18	23	11	18	31	24	14	9	8	22	13	14	17	9	12	13	13	13	19
FBgn0020412_JIL-1	FBgn0020412	JIL-1 kinase	JIL-1	283	249	288	282	114	243	235	204	194	164	147	236	428	404	356	104	96	239	242	103	222	76	79	120	139	136	212
FBgn0020414_Idgf3	FBgn0020414	Imaginal disc growth factor 3	Idgf3	112	74	165	382	152	205	292	229	137	126	93	146	173	135	117	119	43	83	96	60	58	47	66	49	52	78	55
FBgn0020415_Idgf2	FBgn0020415	Imaginal disc growth factor 2	Idgf2	27	17	16	32	3	25	45	22	10	13	14	18	32	23	24	8	2	7	27	7	14	5	8	10	8	9	12
FBgn0020416_Idgf1	FBgn0020416	Imaginal disc growth factor 1	Idgf1	22	9	8	12	4	5	29	12	8	16	9	14	13	6	23	10	7	7	7	1	6	1	3	0	2	6	15
FBgn0020429_GluRIIB	FBgn0020429	Glutamate receptor IIB	GluRIIB	0	0	0	0	0	0	0	2	0	0	0	0	1	0	0	0	0	0	0	0	0	0	0	0	0	0	0
FBgn0020440_Fak	FBgn0020440	Focal adhesion kinase	Fak	238	181	246	261	120	196	138	203	152	135	103	162	277	226	166	104	85	191	138	117	152	59	70	97	55	92	137
FBgn0020443_Elf	FBgn0020443	Ef1alpha-like factor	Elf	415	305	311	277	130	180	118	208	179	150	134	198	211	162	179	120	110	208	114	96	178	106	90	128	82	71	121
FBgn0020445_E23	FBgn0020445	Early gene at 23	E23	108	59	53	36	12	36	8	28	22	14	19	30	39	27	27	15	11	24	10	13	20	17	11	13	12	4	20
FBgn0020493_Dad	FBgn0020493	Daughters against dpp	Dad	184	121	103	134	54	146	76	105	117	97	96	156	152	97	105	42	31	143	33	46	100	39	40	46	35	34	58
FBgn0020496_CtBP	FBgn0020496	C-terminal Binding Protein	CtBP	1512	1056	1154	1217	477	721	616	852	641	620	585	731	1071	895	832	512	411	746	650	402	664	439	425	608	492	460	644
FBgn0020497_emb	FBgn0020497	embargoed	emb	418	276	328	206	80	208	107	198	207	179	175	238	262	261	260	52	49	185	74	52	156	36	52	67	53	41	107
FBgn0020503_CLIP-190	FBgn0020503	Cytoplasmic linker protein 190	CLIP-190	640	419	525	452	184	366	265	372	387	286	296	433	488	430	406	189	137	386	243	182	316	154	166	217	164	117	251
FBgn0020506_Amyrel	FBgn0020506	Amyrel	Amyrel	84	39	74	540	164	141	190	64	29	10	10	24	20	9	3	235	211	197	288	42	72	54	45	216	267	95	82
FBgn0020508_Ag5r2	FBgn0020508	Antigen 5-related 2	Ag5r2	1125	929	1778	6210	2295	2329	5939	2204	1652	980	1038	1180	1576	1208	869	2392	1718	2155	2617	2497	1803	2649	2587	2429	8495	4936	2329
FBgn0020509_Acp62F	FBgn0020509	Accessory gland protein 62F	Acp62F	0	0	0	0	0	0	0	0	0	0	0	0	0	0	0	1	0	0	0	0	0	0	0	0	0	0	0
FBgn0020510_Abi	FBgn0020510	Abelson interacting protein	Abi	36	39	36	62	29	42	35	44	39	28	20	35	60	55	43	11	20	32	26	21	33	13	18	25	15	11	34
FBgn0020513_ade5	FBgn0020513	ade5	ade5	357	325	223	292	83	88	104	131	138	107	87	88	96	100	103	105	81	84	47	95	98	94	68	74	52	111	67
FBgn0020518_snoRNA:Me28S-G764	FBgn0020518	0	snoRNA:Me28S-G764	3	3	0	2	0	3	1	5	0	3	3	2	0	0	1	1	1	4	0	2	1	4	0	0	0	1	1
FBgn0020521_pio	FBgn0020521	piopio	pio	221	178	313	126	53	178	65	81	106	31	68	129	94	74	121	51	42	145	44	41	89	38	38	48	22	40	61
FBgn0020545_kraken	FBgn0020545	kraken	kraken	465	329	448	602	215	318	989	493	419	305	300	515	639	626	593	274	228	325	836	409	444	361	412	584	877	712	519
FBgn0020546_iab-4	FBgn0020546	iab-4	iab-4	0	0	0	0	0	0	0	0	0	0	0	0	0	1	0	0	1	0	0	0	0	0	0	0	0	1	0
FBgn0020556_bxd	FBgn0020556	bithoraxoid	bxd	0	3	3	3	0	1	0	1	1	2	2	1	0	2	2	1	0	1	1	0	0	3	3	0	1	0	1
FBgn0020616_SA	FBgn0020616	Stromalin	SA	48	26	49	22	16	20	21	19	31	25	16	31	46	41	35	6	6	25	11	5	22	5	5	10	7	9	22
FBgn0020617_Rx	FBgn0020617	Retinal Homeobox	Rx	0	0	0	0	0	0	0	0	0	0	0	0	0	0	0	0	0	0	0	0	0	0	0	0	0	0	0
FBgn0020618_Rack1	FBgn0020618	Receptor of activated protein kinase C 1	Rack1	10367	8040	11102	11490	4648	7625	10914	10309	7448	6450	6518	8719	12400	10945	10094	5910	5207	8250	6232	6386	8422	5500	5564	7671	5821	5846	5794
FBgn0020620_RN-tre	FBgn0020620	Related to the N terminus of tre oncogene	RN-tre	36	29	49	35	12	37	17	32	26	16	19	21	29	26	32	14	14	22	19	11	27	10	10	17	9	7	15
FBgn0020621_Pkn	FBgn0020621	Protein kinase N	Pkn	251	214	294	233	94	209	104	202	183	136	146	197	205	175	145	61	50	173	89	57	112	42	58	92	45	55	86
FBgn0020622_Pi3K21B	FBgn0020622	Pi3K21B	Pi3K21B	367	274	240	378	140	215	230	270	176	191	149	191	228	182	165	111	88	138	126	89	107	74	87	134	170	132	133
FBgn0020626_Osbp	FBgn0020626	Oxysterol binding protein	Osbp	126	117	151	168	67	115	113	90	77	70	63	71	94	103	103	88	68	111	109	73	101	72	101	116	74	113	96
FBgn0020633_Mcm7	FBgn0020633	Minichromosome maintenance 7	Mcm7	43	25	30	8	2	9	7	6	3	9	2	3	10	2	0	3	5	10	2	2	1	2	1	4	2	9	3
FBgn0020637_Lcp65Ag2	FBgn0020637	Lcp65Ag2	Lcp65Ag2	0	0	0	0	0	0	0	0	0	0	0	0	0	0	0	0	0	0	0	0	0	0	0	0	0	0	0
FBgn0020638_Lcp65Ag1	FBgn0020638	Lcp65Ag1	Lcp65Ag1	0	0	0	0	0	0	0	0	0	0	0	0	0	0	0	0	0	0	0	0	0	0	0	0	0	0	0
FBgn0020639_Lcp65Af	FBgn0020639	Lcp65Af	Lcp65Af	0	0	0	0	0	0	0	0	0	0	0	0	0	0	0	0	0	0	0	0	0	0	0	0	0	0	0
FBgn0020640_Lcp65Ae	FBgn0020640	Lcp65Ae	Lcp65Ae	0	0	0	0	0	1	0	0	0	0	0	0	0	0	0	0	0	1	0	0	0	0	0	0	0	0	0
FBgn0020641_Lcp65Ad	FBgn0020641	Lcp65Ad	Lcp65Ad	0	0	0	0	0	0	0	0	0	0	0	0	0	0	0	0	0	0	0	0	0	0	0	0	0	0	0
FBgn0020642_Lcp65Ac	FBgn0020642	Lcp65Ac	Lcp65Ac	0	0	0	0	0	0	0	0	0	0	0	0	0	0	0	0	0	0	0	0	0	0	0	0	0	0	0
FBgn0020643_Lcp65Ab2	FBgn0020643	Lcp65Ab2	Lcp65Ab2	0	0	0	0	0	0	0	0	0	0	0	0	0	0	0	0	0	0	0	0	0	0	0	0	0	0	0
FBgn0020644_Lcp65Ab1	FBgn0020644	Lcp65Ab1	Lcp65Ab1	0	0	0	0	0	0	0	0	0	0	0	0	0	0	0	0	0	0	0	0	0	0	0	0	0	0	0
FBgn0020645_Lcp65Aa	FBgn0020645	Lcp65Aa	Lcp65Aa	0	0	0	0	0	0	0	0	0	0	0	0	0	0	0	0	0	0	0	0	0	0	0	0	0	0	0
FBgn0020646_Lcp65APsi	FBgn0020646	Lcp65APsi	Lcp65APsi	0	0	0	0	0	0	0	0	0	0	0	0	0	0	0	0	0	0	0	0	0	0	0	0	0	0	0
FBgn0020647_KrT95D	FBgn0020647	Krueppel target at 95D	KrT95D	169	122	144	173	56	127	100	115	91	61	82	121	194	183	153	51	53	109	87	51	80	35	49	56	28	42	65
FBgn0020653_Trxr-1	FBgn0020653	Thioredoxin reductase-1	Trxr-1	1506	1238	1419	940	444	812	778	761	602	478	429	678	1321	989	1076	572	543	862	887	459	747	499	490	699	813	873	887
FBgn0020655_ArfGAP1	FBgn0020655	ADP-ribosylation factor GTPase activating protein 1	ArfGAP1	430	306	360	325	163	254	240	211	183	152	114	180	326	289	289	172	158	257	294	224	247	208	171	257	230	284	305
FBgn0020660_eIF-4B	FBgn0020660	Eukaryotic initiation factor 4B	eIF-4B	139	91	143	74	23	82	33	59	67	57	42	70	67	39	52	24	19	85	45	22	39	21	24	20	10	8	30
FBgn0020762_Atet	FBgn0020762	ABC transporter expressed in trachea	Atet	560	435	413	206	63	227	117	164	137	109	85	147	219	157	132	86	49	152	103	68	124	96	64	180	81	94	148
FBgn0020764_Alas	FBgn0020764	Aminolevulinate synthase	Alas	323	357	453	326	174	211	238	237	201	148	129	213	365	264	260	218	216	303	280	219	277	184	169	209	382	561	400
FBgn0020765_Acp65Aa	FBgn0020765	Adult cuticle protein 65Aa	Acp65Aa	8	2	10	20	5	4	6	0	1	0	0	2	0	0	0	142	1	11	1	3	0	1	0	2	0	2	0
FBgn0020767_Spred	FBgn0020767	Sprouty-related protein with EVH-1 domain	Spred	103	85	110	154	63	108	91	121	101	85	60	127	130	77	102	63	52	97	98	64	78	46	70	73	56	66	55
FBgn0020880_CG7179	FBgn0020880	0	CG7179	9	12	18	9	7	8	6	2	3	2	0	1	2	3	3	1	2	7	1	1	0	3	0	2	4	1	0
FBgn0020887_Su(z)12	FBgn0020887	Su(z)12	Su(z)12	18	34	17	20	13	20	18	22	18	16	10	15	27	25	9	10	9	17	12	8	15	8	10	9	6	10	9
FBgn0020906_Jon25Bi	FBgn0020906	Jonah 25Bi	Jon25Bi	409	849	1151	43856	16635	13744	20915	12920	10434	4046	5021	5738	6510	5628	2272	49249	30804	38974	43132	54743	38413	56702	53940	85079	116440	93808	83191
FBgn0020907_Scp2	FBgn0020907	Sarcoplasmic calcium-binding protein 2	Scp2	39	8	5	5	2	28	21	8	4	2	0	21	6	10	2	8	2	2	2	2	1	4	8	6	3	1	1
FBgn0020908_Scp1	FBgn0020908	Sarcoplasmic calcium-binding protein 1	Scp1	0	0	5	6	0	1	0	2	1	1	19	2	0	1	1	1	0	2	0	0	1	0	1	1	1	3	0
FBgn0020909_Rtc1	FBgn0020909	Rtc1	Rtc1	83	70	64	75	16	49	95	78	73	37	45	61	102	55	56	27	14	24	69	38	39	32	32	34	71	48	37
FBgn0020910_RpL3	FBgn0020910	Ribosomal protein L3	RpL3	13551	10302	13914	9277	4555	9344	6550	12022	9334	8185	8166	10075	15929	13725	11584	5175	4505	9956	6277	6585	9571	5011	5264	7207	4277	5854	6673
FBgn0020912_Ptx1	FBgn0020912	Ptx1	Ptx1	89	98	104	89	37	90	68	114	105	68	69	126	165	129	120	33	34	110	36	22	51	18	25	24	11	12	44
FBgn0020930_Dgkepsilon	FBgn0020930	Diacyl glycerol kinase epsilon	Dgkepsilon	9	10	16	29	10	18	15	12	13	12	9	17	16	24	27	7	11	14	26	5	14	5	7	10	21	17	15
FBgn0021738_Crg-1	FBgn0021738	Circadianly Regulated Gene	Crg-1	0	0	0	0	1	0	0	0	0	0	0	0	0	0	0	0	1	0	0	0	0	0	0	0	0	0	0
FBgn0021742_C901	FBgn0021742	C901	C901	0	0	0	0	0	0	0	0	0	0	1	0	0	0	0	0	0	0	0	0	0	0	0	0	0	0	0
FBgn0021750_SerRS-m	FBgn0021750	Seryl-tRNA synthetase, mitochondrial	SerRS-m	46	18	52	9	11	22	18	16	14	12	16	17	24	30	13	7	14	14	41	17	19	12	9	13	20	14	12
FBgn0021760_chb	FBgn0021760	chromosome bows	chb	199	178	197	141	58	128	64	133	114	95	93	132	143	109	95	57	52	111	63	54	85	29	47	45	39	35	76
FBgn0021761_Nup154	FBgn0021761	Nucleoporin 154kD	Nup154	77	76	73	45	19	47	40	52	59	38	45	51	69	67	50	11	16	48	33	22	39	18	17	23	14	7	36
FBgn0021764_sdk	FBgn0021764	sidekick	sdk	87	75	104	72	29	67	36	60	38	41	29	75	41	33	36	23	17	55	24	12	32	16	20	20	16	7	30
FBgn0021765_scu	FBgn0021765	scully	scu	1057	809	920	1212	483	633	1179	568	487	315	354	491	722	553	615	613	531	659	741	553	638	465	440	662	969	585	545
FBgn0021767_org-1	FBgn0021767	optomotor-blind-related-gene-1	org-1	71	51	50	34	16	32	18	29	28	11	18	37	19	21	15	14	14	20	4	1	16	1	9	6	3	4	18
FBgn0021768_nudC	FBgn0021768	nudC	nudC	186	121	131	83	27	54	82	67	50	28	50	65	81	63	58	41	35	40	83	40	48	36	47	62	58	57	35
FBgn0021776_mira	FBgn0021776	miranda	mira	12	13	12	25	6	17	26	33	23	20	14	25	50	30	35	9	10	24	26	22	25	20	31	35	18	24	25
FBgn0021795_Tapdelta	FBgn0021795	Translocon-associated protein delta	Tapdelta	2807	2103	2763	2449	1048	1742	2116	1446	1088	1036	856	1280	2564	2220	1900	1563	1773	2449	2127	1398	2161	1589	1337	2316	2714	1778	2184
FBgn0021796_Tor	FBgn0021796	Target of rapamycin	Tor	39	50	66	45	17	58	36	33	46	32	19	61	81	41	63	18	8	38	30	9	45	13	28	13	11	9	41
FBgn0021800_Reph	FBgn0021800	Regulator of eph expression	Reph	196	170	136	224	75	127	119	165	143	88	75	125	194	165	165	120	60	153	182	89	192	117	85	106	133	123	167
FBgn0021814_Vps28	FBgn0021814	Vacuolar protein sorting 28	Vps28	225	154	206	401	132	193	444	236	145	152	136	199	284	233	214	139	108	148	209	144	146	153	153	209	237	182	181
[truncated: 15,481 more rows]
