# Supplementary material for: Multiscale analysis reveals that diet-dependent midgut plasticity emerges from alterations in both stem cell niche coupling and enterocyte size
Source: eLife. 2021 Sep 23;10:e64125. doi: 10.7554/eLife.64125 (PMC8528489; doi:10.7554/eLife.64125)
Supplement: Figure 5—source data 2. [file elife-64125-fig5-data2.csv]

GO.ID	Term	Annotated	Significant	Expected	classicFisher	Diet	p.value
GO:0006508	proteolysis	942	170	106.59	1.20E-10	HY	1.20E-10
GO:0005975	carbohydrate metabolic process	261	62	29.53	7.60E-09	HY	7.60E-09
GO:0006633	fatty acid biosynthetic process	70	18	7.92	0.0006	HY	0.0006
GO:0015918	sterol transport	14	5	1.58	0.01535	HY	0.01535
GO:0009888	tissue development	1071	311	122.89	< 1e-30	HS	1.00E-30
GO:0019222	regulation of metabolic process	2234	496	256.34	< 1e-30	HS	1.00E-30
GO:0023052	signaling	1703	393	195.41	< 1e-30	HS	1.00E-30
GO:0040007	growth	436	155	50.03	< 1e-30	HS	1.00E-30
GO:0006950	response to stress	1249	279	143.32	< 1e-30	HS	1.00E-30
GO:0008283	cell proliferation	314	105	36.03	1.10E-25	HS	1.10E-25
GO:0012501	programmed cell death	333	91	38.21	6.30E-16	HS	6.30E-16
GO:0007254	JNK cascade	71	32	8.15	1.00E-12	HS	1.00E-12
GO:0007173	epidermal growth factor receptor signaling	81	34	9.29	2.50E-12	HS	2.50E-12
GO:0017148	negative regulation of translation	68	26	7.8	1.00E-08	HS	1.00E-08
GO:0016055	Wnt signaling pathway	130	38	14.92	2.90E-08	HS	2.90E-08
GO:0007259	JAK-STAT cascade	38	18	4.36	3.70E-08	HS	3.70E-08
GO:0007219	Notch signaling pathway	88	27	10.1	1.00E-06	HS	1.00E-06
GO:0006914	autophagy	185	44	21.23	1.60E-06	HS	1.60E-06
GO:0006979	response to oxidative stress	140	29	15.84	0.00087	HY	0.00087
