# Supplementary material for: Multiscale analysis reveals that diet-dependent midgut plasticity emerges from alterations in both stem cell niche coupling and enterocyte size
Source: eLife. 2021 Sep 23;10:e64125. doi: 10.7554/eLife.64125 (PMC8528489; doi:10.7554/eLife.64125)
Supplement: Figure 5—source data 3. [file elife-64125-fig5-data3.csv]

	GO.ID	Term	Annotated	Significant	Expected	Rank in weight01Fisher	classicFisher	weight01Fisher	Enrichment
1	GO:0044281	small molecule metabolic process	899	267	101.72	1473	< 1e-30	1	HY
2	GO:0055114	oxidation-reduction process	580	200	65.63	1	< 1e-30	4.50E-22	HY
3	GO:0009161	ribonucleoside monophosphate metabolic p...	177	83	20.03	1474	< 1e-30	1	HY
4	GO:0009126	purine nucleoside monophosphate metaboli...	171	81	19.35	1475	< 1e-30	1	HY
5	GO:0009167	purine ribonucleoside monophosphate meta...	171	81	19.35	1476	< 1e-30	1	HY
6	GO:0009123	nucleoside monophosphate metabolic proce...	180	83	20.37	1477	< 1e-30	1	HY
7	GO:0055086	nucleobase-containing small molecule met...	385	126	43.56	1478	2.80E-30	1	HY
8	GO:0019693	ribose phosphate metabolic process	273	102	30.89	1479	5.80E-30	1	HY
68	GO:0006508	proteolysis	942	170	106.59	6	1.20E-10	1.80E-09	HY
10	GO:0009205	purine ribonucleoside triphosphate metab...	161	75	18.22	1481	1.30E-29	1	HY
11	GO:0051186	cofactor metabolic process	262	99	29.65	1482	1.40E-29	1	HY
12	GO:0009144	purine nucleoside triphosphate metabolic...	162	75	18.33	1483	2.20E-29	1	HY
13	GO:0006091	generation of precursor metabolites and ...	212	87	23.99	118	3.80E-29	0.0324	HY
14	GO:0006753	nucleoside phosphate metabolic process	326	112	36.89	1484	4.60E-29	1	HY
91	GO:0015031	protein transport	495	99	56.01	157	6.80E-09	0.06014	HY
16	GO:0009199	ribonucleoside triphosphate metabolic pr...	164	75	18.56	1486	5.90E-29	1	HY
17	GO:0008152	metabolic process	6384	911	722.36	1487	1.30E-28	1	HY
18	GO:0009141	nucleoside triphosphate metabolic proces...	170	76	19.24	1488	1.60E-28	1	HY
97	GO:0015833	peptide transport	508	100	57.48	1542	1.30E-08	1	HY
20	GO:0009150	purine ribonucleotide metabolic process	253	95	28.63	1489	3.70E-28	1	HY
474	GO:0015918	sterol transport	14	5	1.58	460	0.01535	0.21312	HY
22	GO:0019637	organophosphate metabolic process	499	144	56.46	1490	5.20E-28	1	HY
23	GO:0019752	carboxylic acid metabolic process	422	129	47.75	412	9.50E-28	0.12664	HY
24	GO:0072521	purine-containing compound metabolic pro...	285	101	32.25	1491	1.60E-27	1	HY
25	GO:0009259	ribonucleotide metabolic process	262	96	29.65	1492	1.80E-27	1	HY
339	GO:0051180	vitamin transport	7	4	0.79	109	0.00431	0.02217	HY
27	GO:0006163	purine nucleotide metabolic process	260	95	29.42	1493	4.30E-27	1	HY
9	GO:0046034	ATP metabolic process	153	73	17.31	1480	1.10E-29	1	HY
29	GO:0043436	oxoacid metabolic process	431	129	48.77	1494	9.00E-27	1	HY
19	GO:0045333	cellular respiration	129	65	14.6	188	2.60E-28	0.09493	HY
31	GO:0022900	electron transport chain	95	53	10.75	1496	4.10E-26	1	HY
32	GO:0017144	drug metabolic process	422	125	47.75	1497	1.70E-25	1	HY
33	GO:0015980	energy derivation by oxidation of organi...	160	69	18.1	1498	7.40E-25	1	HY
34	GO:1901564	organonitrogen compound metabolic proces...	3661	582	414.25	1499	8.20E-25	1	HY
35	GO:1901135	carbohydrate derivative metabolic proces...	678	168	76.72	1500	2.50E-24	1	HY
21	GO:0006119	oxidative phosphorylation	102	57	11.54	119	4.80E-28	0.03329	HY
37	GO:0032787	monocarboxylic acid metabolic process	185	69	20.93	1502	1.50E-20	1	HY
26	GO:0022904	respiratory electron transport chain	91	53	10.3	451	2.30E-27	0.20721	HY
28	GO:0042773	ATP synthesis coupled electron transport	86	51	9.73	21	6.60E-27	0.00015	HY
36	GO:0042775	mitochondrial ATP synthesis coupled elec...	82	47	9.28	1501	5.40E-24	1	HY
47	GO:0032543	mitochondrial translation	107	44	12.11	2	2.20E-15	2.60E-15	HY
42	GO:0016042	lipid catabolic process	119	49	13.47	38	5.20E-17	0.0012	HY
43	GO:0009056	catabolic process	1049	205	118.7	1505	2.10E-16	1	HY
44	GO:0072329	monocarboxylic acid catabolic process	47	28	5.32	1506	2.00E-15	1	HY
45	GO:0071704	organic substance metabolic process	6039	819	683.33	1507	2.10E-15	1	HY
46	GO:0006790	sulfur compound metabolic process	156	55	17.65	1508	2.20E-15	1	HY
78	GO:0009060	aerobic respiration	67	27	7.58	9	9.90E-10	4.40E-07	HY
48	GO:0044242	cellular lipid catabolic process	74	35	8.37	1509	9.50E-15	1	HY
49	GO:0016054	organic acid catabolic process	99	41	11.2	1510	1.50E-14	1	HY
50	GO:0046395	carboxylic acid catabolic process	99	41	11.2	1511	1.50E-14	1	HY
51	GO:0044283	small molecule biosynthetic process	260	74	29.42	1512	1.80E-14	1	HY
52	GO:0006120	mitochondrial electron transport, NADH t...	38	24	4.3	3	3.20E-14	3.20E-14	HY
121	GO:0006739	NADP metabolic process	12	9	1.36	73	4.70E-07	0.01268	HY
39	GO:0006629	lipid metabolic process	500	127	56.58	97	1.90E-19	0.01431	HY
55	GO:0140053	mitochondrial gene expression	127	46	14.37	1514	1.40E-13	1	HY
56	GO:0016053	organic acid biosynthetic process	151	51	17.09	1515	1.60E-13	1	HY
57	GO:0046394	carboxylic acid biosynthetic process	151	51	17.09	1516	1.60E-13	1	HY
41	GO:0044255	cellular lipid metabolic process	377	101	42.66	414	2.40E-17	0.13075	HY
59	GO:0019395	fatty acid oxidation	34	22	3.85	1517	1.80E-13	1	HY
60	GO:0007005	mitochondrion organization	218	64	24.67	1025	2.30E-13	0.68794	HY
61	GO:0034440	lipid oxidation	35	22	3.96	1518	4.40E-13	1	HY
53	GO:0006631	fatty acid metabolic process	124	46	14.03	404	5.00E-14	0.11334	HY
63	GO:0006732	coenzyme metabolic process	158	51	17.88	1519	1.20E-12	1	HY
64	GO:0051188	cofactor biosynthetic process	113	41	12.79	1520	2.80E-12	1	HY
65	GO:0071702	organic substance transport	770	149	87.13	1521	1.00E-11	1	HY
66	GO:0006749	glutathione metabolic process	51	25	5.77	4	2.40E-11	1.70E-10	HY
67	GO:0071705	nitrogen compound transport	647	129	73.21	1522	3.70E-11	1	HY
54	GO:0009062	fatty acid catabolic process	39	24	4.41	1513	7.50E-14	1	HY
69	GO:0044248	cellular catabolic process	936	169	105.91	1523	1.30E-10	1	HY
70	GO:0006605	protein targeting	136	43	15.39	1524	1.50E-10	1	HY
71	GO:0070972	protein localization to endoplasmic reti...	33	19	3.73	1525	1.60E-10	1	HY
72	GO:0044238	primary metabolic process	5630	746	637.05	1526	1.70E-10	1	HY
73	GO:0045047	protein targeting to ER	24	16	2.72	68	2.00E-10	0.01185	HY
74	GO:0055085	transmembrane transport	643	125	72.76	23	4.20E-10	0.00024	HY
75	GO:0072599	establishment of protein localization to...	25	16	2.83	1527	5.00E-10	1	HY
58	GO:0006635	fatty acid beta-oxidation	31	21	3.51	7	1.70E-13	1.50E-08	HY
77	GO:0006733	oxidoreduction coenzyme metabolic proces...	67	27	7.58	1529	9.90E-10	1	HY
232	GO:0006633	fatty acid biosynthetic process	70	18	7.92	31	0.0006	0.00067	HY
79	GO:0009127	purine nucleoside monophosphate biosynth...	67	27	7.58	1530	9.90E-10	1	HY
80	GO:0009168	purine ribonucleoside monophosphate bios...	67	27	7.58	1531	9.90E-10	1	HY
81	GO:0009156	ribonucleoside monophosphate biosyntheti...	72	28	8.15	1532	1.30E-09	1	HY
82	GO:0006839	mitochondrial transport	105	35	11.88	22	1.60E-09	0.0002	HY
83	GO:1901137	carbohydrate derivative biosynthetic pro...	299	70	33.83	1533	1.60E-09	1	HY
84	GO:0033108	mitochondrial respiratory chain complex ...	44	21	4.98	593	1.80E-09	0.29946	HY
85	GO:0051234	establishment of localization	1850	286	209.33	1534	2.30E-09	1	HY
86	GO:0005996	monosaccharide metabolic process	66	26	7.47	1535	3.60E-09	1	HY
87	GO:0009124	nucleoside monophosphate biosynthetic pr...	75	28	8.49	1536	3.80E-09	1	HY
88	GO:0009108	coenzyme biosynthetic process	94	32	10.64	1537	4.30E-09	1	HY
89	GO:0006613	cotranslational protein targeting to mem...	16	12	1.81	1538	5.00E-09	1	HY
90	GO:0006614	SRP-dependent cotranslational protein ta...	16	12	1.81	17	5.00E-09	4.60E-05	HY
148	GO:0006098	pentose-phosphate shunt	7	6	0.79	458	1.30E-05	0.21285	HY
92	GO:1901607	alpha-amino acid biosynthetic process	39	19	4.41	1539	6.90E-09	1	HY
137	GO:0045454	cell redox homeostasis	49	18	5.54	10	3.00E-06	3.00E-06	HY
94	GO:0008652	cellular amino acid biosynthetic process	43	20	4.87	697	7.60E-09	0.37803	HY
95	GO:0045184	establishment of protein localization	517	102	58.5	1540	8.50E-09	1	HY
96	GO:0042886	amide transport	513	101	58.05	1541	1.10E-08	1	HY
170	GO:0007031	peroxisome organization	22	10	2.49	69	6.00E-05	0.01199	HY
98	GO:0090407	organophosphate biosynthetic process	249	59	28.17	1543	1.90E-08	1	HY
99	GO:0006081	cellular aldehyde metabolic process	30	16	3.39	841	2.00E-08	0.51016	HY
100	GO:0006575	cellular modified amino acid metabolic p...	115	35	13.01	1544	2.30E-08	1	HY
101	GO:0044237	cellular metabolic process	5538	721	626.64	1545	2.80E-08	1	HY
102	GO:1901566	organonitrogen compound biosynthetic pro...	1355	216	153.32	1546	2.90E-08	1	HY
103	GO:0009152	purine ribonucleotide biosynthetic proce...	106	33	11.99	1547	3.10E-08	1	HY
104	GO:0006520	cellular amino acid metabolic process	189	48	21.39	407	4.20E-08	0.11438	HY
62	GO:0006888	ER to Golgi vesicle-mediated transport	67	31	7.58	5	6.80E-13	2.80E-10	HY
106	GO:0017004	cytochrome complex assembly	25	14	2.83	1549	7.00E-08	1	HY
107	GO:0072594	establishment of protein localization to...	182	46	20.59	696	9.40E-08	0.37553	HY
108	GO:0072522	purine-containing compound biosynthetic ...	121	35	13.69	1550	9.50E-08	1	HY
109	GO:0006122	mitochondrial electron transport, ubiqui...	16	11	1.81	8	9.50E-08	9.50E-08	HY
110	GO:0046390	ribose phosphate biosynthetic process	116	34	13.13	1551	1.00E-07	1	HY
111	GO:0006164	purine nucleotide biosynthetic process	111	33	12.56	1552	1.10E-07	1	HY
112	GO:0009145	purine nucleoside triphosphate biosynthe...	58	22	6.56	1553	1.30E-07	1	HY
113	GO:0009206	purine ribonucleoside triphosphate biosy...	58	22	6.56	1554	1.30E-07	1	HY
114	GO:0006754	ATP biosynthetic process	54	21	6.11	1555	1.50E-07	1	HY
115	GO:0009142	nucleoside triphosphate biosynthetic pro...	64	23	7.24	454	2.10E-07	0.21127	HY
116	GO:0046907	intracellular transport	713	125	80.68	1556	2.40E-07	1	HY
117	GO:0019318	hexose metabolic process	56	21	6.34	1557	3.10E-07	1	HY
118	GO:0009201	ribonucleoside triphosphate biosynthetic...	61	22	6.9	1558	3.60E-07	1	HY
119	GO:0008610	lipid biosynthetic process	226	52	25.57	1559	3.60E-07	1	HY
120	GO:1902600	proton transmembrane transport	71	24	8.03	61	4.30E-07	0.00663	HY
132	GO:0048193	Golgi vesicle transport	146	37	16.52	1567	1.50E-06	1	HY
122	GO:0030258	lipid modification	92	28	10.41	1560	5.70E-07	1	HY
123	GO:1901565	organonitrogen compound catabolic proces...	541	99	61.22	592	6.30E-07	0.2948	HY
124	GO:0019362	pyridine nucleotide metabolic process	54	20	6.11	1561	7.40E-07	1	HY
125	GO:0046496	nicotinamide nucleotide metabolic proces...	54	20	6.11	1562	7.40E-07	1	HY
126	GO:0072524	pyridine-containing compound metabolic p...	59	21	6.68	1563	8.50E-07	1	HY
127	GO:0006793	phosphorus metabolic process	1101	175	124.58	1564	9.10E-07	1	HY
128	GO:1901293	nucleoside phosphate biosynthetic proces...	149	38	16.86	1565	9.50E-07	1	HY
129	GO:0006886	intracellular protein transport	402	78	45.49	106	1.00E-06	0.0197	HY
130	GO:0006796	phosphate-containing compound metabolic ...	1082	172	122.43	209	1.10E-06	0.10866	HY
131	GO:1901605	alpha-amino acid metabolic process	128	34	14.48	1566	1.30E-06	1	HY
30	GO:0006082	organic acid metabolic process	433	129	48.99	1495	1.50E-26	1	HY
133	GO:0019682	glyceraldehyde-3-phosphate metabolic pro...	8	7	0.91	1568	1.70E-06	1	HY
134	GO:0072330	monocarboxylic acid biosynthetic process	102	29	11.54	1569	1.70E-06	1	HY
135	GO:0009165	nucleotide biosynthetic process	147	37	16.63	1570	1.80E-06	1	HY
136	GO:0009064	glutamine family amino acid metabolic pr...	31	14	3.51	1571	2.20E-06	1	HY
38	GO:0044282	small molecule catabolic process	147	60	16.63	1503	2.60E-20	1	HY
138	GO:0008535	respiratory chain complex IV assembly	17	10	1.92	121	3.10E-06	0.03517	HY
139	GO:0090150	establishment of protein localization to...	86	25	9.73	1572	5.70E-06	1	HY
140	GO:0016999	antibiotic metabolic process	61	20	6.9	1573	6.60E-06	1	HY
141	GO:0065002	intracellular protein transmembrane tran...	61	20	6.9	1574	6.60E-06	1	HY
142	GO:0071806	protein transmembrane transport	61	20	6.9	1575	6.60E-06	1	HY
143	GO:0034982	mitochondrial protein processing	9	7	1.02	122	6.90E-06	0.03528	HY
144	GO:0051156	glucose 6-phosphate metabolic process	9	7	1.02	457	6.90E-06	0.21273	HY
145	GO:0009084	glutamine family amino acid biosynthetic...	12	8	1.36	1576	8.60E-06	1	HY
146	GO:0046365	monosaccharide catabolic process	12	8	1.36	1577	8.60E-06	1	HY
147	GO:0009066	aspartate family amino acid metabolic pr...	30	13	3.39	1578	8.80E-06	1	HY
40	GO:1901575	organic substance catabolic process	878	184	99.35	1504	6.40E-18	1	HY
149	GO:0033540	fatty acid beta-oxidation using acyl-CoA...	7	6	0.79	11	1.30E-05	1.30E-05	HY
150	GO:0033365	protein localization to organelle	254	52	28.74	1579	1.40E-05	1	HY
151	GO:0016052	carbohydrate catabolic process	59	19	6.68	211	1.50E-05	0.11219	HY
152	GO:0051649	establishment of localization in cell	833	133	94.26	1580	1.70E-05	1	HY
153	GO:0006811	ion transport	533	92	60.31	1581	1.90E-05	1	HY
154	GO:0006012	galactose metabolic process	10	7	1.13	214	2.10E-05	0.11273	HY
155	GO:0048284	organelle fusion	82	23	9.28	1582	2.50E-05	1	HY
156	GO:0006626	protein targeting to mitochondrion	56	18	6.34	666	2.60E-05	0.31153	HY
157	GO:0070585	protein localization to mitochondrion	62	19	7.02	1583	3.30E-05	1	HY
158	GO:0072655	establishment of protein localization to...	62	19	7.02	1584	3.30E-05	1	HY
159	GO:0006807	nitrogen compound metabolic process	5426	683	613.96	116	3.60E-05	0.02949	HY
160	GO:0019725	cellular homeostasis	256	51	28.97	1585	3.60E-05	1	HY
161	GO:0016226	iron-sulfur cluster assembly	21	10	2.38	42	3.60E-05	0.00161	HY
162	GO:0031163	metallo-sulfur cluster assembly	21	10	2.38	1586	3.60E-05	1	HY
163	GO:0010499	proteasomal ubiquitin-independent protei...	25	11	2.83	15	3.70E-05	3.70E-05	HY
164	GO:0046916	cellular transition metal ion homeostasi...	25	11	2.83	1587	3.70E-05	1	HY
165	GO:0033617	mitochondrial respiratory chain complex ...	14	8	1.58	16	4.20E-05	4.20E-05	HY
166	GO:0006612	protein targeting to membrane	48	16	5.43	994	4.40E-05	0.64705	HY
167	GO:0098754	detoxification	34	13	3.85	1588	4.40E-05	1	HY
168	GO:0048878	chemical homeostasis	279	54	31.57	1589	4.90E-05	1	HY
169	GO:0019320	hexose catabolic process	11	7	1.24	1590	5.10E-05	1	HY
15	GO:0009117	nucleotide metabolic process	322	111	36.43	1485	5.90E-29	1	HY
171	GO:0098662	inorganic cation transmembrane transport	189	40	21.39	1591	6.20E-05	1	HY
172	GO:0046434	organophosphate catabolic process	70	20	7.92	1592	6.30E-05	1	HY
173	GO:0010257	NADH dehydrogenase complex assembly	15	8	1.7	1593	8.10E-05	1	HY
174	GO:0032981	mitochondrial respiratory chain complex ...	15	8	1.7	18	8.10E-05	8.10E-05	HY
175	GO:0055076	transition metal ion homeostasis	46	15	5.2	1594	0.0001	1	HY
176	GO:0006627	protein processing involved in protein t...	6	5	0.68	19	0.0001	0.0001	HY
177	GO:0048199	vesicle targeting, to, from or within Go...	6	5	0.68	1595	0.0001	1	HY
178	GO:0048280	vesicle fusion with Golgi apparatus	6	5	0.68	20	0.0001	0.0001	HY
179	GO:0010821	regulation of mitochondrion organization	32	12	3.62	843	0.00011	0.51133	HY
180	GO:0070071	proton-transporting two-sector ATPase co...	12	7	1.36	1596	0.00011	1	HY
181	GO:0043603	cellular amide metabolic process	1037	155	117.34	1597	0.00012	1	HY
182	GO:0019388	galactose catabolic process	9	6	1.02	215	0.00013	0.11281	HY
183	GO:0015985	energy coupled proton transport, down el...	24	10	2.72	1598	0.00015	1	HY
184	GO:0015986	ATP synthesis coupled proton transport	24	10	2.72	59	0.00015	0.00602	HY
185	GO:0046148	pigment biosynthetic process	64	18	7.24	1599	0.00018	1	HY
186	GO:0016050	vesicle organization	110	26	12.45	1600	0.00019	1	HY
187	GO:0009135	purine nucleoside diphosphate metabolic ...	29	11	3.28	1601	0.00019	1	HY
188	GO:0009179	purine ribonucleoside diphosphate metabo...	29	11	3.28	1602	0.00019	1	HY
189	GO:0009185	ribonucleoside diphosphate metabolic pro...	29	11	3.28	1603	0.00019	1	HY
190	GO:0046031	ADP metabolic process	29	11	3.28	1604	0.00019	1	HY
191	GO:1990542	mitochondrial transmembrane transport	70	19	7.92	1605	0.0002	1	HY
192	GO:0009132	nucleoside diphosphate metabolic process	34	12	3.85	1606	0.00021	1	HY
193	GO:0006743	ubiquinone metabolic process	13	7	1.47	1607	0.00022	1	HY
194	GO:0006744	ubiquinone biosynthetic process	13	7	1.47	35	0.00022	0.00104	HY
195	GO:0006779	porphyrin-containing compound biosynthet...	13	7	1.47	1608	0.00022	1	HY
196	GO:0006783	heme biosynthetic process	13	7	1.47	36	0.00022	0.00104	HY
197	GO:0033014	tetrapyrrole biosynthetic process	13	7	1.47	1609	0.00022	1	HY
198	GO:0045324	late endosome to vacuole transport	13	7	1.47	416	0.00022	0.14026	HY
199	GO:1901661	quinone metabolic process	13	7	1.47	1610	0.00022	1	HY
200	GO:1901663	quinone biosynthetic process	13	7	1.47	1611	0.00022	1	HY
201	GO:0006643	membrane lipid metabolic process	105	25	11.88	1612	0.00022	1	HY
202	GO:0042592	homeostatic process	517	85	58.5	453	0.00022	0.2095	HY
203	GO:0006487	protein N-linked glycosylation	39	13	4.41	47	0.00023	0.00361	HY
204	GO:1901292	nucleoside phosphate catabolic process	44	14	4.98	1613	0.00023	1	HY
205	GO:0006123	mitochondrial electron transport, cytoch...	17	8	1.92	24	0.00025	0.00025	HY
206	GO:0019646	aerobic electron transport chain	17	8	1.92	1614	0.00025	1	HY
207	GO:1990748	cellular detoxification	10	6	1.13	1615	0.00029	1	HY
208	GO:0006090	pyruvate metabolic process	45	14	5.09	159	0.0003	0.06373	HY
209	GO:0006465	signal peptide processing	7	5	0.79	25	0.00032	0.00032	HY
210	GO:0006616	SRP-dependent cotranslational protein ta...	7	5	0.79	26	0.00032	0.00032	HY
211	GO:0006878	cellular copper ion homeostasis	7	5	0.79	27	0.00032	0.00032	HY
212	GO:0032511	late endosome to vacuole transport via m...	7	5	0.79	124	0.00032	0.03536	HY
213	GO:0060628	regulation of ER to Golgi vesicle-mediat...	7	5	0.79	125	0.00032	0.03536	HY
214	GO:0009100	glycoprotein metabolic process	145	31	16.41	1616	0.00033	1	HY
215	GO:0007034	vacuolar transport	56	16	6.34	564	0.00034	0.22454	HY
216	GO:0051604	protein maturation	96	23	10.86	1617	0.00035	1	HY
217	GO:0098655	cation transmembrane transport	211	41	23.88	1618	0.00035	1	HY
218	GO:0098660	inorganic ion transmembrane transport	211	41	23.88	1619	0.00035	1	HY
219	GO:0000096	sulfur amino acid metabolic process	22	9	2.49	213	0.00037	0.11268	HY
220	GO:0006778	porphyrin-containing compound metabolic ...	14	7	1.58	1620	0.00039	1	HY
221	GO:0009067	aspartate family amino acid biosynthetic...	14	7	1.58	1621	0.00039	1	HY
222	GO:0042168	heme metabolic process	14	7	1.58	1622	0.00039	1	HY
223	GO:0072593	reactive oxygen species metabolic proces...	36	12	4.07	72	0.00039	0.01268	HY
224	GO:0006006	glucose metabolic process	41	13	4.64	30	0.00039	0.00065	HY
225	GO:0055070	copper ion homeostasis	18	8	2.04	408	0.00041	0.11862	HY
226	GO:0006457	protein folding	123	27	13.92	112	0.0005	0.02282	HY
227	GO:0008340	determination of adult lifespan	168	34	19.01	28	0.00051	0.00051	HY
228	GO:0009166	nucleotide catabolic process	42	13	4.75	790	0.00051	0.44944	HY
229	GO:0009112	nucleobase metabolic process	23	9	2.6	1623	0.00055	1	HY
230	GO:0009063	cellular amino acid catabolic process	53	15	6	1624	0.00057	1	HY
231	GO:0033036	macromolecule localization	947	139	107.16	1625	0.00058	1	HY
105	GO:0009260	ribonucleotide biosynthetic process	114	34	12.9	1548	6.30E-08	1	HY
233	GO:0006891	intra-Golgi vesicle-mediated transport	28	10	3.17	29	0.00064	0.00064	HY
234	GO:0017001	antibiotic catabolic process	15	7	1.7	1626	0.00066	1	HY
235	GO:0007568	aging	177	35	20.03	1627	0.00066	1	HY
236	GO:0043648	dicarboxylic acid metabolic process	38	12	4.3	1628	0.00068	1	HY
237	GO:0010259	multicellular organism aging	171	34	19.35	1629	0.00071	1	HY
238	GO:0006901	vesicle coating	5	4	0.57	1630	0.00074	1	HY
239	GO:0016559	peroxisome fission	5	4	0.57	32	0.00074	0.00074	HY
240	GO:0032469	endoplasmic reticulum calcium ion homeos...	5	4	0.57	33	0.00074	0.00074	HY
241	GO:0048209	regulation of vesicle targeting, to, fro...	5	4	0.57	216	0.00074	0.11294	HY
242	GO:0033499	galactose catabolic process via UDP-gala...	8	5	0.91	34	0.00077	0.00077	HY
243	GO:0034220	ion transmembrane transport	303	53	34.29	1631	0.00079	1	HY
244	GO:0016485	protein processing	66	17	7.47	1224	0.00083	0.87751	HY
245	GO:0006979	response to oxidative stress	140	29	15.84	187	0.00087	0.08909	HY
246	GO:0090174	organelle membrane fusion	61	16	6.9	1632	0.00095	1	HY
247	GO:0016192	vesicle-mediated transport	519	82	58.73	772	0.00099	0.40518	HY
248	GO:0042180	cellular ketone metabolic process	67	17	7.58	1633	0.001	1	HY
249	GO:0000097	sulfur amino acid biosynthetic process	12	6	1.36	1634	0.00105	1	HY
250	GO:0006144	purine nucleobase metabolic process	12	6	1.36	1635	0.00105	1	HY
251	GO:0008053	mitochondrial fusion	16	7	1.81	108	0.00106	0.02208	HY
252	GO:0033013	tetrapyrrole metabolic process	16	7	1.81	1636	0.00106	1	HY
253	GO:0072657	protein localization to membrane	155	31	17.54	1195	0.00108	0.85054	HY
254	GO:0007007	inner mitochondrial membrane organizatio...	25	9	2.83	844	0.00112	0.51194	HY
255	GO:0032509	endosome transport via multivesicular bo...	25	9	2.83	445	0.00112	0.20396	HY
256	GO:0071985	multivesicular body sorting pathway	25	9	2.83	1637	0.00112	1	HY
257	GO:0044743	protein transmembrane import into intrac...	51	14	5.77	1638	0.0012	1	HY
258	GO:0002181	cytoplasmic translation	130	27	14.71	50	0.00123	0.00444	HY
259	GO:0034613	cellular protein localization	599	92	67.78	1363	0.00125	0.97389	HY
260	GO:0006812	cation transport	338	57	38.25	1194	0.00126	0.84926	HY
261	GO:0006820	anion transport	204	38	23.08	12	0.0013	1.30E-05	HY
262	GO:0034404	nucleobase-containing small molecule bio...	63	16	7.13	1639	0.00138	1	HY
263	GO:0072350	tricarboxylic acid metabolic process	41	12	4.64	1640	0.00144	1	HY
264	GO:0006002	fructose 6-phosphate metabolic process	3	3	0.34	39	0.00145	0.00145	HY
265	GO:0006561	proline biosynthetic process	3	3	0.34	220	0.00145	0.113	HY
266	GO:0009052	pentose-phosphate shunt, non-oxidative b...	3	3	0.34	40	0.00145	0.00145	HY
267	GO:0016094	polyprenol biosynthetic process	3	3	0.34	221	0.00145	0.113	HY
268	GO:0033615	mitochondrial proton-transporting ATP sy...	3	3	0.34	41	0.00145	0.00145	HY
269	GO:0008104	protein localization	765	113	86.56	1355	0.00152	0.97237	HY
270	GO:0006486	protein glycosylation	100	22	11.32	415	0.00156	0.13582	HY
271	GO:0043413	macromolecule glycosylation	100	22	11.32	1641	0.00156	1	HY
272	GO:0051179	localization	2370	310	268.17	1642	0.00158	1	HY
273	GO:0006165	nucleoside diphosphate phosphorylation	31	10	3.51	698	0.00158	0.38006	HY
274	GO:0007029	endoplasmic reticulum organization	31	10	3.51	67	0.00158	0.01148	HY
275	GO:0006906	vesicle fusion	58	15	6.56	51	0.00158	0.00466	HY
276	GO:0006767	water-soluble vitamin metabolic process	13	6	1.47	1643	0.00176	1	HY
277	GO:0046364	monosaccharide biosynthetic process	13	6	1.47	1644	0.00176	1	HY
278	GO:0070085	glycosylation	101	22	11.43	1645	0.00178	1	HY
279	GO:0030163	protein catabolic process	380	62	43	842	0.00182	0.51095	HY
280	GO:0061025	membrane fusion	65	16	7.35	1646	0.00196	1	HY
281	GO:0000041	transition metal ion transport	37	11	4.19	1647	0.00196	1	HY
282	GO:0002814	negative regulation of biosynthetic proc...	6	4	0.68	43	0.00203	0.00203	HY
283	GO:0006620	posttranslational protein targeting to e...	6	4	0.68	461	0.00203	0.21313	HY
284	GO:0019509	L-methionine salvage from methylthioaden...	6	4	0.68	44	0.00203	0.00203	HY
285	GO:0033238	regulation of cellular amine metabolic p...	6	4	0.68	1648	0.00203	1	HY
286	GO:0043102	amino acid salvage	6	4	0.68	1649	0.00203	1	HY
287	GO:0071265	L-methionine biosynthetic process	6	4	0.68	1650	0.00203	1	HY
288	GO:0071267	L-methionine salvage	6	4	0.68	1651	0.00203	1	HY
289	GO:0046939	nucleotide phosphorylation	32	10	3.62	1652	0.00206	1	HY
290	GO:0006096	glycolytic process	27	9	3.06	60	0.00208	0.00631	HY
291	GO:0006757	ATP generation from ADP	27	9	3.06	1653	0.00208	1	HY
292	GO:0009308	amine metabolic process	27	9	3.06	1654	0.00208	1	HY
293	GO:0042866	pyruvate biosynthetic process	27	9	3.06	1655	0.00208	1	HY
294	GO:0044106	cellular amine metabolic process	27	9	3.06	1656	0.00208	1	HY
295	GO:0010038	response to metal ion	54	14	6.11	180	0.00218	0.07126	HY
296	GO:0061024	membrane organization	239	42	27.04	1029	0.00241	0.69832	HY
297	GO:0006517	protein deglycosylation	18	7	2.04	66	0.00241	0.0085	HY
298	GO:1901606	alpha-amino acid catabolic process	49	13	5.54	1657	0.00248	1	HY
299	GO:0010035	response to inorganic substance	91	20	10.3	1658	0.00252	1	HY
300	GO:0046467	membrane lipid biosynthetic process	85	19	9.62	212	0.00261	0.11243	HY
301	GO:0010876	lipid localization	117	24	13.24	1659	0.00266	1	HY
302	GO:0010822	positive regulation of mitochondrion org...	14	6	1.58	1660	0.00279	1	HY
303	GO:0043094	cellular metabolic compound salvage	14	6	1.58	1661	0.00279	1	HY
304	GO:0006490	oligosaccharide-lipid intermediate biosy...	10	5	1.13	126	0.00284	0.03538	HY
305	GO:0006879	cellular iron ion homeostasis	10	5	1.13	48	0.00284	0.0043	HY
306	GO:0009070	serine family amino acid biosynthetic pr...	10	5	1.13	1662	0.00284	1	HY
307	GO:0009086	methionine biosynthetic process	10	5	1.13	699	0.00284	0.38068	HY
308	GO:0046033	AMP metabolic process	10	5	1.13	1663	0.00284	1	HY
309	GO:0048194	Golgi vesicle budding	10	5	1.13	1664	0.00284	1	HY
310	GO:0009987	cellular process	7970	947	901.82	1665	0.00287	1	HY
311	GO:1905952	regulation of lipid localization	50	13	5.66	1666	0.00301	1	HY
312	GO:0051641	cellular localization	1060	148	119.94	1667	0.00314	1	HY
313	GO:0009306	protein secretion	93	20	10.52	45	0.0033	0.00297	HY
314	GO:0044272	sulfur compound biosynthetic process	34	10	3.85	1668	0.0034	1	HY
315	GO:0097164	ammonium ion metabolic process	45	12	5.09	1669	0.00343	1	HY
316	GO:0008299	isoprenoid biosynthetic process	19	7	2.15	1670	0.00344	1	HY
317	GO:1901264	carbohydrate derivative transport	19	7	2.15	1671	0.00344	1	HY
318	GO:0006665	sphingolipid metabolic process	63	15	7.13	565	0.00377	0.225	HY
319	GO:0007006	mitochondrial membrane organization	40	11	4.53	1672	0.00386	1	HY
320	GO:0072525	pyridine-containing compound biosyntheti...	40	11	4.53	1673	0.00386	1	HY
321	GO:0055065	metal ion homeostasis	127	25	14.37	667	0.00391	0.31186	HY
322	GO:0009101	glycoprotein biosynthetic process	114	23	12.9	1674	0.00401	1	HY
323	GO:0070727	cellular macromolecule localization	662	97	74.91	1675	0.0041	1	HY
324	GO:0051181	cofactor transport	15	6	1.7	1676	0.00421	1	HY
325	GO:0055088	lipid homeostasis	76	17	8.6	102	0.00425	0.01891	HY
326	GO:0019359	nicotinamide nucleotide biosynthetic pro...	35	10	3.96	1677	0.00429	1	HY
327	GO:0019363	pyridine nucleotide biosynthetic process	35	10	3.96	1678	0.00429	1	HY
328	GO:0000303	response to superoxide	7	4	0.79	1679	0.00431	1	HY
329	GO:0000305	response to oxygen radical	7	4	0.79	1680	0.00431	1	HY
330	GO:0002787	negative regulation of antibacterial pep...	7	4	0.79	1681	0.00431	1	HY
331	GO:0002806	negative regulation of antimicrobial pep...	7	4	0.79	1682	0.00431	1	HY
332	GO:0002809	negative regulation of antibacterial pep...	7	4	0.79	1683	0.00431	1	HY
333	GO:0006525	arginine metabolic process	7	4	0.79	462	0.00431	0.21315	HY
334	GO:0009113	purine nucleobase biosynthetic process	7	4	0.79	70	0.00431	0.0121	HY
335	GO:0019430	removal of superoxide radicals	7	4	0.79	49	0.00431	0.00431	HY
336	GO:0032222	regulation of synaptic transmission, cho...	7	4	0.79	700	0.00431	0.38084	HY
337	GO:0042364	water-soluble vitamin biosynthetic proce...	7	4	0.79	1684	0.00431	1	HY
338	GO:0051055	negative regulation of lipid biosyntheti...	7	4	0.79	1685	0.00431	1	HY
93	GO:0005975	carbohydrate metabolic process	261	62	29.53	14	7.60E-09	2.50E-05	HY
340	GO:0071450	cellular response to oxygen radical	7	4	0.79	1686	0.00431	1	HY
341	GO:0071451	cellular response to superoxide	7	4	0.79	1687	0.00431	1	HY
342	GO:0051603	proteolysis involved in cellular protein...	350	56	39.6	163	0.00453	0.06483	HY
343	GO:0042133	neurotransmitter metabolic process	30	9	3.39	1688	0.00465	1	HY
344	GO:0030149	sphingolipid catabolic process	11	5	1.24	74	0.00473	0.01276	HY
345	GO:0046466	membrane lipid catabolic process	11	5	1.24	1689	0.00473	1	HY
346	GO:0043161	proteasome-mediated ubiquitin-dependent ...	234	40	26.48	13	0.00494	2.30E-05	HY
347	GO:0010498	proteasomal protein catabolic process	249	42	28.17	1690	0.00515	1	HY
348	GO:0003400	regulation of COPII vesicle coating	4	3	0.45	52	0.00529	0.00529	HY
349	GO:0015988	energy coupled proton transmembrane tran...	4	3	0.45	1691	0.00529	1	HY
350	GO:0015990	electron transport coupled proton transp...	4	3	0.45	53	0.00529	0.00529	HY
351	GO:0031204	posttranslational protein targeting to m...	4	3	0.45	54	0.00529	0.00529	HY
352	GO:0034975	protein folding in endoplasmic reticulum	4	3	0.45	55	0.00529	0.00529	HY
353	GO:0042069	regulation of catecholamine metabolic pr...	4	3	0.45	223	0.00529	0.11301	HY
354	GO:0043328	protein transport to vacuole involved in...	4	3	0.45	56	0.00529	0.00529	HY
355	GO:0043461	proton-transporting ATP synthase complex...	4	3	0.45	1692	0.00529	1	HY
356	GO:0046185	aldehyde catabolic process	4	3	0.45	1693	0.00529	1	HY
357	GO:0048207	vesicle targeting, rough ER to cis-Golgi	4	3	0.45	1694	0.00529	1	HY
358	GO:0048208	COPII vesicle coating	4	3	0.45	1695	0.00529	1	HY
359	GO:0048677	axon extension involved in regeneration	4	3	0.45	1696	0.00529	1	HY
360	GO:0048686	regulation of sprouting of injured axon	4	3	0.45	1697	0.00529	1	HY
361	GO:0048687	positive regulation of sprouting of inju...	4	3	0.45	1698	0.00529	1	HY
362	GO:0048690	regulation of axon extension involved in...	4	3	0.45	1699	0.00529	1	HY
363	GO:0048691	positive regulation of axon extension in...	4	3	0.45	57	0.00529	0.00529	HY
364	GO:0071569	protein ufmylation	4	3	0.45	224	0.00529	0.11301	HY
365	GO:0090113	regulation of ER to Golgi vesicle-mediat...	4	3	0.45	1700	0.00529	1	HY
366	GO:1905806	regulation of synapse pruning	4	3	0.45	1701	0.00529	1	HY
367	GO:1905808	positive regulation of synapse pruning	4	3	0.45	58	0.00529	0.00529	HY
368	GO:0044257	cellular protein catabolic process	354	56	40.06	1702	0.00576	1	HY
369	GO:0000302	response to reactive oxygen species	42	11	4.75	779	0.00579	0.43972	HY
370	GO:0006555	methionine metabolic process	16	6	1.81	1703	0.00609	1	HY
371	GO:0006766	vitamin metabolic process	16	6	1.81	1704	0.00609	1	HY
372	GO:0043248	proteasome assembly	16	6	1.81	765	0.00609	0.39962	HY
373	GO:0046112	nucleobase biosynthetic process	16	6	1.81	1705	0.00609	1	HY
374	GO:0006720	isoprenoid metabolic process	26	8	2.94	1706	0.00633	1	HY
375	GO:0010507	negative regulation of autophagy	26	8	2.94	37	0.00633	0.00106	HY
376	GO:0046890	regulation of lipid biosynthetic process	26	8	2.94	459	0.00633	0.21287	HY
377	GO:0006066	alcohol metabolic process	79	17	8.94	456	0.00641	0.21242	HY
378	GO:0010883	regulation of lipid storage	43	11	4.87	98	0.00701	0.01522	HY
379	GO:0070482	response to oxygen levels	80	17	9.05	1707	0.00731	1	HY
380	GO:0033559	unsaturated fatty acid metabolic process	12	5	1.36	1708	0.00736	1	HY
381	GO:0098771	inorganic ion homeostasis	154	28	17.43	1709	0.00743	1	HY
382	GO:0006560	proline metabolic process	8	4	0.91	1710	0.00785	1	HY
383	GO:0019321	pentose metabolic process	8	4	0.91	1711	0.00785	1	HY
384	GO:0042135	neurotransmitter catabolic process	8	4	0.91	1712	0.00785	1	HY
385	GO:0042776	mitochondrial ATP synthesis coupled prot...	8	4	0.91	62	0.00785	0.00785	HY
386	GO:0045039	protein import into mitochondrial inner ...	8	4	0.91	63	0.00785	0.00785	HY
387	GO:0046113	nucleobase catabolic process	8	4	0.91	1713	0.00785	1	HY
388	GO:0070070	proton-transporting V-type ATPase comple...	8	4	0.91	1714	0.00785	1	HY
389	GO:0070072	vacuolar proton-transporting V-type ATPa...	8	4	0.91	64	0.00785	0.00785	HY
390	GO:0090114	COPII-coated vesicle budding	8	4	0.91	218	0.00785	0.11297	HY
391	GO:0098869	cellular oxidant detoxification	8	4	0.91	1715	0.00785	1	HY
392	GO:1903580	positive regulation of ATP metabolic pro...	8	4	0.91	1716	0.00785	1	HY
393	GO:0006099	tricarboxylic acid cycle	38	10	4.3	65	0.00806	0.00806	HY
394	GO:0055080	cation homeostasis	155	28	17.54	1717	0.00812	1	HY
395	GO:0001666	response to hypoxia	62	14	7.02	155	0.00827	0.05348	HY
396	GO:0006875	cellular metal ion homeostasis	94	19	10.64	1718	0.00827	1	HY
397	GO:0034599	cellular response to oxidative stress	44	11	4.98	156	0.00841	0.05496	HY
398	GO:0019915	lipid storage	56	13	6.34	1028	0.00845	0.69725	HY
399	GO:0006903	vesicle targeting	17	6	1.92	1719	0.00853	1	HY
400	GO:0009069	serine family amino acid metabolic proce...	22	7	2.49	1720	0.0086	1	HY
401	GO:0051187	cofactor catabolic process	22	7	2.49	1721	0.0086	1	HY
402	GO:0006518	peptide metabolic process	952	131	107.72	1100	0.0087	0.7565	HY
403	GO:0016197	endosomal transport	102	20	11.54	576	0.00964	0.25565	HY
404	GO:0006101	citrate metabolic process	39	10	4.41	1722	0.00977	1	HY
405	GO:1901136	carbohydrate derivative catabolic proces...	70	15	7.92	1723	0.01049	1	HY
406	GO:0002790	peptide secretion	103	20	11.65	1724	0.01073	1	HY
407	GO:0042743	hydrogen peroxide metabolic process	13	5	1.47	1725	0.01086	1	HY
408	GO:0006644	phospholipid metabolic process	152	27	17.2	680	0.01148	0.32966	HY
409	GO:0055082	cellular chemical homeostasis	138	25	15.61	1726	0.0115	1	HY
410	GO:0006672	ceramide metabolic process	18	6	2.04	1727	0.01159	1	HY
411	GO:0033865	nucleoside bisphosphate metabolic proces...	52	12	5.88	1728	0.01172	1	HY
412	GO:0033875	ribonucleoside bisphosphate metabolic pr...	52	12	5.88	1729	0.01172	1	HY
413	GO:0034032	purine nucleoside bisphosphate metabolic...	52	12	5.88	1730	0.01172	1	HY
414	GO:0006167	AMP biosynthetic process	5	3	0.57	466	0.01212	0.21326	HY
415	GO:0016093	polyprenol metabolic process	5	3	0.57	1731	0.01212	1	HY
416	GO:0072337	modified amino acid transport	5	3	0.57	1732	0.01212	1	HY
417	GO:0098883	synapse pruning	5	3	0.57	1733	0.01212	1	HY
418	GO:0006046	N-acetylglucosamine catabolic process	2	2	0.23	75	0.01279	0.01279	HY
419	GO:0006107	oxaloacetate metabolic process	2	2	0.23	76	0.01279	0.01279	HY
420	GO:0006172	ADP biosynthetic process	2	2	0.23	77	0.01279	0.01279	HY
421	GO:0006210	thymine catabolic process	2	2	0.23	78	0.01279	0.01279	HY
422	GO:0006526	arginine biosynthetic process	2	2	0.23	230	0.01279	0.11308	HY
423	GO:0006531	aspartate metabolic process	2	2	0.23	1734	0.01279	1	HY
424	GO:0006574	valine catabolic process	2	2	0.23	79	0.01279	0.01279	HY
425	GO:0009051	pentose-phosphate shunt, oxidative branc...	2	2	0.23	80	0.01279	0.01279	HY
426	GO:0009136	purine nucleoside diphosphate biosynthet...	2	2	0.23	1735	0.01279	1	HY
427	GO:0009180	purine ribonucleoside diphosphate biosyn...	2	2	0.23	1736	0.01279	1	HY
428	GO:0009188	ribonucleoside diphosphate biosynthetic ...	2	2	0.23	1737	0.01279	1	HY
429	GO:0009438	methylglyoxal metabolic process	2	2	0.23	1738	0.01279	1	HY
430	GO:0009450	gamma-aminobutyric acid catabolic proces...	2	2	0.23	81	0.01279	0.01279	HY
431	GO:0010387	COP9 signalosome assembly	2	2	0.23	82	0.01279	0.01279	HY
432	GO:0015838	amino-acid betaine transport	2	2	0.23	1739	0.01279	1	HY
433	GO:0015879	carnitine transport	2	2	0.23	83	0.01279	0.01279	HY
434	GO:0018343	protein farnesylation	2	2	0.23	84	0.01279	0.01279	HY
435	GO:0019408	dolichol biosynthetic process	2	2	0.23	85	0.01279	0.01279	HY
436	GO:0019852	L-ascorbic acid metabolic process	2	2	0.23	1740	0.01279	1	HY
437	GO:0019853	L-ascorbic acid biosynthetic process	2	2	0.23	86	0.01279	0.01279	HY
438	GO:0019859	thymine metabolic process	2	2	0.23	1741	0.01279	1	HY
439	GO:0032074	negative regulation of nuclease activity	2	2	0.23	1742	0.01279	1	HY
440	GO:0032224	positive regulation of synaptic transmis...	2	2	0.23	87	0.01279	0.01279	HY
441	GO:0032373	positive regulation of sterol transport	2	2	0.23	1743	0.01279	1	HY
442	GO:0032376	positive regulation of cholesterol trans...	2	2	0.23	1744	0.01279	1	HY
443	GO:0032377	regulation of intracellular lipid transp...	2	2	0.23	1745	0.01279	1	HY
444	GO:0032379	positive regulation of intracellular lip...	2	2	0.23	1746	0.01279	1	HY
445	GO:0032380	regulation of intracellular sterol trans...	2	2	0.23	1747	0.01279	1	HY
446	GO:0032382	positive regulation of intracellular ste...	2	2	0.23	1748	0.01279	1	HY
447	GO:0032383	regulation of intracellular cholesterol ...	2	2	0.23	1749	0.01279	1	HY
448	GO:0032385	positive regulation of intracellular cho...	2	2	0.23	88	0.01279	0.01279	HY
449	GO:0045056	transcytosis	2	2	0.23	89	0.01279	0.01279	HY
450	GO:0046292	formaldehyde metabolic process	2	2	0.23	1750	0.01279	1	HY
451	GO:0046294	formaldehyde catabolic process	2	2	0.23	90	0.01279	0.01279	HY
452	GO:0046416	D-amino acid metabolic process	2	2	0.23	91	0.01279	0.01279	HY
453	GO:0046519	sphingoid metabolic process	2	2	0.23	1751	0.01279	1	HY
454	GO:0055129	L-proline biosynthetic process	2	2	0.23	92	0.01279	0.01279	HY
455	GO:0060701	negative regulation of ribonuclease acti...	2	2	0.23	1752	0.01279	1	HY
456	GO:0060702	negative regulation of endoribonuclease ...	2	2	0.23	93	0.01279	0.01279	HY
457	GO:0090364	regulation of proteasome assembly	2	2	0.23	94	0.01279	0.01279	HY
458	GO:0110095	cellular detoxification of aldehyde	2	2	0.23	1753	0.01279	1	HY
459	GO:0110096	cellular response to aldehyde	2	2	0.23	1754	0.01279	1	HY
460	GO:1900101	regulation of endoplasmic reticulum unfo...	2	2	0.23	1755	0.01279	1	HY
461	GO:1903850	regulation of cristae formation	2	2	0.23	231	0.01279	0.11308	HY
462	GO:2000425	regulation of apoptotic cell clearance	2	2	0.23	1756	0.01279	1	HY
463	GO:2000427	positive regulation of apoptotic cell cl...	2	2	0.23	95	0.01279	0.01279	HY
464	GO:2001171	positive regulation of ATP biosynthetic ...	2	2	0.23	96	0.01279	0.01279	HY
465	GO:0006825	copper ion transport	9	4	1.02	190	0.01287	0.1012	HY
466	GO:0009068	aspartate family amino acid catabolic pr...	9	4	1.02	1757	0.01287	1	HY
467	GO:0009110	vitamin biosynthetic process	9	4	1.02	1758	0.01287	1	HY
468	GO:0090151	establishment of protein localization to...	9	4	1.02	1759	0.01287	1	HY
469	GO:0015672	monovalent inorganic cation transport	175	30	19.8	455	0.0131	0.21209	HY
470	GO:0019538	protein metabolic process	2911	363	329.39	1760	0.01349	1	HY
471	GO:0016310	phosphorylation	620	88	70.15	120	0.01378	0.0345	HY
472	GO:0043632	modification-dependent macromolecule cat...	326	50	36.89	1761	0.01532	1	HY
473	GO:0046164	alcohol catabolic process	19	6	2.15	1762	0.01535	1	HY
76	GO:0006810	transport	1787	281	202.2	1528	5.40E-10	1	HY
475	GO:0045833	negative regulation of lipid metabolic p...	14	5	1.58	1763	0.01535	1	HY
476	GO:0065003	protein-containing complex assembly	607	86	68.68	840	0.01543	0.50861	HY
477	GO:0050801	ion homeostasis	163	28	18.44	1764	0.01572	1	HY
478	GO:0070050	neuron cellular homeostasis	30	8	3.39	101	0.01578	0.01791	HY
479	GO:0019941	modification-dependent protein catabolic...	319	49	36.1	160	0.01584	0.06465	HY
480	GO:0036293	response to decreased oxygen levels	67	14	7.58	1765	0.01633	1	HY
481	GO:0030003	cellular cation homeostasis	121	22	13.69	1766	0.01635	1	HY
482	GO:0007030	Golgi organization	74	15	8.37	100	0.01729	0.01729	HY
483	GO:0009057	macromolecule catabolic process	563	80	63.7	1767	0.01781	1	HY
484	GO:0060260	regulation of transcription initiation f...	25	7	2.83	1768	0.01794	1	HY
485	GO:0097237	cellular response to toxic substance	25	7	2.83	1769	0.01794	1	HY
486	GO:2000142	regulation of DNA-templated transcriptio...	25	7	2.83	1770	0.01794	1	HY
487	GO:0034976	response to endoplasmic reticulum stress	81	16	9.17	424	0.01805	0.1449	HY
488	GO:0006873	cellular ion homeostasis	123	22	13.92	1771	0.01953	1	HY
489	GO:0006013	mannose metabolic process	10	4	1.13	104	0.01956	0.01956	HY
490	GO:0010635	regulation of mitochondrial fusion	10	4	1.13	1772	0.01956	1	HY
491	GO:0042744	hydrogen peroxide catabolic process	10	4	1.13	105	0.01956	0.01956	HY
492	GO:0045898	regulation of RNA polymerase II transcri...	10	4	1.13	464	0.01956	0.2132	HY
493	GO:1900544	positive regulation of purine nucleotide...	10	4	1.13	1773	0.01956	1	HY
494	GO:0034620	cellular response to unfolded protein	37	9	4.19	579	0.01962	0.26724	HY
495	GO:0042181	ketone biosynthetic process	37	9	4.19	1774	0.01962	1	HY
496	GO:0034614	cellular response to reactive oxygen spe...	20	6	2.26	780	0.01987	0.44072	HY
497	GO:0072666	establishment of protein localization to...	20	6	2.26	1775	0.01987	1	HY
498	GO:0009636	response to toxic substance	159	27	17.99	830	0.02008	0.45668	HY
499	GO:0035966	response to topologically incorrect prot...	56	12	6.34	1776	0.02082	1	HY
500	GO:0006536	glutamate metabolic process	15	5	1.7	1777	0.02092	1	HY
501	GO:0060261	positive regulation of transcription ini...	15	5	1.7	435	0.02092	0.18269	HY
502	GO:2000144	positive regulation of DNA-templated tra...	15	5	1.7	1778	0.02092	1	HY
503	GO:0008654	phospholipid biosynthetic process	76	15	8.6	957	0.02176	0.61563	HY
504	GO:0006528	asparagine metabolic process	6	3	0.68	226	0.02221	0.11303	HY
505	GO:0006690	icosanoid metabolic process	6	3	0.68	1779	0.02221	1	HY
506	GO:0009125	nucleoside monophosphate catabolic proce...	6	3	0.68	1780	0.02221	1	HY
507	GO:0009158	ribonucleoside monophosphate catabolic p...	6	3	0.68	227	0.02221	0.11303	HY
508	GO:0010039	response to iron ion	6	3	0.68	467	0.02221	0.21328	HY
509	GO:0015937	coenzyme A biosynthetic process	6	3	0.68	110	0.02221	0.02221	HY
510	GO:0046688	response to copper ion	6	3	0.68	111	0.02221	0.02221	HY
511	GO:0097428	protein maturation by iron-sulfur cluste...	6	3	0.68	596	0.02221	0.30219	HY
512	GO:0070328	triglyceride homeostasis	32	8	3.62	113	0.02316	0.02316	HY
513	GO:0019216	regulation of lipid metabolic process	51	11	5.77	434	0.02512	0.18227	HY
514	GO:0030968	endoplasmic reticulum unfolded protein r...	21	6	2.38	427	0.02523	0.15977	HY
515	GO:0042398	cellular modified amino acid biosyntheti...	21	6	2.38	1781	0.02523	1	HY
516	GO:0072523	purine-containing compound catabolic pro...	21	6	2.38	1782	0.02523	1	HY
517	GO:0072665	protein localization to vacuole	21	6	2.38	1783	0.02523	1	HY
518	GO:0006986	response to unfolded protein	39	9	4.41	1784	0.02724	1	HY
519	GO:1901615	organic hydroxy compound metabolic proce...	156	26	17.65	1785	0.02751	1	HY
520	GO:0055090	acylglycerol homeostasis	33	8	3.73	1786	0.02763	1	HY
521	GO:0000266	mitochondrial fission	16	5	1.81	436	0.02766	0.18272	HY
522	GO:0009409	response to cold	16	5	1.81	793	0.02766	0.45076	HY
523	GO:0006094	gluconeogenesis	11	4	1.24	114	0.02803	0.02803	HY
524	GO:0006801	superoxide metabolic process	11	4	1.24	1787	0.02803	1	HY
525	GO:0008090	retrograde axonal transport	11	4	1.24	115	0.02803	0.02803	HY
526	GO:0019319	hexose biosynthetic process	11	4	1.24	1788	0.02803	1	HY
527	GO:0030301	cholesterol transport	11	4	1.24	1789	0.02803	1	HY
528	GO:0042407	cristae formation	11	4	1.24	583	0.02803	0.27045	HY
529	GO:0045981	positive regulation of nucleotide metabo...	11	4	1.24	1790	0.02803	1	HY
530	GO:0046513	ceramide biosynthetic process	11	4	1.24	144	0.02803	0.0356	HY
531	GO:0006511	ubiquitin-dependent protein catabolic pr...	315	47	35.64	1371	0.02851	0.97754	HY
532	GO:0006664	glycolipid metabolic process	52	11	5.88	1791	0.02871	1	HY
533	GO:1903509	liposaccharide metabolic process	52	11	5.88	1792	0.02871	1	HY
534	GO:0015711	organic anion transport	135	23	15.28	1793	0.02914	1	HY
535	GO:0006890	retrograde vesicle-mediated transport, G...	22	6	2.49	117	0.03146	0.03146	HY
536	GO:0046486	glycerolipid metabolic process	151	25	17.09	1794	0.03246	1	HY
537	GO:0035967	cellular response to topologically incor...	53	11	6	1795	0.03266	1	HY
538	GO:0009247	glycolipid biosynthetic process	47	10	5.32	123	0.03478	0.03534	HY
539	GO:0009895	negative regulation of catabolic process	47	10	5.32	1796	0.03478	1	HY
540	GO:0001525	angiogenesis	3	2	0.34	127	0.03549	0.03549	HY
541	GO:0001568	blood vessel development	3	2	0.34	1797	0.03549	1	HY
542	GO:0002084	protein depalmitoylation	3	2	0.34	128	0.03549	0.03549	HY
543	GO:0002188	translation reinitiation	3	2	0.34	129	0.03549	0.03549	HY
544	GO:0006014	D-ribose metabolic process	3	2	0.34	130	0.03549	0.03549	HY
545	GO:0006067	ethanol metabolic process	3	2	0.34	232	0.03549	0.11309	HY
546	GO:0006089	lactate metabolic process	3	2	0.34	1798	0.03549	1	HY
547	GO:0006105	succinate metabolic process	3	2	0.34	131	0.03549	0.03549	HY
548	GO:0006145	purine nucleobase catabolic process	3	2	0.34	1799	0.03549	1	HY
549	GO:0006419	alanyl-tRNA aminoacylation	3	2	0.34	132	0.03549	0.03549	HY
550	GO:0006564	L-serine biosynthetic process	3	2	0.34	133	0.03549	0.03549	HY
551	GO:0006573	valine metabolic process	3	2	0.34	1800	0.03549	1	HY
552	GO:0009133	nucleoside diphosphate biosynthetic proc...	3	2	0.34	1801	0.03549	1	HY
553	GO:0009448	gamma-aminobutyric acid metabolic proces...	3	2	0.34	1802	0.03549	1	HY
554	GO:0015693	magnesium ion transport	3	2	0.34	233	0.03549	0.11309	HY
555	GO:0015782	CMP-N-acetylneuraminate transmembrane tr...	3	2	0.34	134	0.03549	0.03549	HY
556	GO:0015886	heme transport	3	2	0.34	468	0.03549	0.21338	HY
557	GO:0016560	protein import into peroxisome matrix, d...	3	2	0.34	135	0.03549	0.03549	HY
558	GO:0019673	GDP-mannose metabolic process	3	2	0.34	234	0.03549	0.11309	HY
559	GO:0032371	regulation of sterol transport	3	2	0.34	1803	0.03549	1	HY
560	GO:0032374	regulation of cholesterol transport	3	2	0.34	1804	0.03549	1	HY
561	GO:0042053	regulation of dopamine metabolic process	3	2	0.34	469	0.03549	0.21338	HY
562	GO:0042726	flavin-containing compound metabolic pro...	3	2	0.34	1805	0.03549	1	HY
563	GO:0042727	flavin-containing compound biosynthetic ...	3	2	0.34	1806	0.03549	1	HY
564	GO:0044571	[2Fe-2S] cluster assembly	3	2	0.34	136	0.03549	0.03549	HY
565	GO:0048081	positive regulation of cuticle pigmentat...	3	2	0.34	137	0.03549	0.03549	HY
566	GO:0048514	blood vessel morphogenesis	3	2	0.34	1807	0.03549	1	HY
567	GO:0051131	chaperone-mediated protein complex assem...	3	2	0.34	138	0.03549	0.03549	HY
568	GO:0060699	regulation of endoribonuclease activity	3	2	0.34	1808	0.03549	1	HY
569	GO:0060700	regulation of ribonuclease activity	3	2	0.34	1809	0.03549	1	HY
570	GO:0061687	detoxification of inorganic compound	3	2	0.34	1810	0.03549	1	HY
571	GO:0097039	protein linear polyubiquitination	3	2	0.34	139	0.03549	0.03549	HY
572	GO:0106035	protein maturation by [4Fe-4S] cluster t...	3	2	0.34	140	0.03549	0.03549	HY
573	GO:1901678	iron coordination entity transport	3	2	0.34	1811	0.03549	1	HY
574	GO:1990564	protein polyufmylation	3	2	0.34	1812	0.03549	1	HY
575	GO:1990592	protein K69-linked ufmylation	3	2	0.34	141	0.03549	0.03549	HY
576	GO:0006900	vesicle budding from membrane	17	5	1.92	1813	0.03563	1	HY
577	GO:0015807	L-amino acid transport	17	5	1.92	1814	0.03563	1	HY
578	GO:1903578	regulation of ATP metabolic process	17	5	1.92	1815	0.03563	1	HY
579	GO:0001731	formation of translation preinitiation c...	7	3	0.79	145	0.03564	0.03564	HY
580	GO:0006488	dolichol-linked oligosaccharide biosynth...	7	3	0.79	146	0.03564	0.03564	HY
581	GO:0006714	sesquiterpenoid metabolic process	7	3	0.79	1816	0.03564	1	HY
582	GO:0006716	juvenile hormone metabolic process	7	3	0.79	1817	0.03564	1	HY
583	GO:0009083	branched-chain amino acid catabolic proc...	7	3	0.79	1818	0.03564	1	HY
584	GO:0010823	negative regulation of mitochondrion org...	7	3	0.79	1819	0.03564	1	HY
585	GO:0015780	nucleotide-sugar transmembrane transport	7	3	0.79	1820	0.03564	1	HY
586	GO:0015936	coenzyme A metabolic process	7	3	0.79	1821	0.03564	1	HY
587	GO:0017062	respiratory chain complex III assembly	7	3	0.79	1822	0.03564	1	HY
588	GO:0034308	primary alcohol metabolic process	7	3	0.79	1823	0.03564	1	HY
589	GO:0034551	mitochondrial respiratory chain complex ...	7	3	0.79	147	0.03564	0.03564	HY
590	GO:0038001	paracrine signaling	7	3	0.79	148	0.03564	0.03564	HY
591	GO:0043650	dicarboxylic acid biosynthetic process	7	3	0.79	1824	0.03564	1	HY
592	GO:0090141	positive regulation of mitochondrial fis...	7	3	0.79	149	0.03564	0.03564	HY
593	GO:0090481	pyrimidine nucleotide-sugar transmembran...	7	3	0.79	1825	0.03564	1	HY
594	GO:0032940	secretion by cell	235	36	26.59	1826	0.03596	1	HY
595	GO:0043473	pigmentation	95	17	10.75	1827	0.03677	1	HY
596	GO:0001676	long-chain fatty acid metabolic process	12	4	1.36	566	0.03836	0.22636	HY
597	GO:0002183	cytoplasmic translational initiation	12	4	1.36	1828	0.03836	1	HY
598	GO:0006206	pyrimidine nucleobase metabolic process	12	4	1.36	222	0.03836	0.113	HY
599	GO:0034389	lipid droplet organization	12	4	1.36	409	0.03836	0.11929	HY
600	GO:0042219	cellular modified amino acid catabolic p...	12	4	1.36	1829	0.03836	1	HY
601	GO:0044273	sulfur compound catabolic process	12	4	1.36	1830	0.03836	1	HY
602	GO:0044270	cellular nitrogen compound catabolic pro...	207	32	23.42	1831	0.04121	1	HY
603	GO:0046942	carboxylic acid transport	97	17	10.98	1832	0.04377	1	HY
604	GO:0065008	regulation of biological quality	1357	173	153.55	1833	0.04377	1	HY
605	GO:0006641	triglyceride metabolic process	36	8	4.07	103	0.04453	0.0195	HY
606	GO:0043933	protein-containing complex subunit organ...	735	98	83.17	1834	0.04471	1	HY
607	GO:0033866	nucleoside bisphosphate biosynthetic pro...	18	5	2.04	1835	0.04488	1	HY
608	GO:0034030	ribonucleoside bisphosphate biosynthetic...	18	5	2.04	1836	0.04488	1	HY
609	GO:0034033	purine nucleoside bisphosphate biosynthe...	18	5	2.04	1837	0.04488	1	HY
610	GO:1905954	positive regulation of lipid localizatio...	18	5	2.04	1838	0.04488	1	HY
611	GO:0044265	cellular macromolecule catabolic process	492	68	55.67	1839	0.04559	1	HY
612	GO:1901616	organic hydroxy compound catabolic proce...	24	6	2.72	1840	0.04673	1	HY
613	GO:0033500	carbohydrate homeostasis	56	11	6.34	958	0.04677	0.61614	HY
614	GO:0015849	organic acid transport	98	17	11.09	1841	0.0476	1	HY
615	GO:0042737	drug catabolic process	63	12	7.13	1842	0.04789	1	HY
616	GO:0006637	acyl-CoA metabolic process	43	9	4.87	792	0.04825	0.45051	HY
617	GO:0035383	thioester metabolic process	43	9	4.87	1843	0.04825	1	HY
618	GO:0010256	endomembrane system organization	165	26	18.67	1844	0.05025	1	HY
619	GO:0006721	terpenoid metabolic process	13	4	1.47	1845	0.05058	1	HY
620	GO:0045116	protein neddylation	13	4	1.47	567	0.05058	0.22639	HY
621	GO:0046700	heterocycle catabolic process	211	32	23.88	1846	0.05151	1	HY
622	GO:0006544	glycine metabolic process	8	3	0.91	1847	0.05232	1	HY
623	GO:0006896	Golgi to vacuole transport	8	3	0.91	152	0.05232	0.05232	HY
624	GO:0009226	nucleotide-sugar biosynthetic process	8	3	0.91	1848	0.05232	1	HY
625	GO:0009631	cold acclimation	8	3	0.91	153	0.05232	0.05232	HY
626	GO:0016114	terpenoid biosynthetic process	8	3	0.91	1849	0.05232	1	HY
627	GO:0045899	positive regulation of RNA polymerase II...	8	3	0.91	154	0.05232	0.05232	HY
628	GO:0046653	tetrahydrofolate metabolic process	8	3	0.91	1850	0.05232	1	HY
629	GO:0048680	positive regulation of axon regeneration	8	3	0.91	1851	0.05232	1	HY
630	GO:0048682	sprouting of injured axon	8	3	0.91	1852	0.05232	1	HY
631	GO:0070572	positive regulation of neuron projection...	8	3	0.91	1853	0.05232	1	HY
632	GO:0046903	secretion	258	38	29.19	1854	0.05325	1	HY
633	GO:0071456	cellular response to hypoxia	31	7	3.51	437	0.05411	0.18305	HY
634	GO:1901568	fatty acid derivative metabolic process	31	7	3.51	1855	0.05411	1	HY
635	GO:0006638	neutral lipid metabolic process	44	9	4.98	1856	0.05482	1	HY
636	GO:0006639	acylglycerol metabolic process	44	9	4.98	1857	0.05482	1	HY
637	GO:0006584	catecholamine metabolic process	19	5	2.15	1858	0.05543	1	HY
638	GO:0009712	catechol-containing compound metabolic p...	19	5	2.15	1859	0.05543	1	HY
639	GO:0051259	protein complex oligomerization	19	5	2.15	219	0.05543	0.11299	HY
640	GO:0055072	iron ion homeostasis	19	5	2.15	1860	0.05543	1	HY
641	GO:1900542	regulation of purine nucleotide metaboli...	19	5	2.15	1861	0.05543	1	HY
642	GO:0008643	carbohydrate transport	25	6	2.83	463	0.05582	0.21315	HY
643	GO:0030433	ubiquitin-dependent ERAD pathway	25	6	2.83	210	0.05582	0.11024	HY
644	GO:0048066	developmental pigmentation	86	15	9.73	912	0.05782	0.56718	HY
645	GO:0031330	negative regulation of cellular cataboli...	45	9	5.09	1862	0.06194	1	HY
646	GO:0000270	peptidoglycan metabolic process	14	4	1.58	1863	0.06468	1	HY
647	GO:0009253	peptidoglycan catabolic process	14	4	1.58	161	0.06468	0.06468	HY
648	GO:0010565	regulation of cellular ketone metabolic ...	14	4	1.58	1864	0.06468	1	HY
649	GO:0055093	response to hyperoxia	14	4	1.58	162	0.06468	0.06468	HY
650	GO:0097501	stress response to metal ion	14	4	1.58	1865	0.06468	1	HY
651	GO:0001944	vasculature development	4	2	0.45	1866	0.06569	1	HY
652	GO:0006104	succinyl-CoA metabolic process	4	2	0.45	165	0.06569	0.06569	HY
653	GO:0006196	AMP catabolic process	4	2	0.45	166	0.06569	0.06569	HY
654	GO:0006545	glycine biosynthetic process	4	2	0.45	598	0.06569	0.30234	HY
655	GO:0006723	cuticle hydrocarbon biosynthetic process	4	2	0.45	167	0.06569	0.06569	HY
656	GO:0006844	acyl carnitine transport	4	2	0.45	168	0.06569	0.06569	HY
657	GO:0006850	mitochondrial pyruvate transmembrane tra...	4	2	0.45	169	0.06569	0.06569	HY
658	GO:0008300	isoprenoid catabolic process	4	2	0.45	1867	0.06569	1	HY
659	GO:0010636	positive regulation of mitochondrial fus...	4	2	0.45	170	0.06569	0.06569	HY
660	GO:0010637	negative regulation of mitochondrial fus...	4	2	0.45	171	0.06569	0.06569	HY
661	GO:0015697	quaternary ammonium group transport	4	2	0.45	1868	0.06569	1	HY
662	GO:0015802	basic amino acid transport	4	2	0.45	1869	0.06569	1	HY
663	GO:0015809	arginine transport	4	2	0.45	235	0.06569	0.1131	HY
664	GO:0015810	aspartate transmembrane transport	4	2	0.45	172	0.06569	0.06569	HY
665	GO:0019348	dolichol metabolic process	4	2	0.45	1870	0.06569	1	HY
666	GO:0023041	neuronal signal transduction	4	2	0.45	599	0.06569	0.30234	HY
667	GO:0030388	fructose 1,6-bisphosphate metabolic proc...	4	2	0.45	173	0.06569	0.06569	HY
668	GO:0030473	nuclear migration along microtubule	4	2	0.45	174	0.06569	0.06569	HY
669	GO:0030810	positive regulation of nucleotide biosyn...	4	2	0.45	1871	0.06569	1	HY
670	GO:0032069	regulation of nuclease activity	4	2	0.45	1872	0.06569	1	HY
671	GO:0035434	copper ion transmembrane transport	4	2	0.45	600	0.06569	0.30234	HY
672	GO:0035437	maintenance of protein localization in e...	4	2	0.45	236	0.06569	0.1131	HY
673	GO:0035999	tetrahydrofolate interconversion	4	2	0.45	175	0.06569	0.06569	HY
674	GO:0042159	lipoprotein catabolic process	4	2	0.45	1873	0.06569	1	HY
675	GO:0043101	purine-containing compound salvage	4	2	0.45	1874	0.06569	1	HY
676	GO:0046167	glycerol-3-phosphate biosynthetic proces...	4	2	0.45	176	0.06569	0.06569	HY
677	GO:0048013	ephrin receptor signaling pathway	4	2	0.45	177	0.06569	0.06569	HY
678	GO:0048211	Golgi vesicle docking	4	2	0.45	178	0.06569	0.06569	HY
679	GO:0048524	positive regulation of viral process	4	2	0.45	1875	0.06569	1	HY
680	GO:0050667	homocysteine metabolic process	4	2	0.45	1876	0.06569	1	HY
681	GO:0070861	regulation of protein exit from endoplas...	4	2	0.45	237	0.06569	0.1131	HY
682	GO:0072358	cardiovascular system development	4	2	0.45	1877	0.06569	1	HY
683	GO:0098734	macromolecule depalmitoylation	4	2	0.45	1878	0.06569	1	HY
684	GO:1900037	regulation of cellular response to hypox...	4	2	0.45	470	0.06569	0.21339	HY
685	GO:1900373	positive regulation of purine nucleotide...	4	2	0.45	1879	0.06569	1	HY
686	GO:1903902	positive regulation of viral life cycle	4	2	0.45	1880	0.06569	1	HY
687	GO:1905897	regulation of response to endoplasmic re...	4	2	0.45	1881	0.06569	1	HY
688	GO:2001169	regulation of ATP biosynthetic process	4	2	0.45	1882	0.06569	1	HY
689	GO:0033227	dsRNA transport	26	6	2.94	179	0.0659	0.0659	HY
690	GO:0042440	pigment metabolic process	117	19	13.24	1883	0.06656	1	HY
691	GO:0006418	tRNA aminoacylation for protein translat...	39	8	4.41	1884	0.0671	1	HY
692	GO:0006140	regulation of nucleotide metabolic proce...	20	5	2.26	1885	0.06728	1	HY
693	GO:0062013	positive regulation of small molecule me...	20	5	2.26	1886	0.06728	1	HY
694	GO:1901361	organic cyclic compound catabolic proces...	224	33	25.35	1887	0.06764	1	HY
695	GO:0030148	sphingolipid biosynthetic process	46	9	5.2	903	0.06963	0.54745	HY
696	GO:0000394	RNA splicing, via endonucleolytic cleava...	9	3	1.02	1888	0.07204	1	HY
697	GO:0006071	glycerol metabolic process	9	3	1.02	568	0.07204	0.22653	HY
698	GO:0006121	mitochondrial electron transport, succin...	9	3	1.02	181	0.07204	0.07204	HY
699	GO:0006388	tRNA splicing, via endonucleolytic cleav...	9	3	1.02	794	0.07204	0.45107	HY
700	GO:0006662	glycerol ether metabolic process	9	3	1.02	182	0.07204	0.07204	HY
701	GO:0006730	one-carbon metabolic process	9	3	1.02	795	0.07204	0.45107	HY
702	GO:0006734	NADH metabolic process	9	3	1.02	228	0.07204	0.11306	HY
703	GO:0008637	apoptotic mitochondrial changes	9	3	1.02	702	0.07204	0.38112	HY
704	GO:0009081	branched-chain amino acid metabolic proc...	9	3	1.02	1889	0.07204	1	HY
705	GO:0009404	toxin metabolic process	9	3	1.02	1890	0.07204	1	HY
706	GO:0015695	organic cation transport	9	3	1.02	1891	0.07204	1	HY
707	GO:0018904	ether metabolic process	9	3	1.02	1892	0.07204	1	HY
708	GO:0019400	alditol metabolic process	9	3	1.02	1893	0.07204	1	HY
709	GO:0032367	intracellular cholesterol transport	9	3	1.02	913	0.07204	0.56813	HY
710	GO:0046680	response to DDT	9	3	1.02	183	0.07204	0.07204	HY
711	GO:0046686	response to cadmium ion	9	3	1.02	229	0.07204	0.11306	HY
712	GO:0048047	mating behavior, sex discrimination	9	3	1.02	184	0.07204	0.07204	HY
713	GO:0090140	regulation of mitochondrial fission	9	3	1.02	1894	0.07204	1	HY
714	GO:0036294	cellular response to decreased oxygen le...	33	7	3.73	1895	0.07224	1	HY
715	GO:0030150	protein import into mitochondrial matrix	27	6	3.06	185	0.07697	0.07697	HY
716	GO:0042593	glucose homeostasis	47	9	5.32	208	0.07788	0.10515	HY
717	GO:0062012	regulation of small molecule metabolic p...	47	9	5.32	1896	0.07788	1	HY
718	GO:0022411	cellular component disassembly	150	23	16.97	1897	0.07994	1	HY
719	GO:0000413	protein peptidyl-prolyl isomerization	21	5	2.38	186	0.08043	0.08043	HY
720	GO:0006576	cellular biogenic amine metabolic proces...	21	5	2.38	1898	0.08043	1	HY
721	GO:0009225	nucleotide-sugar metabolic process	21	5	2.38	1899	0.08043	1	HY
722	GO:0042558	pteridine-containing compound metabolic ...	21	5	2.38	1900	0.08043	1	HY
723	GO:0002785	negative regulation of antimicrobial pep...	15	4	1.7	1901	0.08059	1	HY
724	GO:0002812	biosynthetic process of antibacterial pe...	15	4	1.7	1902	0.08059	1	HY
725	GO:0002813	regulation of biosynthetic process of an...	15	4	1.7	1903	0.08059	1	HY
726	GO:0036296	response to increased oxygen levels	15	4	1.7	1904	0.08059	1	HY
727	GO:0044719	regulation of imaginal disc-derived wing...	15	4	1.7	448	0.08059	0.20517	HY
728	GO:0034622	cellular protein-containing complex asse...	567	75	64.16	1905	0.08211	1	HY
729	GO:0071453	cellular response to oxygen levels	34	7	3.85	1906	0.0825	1	HY
730	GO:0043039	tRNA aminoacylation	41	8	4.64	1907	0.08544	1	HY
731	GO:0098930	axonal transport	28	6	3.17	465	0.08903	0.2132	HY
732	GO:0006506	GPI anchor biosynthetic process	35	7	3.96	574	0.09356	0.24673	HY
733	GO:0036503	ERAD pathway	35	7	3.96	1908	0.09356	1	HY
734	GO:0006044	N-acetylglucosamine metabolic process	10	3	1.13	959	0.09453	0.61696	HY
735	GO:0006636	unsaturated fatty acid biosynthetic proc...	10	3	1.13	417	0.09453	0.14091	HY
736	GO:0009395	phospholipid catabolic process	10	3	1.13	1909	0.09453	1	HY
737	GO:0015800	acidic amino acid transport	10	3	1.13	1910	0.09453	1	HY
738	GO:0032366	intracellular sterol transport	10	3	1.13	1911	0.09453	1	HY
739	GO:0042430	indole-containing compound metabolic pro...	10	3	1.13	1912	0.09453	1	HY
740	GO:0048679	regulation of axon regeneration	10	3	1.13	1913	0.09453	1	HY
741	GO:0050766	positive regulation of phagocytosis	10	3	1.13	960	0.09453	0.61696	HY
742	GO:0070570	regulation of neuron projection regenera...	10	3	1.13	1914	0.09453	1	HY
743	GO:0048067	cuticle pigmentation	22	5	2.49	1915	0.09483	1	HY
744	GO:0072348	sulfur compound transport	22	5	2.49	1916	0.09483	1	HY
745	GO:0006865	amino acid transport	56	10	6.34	1917	0.09556	1	HY
746	GO:0043038	amino acid activation	42	8	4.75	1918	0.09561	1	HY
747	GO:0002698	negative regulation of immune effector p...	16	4	1.81	1919	0.09823	1	HY
748	GO:0002701	negative regulation of production of mol...	16	4	1.81	1920	0.09823	1	HY
749	GO:0006027	glycosaminoglycan catabolic process	16	4	1.81	1921	0.09823	1	HY
750	GO:0042417	dopamine metabolic process	16	4	1.81	1004	0.09823	0.66015	HY
751	GO:0001306	age-dependent response to oxidative stre...	5	2	0.57	703	0.10141	0.38125	HY
752	GO:0006047	UDP-N-acetylglucosamine metabolic proces...	5	2	0.57	238	0.10141	0.11311	HY
753	GO:0006117	acetaldehyde metabolic process	5	2	0.57	191	0.10141	0.10141	HY
754	GO:0006208	pyrimidine nucleobase catabolic process	5	2	0.57	1922	0.10141	1	HY
755	GO:0006537	glutamate biosynthetic process	5	2	0.57	192	0.10141	0.10141	HY
756	GO:0006563	L-serine metabolic process	5	2	0.57	1923	0.10141	1	HY
757	GO:0006591	ornithine metabolic process	5	2	0.57	704	0.10141	0.38125	HY
758	GO:0006692	prostanoid metabolic process	5	2	0.57	1924	0.10141	1	HY
759	GO:0006693	prostaglandin metabolic process	5	2	0.57	239	0.10141	0.11311	HY
760	GO:0006718	juvenile hormone biosynthetic process	5	2	0.57	240	0.10141	0.11311	HY
761	GO:0006750	glutathione biosynthetic process	5	2	0.57	193	0.10141	0.10141	HY
762	GO:0007311	maternal specification of dorsal/ventral...	5	2	0.57	194	0.10141	0.10141	HY
763	GO:0007571	age-dependent general metabolic decline	5	2	0.57	1925	0.10141	1	HY
764	GO:0009128	purine nucleoside monophosphate cataboli...	5	2	0.57	1926	0.10141	1	HY
765	GO:0009169	purine ribonucleoside monophosphate cata...	5	2	0.57	1927	0.10141	1	HY
766	GO:0015813	L-glutamate transmembrane transport	5	2	0.57	195	0.10141	0.10141	HY
767	GO:0015858	nucleoside transport	5	2	0.57	1928	0.10141	1	HY
768	GO:0016106	sesquiterpenoid biosynthetic process	5	2	0.57	1929	0.10141	1	HY
769	GO:0016255	attachment of GPI anchor to protein	5	2	0.57	196	0.10141	0.10141	HY
770	GO:0018065	protein-cofactor linkage	5	2	0.57	1930	0.10141	1	HY
771	GO:0030037	actin filament reorganization involved i...	5	2	0.57	197	0.10141	0.10141	HY
772	GO:0032370	positive regulation of lipid transport	5	2	0.57	1931	0.10141	1	HY
773	GO:0034755	iron ion transmembrane transport	5	2	0.57	1932	0.10141	1	HY
774	GO:0036466	synaptic vesicle recycling via endosome	5	2	0.57	198	0.10141	0.10141	HY
775	GO:0043555	regulation of translation in response to...	5	2	0.57	1933	0.10141	1	HY
776	GO:0046184	aldehyde biosynthetic process	5	2	0.57	1934	0.10141	1	HY
777	GO:0046473	phosphatidic acid metabolic process	5	2	0.57	241	0.10141	0.11311	HY
778	GO:0046514	ceramide catabolic process	5	2	0.57	471	0.10141	0.21341	HY
779	GO:0051092	positive regulation of NF-kappaB transcr...	5	2	0.57	199	0.10141	0.10141	HY
780	GO:0051289	protein homotetramerization	5	2	0.57	200	0.10141	0.10141	HY
781	GO:0051881	regulation of mitochondrial membrane pot...	5	2	0.57	601	0.10141	0.30236	HY
782	GO:0071033	nuclear retention of pre-mRNA at the sit...	5	2	0.57	1935	0.10141	1	HY
783	GO:0071786	endoplasmic reticulum tubular network or...	5	2	0.57	201	0.10141	0.10141	HY
784	GO:0072321	chaperone-mediated protein transport	5	2	0.57	202	0.10141	0.10141	HY
785	GO:0072334	UDP-galactose transmembrane transport	5	2	0.57	203	0.10141	0.10141	HY
786	GO:1901475	pyruvate transmembrane transport	5	2	0.57	1936	0.10141	1	HY
787	GO:1901642	nucleoside transmembrane transport	5	2	0.57	204	0.10141	0.10141	HY
788	GO:2000434	regulation of protein neddylation	5	2	0.57	1937	0.10141	1	HY
789	GO:0034219	carbohydrate transmembrane transport	23	5	2.6	225	0.11044	0.11303	HY
790	GO:0000050	urea cycle	1	1	0.11	248	0.11315	0.11315	HY
791	GO:0000053	argininosuccinate metabolic process	1	1	0.11	249	0.11315	0.11315	HY
792	GO:0000101	sulfur amino acid transport	1	1	0.11	1938	0.11315	1	HY
793	GO:0000378	RNA exon ligation	1	1	0.11	1939	0.11315	1	HY
794	GO:0000461	endonucleolytic cleavage to generate mat...	1	1	0.11	250	0.11315	0.11315	HY
795	GO:0000968	tRNA exon ligation	1	1	0.11	1940	0.11315	1	HY
796	GO:0000971	tRNA exon ligation utilizing 2',3' cycli...	1	1	0.11	251	0.11315	0.11315	HY
797	GO:0001315	age-dependent response to reactive oxyge...	1	1	0.11	252	0.11315	0.11315	HY
798	GO:0001762	beta-alanine transport	1	1	0.11	253	0.11315	0.11315	HY
799	GO:0002191	cap-dependent translational initiation	1	1	0.11	254	0.11315	0.11315	HY
800	GO:0003407	neural retina development	1	1	0.11	1941	0.11315	1	HY
801	GO:0005985	sucrose metabolic process	1	1	0.11	1942	0.11315	1	HY
802	GO:0005986	sucrose biosynthetic process	1	1	0.11	255	0.11315	0.11315	HY
803	GO:0006041	glucosamine metabolic process	1	1	0.11	1943	0.11315	1	HY
804	GO:0006043	glucosamine catabolic process	1	1	0.11	256	0.11315	0.11315	HY
805	GO:0006054	N-acetylneuraminate metabolic process	1	1	0.11	1944	0.11315	1	HY
806	GO:0006147	guanine catabolic process	1	1	0.11	257	0.11315	0.11315	HY
807	GO:0006168	adenine salvage	1	1	0.11	258	0.11315	0.11315	HY
808	GO:0006427	histidyl-tRNA aminoacylation	1	1	0.11	259	0.11315	0.11315	HY
809	GO:0006435	threonyl-tRNA aminoacylation	1	1	0.11	260	0.11315	0.11315	HY
810	GO:0006532	aspartate biosynthetic process	1	1	0.11	261	0.11315	0.11315	HY
811	GO:0006533	aspartate catabolic process	1	1	0.11	262	0.11315	0.11315	HY
812	GO:0006539	glutamate catabolic process via 2-oxoglu...	1	1	0.11	263	0.11315	0.11315	HY
813	GO:0006554	lysine catabolic process	1	1	0.11	264	0.11315	0.11315	HY
814	GO:0006617	SRP-dependent cotranslational protein ta...	1	1	0.11	265	0.11315	0.11315	HY
815	GO:0006624	vacuolar protein processing	1	1	0.11	266	0.11315	0.11315	HY
816	GO:0006666	3-keto-sphinganine metabolic process	1	1	0.11	267	0.11315	0.11315	HY
817	GO:0006670	sphingosine metabolic process	1	1	0.11	1945	0.11315	1	HY
818	GO:0006680	glucosylceramide catabolic process	1	1	0.11	268	0.11315	0.11315	HY
819	GO:0006707	cholesterol catabolic process	1	1	0.11	269	0.11315	0.11315	HY
820	GO:0006735	NADH regeneration	1	1	0.11	1946	0.11315	1	HY
821	GO:0006748	lipoamide metabolic process	1	1	0.11	270	0.11315	0.11315	HY
822	GO:0006771	riboflavin metabolic process	1	1	0.11	1947	0.11315	1	HY
823	GO:0006772	thiamine metabolic process	1	1	0.11	271	0.11315	0.11315	HY
824	GO:0006982	response to lipid hydroperoxide	1	1	0.11	272	0.11315	0.11315	HY
825	GO:0006990	positive regulation of transcription fro...	1	1	0.11	273	0.11315	0.11315	HY
826	GO:0008206	bile acid metabolic process	1	1	0.11	274	0.11315	0.11315	HY
827	GO:0008209	androgen metabolic process	1	1	0.11	275	0.11315	0.11315	HY
828	GO:0008210	estrogen metabolic process	1	1	0.11	276	0.11315	0.11315	HY
829	GO:0009115	xanthine catabolic process	1	1	0.11	277	0.11315	0.11315	HY
830	GO:0009229	thiamine diphosphate biosynthetic proces...	1	1	0.11	278	0.11315	0.11315	HY
831	GO:0009231	riboflavin biosynthetic process	1	1	0.11	279	0.11315	0.11315	HY
832	GO:0009257	10-formyltetrahydrofolate biosynthetic p...	1	1	0.11	280	0.11315	0.11315	HY
833	GO:0009398	FMN biosynthetic process	1	1	0.11	281	0.11315	0.11315	HY
834	GO:0009609	response to symbiotic bacterium	1	1	0.11	282	0.11315	0.11315	HY
835	GO:0009785	blue light signaling pathway	1	1	0.11	283	0.11315	0.11315	HY
836	GO:0010121	arginine catabolic process to proline vi...	1	1	0.11	284	0.11315	0.11315	HY
837	GO:0010142	farnesyl diphosphate biosynthetic proces...	1	1	0.11	285	0.11315	0.11315	HY
838	GO:0010310	regulation of hydrogen peroxide metaboli...	1	1	0.11	286	0.11315	0.11315	HY
839	GO:0010961	cellular magnesium ion homeostasis	1	1	0.11	287	0.11315	0.11315	HY
840	GO:0010995	free ubiquitin chain depolymerization	1	1	0.11	288	0.11315	0.11315	HY
841	GO:0014819	regulation of skeletal muscle contractio...	1	1	0.11	1948	0.11315	1	HY
842	GO:0014821	phasic smooth muscle contraction	1	1	0.11	1949	0.11315	1	HY
843	GO:0014852	regulation of skeletal muscle contractio...	1	1	0.11	1950	0.11315	1	HY
844	GO:0014853	regulation of excitatory postsynaptic me...	1	1	0.11	289	0.11315	0.11315	HY
845	GO:0015691	cadmium ion transport	1	1	0.11	1951	0.11315	1	HY
846	GO:0015757	galactose transmembrane transport	1	1	0.11	290	0.11315	0.11315	HY
847	GO:0015805	S-adenosyl-L-methionine transport	1	1	0.11	291	0.11315	0.11315	HY
848	GO:0015811	L-cystine transport	1	1	0.11	292	0.11315	0.11315	HY
849	GO:0015870	acetylcholine transport	1	1	0.11	293	0.11315	0.11315	HY
850	GO:0015910	peroxisomal long-chain fatty acid import	1	1	0.11	294	0.11315	0.11315	HY
851	GO:0016095	polyprenol catabolic process	1	1	0.11	295	0.11315	0.11315	HY
852	GO:0016127	sterol catabolic process	1	1	0.11	1952	0.11315	1	HY
853	GO:0016444	somatic cell DNA recombination	1	1	0.11	296	0.11315	0.11315	HY
854	GO:0017003	protein-heme linkage	1	1	0.11	1953	0.11315	1	HY
855	GO:0017006	protein-tetrapyrrole linkage	1	1	0.11	1954	0.11315	1	HY
856	GO:0017014	protein nitrosylation	1	1	0.11	1955	0.11315	1	HY
857	GO:0018063	cytochrome c-heme linkage	1	1	0.11	297	0.11315	0.11315	HY
858	GO:0018119	peptidyl-cysteine S-nitrosylation	1	1	0.11	1956	0.11315	1	HY
859	GO:0018160	peptidyl-pyrromethane cofactor linkage	1	1	0.11	298	0.11315	0.11315	HY
860	GO:0018282	metal incorporation into metallo-sulfur ...	1	1	0.11	1957	0.11315	1	HY
861	GO:0018283	iron incorporation into metallo-sulfur c...	1	1	0.11	299	0.11315	0.11315	HY
862	GO:0018395	peptidyl-lysine hydroxylation to 5-hydro...	1	1	0.11	300	0.11315	0.11315	HY
863	GO:0019243	methylglyoxal catabolic process to D-lac...	1	1	0.11	301	0.11315	0.11315	HY
864	GO:0019249	lactate biosynthetic process	1	1	0.11	1958	0.11315	1	HY
865	GO:0019262	N-acetylneuraminate catabolic process	1	1	0.11	302	0.11315	0.11315	HY
866	GO:0019264	glycine biosynthetic process from serine	1	1	0.11	303	0.11315	0.11315	HY
867	GO:0019323	pentose catabolic process	1	1	0.11	304	0.11315	0.11315	HY
868	GO:0019369	arachidonic acid metabolic process	1	1	0.11	305	0.11315	0.11315	HY
869	GO:0019405	alditol catabolic process	1	1	0.11	1959	0.11315	1	HY
870	GO:0019493	arginine catabolic process to proline	1	1	0.11	1960	0.11315	1	HY
871	GO:0019520	aldonic acid metabolic process	1	1	0.11	1961	0.11315	1	HY
872	GO:0019521	D-gluconate metabolic process	1	1	0.11	1962	0.11315	1	HY
873	GO:0019544	arginine catabolic process to glutamate	1	1	0.11	306	0.11315	0.11315	HY
874	GO:0019563	glycerol catabolic process	1	1	0.11	307	0.11315	0.11315	HY
875	GO:0019627	urea metabolic process	1	1	0.11	1963	0.11315	1	HY
876	GO:0019835	cytolysis	1	1	0.11	308	0.11315	0.11315	HY
877	GO:0030216	keratinocyte differentiation	1	1	0.11	309	0.11315	0.11315	HY
878	GO:0030299	intestinal cholesterol absorption	1	1	0.11	310	0.11315	0.11315	HY
879	GO:0030318	melanocyte differentiation	1	1	0.11	311	0.11315	0.11315	HY
880	GO:0030432	peristalsis	1	1	0.11	312	0.11315	0.11315	HY
881	GO:0032218	riboflavin transport	1	1	0.11	313	0.11315	0.11315	HY
882	GO:0032223	negative regulation of synaptic transmis...	1	1	0.11	314	0.11315	0.11315	HY
883	GO:0032228	regulation of synaptic transmission, GAB...	1	1	0.11	1964	0.11315	1	HY
884	GO:0032229	negative regulation of synaptic transmis...	1	1	0.11	315	0.11315	0.11315	HY
885	GO:0032468	Golgi calcium ion homeostasis	1	1	0.11	316	0.11315	0.11315	HY
886	GO:0032472	Golgi calcium ion transport	1	1	0.11	317	0.11315	0.11315	HY
887	GO:0033129	positive regulation of histone phosphory...	1	1	0.11	318	0.11315	0.11315	HY
888	GO:0033145	positive regulation of intracellular ste...	1	1	0.11	1965	0.11315	1	HY
889	GO:0033194	response to hydroperoxide	1	1	0.11	1966	0.11315	1	HY
890	GO:0033239	negative regulation of cellular amine me...	1	1	0.11	1967	0.11315	1	HY
891	GO:0033345	asparagine catabolic process via L-aspar...	1	1	0.11	319	0.11315	0.11315	HY
892	GO:0033501	galactose homeostasis	1	1	0.11	320	0.11315	0.11315	HY
893	GO:0033539	fatty acid beta-oxidation using acyl-CoA...	1	1	0.11	321	0.11315	0.11315	HY
894	GO:0034203	glycolipid translocation	1	1	0.11	322	0.11315	0.11315	HY
895	GO:0034477	U6 snRNA 3'-end processing	1	1	0.11	323	0.11315	0.11315	HY
896	GO:0035077	ecdysone-mediated polytene chromosome pu...	1	1	0.11	324	0.11315	0.11315	HY
897	GO:0035227	regulation of glutamate-cysteine ligase ...	1	1	0.11	1968	0.11315	1	HY
898	GO:0035229	positive regulation of glutamate-cystein...	1	1	0.11	325	0.11315	0.11315	HY
899	GO:0035964	COPI-coated vesicle budding	1	1	0.11	1969	0.11315	1	HY
900	GO:0035970	peptidyl-threonine dephosphorylation	1	1	0.11	326	0.11315	0.11315	HY
901	GO:0035977	protein deglycosylation involved in glyc...	1	1	0.11	1970	0.11315	1	HY
902	GO:0036084	GDP-fucose import into endoplasmic retic...	1	1	0.11	327	0.11315	0.11315	HY
903	GO:0036507	protein demannosylation	1	1	0.11	1971	0.11315	1	HY
904	GO:0036508	protein alpha-1,2-demannosylation	1	1	0.11	1972	0.11315	1	HY
905	GO:0036530	protein deglycation, methylglyoxal remov...	1	1	0.11	328	0.11315	0.11315	HY
906	GO:0038171	cannabinoid signaling pathway	1	1	0.11	1973	0.11315	1	HY
907	GO:0042351	'de novo' GDP-L-fucose biosynthetic proc...	1	1	0.11	329	0.11315	0.11315	HY
908	GO:0042357	thiamine diphosphate metabolic process	1	1	0.11	1974	0.11315	1	HY
909	GO:0042429	serotonin catabolic process	1	1	0.11	330	0.11315	0.11315	HY
910	GO:0042450	arginine biosynthetic process via ornith...	1	1	0.11	331	0.11315	0.11315	HY
911	GO:0042670	retinal cone cell differentiation	1	1	0.11	1975	0.11315	1	HY
912	GO:0042723	thiamine-containing compound metabolic p...	1	1	0.11	1976	0.11315	1	HY
913	GO:0043010	camera-type eye development	1	1	0.11	1977	0.11315	1	HY
914	GO:0043048	dolichyl monophosphate biosynthetic proc...	1	1	0.11	332	0.11315	0.11315	HY
915	GO:0043096	purine nucleobase salvage	1	1	0.11	1978	0.11315	1	HY
916	GO:0043104	positive regulation of GTP cyclohydrolas...	1	1	0.11	333	0.11315	0.11315	HY
917	GO:0043143	regulation of translation by machinery l...	1	1	0.11	334	0.11315	0.11315	HY
918	GO:0043588	skin development	1	1	0.11	1979	0.11315	1	HY
919	GO:0044209	AMP salvage	1	1	0.11	335	0.11315	0.11315	HY
920	GO:0044241	lipid digestion	1	1	0.11	1980	0.11315	1	HY
921	GO:0044375	regulation of peroxisome size	1	1	0.11	336	0.11315	0.11315	HY
922	GO:0044720	negative regulation of imaginal disc-der...	1	1	0.11	337	0.11315	0.11315	HY
923	GO:0045016	mitochondrial magnesium ion transmembran...	1	1	0.11	1981	0.11315	1	HY
924	GO:0045717	negative regulation of fatty acid biosyn...	1	1	0.11	338	0.11315	0.11315	HY
925	GO:0045900	negative regulation of translational elo...	1	1	0.11	339	0.11315	0.11315	HY
926	GO:0045914	negative regulation of catecholamine met...	1	1	0.11	1982	0.11315	1	HY
927	GO:0045922	negative regulation of fatty acid metabo...	1	1	0.11	1983	0.11315	1	HY
928	GO:0045963	negative regulation of dopamine metaboli...	1	1	0.11	340	0.11315	0.11315	HY
929	GO:0046098	guanine metabolic process	1	1	0.11	1984	0.11315	1	HY
930	GO:0046110	xanthine metabolic process	1	1	0.11	1985	0.11315	1	HY
931	GO:0046166	glyceraldehyde-3-phosphate biosynthetic ...	1	1	0.11	341	0.11315	0.11315	HY
932	GO:0046176	aldonic acid catabolic process	1	1	0.11	1986	0.11315	1	HY
933	GO:0046177	D-gluconate catabolic process	1	1	0.11	342	0.11315	0.11315	HY
934	GO:0046334	octopamine catabolic process	1	1	0.11	343	0.11315	0.11315	HY
935	GO:0046340	diacylglycerol catabolic process	1	1	0.11	344	0.11315	0.11315	HY
936	GO:0046444	FMN metabolic process	1	1	0.11	1987	0.11315	1	HY
937	GO:0046512	sphingosine biosynthetic process	1	1	0.11	345	0.11315	0.11315	HY
938	GO:0046520	sphingoid biosynthetic process	1	1	0.11	1988	0.11315	1	HY
939	GO:0046549	retinal cone cell development	1	1	0.11	346	0.11315	0.11315	HY
940	GO:0046836	glycolipid transport	1	1	0.11	1989	0.11315	1	HY
941	GO:0046866	tetraterpenoid transport	1	1	0.11	1990	0.11315	1	HY
942	GO:0046867	carotenoid transport	1	1	0.11	347	0.11315	0.11315	HY
943	GO:0046946	hydroxylysine metabolic process	1	1	0.11	1991	0.11315	1	HY
944	GO:0046948	hydroxylysine catabolic process	1	1	0.11	348	0.11315	0.11315	HY
945	GO:0046952	ketone body catabolic process	1	1	0.11	349	0.11315	0.11315	HY
946	GO:0048033	heme o metabolic process	1	1	0.11	1992	0.11315	1	HY
947	GO:0048034	heme O biosynthetic process	1	1	0.11	350	0.11315	0.11315	HY
948	GO:0048200	Golgi transport vesicle coating	1	1	0.11	1993	0.11315	1	HY
949	GO:0048205	COPI coating of Golgi vesicle	1	1	0.11	351	0.11315	0.11315	HY
950	GO:0048252	lauric acid metabolic process	1	1	0.11	352	0.11315	0.11315	HY
951	GO:0048593	camera-type eye morphogenesis	1	1	0.11	1994	0.11315	1	HY
952	GO:0050892	intestinal absorption	1	1	0.11	1995	0.11315	1	HY
953	GO:0050958	magnetoreception	1	1	0.11	1996	0.11315	1	HY
954	GO:0050968	detection of chemical stimulus involved ...	1	1	0.11	353	0.11315	0.11315	HY
955	GO:0050980	detection of light stimulus involved in ...	1	1	0.11	354	0.11315	0.11315	HY
956	GO:0051067	dihydropteridine metabolic process	1	1	0.11	355	0.11315	0.11315	HY
957	GO:0051182	coenzyme transport	1	1	0.11	1997	0.11315	1	HY
958	GO:0051596	methylglyoxal catabolic process	1	1	0.11	1998	0.11315	1	HY
959	GO:0051686	establishment of ER localization	1	1	0.11	356	0.11315	0.11315	HY
960	GO:0051938	L-glutamate import	1	1	0.11	357	0.11315	0.11315	HY
961	GO:0060003	copper ion export	1	1	0.11	358	0.11315	0.11315	HY
962	GO:0060041	retina development in camera-type eye	1	1	0.11	1999	0.11315	1	HY
963	GO:0060042	retina morphogenesis in camera-type eye	1	1	0.11	2000	0.11315	1	HY
964	GO:0060219	camera-type eye photoreceptor cell diffe...	1	1	0.11	2001	0.11315	1	HY
965	GO:0060625	regulation of protein deneddylation	1	1	0.11	359	0.11315	0.11315	HY
966	GO:0061615	glycolytic process through fructose-6-ph...	1	1	0.11	2002	0.11315	1	HY
967	GO:0061620	glycolytic process through glucose-6-pho...	1	1	0.11	2003	0.11315	1	HY
968	GO:0061621	canonical glycolysis	1	1	0.11	360	0.11315	0.11315	HY
969	GO:0061718	glucose catabolic process to pyruvate	1	1	0.11	2004	0.11315	1	HY
970	GO:0061727	methylglyoxal catabolic process to lacta...	1	1	0.11	2005	0.11315	1	HY
971	GO:0070574	cadmium ion transmembrane transport	1	1	0.11	361	0.11315	0.11315	HY
972	GO:0070682	proteasome regulatory particle assembly	1	1	0.11	362	0.11315	0.11315	HY
973	GO:0070903	mitochondrial tRNA thio-modification	1	1	0.11	363	0.11315	0.11315	HY
974	GO:0071072	negative regulation of phospholipid bios...	1	1	0.11	2006	0.11315	1	HY
975	GO:0071421	manganese ion transmembrane transport	1	1	0.11	364	0.11315	0.11315	HY
976	GO:0071483	cellular response to blue light	1	1	0.11	2007	0.11315	1	HY
977	GO:0071585	detoxification of cadmium ion	1	1	0.11	365	0.11315	0.11315	HY
978	GO:0071846	actin filament debranching	1	1	0.11	366	0.11315	0.11315	HY
979	GO:0071926	endocannabinoid signaling pathway	1	1	0.11	367	0.11315	0.11315	HY
980	GO:0080129	proteasome core complex assembly	1	1	0.11	368	0.11315	0.11315	HY
981	GO:0080164	regulation of nitric oxide metabolic pro...	1	1	0.11	369	0.11315	0.11315	HY
982	GO:0090155	negative regulation of sphingolipid bios...	1	1	0.11	2008	0.11315	1	HY
983	GO:0090156	cellular sphingolipid homeostasis	1	1	0.11	370	0.11315	0.11315	HY
984	GO:0090389	phagosome-lysosome fusion involved in ap...	1	1	0.11	371	0.11315	0.11315	HY
985	GO:0097037	heme export	1	1	0.11	372	0.11315	0.11315	HY
986	GO:0098856	intestinal lipid absorption	1	1	0.11	2009	0.11315	1	HY
987	GO:0098920	retrograde trans-synaptic signaling by l...	1	1	0.11	2010	0.11315	1	HY
988	GO:0098921	retrograde trans-synaptic signaling by e...	1	1	0.11	373	0.11315	0.11315	HY
989	GO:0099533	positive regulation of presynaptic cytos...	1	1	0.11	374	0.11315	0.11315	HY
990	GO:0099541	trans-synaptic signaling by lipid	1	1	0.11	2011	0.11315	1	HY
991	GO:0099542	trans-synaptic signaling by endocannabin...	1	1	0.11	2012	0.11315	1	HY
992	GO:0110077	vesicle-mediated intercellular transport	1	1	0.11	375	0.11315	0.11315	HY
993	GO:0120142	positive regulation of ecdysone receptor...	1	1	0.11	376	0.11315	0.11315	HY
994	GO:0140042	lipid droplet formation	1	1	0.11	377	0.11315	0.11315	HY
995	GO:1900060	negative regulation of ceramide biosynth...	1	1	0.11	378	0.11315	0.11315	HY
996	GO:1900102	negative regulation of endoplasmic retic...	1	1	0.11	379	0.11315	0.11315	HY
997	GO:1900103	positive regulation of endoplasmic retic...	1	1	0.11	380	0.11315	0.11315	HY
998	GO:1900186	negative regulation of clathrin-dependen...	1	1	0.11	381	0.11315	0.11315	HY
999	GO:1901004	ubiquinone-6 metabolic process	1	1	0.11	2013	0.11315	1	HY
1000	GO:1901006	ubiquinone-6 biosynthetic process	1	1	0.11	382	0.11315	0.11315	HY
1	GO:0065007	biological regulation	4400	874	504.88	2472	< 1e-30	1	HS
2	GO:0050789	regulation of biological process	3935	816	451.52	2473	< 1e-30	1	HS
3	GO:0048731	system development	1772	497	203.33	2474	< 1e-30	1	HS
4	GO:0050794	regulation of cellular process	3619	761	415.27	2475	< 1e-30	1	HS
5	GO:0032502	developmental process	2867	643	328.98	2476	< 1e-30	1	HS
6	GO:0048856	anatomical structure development	2765	628	317.27	649	< 1e-30	0.05555	HS
7	GO:0007275	multicellular organism development	2414	574	277	1965	< 1e-30	0.44133	HS
8	GO:0048468	cell development	1424	410	163.4	2477	< 1e-30	1	HS
12	GO:0048513	animal organ development	1219	364	139.88	2480	< 1e-30	1	HS
10	GO:0048869	cellular developmental process	1726	459	198.05	2478	< 1e-30	1	HS
11	GO:0071840	cellular component organization or bioge...	3123	660	358.35	2479	< 1e-30	1	HS
21	GO:0009888	tissue development	1071	311	122.89	2215	< 1e-30	0.60262	HS
13	GO:0007399	nervous system development	1122	342	128.74	139	< 1e-30	0.00042	HS
14	GO:0048518	positive regulation of biological proces�	1676	429	192.31	2481	< 1e-30	1	HS
15	GO:0009653	anatomical structure morphogenesis	1558	408	178.77	1818	< 1e-30	0.37746	HS
16	GO:0016043	cellular component organization	2968	616	340.57	2482	< 1e-30	1	HS
17	GO:0048519	negative regulation of biological proces...	1514	397	173.73	2483	< 1e-30	1	HS
18	GO:0009987	cellular process	7970	1174	914.52	2484	< 1e-30	1	HS
19	GO:0022008	neurogenesis	910	284	104.42	2270	< 1e-30	0.64539	HS
20	GO:0048522	positive regulation of cellular process	1504	388	172.58	2485	< 1e-30	1	HS
38	GO:0023052	signaling	1703	393	195.41	1255	< 1e-30	0.18187	HS
22	GO:0060255	regulation of macromolecule metabolic pr...	2067	473	237.18	2486	< 1e-30	1	HS
23	GO:0048699	generation of neurons	865	271	99.26	2487	< 1e-30	1	HS
46	GO:0007165	signal transduction	1469	347	168.56	422	< 1e-30	0.01605	HS
25	GO:0048523	negative regulation of cellular process	1293	346	148.37	2489	< 1e-30	1	HS
26	GO:0060429	epithelium development	980	289	112.45	1578	< 1e-30	0.2678	HS
27	GO:0030182	neuron differentiation	778	247	89.27	2422	< 1e-30	0.90291	HS
28	GO:0051128	regulation of cellular component organiz...	838	258	96.16	2490	< 1e-30	1	HS
29	GO:0009887	animal organ morphogenesis	762	243	87.44	719	< 1e-30	0.07181	HS
30	GO:0032501	multicellular organismal process	3649	679	418.71	2491	< 1e-30	1	HS
31	GO:0031323	regulation of cellular metabolic process	2018	453	231.56	2492	< 1e-30	1	HS
32	GO:0050896	response to stimulus	2941	584	337.47	2493	< 1e-30	1	HS
33	GO:0051171	regulation of nitrogen compound metaboli...	1909	434	219.05	2494	< 1e-30	1	HS
34	GO:0080090	regulation of primary metabolic process	1930	434	221.46	2495	< 1e-30	1	HS
35	GO:0035295	tube development	723	229	82.96	2496	< 1e-30	1	HS
36	GO:0048666	neuron development	622	209	71.37	648	< 1e-30	0.05493	HS
37	GO:0010468	regulation of gene expression	1612	380	184.97	421	< 1e-30	0.01604	HS
24	GO:0019222	regulation of metabolic process	2234	496	256.34	2488	< 1e-30	1	HS
39	GO:0007154	cell communication	1745	397	200.23	2497	< 1e-30	1	HS
40	GO:0007444	imaginal disc development	575	195	65.98	414	< 1e-30	0.01427	HS
41	GO:0032989	cellular component morphogenesis	698	219	80.09	2498	< 1e-30	1	HS
42	GO:0051716	cellular response to stimulus	1931	423	221.57	2499	< 1e-30	1	HS
43	GO:0040011	locomotion	660	209	75.73	2209	< 1e-30	0.59636	HS
44	GO:0048729	tissue morphogenesis	619	200	71.03	2500	< 1e-30	1	HS
45	GO:0000902	cell morphogenesis	569	190	65.29	231	< 1e-30	0.00341	HS
451	GO:0006417	regulation of translation	153	47	17.56	1789	1.00E-10	0.32928	HS
47	GO:0051704	multi-organism process	1441	342	165.35	2501	< 1e-30	1	HS
48	GO:0051239	regulation of multicellular organismal p...	771	226	88.47	2502	< 1e-30	1	HS
49	GO:0002009	morphogenesis of an epithelium	601	192	68.96	1956	< 1e-30	0.42232	HS
50	GO:0016477	cell migration	307	129	35.23	13	< 1e-30	3.40E-08	HS
51	GO:0050793	regulation of developmental process	761	222	87.32	2503	< 1e-30	1	HS
52	GO:0044085	cellular component biogenesis	1454	338	166.84	2504	< 1e-30	1	HS
53	GO:0003006	developmental process involved in reprod...	834	233	95.7	2505	< 1e-30	1	HS
54	GO:0022412	cellular process involved in reproductio...	868	239	99.6	2506	< 1e-30	1	HS
55	GO:0006928	movement of cell or subcellular componen...	729	213	83.65	2507	< 1e-30	1	HS
543	GO:0017148	negative regulation of translation	68	26	7.8	23	1.00E-08	2.20E-07	HS
57	GO:0048583	regulation of response to stimulus	962	254	110.39	2509	< 1e-30	1	HS
58	GO:0000904	cell morphogenesis involved in different...	490	165	56.23	2510	< 1e-30	1	HS
59	GO:0090304	nucleic acid metabolic process	2193	443	251.64	2511	< 1e-30	1	HS
60	GO:0016070	RNA metabolic process	1955	408	224.33	2340	< 1e-30	0.75788	HS
61	GO:0031326	regulation of cellular biosynthetic proc...	1389	322	159.38	2512	< 1e-30	1	HS
62	GO:0010556	regulation of macromolecule biosynthetic...	1340	314	153.76	2513	< 1e-30	1	HS
63	GO:0010646	regulation of cell communication	878	237	100.75	2514	< 1e-30	1	HS
64	GO:2000112	regulation of cellular macromolecule bio...	1334	313	153.07	2515	< 1e-30	1	HS
65	GO:0009889	regulation of biosynthetic process	1393	322	159.84	2516	< 1e-30	1	HS
66	GO:0009791	post-embryonic development	634	192	72.75	2517	< 1e-30	1	HS
67	GO:0023051	regulation of signaling	882	237	101.21	2518	< 1e-30	1	HS
68	GO:0007276	gamete generation	963	251	110.5	2519	< 1e-30	1	HS
69	GO:0048870	cell motility	356	135	40.85	2520	< 1e-30	1	HS
70	GO:0051674	localization of cell	361	136	41.42	2521	< 1e-30	1	HS
71	GO:0007281	germ cell development	734	210	84.22	197	< 1e-30	0.00157	HS
72	GO:0019219	regulation of nucleobase-containing comp...	1370	316	157.2	2522	< 1e-30	1	HS
73	GO:0051252	regulation of RNA metabolic process	1301	305	149.28	2139	< 1e-30	0.52223	HS
74	GO:0007010	cytoskeleton organization	643	192	73.78	597	< 1e-30	0.03928	HS
75	GO:0022414	reproductive process	1226	292	140.68	2523	< 1e-30	1	HS
76	GO:0007292	female gamete generation	653	193	74.93	834	< 1e-30	0.10435	HS
77	GO:0048609	multicellular organismal reproductive pr...	1094	270	125.53	2524	< 1e-30	1	HS
78	GO:0019953	sexual reproduction	1094	269	125.53	2525	< 1e-30	1	HS
79	GO:0044703	multi-organism reproductive process	1094	269	125.53	2526	< 1e-30	1	HS
80	GO:0031175	neuron projection development	482	158	55.31	504	< 1e-30	0.02995	HS
81	GO:0009886	post-embryonic animal morphogenesis	463	154	53.13	2527	< 1e-30	1	HS
82	GO:0048477	oogenesis	601	181	68.96	1241	< 1e-30	0.16858	HS
83	GO:0048569	post-embryonic animal organ development	465	154	53.36	2528	< 1e-30	1	HS
84	GO:0032879	regulation of localization	510	163	58.52	2320	< 1e-30	0.70709	HS
85	GO:0009893	positive regulation of metabolic process	928	239	106.48	2529	< 1e-30	1	HS
86	GO:0009790	embryo development	537	168	61.62	2530	< 1e-30	1	HS
87	GO:0048707	instar larval or pupal morphogenesis	447	150	51.29	2531	< 1e-30	1	HS
88	GO:0010604	positive regulation of macromolecule met...	832	222	95.47	2532	< 1e-30	1	HS
89	GO:0007552	metamorphosis	475	155	54.5	1242	< 1e-30	0.16978	HS
90	GO:2000026	regulation of multicellular organismal d...	588	177	67.47	2533	< 1e-30	1	HS
91	GO:0009966	regulation of signal transduction	757	208	86.86	2207	< 1e-30	0.58439	HS
92	GO:0048667	cell morphogenesis involved in neuron di...	447	149	51.29	2534	< 1e-30	1	HS
93	GO:0051179	localization	2370	456	271.95	2535	< 1e-30	1	HS
94	GO:0002165	instar larval or pupal development	560	171	64.26	1302	< 1e-30	0.20323	HS
95	GO:0006996	organelle organization	1993	402	228.69	2536	< 1e-30	1	HS
96	GO:0048858	cell projection morphogenesis	451	149	51.75	2537	< 1e-30	1	HS
97	GO:0120039	plasma membrane bounded cell projection ...	451	149	51.75	2538	< 1e-30	1	HS
98	GO:0048812	neuron projection morphogenesis	449	148	51.52	2539	< 1e-30	1	HS
99	GO:0032990	cell part morphogenesis	459	150	52.67	2540	< 1e-30	1	HS
100	GO:0035239	tube morphogenesis	510	160	58.52	2070	< 1e-30	0.48915	HS
101	GO:0051173	positive regulation of nitrogen compound...	809	215	92.83	2541	< 1e-30	1	HS
102	GO:0031325	positive regulation of cellular metaboli...	863	223	99.03	2542	< 1e-30	1	HS
103	GO:0001667	ameboidal-type cell migration	189	88	21.69	2543	< 1e-30	1	HS
104	GO:0060562	epithelial tube morphogenesis	465	149	53.36	2544	< 1e-30	1	HS
105	GO:0035220	wing disc development	386	132	44.29	26	< 1e-30	3.10E-07	HS
106	GO:0030030	cell projection organization	690	190	79.17	2545	< 1e-30	1	HS
107	GO:0048589	developmental growth	369	128	42.34	1608	< 1e-30	0.28883	HS
108	GO:0030855	epithelial cell differentiation	403	135	46.24	2546	< 1e-30	1	HS
109	GO:0022607	cellular component assembly	1282	288	147.1	2547	< 1e-30	1	HS
110	GO:0010631	epithelial cell migration	168	81	19.28	2548	< 1e-30	1	HS
111	GO:0065008	regulation of biological quality	1357	299	155.71	2549	< 1e-30	1	HS
112	GO:0009605	response to external stimulus	969	237	111.19	2550	< 1e-30	1	HS
113	GO:0090132	epithelium migration	169	81	19.39	2551	< 1e-30	1	HS
114	GO:0090130	tissue migration	177	83	20.31	2552	< 1e-30	1	HS
115	GO:0007166	cell surface receptor signaling pathway	687	188	78.83	1796	< 1e-30	0.34812	HS
116	GO:0006355	regulation of transcription, DNA-templat...	1159	267	132.99	651	< 1e-30	0.05594	HS
117	GO:1903506	regulation of nucleic acid-templated tra...	1159	267	132.99	2553	< 1e-30	1	HS
118	GO:2001141	regulation of RNA biosynthetic process	1159	267	132.99	2554	< 1e-30	1	HS
119	GO:0002064	epithelial cell development	346	122	39.7	2555	< 1e-30	1	HS
120	GO:0030029	actin filament-based process	314	115	36.03	2556	< 1e-30	1	HS
121	GO:0043170	macromolecule metabolic process	4928	769	565.47	2557	< 1e-30	1	HS
122	GO:0120036	plasma membrane bounded cell projection ...	679	186	77.91	2558	< 1e-30	1	HS
123	GO:0007560	imaginal disc morphogenesis	395	132	45.32	748	< 1e-30	0.0924	HS
124	GO:0048563	post-embryonic animal organ morphogenesi...	395	132	45.32	2559	< 1e-30	1	HS
125	GO:0030036	actin cytoskeleton organization	300	111	34.42	27	< 1e-30	5.30E-07	HS
126	GO:0061564	axon development	352	122	40.39	2560	< 1e-30	1	HS
127	GO:0006950	response to stress	1249	279	143.32	2561	< 1e-30	1	HS
128	GO:0035556	intracellular signal transduction	659	181	75.62	281	< 1e-30	0.00765	HS
129	GO:0002065	columnar/cuboidal epithelial cell differ...	330	117	37.87	2562	< 1e-30	1	HS
130	GO:0006351	transcription, DNA-templated	1251	278	143.55	580	< 1e-30	0.03678	HS
131	GO:0097659	nucleic acid-templated transcription	1251	278	143.55	2563	< 1e-30	1	HS
132	GO:0032774	RNA biosynthetic process	1254	278	143.89	2564	1.10E-30	1	HS
133	GO:0030707	ovarian follicle cell development	314	112	36.03	240	3.60E-30	0.0044	HS
134	GO:0002066	columnar/cuboidal epithelial cell develo...	315	112	36.14	2565	5.00E-30	1	HS
135	GO:0009892	negative regulation of metabolic process	886	217	101.66	2566	6.70E-30	1	HS
136	GO:0010467	gene expression	2808	496	322.21	2567	1.20E-29	1	HS
137	GO:0006725	cellular aromatic compound metabolic pro...	2695	480	309.24	2568	2.30E-29	1	HS
138	GO:0007409	axonogenesis	339	116	38.9	73	2.40E-29	2.60E-05	HS
217	GO:0080134	regulation of response to stress	294	93	33.74	2619	6.20E-21	1	HS
140	GO:1901360	organic cyclic compound metabolic proces...	2749	485	315.44	2570	1.10E-28	1	HS
141	GO:0044260	cellular macromolecule metabolic process	3806	620	436.72	2571	2.10E-28	1	HS
142	GO:0006139	nucleobase-containing compound metabolic...	2568	459	294.67	2572	4.00E-28	1	HS
279	GO:0000278	mitotic cell cycle	495	120	56.8	750	3.00E-16	0.09454	HS
144	GO:0000003	reproduction	1443	299	165.58	2573	1.00E-27	1	HS
145	GO:0007297	ovarian follicle cell migration	134	66	15.38	717	1.30E-27	0.06812	HS
146	GO:0002376	immune system process	450	135	51.64	2574	1.70E-27	1	HS
147	GO:0048646	anatomical structure formation involved ...	542	152	62.19	2575	2.10E-27	1	HS
148	GO:0032504	multicellular organism reproduction	1314	278	150.78	2468	3.90E-27	0.99997	HS
149	GO:0048737	imaginal disc-derived appendage developm...	337	112	38.67	1303	4.30E-27	0.20521	HS
150	GO:0007389	pattern specification process	518	147	59.44	2576	4.30E-27	1	HS
151	GO:0006357	regulation of transcription by RNA polym...	748	187	85.83	19	7.80E-27	1.10E-07	HS
152	GO:0048736	appendage development	340	112	39.01	2577	1.00E-26	1	HS
153	GO:0033043	regulation of organelle organization	428	129	49.11	2578	1.70E-26	1	HS
154	GO:1902531	regulation of intracellular signal trans...	347	113	39.82	2579	1.80E-26	1	HS
155	GO:0010629	negative regulation of gene expression	672	173	77.11	230	2.20E-26	0.00303	HS
156	GO:0007423	sensory organ development	490	140	56.23	248	3.90E-26	0.00473	HS
157	GO:0034654	nucleobase-containing compound biosynthe...	1470	298	168.68	2580	6.40E-26	1	HS
158	GO:0042330	taxis	357	114	40.96	2581	7.20E-26	1	HS
159	GO:0044087	regulation of cellular component biogene...	333	109	38.21	2582	9.20E-26	1	HS
160	GO:0046483	heterocycle metabolic process	2642	461	303.16	2583	9.20E-26	1	HS
287	GO:0012501	programmed cell death	333	91	38.21	2668	6.30E-16	1	HS
162	GO:0007298	border follicle cell migration	121	60	13.88	2	2.10E-25	1.70E-13	HS
163	GO:0023057	negative regulation of signaling	361	114	41.42	2584	2.10E-25	1	HS
164	GO:0048598	embryonic morphogenesis	241	89	27.65	1964	2.20E-25	0.44019	HS
165	GO:0051960	regulation of nervous system development	368	115	42.23	2585	3.50E-25	1	HS
166	GO:0051246	regulation of protein metabolic process	625	162	71.72	2586	4.80E-25	1	HS
167	GO:0006366	transcription by RNA polymerase II	791	190	90.76	2403	5.60E-25	0.86648	HS
168	GO:0010628	positive regulation of gene expression	558	150	64.03	145	6.00E-25	0.00053	HS
169	GO:0010648	negative regulation of cell communicatio...	360	113	41.31	2587	6.20E-25	1	HS
170	GO:0032268	regulation of cellular protein metabolic...	598	157	68.62	2588	6.50E-25	1	HS
171	GO:0035120	post-embryonic appendage morphogenesis	321	105	36.83	2589	8.10E-25	1	HS
172	GO:0001700	embryonic development via the syncytial ...	173	72	19.85	415	2.30E-24	0.01441	HS
173	GO:0035114	imaginal disc-derived appendage morphoge...	330	106	37.87	2590	2.50E-24	1	HS
174	GO:0007472	wing disc morphogenesis	287	97	32.93	277	3.40E-24	0.00697	HS
175	GO:0035107	appendage morphogenesis	332	106	38.1	2591	4.30E-24	1	HS
176	GO:0001654	eye development	399	119	45.78	154	4.70E-24	0.00064	HS
177	GO:0048880	sensory system development	399	119	45.78	2592	4.70E-24	1	HS
178	GO:0150063	visual system development	399	119	45.78	2593	4.70E-24	1	HS
179	GO:0097435	supramolecular fiber organization	255	90	29.26	2594	5.00E-24	1	HS
180	GO:0044237	cellular metabolic process	5538	810	635.46	2595	6.00E-24	1	HS
181	GO:0048584	positive regulation of response to stimu...	508	139	58.29	2596	6.00E-24	1	HS
724	GO:0006914	autophagy	185	44	21.23	1958	1.60E-06	0.42822	HS
183	GO:0006468	protein phosphorylation	433	125	49.68	483	7.90E-24	0.02628	HS
184	GO:0019438	aromatic compound biosynthetic process	1533	301	175.91	2598	8.50E-24	1	HS
185	GO:0031324	negative regulation of cellular metaboli...	706	173	81.01	2599	9.30E-24	1	HS
186	GO:0060284	regulation of cell development	356	110	40.85	2600	1.10E-23	1	HS
187	GO:0048585	negative regulation of response to stimu...	383	115	43.95	2601	1.50E-23	1	HS
188	GO:0060541	respiratory system development	255	89	29.26	2602	2.20E-23	1	HS
189	GO:0009792	embryo development ending in birth or eg...	183	73	21	2302	2.30E-23	0.68941	HS
190	GO:0007424	open tracheal system development	246	87	28.23	17	2.50E-23	9.40E-08	HS
191	GO:0045165	cell fate commitment	329	104	37.75	432	2.80E-23	0.01699	HS
192	GO:0045595	regulation of cell differentiation	428	123	49.11	661	2.90E-23	0.06491	HS
193	GO:0007476	imaginal disc-derived wing morphogenesis	275	93	31.56	37	3.00E-23	1.90E-06	HS
194	GO:0018130	heterocycle biosynthetic process	1540	300	176.71	2603	3.90E-23	1	HS
195	GO:0042221	response to chemical	1196	249	137.24	2604	4.40E-23	1	HS
196	GO:0006935	chemotaxis	296	97	33.96	2605	4.60E-23	1	HS
197	GO:1901362	organic cyclic compound biosynthetic pro...	1577	305	180.95	2606	5.10E-23	1	HS
198	GO:0003002	regionalization	478	131	54.85	2607	1.20E-22	1	HS
199	GO:0048732	gland development	188	73	21.57	2608	1.60E-22	1	HS
200	GO:0009968	negative regulation of signal transducti...	331	103	37.98	2216	1.80E-22	0.60343	HS
201	GO:0097485	neuron projection guidance	287	94	32.93	2609	2.30E-22	1	HS
202	GO:0051172	negative regulation of nitrogen compound...	661	162	75.85	2610	2.90E-22	1	HS
203	GO:0007167	enzyme linked receptor protein signaling...	293	95	33.62	2611	3.20E-22	1	HS
204	GO:0010557	positive regulation of macromolecule bio...	517	137	59.32	2612	3.50E-22	1	HS
750	GO:0010506	regulation of autophagy	109	30	12.51	280	3.20E-06	0.00765	HS
206	GO:0009891	positive regulation of biosynthetic proc...	558	144	64.03	2613	4.30E-22	1	HS
207	GO:0031328	positive regulation of cellular biosynth...	558	144	64.03	2614	4.30E-22	1	HS
208	GO:0007169	transmembrane receptor protein tyrosine ...	227	81	26.05	1243	4.50E-22	0.1716	HS
209	GO:0048749	compound eye development	377	111	43.26	456	5.50E-22	0.0221	HS
210	GO:0016331	morphogenesis of embryonic epithelium	121	56	13.88	2077	6.20E-22	0.50712	HS
211	GO:0051240	positive regulation of multicellular org...	302	96	34.65	2615	9.40E-22	1	HS
212	GO:0051641	cellular localization	1060	224	121.63	2616	1.50E-21	1	HS
213	GO:0048592	eye morphogenesis	325	100	37.29	2617	1.90E-21	1	HS
214	GO:0090596	sensory organ morphogenesis	325	100	37.29	2618	1.90E-21	1	HS
215	GO:0001745	compound eye morphogenesis	311	97	35.69	181	2.70E-21	0.00121	HS
216	GO:0007411	axon guidance	278	90	31.9	4	4.60E-21	6.10E-13	HS
161	GO:0008283	cell proliferation	314	105	36.03	2271	1.10E-25	0.64552	HS
218	GO:0051254	positive regulation of RNA metabolic pro...	487	129	55.88	2620	6.60E-21	1	HS
219	GO:0045893	positive regulation of transcription, DN...	461	124	52.9	90	9.90E-21	5.60E-05	HS
220	GO:1902680	positive regulation of RNA biosynthetic ...	461	124	52.9	2621	9.90E-21	1	HS
221	GO:1903508	positive regulation of nucleic acid-temp...	461	124	52.9	2622	9.90E-21	1	HS
222	GO:0007610	behavior	567	142	65.06	2623	1.80E-20	1	HS
223	GO:0045935	positive regulation of nucleobase-contai...	519	133	59.55	2624	3.70E-20	1	HS
224	GO:0007431	salivary gland development	126	55	14.46	416	4.50E-20	0.0145	HS
225	GO:0035272	exocrine system development	126	55	14.46	2625	4.50E-20	1	HS
226	GO:0030334	regulation of cell migration	81	43	9.29	196	4.70E-20	0.00151	HS
227	GO:0046530	photoreceptor cell differentiation	219	76	25.13	1305	5.90E-20	0.20874	HS
228	GO:0051130	positive regulation of cellular componen...	329	98	37.75	2626	6.50E-20	1	HS
229	GO:0021700	developmental maturation	211	74	24.21	2627	9.20E-20	1	HS
230	GO:0010558	negative regulation of macromolecule bio...	486	126	55.77	2628	1.40E-19	1	HS
231	GO:2000113	negative regulation of cellular macromol...	486	126	55.77	2629	1.40E-19	1	HS
182	GO:0007049	cell cycle	752	181	86.29	2597	6.80E-24	1	HS
233	GO:0051094	positive regulation of developmental pro...	297	91	34.08	2630	1.80E-19	1	HS
234	GO:0007163	establishment or maintenance of cell pol...	206	72	23.64	1625	3.60E-19	0.3055	HS
235	GO:0009967	positive regulation of signal transducti...	396	109	45.44	2631	3.90E-19	1	HS
236	GO:0051129	negative regulation of cellular componen...	166	63	19.05	2632	5.30E-19	1	HS
237	GO:2000145	regulation of cell motility	85	43	9.75	2633	5.30E-19	1	HS
238	GO:0010647	positive regulation of cell communicatio...	431	115	49.46	2634	5.50E-19	1	HS
239	GO:0023056	positive regulation of signaling	431	115	49.46	2635	5.50E-19	1	HS
240	GO:0048469	cell maturation	180	66	20.65	2636	6.40E-19	1	HS
241	GO:0006955	immune response	298	90	34.19	1822	8.40E-19	0.38033	HS
242	GO:0009890	negative regulation of biosynthetic proc...	502	127	57.6	2637	9.00E-19	1	HS
243	GO:0031327	negative regulation of cellular biosynth...	502	127	57.6	2638	9.00E-19	1	HS
244	GO:0051049	regulation of transport	294	89	33.74	2639	1.10E-18	1	HS
245	GO:0007417	central nervous system development	266	83	30.52	253	2.20E-18	0.00515	HS
246	GO:0043412	macromolecule modification	1417	267	162.59	2640	2.50E-18	1	HS
247	GO:0048638	regulation of developmental growth	232	76	26.62	2641	2.70E-18	1	HS
248	GO:0010033	response to organic substance	556	135	63.8	2642	3.00E-18	1	HS
249	GO:0006464	cellular protein modification process	1316	252	151.01	2643	3.40E-18	1	HS
250	GO:0036211	protein modification process	1316	252	151.01	2644	3.40E-18	1	HS
251	GO:0033036	macromolecule localization	947	197	108.66	2645	4.10E-18	1	HS
252	GO:0051270	regulation of cellular component movemen...	121	51	13.88	2646	6.60E-18	1	HS
205	GO:0042127	regulation of cell proliferation	222	80	25.47	620	3.90E-22	0.05039	HS
254	GO:0071704	organic substance metabolic process	6039	840	692.95	2648	1.40E-17	1	HS
255	GO:0007435	salivary gland morphogenesis	95	44	10.9	11	1.60E-17	5.00E-09	HS
256	GO:0022612	gland morphogenesis	95	44	10.9	2649	1.60E-17	1	HS
257	GO:0051276	chromosome organization	739	163	84.8	746	1.60E-17	0.0857	HS
258	GO:0040012	regulation of locomotion	119	50	13.65	2079	1.60E-17	0.50875	HS
259	GO:0031399	regulation of protein modification proce...	332	94	38.1	2650	1.60E-17	1	HS
260	GO:0033044	regulation of chromosome organization	167	61	19.16	2651	1.70E-17	1	HS
261	GO:0051093	negative regulation of developmental pro...	195	67	22.38	2652	1.80E-17	1	HS
262	GO:0009059	macromolecule biosynthetic process	2353	392	270	2653	1.80E-17	1	HS
263	GO:0043900	regulation of multi-organism process	186	65	21.34	2654	2.00E-17	1	HS
264	GO:0009719	response to endogenous stimulus	286	85	32.82	2655	2.40E-17	1	HS
265	GO:0051493	regulation of cytoskeleton organization	168	61	19.28	450	2.40E-17	0.02128	HS
266	GO:0006952	defense response	417	109	47.85	2058	2.50E-17	0.46331	HS
267	GO:0097305	response to alcohol	125	51	14.34	1968	3.50E-17	0.44689	HS
268	GO:0001932	regulation of protein phosphorylation	218	71	25.01	2075	5.20E-17	0.50592	HS
269	GO:0006807	nitrogen compound metabolic process	5426	767	622.61	2656	5.90E-17	1	HS
270	GO:0034645	cellular macromolecule biosynthetic proc...	2328	386	267.13	2657	8.40E-17	1	HS
271	GO:0050803	regulation of synapse structure or activ...	192	65	22.03	167	1.30E-16	0.00097	HS
272	GO:0007416	synapse assembly	174	61	19.97	609	1.70E-16	0.0425	HS
273	GO:0007611	learning or memory	165	59	18.93	324	1.90E-16	0.01164	HS
274	GO:0050890	cognition	165	59	18.93	2658	1.90E-16	1	HS
275	GO:0051247	positive regulation of protein metabolic...	295	85	33.85	2659	1.90E-16	1	HS
276	GO:0061061	muscle structure development	218	70	25.01	2660	2.00E-16	1	HS
277	GO:0022402	cell cycle process	589	136	67.59	2661	2.00E-16	1	HS
278	GO:0022603	regulation of anatomical structure morph...	265	79	30.41	2662	2.80E-16	1	HS
377	GO:0072089	stem cell proliferation	111	41	12.74	454	2.20E-12	0.02189	HS
280	GO:0030335	positive regulation of cell migration	57	32	6.54	218	3.30E-16	0.00276	HS
281	GO:0023014	signal transduction by protein phosphory...	144	54	16.52	511	3.30E-16	0.03449	HS
282	GO:0010720	positive regulation of cell development	177	61	20.31	2663	4.30E-16	1	HS
283	GO:0051253	negative regulation of RNA metabolic pro...	427	108	49	2664	4.40E-16	1	HS
284	GO:0051656	establishment of organelle localization	211	68	24.21	2665	4.40E-16	1	HS
285	GO:0010632	regulation of epithelial cell migration	51	30	5.85	2666	4.80E-16	1	HS
286	GO:0051241	negative regulation of multicellular org...	183	62	21	2667	6.20E-16	1	HS
438	GO:0019827	stem cell population maintenance	103	37	11.82	325	6.80E-11	0.01202	HS
288	GO:0042325	regulation of phosphorylation	259	77	29.72	2339	7.90E-16	0.75538	HS
289	GO:0033554	cellular response to stress	613	138	70.34	2669	1.10E-15	1	HS
290	GO:0051301	cell division	271	79	31.1	2670	1.10E-15	1	HS
291	GO:0045934	negative regulation of nucleobase-contai...	450	111	51.64	2671	1.10E-15	1	HS
292	GO:0007015	actin filament organization	162	57	18.59	14	1.40E-15	4.60E-08	HS
293	GO:0007267	cell-cell signaling	500	119	57.37	2672	1.70E-15	1	HS
294	GO:1901700	response to oxygen-containing compound	355	94	40.73	2673	1.80E-15	1	HS
295	GO:0090066	regulation of anatomical structure size	242	73	27.77	2674	1.90E-15	1	HS
296	GO:0051640	organelle localization	269	78	30.87	2675	2.40E-15	1	HS
297	GO:0044271	cellular nitrogen compound biosynthetic ...	2360	384	270.8	2676	2.50E-15	1	HS
298	GO:0032270	positive regulation of cellular protein ...	280	80	32.13	2677	2.60E-15	1	HS
567	GO:0017145	stem cell division	100	32	11.47	1615	3.40E-08	0.30231	HS
300	GO:0008219	cell death	388	99	44.52	2321	4.30E-15	0.72266	HS
301	GO:0001738	morphogenesis of a polarized epithelium	116	46	13.31	453	4.50E-15	0.02169	HS
302	GO:2000147	positive regulation of cell motility	61	32	7	2678	4.50E-15	1	HS
303	GO:0007155	cell adhesion	210	66	24.1	505	4.90E-15	0.03026	HS
304	GO:0044089	positive regulation of cellular componen...	152	54	17.44	2679	4.90E-15	1	HS
305	GO:0002682	regulation of immune system process	231	70	26.51	2680	5.70E-15	1	HS
306	GO:0050767	regulation of neurogenesis	273	78	31.33	2337	5.80E-15	0.74022	HS
307	GO:0050808	synapse organization	300	83	34.42	2140	5.80E-15	0.52394	HS
308	GO:0045892	negative regulation of transcription, DN...	408	102	46.82	134	6.90E-15	0.00035	HS
309	GO:1902679	negative regulation of RNA biosynthetic ...	408	102	46.82	2681	6.90E-15	1	HS
310	GO:1903507	negative regulation of nucleic acid-temp...	408	102	46.82	2682	6.90E-15	1	HS
311	GO:0051649	establishment of localization in cell	833	170	95.58	2683	7.40E-15	1	HS
312	GO:0044238	primary metabolic process	5630	780	646.02	2684	7.90E-15	1	HS
313	GO:0001754	eye photoreceptor cell differentiation	197	63	22.6	2685	8.20E-15	1	HS
314	GO:0048565	digestive tract development	109	44	12.51	1314	8.30E-15	0.21172	HS
315	GO:0055123	digestive system development	109	44	12.51	2686	8.30E-15	1	HS
316	GO:0040017	positive regulation of locomotion	77	36	8.84	1317	9.60E-15	0.21238	HS
317	GO:0034641	cellular nitrogen compound metabolic pro...	3460	521	397.02	2687	1.00E-14	1	HS
318	GO:0051124	synaptic growth at neuromuscular junctio...	141	51	16.18	329	1.20E-14	0.0122	HS
319	GO:0045597	positive regulation of cell differentiat...	189	61	21.69	2688	1.40E-14	1	HS
320	GO:0050807	regulation of synapse organization	160	55	18.36	1959	1.40E-14	0.43502	HS
321	GO:0051963	regulation of synapse assembly	119	46	13.65	2689	1.40E-14	1	HS
322	GO:0045944	positive regulation of transcription by ...	349	91	40.05	5	1.40E-14	1.30E-12	HS
323	GO:0001751	compound eye photoreceptor cell differen...	190	61	21.8	1300	1.80E-14	0.20066	HS
324	GO:1903688	positive regulation of border follicle c...	40	25	4.59	1	1.80E-14	1.80E-14	HS
325	GO:0008152	metabolic process	6384	863	732.54	2690	2.40E-14	1	HS
326	GO:0009725	response to hormone	172	57	19.74	2691	2.80E-14	1	HS
327	GO:0071495	cellular response to endogenous stimulus	254	73	29.15	2692	3.20E-14	1	HS
328	GO:0048813	dendrite morphogenesis	163	55	18.7	6	3.40E-14	1.40E-11	HS
329	GO:0022610	biological adhesion	218	66	25.01	2693	3.70E-14	1	HS
330	GO:0016358	dendrite development	178	58	20.42	1967	3.90E-14	0.4466	HS
331	GO:0010634	positive regulation of epithelial cell m...	41	25	4.7	2694	4.20E-14	1	HS
332	GO:1903684	regulation of border follicle cell migra...	41	25	4.7	2695	4.20E-14	1	HS
333	GO:0002164	larval development	169	56	19.39	1526	4.80E-14	0.22237	HS
334	GO:1905881	positive regulation of oogenesis	48	27	5.51	2696	6.50E-14	1	HS
335	GO:0007528	neuromuscular junction development	180	58	20.65	1235	6.70E-14	0.15644	HS
336	GO:0060560	developmental growth involved in morphog...	106	42	12.16	2697	7.30E-14	1	HS
337	GO:0071310	cellular response to organic substance	341	88	39.13	2698	7.60E-14	1	HS
338	GO:0030856	regulation of epithelial cell differenti...	45	26	5.16	2699	7.90E-14	1	HS
339	GO:1902275	regulation of chromatin organization	115	44	13.2	333	8.20E-14	0.0126	HS
340	GO:0016310	phosphorylation	620	134	71.14	2700	8.50E-14	1	HS
341	GO:0065009	regulation of molecular function	459	108	52.67	2701	8.50E-14	1	HS
342	GO:0008582	regulation of synaptic growth at neuromu...	112	43	12.85	87	1.40E-13	5.00E-05	HS
343	GO:0070887	cellular response to chemical stimulus	450	106	51.64	2702	1.40E-13	1	HS
344	GO:0051234	establishment of localization	1850	309	212.28	2703	1.40E-13	1	HS
345	GO:1905879	regulation of oogenesis	75	34	8.61	2704	1.70E-13	1	HS
346	GO:0051272	positive regulation of cellular componen...	79	35	9.06	2705	1.70E-13	1	HS
347	GO:0030858	positive regulation of epithelial cell d...	43	25	4.93	2706	2.00E-13	1	HS
348	GO:0007613	memory	122	45	14	635	2.00E-13	0.05404	HS
349	GO:0043408	regulation of MAPK cascade	122	45	14	2707	2.00E-13	1	HS
350	GO:0006325	chromatin organization	514	116	58.98	2073	2.10E-13	0.49562	HS
351	GO:1904396	regulation of neuromuscular junction dev...	118	44	13.54	1820	2.40E-13	0.37883	HS
352	GO:0031098	stress-activated protein kinase signalin...	88	37	10.1	486	2.50E-13	0.02766	HS
353	GO:0022613	ribonucleoprotein complex biogenesis	308	81	35.34	2708	2.60E-13	1	HS
354	GO:0009611	response to wounding	132	47	15.15	618	2.70E-13	0.04934	HS
355	GO:0048663	neuron fate commitment	98	39	11.25	1970	4.80E-13	0.44925	HS
356	GO:0008104	protein localization	765	154	87.78	237	5.20E-13	0.00418	HS
357	GO:0031401	positive regulation of protein modificat...	168	54	19.28	2709	5.50E-13	1	HS
358	GO:1902533	positive regulation of intracellular sig...	178	56	20.42	2710	5.60E-13	1	HS
359	GO:0019220	regulation of phosphate metabolic proces...	301	79	34.54	2711	5.70E-13	1	HS
360	GO:0051174	regulation of phosphorus metabolic proce...	301	79	34.54	2712	5.70E-13	1	HS
361	GO:0043902	positive regulation of multi-organism pr...	117	43	13.43	2713	7.90E-13	1	HS
362	GO:0006897	endocytosis	195	59	22.38	721	8.70E-13	0.07215	HS
363	GO:0060341	regulation of cellular localization	155	51	17.79	2714	8.90E-13	1	HS
232	GO:0007391	dorsal closure	105	49	12.05	3	1.50E-19	5.20E-13	HS
365	GO:0001934	positive regulation of protein phosphory...	118	43	13.54	2715	1.10E-12	1	HS
366	GO:2000243	positive regulation of reproductive proc...	60	29	6.88	2716	1.30E-12	1	HS
367	GO:0048511	rhythmic process	157	51	18.02	2717	1.60E-12	1	HS
368	GO:0048588	developmental cell growth	80	34	9.18	2718	1.60E-12	1	HS
369	GO:0001736	establishment of planar polarity	106	40	12.16	1579	1.90E-12	0.26858	HS
370	GO:0007164	establishment of tissue polarity	106	40	12.16	2719	1.90E-12	1	HS
371	GO:0009607	response to biotic stimulus	389	93	44.64	2720	1.90E-12	1	HS
372	GO:0007447	imaginal disc pattern formation	115	42	13.2	771	1.90E-12	0.10027	HS
373	GO:0040029	regulation of gene expression, epigeneti...	230	65	26.39	2721	1.90E-12	1	HS
374	GO:0009953	dorsal/ventral pattern formation	153	50	17.56	1236	2.00E-12	0.15662	HS
375	GO:0044093	positive regulation of molecular functio...	252	69	28.92	2722	2.10E-12	1	HS
376	GO:0043067	regulation of programmed cell death	225	64	25.82	1610	2.10E-12	0.2987	HS
364	GO:0007254	JNK cascade	71	32	8.15	121	1.00E-12	0.00029	HS
378	GO:0071695	anatomical structure maturation	65	30	7.46	2723	2.50E-12	1	HS
481	GO:0046328	regulation of JNK cascade	61	26	7	1528	6.30E-10	0.22702	HS
380	GO:0038127	ERBB signaling pathway	81	34	9.29	2724	2.50E-12	1	HS
381	GO:0014070	response to organic cyclic compound	98	38	11.25	2725	2.50E-12	1	HS
382	GO:0051403	stress-activated MAPK cascade	77	33	8.84	2726	2.60E-12	1	HS
383	GO:0009894	regulation of catabolic process	232	65	26.62	2727	3.00E-12	1	HS
384	GO:0042461	photoreceptor cell development	112	41	12.85	158	3.10E-12	0.00075	HS
385	GO:0042551	neuron maturation	58	28	6.66	2728	3.40E-12	1	HS
386	GO:0016569	covalent chromatin modification	206	60	23.64	2729	3.40E-12	1	HS
387	GO:0034248	regulation of cellular amide metabolic p...	201	59	23.06	2730	3.60E-12	1	HS
388	GO:0043207	response to external biotic stimulus	388	92	44.52	2731	4.10E-12	1	HS
389	GO:0051707	response to other organism	388	92	44.52	2732	4.10E-12	1	HS
390	GO:0032535	regulation of cellular component size	176	54	20.2	2733	4.40E-12	1	HS
391	GO:0007623	circadian rhythm	156	50	17.9	437	4.50E-12	0.0203	HS
392	GO:0016570	histone modification	202	59	23.18	2734	4.60E-12	1	HS
393	GO:0045664	regulation of neuron differentiation	192	57	22.03	2156	5.10E-12	0.56395	HS
394	GO:0098542	defense response to other organism	314	79	36.03	2735	6.10E-12	1	HS
395	GO:2000241	regulation of reproductive process	114	41	13.08	2736	6.10E-12	1	HS
396	GO:0010941	regulation of cell death	269	71	30.87	2737	6.60E-12	1	HS
397	GO:1901654	response to ketone	52	26	5.97	2738	7.20E-12	1	HS
398	GO:0016322	neuron remodeling	56	27	6.43	12	8.60E-12	1.40E-08	HS
399	GO:0034330	cell junction organization	84	34	9.64	2739	8.60E-12	1	HS
400	GO:0051962	positive regulation of nervous system de...	159	50	18.24	2740	1.00E-11	1	HS
570	GO:0007259	JAK-STAT cascade	38	18	4.36	1176	3.70E-08	0.14218	HS
402	GO:0031329	regulation of cellular catabolic process	211	60	24.21	2741	1.00E-11	1	HS
403	GO:0009880	embryonic pattern specification	206	59	23.64	169	1.10E-11	0.001	HS
404	GO:1902532	negative regulation of intracellular sig...	116	41	13.31	2742	1.20E-11	1	HS
405	GO:0010639	negative regulation of organelle organiz...	98	37	11.25	2743	1.20E-11	1	HS
406	GO:0051726	regulation of cell cycle	319	79	36.6	837	1.40E-11	0.11064	HS
407	GO:0008356	asymmetric cell division	103	38	11.82	172	1.50E-11	0.00105	HS
408	GO:1903047	mitotic cell cycle process	343	83	39.36	2744	1.60E-11	1	HS
409	GO:0042327	positive regulation of phosphorylation	141	46	16.18	2157	1.60E-11	0.56549	HS
410	GO:0060322	head development	141	46	16.18	1612	1.60E-11	0.30044	HS
411	GO:0009994	oocyte differentiation	161	50	18.47	1819	1.70E-11	0.37855	HS
412	GO:0022604	regulation of cell morphogenesis	151	48	17.33	1611	1.70E-11	0.30026	HS
413	GO:1902903	regulation of supramolecular fiber organ...	99	37	11.36	2745	1.80E-11	1	HS
414	GO:1901576	organic substance biosynthetic process	2903	435	333.11	2746	1.80E-11	1	HS
415	GO:0035075	response to ecdysone	50	25	5.74	94	1.80E-11	8.40E-05	HS
416	GO:0036314	response to sterol	50	25	5.74	2747	1.80E-11	1	HS
417	GO:0043933	protein-containing complex subunit organ...	735	144	84.34	2748	2.70E-11	1	HS
418	GO:0045596	negative regulation of cell differentiat...	105	38	12.05	1613	2.90E-11	0.30123	HS
419	GO:0051146	striated muscle cell differentiation	96	36	11.02	2749	3.00E-11	1	HS
420	GO:0046552	photoreceptor cell fate commitment	83	33	9.52	1320	3.10E-11	0.21293	HS
421	GO:0006810	transport	1787	290	205.05	2750	3.40E-11	1	HS
422	GO:0001709	cell fate determination	134	44	15.38	658	3.50E-11	0.06359	HS
423	GO:0010927	cellular component assembly involved in ...	154	48	17.67	2751	3.70E-11	1	HS
650	GO:0046425	regulation of JAK-STAT cascade	31	15	3.56	345	3.70E-07	0.01297	HS
425	GO:0009058	biosynthetic process	2925	436	335.63	2753	3.90E-11	1	HS
426	GO:0098657	import into cell	234	63	26.85	2754	4.20E-11	1	HS
427	GO:0051961	negative regulation of nervous system de...	102	37	11.7	2755	4.90E-11	1	HS
428	GO:0035282	segmentation	235	63	26.97	2303	5.10E-11	0.69407	HS
429	GO:0044249	cellular biosynthetic process	2859	427	328.06	2756	5.30E-11	1	HS
430	GO:0010608	posttranscriptional regulation of gene e...	252	66	28.92	2757	5.30E-11	1	HS
431	GO:0000226	microtubule cytoskeleton organization	357	84	40.96	2214	5.50E-11	0.60002	HS
432	GO:0032269	negative regulation of cellular protein ...	219	60	25.13	2758	5.60E-11	1	HS
433	GO:0008284	positive regulation of cell proliferatio...	89	34	10.21	43	5.80E-11	2.70E-06	HS
434	GO:0030534	adult behavior	156	48	17.9	2759	6.20E-11	1	HS
435	GO:0002252	immune effector process	151	47	17.33	2760	6.30E-11	1	HS
436	GO:0032870	cellular response to hormone stimulus	141	45	16.18	2218	6.30E-11	0.61455	HS
437	GO:0009798	axis specification	182	53	20.88	2761	6.40E-11	1	HS
651	GO:1904892	regulation of STAT cascade	31	15	3.56	2863	3.70E-07	1	HS
439	GO:0098727	maintenance of cell number	103	37	11.82	2762	6.80E-11	1	HS
440	GO:0051248	negative regulation of protein metabolic...	220	60	25.24	2763	6.90E-11	1	HS
441	GO:0016458	gene silencing	237	63	27.19	316	7.50E-11	0.0104	HS
442	GO:0009628	response to abiotic stimulus	433	96	49.68	2764	8.00E-11	1	HS
443	GO:0010562	positive regulation of phosphorus metabo...	152	47	17.44	2765	8.10E-11	1	HS
444	GO:0045937	positive regulation of phosphate metabol...	152	47	17.44	2766	8.10E-11	1	HS
445	GO:0042060	wound healing	99	36	11.36	67	8.30E-11	2.10E-05	HS
446	GO:0007420	brain development	118	40	13.54	166	9.20E-11	0.0009	HS
447	GO:0030100	regulation of endocytosis	69	29	7.92	89	9.90E-11	5.20E-05	HS
448	GO:0098609	cell-cell adhesion	128	42	14.69	45	1.00E-10	3.50E-06	HS
449	GO:0042254	ribosome biogenesis	222	60	25.47	593	1.00E-10	0.03713	HS
450	GO:0042067	establishment of ommatidial planar polar...	61	27	7	2388	1.00E-10	0.83467	HS
563	GO:0016055	Wnt signaling pathway	130	38	14.92	1798	2.90E-08	0.35728	HS
452	GO:0030718	germ-line stem cell population maintenan...	82	32	9.41	53	1.10E-10	5.20E-06	HS
453	GO:0032956	regulation of actin cytoskeleton organiz...	105	37	12.05	1143	1.30E-10	0.11858	HS
454	GO:0048599	oocyte development	139	44	15.95	2767	1.40E-10	1	HS
455	GO:0007293	germarium-derived egg chamber formation	96	35	11.02	1790	1.40E-10	0.33172	HS
456	GO:0035215	genital disc development	50	24	5.74	330	1.40E-10	0.0122	HS
457	GO:0044267	cellular protein metabolic process	2416	368	277.23	2768	1.90E-10	1	HS
458	GO:2000027	regulation of animal organ morphogenesis	97	35	11.13	2769	1.90E-10	1	HS
459	GO:0042692	muscle cell differentiation	111	38	12.74	2770	1.90E-10	1	HS
460	GO:0032970	regulation of actin filament-based proce...	107	37	12.28	2771	2.40E-10	1	HS
461	GO:0048190	wing disc dorsal/ventral pattern formati...	55	25	6.31	7	2.50E-10	2.50E-10	HS
462	GO:0033993	response to lipid	63	27	7.23	2772	2.60E-10	1	HS
463	GO:1901701	cellular response to oxygen-containing c...	189	53	21.69	2773	3.00E-10	1	HS
464	GO:0048863	stem cell differentiation	103	36	11.82	455	3.00E-10	0.02208	HS
465	GO:0042063	gliogenesis	94	34	10.79	2774	3.30E-10	1	HS
466	GO:0008285	negative regulation of cell proliferatio...	72	29	8.26	271	3.40E-10	0.00601	HS
467	GO:0046907	intracellular transport	713	137	81.81	2430	3.40E-10	0.93109	HS
468	GO:0006913	nucleocytoplasmic transport	118	39	13.54	1821	3.70E-10	0.38002	HS
469	GO:0051169	nuclear transport	118	39	13.54	2775	3.70E-10	1	HS
470	GO:0080135	regulation of cellular response to stres...	118	39	13.54	2776	3.70E-10	1	HS
471	GO:0043085	positive regulation of catalytic activit...	213	57	24.44	2777	4.60E-10	1	HS
472	GO:0070727	cellular macromolecule localization	662	129	75.96	2778	4.60E-10	1	HS
473	GO:0007626	locomotory behavior	186	52	21.34	2081	4.90E-10	0.5141	HS
474	GO:0043410	positive regulation of MAPK cascade	73	29	8.38	1581	5.00E-10	0.27074	HS
475	GO:0007308	oocyte construction	124	40	14.23	839	5.00E-10	0.11264	HS
476	GO:0045926	negative regulation of growth	100	35	11.47	749	5.10E-10	0.09406	HS
477	GO:0010623	programmed cell death involved in cell d...	105	36	12.05	2779	5.60E-10	1	HS
478	GO:0016192	vesicle-mediated transport	519	107	59.55	2446	6.00E-10	0.96607	HS
479	GO:0070302	regulation of stress-activated protein k...	65	27	7.46	2780	6.00E-10	1	HS
480	GO:0045087	innate immune response	187	52	21.46	2338	6.10E-10	0.74213	HS
587	GO:0030111	regulation of Wnt signaling pathway	103	32	11.82	2828	7.40E-08	1	HS
299	GO:0000165	MAPK cascade	137	51	15.72	660	3.20E-15	0.06434	HS
483	GO:1901184	regulation of ERBB signaling pathway	57	25	6.54	2781	6.50E-10	1	HS
484	GO:0006959	humoral immune response	120	39	13.77	2782	6.50E-10	1	HS
485	GO:0060627	regulation of vesicle-mediated transport	131	41	15.03	2783	8.60E-10	1	HS
486	GO:0008360	regulation of cell shape	66	27	7.57	38	9.10E-10	2.30E-06	HS
487	GO:0019730	antimicrobial humoral response	107	36	12.28	772	1.00E-09	0.10095	HS
488	GO:0016318	ommatidial rotation	32	18	3.67	8	1.00E-09	1.00E-09	HS
489	GO:0007616	long-term memory	75	29	8.61	9	1.10E-09	1.10E-09	HS
490	GO:0007350	blastoderm segmentation	190	52	21.8	619	1.10E-09	0.04952	HS
491	GO:0007268	chemical synaptic transmission	293	70	33.62	2148	1.10E-09	0.54701	HS
492	GO:0098916	anterograde trans-synaptic signaling	293	70	33.62	2784	1.10E-09	1	HS
493	GO:0031032	actomyosin structure organization	98	34	11.25	621	1.20E-09	0.05214	HS
494	GO:0010721	negative regulation of cell development	71	28	8.15	2785	1.20E-09	1	HS
495	GO:0007507	heart development	103	35	11.82	68	1.30E-09	2.20E-05	HS
496	GO:0006396	RNA processing	625	122	71.72	506	1.30E-09	0.03262	HS
497	GO:0050776	regulation of immune response	169	48	19.39	2786	1.30E-09	1	HS
498	GO:0099537	trans-synaptic signaling	294	70	33.74	2787	1.30E-09	1	HS
499	GO:0001752	compound eye photoreceptor fate commitme...	76	29	8.72	173	1.50E-09	0.00106	HS
500	GO:0042706	eye photoreceptor cell fate commitment	76	29	8.72	2788	1.50E-09	1	HS
501	GO:0099536	synaptic signaling	295	70	33.85	2789	1.60E-09	1	HS
502	GO:0007450	dorsal/ventral pattern formation, imagin...	59	25	6.77	2790	1.60E-09	1	HS
503	GO:0030097	hemopoiesis	86	31	9.87	1144	2.20E-09	0.11937	HS
504	GO:0032872	regulation of stress-activated MAPK casc...	64	26	7.34	2791	2.20E-09	1	HS
505	GO:0008586	imaginal disc-derived wing vein morphoge...	44	21	5.05	10	2.30E-09	2.30E-09	HS
506	GO:0035152	regulation of tube architecture, open tr...	91	32	10.44	1171	2.40E-09	0.14076	HS
507	GO:0006338	chromatin remodeling	125	39	14.34	288	2.50E-09	0.00806	HS
508	GO:0006403	RNA localization	183	50	21	2792	2.50E-09	1	HS
509	GO:0060249	anatomical structure homeostasis	183	50	21	2793	2.50E-09	1	HS
510	GO:0008587	imaginal disc-derived wing margin morpho...	56	24	6.43	99	2.50E-09	9.60E-05	HS
511	GO:0002520	immune system development	101	34	11.59	2794	2.90E-09	1	HS
512	GO:0048534	hematopoietic or lymphoid organ developm...	101	34	11.59	2795	2.90E-09	1	HS
513	GO:0035222	wing disc pattern formation	83	30	9.52	1142	3.60E-09	0.11761	HS
514	GO:0048640	negative regulation of developmental gro...	83	30	9.52	1824	3.60E-09	0.38121	HS
515	GO:0051050	positive regulation of transport	137	41	15.72	2796	3.80E-09	1	HS
516	GO:0072091	regulation of stem cell proliferation	57	24	6.54	840	3.90E-09	0.11335	HS
517	GO:0072359	circulatory system development	107	35	12.28	2797	4.00E-09	1	HS
518	GO:0048512	circadian behavior	112	36	12.85	1322	4.10E-09	0.21298	HS
519	GO:0008037	cell recognition	117	37	13.43	2798	4.20E-09	1	HS
920	GO:0070371	ERK1 and ERK2 cascade	42	15	4.82	2984	3.50E-05	1	HS
521	GO:0007517	muscle organ development	93	32	10.67	1940	4.50E-09	0.39738	HS
522	GO:0007265	Ras protein signal transduction	159	45	18.24	1963	4.80E-09	0.43899	HS
523	GO:0031347	regulation of defense response	159	45	18.24	2800	4.80E-09	1	HS
524	GO:0006796	phosphate-containing compound metabolic ...	1082	185	124.16	2801	5.00E-09	1	HS
525	GO:0006915	apoptotic process	267	64	30.64	1607	5.20E-09	0.27865	HS
526	GO:0007622	rhythmic behavior	113	36	12.97	2802	5.40E-09	1	HS
527	GO:0042981	regulation of apoptotic process	198	52	22.72	217	5.40E-09	0.00264	HS
528	GO:0055002	striated muscle cell development	62	25	7.11	2803	5.40E-09	1	HS
529	GO:0046777	protein autophosphorylation	42	20	4.82	57	5.80E-09	6.20E-06	HS
530	GO:0048056	R3/R4 cell differentiation	16	12	1.84	186	5.80E-09	0.00148	HS
531	GO:0007346	regulation of mitotic cell cycle	199	52	22.83	136	6.50E-09	0.00038	HS
532	GO:0035071	salivary gland cell autophagic cell deat...	28	16	3.21	138	6.60E-09	0.00041	HS
533	GO:0008038	neuron recognition	114	36	13.08	2804	7.00E-09	1	HS
534	GO:0035070	salivary gland histolysis	35	18	4.02	1260	7.10E-09	0.1845	HS
535	GO:0055001	muscle cell development	63	25	7.23	2805	8.00E-09	1	HS
536	GO:0018205	peptidyl-lysine modification	167	46	19.16	2806	8.20E-09	1	HS
537	GO:0007405	neuroblast proliferation	95	32	10.9	487	8.20E-09	0.02806	HS
538	GO:0007264	small GTPase mediated signal transductio...	178	48	20.42	1797	8.30E-09	0.35563	HS
539	GO:0007309	oocyte axis specification	120	37	13.77	1978	9.00E-09	0.45043	HS
540	GO:0043254	regulation of protein complex assembly	120	37	13.77	2807	9.00E-09	1	HS
541	GO:0007446	imaginal disc growth	55	23	6.31	751	9.60E-09	0.09522	HS
542	GO:0009952	anterior/posterior pattern specification	179	48	20.54	2808	1.00E-08	1	HS
253	GO:0016049	cell growth	156	59	17.9	2647	8.60E-18	1	HS
544	GO:0007548	sex differentiation	96	32	11.02	720	1.10E-08	0.07202	HS
379	GO:0007173	epidermal growth factor receptor signali...	81	34	9.29	163	2.50E-12	0.0008	HS
546	GO:0050804	modulation of chemical synaptic transmis...	126	38	14.46	1304	1.10E-08	0.20667	HS
547	GO:0099177	regulation of trans-synaptic signaling	126	38	14.46	2809	1.10E-08	1	HS
548	GO:0032101	regulation of response to external stimu...	169	46	19.39	2810	1.20E-08	1	HS
549	GO:0048102	autophagic cell death	29	16	3.33	2811	1.30E-08	1	HS
550	GO:0035218	leg disc development	102	33	11.7	774	1.50E-08	0.10127	HS
551	GO:0007017	microtubule-based process	463	94	53.13	1247	1.50E-08	0.1783	HS
552	GO:0045860	positive regulation of protein kinase ac...	52	22	5.97	238	1.60E-08	0.00438	HS
553	GO:0033674	positive regulation of kinase activity	74	27	8.49	754	1.70E-08	0.09551	HS
554	GO:0031532	actin cytoskeleton reorganization	33	17	3.79	21	1.80E-08	2.10E-07	HS
555	GO:0006793	phosphorus metabolic process	1101	185	126.34	2812	2.00E-08	1	HS
556	GO:0061351	neural precursor cell proliferation	103	33	11.82	2813	2.00E-08	1	HS
557	GO:0007442	hindgut morphogenesis	57	23	6.54	515	2.20E-08	0.03597	HS
558	GO:0061525	hindgut development	57	23	6.54	2814	2.20E-08	1	HS
559	GO:0046677	response to antibiotic	89	30	10.21	2815	2.40E-08	1	HS
560	GO:0042462	eye photoreceptor cell development	94	31	10.79	1825	2.50E-08	0.38127	HS
561	GO:0016333	morphogenesis of follicular epithelium	49	21	5.62	2816	2.50E-08	1	HS
562	GO:0045570	regulation of imaginal disc growth	45	20	5.16	352	2.50E-08	0.01311	HS
56	GO:0040007	growth	436	155	50.03	2508	< 1e-30	1	HS
564	GO:0045471	response to ethanol	71	26	8.15	2304	2.90E-08	0.69946	HS
565	GO:0050790	regulation of catalytic activity	385	81	44.18	2817	3.10E-08	1	HS
566	GO:1990138	neuron projection extension	58	23	6.66	2818	3.20E-08	1	HS
143	GO:0040008	regulation of growth	306	107	35.11	40	5.20E-28	2.60E-06	HS
568	GO:0048608	reproductive structure development	81	28	9.29	2819	3.70E-08	1	HS
569	GO:0061458	reproductive system development	81	28	9.29	2820	3.70E-08	1	HS
9	GO:0030154	cell differentiation	1677	451	192.43	1301	< 1e-30	0.20094	HS
571	GO:0034332	adherens junction organization	38	18	4.36	2082	3.70E-08	0.51512	HS
139	GO:0010605	negative regulation of macromolecule met...	835	206	95.81	2569	8.70E-29	1	HS
573	GO:0034613	cellular protein localization	599	113	68.73	2298	3.90E-08	0.66685	HS
574	GO:0051347	positive regulation of transferase activ...	86	29	9.87	2822	4.00E-08	1	HS
575	GO:0050769	positive regulation of neurogenesis	121	36	13.88	662	4.00E-08	0.06553	HS
576	GO:0045216	cell-cell junction organization	63	24	7.23	66	4.10E-08	1.90E-05	HS
577	GO:0051235	maintenance of location	116	35	13.31	2823	4.20E-08	1	HS
578	GO:0016071	mRNA metabolic process	427	87	49	2824	4.50E-08	1	HS
579	GO:0007349	cellularization	107	33	12.28	60	5.60E-08	8.80E-06	HS
580	GO:0198738	cell-cell signaling by wnt	144	40	16.52	1319	6.00E-08	0.21292	HS
581	GO:0120035	regulation of plasma membrane bounded ce...	155	42	17.79	2825	6.10E-08	1	HS
582	GO:0031056	regulation of histone modification	47	20	5.39	2826	6.30E-08	1	HS
583	GO:1902904	negative regulation of supramolecular fi...	28	15	3.21	2827	6.40E-08	1	HS
584	GO:0046847	filopodium assembly	43	19	4.93	519	6.40E-08	0.03614	HS
401	GO:0046620	regulation of organ growth	64	29	7.34	1256	1.00E-11	0.18281	HS
586	GO:0006364	rRNA processing	145	40	16.64	98	7.30E-08	9.20E-05	HS
424	GO:0035265	organ growth	75	31	8.61	2752	3.70E-11	1	HS
588	GO:0010564	regulation of cell cycle process	184	47	21.11	2829	7.40E-08	1	HS
589	GO:0031344	regulation of cell projection organizati...	156	42	17.9	2830	7.40E-08	1	HS
590	GO:2000647	negative regulation of stem cell prolife...	25	14	2.87	102	8.40E-08	0.0001	HS
591	GO:1905114	cell surface receptor signaling pathway ...	135	38	15.49	2831	8.70E-08	1	HS
592	GO:0008340	determination of adult lifespan	168	44	19.28	16	8.80E-08	8.80E-08	HS
593	GO:0032880	regulation of protein localization	114	34	13.08	735	8.90E-08	0.08063	HS
594	GO:0010638	positive regulation of organelle organiz...	157	42	18.02	2832	9.00E-08	1	HS
595	GO:0042051	compound eye photoreceptor development	89	29	10.21	418	9.40E-08	0.01556	HS
596	GO:0031400	negative regulation of protein modificat...	99	31	11.36	2833	9.60E-08	1	HS
597	GO:1903311	regulation of mRNA metabolic process	141	39	16.18	2834	9.90E-08	1	HS
598	GO:0009617	response to bacterium	275	62	31.56	2147	1.00E-07	0.54304	HS
599	GO:0016319	mushroom body development	75	26	8.61	20	1.10E-07	1.10E-07	HS
600	GO:0016072	rRNA metabolic process	164	43	18.82	2835	1.20E-07	1	HS
601	GO:0071375	cellular response to peptide hormone sti...	90	29	10.33	2836	1.20E-07	1	HS
602	GO:1901653	cellular response to peptide	90	29	10.33	2837	1.20E-07	1	HS
603	GO:0007266	Rho protein signal transduction	53	21	6.08	101	1.30E-07	0.0001	HS
604	GO:0051168	nuclear export	71	25	8.15	841	1.30E-07	0.1134	HS
605	GO:0070925	organelle assembly	398	81	45.67	2838	1.40E-07	1	HS
606	GO:0043549	regulation of kinase activity	116	34	13.31	2839	1.40E-07	1	HS
482	GO:0042058	regulation of epidermal growth factor re...	57	25	6.54	255	6.50E-10	0.00533	HS
608	GO:0030952	establishment or maintenance of cytoskel...	49	20	5.62	2840	1.40E-07	1	HS
609	GO:2001251	negative regulation of chromosome organi...	49	20	5.62	2841	1.40E-07	1	HS
610	GO:0042742	defense response to bacterium	241	56	27.65	1795	1.50E-07	0.34808	HS
611	GO:0010259	multicellular organism aging	171	44	19.62	2842	1.50E-07	1	HS
612	GO:0009896	positive regulation of catabolic process	127	36	14.57	2843	1.60E-07	1	HS
613	GO:0043901	negative regulation of multi-organism pr...	37	17	4.25	2844	1.60E-07	1	HS
614	GO:0046578	regulation of Ras protein signal transdu...	86	28	9.87	2080	1.60E-07	0.51386	HS
615	GO:0016203	muscle attachment	41	18	4.7	15	1.60E-07	8.20E-08	HS
616	GO:0060538	skeletal muscle organ development	41	18	4.7	2845	1.60E-07	1	HS
617	GO:0007568	aging	177	45	20.31	2846	1.60E-07	1	HS
618	GO:0045859	regulation of protein kinase activity	91	29	10.44	2847	1.60E-07	1	HS
619	GO:0007498	mesoderm development	96	30	11.02	65	1.60E-07	1.70E-05	HS
620	GO:0000122	negative regulation of transcription by ...	224	53	25.7	30	1.70E-07	8.40E-07	HS
621	GO:0006342	chromatin silencing	117	34	13.43	239	1.80E-07	0.00439	HS
622	GO:0045814	negative regulation of gene expression, ...	117	34	13.43	2848	1.80E-07	1	HS
623	GO:0034249	negative regulation of cellular amide me...	77	26	8.84	2849	1.90E-07	1	HS
624	GO:0042273	ribosomal large subunit biogenesis	63	23	7.23	737	2.00E-07	0.08156	HS
625	GO:1903827	regulation of cellular protein localizat...	63	23	7.23	2850	2.00E-07	1	HS
626	GO:0048639	positive regulation of developmental gro...	102	31	11.7	2851	2.00E-07	1	HS
627	GO:0016573	histone acetylation	87	28	9.98	480	2.10E-07	0.02365	HS
628	GO:0035011	melanotic encapsulation of foreign targe...	30	15	3.44	22	2.10E-07	2.10E-07	HS
629	GO:0048619	embryonic hindgut morphogenesis	50	20	5.74	1175	2.10E-07	0.14206	HS
630	GO:0010243	response to organonitrogen compound	185	46	21.23	2852	2.40E-07	1	HS
631	GO:0035216	haltere disc development	14	10	1.61	2853	2.50E-07	1	HS
632	GO:0007274	neuromuscular synaptic transmission	78	26	8.95	85	2.60E-07	5.00E-05	HS
633	GO:0034329	cell junction assembly	64	23	7.34	2854	2.70E-07	1	HS
634	GO:0098722	asymmetric stem cell division	64	23	7.34	843	2.70E-07	0.1135	HS
635	GO:0032868	response to insulin	93	29	10.67	2855	2.70E-07	1	HS
636	GO:0046843	dorsal appendage formation	55	21	6.31	24	2.70E-07	2.70E-07	HS
637	GO:0048149	behavioral response to ethanol	55	21	6.31	25	2.70E-07	2.70E-07	HS
638	GO:0048675	axon extension	55	21	6.31	18	2.70E-07	1.00E-07	HS
639	GO:0065003	protein-containing complex assembly	607	111	69.65	2076	2.70E-07	0.50684	HS
640	GO:0007612	learning	69	24	7.92	516	3.00E-07	0.03599	HS
641	GO:0001655	urogenital system development	74	25	8.49	2856	3.30E-07	1	HS
642	GO:0072001	renal system development	74	25	8.49	2857	3.30E-07	1	HS
643	GO:0008361	regulation of cell size	104	31	11.93	2858	3.30E-07	1	HS
644	GO:0051056	regulation of small GTPase mediated sign...	94	29	10.79	2859	3.50E-07	1	HS
645	GO:0006475	internal protein amino acid acetylation	89	28	10.21	2860	3.60E-07	1	HS
646	GO:0007306	eggshell chorion assembly	89	28	10.21	2341	3.60E-07	0.76367	HS
647	GO:0018393	internal peptidyl-lysine acetylation	89	28	10.21	2861	3.60E-07	1	HS
648	GO:0018394	peptidyl-lysine acetylation	89	28	10.21	2862	3.60E-07	1	HS
649	GO:0043068	positive regulation of programmed cell d...	89	28	10.21	1828	3.60E-07	0.38184	HS
520	GO:0048546	digestive tract morphogenesis	70	27	8.03	2799	4.30E-09	1	HS
545	GO:0045927	positive regulation of growth	126	38	14.46	100	1.10E-08	0.0001	HS
652	GO:0002684	positive regulation of immune system pro...	115	33	13.2	2864	3.70E-07	1	HS
653	GO:0050684	regulation of mRNA processing	115	33	13.2	1257	3.70E-07	0.1832	HS
654	GO:0061326	renal tubule development	65	23	7.46	2865	3.80E-07	1	HS
655	GO:0072002	Malpighian tubule development	65	23	7.46	1529	3.80E-07	0.22792	HS
656	GO:0007422	peripheral nervous system development	56	21	6.43	56	3.90E-07	6.10E-06	HS
657	GO:0045475	locomotor rhythm	70	24	8.03	32	4.10E-07	1.40E-06	HS
658	GO:0060070	canonical Wnt signaling pathway	105	31	12.05	1244	4.20E-07	0.17568	HS
659	GO:0010942	positive regulation of cell death	100	30	11.47	1826	4.40E-07	0.38166	HS
660	GO:0110053	regulation of actin filament organizatio...	75	25	8.61	2866	4.40E-07	1	HS
661	GO:0018193	peptidyl-amino acid modification	389	78	44.64	2867	4.50E-07	1	HS
662	GO:0043434	response to peptide hormone	95	29	10.9	2868	4.50E-07	1	HS
663	GO:1901652	response to peptide	95	29	10.9	2869	4.50E-07	1	HS
664	GO:0035166	post-embryonic hemopoiesis	52	20	5.97	2870	4.60E-07	1	HS
665	GO:0035167	larval lymph gland hemopoiesis	52	20	5.97	156	4.60E-07	0.00069	HS
666	GO:0050768	negative regulation of neurogenesis	61	22	7	1174	4.60E-07	0.14193	HS
667	GO:0042592	homeostatic process	517	97	59.32	2871	4.80E-07	1	HS
668	GO:0032271	regulation of protein polymerization	66	23	7.57	2872	5.10E-07	1	HS
669	GO:0035006	melanization defense response	48	19	5.51	1170	5.20E-07	0.1403	HS
670	GO:0045807	positive regulation of endocytosis	48	19	5.51	279	5.20E-07	0.00758	HS
671	GO:0035160	maintenance of epithelial integrity, ope...	12	9	1.38	28	5.40E-07	5.40E-07	HS
672	GO:0007443	Malpighian tubule morphogenesis	44	18	5.05	488	5.80E-07	0.02814	HS
673	GO:0008355	olfactory learning	44	18	5.05	35	5.80E-07	1.60E-06	HS
674	GO:0061333	renal tubule morphogenesis	44	18	5.05	2873	5.80E-07	1	HS
675	GO:0007478	leg disc morphogenesis	81	26	9.29	663	6.00E-07	0.06603	HS
676	GO:0097306	cellular response to alcohol	32	15	3.67	2874	6.20E-07	1	HS
677	GO:0071417	cellular response to organonitrogen comp...	112	32	12.85	2875	6.20E-07	1	HS
678	GO:0030010	establishment of cell polarity	62	22	7.11	1799	6.30E-07	0.36024	HS
679	GO:0060033	anatomical structure regression	62	22	7.11	2876	6.30E-07	1	HS
680	GO:0048865	stem cell fate commitment	36	16	4.13	159	6.40E-07	0.00077	HS
681	GO:0051489	regulation of filopodium assembly	36	16	4.13	289	6.40E-07	0.00806	HS
682	GO:0048803	imaginal disc-derived male genitalia mor...	18	11	2.07	29	6.50E-07	6.50E-07	HS
683	GO:0051338	regulation of transferase activity	134	36	15.38	2877	6.60E-07	1	HS
684	GO:0045786	negative regulation of cell cycle	107	31	12.28	328	6.60E-07	0.01218	HS
685	GO:0043242	negative regulation of protein complex d...	15	10	1.72	2878	6.70E-07	1	HS
686	GO:1901880	negative regulation of protein depolymer...	15	10	1.72	2879	6.70E-07	1	HS
687	GO:0030865	cortical cytoskeleton organization	67	23	7.69	1326	7.00E-07	0.21416	HS
688	GO:0001708	cell fate specification	102	30	11.7	435	7.00E-07	0.01826	HS
689	GO:0001933	negative regulation of protein phosphory...	72	24	8.26	490	7.40E-07	0.02844	HS
690	GO:0060828	regulation of canonical Wnt signaling pa...	92	28	10.56	1829	7.60E-07	0.38192	HS
691	GO:0051051	negative regulation of transport	49	19	5.62	2880	7.70E-07	1	HS
692	GO:0070507	regulation of microtubule cytoskeleton o...	58	21	6.66	2159	7.70E-07	0.57	HS
693	GO:0046532	regulation of photoreceptor cell differe...	45	18	5.16	844	8.70E-07	0.11374	HS
694	GO:1901698	response to nitrogen compound	193	46	22.15	2881	8.80E-07	1	HS
695	GO:0050657	nucleic acid transport	103	30	11.82	2882	8.80E-07	1	HS
696	GO:0050658	RNA transport	103	30	11.82	1827	8.80E-07	0.38174	HS
697	GO:0050795	regulation of behavior	98	29	11.25	2883	9.30E-07	1	HS
698	GO:0016334	establishment or maintenance of polarity...	29	14	3.33	290	9.40E-07	0.00809	HS
699	GO:0048542	lymph gland development	68	23	7.8	1580	9.40E-07	0.27047	HS
572	GO:0097696	STAT cascade	38	18	4.36	2821	3.70E-08	1	HS
701	GO:0051494	negative regulation of cytoskeleton orga...	33	15	3.79	2884	1.00E-06	1	HS
702	GO:0043062	extracellular structure organization	78	25	8.95	2885	1.00E-06	1	HS
703	GO:0042493	response to drug	200	47	22.95	2379	1.00E-06	0.81253	HS
704	GO:0030239	myofibril assembly	50	19	5.74	755	1.10E-06	0.0958	HS
705	GO:0002831	regulation of response to biotic stimulu...	104	30	11.93	2886	1.10E-06	1	HS
706	GO:0050778	positive regulation of immune response	104	30	11.93	344	1.10E-06	0.01284	HS
707	GO:0032886	regulation of microtubule-based process	69	23	7.92	2887	1.30E-06	1	HS
708	GO:0032386	regulation of intracellular transport	74	24	8.49	2221	1.30E-06	0.61848	HS
709	GO:0042326	negative regulation of phosphorylation	74	24	8.49	2888	1.30E-06	1	HS
710	GO:0035126	post-embryonic genitalia morphogenesis	19	11	2.18	2889	1.40E-06	1	HS
711	GO:0035212	cell competition in a multicellular orga...	19	11	2.18	31	1.40E-06	1.40E-06	HS
712	GO:0048805	imaginal disc-derived genitalia morphoge...	19	11	2.18	2890	1.40E-06	1	HS
713	GO:0048808	male genitalia morphogenesis	19	11	2.18	2891	1.40E-06	1	HS
714	GO:0090598	male anatomical structure morphogenesis	19	11	2.18	2892	1.40E-06	1	HS
715	GO:0051236	establishment of RNA localization	105	30	12.05	2893	1.40E-06	1	HS
716	GO:0000910	cytokinesis	116	32	13.31	2894	1.50E-06	1	HS
717	GO:0051648	vesicle localization	116	32	13.31	2895	1.50E-06	1	HS
718	GO:0001894	tissue homeostasis	60	21	6.88	1259	1.50E-06	0.18447	HS
719	GO:0051170	import into nucleus	60	21	6.88	1328	1.50E-06	0.21434	HS
720	GO:0051258	protein polymerization	95	28	10.9	2896	1.60E-06	1	HS
721	GO:0007464	R3/R4 cell fate commitment	13	9	1.49	33	1.60E-06	1.60E-06	HS
722	GO:0007482	haltere development	13	9	1.49	47	1.60E-06	3.50E-06	HS
723	GO:0030155	regulation of cell adhesion	51	19	5.85	514	1.60E-06	0.03587	HS
585	GO:0032869	cellular response to insulin stimulus	88	29	10.1	1222	7.10E-08	0.1469	HS
725	GO:0061919	process utilizing autophagic mechanism	185	44	21.23	2897	1.60E-06	1	HS
726	GO:0007526	larval somatic muscle development	34	15	3.9	36	1.60E-06	1.60E-06	HS
727	GO:0032147	activation of protein kinase activity	34	15	3.9	95	1.60E-06	8.80E-05	HS
728	GO:0000380	alternative mRNA splicing, via spliceoso...	90	27	10.33	842	1.60E-06	0.11341	HS
729	GO:0007314	oocyte anterior/posterior axis specifica...	80	25	9.18	198	1.70E-06	0.00161	HS
730	GO:0035172	hemocyte proliferation	47	18	5.39	1177	1.80E-06	0.14236	HS
731	GO:1902692	regulation of neuroblast proliferation	47	18	5.39	1981	1.80E-06	0.45323	HS
732	GO:0031331	positive regulation of cellular cataboli...	112	31	12.85	2898	2.00E-06	1	HS
733	GO:0030539	male genitalia development	23	12	2.64	1836	2.00E-06	0.38383	HS
734	GO:0007427	epithelial cell migration, open tracheal...	43	17	4.93	77	2.10E-06	3.50E-05	HS
735	GO:0006582	melanin metabolic process	52	19	5.97	2899	2.20E-06	1	HS
736	GO:0046622	positive regulation of organ growth	27	13	3.1	86	2.40E-06	5.00E-05	HS
737	GO:0051650	establishment of vesicle localization	113	31	12.97	2900	2.40E-06	1	HS
738	GO:0006473	protein acetylation	97	28	11.13	2901	2.50E-06	1	HS
739	GO:0051293	establishment of spindle localization	35	15	4.02	2902	2.50E-06	1	HS
740	GO:0051653	spindle localization	35	15	4.02	2903	2.50E-06	1	HS
741	GO:0046330	positive regulation of JNK cascade	31	14	3.56	62	2.60E-06	1.00E-05	HS
742	GO:1901699	cellular response to nitrogen compound	119	32	13.65	2904	2.70E-06	1	HS
743	GO:0031334	positive regulation of protein complex a...	62	21	7.11	513	2.70E-06	0.03583	HS
744	GO:0007475	apposition of dorsal and ventral imagina...	20	11	2.29	42	2.70E-06	2.70E-06	HS
745	GO:0034333	adherens junction assembly	20	11	2.29	332	2.70E-06	0.01244	HS
746	GO:0007480	imaginal disc-derived leg morphogenesis	77	24	8.84	44	2.90E-06	3.00E-06	HS
747	GO:0000578	embryonic axis specification	114	31	13.08	2905	2.90E-06	1	HS
748	GO:0030177	positive regulation of Wnt signaling pat...	53	19	6.08	665	3.10E-06	0.06637	HS
749	GO:0045185	maintenance of protein location	44	17	5.05	1832	3.10E-06	0.38322	HS
607	GO:0008286	insulin receptor signaling pathway	76	26	8.72	64	1.40E-07	1.50E-05	HS
751	GO:0034622	cellular protein-containing complex asse...	567	101	65.06	2906	3.30E-06	1	HS
752	GO:0045088	regulation of innate immune response	93	27	10.67	752	3.30E-06	0.09527	HS
753	GO:0006606	protein import into nucleus	58	20	6.66	114	3.40E-06	0.00023	HS
754	GO:0031109	microtubule polymerization or depolymeri...	58	20	6.66	2907	3.40E-06	1	HS
755	GO:0051495	positive regulation of cytoskeleton orga...	58	20	6.66	1616	3.40E-06	0.30375	HS
756	GO:2000177	regulation of neural precursor cell prol...	58	20	6.66	1776	3.40E-06	0.31719	HS
757	GO:0061041	regulation of wound healing	17	10	1.95	851	3.50E-06	0.11414	HS
758	GO:0030951	establishment or maintenance of microtub...	40	16	4.59	630	3.50E-06	0.05328	HS
759	GO:0032102	negative regulation of response to exter...	40	16	4.59	2908	3.50E-06	1	HS
760	GO:0007485	imaginal disc-derived male genitalia dev...	24	12	2.75	2085	3.60E-06	0.51633	HS
761	GO:0033627	cell adhesion mediated by integrin	24	12	2.75	41	3.60E-06	2.70E-06	HS
762	GO:0008358	maternal determination of anterior/poste...	83	25	9.52	2909	3.60E-06	1	HS
763	GO:0045995	regulation of embryonic development	83	25	9.52	1224	3.60E-06	0.14773	HS
700	GO:0007219	Notch signaling pathway	88	27	10.1	625	1.00E-06	0.05272	HS
765	GO:0070828	heterochromatin organization	49	18	5.62	1982	3.70E-06	0.45329	HS
766	GO:0034504	protein localization to nucleus	68	22	7.8	1979	3.80E-06	0.45281	HS
767	GO:0044265	cellular macromolecule catabolic process	492	90	56.45	2910	3.80E-06	1	HS
768	GO:0110116	regulation of compound eye photoreceptor...	36	15	4.13	2911	3.90E-06	1	HS
769	GO:0012502	induction of programmed cell death	14	9	1.61	2912	3.90E-06	1	HS
770	GO:0032387	negative regulation of intracellular tra...	14	9	1.61	2913	3.90E-06	1	HS
771	GO:0035072	ecdysone-mediated induction of salivary ...	14	9	1.61	48	3.90E-06	3.90E-06	HS
772	GO:0035078	induction of programmed cell death by ec...	14	9	1.61	2914	3.90E-06	1	HS
773	GO:0035081	induction of programmed cell death by ho...	14	9	1.61	2915	3.90E-06	1	HS
774	GO:0046664	dorsal closure, amnioserosa morphology c...	14	9	1.61	49	3.90E-06	3.90E-06	HS
775	GO:0009948	anterior/posterior axis specification	121	32	13.88	2219	3.90E-06	0.6177	HS
776	GO:1905268	negative regulation of chromatin organiz...	28	13	3.21	2916	4.00E-06	1	HS
777	GO:0051261	protein depolymerization	32	14	3.67	2917	4.10E-06	1	HS
778	GO:0043484	regulation of RNA splicing	116	31	13.31	722	4.40E-06	0.07245	HS
779	GO:0000381	regulation of alternative mRNA splicing,...	89	26	10.21	50	4.40E-06	4.40E-06	HS
780	GO:0007351	tripartite regional subdivision	111	30	12.74	2918	4.90E-06	1	HS
781	GO:0008595	anterior/posterior axis specification, e...	111	30	12.74	1258	4.90E-06	0.18376	HS
782	GO:0007419	ventral cord development	74	23	8.49	51	4.90E-06	4.90E-06	HS
783	GO:0006402	mRNA catabolic process	95	27	10.9	753	5.10E-06	0.09531	HS
784	GO:0035112	genitalia morphogenesis	21	11	2.41	2919	5.10E-06	1	HS
785	GO:1901879	regulation of protein depolymerization	21	11	2.41	2920	5.10E-06	1	HS
786	GO:0035206	regulation of hemocyte proliferation	41	16	4.7	39	5.20E-06	2.40E-06	HS
764	GO:0035329	hippo signaling	49	18	5.62	461	3.70E-06	0.02261	HS
788	GO:0008306	associative learning	55	19	6.31	2323	5.80E-06	0.73492	HS
787	GO:0045793	positive regulation of cell size	41	16	4.7	52	5.20E-06	5.20E-06	HS
790	GO:0042059	negative regulation of epidermal growth ...	37	15	4.25	54	5.80E-06	5.80E-06	HS
791	GO:0045214	sarcomere organization	37	15	4.25	55	5.80E-06	5.80E-06	HS
792	GO:0048010	vascular endothelial growth factor recep...	37	15	4.25	34	5.80E-06	1.60E-06	HS
793	GO:1901185	negative regulation of ERBB signaling pa...	37	15	4.25	2922	5.80E-06	1	HS
794	GO:0044770	cell cycle phase transition	129	33	14.8	2923	6.10E-06	1	HS
795	GO:0007448	anterior/posterior pattern specification...	25	12	2.87	256	6.20E-06	0.00544	HS
796	GO:0002683	negative regulation of immune system pro...	75	23	8.61	2924	6.30E-06	1	HS
797	GO:0032874	positive regulation of stress-activated ...	33	14	3.79	2925	6.30E-06	1	HS
798	GO:0048806	genitalia development	33	14	3.79	1333	6.30E-06	0.21493	HS
799	GO:0070304	positive regulation of stress-activated ...	33	14	3.79	2926	6.30E-06	1	HS
800	GO:0071407	cellular response to organic cyclic comp...	33	14	3.79	2927	6.30E-06	1	HS
801	GO:0045466	R7 cell differentiation	65	21	7.46	199	6.40E-06	0.00162	HS
802	GO:0007028	cytoplasm organization	70	22	8.03	2928	6.40E-06	1	HS
803	GO:0009266	response to temperature stimulus	135	34	15.49	1775	6.40E-06	0.31546	HS
804	GO:0040001	establishment of mitotic spindle localiz...	29	13	3.33	537	6.50E-06	0.03645	HS
805	GO:0048015	phosphatidylinositol-mediated signaling	29	13	3.33	462	6.50E-06	0.02274	HS
806	GO:0046426	negative regulation of JAK-STAT cascade	18	10	2.07	59	7.00E-06	7.00E-06	HS
807	GO:1904893	negative regulation of STAT cascade	18	10	2.07	2929	7.00E-06	1	HS
808	GO:0140014	mitotic nuclear division	159	38	18.24	2930	7.20E-06	1	HS
809	GO:0000070	mitotic sister chromatid segregation	113	30	12.97	1261	7.20E-06	0.18481	HS
810	GO:0016197	endosomal transport	102	28	11.7	1237	7.20E-06	0.1617	HS
811	GO:0007369	gastrulation	86	25	9.87	2158	7.30E-06	0.56977	HS
812	GO:0030048	actin filament-based movement	42	16	4.82	782	7.50E-06	0.10263	HS
813	GO:0031023	microtubule organizing center organizati...	81	24	9.29	2931	7.80E-06	1	HS
814	GO:0048568	embryonic organ development	56	19	6.43	1617	7.80E-06	0.30391	HS
815	GO:0007525	somatic muscle development	76	23	8.72	1223	8.10E-06	0.14731	HS
816	GO:0006405	RNA export from nucleus	61	20	7	149	8.20E-06	0.0006	HS
817	GO:0019731	antibacterial humoral response	61	20	7	46	8.20E-06	3.50E-06	HS
818	GO:0042752	regulation of circadian rhythm	92	26	10.56	738	8.60E-06	0.08167	HS
819	GO:0045880	positive regulation of smoothened signal...	47	17	5.39	61	8.80E-06	8.80E-06	HS
820	GO:0060491	regulation of cell projection assembly	47	17	5.39	2932	8.80E-06	1	HS
821	GO:0120032	regulation of plasma membrane bounded ce...	47	17	5.39	2933	8.80E-06	1	HS
822	GO:0048024	regulation of mRNA splicing, via spliceo...	103	28	11.82	1966	8.80E-06	0.44325	HS
823	GO:0007483	genital disc morphogenesis	22	11	2.52	2934	9.20E-06	1	HS
824	GO:0031111	negative regulation of microtubule polym...	12	8	1.38	2935	9.50E-06	1	HS
825	GO:0007549	dosage compensation	26	12	2.98	494	1.00E-05	0.02892	HS
826	GO:0046667	compound eye retinal cell programmed cel...	26	12	2.98	88	1.00E-05	5.10E-05	HS
827	GO:0031110	regulation of microtubule polymerization...	30	13	3.44	2222	1.00E-05	0.62022	HS
828	GO:0048017	inositol lipid-mediated signaling	30	13	3.44	2936	1.00E-05	1	HS
829	GO:1903034	regulation of response to wounding	30	13	3.44	2937	1.00E-05	1	HS
830	GO:0008593	regulation of Notch signaling pathway	77	23	8.84	777	1.00E-05	0.10223	HS
831	GO:0007043	cell-cell junction assembly	57	19	6.54	2938	1.00E-05	1	HS
832	GO:0030866	cortical actin cytoskeleton organization	57	19	6.54	115	1.00E-05	0.00024	HS
833	GO:0051964	negative regulation of synapse assembly	43	16	4.93	2939	1.10E-05	1	HS
834	GO:0051965	positive regulation of synapse assembly	43	16	4.93	668	1.10E-05	0.06654	HS
835	GO:1905809	negative regulation of synapse organizat...	43	16	4.93	2940	1.10E-05	1	HS
836	GO:0008154	actin polymerization or depolymerization	72	22	8.26	2941	1.10E-05	1	HS
837	GO:0008064	regulation of actin polymerization or de...	62	20	7.11	666	1.10E-05	0.06637	HS
838	GO:0030832	regulation of actin filament length	62	20	7.11	2942	1.10E-05	1	HS
839	GO:0015931	nucleobase-containing compound transport	121	31	13.88	2943	1.10E-05	1	HS
840	GO:0000819	sister chromatid segregation	127	32	14.57	2944	1.20E-05	1	HS
841	GO:0030703	eggshell formation	127	32	14.57	1324	1.20E-05	0.21383	HS
842	GO:0090263	positive regulation of canonical Wnt sig...	48	17	5.51	63	1.20E-05	1.20E-05	HS
843	GO:0000768	syncytium formation by plasma membrane f...	39	15	4.48	2945	1.30E-05	1	HS
844	GO:0003007	heart morphogenesis	39	15	4.48	1172	1.30E-05	0.14113	HS
845	GO:0006949	syncytium formation	39	15	4.48	2946	1.30E-05	1	HS
846	GO:0007520	myoblast fusion	39	15	4.48	58	1.30E-05	6.50E-06	HS
847	GO:0014902	myotube differentiation	39	15	4.48	2947	1.30E-05	1	HS
848	GO:0035010	encapsulation of foreign target	39	15	4.48	2948	1.30E-05	1	HS
849	GO:0035088	establishment or maintenance of apical/b...	39	15	4.48	1834	1.30E-05	0.38356	HS
850	GO:0051647	nucleus localization	39	15	4.48	517	1.30E-05	0.03601	HS
851	GO:0061245	establishment or maintenance of bipolar ...	39	15	4.48	2949	1.30E-05	1	HS
852	GO:0140253	cell-cell fusion	39	15	4.48	2950	1.30E-05	1	HS
853	GO:0009057	macromolecule catabolic process	563	98	64.6	2951	1.30E-05	1	HS
854	GO:0010769	regulation of cell morphogenesis involve...	94	26	10.79	2952	1.30E-05	1	HS
855	GO:0006909	phagocytosis	53	18	6.08	739	1.30E-05	0.08225	HS
856	GO:0031333	negative regulation of protein complex a...	19	10	2.18	2953	1.30E-05	1	HS
857	GO:0010563	negative regulation of phosphorus metabo...	89	25	10.21	2954	1.40E-05	1	HS
858	GO:0045936	negative regulation of phosphate metabol...	89	25	10.21	2955	1.40E-05	1	HS
859	GO:0008347	glial cell migration	35	14	4.02	78	1.40E-05	3.50E-05	HS
860	GO:0060581	cell fate commitment involved in pattern...	35	14	4.02	518	1.40E-05	0.03603	HS
861	GO:0046621	negative regulation of organ growth	23	11	2.64	1182	1.60E-05	0.14311	HS
862	GO:0031589	cell-substrate adhesion	31	13	3.56	2956	1.60E-05	1	HS
863	GO:0045197	establishment or maintenance of epitheli...	31	13	3.56	419	1.60E-05	0.01596	HS
864	GO:0043543	protein acylation	123	31	14.11	2957	1.60E-05	1	HS
865	GO:0044772	mitotic cell cycle phase transition	123	31	14.11	2958	1.60E-05	1	HS
866	GO:0007484	imaginal disc-derived genitalia developm...	27	12	3.1	2959	1.70E-05	1	HS
867	GO:0007269	neurotransmitter secretion	101	27	11.59	1559	1.80E-05	0.23502	HS
868	GO:0071363	cellular response to growth factor stimu...	101	27	11.59	2960	1.80E-05	1	HS
869	GO:0099643	signal release from synapse	101	27	11.59	2961	1.80E-05	1	HS
870	GO:0070372	regulation of ERK1 and ERK2 cascade	40	15	4.59	2962	1.80E-05	1	HS
871	GO:1903429	regulation of cell maturation	40	15	4.59	2963	1.80E-05	1	HS
872	GO:0016571	histone methylation	69	21	7.92	2964	1.80E-05	1	HS
873	GO:0048871	multicellular organismal homeostasis	69	21	7.92	2965	1.80E-05	1	HS
874	GO:0006974	cellular response to DNA damage stimulus	240	50	27.54	1141	1.80E-05	0.11706	HS
875	GO:0043063	intercellular bridge organization	16	9	1.84	852	1.80E-05	0.11422	HS
876	GO:0010975	regulation of neuron projection developm...	118	30	13.54	2966	1.80E-05	1	HS
877	GO:0099003	vesicle-mediated transport in synapse	118	30	13.54	2967	1.80E-05	1	HS
878	GO:0001763	morphogenesis of a branching structure	59	19	6.77	2968	1.80E-05	1	HS
879	GO:0034968	histone lysine methylation	59	19	6.77	2969	1.80E-05	1	HS
880	GO:0048754	branching morphogenesis of an epithelial...	59	19	6.77	2970	1.80E-05	1	HS
881	GO:0060446	branching involved in open tracheal syst...	59	19	6.77	1263	1.80E-05	0.18489	HS
882	GO:0061138	morphogenesis of a branching epithelium	59	19	6.77	2971	1.80E-05	1	HS
883	GO:0002697	regulation of immune effector process	85	24	9.75	2972	1.90E-05	1	HS
884	GO:0007635	chemosensory behavior	85	24	9.75	2973	1.90E-05	1	HS
885	GO:0002920	regulation of humoral immune response	80	23	9.18	2974	2.10E-05	1	HS
886	GO:0022416	chaeta development	80	23	9.18	141	2.10E-05	0.00043	HS
887	GO:0007494	midgut development	36	14	4.13	122	2.10E-05	0.00029	HS
888	GO:0070848	response to growth factor	102	27	11.7	2975	2.20E-05	1	HS
889	GO:0007098	centrosome cycle	75	22	8.61	1266	2.20E-05	0.1861	HS
890	GO:0007304	chorion-containing eggshell formation	125	31	14.34	1815	2.30E-05	0.36741	HS
891	GO:0007026	negative regulation of microtubule depol...	10	7	1.15	69	2.30E-05	2.30E-05	HS
892	GO:0035151	regulation of tube size, open tracheal s...	50	17	5.74	664	2.30E-05	0.06617	HS
893	GO:0008589	regulation of smoothened signaling pathw...	86	24	9.87	2976	2.40E-05	1	HS
894	GO:0008544	epidermis development	65	20	7.46	1262	2.40E-05	0.18482	HS
895	GO:0018022	peptidyl-lysine methylation	65	20	7.46	2977	2.40E-05	1	HS
896	GO:0007019	microtubule depolymerization	20	10	2.29	1838	2.40E-05	0.38422	HS
897	GO:0007390	germ-band shortening	20	10	2.29	70	2.40E-05	2.40E-05	HS
898	GO:0035099	hemocyte migration	20	10	2.29	71	2.40E-05	2.40E-05	HS
899	GO:0016325	oocyte microtubule cytoskeleton organiza...	32	13	3.67	113	2.40E-05	0.00023	HS
900	GO:0032456	endocytic recycling	32	13	3.67	143	2.40E-05	0.00051	HS
901	GO:0036099	female germ-line stem cell population ma...	32	13	3.67	72	2.40E-05	2.40E-05	HS
902	GO:0043409	negative regulation of MAPK cascade	41	15	4.7	2978	2.50E-05	1	HS
903	GO:0055059	asymmetric neuroblast division	41	15	4.7	600	2.50E-05	0.04011	HS
904	GO:0046666	retinal cell programmed cell death	28	12	3.21	2979	2.60E-05	1	HS
905	GO:0051294	establishment of spindle orientation	28	12	3.21	1619	2.60E-05	0.30466	HS
906	GO:0071396	cellular response to lipid	28	12	3.21	2980	2.60E-05	1	HS
907	GO:1901987	regulation of cell cycle phase transitio...	103	27	11.82	1327	2.60E-05	0.21417	HS
908	GO:0031349	positive regulation of defense response	92	25	10.56	2981	2.70E-05	1	HS
909	GO:0043297	apical junction assembly	46	16	5.28	2982	2.80E-05	1	HS
910	GO:0006397	mRNA processing	344	65	39.47	667	3.00E-05	0.0665	HS
911	GO:0051298	centrosome duplication	37	14	4.25	1178	3.00E-05	0.14286	HS
912	GO:0045732	positive regulation of protein catabolic...	61	19	7	451	3.10E-05	0.02156	HS
913	GO:0050829	defense response to Gram-negative bacter...	127	31	14.57	106	3.10E-05	0.00012	HS
914	GO:0002168	instar larval development	77	22	8.84	598	3.40E-05	0.03974	HS
915	GO:0002759	regulation of antimicrobial humoral resp...	77	22	8.84	2983	3.40E-05	1	HS
916	GO:0042048	olfactory behavior	77	22	8.84	2143	3.40E-05	0.52594	HS
917	GO:0040040	thermosensory behavior	17	9	1.95	75	3.50E-05	3.50E-05	HS
918	GO:0045571	negative regulation of imaginal disc gro...	17	9	1.95	76	3.50E-05	3.50E-05	HS
919	GO:0045886	negative regulation of synaptic growth a...	42	15	4.82	79	3.50E-05	3.50E-05	HS
789	GO:0035150	regulation of tube size	55	19	6.31	2921	5.80E-06	1	HS
921	GO:1904397	negative regulation of neuromuscular jun...	42	15	4.82	2985	3.50E-05	1	HS
922	GO:0001704	formation of primary germ layer	33	13	3.79	2986	3.50E-05	1	HS
923	GO:0061640	cytoskeleton-dependent cytokinesis	105	27	12.05	2987	3.80E-05	1	HS
924	GO:0000281	mitotic cytokinesis	67	20	7.69	137	3.90E-05	0.00038	HS
925	GO:0008298	intracellular mRNA localization	83	23	9.52	1245	3.90E-05	0.17722	HS
926	GO:0007614	short-term memory	29	12	3.33	80	4.00E-05	4.00E-05	HS
927	GO:0006401	RNA catabolic process	111	28	12.74	2988	4.00E-05	1	HS
928	GO:0006898	receptor-mediated endocytosis	52	17	5.97	783	4.00E-05	0.10265	HS
929	GO:0018105	peptidyl-serine phosphorylation	52	17	5.97	97	4.00E-05	9.00E-05	HS
930	GO:0042745	circadian sleep/wake cycle	52	17	5.97	1332	4.00E-05	0.2148	HS
931	GO:0035146	tube fusion	21	10	2.41	2989	4.10E-05	1	HS
932	GO:0035147	branch fusion, open tracheal system	21	10	2.41	81	4.10E-05	4.10E-05	HS
933	GO:0099504	synaptic vesicle cycle	117	29	13.43	2990	4.10E-05	1	HS
934	GO:0070303	negative regulation of stress-activated ...	25	11	2.87	850	4.20E-05	0.11414	HS
935	GO:1901990	regulation of mitotic cell cycle phase t...	100	26	11.47	2991	4.30E-05	1	HS
936	GO:0090087	regulation of peptide transport	78	22	8.95	2992	4.30E-05	1	HS
937	GO:0019538	protein metabolic process	2911	394	334.03	836	4.40E-05	0.10819	HS
938	GO:0044248	cellular catabolic process	936	146	107.4	2993	4.50E-05	1	HS
939	GO:0009950	dorsal/ventral axis specification	73	21	8.38	740	4.60E-05	0.08226	HS
940	GO:0030720	oocyte localization involved in germariu...	14	8	1.61	82	4.70E-05	4.70E-05	HS
941	GO:0043069	negative regulation of programmed cell d...	112	28	12.85	1831	4.70E-05	0.38246	HS
942	GO:0008258	head involution	43	15	4.93	83	4.90E-05	4.90E-05	HS
943	GO:0035330	regulation of hippo signaling	43	15	4.93	2994	4.90E-05	1	HS
944	GO:0008543	fibroblast growth factor receptor signal...	34	13	3.9	208	5.10E-05	0.00211	HS
945	GO:0044344	cellular response to fibroblast growth f...	34	13	3.9	2995	5.10E-05	1	HS
946	GO:0071774	response to fibroblast growth factor	34	13	3.9	2996	5.10E-05	1	HS
947	GO:0030833	regulation of actin filament polymerizat...	58	18	6.66	492	5.30E-05	0.02875	HS
948	GO:0042176	regulation of protein catabolic process	79	22	9.06	2997	5.30E-05	1	HS
949	GO:0001742	oenocyte differentiation	11	7	1.26	189	5.60E-05	0.0015	HS
950	GO:0098534	centriole assembly	30	12	3.44	849	5.90E-05	0.1141	HS
951	GO:0023061	signal release	143	33	16.41	2998	5.90E-05	1	HS
952	GO:0045887	positive regulation of synaptic growth a...	39	14	4.48	91	6.00E-05	6.00E-05	HS
953	GO:0061572	actin filament bundle organization	39	14	4.48	1835	6.00E-05	0.38379	HS
954	GO:0034470	ncRNA processing	264	52	30.29	2999	6.10E-05	1	HS
955	GO:0018958	phenol-containing compound metabolic pro...	69	20	7.92	3000	6.20E-05	1	HS
956	GO:0051223	regulation of protein transport	69	20	7.92	3001	6.20E-05	1	HS
957	GO:0010669	epithelial structure maintenance	26	11	2.98	2087	6.50E-05	0.51667	HS
958	GO:0031060	regulation of histone methylation	26	11	2.98	3002	6.50E-05	1	HS
959	GO:0051491	positive regulation of filopodium assemb...	26	11	2.98	92	6.50E-05	6.50E-05	HS
960	GO:0030041	actin filament polymerization	64	19	7.34	2083	6.50E-05	0.51566	HS
961	GO:0007059	chromosome segregation	187	40	21.46	610	6.50E-05	0.04527	HS
962	GO:0036445	neuronal stem cell division	44	15	5.05	3003	6.60E-05	1	HS
963	GO:0055057	neuroblast division	44	15	5.05	3004	6.60E-05	1	HS
964	GO:0000132	establishment of mitotic spindle orienta...	22	10	2.52	93	6.70E-05	6.70E-05	HS
965	GO:0009826	unidimensional cell growth	22	10	2.52	3005	6.70E-05	1	HS
966	GO:0022411	cellular component disassembly	150	34	17.21	3006	6.80E-05	1	HS
967	GO:0035317	imaginal disc-derived wing hair organiza...	49	16	5.62	155	6.90E-05	0.00068	HS
968	GO:0031346	positive regulation of cell projection o...	75	21	8.61	3007	7.10E-05	1	HS
969	GO:0007379	segment specification	35	13	4.02	74	7.30E-05	2.60E-05	HS
970	GO:0051017	actin filament bundle assembly	35	13	4.02	305	7.30E-05	0.00897	HS
971	GO:0043065	positive regulation of apoptotic process	70	20	8.03	146	7.70E-05	0.00055	HS
972	GO:0007224	smoothened signaling pathway	92	24	10.56	3008	7.80E-05	1	HS
973	GO:0007455	eye-antennal disc morphogenesis	40	14	4.59	135	8.30E-05	0.00035	HS
974	GO:0050802	circadian sleep/wake cycle, sleep	40	14	4.59	187	8.30E-05	0.00149	HS
975	GO:0016476	regulation of embryonic cell shape	31	12	3.56	188	8.70E-05	0.00149	HS
976	GO:0046661	male sex differentiation	31	12	3.56	3009	8.70E-05	1	HS
977	GO:0110111	negative regulation of animal organ morp...	31	12	3.56	3010	8.70E-05	1	HS
978	GO:0120034	positive regulation of plasma membrane b...	31	12	3.56	3011	8.70E-05	1	HS
979	GO:0055088	lipid homeostasis	76	21	8.72	249	8.80E-05	0.00494	HS
980	GO:0018209	peptidyl-serine modification	55	17	6.31	3012	9.00E-05	1	HS
981	GO:0048859	formation of anatomical boundary	55	17	6.31	3013	9.00E-05	1	HS
982	GO:0009047	dosage compensation by hyperactivation o...	15	8	1.72	124	9.00E-05	0.00031	HS
983	GO:0030725	germline ring canal formation	15	8	1.72	854	9.00E-05	0.11429	HS
984	GO:0031114	regulation of microtubule depolymerizati...	15	8	1.72	1988	9.00E-05	0.45487	HS
985	GO:0035315	hair cell differentiation	50	16	5.74	3014	9.10E-05	1	HS
986	GO:0035316	non-sensory hair organization	50	16	5.74	3015	9.10E-05	1	HS
987	GO:1901991	negative regulation of mitotic cell cycl...	50	16	5.74	3016	9.10E-05	1	HS
988	GO:1905952	regulation of lipid localization	50	16	5.74	3017	9.10E-05	1	HS
989	GO:0035162	embryonic hemopoiesis	27	11	3.1	2161	9.90E-05	0.57185	HS
990	GO:0035159	regulation of tube length, open tracheal...	36	13	4.13	183	0.0001	0.00122	HS
991	GO:0007406	negative regulation of neuroblast prolif...	19	9	2.18	103	0.00011	0.00011	HS
992	GO:0031507	heterochromatin assembly	19	9	2.18	1184	0.00011	0.14339	HS
993	GO:2000178	negative regulation of neural precursor ...	19	9	2.18	3018	0.00011	1	HS
994	GO:0045666	positive regulation of neuron differenti...	88	23	10.1	1777	0.00011	0.31732	HS
995	GO:0097479	synaptic vesicle localization	88	23	10.1	1329	0.00011	0.21452	HS
996	GO:0014065	phosphatidylinositol 3-kinase signaling	23	10	2.64	787	0.00011	0.10314	HS
997	GO:0036315	cellular response to sterol	23	10	2.64	3019	0.00011	1	HS
998	GO:0046329	negative regulation of JNK cascade	23	10	2.64	109	0.00011	0.00017	HS
999	GO:0070374	positive regulation of ERK1 and ERK2 cas...	23	10	2.64	104	0.00011	0.00011	HS
[truncated: 1 more rows]
