# Supplementary material for: Multiscale analysis reveals that diet-dependent midgut plasticity emerges from alterations in both stem cell niche coupling and enterocyte size
Source: eLife. 2021 Sep 23;10:e64125. doi: 10.7554/eLife.64125 (PMC8528489; doi:10.7554/eLife.64125)
Supplement: Figure 5—source data 4. [file elife-64125-fig5-data4.csv]

Fbgn	Gene symbol	baseMean	log2FoldChange	lfcSE	stat	pvalue	padj
FBgn0020906	Jon25Bi	49982.88317	-4.567469851	0.24651015	-18.5285265	1.22E-76	1.08E-72
FBgn0035886	Jon66Ci	1975.99253	-4.505007846	0.253258472	-17.78818223	8.73E-71	3.87E-67
FBgn0031654	Jon25Bii	20373.07367	-3.192736362	0.205246648	-15.55560781	1.46E-54	4.31E-51
FBgn0031248	CG11912	608.8311856	-2.15932896	0.147096765	-14.67964959	8.70E-49	1.93E-45
FBgn0036927	CG7433	141.7043751	-3.257487734	0.222423276	-14.64544446	1.44E-48	2.55E-45
FBgn0053265	Muc68E	290.9829627	3.058988718	0.21669286	14.11670288	3.00E-45	4.43E-42
FBgn0031653	Jon25Biii	65521.17619	-2.468286557	0.187599961	-13.15718057	1.55E-39	1.96E-36
FBgn0028533	CG7953	23815.2146	-2.82881382	0.216270853	-13.07995869	4.29E-39	4.75E-36
FBgn0037913	fabp	3724.872235	-1.620276012	0.12578484	-12.88132988	5.73E-38	5.65E-35
FBgn0261675	Npc1b	824.9637388	-2.626982102	0.205938872	-12.7561255	2.88E-37	2.55E-34
FBgn0004428	LysE	6997.246983	-2.847335105	0.224632031	-12.67555249	8.08E-37	6.51E-34
FBgn0004425	LysB	11381.75352	-1.870932645	0.149715147	-12.49661564	7.79E-36	5.75E-33
FBgn0001285	Jon44E	2455.568151	-2.163123596	0.173567259	-12.46273982	1.19E-35	8.13E-33
FBgn0027572	CG5009	147.2997433	-1.632447166	0.13284469	-12.28838856	1.05E-34	6.62E-32
FBgn0033294	Mal-A4	1046.707249	-2.966405709	0.243008437	-12.20700707	2.85E-34	1.68E-31
FBgn0031143	CG1532	1087.646569	-1.587171932	0.130734682	-12.14040463	6.45E-34	3.57E-31
FBgn0039768	CG15533	508.6795074	-2.662260888	0.221778457	-12.00414559	3.38E-33	1.76E-30
FBgn0034318	CG14500	3242.415344	-1.1863014	0.099794866	-11.88739906	1.38E-32	6.78E-30
FBgn0038257	smp-30	2099.482121	-3.310757456	0.279528181	-11.84409186	2.31E-32	1.08E-29
FBgn0010358	deltaTry	1277.769059	-3.23866243	0.28176236	-11.49430475	1.41E-30	6.24E-28
FBgn0038973	Pebp1	8971.206095	-2.520344561	0.219707575	-11.47135942	1.84E-30	7.75E-28
FBgn0035926	CG5804	16144.66658	-1.537832887	0.136360957	-11.27766274	1.69E-29	6.81E-27
FBgn0043576	PGRP-SC1a	496.4884067	-2.244205079	0.199574278	-11.24496151	2.45E-29	9.45E-27
FBgn0011555	thetaTry	6884.425772	-1.099334545	0.098526657	-11.15773724	6.56E-29	2.42E-26
FBgn0034488	CG11208	874.1858763	-1.831233037	0.164190746	-11.15308311	6.92E-29	2.45E-26
FBgn0086254	CG6084	412.5888979	-2.296362418	0.206045681	-11.14491897	7.58E-29	2.58E-26
FBgn0034642	CG15674	556.7910993	-1.563411604	0.141326115	-11.06243952	1.91E-28	6.26E-26
FBgn0025700	CG5885	587.5059797	-1.406682342	0.127365578	-11.04444673	2.33E-28	7.38E-26
FBgn0038082	CG5724	301.2585957	-1.706888901	0.155627048	-10.96781645	5.46E-28	1.67E-25
FBgn0262512	Vha14-1	1565.341496	-1.086016975	0.099457025	-10.91945966	9.30E-28	2.75E-25
FBgn0035887	Jon66Cii	95.07587236	-3.987205455	0.365273825	-10.91566156	9.70E-28	2.77E-25
FBgn0051410	Npc2e	4818.378939	-2.621753678	0.240574284	-10.89789663	1.18E-27	3.27E-25
FBgn0003358	Jon99Ci	14809.71534	-3.23572907	0.298138997	-10.853089	1.93E-27	4.88E-25
FBgn0035667	Jon65Ai	5275.570167	-2.406041607	0.221588941	-10.85813036	1.82E-27	4.88E-25
FBgn0038020	GstD9	997.2644176	-3.292553087	0.303302793	-10.8556636	1.87E-27	4.88E-25
FBgn0038756	CG4783	2887.769174	-0.794872404	0.074043457	-10.73521458	6.96E-27	1.71E-24
FBgn0053306	CG33306	1503.616133	-2.00298949	0.187358352	-10.69068694	1.13E-26	2.70E-24
FBgn0004427	LysD	49354.42161	-1.600205573	0.15234807	-10.50361567	8.31E-26	1.94E-23
FBgn0028920	CG8997	42255.02893	-2.221121742	0.212168107	-10.46868813	1.20E-25	2.73E-23
FBgn0033812	Pex13	179.4758116	-1.173491725	0.113002514	-10.38465145	2.91E-25	6.45E-23
FBgn0034784	CG9826	63.04965211	-2.030140549	0.196440355	-10.33464101	4.91E-25	1.06E-22
FBgn0034783	CG9825	189.5172655	-2.252369257	0.220659594	-10.20743862	1.84E-24	3.87E-22
FBgn0031049	Sec61gamma	506.6070701	-1.384898871	0.135845991	-10.19462452	2.10E-24	4.32E-22
FBgn0033327	PGRP-SC1b	1450.397303	-1.649986436	0.16220534	-10.17220788	2.64E-24	5.24E-22
FBgn0263773	fok	1611.410432	2.249493442	0.22115855	10.17140618	2.66E-24	5.24E-22
FBgn0002869	MtnB	1146.791677	-3.208234115	0.319779369	-10.03264884	1.10E-23	2.11E-21
FBgn0039472	CG17192	3251.765973	-2.09780442	0.21145485	-9.920814849	3.38E-23	6.37E-21
FBgn0053129	CG33129	303.9340552	-1.139869224	0.114949591	-9.916252959	3.54E-23	6.53E-21
FBgn0024947	NTPase	299.0418846	-1.071693156	0.109313863	-9.803817417	1.08E-22	1.96E-20
FBgn0034429	CG18607	109.5562347	-4.154907977	0.424506917	-9.787609613	1.27E-22	2.26E-20
FBgn0030593	CG9512	134.0843419	-2.535452709	0.260519899	-9.732280393	2.20E-22	3.82E-20
FBgn0042206	GstD10	206.0477745	-2.177118027	0.224211349	-9.710115194	2.73E-22	4.65E-20
FBgn0003356	Jon99Cii	18622.64094	-1.68155738	0.174393959	-9.642291433	5.30E-22	8.86E-20
FBgn0250836	CG8628	4406.9036	-2.089694103	0.217655782	-9.600912439	7.92E-22	1.30E-19
FBgn0028532	CG7968	2388.267056	-2.316743513	0.24330118	-9.522121959	1.70E-21	2.73E-19
FBgn0040342	CG3706	1018.881043	-1.239989347	0.131009761	-9.464862263	2.94E-21	4.65E-19
FBgn0035006	CG4563	288.4609578	-2.523350457	0.267135592	-9.445953791	3.52E-21	5.47E-19
FBgn0033649	pyr	108.0723723	2.038166301	0.217098513	9.388209406	6.10E-21	9.32E-19
FBgn0038479	CG17477	73.40871762	-1.834187968	0.195478685	-9.383058663	6.41E-21	9.62E-19
FBgn0026084	cib	476.0657514	1.405585805	0.149897102	9.377004561	6.79E-21	1.00E-18
FBgn0010638	Sec61beta	1126.325371	-1.139475227	0.12171799	-9.361600732	7.85E-21	1.14E-18
FBgn0086355	Tpi	438.5083867	-1.065095091	0.113917878	-9.349674597	8.79E-21	1.26E-18
FBgn0004654	Pgd	490.3320969	-1.759441019	0.189591402	-9.280173065	1.69E-20	2.37E-18
FBgn0027073	CG4302	946.216359	-1.570499139	0.16925262	-9.279024089	1.71E-20	2.37E-18
FBgn0002578	Kaz-m1	2087.001117	-0.736393757	0.079437628	-9.270087478	1.86E-20	2.54E-18
FBgn0031249	CG11911	11850.10566	-1.026593384	0.110858927	-9.260358251	2.04E-20	2.74E-18
FBgn0002571	Mal-A3	1189.463308	-1.930912461	0.208946795	-9.241168117	2.44E-20	3.22E-18
FBgn0037592	CG11737	170.5557797	-1.237113878	0.133919246	-9.237760178	2.52E-20	3.28E-18
FBgn0028534	CG7916	9290.071943	-2.439897566	0.26589869	-9.17604207	4.47E-20	5.74E-18
FBgn0033733	CG8834	6617.43642	-1.541774948	0.169027705	-9.121433369	7.41E-20	9.38E-18
FBgn0003357	Jon99Ciii	113667.2769	-2.490492287	0.273347651	-9.111079889	8.16E-20	1.02E-17
FBgn0063493	GstE7	344.9629129	-2.273120603	0.249772185	-9.100775567	8.97E-20	1.10E-17
FBgn0039475	CG6277	962.0415021	-2.631425536	0.289212148	-9.098599608	9.15E-20	1.11E-17
FBgn0001149	GstD1	3275.715544	-1.704739999	0.18787805	-9.073651783	1.15E-19	1.38E-17
FBgn0001091	Gapdh1	905.0358605	-1.127053788	0.124628787	-9.043286197	1.52E-19	1.80E-17
FBgn0015541	sda	119.348148	2.252681911	0.249429352	9.031342523	1.70E-19	1.98E-17
FBgn0015033	Cyp4d8	181.8377608	-1.706803374	0.189040559	-9.028768112	1.74E-19	2.00E-17
FBgn0030098	CG12057	3399.67981	-2.610209339	0.290127002	-8.996781833	2.32E-19	2.64E-17
FBgn0052669	CG32669	160.1253827	-1.449241201	0.161374257	-8.980621995	2.69E-19	3.02E-17
FBgn0050069	CG30069	42.92488863	2.199414629	0.245752847	8.949701535	3.56E-19	3.90E-17
FBgn0051269	CG31269	196.3465733	-1.50173744	0.167780146	-8.950626597	3.53E-19	3.90E-17
FBgn0040493	grsm	128.6253098	-1.146463673	0.12833775	-8.93317575	4.14E-19	4.47E-17
FBgn0039471	CG6295	14934.05141	-1.345966846	0.150742301	-8.928925958	4.30E-19	4.59E-17
FBgn0028663	VhaM9.7-b	2495.485254	-0.882714349	0.099195496	-8.89873418	5.65E-19	5.96E-17
FBgn0039580	Gfat2	287.3705797	-1.238432991	0.139799734	-8.858621935	8.10E-19	8.45E-17
FBgn0010113	hdc	109.0475969	1.858668	0.210764253	8.818706068	1.16E-18	1.18E-16
FBgn0025678	CaBP1	273.1568584	-1.461337039	0.165687743	-8.819825844	1.15E-18	1.18E-16
FBgn0036024	CG18180	46477.30845	-2.633980524	0.298816886	-8.814697729	1.20E-18	1.21E-16
FBgn0001248	Idh	1786.097178	-1.019342659	0.115733549	-8.807667871	1.28E-18	1.27E-16
FBgn0032066	LManIII	318.3545332	-3.06937271	0.351672112	-8.727938919	2.59E-18	2.55E-16
FBgn0283499	InR	152.0104031	1.772223519	0.203878007	8.692568398	3.54E-18	3.45E-16
FBgn0020506	Amyrel	77.62163017	-3.829989575	0.441958397	-8.665950471	4.48E-18	4.31E-16
FBgn0259734	Nost	365.971685	1.167071912	0.134787109	8.658631517	4.77E-18	4.55E-16
FBgn0034405	Jheh2	259.4556209	-1.698917224	0.19635025	-8.65248312	5.04E-18	4.75E-16
FBgn0029648	CG3603	94.58318976	-1.850362841	0.214225089	-8.63747029	5.75E-18	5.36E-16
FBgn0015808	ScpX	475.1345749	-1.351526277	0.156546426	-8.633389518	5.96E-18	5.50E-16
FBgn0052982	CG32982	59.66113332	1.956188987	0.226617466	8.632119251	6.02E-18	5.50E-16
FBgn0263289	scrib	393.1047919	1.420733115	0.166237949	8.546382594	1.27E-17	1.15E-15
FBgn0263260	sel	275.4067817	-1.175176394	0.137575527	-8.542045355	1.32E-17	1.18E-15
FBgn0032144	CG17633	10979.14907	-0.737696813	0.086473576	-8.530892885	1.45E-17	1.29E-15
FBgn0036398	upSET	227.1480386	1.882835577	0.22099724	8.519724397	1.60E-17	1.40E-15
FBgn0010357	betaTry	54294.80866	-0.722331184	0.085100219	-8.488006207	2.10E-17	1.83E-15
FBgn0264975	Nrg	111.3001381	1.467208759	0.17315554	8.47335729	2.38E-17	2.05E-15
FBgn0027932	Akap200	206.0832786	2.04398251	0.24170909	8.456374189	2.76E-17	2.35E-15
FBgn0028945	CG7631	529.9788933	-1.752648771	0.208158437	-8.419782548	3.77E-17	3.18E-15
FBgn0250815	Jon65Aiv	79665.0459	-1.46142908	0.17370528	-8.413268029	3.99E-17	3.33E-15
FBgn0030026	sni	155.1811694	-1.172632035	0.140245629	-8.361273297	6.20E-17	5.14E-15
FBgn0086450	su(r)	167.142458	-1.300813552	0.155846316	-8.346771262	7.02E-17	5.76E-15
FBgn0004369	Ptp99A	57.10920611	1.570659365	0.188248126	8.343559092	7.21E-17	5.86E-15
FBgn0283450	Glo1	945.6746628	-0.980895895	0.117972081	-8.314644352	9.20E-17	7.41E-15
FBgn0002780	mod	149.501543	1.674214722	0.201570688	8.305844146	9.91E-17	7.91E-15
FBgn0040349	CG3699	347.2702134	-2.107218368	0.254380902	-8.283712936	1.19E-16	9.45E-15
FBgn0047135	CG32276	1465.758867	-1.085234508	0.131178811	-8.272940567	1.31E-16	1.02E-14
FBgn0063497	GstE3	1111.203888	-1.968652975	0.23848923	-8.25468293	1.52E-16	1.18E-14
FBgn0053192	MtnD	1158.591061	-2.322059783	0.282632801	-8.215818447	2.11E-16	1.62E-14
FBgn0031913	CG5958	595.6786173	-1.315744895	0.161053649	-8.169606252	3.09E-16	2.36E-14
FBgn0040383	CG5254	690.6819673	-1.311117117	0.160663518	-8.160639906	3.33E-16	2.52E-14
FBgn0032076	CG9510	247.4157644	-1.425294429	0.174897248	-8.149324507	3.66E-16	2.75E-14
FBgn0010425	epsilonTry	33949.56786	-1.36205996	0.167653858	-8.124238703	4.50E-16	3.35E-14
FBgn0035625	Blimp-1	316.6086916	1.510825969	0.186179029	8.114909475	4.86E-16	3.59E-14
FBgn0025366	Ip259	970.7020863	1.075148194	0.132856461	8.092554793	5.84E-16	4.28E-14
FBgn0259998	CG17571	21477.84758	-1.45510866	0.18017984	-8.075868307	6.70E-16	4.87E-14
FBgn0063491	GstE9	952.0875728	-1.115435967	0.138891237	-8.031003197	9.67E-16	6.96E-14
FBgn0037607	CG8036	384.6120596	-0.754646367	0.094019508	-8.026487102	1.00E-15	7.17E-14
FBgn0035252	CG7970	883.8629722	-0.838788799	0.104637629	-8.016129612	1.09E-15	7.74E-14
FBgn0034588	CG9394	732.7341788	-1.02016093	0.127351279	-8.010606069	1.14E-15	8.03E-14
FBgn0010038	GstD2	79.95148924	-3.034885413	0.379119164	-8.005096287	1.19E-15	8.33E-14
FBgn0086357	Sec61alpha	936.1979957	-0.858250016	0.107280173	-8.000080426	1.24E-15	8.61E-14
FBgn0005670	Cyp4d1	472.632662	-1.273801178	0.159298272	-7.996327667	1.28E-15	8.81E-14
FBgn0037354	CG12171	566.2687961	-1.286345663	0.161308848	-7.974427173	1.53E-15	1.04E-13
FBgn0262735	Imp	261.209457	1.561811783	0.196061705	7.965919611	1.64E-15	1.11E-13
FBgn0012036	Aldh	1270.662404	-1.236426365	0.15578274	-7.936863623	2.07E-15	1.39E-13
FBgn0265434	zip	1118.667831	1.670181059	0.210816512	7.922439484	2.33E-15	1.55E-13
FBgn0031860	CG11236	210.2272095	-1.019413167	0.128819181	-7.913520043	2.50E-15	1.65E-13
FBgn0010053	Jheh1	694.4240196	-0.897810624	0.113649208	-7.899840564	2.79E-15	1.83E-13
FBgn0085446	CG34417	823.8530537	1.282678628	0.163015745	7.868434003	3.59E-15	2.34E-13
FBgn0037870	CG18577	180.3201873	-1.340157531	0.170381615	-7.865622881	3.67E-15	2.38E-13
FBgn0035909	ergic53	551.8760098	-0.856949208	0.109021472	-7.860370949	3.83E-15	2.46E-13
FBgn0036124	CG7839	87.57993678	1.375859343	0.175176166	7.854146903	4.03E-15	2.57E-13
FBgn0040336	Seipin	149.3476151	-1.087782498	0.138808507	-7.836569376	4.63E-15	2.93E-13
FBgn0037749	CG9471	115.5749222	-1.051945864	0.134504764	-7.82088184	5.25E-15	3.30E-13
FBgn0267002	unc-104	75.1438562	1.625586759	0.207901782	7.819013107	5.32E-15	3.32E-13
FBgn0034742	CG4294	41.38620946	1.839269863	0.237440415	7.746237567	9.47E-15	5.87E-13
FBgn0263995	cpo	139.7887587	1.886679427	0.243750162	7.740218144	9.92E-15	6.11E-13
FBgn0030234	CG15211	538.8838973	-0.77947165	0.100799662	-7.732879583	1.05E-14	6.40E-13
FBgn0039756	CG9743	933.4146357	-1.0274145	0.132870019	-7.73247802	1.05E-14	6.40E-13
FBgn0000579	Eno	992.0816837	-0.882508797	0.114187186	-7.728614983	1.09E-14	6.55E-13
FBgn0029932	CG4607	1382.106565	-1.518540938	0.196563175	-7.725459964	1.11E-14	6.67E-13
FBgn0262656	Myc	866.4544802	1.189697546	0.154078027	7.721396563	1.15E-14	6.84E-13
FBgn0030615	Cyp4s3	27.2256673	-2.868719482	0.371863	-7.71445258	1.22E-14	7.18E-13
FBgn0030968	CG7322	82.28922051	-1.410031859	0.18332879	-7.691273471	1.46E-14	8.55E-13
FBgn0000556	Ef1alpha48D	5057.900773	0.997232645	0.129676051	7.690183632	1.47E-14	8.57E-13
FBgn0034394	CG15096	1874.861491	-0.95932575	0.125056065	-7.6711653	1.70E-14	9.87E-13
FBgn0063492	GstE8	271.7959015	-1.688380282	0.220179845	-7.668187271	1.74E-14	1.00E-12
FBgn0033792	CG13325	193.2266099	-1.904101086	0.248435167	-7.664378226	1.80E-14	1.03E-12
FBgn0030362	regucalcin	172.5665794	-1.616309519	0.211013149	-7.659757364	1.86E-14	1.06E-12
FBgn0031929	CG18585	1037.480114	-1.025028536	0.133894953	-7.655468042	1.93E-14	1.09E-12
FBgn0026577	CG8677	111.0286596	1.505558775	0.196811183	7.649762328	2.01E-14	1.13E-12
FBgn0003074	Pgi	347.0172169	-1.024068276	0.133928987	-7.646352756	2.07E-14	1.15E-12
FBgn0040153	l(1)G0469	619.3988287	1.16852252	0.15280962	7.64691724	2.06E-14	1.15E-12
FBgn0031069	Pmp70	1235.928789	-1.034717735	0.135839067	-7.617232345	2.59E-14	1.43E-12
FBgn0036271	Pbgs	98.48540339	-1.213548958	0.15964702	-7.601450718	2.93E-14	1.60E-12
FBgn0011016	SsRbeta	1321.703172	-1.019881443	0.134248508	-7.596966693	3.03E-14	1.65E-12
FBgn0033221	CG12825	1777.08371	-0.990073579	0.13035373	-7.595283816	3.07E-14	1.66E-12
FBgn0020508	Ag5r2	2801.531484	-2.315782259	0.304951411	-7.593938491	3.10E-14	1.67E-12
FBgn0036820	CG6852	899.7233978	-0.962699564	0.126869933	-7.588082863	3.25E-14	1.73E-12
FBgn0035588	CG10672	1453.08497	-1.348074571	0.177704952	-7.586027057	3.30E-14	1.75E-12
FBgn0038407	CG6126	41.17825926	-1.944291808	0.256538863	-7.578936716	3.48E-14	1.84E-12
FBgn0024321	NK7.1	116.905291	1.402394408	0.185341109	7.566558847	3.83E-14	2.01E-12
FBgn0000078	Amy-d	11839.90308	-1.847835607	0.244874868	-7.546040233	4.49E-14	2.34E-12
FBgn0250820	meigo	110.7244772	-1.171225742	0.155269363	-7.543186384	4.59E-14	2.38E-12
FBgn0036921	RhoGDI	344.9027756	-0.709947715	0.094276113	-7.530515342	5.05E-14	2.60E-12
FBgn0037636	CG9821	1969.106749	2.005331396	0.266437011	7.526474614	5.21E-14	2.67E-12
FBgn0051636	CG31636	270.9246812	-1.201290239	0.159724737	-7.521003094	5.44E-14	2.77E-12
FBgn0038098	CG7381	978.9888675	-2.321527837	0.308746846	-7.519195313	5.51E-14	2.79E-12
FBgn0028550	Atf3	202.7827979	1.719894724	0.22880872	7.516735915	5.62E-14	2.83E-12
FBgn0038481	CG17475	985.636767	-1.184448411	0.157624923	-7.514347285	5.72E-14	2.86E-12
FBgn0000454	Dip-B	539.0017514	-0.898143056	0.119652623	-7.506254649	6.08E-14	3.03E-12
FBgn0036333	MICAL-like	112.9417241	1.394904624	0.186304119	7.487245211	7.03E-14	3.48E-12
FBgn0030731	Mfe2	1825.79489	-1.152681476	0.154108232	-7.479687896	7.45E-14	3.67E-12
FBgn0085261	CG34232	358.3840151	1.139935364	0.152837546	7.458477292	8.75E-14	4.29E-12
FBgn0034628	Acox57D-p	285.1019357	-1.03407287	0.138758149	-7.45233978	9.17E-14	4.46E-12
FBgn0011770	Gip	1019.086241	-1.530514528	0.205483352	-7.448362658	9.45E-14	4.58E-12
FBgn0033121	Cyp6u1	171.6034186	-0.938726122	0.12623144	-7.436547698	1.03E-13	4.98E-12
FBgn0020497	emb	127.3239457	1.41840334	0.191085445	7.422874831	1.15E-13	5.49E-12
FBgn0030519	CG11151	2410.903459	-1.409750403	0.190293596	-7.408291375	1.28E-13	6.09E-12
FBgn0036320	CG10943	593.3509306	-1.257395748	0.169746527	-7.407490273	1.29E-13	6.10E-12
FBgn0032715	CG17597	8232.482866	-1.661890665	0.224396696	-7.406038937	1.30E-13	6.13E-12
FBgn0035213	CG2199	48.22831453	1.723802454	0.232837521	7.403456468	1.33E-13	6.22E-12
FBgn0010041	GstD5	93.42133685	-2.467832459	0.33339562	-7.402114224	1.34E-13	6.25E-12
FBgn0086901	cv-c	134.4115849	1.091176345	0.147433457	7.401144695	1.35E-13	6.26E-12
FBgn0267911	trol	165.6154871	1.581293366	0.213760252	7.397508907	1.39E-13	6.40E-12
FBgn0038845	CG10827	2410.902897	-1.128293551	0.152597239	-7.393931608	1.43E-13	6.54E-12
FBgn0002121	l(2)gl	322.8565748	1.320761406	0.179227922	7.369172112	1.72E-13	7.84E-12
FBgn0040260	Ugt36Bc	1134.004269	-1.747112427	0.237164898	-7.366656891	1.75E-13	7.95E-12
FBgn0053965	CG33965	499.8345001	-1.062717379	0.1442817	-7.365572915	1.76E-13	7.97E-12
FBgn0063494	GstE6	118.0681801	-1.841761198	0.250476213	-7.35303833	1.94E-13	8.71E-12
FBgn0261574	kug	36.05755932	1.948812882	0.265081469	7.351750731	1.96E-13	8.75E-12
FBgn0262116	RNASEK	4164.824843	-1.12350874	0.152981426	-7.344085945	2.07E-13	9.22E-12
FBgn0033879	CG6543	582.3173996	-1.064664419	0.145099646	-7.337470848	2.18E-13	9.64E-12
FBgn0036023	CG18179	1064.140187	-2.434867849	0.331879756	-7.336596474	2.19E-13	9.66E-12
FBgn0025592	Gk1	384.9778909	-0.736278685	0.100668739	-7.313876093	2.60E-13	1.12E-11
FBgn0032067	LManIV	15.76111927	-3.164823	0.432581517	-7.316130885	2.55E-13	1.12E-11
FBgn0038972	CG7054	323.2136077	-0.738140776	0.10091911	-7.314182396	2.59E-13	1.12E-11
FBgn0086691	UK114	1116.645218	-1.687896823	0.230736367	-7.315261326	2.57E-13	1.12E-11
FBgn0260634	eIF4G2	112.2045072	1.542821594	0.210949354	7.313706171	2.60E-13	1.12E-11
FBgn0010043	GstD7	134.4217922	-2.417405917	0.330642737	-7.311232466	2.65E-13	1.13E-11
FBgn0033097	Zip42C.2	77.81493422	1.405861228	0.192359477	7.308510356	2.70E-13	1.15E-11
FBgn0046114	Gclm	994.6891507	-1.140699353	0.156425807	-7.292270864	3.05E-13	1.29E-11
FBgn0283461	Drs	137.9463334	3.703023937	0.508038454	7.288865455	3.13E-13	1.32E-11
FBgn0043575	PGRP-SC2	3249.338959	-1.510710871	0.207429912	-7.282994318	3.26E-13	1.37E-11
FBgn0053346	CG33346	791.4483925	1.21945016	0.167660934	7.273311269	3.51E-13	1.47E-11
FBgn0040060	yip7	64528.61909	-1.139347152	0.156747982	-7.268655951	3.63E-13	1.51E-11
FBgn0029801	CG15771	350.4779578	0.869764861	0.119951177	7.250990659	4.14E-13	1.71E-11
FBgn0262109	CR42862	895.5779055	2.398194463	0.330829539	7.249033659	4.20E-13	1.73E-11
FBgn0032305	CG6700	61.68443612	1.929065505	0.26626581	7.244886245	4.33E-13	1.76E-11
FBgn0037935	CG6834	119.825835	1.63099698	0.225122625	7.244926973	4.33E-13	1.76E-11
FBgn0061492	loj	237.2792754	-0.966712159	0.133434292	-7.244855446	4.33E-13	1.76E-11
FBgn0265998	Doa	32.72959126	2.129481028	0.294240473	7.237213167	4.58E-13	1.85E-11
FBgn0045866	bai	920.2257959	-0.818845991	0.113179035	-7.234961794	4.66E-13	1.88E-11
FBgn0023541	Cyp4d14	275.6894714	-1.95248746	0.270442021	-7.21961571	5.21E-13	2.09E-11
FBgn0263110	CG43367	51.18489278	1.654714872	0.229470172	7.211023796	5.55E-13	2.22E-11
FBgn0031930	CG7025	766.3615201	-1.135793693	0.157944892	-7.1910758	6.43E-13	2.55E-11
FBgn0030478	CG1640	1050.424313	-0.785599309	0.109299016	-7.18761558	6.59E-13	2.61E-11
FBgn0033688	Prp8	130.1016074	1.188816063	0.165426693	7.186361773	6.65E-13	2.62E-11
FBgn0034058	Pex11	307.5456307	-1.092726084	0.152138617	-7.18243732	6.85E-13	2.68E-11
FBgn0034490	CG9864	484.3912798	-1.203688756	0.16781111	-7.172878819	7.34E-13	2.87E-11
FBgn0034073	CG8414	20.99046438	2.385093639	0.332656152	7.169846778	7.51E-13	2.92E-11
FBgn0033774	CG12374	98461.46133	-0.965180991	0.134726286	-7.164013957	7.83E-13	3.03E-11
FBgn0003888	betaTub60D	115.631983	1.645059842	0.229747039	7.160309223	8.05E-13	3.10E-11
FBgn0003396	shn	119.6300295	1.219884897	0.17044815	7.156926581	8.25E-13	3.16E-11
FBgn0004432	Cyp1	3556.687233	-0.633396969	0.088700065	-7.140885096	9.27E-13	3.54E-11
FBgn0033826	CG4734	4056.845047	-1.633859083	0.229291669	-7.125680097	1.04E-12	3.94E-11
FBgn0020912	Ptx1	57.12032306	1.743597494	0.244908027	7.1193971	1.08E-12	4.10E-11
FBgn0013672	mt:ATPase6	27054.86408	-1.455353055	0.204560622	-7.114531827	1.12E-12	4.23E-11
FBgn0051075	CG31075	158.8059015	-1.872334353	0.263858147	-7.095988413	1.28E-12	4.82E-11
FBgn0033096	Zip42C.1	40.23953843	-2.450826497	0.345452157	-7.094546814	1.30E-12	4.85E-11
FBgn0040384	CG32795	305.1789346	-0.866730454	0.122453028	-7.078064686	1.46E-12	5.44E-11
FBgn0031418	CG3609	1280.435183	-2.507676424	0.35477325	-7.068392061	1.57E-12	5.81E-11
FBgn0011230	poe	50.27628786	1.690665915	0.239536599	7.058069301	1.69E-12	6.23E-11
FBgn0029768	SPR	31.06183867	3.193988394	0.453618272	7.041136993	1.91E-12	7.01E-11
FBgn0023507	D2hgdh	744.8224255	-0.844395436	0.120100146	-7.030761099	2.05E-12	7.52E-11
FBgn0262579	Ect4	260.2607144	1.314402698	0.186976378	7.029779452	2.07E-12	7.54E-11
FBgn0004426	LysC	337.3210929	-1.485418744	0.211817229	-7.012738048	2.34E-12	8.49E-11
FBgn0031801	CG9498	1288.563279	-1.323903617	0.188966526	-7.006021901	2.45E-12	8.87E-11
FBgn0004512	Mdr49	537.2757967	-0.923258654	0.131840594	-7.002840534	2.51E-12	9.03E-11
FBgn0030737	CG9914	153.8246793	-1.718830733	0.245604818	-6.99835919	2.59E-12	9.29E-11
FBgn0037846	CG6574	236.9459432	-1.203600352	0.172292915	-6.985779717	2.83E-12	1.01E-10
FBgn0037098	Wnk	61.91233601	2.063760471	0.295634151	6.980791848	2.94E-12	1.04E-10
FBgn0259745	wech	68.87625017	1.122213356	0.161036747	6.968678728	3.20E-12	1.13E-10
FBgn0015513	mbc	55.40057018	1.533750011	0.220571773	6.953518975	3.56E-12	1.26E-10
FBgn0037073	Tsr1	73.48119085	1.396621468	0.20127743	6.938788248	3.95E-12	1.39E-10
FBgn0033222	CG12824	260.4799154	-1.08934158	0.157040836	-6.936677162	4.01E-12	1.40E-10
FBgn0053926	CG33926	1024.816646	-1.735038135	0.250137846	-6.936327947	4.02E-12	1.40E-10
FBgn0262125	Sec23	309.955087	-0.876383937	0.126632257	-6.920700592	4.49E-12	1.56E-10
FBgn0001257	ImpL2	181.3279199	2.568968283	0.37159817	6.913296374	4.74E-12	1.64E-10
FBgn0034728	rad50	38.19303342	1.971816895	0.285521842	6.906010684	4.98E-12	1.72E-10
FBgn0085436	Not1	754.5863666	1.776002283	0.25728152	6.902953166	5.09E-12	1.75E-10
FBgn0037137	Nopp140	90.25156462	1.490857666	0.216169018	6.896722203	5.32E-12	1.82E-10
FBgn0003261	Rm62	539.6137517	0.7307401	0.106162014	6.883253958	5.85E-12	1.99E-10
FBgn0037358	elm	873.6045207	-1.087939027	0.158159885	-6.878729248	6.04E-12	2.05E-10
FBgn0051098	CG31098	370.553639	-0.825368122	0.12013541	-6.870315124	6.41E-12	2.17E-10
FBgn0003462	Sod	2640.131247	-1.390429161	0.202916279	-6.852230728	7.27E-12	2.45E-10
FBgn0035476	CG12766	72.01667898	-1.396444126	0.204055017	-6.843468723	7.73E-12	2.59E-10
FBgn0010434	cora	104.3210123	1.315880156	0.192414067	6.83879396	7.99E-12	2.67E-10
FBgn0016691	ATPsynO	2292.674842	-0.925566646	0.135593638	-6.826032989	8.73E-12	2.91E-10
FBgn0030850	stas	141.7581742	-0.831606326	0.121840524	-6.825367271	8.77E-12	2.91E-10
FBgn0283472	S6k	550.5144837	0.823669832	0.120710538	6.823512255	8.88E-12	2.94E-10
FBgn0003862	trx	136.031419	1.57942645	0.231528901	6.821724829	9.00E-12	2.96E-10
FBgn0053774	CG33774	310.0626771	-1.421680989	0.208431065	-6.820868998	9.05E-12	2.97E-10
FBgn0011296	l(2)efl	562.8409866	-1.098712033	0.161156058	-6.817689913	9.25E-12	3.02E-10
FBgn0027603	Ulp1	51.25923611	1.47723239	0.21668701	6.817355561	9.27E-12	3.02E-10
FBgn0000283	Cp190	81.73410697	1.66840224	0.244858868	6.813730116	9.51E-12	3.09E-10
FBgn0261641	CG42724	77.15192199	1.161303795	0.170645001	6.805378341	1.01E-11	3.26E-10
FBgn0083167	Neb-cGP	1929.908181	-0.957826644	0.140796029	-6.802937922	1.03E-11	3.30E-10
FBgn0026753	Vha13	4540.166832	-0.623169876	0.091617546	-6.801861721	1.03E-11	3.32E-10
FBgn0001125	Got2	376.2302048	-1.130900575	0.166334101	-6.798970084	1.05E-11	3.37E-10
FBgn0035617	l(3)psg2	45.89608258	1.685455593	0.248306476	6.787803602	1.14E-11	3.63E-10
FBgn0001404	egh	465.4496532	0.920848288	0.135907721	6.775540626	1.24E-11	3.93E-10
FBgn0033661	CG13185	53.57642435	1.748010988	0.257993569	6.775405275	1.24E-11	3.93E-10
FBgn0039882	CG11576	210.8821817	-0.986115321	0.145626749	-6.771526039	1.27E-11	4.02E-10
FBgn0033381	GstE13	34.18693548	-1.528583195	0.225879683	-6.767245161	1.31E-11	4.11E-10
FBgn0260008	UQCR-11	1023.601505	-1.002429055	0.14812244	-6.767570498	1.31E-11	4.11E-10
FBgn0036551	CG17029	254.67729	-1.290929458	0.190823439	-6.765046617	1.33E-11	4.16E-10
FBgn0029118	Sucb	288.7668556	-0.876449898	0.129584151	-6.763557796	1.35E-11	4.19E-10
FBgn0005617	msl-1	36.26102463	1.562258996	0.231157341	6.7584226	1.40E-11	4.32E-10
FBgn0086706	pix	572.0667543	0.578324862	0.085771719	6.742605468	1.56E-11	4.80E-10
FBgn0002569	Mal-A2	739.9244846	-1.233428982	0.183019636	-6.739325959	1.59E-11	4.90E-10
FBgn0034570	CG10543	57.85852696	1.239856764	0.184032052	6.73717838	1.61E-11	4.95E-10
FBgn0014163	fax	145.2064277	1.221201298	0.181344088	6.734166598	1.65E-11	5.04E-10
FBgn0039562	Gp93	562.8217812	-0.984890694	0.146308021	-6.731624747	1.68E-11	5.11E-10
FBgn0036059	nudE	171.7679111	1.76158625	0.261799409	6.728763279	1.71E-11	5.19E-10
FBgn0034400	CG15099	132.605327	1.793661426	0.266797045	6.722943377	1.78E-11	5.39E-10
FBgn0052446	Atox1	281.2030967	-0.794363756	0.118243961	-6.718006979	1.84E-11	5.55E-10
FBgn0031000	Muc18B	14.00233239	3.280643414	0.489580912	6.700921823	2.07E-11	6.20E-10
FBgn0265523	Smr	734.3198956	0.665085892	0.099253444	6.700884799	2.07E-11	6.20E-10
FBgn0011227	ox	1830.648805	-0.941011097	0.14048321	-6.698388368	2.11E-11	6.29E-10
FBgn0041581	AttB	17.14005264	4.019266255	0.600658854	6.691429295	2.21E-11	6.57E-10
FBgn0013749	Arf102F	990.3237288	-0.97893043	0.14651472	-6.681447656	2.37E-11	7.01E-10
FBgn0052483	CG32483	790.5913411	-0.767344237	0.114921626	-6.677109112	2.44E-11	7.20E-10
FBgn0033906	CG8331	1238.685209	-0.598938833	0.089721167	-6.675557766	2.46E-11	7.25E-10
FBgn0262732	mbf1	349.4074877	-0.786440669	0.117826612	-6.674558975	2.48E-11	7.28E-10
FBgn0034294	Muc55B	50.84826175	1.424833174	0.213826644	6.663496858	2.67E-11	7.82E-10
FBgn0032394	CG6746	534.3322733	-0.736935747	0.110727411	-6.655404821	2.83E-11	8.23E-10
FBgn0035779	CG8562	1903.574272	-0.717610084	0.108023715	-6.643079121	3.07E-11	8.90E-10
FBgn0037819	CG14688	123.3223216	-1.468701967	0.221079767	-6.643312453	3.07E-11	8.90E-10
FBgn0261552	ps	1613.020791	1.264491627	0.190496361	6.637878126	3.18E-11	9.19E-10
FBgn0051463	CG31463	238.1078864	-1.315661155	0.198263269	-6.6359299	3.22E-11	9.28E-10
FBgn0263599	l(3)72Ab	40.041309	1.412355904	0.213504621	6.61510696	3.71E-11	1.06E-09
FBgn0036857	CG9629	56.44030582	-1.412327661	0.213679814	-6.609551157	3.85E-11	1.10E-09
FBgn0040931	CG9034	801.0718622	-1.321363466	0.200068711	-6.60454831	3.99E-11	1.14E-09
FBgn0000339	cni	465.5401958	-1.200364446	0.18180359	-6.602534356	4.04E-11	1.15E-09
FBgn0020306	dom	104.4347655	1.114647863	0.169040913	6.593953167	4.28E-11	1.21E-09
FBgn0051148	Gba1a	1443.10639	-1.865888133	0.284361605	-6.561673947	5.32E-11	1.50E-09
FBgn0035484	CG11594	141.8561481	-1.217817245	0.185625951	-6.560598022	5.36E-11	1.51E-09
FBgn0034406	Jheh3	866.7738778	-0.736315058	0.112362032	-6.553059287	5.64E-11	1.58E-09
FBgn0265052	St3	188.2385309	-0.88937545	0.135776379	-6.550295827	5.74E-11	1.61E-09
FBgn0038302	CG4210	241.8769114	-1.083467491	0.165537358	-6.545153956	5.94E-11	1.66E-09
FBgn0038038	CG5167	958.9311644	-1.129057962	0.172621759	-6.540646836	6.13E-11	1.70E-09
FBgn0035438	PHGPx	1208.671556	-1.001835963	0.153205106	-6.539181284	6.19E-11	1.71E-09
FBgn0035975	PGRP-LA	123.4415731	0.981122132	0.150028921	6.539553329	6.17E-11	1.71E-09
FBgn0085322	CG34293	68.76421065	-0.979036976	0.149824679	-6.534550786	6.38E-11	1.76E-09
FBgn0037070	CG11309	751.731291	-0.699373092	0.107079953	-6.531316779	6.52E-11	1.79E-09
FBgn0034282	Mapmodulin	152.3438358	1.010783723	0.155000837	6.521150107	6.98E-11	1.91E-09
FBgn0029795	CG15773	144.5468813	-1.374857798	0.211228227	-6.508873445	7.57E-11	2.06E-09
FBgn0086758	chinmo	20.06015368	1.915620867	0.294431342	6.506171699	7.71E-11	2.10E-09
FBgn0037936	CG6908	1164.830598	-2.882400624	0.443978982	-6.492200631	8.46E-11	2.29E-09
FBgn0054026	CG34026	3953.737807	-1.703089199	0.262579772	-6.485987795	8.82E-11	2.38E-09
FBgn0023477	Taldo	1477.987568	-1.800457928	0.277876627	-6.479342831	9.21E-11	2.48E-09
FBgn0032088	CG13102	2221.353726	-0.824519458	0.127260233	-6.479003208	9.23E-11	2.48E-09
FBgn0033741	CG8545	170.9822027	0.893000952	0.137921345	6.474711745	9.50E-11	2.54E-09
FBgn0034753	CG2852	956.2672465	-0.76823436	0.118665553	-6.473945803	9.55E-11	2.55E-09
FBgn0037996	CG4830	188.1958577	-1.360255719	0.210552667	-6.460406038	1.04E-10	2.78E-09
FBgn0002022	Catsup	444.940606	-0.687088768	0.106363591	-6.459811696	1.05E-10	2.78E-09
FBgn0034275	CG5002	90.79118514	-1.319572386	0.204414185	-6.455385598	1.08E-10	2.86E-09
FBgn0032884	Pomp	230.5128739	-0.887388028	0.137502429	-6.453617091	1.09E-10	2.88E-09
FBgn0037312	CG11999	124.7761667	-1.199551446	0.185947362	-6.451026973	1.11E-10	2.92E-09
FBgn0036749	CG7460	25.92698618	-2.319014874	0.359583401	-6.449171084	1.12E-10	2.94E-09
FBgn0267828	Fatp	600.7030684	-0.769236117	0.119278708	-6.449064805	1.13E-10	2.94E-09
FBgn0051004	mesh	817.2223309	0.770151573	0.11949168	6.445231752	1.15E-10	3.01E-09
FBgn0028948	CG15253	42.98471562	-1.359962414	0.21106801	-6.443242699	1.17E-10	3.04E-09
FBgn0058191	CG40191	308.3855025	-0.747541366	0.116065209	-6.440701512	1.19E-10	3.08E-09
FBgn0035397	CG11486	517.567538	1.287447168	0.199996452	6.43735004	1.22E-10	3.14E-09
FBgn0037019	Pex16	378.9160883	-1.016382928	0.158016479	-6.432132492	1.26E-10	3.24E-09
FBgn0038878	CG3301	185.6327531	-1.128269628	0.175888748	-6.414677691	1.41E-10	3.62E-09
FBgn0037203	slif	490.5981887	-1.050192861	0.163837007	-6.409985641	1.46E-10	3.73E-09
FBgn0037875	ZnT86D	207.4127926	-0.791977891	0.123576935	-6.408784051	1.47E-10	3.75E-09
FBgn0001092	Gapdh2	2049.437996	-0.722687161	0.112880643	-6.402224001	1.53E-10	3.90E-09
FBgn0263748	CG43673	1435.306106	-1.244832569	0.194935651	-6.385864069	1.70E-10	4.33E-09
FBgn0036996	mag	3016.726345	-1.349273036	0.2115591	-6.37775938	1.80E-10	4.55E-09
FBgn0085412	CG34383	38.87335653	1.786342846	0.280362107	6.371555926	1.87E-10	4.72E-09
FBgn0027785	NP15.6	746.4197876	-0.759251714	0.119189218	-6.370137535	1.89E-10	4.75E-09
FBgn0261617	nej	306.9690713	0.961666193	0.150985064	6.369280276	1.90E-10	4.77E-09
FBgn0265991	Zasp52	142.9959244	1.618512537	0.254155847	6.368189275	1.91E-10	4.79E-09
FBgn0034709	Swim	429.2789769	1.255000246	0.197126348	6.366476412	1.93E-10	4.83E-09
FBgn0039681	CG7582	19.10785659	-2.249115361	0.353376372	-6.364645579	1.96E-10	4.87E-09
FBgn0030305	CG1749	132.0599639	-0.798271544	0.125453943	-6.363064582	1.98E-10	4.91E-09
FBgn0030775	CG9673	4871.81881	-0.579444461	0.091161851	-6.356216526	2.07E-10	5.12E-09
FBgn0026872	CG14777	174.310143	-1.027813144	0.161738604	-6.354779371	2.09E-10	5.15E-09
FBgn0015240	Hr96	263.4457618	-1.240151911	0.195209078	-6.352941801	2.11E-10	5.20E-09
FBgn0051712	CG31712	93.19052033	0.977802568	0.154099411	6.345271297	2.22E-10	5.45E-09
FBgn0039291	CG13663	122.1410221	-0.972811958	0.153328232	-6.344636902	2.23E-10	5.46E-09
FBgn0015589	Apc	24.52928074	1.874759434	0.29571342	6.339784764	2.30E-10	5.60E-09
FBgn0031554	CG15418	65.69219904	-1.476406813	0.23287617	-6.339879314	2.30E-10	5.60E-09
FBgn0032051	CG13097	141.3701218	1.062436616	0.167645895	6.337385219	2.34E-10	5.67E-09
FBgn0026573	ADD1	63.26002965	1.329681327	0.210513299	6.316376832	2.68E-10	6.47E-09
FBgn0033443	CG1698	246.6476379	0.995405859	0.157589008	6.316467573	2.68E-10	6.47E-09
FBgn0026533	Dek	96.64043674	1.215207512	0.19268217	6.306797946	2.85E-10	6.86E-09
FBgn0053533	lectin-37Db	1450.44385	-1.354781944	0.215007426	-6.301093724	2.96E-10	7.10E-09
FBgn0033093	CG3270	155.8678705	-1.088446652	0.172912477	-6.294783755	3.08E-10	7.37E-09
FBgn0086129	snama	71.7656864	0.96291081	0.153027303	6.292411801	3.13E-10	7.47E-09
FBgn0261836	Msp300	1150.481818	1.323437536	0.210486738	6.287510302	3.23E-10	7.68E-09
FBgn0013733	shot	371.9240844	1.337070703	0.212801635	6.283178727	3.32E-10	7.88E-09
FBgn0033196	CG1358	77.14095825	-0.99896041	0.159157436	-6.276555046	3.46E-10	8.20E-09
FBgn0038147	CCHa2	547.9164149	-1.394095482	0.222174287	-6.274783206	3.50E-10	8.27E-09
FBgn0033434	CG1902	374.260452	-0.609741027	0.09721791	-6.271900183	3.57E-10	8.41E-09
FBgn0262739	AGO1	938.1872982	0.789334112	0.125899368	6.269563743	3.62E-10	8.51E-09
FBgn0030817	CG4991	37.49058693	-1.579164558	0.251923058	-6.268439946	3.65E-10	8.55E-09
FBgn0037548	CG7900	57.74826272	-1.24756861	0.19935276	-6.258095511	3.90E-10	9.11E-09
FBgn0036746	Crtc	95.96356927	1.446340257	0.231332765	6.252206686	4.05E-10	9.44E-09
FBgn0013272	Gp150	2081.064041	1.371375238	0.219559645	6.24602595	4.21E-10	9.78E-09
FBgn0039537	CG5590	1572.187376	-0.665787525	0.106597201	-6.245825558	4.22E-10	9.78E-09
FBgn0000079	Amy-p	29638.84629	-1.913993289	0.306500357	-6.244669045	4.25E-10	9.83E-09
FBgn0038826	Syp	651.6590568	0.982973706	0.157424109	6.244111595	4.26E-10	9.84E-09
FBgn0035032	ATPsynF	2987.438283	-1.145855937	0.183678505	-6.23837795	4.42E-10	1.02E-08
FBgn0035298	SCOT	232.1359014	-1.59239307	0.255597619	-6.230077872	4.66E-10	1.07E-08
FBgn0039094	CG10184	133.7088962	-1.628104682	0.261324388	-6.230205655	4.66E-10	1.07E-08
FBgn0034240	MESR4	42.57862255	1.812174683	0.291048622	6.226364073	4.77E-10	1.09E-08
FBgn0031813	CG9527	1150.409786	-0.900393083	0.144664192	-6.224021803	4.85E-10	1.10E-08
FBgn0062412	Ctr1B	177.4131288	-1.774477833	0.285301888	-6.219649817	4.98E-10	1.13E-08
FBgn0283494	Adk2	581.6173849	-0.764312931	0.122879161	-6.220037008	4.97E-10	1.13E-08
FBgn0037718	P58IPK	148.909369	-1.189478285	0.191300704	-6.217845827	5.04E-10	1.14E-08
FBgn0015229	glec	26.6428044	1.735235161	0.279183182	6.215400043	5.12E-10	1.15E-08
FBgn0033379	Mys45A	84.06470369	1.204013328	0.193724219	6.215089346	5.13E-10	1.15E-08
FBgn0053337	CG33337	27.68597995	-2.207784631	0.355425984	-6.21165793	5.24E-10	1.18E-08
FBgn0038100	Paip2	122.9851072	1.52882114	0.246196844	6.209751182	5.31E-10	1.19E-08
FBgn0039936	Gyf	147.2823	1.168195839	0.188324959	6.20308557	5.54E-10	1.24E-08
FBgn0010612	ATPsynG	2523.556422	-0.938658558	0.151393846	-6.20011041	5.64E-10	1.26E-08
FBgn0031820	Daxx	25.68909577	1.905418098	0.307990018	6.18662289	6.15E-10	1.37E-08
FBgn0037174	CG14457	93.48203026	1.207886091	0.195484341	6.178940391	6.45E-10	1.43E-08
FBgn0050272	MFS1	156.9994791	-1.254335453	0.203004856	-6.17884458	6.46E-10	1.43E-08
FBgn0040271	Sulf1	24.76089287	1.589701978	0.257659279	6.169783539	6.84E-10	1.51E-08
FBgn0031320	CG5126	163.8922602	-1.415934751	0.229551697	-6.168260875	6.90E-10	1.52E-08
FBgn0035517	CG1265	341.018352	-0.872786986	0.14168455	-6.160071691	7.27E-10	1.59E-08
FBgn0050011	gem	315.7848329	1.528857906	0.248178129	6.160324898	7.26E-10	1.59E-08
FBgn0087035	AGO2	194.5894272	1.048472374	0.170199704	6.160247917	7.26E-10	1.59E-08
FBgn0039156	CG6178	708.1400236	-0.892375904	0.144961859	-6.155935841	7.46E-10	1.62E-08
FBgn0039341	CG5112	313.3424242	-0.602524604	0.098033607	-6.14610259	7.94E-10	1.72E-08
FBgn0262743	Fs(2)Ket	114.1487724	1.492230989	0.242836783	6.144995717	8.00E-10	1.73E-08
FBgn0035583	CG13704	738.1775496	0.960836548	0.156427897	6.142360576	8.13E-10	1.76E-08
FBgn0000659	fkh	141.1239616	1.165402613	0.189927539	6.136038076	8.46E-10	1.82E-08
FBgn0029823	CG3011	120.3568259	-0.811958259	0.132336923	-6.135538286	8.49E-10	1.83E-08
FBgn0011576	Cyp4d2	61.88880524	-1.147192677	0.186998891	-6.13475659	8.53E-10	1.83E-08
FBgn0051901	Mur29B	869.5585546	1.718199891	0.280077285	6.134734894	8.53E-10	1.83E-08
FBgn0034538	CG16799	181.8062308	-0.874916576	0.142667532	-6.132555609	8.65E-10	1.85E-08
FBgn0030503	Tango2	71.75903971	-1.354253832	0.221038662	-6.126773576	8.97E-10	1.91E-08
FBgn0010516	wal	1776.879043	-0.918203235	0.149895637	-6.125616826	9.03E-10	1.92E-08
FBgn0036501	CG7272	110.0980783	-1.160035497	0.1893913	-6.125072796	9.06E-10	1.92E-08
FBgn0010575	sbb	285.5893028	0.875825658	0.143090308	6.120789532	9.31E-10	1.96E-08
FBgn0052230	ND-MLRQ	2325.11133	-1.151484924	0.18811606	-6.121140962	9.29E-10	1.96E-08
FBgn0051810	CG31810	67.8487574	-1.746318903	0.285543377	-6.115774504	9.61E-10	2.02E-08
FBgn0030776	CG4653	4393.471669	-1.305166292	0.213609673	-6.110052385	9.96E-10	2.09E-08
FBgn0050394	CG30394	46.54760435	1.29548401	0.212057013	6.109130723	1.00E-09	2.10E-08
FBgn0039349	Ssadh	492.5164241	-1.471621474	0.241101588	-6.103740269	1.04E-09	2.17E-08
FBgn0035620	CG5150	2316.02983	-1.345524784	0.220483639	-6.102606017	1.04E-09	2.18E-08
FBgn0003391	shg	192.8591121	0.935823521	0.153443139	6.098829337	1.07E-09	2.22E-08
FBgn0000581	E(Pc)	72.92044854	1.173969446	0.192518474	6.097957356	1.07E-09	2.23E-08
FBgn0260442	rhea	140.7335832	1.031293486	0.169302427	6.091427652	1.12E-09	2.32E-08
FBgn0034734	CG4554	55.00675773	1.865499067	0.30718217	6.072940574	1.26E-09	2.59E-08
FBgn0266848	wap	72.70787836	1.210648758	0.199343298	6.073185146	1.25E-09	2.59E-08
FBgn0002526	LanA	49.15169963	1.359133359	0.224164052	6.063119166	1.34E-09	2.74E-08
FBgn0032779	CG16771	195.0035742	-0.982497344	0.162087406	-6.061527958	1.35E-09	2.77E-08
FBgn0259685	crb	136.9193084	1.600820019	0.264171702	6.059771011	1.36E-09	2.79E-08
FBgn0024248	chico	15.6571306	2.232490169	0.368701898	6.055000482	1.40E-09	2.87E-08
FBgn0033683	CG18343	172.3088491	-0.85979346	0.14209227	-6.050951691	1.44E-09	2.93E-08
FBgn0004656	fs(1)h	483.2337014	0.828800111	0.137148302	6.043094211	1.51E-09	3.07E-08
FBgn0266410	CG45050	1347.522381	1.182644447	0.195704254	6.043018597	1.51E-09	3.07E-08
FBgn0030610	CG9065	81.9144711	-1.150870228	0.190477073	-6.042040701	1.52E-09	3.08E-08
FBgn0003118	pnt	54.38830158	1.234862312	0.204421855	6.040754865	1.53E-09	3.10E-08
FBgn0027066	Eb1	138.714088	1.102420854	0.182507126	6.040426342	1.54E-09	3.10E-08
FBgn0050489	Cyp12d1-p	85.0427968	-1.498678634	0.248553668	-6.02959773	1.64E-09	3.30E-08
FBgn0033128	Tsp42Eg	90.65252482	-0.953150183	0.158103632	-6.028641933	1.65E-09	3.31E-08
FBgn0029994	CG2254	1441.473702	-1.400759456	0.232380063	-6.027881377	1.66E-09	3.32E-08
FBgn0030481	CG1662	69.66294618	-1.014881141	0.168430802	-6.025507979	1.69E-09	3.36E-08
FBgn0038037	Cyp9f2	1416.403501	-0.874434741	0.145160752	-6.023906114	1.70E-09	3.39E-08
FBgn0261793	Trf2	425.00075	1.227143469	0.203811448	6.02097421	1.73E-09	3.44E-08
FBgn0262801	twr	983.350819	-0.809126214	0.134460453	-6.01757764	1.77E-09	3.51E-08
FBgn0000541	E(bx)	80.74540615	1.334582613	0.221882061	6.014828822	1.80E-09	3.56E-08
FBgn0262782	Mdh1	1623.763626	-1.066214084	0.177376688	-6.011015847	1.84E-09	3.64E-08
FBgn0032050	CG13096	130.8167604	0.992658734	0.165419217	6.000867093	1.96E-09	3.86E-08
FBgn0001124	Got1	225.5117626	-0.948656221	0.158102734	-6.000251854	1.97E-09	3.87E-08
FBgn0036309	Hip1	84.21537213	1.473510034	0.245626188	5.998994022	1.99E-09	3.89E-08
FBgn0033423	CG1809	3790.544858	-1.27388941	0.212796478	-5.986421496	2.15E-09	4.19E-08
FBgn0063667	CG32335	37.95695884	-1.628625418	0.272058261	-5.986311217	2.15E-09	4.19E-08
FBgn0004889	tws	68.41250583	1.034037802	0.172834665	5.982814873	2.19E-09	4.27E-08
FBgn0031216	Zir	30.52600176	1.622020431	0.271154257	5.981910252	2.21E-09	4.28E-08
FBgn0035049	Mmp1	127.0526602	0.87044823	0.145513692	5.981899127	2.21E-09	4.28E-08
FBgn0019928	Ser8	1371.080686	-1.915903196	0.320643189	-5.975187573	2.30E-09	4.44E-08
FBgn0034497	CG9090	33.30938729	-1.485703626	0.248631907	-5.97551475	2.29E-09	4.44E-08
FBgn0033504	CAP	257.0975079	1.143044776	0.191397436	5.972100765	2.34E-09	4.51E-08
FBgn0027496	epsilonCOP	258.6542544	-1.240449735	0.207765385	-5.970435026	2.37E-09	4.55E-08
FBgn0034278	CG14488	26.99777413	1.557474767	0.260966356	5.96810559	2.40E-09	4.60E-08
FBgn0037974	CG12224	34.14081173	-1.852223322	0.310358916	-5.968004231	2.40E-09	4.60E-08
FBgn0013756	Mtor	60.93491667	1.489215661	0.249640729	5.965435479	2.44E-09	4.65E-08
FBgn0030837	CG8661	2693.130895	-0.969492226	0.162516882	-5.965486276	2.44E-09	4.65E-08
FBgn0263346	CG43427	327.0233121	1.167388882	0.195722954	5.964496548	2.45E-09	4.67E-08
FBgn0000635	Fas2	192.0648032	1.101873335	0.184812573	5.962112394	2.49E-09	4.72E-08
FBgn0032780	CG13085	63.37986249	-1.219072554	0.204516748	-5.960746808	2.51E-09	4.75E-08
FBgn0001235	hth	163.6151776	1.382645393	0.232039621	5.958660788	2.54E-09	4.79E-08
FBgn0034279	CG18635	55.39286123	1.423634749	0.238912531	5.958811545	2.54E-09	4.79E-08
FBgn0031118	RhoGAP19D	301.2275621	1.073414545	0.180287776	5.953895319	2.62E-09	4.93E-08
FBgn0001565	Hlc	196.0451264	0.685827152	0.115214577	5.952607493	2.64E-09	4.95E-08
FBgn0026061	Mipp1	678.0483985	-0.637843971	0.1073553	-5.941429748	2.83E-09	5.29E-08
FBgn0054010	CG34010	17.05948783	-1.674561543	0.282274328	-5.932390497	2.99E-09	5.58E-08
FBgn0263234	Phae1	2218.40862	-1.330320063	0.224321622	-5.930413893	3.02E-09	5.64E-08
FBgn0028968	gammaCOP	253.6452847	-0.915321939	0.154455955	-5.926103253	3.10E-09	5.77E-08
FBgn0052115	CG32115	167.1830097	-0.929114534	0.156886131	-5.922222226	3.18E-09	5.90E-08
FBgn0000568	Eip75B	211.3984427	0.930218508	0.157086183	5.921708014	3.19E-09	5.91E-08
FBgn0028473	Non1	1464.250829	0.69947606	0.118274862	5.91398756	3.34E-09	6.18E-08
FBgn0032208	CG5604	106.3429502	1.18042484	0.19981103	5.907706109	3.47E-09	6.40E-08
FBgn0030521	CtsB1	4041.774349	-0.791396678	0.133978135	-5.906909188	3.49E-09	6.42E-08
FBgn0039697	CG7834	1637.95701	-1.176855458	0.199269926	-5.905835765	3.51E-09	6.44E-08
FBgn0265185	CG44250	2134.042004	-0.951413085	0.161089956	-5.90609811	3.50E-09	6.44E-08
FBgn0003159	CG2841	110.8622723	1.154562911	0.195618274	5.902121956	3.59E-09	6.57E-08
FBgn0052423	shep	965.706642	1.00026577	0.169610584	5.897425429	3.69E-09	6.73E-08
FBgn0053138	AGBE	56.54432226	-1.156930221	0.196170684	-5.897569391	3.69E-09	6.73E-08
FBgn0036300	CG10688	337.7501974	-0.944911648	0.160392163	-5.891258236	3.83E-09	6.97E-08
FBgn0033635	CG7777	144.8002912	-1.07994462	0.183332037	-5.890648678	3.85E-09	6.98E-08
FBgn0034528	CG11180	87.83252684	1.995900711	0.339153249	5.88495236	3.98E-09	7.22E-08
FBgn0028743	Dhit	103.1783355	1.101701328	0.187249118	5.883612911	4.01E-09	7.26E-08
FBgn0033636	tou	108.8995989	1.098370048	0.1866986	5.883118835	4.03E-09	7.27E-08
FBgn0003165	pum	358.6197401	1.485645701	0.252662688	5.879956835	4.10E-09	7.39E-08
FBgn0014018	Rel	174.2376418	1.295908608	0.220415238	5.879396623	4.12E-09	7.39E-08
FBgn0263200	Galt	375.541324	-0.80084669	0.136211942	-5.879416128	4.12E-09	7.39E-08
FBgn0013772	Cyp6a8	183.2130023	-3.944351164	0.671000403	-5.878314154	4.14E-09	7.42E-08
FBgn0040308	Jafrac2	102.0936468	-1.076198462	0.183090797	-5.877949526	4.15E-09	7.42E-08
FBgn0032643	GCS2beta	185.9649606	-0.748316308	0.127375537	-5.874882479	4.23E-09	7.53E-08
FBgn0037678	CG16749	11234.77598	-1.081475303	0.184079221	-5.875053673	4.23E-09	7.53E-08
FBgn0014869	Pglym78	495.3390296	-0.750542369	0.12784269	-5.870827428	4.34E-09	7.70E-08
FBgn0013674	mt:CoI	23228.04656	-0.98027227	0.167167866	-5.863999412	4.52E-09	8.01E-08
FBgn0001128	Gpdh	934.9692945	-0.610461248	0.104162052	-5.860687584	4.61E-09	8.15E-08
FBgn0037714	CG9396	283.399717	-1.659143688	0.283128934	-5.86002873	4.63E-09	8.17E-08
FBgn0035663	CG6462	49.75251673	-1.55158589	0.264862114	-5.858089197	4.68E-09	8.25E-08
FBgn0086378	Alg-2	474.9985131	-0.812477002	0.138711531	-5.857314062	4.70E-09	8.27E-08
FBgn0029969	CG10932	439.5615881	-1.132175997	0.193348674	-5.855618109	4.75E-09	8.34E-08
FBgn0037782	Npc2d	616.0012655	-1.318120998	0.225150345	-5.854403626	4.79E-09	8.38E-08
FBgn0003360	sesB	6236.640758	-0.722558886	0.123531622	-5.849181568	4.94E-09	8.63E-08
FBgn0243512	puc	310.3247118	1.166020498	0.199463261	5.845790816	5.04E-09	8.79E-08
FBgn0266717	Bruce	236.7247385	1.562575686	0.267455843	5.842368842	5.15E-09	8.96E-08
FBgn0032889	CG9331	894.5314292	-0.71724375	0.122804039	-5.840555048	5.20E-09	9.04E-08
FBgn0032131	CG3841	487.155733	-0.918625592	0.157435627	-5.834928266	5.38E-09	9.33E-08
FBgn0035016	CG4612	37.32355462	1.194413515	0.204746264	5.833627872	5.42E-09	9.39E-08
FBgn0085330	CG34301	894.2533409	-0.980684087	0.168142849	-5.832445998	5.46E-09	9.43E-08
FBgn0266742	CR45215	40.51344903	-1.561220305	0.267689685	-5.832201964	5.47E-09	9.43E-08
FBgn0036847	CG11577	28.40982495	-1.277360528	0.219060515	-5.831085201	5.51E-09	9.47E-08
FBgn0000251	cad	138.2102661	0.957116181	0.164410161	5.821514761	5.83E-09	1.00E-07
FBgn0031670	CG3887	191.6347316	-0.95103539	0.163404899	-5.820115532	5.88E-09	1.01E-07
FBgn0262730	CG14446	88.19512268	1.07923419	0.185540989	5.816688784	6.00E-09	1.03E-07
FBgn0052687	CG32687	374.0824133	-0.775589965	0.133409612	-5.813598826	6.11E-09	1.04E-07
FBgn0027499	wde	55.07489837	1.623254099	0.27949157	5.807882149	6.33E-09	1.08E-07
FBgn0039321	CG10550	458.7070573	-1.495031328	0.257493333	-5.806097227	6.39E-09	1.09E-07
FBgn0041094	scyl	668.8056048	0.87824827	0.151270027	5.805831386	6.40E-09	1.09E-07
FBgn0033428	Updo	562.9558147	-1.296174423	0.223289374	-5.804908667	6.44E-09	1.09E-07
FBgn0030451	CG15717	170.5269937	-0.871710969	0.150228161	-5.802580304	6.53E-09	1.10E-07
FBgn0037016	CG13252	151.5553911	0.788617011	0.135941602	5.801145506	6.59E-09	1.11E-07
FBgn0039633	CG11873	26.7192897	1.522564002	0.262518326	5.799838901	6.64E-09	1.12E-07
FBgn0039474	CG6283	977.8483608	-1.18592849	0.204498733	-5.799197245	6.66E-09	1.12E-07
FBgn0028694	Rpn11	235.637248	-0.71000668	0.122503398	-5.79581212	6.80E-09	1.14E-07
FBgn0035101	p130CAS	52.02180011	1.156941406	0.199609877	5.796012828	6.79E-09	1.14E-07
FBgn0005694	Aef1	44.86490462	1.389417324	0.240085538	5.78717624	7.16E-09	1.20E-07
FBgn0039172	Spase22-23	209.5916757	-1.01471795	0.1754128	-5.784742917	7.26E-09	1.21E-07
FBgn0036667	CG9669	277.8561586	-0.845050892	0.146250349	-5.778111981	7.55E-09	1.26E-07
FBgn0040942	CG12643	124.7385682	-0.848493041	0.146948343	-5.774090556	7.74E-09	1.29E-07
FBgn0031695	Cyp4ac3	55.36289761	1.284637851	0.22257238	5.771775698	7.84E-09	1.30E-07
FBgn0032815	CG10462	76.87711719	1.944801094	0.337095244	5.769292586	7.96E-09	1.32E-07
FBgn0035601	Uev1A	413.1544993	-0.894094005	0.155207322	-5.760643191	8.38E-09	1.39E-07
FBgn0010488	NAT1	308.4910318	1.08875151	0.189282547	5.751991019	8.82E-09	1.46E-07
FBgn0043884	mask	223.0927816	1.572412195	0.27338625	5.751614041	8.84E-09	1.46E-07
FBgn0261258	rgn	125.5529785	1.652485288	0.287530581	5.747163597	9.08E-09	1.49E-07
FBgn0030653	CG7860	12.7805037	-2.785993608	0.484796414	-5.746728995	9.10E-09	1.49E-07
FBgn0038360	CG9590	126.3118864	-0.844178491	0.147001676	-5.742645332	9.32E-09	1.53E-07
FBgn0025726	unc-13	72.4438292	1.242130748	0.216438907	5.738943923	9.53E-09	1.56E-07
FBgn0260722	CR42549	23.53425891	1.542957297	0.268885859	5.7383356	9.56E-09	1.56E-07
FBgn0264493	rdx	131.6648595	0.817495716	0.142490485	5.737195109	9.63E-09	1.57E-07
FBgn0026427	Su(var)2-HP2	36.82350561	1.96839612	0.343408123	5.731943979	9.93E-09	1.61E-07
FBgn0034802	CG3800	1367.966151	0.924953481	0.161381958	5.731455319	9.96E-09	1.62E-07
FBgn0016977	spen	643.2394596	1.31042686	0.228897172	5.724958721	1.03E-08	1.68E-07
FBgn0024985	CG11448	37.57133619	1.169946792	0.204578253	5.718822873	1.07E-08	1.73E-07
FBgn0028646	aralar1	210.4737305	-0.657446186	0.114958666	-5.718978924	1.07E-08	1.73E-07
FBgn0024807	DIP1	175.3180132	1.368368893	0.239602495	5.710996009	1.12E-08	1.81E-07
FBgn0040064	yip2	734.6485688	-0.815237825	0.142925216	-5.703946758	1.17E-08	1.88E-07
FBgn0000578	ena	97.93688582	1.13775502	0.199501124	5.703000535	1.18E-08	1.89E-07
FBgn0029996	UbcE2H	414.0612697	0.794146503	0.139335158	5.699541404	1.20E-08	1.92E-07
FBgn0038924	CG6028	4297.343727	-1.45601563	0.255876583	-5.690304332	1.27E-08	2.03E-07
FBgn0039328	CHKov2	15.44503104	2.029937793	0.356782963	5.689559205	1.27E-08	2.03E-07
FBgn0037163	laza	147.3040281	0.942357921	0.165655624	5.688656367	1.28E-08	2.04E-07
FBgn0026206	mei-P26	175.0191111	0.807560873	0.141971043	5.688208374	1.28E-08	2.04E-07
FBgn0032787	CG10195	91.90511919	-0.995067481	0.1749688	-5.687113817	1.29E-08	2.05E-07
FBgn0034664	CG4377	4346.981762	-1.226882243	0.215822698	-5.68467661	1.31E-08	2.08E-07
FBgn0025455	CycT	164.825453	1.474508431	0.259799862	5.675555099	1.38E-08	2.19E-07
FBgn0028969	deltaCOP	479.8266394	-0.790696702	0.139326726	-5.675125823	1.39E-08	2.19E-07
FBgn0038353	CG5399	6923.85779	1.095476049	0.193030567	5.675142886	1.39E-08	2.19E-07
FBgn0029980	CG10778	190.8659449	-0.966178284	0.170401912	-5.669996733	1.43E-08	2.25E-07
FBgn0037906	PGRP-LB	564.6288846	-0.771586569	0.136236343	-5.663588355	1.48E-08	2.33E-07
FBgn0069242	eca	362.6735098	-0.941499293	0.166288997	-5.661825551	1.50E-08	2.35E-07
FBgn0016696	Pitslre	191.4593829	1.067804369	0.188735159	5.657686531	1.53E-08	2.40E-07
FBgn0010388	Dro	17.0646939	2.462473714	0.435664676	5.652222572	1.58E-08	2.48E-07
FBgn0035265	CG18173	411.1513903	-0.714000372	0.126417569	-5.647952079	1.62E-08	2.53E-07
FBgn0010803	TrpRS	125.6378117	-0.806044727	0.142724546	-5.647555022	1.63E-08	2.53E-07
FBgn0034245	UQCR-6.4	1761.203634	-0.894977193	0.158663808	-5.640714197	1.69E-08	2.63E-07
FBgn0039302	Nup358	78.6614153	1.130694343	0.200471724	5.640168692	1.70E-08	2.64E-07
FBgn0029709	CHOp24	885.1040389	-1.157457726	0.205293523	-5.638062562	1.72E-08	2.66E-07
FBgn0000043	Act42A	262.2774951	1.017511	0.180482478	5.637727345	1.72E-08	2.66E-07
FBgn0259101	CG42249	1726.124409	-0.770580449	0.136749328	-5.634985286	1.75E-08	2.70E-07
FBgn0030836	CG8664	23.20035964	-1.725743977	0.306290203	-5.634342719	1.76E-08	2.71E-07
FBgn0038968	CG12499	49.2937356	1.488444465	0.264293205	5.631792415	1.78E-08	2.74E-07
FBgn0040609	CG3348	198.7851115	-1.22424999	0.217462054	-5.629717781	1.81E-08	2.77E-07
FBgn0052407	CG32407	381.3716071	-1.025570453	0.182266652	-5.626758609	1.84E-08	2.82E-07
FBgn0261596	RpS24	6646.45456	0.76177846	0.135418655	5.625358337	1.85E-08	2.83E-07
FBgn0001989	ND-B17	793.473604	-0.912857273	0.162324328	-5.623662739	1.87E-08	2.86E-07
FBgn0051104	CG31104	513.9239608	-1.131462912	0.201319907	-5.620223705	1.91E-08	2.91E-07
FBgn0040773	COX7C	2341.129298	-0.792782901	0.141070394	-5.619768098	1.91E-08	2.91E-07
FBgn0012037	Ance	3255.094023	-0.563313401	0.100256142	-5.618742037	1.92E-08	2.92E-07
FBgn0010909	msn	158.8432147	0.845696535	0.15099331	5.600887445	2.13E-08	3.24E-07
FBgn0032449	CG17036	110.7565742	-1.202343195	0.21480783	-5.597296879	2.18E-08	3.30E-07
FBgn0044872	FucTC	136.3451386	-1.051809719	0.187924825	-5.596970596	2.18E-08	3.30E-07
FBgn0005386	ash1	18.00104456	2.218156906	0.396915285	5.588489505	2.29E-08	3.46E-07
FBgn0037715	CG9399	470.9770501	-0.97295809	0.174112722	-5.588093039	2.30E-08	3.46E-07
FBgn0050410	Rpi	652.0998939	-1.050619826	0.188038564	-5.587257215	2.31E-08	3.47E-07
FBgn0030605	ND-B18	390.3660959	-0.803478365	0.143929025	-5.582462377	2.37E-08	3.56E-07
FBgn0263445	CR43468	34.56014258	-1.161499621	0.208101218	-5.581416751	2.39E-08	3.58E-07
FBgn0022029	l(2)k01209	62.89846711	0.981225083	0.175881326	5.578904267	2.42E-08	3.62E-07
FBgn0013675	mt:CoII	46644.86301	-1.342469357	0.240879003	-5.573210371	2.50E-08	3.74E-07
FBgn0039470	CG6296	208.4427511	-1.527846454	0.274225447	-5.571497722	2.53E-08	3.77E-07
FBgn0034480	CG16898	47.62731276	1.320130634	0.237149132	5.566668626	2.60E-08	3.87E-07
FBgn0011742	Arp2	230.1306088	0.781904712	0.140547185	5.563289723	2.65E-08	3.94E-07
FBgn0040765	luna	123.0586101	1.000488152	0.179892311	5.561594863	2.67E-08	3.97E-07
FBgn0035046	ND-19	332.3898527	-0.932895695	0.167883754	-5.556795539	2.75E-08	4.06E-07
FBgn0261014	TER94	411.2462873	-0.572874938	0.103091719	-5.556944277	2.75E-08	4.06E-07
FBgn0004167	kst	409.7644381	1.395104957	0.251295171	5.551658434	2.83E-08	4.18E-07
FBgn0061200	Nup153	88.39555348	1.305170544	0.235201819	5.549151571	2.87E-08	4.23E-07
FBgn0033981	Cyp6a21	316.7464289	-1.628181667	0.29375793	-5.542596474	2.98E-08	4.38E-07
FBgn0035023	ITP	40.80276995	1.294087348	0.233482854	5.542536956	2.98E-08	4.38E-07
FBgn0031684	ND-13A	402.2158443	-0.988309308	0.178326154	-5.542144452	2.99E-08	4.38E-07
FBgn0250814	UQCR-C2	1523.08046	-0.887299675	0.160280649	-5.535912655	3.10E-08	4.53E-07
FBgn0031228	ND-15	1058.342067	-1.007902001	0.182263305	-5.529922785	3.20E-08	4.68E-07
FBgn0032029	CG17292	161.3011013	-0.767407703	0.138820842	-5.528043863	3.24E-08	4.73E-07
FBgn0053127	CG33127	4158.855529	-1.068859604	0.193382749	-5.527171435	3.25E-08	4.74E-07
FBgn0041188	Atx2	186.9681022	1.02994325	0.18637871	5.526077787	3.27E-08	4.76E-07
FBgn0050495	CG30495	169.3240059	-1.387974156	0.251304342	-5.523080671	3.33E-08	4.84E-07
FBgn0002431	hyd	24.85084782	1.370071909	0.248090451	5.522469333	3.34E-08	4.85E-07
FBgn0015038	Cyp9b1	71.81172953	1.096192095	0.198526884	5.521630488	3.36E-08	4.86E-07
FBgn0027948	msps	29.03423532	1.635674561	0.296234496	5.521553307	3.36E-08	4.86E-07
FBgn0034295	CG10911	8105.844164	1.06307761	0.192581428	5.520146065	3.39E-08	4.89E-07
FBgn0003863	alphaTry	279481.4939	-0.987608252	0.179026169	-5.516558044	3.46E-08	4.98E-07
FBgn0038460	CG18622	194.5020581	-0.892200567	0.161767221	-5.515335929	3.48E-08	5.01E-07
FBgn0004698	Xpc	47.5324995	1.243698381	0.225750459	5.509173211	3.61E-08	5.18E-07
FBgn0034723	CG13506	99.26853004	0.982454965	0.178361802	5.508213941	3.62E-08	5.20E-07
FBgn0032746	CG10470	488.8161397	-0.857890086	0.155814019	-5.505859448	3.67E-08	5.26E-07
FBgn0266557	kis	217.6422723	1.38540411	0.251890467	5.500025966	3.80E-08	5.43E-07
FBgn0021795	Tapdelta	1800.080221	-0.88962025	0.161808228	-5.497991429	3.84E-08	5.48E-07
FBgn0033313	Cirl	147.1363819	1.151124752	0.209448689	5.495974966	3.89E-08	5.54E-07
FBgn0035756	unc-13-4A	32.32186476	1.383231436	0.251879988	5.491628965	3.98E-08	5.66E-07
FBgn0250906	Pgk	344.8769884	-1.113845248	0.202861508	-5.490668277	4.00E-08	5.69E-07
FBgn0260745	mfas	65.66633933	1.061580622	0.19345664	5.487434403	4.08E-08	5.78E-07
FBgn0053169	CG33169	232.2825782	-0.75454396	0.137564024	-5.485038442	4.13E-08	5.85E-07
FBgn0035346	CG1146	63.96181556	0.971966406	0.177252206	5.483522179	4.17E-08	5.89E-07
FBgn0037340	CG14671	118.4020854	-1.13087371	0.206611921	-5.473419471	4.41E-08	6.23E-07
FBgn0085358	Diedel3	38619.06087	-0.882453265	0.161293856	-5.471090377	4.47E-08	6.30E-07
FBgn0051793	CG31793	140.7242283	-0.746350971	0.136475567	-5.46875156	4.53E-08	6.37E-07
FBgn0000116	Argk	3044.868455	-1.176634897	0.215532198	-5.459207071	4.78E-08	6.71E-07
FBgn0033961	ND-B15	843.6477941	-1.094606688	0.200506745	-5.459201327	4.78E-08	6.71E-07
FBgn0051716	Cnot4	74.65342826	0.889463822	0.162950688	5.458484594	4.80E-08	6.72E-07
FBgn0032901	sky	160.5081719	1.267880793	0.232555891	5.451940112	4.98E-08	6.96E-07
FBgn0031117	GstT3	96.87930442	-0.87408295	0.160432452	-5.448292666	5.09E-08	7.10E-07
FBgn0031432	Cyp309a1	511.8666314	-1.475067979	0.270912769	-5.444807873	5.19E-08	7.23E-07
FBgn0026088	CG14818	903.665112	-1.100501546	0.202202277	-5.442577401	5.25E-08	7.31E-07
FBgn0032839	CG10659	245.7635113	-1.591759216	0.292588697	-5.440262166	5.32E-08	7.39E-07
FBgn0024289	Sodh-1	133.4569565	-1.334358227	0.245349703	-5.43859727	5.37E-08	7.44E-07
FBgn0051301	CG31301	78.95128685	0.967474583	0.17789383	5.438494303	5.37E-08	7.44E-07
FBgn0032925	CG9246	98.33155413	0.879344125	0.161718537	5.43749741	5.40E-08	7.47E-07
FBgn0000261	Cat	1461.939173	-0.783698222	0.144161208	-5.436262862	5.44E-08	7.51E-07
FBgn0034733	CG4752	250.8638231	-0.743071516	0.136725978	-5.434750057	5.49E-08	7.56E-07
FBgn0003870	ttk	93.480915	1.04331665	0.192006799	5.433748468	5.52E-08	7.59E-07
FBgn0087013	Karybeta3	271.1508092	0.555761029	0.102291776	5.433095917	5.54E-08	7.61E-07
FBgn0005632	faf	119.0840167	0.929037188	0.171280529	5.424067709	5.83E-08	7.99E-07
FBgn0024291	Sirt1	80.61080173	1.012788485	0.186968772	5.416885787	6.06E-08	8.31E-07
FBgn0052039	CG32039	157.3079379	-1.059327793	0.195657018	-5.414208014	6.16E-08	8.42E-07
FBgn0013678	mt:Cyt-b	33037.95245	-1.15324755	0.213202933	-5.409154238	6.33E-08	8.65E-07
FBgn0028662	VhaPPA1-1	4694.631035	-0.776245223	0.143707399	-5.40156753	6.61E-08	9.01E-07
FBgn0000565	Eip71CD	828.6532619	-1.69887853	0.314824159	-5.396277516	6.80E-08	9.26E-07
FBgn0031474	CG2991	103.2724954	1.044609087	0.193832472	5.389236764	7.08E-08	9.61E-07
FBgn0264894	CG44085	27.61339307	1.502249763	0.278762647	5.388992308	7.09E-08	9.61E-07
FBgn0050456	CG30456	165.1670192	0.880403534	0.163383281	5.388577894	7.10E-08	9.62E-07
FBgn0039774	CDase	244.7192732	-0.902928579	0.167625413	-5.386585248	7.18E-08	9.71E-07
FBgn0035415	CG14966	60.34098347	-0.96431992	0.179147444	-5.382828239	7.33E-08	9.90E-07
FBgn0035189	CG9119	145.2269194	-1.566757251	0.291344387	-5.377681267	7.55E-08	1.02E-06
FBgn0038974	CG5377	57.7614807	-1.116145011	0.207613807	-5.376063501	7.61E-08	1.02E-06
FBgn0266430	CG45060	27.74361058	1.312782015	0.2441813	5.376259419	7.60E-08	1.02E-06
FBgn0003189	r	44.89249931	1.176323841	0.218846548	5.375108057	7.65E-08	1.03E-06
FBgn0016754	sba	57.29818875	1.003465989	0.186829869	5.37101479	7.83E-08	1.05E-06
FBgn0040985	CG6115	327.8971371	0.800801818	0.149154055	5.368957739	7.92E-08	1.06E-06
FBgn0025724	beta'COP	209.2356662	-0.687020137	0.12816384	-5.360483419	8.30E-08	1.11E-06
FBgn0029828	CG6067	392.947709	-0.911926054	0.17031509	-5.354346772	8.59E-08	1.15E-06
FBgn0002719	Men	763.0114025	-1.012162299	0.189052632	-5.353865159	8.61E-08	1.15E-06
FBgn0031245	CG3625	1456.886688	-1.088178727	0.203328045	-5.351837849	8.71E-08	1.16E-06
FBgn0037090	Est-Q	228.1480846	-0.93146281	0.174060649	-5.351369284	8.73E-08	1.16E-06
FBgn0031836	CG11050	179.4678276	-0.890092902	0.166510159	-5.34557715	9.01E-08	1.20E-06
FBgn0265177	CG44242	493.855008	-0.889543883	0.166437915	-5.3445988	9.06E-08	1.20E-06
FBgn0025631	moody	21.2062772	2.030561209	0.380024133	5.343242791	9.13E-08	1.21E-06
FBgn0029899	CG14438	99.82588016	1.398967737	0.261821918	5.343203308	9.13E-08	1.21E-06
FBgn0051266	CG31266	2180.533192	-1.195500635	0.223828093	-5.341155426	9.24E-08	1.22E-06
FBgn0264495	gpp	80.1434866	1.06525814	0.199433754	5.341413463	9.22E-08	1.22E-06
FBgn0043783	CG32444	142.6245738	-1.443711594	0.270338113	-5.340392355	9.27E-08	1.22E-06
FBgn0027348	bgm	335.0633346	-0.955752031	0.179120276	-5.335811523	9.51E-08	1.25E-06
FBgn0038482	CG4053	382.4380115	-0.933098513	0.174899512	-5.335054987	9.55E-08	1.25E-06
FBgn0030237	CG15209	586.055549	-0.55315956	0.103862921	-5.325861762	1.00E-07	1.32E-06
FBgn0003093	Pkc98E	110.0311047	0.931727348	0.175096831	5.321211925	1.03E-07	1.35E-06
FBgn0038376	Hmt-1	381.7135228	-0.579593817	0.108954855	-5.319577685	1.04E-07	1.36E-06
FBgn0017581	Lk6	1602.729338	0.764284069	0.143757256	5.316490394	1.06E-07	1.38E-06
FBgn0031571	bark	61.7967583	1.393343974	0.262146162	5.315141617	1.07E-07	1.38E-06
FBgn0035697	CG10163	16.00157972	1.702563406	0.320320652	5.315184628	1.07E-07	1.38E-06
FBgn0031436	ND-B17.2	656.1931856	-0.556604559	0.104803469	-5.310936423	1.09E-07	1.41E-06
FBgn0013676	mt:CoIII	37716.77342	-0.957243672	0.180348248	-5.307751437	1.11E-07	1.44E-06
FBgn0025709	CG8083	1188.337077	-0.775056434	0.146231475	-5.300202545	1.16E-07	1.50E-06
FBgn0031004	CG7992	265.5720877	-0.689765136	0.130147121	-5.299887788	1.16E-07	1.50E-06
FBgn0003714	tko	222.7415432	-1.047735984	0.197725203	-5.29895009	1.16E-07	1.50E-06
FBgn0034426	CG10476	5.435098867	-5.699845251	1.075614059	-5.29915466	1.16E-07	1.50E-06
FBgn0027339	jim	144.0810353	1.149370406	0.216922228	5.298536791	1.17E-07	1.50E-06
FBgn0035495	CG14989	356.25203	-0.617824201	0.116691853	-5.294493004	1.19E-07	1.53E-06
FBgn0033998	row	41.44230913	1.120935686	0.211877862	5.290480448	1.22E-07	1.56E-06
FBgn0040364	CG11378	1751.163336	-0.870475216	0.164542782	-5.290266797	1.22E-07	1.56E-06
FBgn0038651	CG14299	41.44189997	1.174714688	0.222161711	5.287655937	1.24E-07	1.58E-06
FBgn0016687	Nurf-38	529.9824206	-0.738614178	0.139787471	-5.283836763	1.27E-07	1.61E-06
FBgn0039315	CG13658	192.8735113	-1.007100707	0.190597753	-5.283906492	1.26E-07	1.61E-06
FBgn0259984	kuz	50.52044453	1.253011493	0.237159879	5.283404176	1.27E-07	1.61E-06
FBgn0027359	Tim8	364.6024153	-0.689150021	0.130479342	-5.281679159	1.28E-07	1.63E-06
FBgn0038858	CG5793	201.9208275	-1.807057959	0.342398686	-5.277642799	1.31E-07	1.66E-06
FBgn0028953	CG14478	90.1330531	1.40375336	0.266039343	5.276487842	1.32E-07	1.67E-06
FBgn0038595	CG7142	55.32202061	1.027111771	0.19466408	5.276329213	1.32E-07	1.67E-06
FBgn0039120	Nup98-96	46.67916092	1.058928734	0.200744122	5.275017387	1.33E-07	1.68E-06
FBgn0032642	CG5110	116.3031687	-0.837179523	0.15874499	-5.273738222	1.34E-07	1.69E-06
FBgn0021906	RFeSP	1198.059407	-0.830627312	0.15752713	-5.272915913	1.34E-07	1.69E-06
FBgn0022700	Cht4	877.1361323	1.167820277	0.221501289	5.272295625	1.35E-07	1.70E-06
FBgn0023537	CG17896	595.4967047	-0.627715671	0.1190845	-5.271178638	1.36E-07	1.70E-06
FBgn0022238	lolal	123.2180312	1.234819447	0.234401902	5.267958315	1.38E-07	1.73E-06
FBgn0015288	RpL22	427.3280698	1.48190548	0.281370355	5.266743472	1.39E-07	1.74E-06
FBgn0039205	CG13623	124.0262617	-1.028566948	0.195290659	-5.266851758	1.39E-07	1.74E-06
FBgn0013343	Syx1A	286.534147	0.969469409	0.184314572	5.25986305	1.44E-07	1.80E-06
FBgn0033159	Dscam1	12.88036071	1.927383215	0.366466051	5.259377264	1.45E-07	1.80E-06
FBgn0259152	Clbn	74.22240598	1.204884784	0.229214151	5.256589863	1.47E-07	1.83E-06
FBgn0027564	CG3149	171.0539258	-1.11859236	0.212979794	-5.252105554	1.50E-07	1.87E-06
FBgn0014391	sun	1345.097635	-0.929435016	0.17701172	-5.250697608	1.52E-07	1.88E-06
FBgn0014877	Roe1	244.4035449	-0.727482768	0.13893507	-5.236134884	1.64E-07	2.03E-06
FBgn0250753	kra	366.4872838	1.137310512	0.217195177	5.236352517	1.64E-07	2.03E-06
FBgn0023172	RhoGEF2	42.34915759	1.706711441	0.326128033	5.233255857	1.67E-07	2.06E-06
FBgn0039359	RpL27	9111.79723	0.840431313	0.160691844	5.230080695	1.69E-07	2.09E-06
FBgn0265082	Cdep	152.0178492	1.141339313	0.218267203	5.229092138	1.70E-07	2.10E-06
FBgn0036738	CG7542	6830.756012	-1.035393698	0.198114909	-5.226228056	1.73E-07	2.13E-06
FBgn0035718	CG14820	724.9634093	1.183117482	0.22650365	5.223392579	1.76E-07	2.16E-06
FBgn0038088	CG10126	48.74442416	1.111412246	0.2128018	5.222757734	1.76E-07	2.17E-06
FBgn0086347	Myo31DF	290.0852376	0.611593658	0.117255418	5.215909575	1.83E-07	2.24E-06
FBgn0010213	Sod2	329.9850247	-0.557007098	0.106804261	-5.215214215	1.84E-07	2.25E-06
FBgn0026869	Thd1	28.28688094	1.469164455	0.281793433	5.213622041	1.85E-07	2.27E-06
FBgn0036727	CG7589	314.152319	0.669945376	0.128708063	5.205154689	1.94E-07	2.37E-06
FBgn0033982	Cyp317a1	226.0057121	0.821482601	0.157880951	5.203177416	1.96E-07	2.39E-06
FBgn0261872	scaf6	46.74742757	1.025094165	0.197040105	5.202464581	1.97E-07	2.40E-06
FBgn0000455	Dip-C	721.7796071	-1.081281215	0.208016596	-5.198052625	2.01E-07	2.45E-06
FBgn0051635	CG31635	156.1588476	1.026085121	0.197594742	5.192876638	2.07E-07	2.52E-06
FBgn0036257	RhoGAP68F	78.11430066	1.064777851	0.205154636	5.190123262	2.10E-07	2.55E-06
FBgn0023495	Lip3	46.47914942	-1.74739996	0.336839085	-5.187640146	2.13E-07	2.58E-06
FBgn0030574	CG9413	222.1384887	-1.298648344	0.250363692	-5.187047421	2.14E-07	2.59E-06
FBgn0033048	CG7881	102.9400556	-0.747458003	0.144108078	-5.186787677	2.14E-07	2.59E-06
FBgn0036668	CG9715	36.36374332	1.727176778	0.333181126	5.183897422	2.17E-07	2.62E-06
FBgn0003175	px	147.1863485	0.748063836	0.144386762	5.180972444	2.21E-07	2.66E-06
FBgn0030148	CG3106	220.5959312	-1.153845756	0.222698613	-5.181198652	2.20E-07	2.66E-06
FBgn0031459	CG2862	815.8725818	-0.962747735	0.186023575	-5.175407127	2.27E-07	2.73E-06
FBgn0086686	l(3)L1231	159.8597575	1.267524372	0.244914095	5.175383517	2.27E-07	2.73E-06
FBgn0017567	ND-23	379.2248617	-0.560518965	0.108392362	-5.171203538	2.33E-07	2.79E-06
FBgn0010786	l(3)02640	136.3279779	-0.629939403	0.12183113	-5.170594764	2.33E-07	2.79E-06
FBgn0250754	CG42232	31.22129055	1.325746076	0.256434188	5.169927177	2.34E-07	2.80E-06
FBgn0015791	Rab14	149.7435384	0.638582978	0.123533782	5.169298357	2.35E-07	2.81E-06
FBgn0034061	CG8386	218.4128818	-1.259821335	0.243804533	-5.167341727	2.37E-07	2.83E-06
FBgn0032817	CG10631	23.84479073	1.35979627	0.263285856	5.164714475	2.41E-07	2.87E-06
FBgn0261439	SdhA	1001.930754	-0.415279176	0.080428779	-5.163315682	2.43E-07	2.89E-06
FBgn0015380	drl	47.83304345	1.721596304	0.333703863	5.159054171	2.48E-07	2.95E-06
FBgn0021765	scu	561.4712343	-0.853109816	0.165486763	-5.155154416	2.53E-07	3.01E-06
FBgn0015039	Cyp9b2	947.1909987	-0.949767349	0.184264344	-5.15437403	2.54E-07	3.01E-06
FBgn0027885	Aac11	298.6950039	1.11857479	0.217091077	5.15255995	2.57E-07	3.04E-06
FBgn0029870	Marf	557.3207255	0.615735061	0.119524101	5.151555682	2.58E-07	3.05E-06
FBgn0032453	CG6180	644.613962	-1.201247647	0.233359495	-5.147627038	2.64E-07	3.11E-06
FBgn0014868	Ost48	353.9031764	-1.083666927	0.210673463	-5.143822637	2.69E-07	3.17E-06
FBgn0260659	CG42542	101.7059242	-0.742621646	0.144574385	-5.136605957	2.80E-07	3.29E-06
FBgn0263396	sqd	2007.923664	0.518987289	0.101378749	5.119290697	3.07E-07	3.60E-06
FBgn0032235	CG5096	4123.092996	-0.608778191	0.11902113	-5.114874922	3.14E-07	3.68E-06
FBgn0052479	Usp10	123.9691151	1.358310144	0.265659207	5.112979744	3.17E-07	3.72E-06
FBgn0031312	Tango14	278.7765426	-0.57378344	0.112232925	-5.112434155	3.18E-07	3.72E-06
FBgn0035169	CG13890	20.27345871	-1.523000323	0.297946636	-5.111654708	3.19E-07	3.73E-06
FBgn0039741	CG7943	180.355273	-0.582145002	0.113912655	-5.110450651	3.21E-07	3.75E-06
FBgn0033608	CG13220	358.7788382	-0.851106638	0.166804769	-5.102411887	3.35E-07	3.91E-06
FBgn0062442	Cisd2	835.9680532	-1.077212514	0.211173987	-5.101066331	3.38E-07	3.93E-06
FBgn0058045	CG40045	645.0041994	-0.87459456	0.17149138	-5.099933062	3.40E-07	3.95E-06
FBgn0010215	alpha-Cat	117.770326	1.201669408	0.23581158	5.095888036	3.47E-07	4.03E-06
FBgn0011481	Ssdp	205.9867847	0.647187961	0.127012437	5.095469195	3.48E-07	4.03E-06
FBgn0030960	Atg101	81.90790212	1.158873728	0.227439267	5.095310693	3.48E-07	4.03E-06
FBgn0033802	CG17724	16.9894404	1.719794138	0.33756734	5.094669817	3.49E-07	4.04E-06
FBgn0030367	Cyp311a1	67.85247217	-1.143509298	0.2244911	-5.093784548	3.51E-07	4.05E-06
FBgn0030777	CG9672	5134.459461	-1.737284342	0.341066626	-5.093680268	3.51E-07	4.05E-06
FBgn0040899	CG17776	134.9338182	-0.899792207	0.176662646	-5.093279357	3.52E-07	4.05E-06
FBgn0069923	CG41128	3144.354584	-1.012225603	0.198737019	-5.093291671	3.52E-07	4.05E-06
FBgn0031544	CG17593	206.1232123	-1.098756911	0.215877801	-5.089716994	3.59E-07	4.12E-06
FBgn0028331	l(1)G0289	364.0332722	0.72573639	0.142641811	5.087823717	3.62E-07	4.16E-06
FBgn0261671	tweek	22.97017529	1.812190981	0.35630214	5.086107481	3.65E-07	4.19E-06
FBgn0029888	ND-ASHI	422.2130859	-0.531872269	0.104610421	-5.084314384	3.69E-07	4.22E-06
FBgn0024555	flfl	59.53766887	1.257881821	0.24797309	5.07265454	3.92E-07	4.49E-06
FBgn0035348	CG16758	72.88665425	-1.083959316	0.213741742	-5.071350629	3.95E-07	4.51E-06
FBgn0033350	CG8237	89.78328428	-0.819503808	0.161605585	-5.071011666	3.96E-07	4.51E-06
FBgn0001247	Ide	77.63050803	1.162649362	0.22931606	5.070073852	3.98E-07	4.53E-06
FBgn0011739	wts	118.6161668	0.691955168	0.136513187	5.068778952	4.00E-07	4.55E-06
FBgn0040372	G9a	88.94688945	1.621711049	0.32024473	5.063974196	4.11E-07	4.66E-06
FBgn0033766	CG8771	11.16845037	1.984996411	0.392020499	5.06350156	4.12E-07	4.67E-06
FBgn0026565	CG1315	1496.132622	-0.933816925	0.184617654	-5.058112822	4.23E-07	4.80E-06
FBgn0260934	par-1	577.6417879	0.835711083	0.165305248	5.055562936	4.29E-07	4.86E-06
FBgn0037344	CG2926	106.7674978	1.047581153	0.207377645	5.051562593	4.38E-07	4.95E-06
FBgn0261934	dikar	77.43735556	1.898464418	0.375945985	5.049832936	4.42E-07	4.99E-06
FBgn0036806	Cyp12c1	179.9028079	-0.665555432	0.132055698	-5.039959956	4.66E-07	5.25E-06
FBgn0086451	l(2)k09022	39.23611602	1.51461676	0.300530625	5.03980837	4.66E-07	5.25E-06
FBgn0034417	CG15117	113.7856202	0.831526712	0.165098921	5.036536306	4.74E-07	5.33E-06
FBgn0035401	CG1291	158.9553051	-0.88876491	0.176543101	-5.034265877	4.80E-07	5.39E-06
FBgn0035232	CG12099	113.6747831	1.169757687	0.232370807	5.034013097	4.80E-07	5.39E-06
FBgn0029507	Tsp42Ed	823.4948399	0.788470741	0.156693186	5.031940186	4.86E-07	5.44E-06
FBgn0032820	fbp	174.1109307	-1.246456892	0.247726129	-5.03159233	4.86E-07	5.44E-06
FBgn0033999	CG8093	1087.432264	-1.123226241	0.22327912	-5.030592387	4.89E-07	5.46E-06
FBgn0038269	Rrp6	23.05186976	1.250456127	0.248986226	5.022189971	5.11E-07	5.70E-06
FBgn0032156	CG13124	93.61745362	1.107257175	0.220497556	5.021630156	5.12E-07	5.71E-06
FBgn0022774	Oat	31.55555541	-1.585784048	0.316420203	-5.011639688	5.40E-07	6.01E-06
FBgn0030973	CG7332	163.6463138	0.600841111	0.119894943	5.011396609	5.40E-07	6.01E-06
FBgn0022069	Nnp-1	43.91306201	1.093320178	0.218280088	5.008794845	5.48E-07	6.08E-06
FBgn0032717	CG10600	83.77501776	0.861139414	0.171969383	5.00751587	5.51E-07	6.11E-06
FBgn0087007	bbg	385.2950127	1.175902996	0.234837577	5.007303399	5.52E-07	6.11E-06
FBgn0034215	Mtap	136.2726535	-0.866938635	0.173180439	-5.005984748	5.56E-07	6.15E-06
FBgn0000473	Cyp6a2	34.42235099	-2.078955701	0.415428189	-5.004368399	5.60E-07	6.19E-06
FBgn0021979	l(2)k09913	547.5952147	-0.59741969	0.119418992	-5.002719261	5.65E-07	6.24E-06
FBgn0003345	sd	263.5329602	0.632184507	0.126440984	4.999838541	5.74E-07	6.32E-06
FBgn0026262	bip2	179.7131368	1.454817512	0.290970672	4.999876806	5.74E-07	6.32E-06
FBgn0003638	su(w[a])	55.13665733	1.102758777	0.220734691	4.995856212	5.86E-07	6.43E-06
FBgn0263392	Tet	111.535336	1.260608748	0.252319446	4.996082422	5.85E-07	6.43E-06
FBgn0000566	Eip55E	313.2115472	-0.566769749	0.113559932	-4.990930681	6.01E-07	6.59E-06
FBgn0032603	CG17928	56.38574821	-1.121768977	0.224828064	-4.989452647	6.06E-07	6.63E-06
FBgn0029785	RpL35	8973.488838	0.626352474	0.125565039	4.988271252	6.09E-07	6.66E-06
FBgn0026160	tna	235.6676257	0.972126944	0.19509512	4.982835784	6.27E-07	6.85E-06
FBgn0036018	CG3335	38.23273013	0.973161133	0.195346799	4.98171017	6.30E-07	6.88E-06
FBgn0003429	slo	69.98258405	1.203585323	0.241752483	4.978585145	6.41E-07	6.98E-06
FBgn0023076	Clk	12.60790803	1.855853469	0.372787921	4.978309019	6.41E-07	6.98E-06
FBgn0067779	dbr	16.26133322	1.930485925	0.38779868	4.978062137	6.42E-07	6.98E-06
FBgn0050360	Mal-A6	6884.057201	-1.12760699	0.226591245	-4.97639257	6.48E-07	7.03E-06
FBgn0036814	CG14073	52.67504925	1.075698503	0.21629067	4.973392992	6.58E-07	7.14E-06
FBgn0036035	CG18178	21.26694582	1.572235676	0.316303376	4.970657264	6.67E-07	7.23E-06
FBgn0032668	CG17681	10.37397616	-2.424451949	0.487873447	-4.96942796	6.72E-07	7.27E-06
FBgn0031883	Caper	245.7659086	0.674285901	0.135848425	4.963516519	6.92E-07	7.48E-06
FBgn0036576	CG5151	163.8246099	1.205825663	0.243058758	4.961045933	7.01E-07	7.57E-06
FBgn0038832	CG15695	14.84298941	1.907876942	0.384741529	4.958853663	7.09E-07	7.64E-06
FBgn0053966	CG33966	243.575282	-0.749742065	0.151200129	-4.958607306	7.10E-07	7.64E-06
FBgn0040907	mRpL33	356.702257	-0.667328846	0.134643282	-4.956272885	7.19E-07	7.73E-06
FBgn0033226	CG1882	322.5621422	-0.7505584	0.151605729	-4.950725827	7.39E-07	7.94E-06
FBgn0053208	Mical	36.74753995	1.427905282	0.288449506	4.950278126	7.41E-07	7.95E-06
FBgn0032160	CG4598	392.7860165	-0.765794819	0.154756074	-4.948399096	7.48E-07	8.02E-06
FBgn0015282	Rpt2	704.8947317	-0.656540375	0.132722382	-4.946719349	7.55E-07	8.08E-06
FBgn0044812	TotC	13.49548155	2.338734212	0.472807727	4.946480527	7.56E-07	8.08E-06
FBgn0262733	Src64B	105.6092849	1.041382425	0.210552123	4.94596023	7.58E-07	8.09E-06
FBgn0010590	Prosbeta1	404.8911965	-0.706611533	0.142888166	-4.945206805	7.61E-07	8.10E-06
FBgn0029529	CG13365	149.7426873	-0.676152582	0.136723831	-4.945389389	7.60E-07	8.10E-06
FBgn0036514	CG12301	32.6076102	1.395103315	0.282283667	4.942203465	7.72E-07	8.22E-06
FBgn0034717	CG5819	198.945915	0.610424907	0.123548255	4.94078128	7.78E-07	8.27E-06
FBgn0039473	CG17191	8.713293721	-2.982392504	0.603795157	-4.939411102	7.84E-07	8.32E-06
FBgn0031752	CG9044	43.12653841	1.275283647	0.258226406	4.938626022	7.87E-07	8.34E-06
FBgn0020309	crol	163.60829	0.90873493	0.184022993	4.938159725	7.89E-07	8.35E-06
FBgn0011224	heph	23.26274719	1.566243158	0.317590129	4.931649359	8.15E-07	8.62E-06
FBgn0023516	Pex5	707.0621572	-0.983604673	0.199522033	-4.929804773	8.23E-07	8.68E-06
FBgn0032726	CG10621	340.3824701	-0.965783235	0.195899482	-4.929993817	8.22E-07	8.68E-06
FBgn0027590	GstE12	3825.787331	-0.598284185	0.121414065	-4.9276349	8.32E-07	8.77E-06
FBgn0033244	CG8726	74.60119066	1.057591989	0.214875164	4.92189031	8.57E-07	9.02E-06
FBgn0039068	CG13827	130.0587411	-0.783478267	0.159228251	-4.920472722	8.63E-07	9.07E-06
FBgn0034225	veil	1148.332033	-0.751064701	0.152656163	-4.919976283	8.66E-07	9.09E-06
FBgn0011284	RpS4	8078.240994	0.597943161	0.121641625	4.915613067	8.85E-07	9.28E-06
FBgn0263987	spoon	591.4700673	0.634084712	0.129012558	4.914906889	8.88E-07	9.30E-06
FBgn0035871	BI-1	434.0653488	-0.819856177	0.166936115	-4.911197173	9.05E-07	9.47E-06
FBgn0051087	CG31087	503.500652	-0.764914171	0.155806035	-4.90940015	9.14E-07	9.55E-06
FBgn0085753	28SrRNA-Psi:CR40596	917.0474644	-4.153775553	0.846718582	-4.905733312	9.31E-07	9.71E-06
FBgn0035688	CG10289	142.1654344	1.057813633	0.215803736	4.901739196	9.50E-07	9.90E-06
FBgn0027330	l(1)G0020	42.47859085	0.942863545	0.192413727	4.900188575	9.57E-07	9.97E-06
FBgn0031708	CG7382	187.6933255	-0.880545622	0.179899009	-4.894666324	9.85E-07	1.02E-05
FBgn0030239	CG17333	448.3432578	-1.196367872	0.244500856	-4.89310299	9.93E-07	1.03E-05
FBgn0037166	CG11426	128.7209473	-0.962859962	0.19681096	-4.89230866	9.97E-07	1.03E-05
FBgn0000567	Eip74EF	43.45340661	0.972115368	0.198799585	4.889926534	1.01E-06	1.04E-05
FBgn0028327	l(1)G0320	682.6002741	-0.635728264	0.129997395	-4.890315427	1.01E-06	1.04E-05
FBgn0052264	CG32264	278.8107137	0.671743975	0.137371506	4.889980435	1.01E-06	1.04E-05
FBgn0261800	LanB1	37.04400875	1.214929679	0.248435847	4.890315524	1.01E-06	1.04E-05
FBgn0033357	Tom7	4926.348063	-0.776852338	0.158888101	-4.889304687	1.01E-06	1.04E-05
FBgn0040396	CG3939	469.2711973	-0.798105191	0.163253341	-4.888752585	1.01E-06	1.05E-05
FBgn0023528	CG2924	130.3343168	1.11482792	0.228057604	4.888361095	1.02E-06	1.05E-05
FBgn0004587	B52	229.0105112	0.623027167	0.127458601	4.888074725	1.02E-06	1.05E-05
FBgn0004638	drk	100.1881271	0.848267401	0.173608921	4.886081868	1.03E-06	1.06E-05
FBgn0005536	Mbs	95.00641668	0.965879527	0.197688031	4.885877623	1.03E-06	1.06E-05
FBgn0029117	Surf1	56.82078637	-0.901683959	0.184669282	-4.882695967	1.05E-06	1.07E-05
FBgn0038752	CG4462	151.0636566	-0.778341382	0.159520168	-4.879266308	1.06E-06	1.09E-05
FBgn0034782	CG12490	13.01221768	-2.305359196	0.473260699	-4.871224674	1.11E-06	1.13E-05
FBgn0031824	CG9547	48.42476674	-1.290028679	0.26485233	-4.870746948	1.11E-06	1.13E-05
FBgn0036887	CG9231	123.2199821	-0.933731785	0.191718396	-4.870329628	1.11E-06	1.14E-05
FBgn0032166	CG4619	40.51934483	0.957959903	0.196705136	4.870029954	1.12E-06	1.14E-05
FBgn0004657	mys	283.3825214	0.91150295	0.187464914	4.862258917	1.16E-06	1.18E-05
FBgn0053126	NLaz	779.050698	-0.885329913	0.182121474	-4.861205519	1.17E-06	1.19E-05
FBgn0034300	CG5098	8.510064379	2.34699218	0.482889948	4.860304483	1.17E-06	1.19E-05
FBgn0037973	CG18547	1297.4292	-1.188943359	0.244879178	-4.855224392	1.20E-06	1.22E-05
FBgn0037341	CG12746	205.403638	-0.653919606	0.134726787	-4.853671796	1.21E-06	1.23E-05
FBgn0031428	CG9886	36.9691271	-1.087902911	0.22425218	-4.851247871	1.23E-06	1.24E-05
FBgn0035165	CG13887	1116.889531	-0.694992325	0.143335763	-4.848701471	1.24E-06	1.26E-05
FBgn0002641	mal	60.67623573	-0.977419959	0.201725804	-4.845289693	1.26E-06	1.28E-05
FBgn0040660	CG13551	1066.0539	-0.791399521	0.163351286	-4.84477068	1.27E-06	1.28E-05
FBgn0085353	CG34324	5428.209861	1.245097693	0.2570062	4.844621233	1.27E-06	1.28E-05
FBgn0035722	CG10075	198.9789475	-0.78370627	0.16177821	-4.844325261	1.27E-06	1.28E-05
FBgn0259209	Mlp60A	2441.26926	-1.052136909	0.217234015	-4.843334089	1.28E-06	1.28E-05
FBgn0031590	CG3702	319.2915315	-0.775777567	0.160202409	-4.842483768	1.28E-06	1.29E-05
FBgn0052379	CG32379	314.5406485	-0.626936274	0.129465238	-4.842506655	1.28E-06	1.29E-05
FBgn0267365	l(2)SH0834	143.0547909	-0.79407536	0.164041847	-4.840687758	1.29E-06	1.30E-05
FBgn0261983	l(2)gd1	43.80021299	1.115646922	0.230612024	4.837765618	1.31E-06	1.31E-05
FBgn0038415	CG17929	28.60646266	1.265349511	0.261624468	4.836510598	1.32E-06	1.32E-05
FBgn0020655	ArfGAP1	230.0426181	-0.713049078	0.147507666	-4.833979817	1.34E-06	1.34E-05
FBgn0015903	apt	15.35098879	1.700628033	0.352573857	4.823466068	1.41E-06	1.41E-05
FBgn0034059	CG8320	508.8594598	-0.87504475	0.181521368	-4.820615662	1.43E-06	1.42E-05
FBgn0010660	Nup214	37.52923659	1.094408818	0.227056823	4.819977666	1.44E-06	1.43E-05
FBgn0037360	CG2182	241.9435854	0.869575398	0.180404201	4.820150495	1.43E-06	1.43E-05
FBgn0039259	CG11781	454.0897753	-0.947882747	0.196668099	-4.819707686	1.44E-06	1.43E-05
FBgn0033518	Prx2540-2	37.63730079	-1.481702414	0.307641641	-4.816325938	1.46E-06	1.45E-05
FBgn0262127	kibra	67.56732183	1.765811582	0.366763386	4.814579785	1.48E-06	1.46E-05
FBgn0266350	CR44999	8.755428533	2.294991774	0.4768897	4.812416321	1.49E-06	1.47E-05
FBgn0039909	ND-49	960.1377938	-0.501278253	0.10419028	-4.81118061	1.50E-06	1.48E-05
FBgn0000416	Sap-r	424.4881046	1.132372813	0.235377933	4.810870751	1.50E-06	1.48E-05
FBgn0033717	CG8839	629.2925089	-0.521001099	0.108307413	-4.810391889	1.51E-06	1.48E-05
FBgn0036980	RhoBTB	35.20470838	1.133671874	0.235681179	4.810192644	1.51E-06	1.48E-05
FBgn0001168	h	696.0627398	1.039912444	0.216211146	4.809707836	1.51E-06	1.49E-05
FBgn0003520	stau	47.22247553	1.161891077	0.241600551	4.809140843	1.52E-06	1.49E-05
FBgn0032218	CG5381	36.32051684	1.276381306	0.265497709	4.807504034	1.53E-06	1.50E-05
FBgn0083984	CG34148	34.32069861	-0.965840679	0.20092426	-4.806988863	1.53E-06	1.50E-05
FBgn0040777	CG14767	95.36333101	0.9181837	0.191042582	4.806173007	1.54E-06	1.51E-05
FBgn0039857	RpL6	5894.260162	0.404045552	0.084091387	4.80483875	1.55E-06	1.51E-05
FBgn0033241	CG2915	217.5669488	-0.650656501	0.135430381	-4.80436146	1.55E-06	1.52E-05
FBgn0050392	CG30392	151.5586669	-0.837827285	0.174583397	-4.79900894	1.59E-06	1.56E-05
FBgn0030688	CG8952	1797.856257	-0.727936029	0.151711075	-4.798173294	1.60E-06	1.56E-05
FBgn0029903	pod1	46.07264611	0.961663143	0.200461146	4.797254536	1.61E-06	1.57E-05
FBgn0002939	ninaD	363.8184384	-1.191224675	0.248434988	-4.794915108	1.63E-06	1.58E-05
FBgn0030720	CG8939	40.6809417	1.270053857	0.264936094	4.79381212	1.64E-06	1.59E-05
FBgn0031260	Spp	221.3076696	-0.609672482	0.127181979	-4.793701797	1.64E-06	1.59E-05
FBgn0013685	mt:ND6	111.9490023	-1.813707531	0.378701642	-4.789278237	1.67E-06	1.62E-05
FBgn0000250	cact	120.1371051	0.787701541	0.164800047	4.779740987	1.76E-06	1.70E-05
FBgn0019968	Khc-73	94.07813344	1.103822368	0.230981413	4.778836337	1.76E-06	1.71E-05
FBgn0028577	pUf68	97.01778249	0.913572796	0.191303014	4.775527458	1.79E-06	1.73E-05
FBgn0036740	Vps60	226.8835166	-0.697752946	0.146165966	-4.773703243	1.81E-06	1.75E-05
FBgn0033402	Myd88	237.0854409	0.6293922	0.131963914	4.769426587	1.85E-06	1.78E-05
FBgn0020621	Pkn	105.3609155	0.888907554	0.186430772	4.768030223	1.86E-06	1.79E-05
FBgn0032615	CG6012	29.00070483	1.657486247	0.347650935	4.767673772	1.86E-06	1.79E-05
FBgn0016059	Sema-1b	35.37546408	1.147210978	0.240640765	4.767317705	1.87E-06	1.79E-05
FBgn0037110	ORMDL	210.2422268	-0.574972038	0.120651599	-4.765556709	1.88E-06	1.81E-05
FBgn0263776	CG43693	194.414088	0.686322963	0.144016664	4.765580192	1.88E-06	1.81E-05
FBgn0040512	zetaCOP	774.3349197	-1.12828201	0.236775457	-4.765198311	1.89E-06	1.81E-05
FBgn0028744	CG5033	44.84858074	1.166138762	0.245033792	4.759093638	1.94E-06	1.86E-05
FBgn0022097	Vha36-1	2776.680274	-0.838474544	0.176511395	-4.750257296	2.03E-06	1.94E-05
FBgn0262517	Ltn1	45.04945785	1.054612297	0.222008095	4.750332626	2.03E-06	1.94E-05
FBgn0034951	CG3860	108.269627	0.93213543	0.196257113	4.749562536	2.04E-06	1.94E-05
FBgn0039026	CG7029	125.436227	0.888213193	0.187003545	4.74971312	2.04E-06	1.94E-05
FBgn0033926	Arc1	2756.153416	-0.903171169	0.190174609	-4.749168004	2.04E-06	1.94E-05
FBgn0037024	tzn	355.2165629	-0.771169955	0.162537271	-4.744573055	2.09E-06	1.99E-05
FBgn0003475	spir	159.8420935	1.043958172	0.220193153	4.741101878	2.13E-06	2.02E-05
FBgn0036726	QIL1	411.8674421	-0.862454958	0.181909895	-4.741110757	2.13E-06	2.02E-05
FBgn0004066	Prosalpha4	256.2945297	-0.746181835	0.157434668	-4.739628467	2.14E-06	2.03E-05
FBgn0262608	CG43134	1134.318955	-0.954767424	0.201435771	-4.739810697	2.14E-06	2.03E-05
FBgn0001977	CIAPIN1	55.91625964	-0.904192679	0.190812255	-4.73865097	2.15E-06	2.03E-05
FBgn0031452	Cwc25	22.82306177	1.424564591	0.300627705	4.73863376	2.15E-06	2.03E-05
FBgn0039229	Saf-B	70.32751023	1.017932481	0.214861548	4.737620534	2.16E-06	2.04E-05
FBgn0261113	Xrp1	1914.891336	0.976480536	0.206345558	4.73225858	2.22E-06	2.09E-05
FBgn0038682	CG5835	524.994758	-0.710541237	0.150211024	-4.730286877	2.24E-06	2.11E-05
FBgn0020493	Dad	72.83953001	0.934668405	0.197618271	4.72966595	2.25E-06	2.12E-05
FBgn0030479	Rbp1-like	137.8221945	0.77068162	0.16308575	4.725622072	2.29E-06	2.16E-05
FBgn0260441	RpS12	8604.684909	0.368707637	0.078103507	4.7207565	2.35E-06	2.21E-05
FBgn0037810	sle	10.635098	2.288730676	0.484914453	4.719864839	2.36E-06	2.21E-05
FBgn0027279	l(1)G0196	81.57542192	0.799186782	0.169368836	4.718617663	2.37E-06	2.22E-05
FBgn0039234	nct	16.90311684	1.61247686	0.342007588	4.714740007	2.42E-06	2.26E-05
FBgn0037750	Whamy	194.5342026	0.545168359	0.115667003	4.713257431	2.44E-06	2.28E-05
FBgn0032124	CG17855	88.56185659	0.919726134	0.195239385	4.710761277	2.47E-06	2.30E-05
FBgn0047351	CG31468	7.415041632	-4.044694695	0.858715413	-4.710168971	2.48E-06	2.31E-05
FBgn0259212	cno	18.81943827	1.41116987	0.299708371	4.708476655	2.50E-06	2.33E-05
FBgn0027552	CG10863	423.3867077	-0.584437454	0.124165106	-4.706938003	2.51E-06	2.33E-05
FBgn0031478	CG8814	231.0512399	-0.589183511	0.125173049	-4.706951811	2.51E-06	2.33E-05
FBgn0035137	CG1233	54.04615279	1.106980399	0.235186124	4.706826997	2.52E-06	2.33E-05
FBgn0036756	cln3	585.5969442	-0.614301458	0.130505234	-4.707102079	2.51E-06	2.33E-05
FBgn0030545	CG11590	48.54214597	-0.860935807	0.182949204	-4.70587349	2.53E-06	2.34E-05
FBgn0262952	mt:ND4	11135.23411	-1.154627124	0.245587756	-4.701484895	2.58E-06	2.39E-05
FBgn0031987	CG12375	261.9154224	-0.665004282	0.141529377	-4.698701395	2.62E-06	2.42E-05
FBgn0038842	hdly	237.1074423	1.004579074	0.213795443	4.69878618	2.62E-06	2.42E-05
FBgn0266696	CG45186	336.9230701	0.778651704	0.165759161	4.697488196	2.63E-06	2.43E-05
FBgn0029849	Efr	326.968705	-0.933096654	0.198660766	-4.696934751	2.64E-06	2.44E-05
FBgn0031231	mRpL10	106.0838002	-0.983586837	0.209424787	-4.696611385	2.65E-06	2.44E-05
FBgn0051363	Jupiter	76.72663865	1.064977186	0.22678088	4.696062502	2.65E-06	2.44E-05
FBgn0035106	rno	37.32995733	1.241476759	0.264423596	4.695030167	2.67E-06	2.45E-05
FBgn0265623	Su(z)2	31.97916585	1.096751341	0.233795284	4.691075559	2.72E-06	2.50E-05
FBgn0038462	CG17556	225.2671774	-0.761245512	0.162293203	-4.690556956	2.72E-06	2.50E-05
FBgn0039207	CG5789	52.50285087	1.021497836	0.218166797	4.682187441	2.84E-06	2.60E-05
FBgn0033691	CG8860	511.2675692	-0.539850687	0.115331071	-4.680878136	2.86E-06	2.61E-05
FBgn0036203	Muc68D	9119.514477	2.515608639	0.537910603	4.676629586	2.92E-06	2.67E-05
FBgn0043362	bchs	17.18398239	1.73631661	0.371504399	4.673744416	2.96E-06	2.70E-05
FBgn0017550	Rga	106.9494604	0.614339669	0.131491556	4.672084566	2.98E-06	2.72E-05
FBgn0022224	ubl	120.628359	-0.740594399	0.15851292	-4.67213903	2.98E-06	2.72E-05
FBgn0039831	CG12054	351.1696035	0.695993258	0.149022249	4.670398312	3.01E-06	2.74E-05
FBgn0262617	CG43143	88.89223485	0.948719793	0.203162361	4.669761616	3.02E-06	2.74E-05
FBgn0052113	CG32113	17.94299674	1.339788061	0.286969903	4.668740676	3.03E-06	2.75E-05
FBgn0014135	bnl	59.89544174	1.015275134	0.217570968	4.666409054	3.07E-06	2.78E-05
FBgn0283521	lola	449.0722125	0.635107506	0.13613966	4.665117458	3.08E-06	2.80E-05
FBgn0032587	CG5953	200.3369443	0.80720139	0.173126649	4.662490684	3.12E-06	2.83E-05
FBgn0260857	Bet1	283.2822585	-0.672886688	0.144390034	-4.660201728	3.16E-06	2.86E-05
FBgn0037705	mura	333.6003826	0.725052228	0.155629335	4.658840381	3.18E-06	2.88E-05
FBgn0261954	east	271.3972625	0.754012548	0.161858619	4.658463982	3.19E-06	2.88E-05
FBgn0036993	CG5910	221.7272508	0.588752528	0.126450487	4.655992581	3.22E-06	2.91E-05
FBgn0027620	Acf	38.5405556	0.987344177	0.212150598	4.653977816	3.26E-06	2.93E-05
FBgn0024509	Sec13	225.1663113	-0.914590418	0.196542167	-4.653405574	3.26E-06	2.94E-05
FBgn0000559	EF2	3844.639325	0.595657703	0.128398411	4.639136093	3.50E-06	3.15E-05
FBgn0051715	CG31715	360.47691	-1.003567745	0.216373012	-4.638137342	3.52E-06	3.16E-05
FBgn0035154	CG3344	1787.229378	-0.54332261	0.117214648	-4.635279122	3.56E-06	3.20E-05
FBgn0023530	CG3740	171.5758073	-1.223476895	0.263994256	-4.63448302	3.58E-06	3.21E-05
FBgn0001215	Hrb98DE	199.8214154	0.54039797	0.116619857	4.633841829	3.59E-06	3.22E-05
FBgn0262353	CR43051	693.2171232	-0.789304455	0.170410431	-4.631784859	3.63E-06	3.24E-05
FBgn0036451	CG9425	278.7701228	0.796070936	0.171920636	4.63045598	3.65E-06	3.26E-05
FBgn0030412	Tomosyn	38.71960908	0.936008598	0.20225227	4.627926283	3.69E-06	3.30E-05
FBgn0031711	CG6907	76.4148272	-0.896100454	0.193691525	-4.62643088	3.72E-06	3.32E-05
FBgn0010772	Xe7	111.7068798	0.864460984	0.186905593	4.625121012	3.74E-06	3.34E-05
FBgn0261802	CG42748	108.4421327	0.745133983	0.161314208	4.619146644	3.85E-06	3.43E-05
FBgn0040575	CG15922	187.2340306	-1.192885464	0.258384243	-4.616711343	3.90E-06	3.47E-05
FBgn0033086	CG9410	149.6120053	-0.576668403	0.124946647	-4.615317167	3.92E-06	3.48E-05
FBgn0051717	CG31717	160.9478455	-0.7829471	0.169633857	-4.615511985	3.92E-06	3.48E-05
FBgn0058002	ND-AGGG	89.62846592	-1.273481633	0.27601902	-4.61374594	3.95E-06	3.51E-05
FBgn0024734	PRL-1	391.7878896	1.374560145	0.298229721	4.609064926	4.04E-06	3.58E-05
FBgn0039727	Vps13B	18.1076639	1.407077329	0.305313184	4.608635992	4.05E-06	3.59E-05
FBgn0003502	Btk29A	28.89802814	1.370392965	0.297624605	4.604434378	4.14E-06	3.66E-05
FBgn0263006	SERCA	318.47934	1.156600096	0.251250722	4.603370229	4.16E-06	3.67E-05
FBgn0029761	SK	15.45528037	1.59904491	0.347467631	4.60199675	4.18E-06	3.69E-05
FBgn0031516	CG9663	158.3663932	-0.827616923	0.179884054	-4.600835403	4.21E-06	3.71E-05
FBgn0033235	CG8728	207.7071378	-0.636684788	0.138401748	-4.600265516	4.22E-06	3.72E-05
FBgn0016697	Prosalpha5	489.0572078	-0.794161951	0.172664282	-4.599457062	4.24E-06	3.73E-05
FBgn0085279	CG34250	117.4189532	-0.750042622	0.163085049	-4.599088794	4.24E-06	3.73E-05
FBgn0016078	wun	138.4681696	0.751115196	0.163422472	4.596156142	4.30E-06	3.78E-05
FBgn0015575	alpha-Est7	360.1296455	-0.560189196	0.12190701	-4.595217269	4.32E-06	3.79E-05
FBgn0051102	CG31102	104.7435011	0.826801793	0.180039025	4.592347651	4.38E-06	3.84E-05
FBgn0024179	wit	41.68163546	1.195243096	0.260349553	4.59091665	4.41E-06	3.86E-05
FBgn0085468	ND-MWFE	607.5939814	-0.656998357	0.143105179	-4.591017334	4.41E-06	3.86E-05
FBgn0004401	Pep	131.341651	0.717760106	0.156429861	4.58838294	4.47E-06	3.90E-05
FBgn0014141	cher	26.49130396	1.402285951	0.305611305	4.588462304	4.47E-06	3.90E-05
FBgn0259927	CG42450	29.30963265	1.353615051	0.295023509	4.588159961	4.47E-06	3.90E-05
FBgn0032596	Prosbeta4	668.642455	-0.771795142	0.168244239	-4.587349603	4.49E-06	3.91E-05
FBgn0052767	CG32767	222.2439115	1.03548786	0.225736776	4.587147372	4.49E-06	3.91E-05
FBgn0030638	CG11655	53.67873721	-0.967975733	0.211081504	-4.585791348	4.52E-06	3.93E-05
FBgn0011556	zetaTry	2569.761823	-1.087494246	0.23732693	-4.582262319	4.60E-06	4.00E-05
FBgn0035524	CG11583	41.7052435	1.159301356	0.253130448	4.579857405	4.65E-06	4.04E-05
FBgn0037713	CG16790	61.04106235	-1.083718808	0.236847558	-4.575596297	4.75E-06	4.12E-05
FBgn0039590	CG10011	28.56150191	1.459031053	0.31899998	4.573765342	4.79E-06	4.15E-05
FBgn0036192	Pallidin	242.9119741	-1.146288496	0.250723642	-4.571920243	4.83E-06	4.18E-05
FBgn0010051	Itp-r83A	34.70698237	1.031444394	0.225680665	4.570371117	4.87E-06	4.21E-05
FBgn0264490	Eip93F	820.0211446	0.587769241	0.128615043	4.569988294	4.88E-06	4.21E-05
FBgn0020647	KrT95D	77.86499857	0.917522266	0.201003045	4.564718227	5.00E-06	4.31E-05
FBgn0035632	Ppat-Dpck	320.4369872	-0.758125718	0.166086333	-4.564648429	5.00E-06	4.31E-05
FBgn0043471	kappaTry	3340.911058	-1.147105678	0.25128955	-4.564876167	5.00E-06	4.31E-05
FBgn0034878	pita	23.37325852	1.289800021	0.282617755	4.563761473	5.02E-06	4.32E-05
FBgn0026089	CG14817	199.7196376	-0.933304363	0.204533154	-4.563095737	5.04E-06	4.33E-05
FBgn0040299	Myo28B1	427.93144	0.799824729	0.17529307	4.56278578	5.05E-06	4.33E-05
FBgn0030802	DENR	245.9746899	-0.569378479	0.124870471	-4.559752801	5.12E-06	4.39E-05
FBgn0053303	CG33303	98.92365277	-0.618432186	0.135662022	-4.558624269	5.15E-06	4.41E-05
FBgn0035132	mthl10	67.79307442	0.992077607	0.217646428	4.558207622	5.16E-06	4.42E-05
FBgn0019982	Gs1l	396.1373906	-0.922911058	0.202658202	-4.55402766	5.26E-06	4.50E-05
FBgn0025335	CG4585	217.9947271	-0.608281548	0.13367762	-4.550361901	5.36E-06	4.58E-05
FBgn0015222	Fer1HCH	5978.39044	-0.640520286	0.140872294	-4.546815178	5.45E-06	4.65E-05
FBgn0000479	dnc	509.5608673	1.131013496	0.24888896	4.544249358	5.51E-06	4.70E-05
FBgn0029826	CG6041	460.4564831	-0.870381585	0.191616339	-4.542314036	5.56E-06	4.74E-05
FBgn0025680	cry	191.3683056	-0.771072657	0.169887623	-4.538721802	5.66E-06	4.82E-05
FBgn0004057	Zw	215.2901669	-0.762617193	0.168034843	-4.538446783	5.67E-06	4.82E-05
FBgn0036695	Papst2	39.34046205	-0.936547345	0.206454597	-4.536335632	5.72E-06	4.86E-05
FBgn0051265	CG31265	805.1320098	-0.686201664	0.151370996	-4.533244017	5.81E-06	4.93E-05
FBgn0030435	CG4645	254.1028383	-0.493909171	0.108977087	-4.532229505	5.84E-06	4.95E-05
FBgn0047114	CG31142	73.0930137	-0.817246515	0.180326627	-4.532034612	5.84E-06	4.95E-05
FBgn0266418	wake	54.24585827	0.817565983	0.18041221	4.531655503	5.85E-06	4.95E-05
FBgn0034141	CG8311	219.5708909	-0.705396016	0.15567899	-4.53109323	5.87E-06	4.96E-05
FBgn0003209	raw	63.91141332	1.181487227	0.260798204	4.530273629	5.89E-06	4.98E-05
FBgn0262475	bru-2	139.0942869	1.149092571	0.253673817	4.529803607	5.90E-06	4.98E-05
FBgn0250789	alpha-Spec	448.1633002	0.629045154	0.138951424	4.527086789	5.98E-06	5.04E-05
FBgn0003053	peb	603.234673	0.425022813	0.093909358	4.525883476	6.01E-06	5.07E-05
FBgn0003044	Pcl	32.25024152	0.993265812	0.219524698	4.52461987	6.05E-06	5.09E-05
FBgn0250823	gish	227.4177274	1.333021584	0.294610146	4.524696799	6.05E-06	5.09E-05
FBgn0020545	kraken	534.4782591	-0.806952937	0.178397635	-4.523338755	6.09E-06	5.11E-05
FBgn0036896	wnd	136.9746482	1.236163495	0.273304939	4.523019236	6.10E-06	5.12E-05
FBgn0030733	UQCR-14	1482.515901	-0.685448656	0.151626344	-4.520643565	6.17E-06	5.17E-05
FBgn0039778	Jon99Fi	3592.76434	-0.969156694	0.214496019	-4.518296873	6.23E-06	5.22E-05
FBgn0050371	CG30371	9.28940159	3.245578453	0.718330501	4.518224475	6.24E-06	5.22E-05
FBgn0019952	Orct	44.97837443	-1.072519193	0.237396327	-4.517842403	6.25E-06	5.22E-05
FBgn0023083	fray	78.13983301	1.404050495	0.310892023	4.516199809	6.30E-06	5.26E-05
FBgn0035431	CG14968	540.2095	-0.786396933	0.174237596	-4.51335963	6.38E-06	5.32E-05
FBgn0263852	l(2)k12914	206.1193006	-0.636778549	0.141090439	-4.513265078	6.38E-06	5.32E-05
FBgn0038586	CG7168	33.45644132	-1.117041	0.247621415	-4.511083987	6.45E-06	5.37E-05
FBgn0004868	Gdi	1265.420727	-0.687252419	0.152379592	-4.510134258	6.48E-06	5.39E-05
FBgn0031099	CG17065	133.2972493	-0.666845961	0.147857916	-4.510045704	6.48E-06	5.39E-05
FBgn0261260	mgl	54.41311259	1.211564818	0.268718519	4.508676305	6.52E-06	5.42E-05
FBgn0033897	Rcd1	48.67959012	1.127777766	0.250247045	4.506657667	6.59E-06	5.46E-05
FBgn0010409	RpL18A	2603.324319	0.783813972	0.173932178	4.506434522	6.59E-06	5.46E-05
FBgn0042138	CG18815	451.4315226	-0.664103118	0.147496653	-4.502496196	6.72E-06	5.56E-05
FBgn0037140	CG7442	98.06343122	-0.74289544	0.165039684	-4.501313986	6.75E-06	5.59E-05
FBgn0030873	CG15814	365.5266472	-0.449942568	0.099966536	-4.500931856	6.77E-06	5.59E-05
FBgn0035044	CG3663	234.4356019	-0.737690404	0.163946208	-4.499588086	6.81E-06	5.62E-05
FBgn0027583	CG7601	230.767074	-0.81455094	0.181046633	-4.499122273	6.82E-06	5.63E-05
FBgn0028691	Rpn9	262.2929884	-0.563700384	0.125332485	-4.49763991	6.87E-06	5.66E-05
FBgn0031791	AANATL2	114.824234	-0.906982512	0.201809214	-4.49425719	6.98E-06	5.75E-05
FBgn0020626	Osbp	90.63080763	-0.74101349	0.164907287	-4.493515728	7.01E-06	5.76E-05
FBgn0250868	CG42239	651.4760606	-0.803544713	0.178862483	-4.49252799	7.04E-06	5.79E-05
FBgn0262117	IntS3	44.58172314	0.92374513	0.205645388	4.491932139	7.06E-06	5.80E-05
FBgn0016685	Nlp	294.0966408	0.641813021	0.142891341	4.491615904	7.07E-06	5.80E-05
FBgn0264001	bru-3	38.65202461	1.214601773	0.270483272	4.49048758	7.11E-06	5.82E-05
FBgn0039081	Irk2	56.78957357	-0.915082375	0.203802085	-4.490054039	7.12E-06	5.83E-05
FBgn0011206	bol	35.87414917	1.358480265	0.302592943	4.489464468	7.14E-06	5.84E-05
FBgn0040752	Prosap	313.8600966	0.936977834	0.208739189	4.488749028	7.16E-06	5.86E-05
FBgn0037363	Atg17	123.4144024	0.895874294	0.199631476	4.487640487	7.20E-06	5.88E-05
FBgn0023214	edl	31.75168856	1.346276601	0.300167736	4.48508097	7.29E-06	5.95E-05
FBgn0021872	Xbp1	799.378372	-0.728740674	0.162521871	-4.483954499	7.33E-06	5.97E-05
FBgn0243516	Vrp1	42.9886964	1.191796661	0.266009768	4.480274054	7.45E-06	6.07E-05
FBgn0032006	Pvr	70.32353045	0.800390209	0.178726811	4.478288428	7.52E-06	6.12E-05
FBgn0040687	CG14645	81735.53387	-0.947498477	0.211793584	-4.473688292	7.69E-06	6.25E-05
FBgn0038947	Sar1	1183.911195	-0.708258685	0.158404054	-4.471215646	7.78E-06	6.32E-05
FBgn0033902	Tango7	595.0734458	0.778270807	0.174085046	4.470635629	7.80E-06	6.33E-05
FBgn0000057	adp	29.50616688	-0.972954031	0.217774009	-4.467723367	7.91E-06	6.40E-05
FBgn0030645	CG6308	68.33605263	-0.911074348	0.203918021	-4.467846171	7.90E-06	6.40E-05
FBgn0038700	CG3734	1725.187202	-0.748890125	0.167636373	-4.467348664	7.92E-06	6.41E-05
FBgn0011747	Ank	62.89483695	1.379874165	0.308984519	4.46583593	7.98E-06	6.44E-05
FBgn0032729	CG10639	109.9966971	-0.76630486	0.1715944	-4.465791773	7.98E-06	6.44E-05
FBgn0034002	CG8079	32.36768484	1.022629388	0.229008024	4.465474048	7.99E-06	6.45E-05
FBgn0010391	Gtp-bp	538.1889023	-0.898027969	0.201131353	-4.464883042	8.01E-06	6.46E-05
FBgn0014865	Mtk	18.83181287	2.453038384	0.549739948	4.462179605	8.11E-06	6.54E-05
FBgn0039182	CG5728	39.65047824	1.131660795	0.253760461	4.459563135	8.21E-06	6.61E-05
FBgn0263102	psq	311.4246133	1.13312035	0.254092617	4.459477661	8.22E-06	6.61E-05
FBgn0000259	CkIIbeta	174.0444194	0.752062543	0.168721928	4.457408423	8.30E-06	6.65E-05
FBgn0013680	mt:ND2	225.4756361	-1.636347717	0.367105611	-4.457430421	8.29E-06	6.65E-05
FBgn0033021	CG10417	51.96155372	0.877651229	0.196898053	4.457389066	8.30E-06	6.65E-05
FBgn0036004	Jarid2	161.9215499	1.105615952	0.248047579	4.457273699	8.30E-06	6.65E-05
FBgn0051198	CG31198	11407.64399	-0.500765698	0.112358368	-4.456861621	8.32E-06	6.66E-05
FBgn0040754	CG17059	203.6603412	-0.747671595	0.167774417	-4.456410035	8.33E-06	6.66E-05
FBgn0263916	Ent2	246.9979796	-0.639257865	0.14344533	-4.456456436	8.33E-06	6.66E-05
FBgn0034296	CG10912	1249.590439	0.933962469	0.209591186	4.4561152	8.35E-06	6.66E-05
FBgn0035370	Non2	157.6885444	-0.57577981	0.129281589	-4.453687594	8.44E-06	6.73E-05
FBgn0016756	Usp47	231.3471534	0.682868066	0.1534537	4.449994136	8.59E-06	6.84E-05
FBgn0035827	Srp9	214.525832	-0.698727524	0.157040884	-4.449335137	8.61E-06	6.85E-05
FBgn0039454	CG14247	59.96411268	1.190253354	0.267511436	4.449355035	8.61E-06	6.85E-05
FBgn0030486	Set2	31.51795502	1.150711854	0.258645737	4.448988287	8.63E-06	6.86E-05
FBgn0011202	dia	233.4552433	0.71359038	0.160414648	4.448411592	8.65E-06	6.87E-05
FBgn0261444	CG3638	72.99955935	0.836371924	0.188079846	4.446898171	8.71E-06	6.91E-05
FBgn0039858	CycG	2353.924318	0.680718484	0.153110896	4.445917966	8.75E-06	6.94E-05
FBgn0015623	Cpr	879.502268	-0.745325869	0.167673206	-4.445110135	8.78E-06	6.96E-05
FBgn0262508	CG43078	105.5736603	0.890510931	0.200375624	4.444207897	8.82E-06	6.98E-05
FBgn0032264	Lip4	17.10000633	1.606977167	0.361620967	4.443816358	8.84E-06	6.99E-05
FBgn0086656	shrb	179.6196427	1.075182032	0.242049296	4.441996117	8.91E-06	7.04E-05
FBgn0261975	CG42806	121.4247687	-0.643031405	0.144853847	-4.439173831	9.03E-06	7.13E-05
FBgn0032407	Pex19	628.4096938	-0.970631395	0.218767777	-4.436811521	9.13E-06	7.19E-05
FBgn0039045	CG17119	384.3824536	-0.814459757	0.183560811	-4.437002389	9.12E-06	7.19E-05
FBgn0041191	Rheb	259.8644507	0.478456331	0.107895368	4.434447388	9.23E-06	7.26E-05
FBgn0260003	Dys	87.46829693	1.008486578	0.227459141	4.433704335	9.26E-06	7.28E-05
FBgn0037378	CG2046	103.5699656	-0.981420321	0.221405167	-4.43268933	9.31E-06	7.31E-05
FBgn0043470	lambdaTry	4405.049933	-1.040059452	0.234652833	-4.432332816	9.32E-06	7.32E-05
FBgn0052250	PMP34	132.5965066	-1.023630177	0.230967207	-4.431928626	9.34E-06	7.32E-05
FBgn0052068	Adi1	818.4112649	-0.480365364	0.108405047	-4.43120849	9.37E-06	7.34E-05
FBgn0035665	Jon65Aiii	56298.10885	-0.871449788	0.196807011	-4.427940766	9.51E-06	7.45E-05
FBgn0029854	CG3566	370.7454145	-1.214448764	0.274301107	-4.42742932	9.54E-06	7.46E-05
FBgn0025839	ND-B14.5A	1201.980476	-1.623359058	0.366868237	-4.424910344	9.65E-06	7.54E-05
FBgn0026086	Adar	22.94641299	1.258064434	0.284451045	4.422780145	9.74E-06	7.60E-05
FBgn0026324	Taf10b	78.05332809	-0.875128563	0.197872306	-4.422693498	9.75E-06	7.60E-05
FBgn0051211	CG31211	27.98581585	1.17423478	0.265770805	4.418223356	9.95E-06	7.76E-05
FBgn0038701	CG18493	8112.64322	-0.877055134	0.198554771	-4.417194959	1.00E-05	7.79E-05
FBgn0033720	CG13160	20.43129884	-1.390866366	0.314920518	-4.416563181	1.00E-05	7.80E-05
FBgn0010611	Hmgs	136.9097117	-0.587999458	0.133149094	-4.41609809	1.00E-05	7.81E-05
FBgn0051739	AspRS-m	47.65918382	0.997502322	0.225954557	4.41461476	1.01E-05	7.86E-05
FBgn0019624	COX5A	3289.984914	-1.241756797	0.281636656	-4.409073785	1.04E-05	8.06E-05
FBgn0024846	p38b	245.7022829	-0.652872418	0.148164181	-4.406411953	1.05E-05	8.15E-05
FBgn0030271	CG15202	41.60425794	2.626990932	0.59629355	4.405533034	1.06E-05	8.17E-05
FBgn0034877	levy	3264.592053	-1.085663089	0.246563432	-4.403179659	1.07E-05	8.26E-05
FBgn0250788	beta-Spec	217.7364084	0.633484469	0.143876869	4.402962575	1.07E-05	8.26E-05
FBgn0044511	mRpS21	126.7180442	-0.935888033	0.212589511	-4.402324589	1.07E-05	8.27E-05
FBgn0031968	CG7231	1049.801805	-0.628574694	0.142792153	-4.402025478	1.07E-05	8.28E-05
FBgn0038857	Bdbt	80.13045755	-0.885984081	0.201311725	-4.401055527	1.08E-05	8.30E-05
FBgn0039758	CG9737	4.862611648	-3.579246378	0.813238132	-4.401227926	1.08E-05	8.30E-05
FBgn0041203	LIMK1	37.88725327	0.946761361	0.215187372	4.399706871	1.08E-05	8.34E-05
FBgn0260658	CG42541	24.00305162	1.074800427	0.244315659	4.399228569	1.09E-05	8.36E-05
FBgn0024958	Irp-1A	207.2252424	-0.681869357	0.155031064	-4.398275673	1.09E-05	8.39E-05
FBgn0034971	CG3209	1053.571581	-0.688135299	0.15646505	-4.398012837	1.09E-05	8.39E-05
FBgn0011361	ND-ACP	1247.303295	-0.866874583	0.197126311	-4.397558996	1.09E-05	8.40E-05
FBgn0031992	CG8498	229.7097597	-1.017110945	0.23144666	-4.394580355	1.11E-05	8.51E-05
FBgn0259139	glo	54.66121624	0.85801234	0.195327904	4.392676737	1.12E-05	8.57E-05
FBgn0264386	Ca-alpha1T	14.66776407	1.475679085	0.335960019	4.392424693	1.12E-05	8.58E-05
FBgn0010452	trn	21.16594448	1.394360459	0.31752736	4.39130807	1.13E-05	8.61E-05
FBgn0262146	MtnE	1197.345164	-0.903538372	0.205855052	-4.389196981	1.14E-05	8.69E-05
FBgn0029176	Ef1gamma	1955.018429	0.475969675	0.108486176	4.387376284	1.15E-05	8.76E-05
FBgn0011708	Syx5	148.5074555	-0.512178628	0.116747888	-4.387048347	1.15E-05	8.76E-05
FBgn0082582	tmod	20.98470968	1.561400904	0.356027652	4.385616941	1.16E-05	8.81E-05
FBgn0000307	chif	34.23474559	1.161340113	0.264995404	4.382491522	1.17E-05	8.93E-05
FBgn0030309	CG1572	404.5679969	0.70272774	0.160380764	4.381621095	1.18E-05	8.96E-05
FBgn0031374	Wdr62	401.5142374	0.873269145	0.199317342	4.381300364	1.18E-05	8.96E-05
FBgn0263077	CG43340	99.30140067	0.703634919	0.160594453	4.381439739	1.18E-05	8.96E-05
FBgn0033302	Cyp6a14	558.1475201	-1.206211081	0.275412493	-4.379652749	1.19E-05	9.01E-05
FBgn0085427	CG34398	14.28275479	1.544528271	0.35264512	4.379837355	1.19E-05	9.01E-05
FBgn0025628	CG4199	420.1883484	-0.435817883	0.099581639	-4.376488371	1.21E-05	9.13E-05
FBgn0086906	sls	404.6874371	1.603458657	0.366522942	4.374783881	1.22E-05	9.20E-05
FBgn0030289	GCS1	95.59548163	-0.641919239	0.146741022	-4.374504364	1.22E-05	9.20E-05
FBgn0031713	CG7277	263.2881721	-0.877754465	0.200683257	-4.373830079	1.22E-05	9.22E-05
FBgn0263873	sick	42.27830523	0.823332596	0.18829491	4.372569581	1.23E-05	9.27E-05
FBgn0019644	ATPsynB	1729.282723	-1.008265836	0.230610752	-4.372154487	1.23E-05	9.28E-05
FBgn0036662	CG9706	164.9815343	-0.758275709	0.173456657	-4.371557255	1.23E-05	9.30E-05
FBgn0024814	Clc	421.7399299	-0.542365125	0.12410692	-4.370144117	1.24E-05	9.35E-05
FBgn0025692	CG3814	906.9248948	-0.714498605	0.163550929	-4.368661234	1.25E-05	9.40E-05
FBgn0264296	CG43774	1354.082558	-1.000133736	0.22897525	-4.367868289	1.25E-05	9.43E-05
FBgn0266282	jnj	22.75904752	1.168984299	0.267638724	4.367769662	1.26E-05	9.43E-05
FBgn0031533	CG2772	1068.218264	-0.733390649	0.167964073	-4.366354273	1.26E-05	9.48E-05
FBgn0033029	Not3	112.0063196	1.146450513	0.262749343	4.363285945	1.28E-05	9.60E-05
FBgn0032049	Bace	38093.07241	-0.56271133	0.129030332	-4.361077918	1.29E-05	9.69E-05
FBgn0039969	Fis1	1065.758422	-0.585255024	0.134223422	-4.36030475	1.30E-05	9.72E-05
FBgn0038400	CG5903	535.9891267	-0.606707988	0.139200412	-4.358521501	1.31E-05	9.79E-05
FBgn0014857	His3.3A	1080.100795	-0.462444025	0.106207201	-4.354168279	1.34E-05	9.97E-05
FBgn0021967	ND-PDSW	1542.701768	-0.742417535	0.170508334	-4.354142209	1.34E-05	9.97E-05
FBgn0033978	Cyp6a23	2120.545518	-1.139086588	0.261648871	-4.353493225	1.34E-05	9.99E-05
FBgn0259221	CG42321	40.11425299	0.917797121	0.211029251	4.34914647	1.37E-05	0.000101852
FBgn0032120	CG33298	136.6710917	1.060106477	0.243929778	4.345949417	1.39E-05	0.00010326
FBgn0086687	Desat1	849.7315174	-0.596326784	0.137372223	-4.340956053	1.42E-05	0.000105546
FBgn0000319	Chc	188.2461018	0.66556256	0.15337228	4.339523161	1.43E-05	0.000106084
FBgn0003415	skd	146.6566159	0.887310299	0.204482954	4.339287378	1.43E-05	0.000106084
FBgn0036134	FoxK	18.67287307	1.510300149	0.348042342	4.339414965	1.43E-05	0.000106084
FBgn0052016	4E-T	32.30807558	1.376358841	0.31724982	4.338407003	1.44E-05	0.00010642
FBgn0085220	CG34191	239.7548583	-0.480634297	0.110851891	-4.33582406	1.45E-05	0.000107588
FBgn0014343	mirr	28.01613537	1.339185287	0.308957926	4.334523158	1.46E-05	0.000108136
FBgn0039306	RIOK2	112.2681695	0.697938723	0.161108057	4.332115573	1.48E-05	0.000109234
FBgn0011824	CG4038	857.9225888	0.675634145	0.15600365	4.330886776	1.49E-05	0.000109754
FBgn0029167	Hml	7.532598076	2.639848043	0.609881376	4.328461482	1.50E-05	0.000110877
FBgn0029887	CG3198	120.242785	0.762208402	0.176212239	4.325513409	1.52E-05	0.000112183
FBgn0033438	Mmp2	16.73179158	1.896147669	0.438346502	4.325682216	1.52E-05	0.000112183
FBgn0039126	CG13601	89.53938582	-0.653435504	0.151096223	-4.32463162	1.53E-05	0.000112539
FBgn0011554	etaTry	598.8282438	-0.657154632	0.151981289	-4.323917991	1.53E-05	0.00011281
FBgn0029093	cathD	962.7881965	-0.702015633	0.162375572	-4.323406685	1.54E-05	0.000112978
FBgn0036929	CG7668	296.6876459	-0.553170925	0.127996376	-4.321770206	1.55E-05	0.000113725
FBgn0013697	mt:tRNA:Lys-CTT	143.3341135	-1.484760139	0.343577094	-4.32147592	1.55E-05	0.000113783
FBgn0036819	Dysb	13.37066526	-1.344167926	0.311149792	-4.320002652	1.56E-05	0.00011445
FBgn0031759	lid	137.5954472	0.883487101	0.2045264	4.319672682	1.56E-05	0.000114527
FBgn0263930	dally	1044.697563	0.748755711	0.173457905	4.316642181	1.58E-05	0.000116014
FBgn0038742	Arc42	72.06248342	-0.672493353	0.155824473	-4.315710751	1.59E-05	0.000116408
FBgn0051183	CG31183	37.74752985	1.304369022	0.302306417	4.314724885	1.60E-05	0.000116832
FBgn0036258	CG5642	134.1088996	0.738382456	0.171243095	4.311896243	1.62E-05	0.000118239
FBgn0002632	E(spl)m6-BFM	5.079465093	-3.139921878	0.728341307	-4.311058358	1.62E-05	0.000118591
FBgn0031002	CG14196	105.0845257	-0.827795648	0.192233337	-4.306202364	1.66E-05	0.000121123
FBgn0003278	RpI135	28.04500741	1.109677095	0.25770666	4.305969799	1.66E-05	0.000121151
FBgn0036448	mop	55.72870762	0.942134982	0.218890665	4.304135038	1.68E-05	0.000122059
FBgn0031698	Ncoa6	221.1722885	0.938546807	0.218118666	4.302918327	1.69E-05	0.00012263
FBgn0031661	Gmd	314.93408	-0.656048869	0.152509078	-4.301703713	1.69E-05	0.000123203
FBgn0033557	CG12325	11.66822719	1.822540073	0.423740877	4.30107212	1.70E-05	0.000123454
FBgn0042178	CG32165	16.19075507	1.48449394	0.345357374	4.298428384	1.72E-05	0.000124833
FBgn0031600	CG3652	129.8794813	-0.63022692	0.146626252	-4.298186097	1.72E-05	0.000124867
FBgn0020388	Gcn5	73.15246446	-0.790888519	0.184104823	-4.295859868	1.74E-05	0.000126081
FBgn0052133	Ptip	7.405750027	2.084621283	0.485411293	4.29454632	1.75E-05	0.000126726
FBgn0030984	tgy	129.1498724	-0.622139682	0.144888914	-4.293908103	1.76E-05	0.000126987
FBgn0035422	RpL28	7707.71339	0.570515923	0.132878325	4.293521327	1.76E-05	0.000127105
FBgn0039450	CG5484	145.8654472	-0.534052701	0.1244011	-4.29299017	1.76E-05	0.000127306
FBgn0037298	CG2604	229.0793545	-0.941275434	0.219296594	-4.292248305	1.77E-05	0.000127628
FBgn0036232	CG14125	3811.245823	0.983122334	0.229086636	4.291487055	1.77E-05	0.000127962
FBgn0026076	UBL3	121.4882416	0.841108071	0.196010279	4.291142669	1.78E-05	0.000128057
FBgn0035619	CG10592	2611.939573	-0.788635697	0.183881197	-4.288832743	1.80E-05	0.00012929
FBgn0037469	Dpck	178.9749081	-0.756430131	0.176384501	-4.288529471	1.80E-05	0.000129362
FBgn0015795	Rab7	312.2949706	0.63776452	0.148734794	4.287930911	1.80E-05	0.000129606
FBgn0050349	CG30349	49.24414136	0.776754382	0.181189305	4.286976993	1.81E-05	0.000130024
FBgn0053977	CG33977	313.5463847	-1.081766397	0.252344982	-4.286855197	1.81E-05	0.000130024
FBgn0038652	CG7720	685.5401313	0.708602071	0.165320393	4.286235106	1.82E-05	0.000130282
FBgn0035334	CG8993	558.4698887	-1.137134128	0.26531197	-4.28602648	1.82E-05	0.000130298
FBgn0037012	Rcd2	143.0602708	0.975452916	0.227666255	4.284573997	1.83E-05	0.000130941
FBgn0051549	CG31549	248.2849091	-1.094784897	0.255509605	-4.284711326	1.83E-05	0.000130941
FBgn0037612	CG8112	91.42492016	1.01306878	0.23664358	4.280989925	1.86E-05	0.000132961
FBgn0051510	CG31510	9.222662995	1.966975013	0.459512257	4.280571378	1.86E-05	0.000133104
FBgn0032222	CG5037	144.1481139	-0.658113295	0.153827247	-4.278262192	1.88E-05	0.000134383
FBgn0044826	Pak3	424.0866245	0.621945625	0.145419574	4.27690447	1.90E-05	0.000135096
FBgn0260856	Membrin	106.1665521	-0.657108846	0.153648334	-4.276706601	1.90E-05	0.000135108
FBgn0020764	Alas	274.881598	-1.064569974	0.248947593	-4.276281451	1.90E-05	0.000135257
FBgn0034761	CG4250	23.56921271	1.524282524	0.356615047	4.274307933	1.92E-05	0.000136351
FBgn0263832	Rcd5	36.22848697	0.954331555	0.223340377	4.272991592	1.93E-05	0.000136939
FBgn0263979	Caf1-55	30.74008596	1.191576491	0.278854846	4.273106624	1.93E-05	0.000136939
FBgn0086605	CG9853	191.0754906	-0.55400737	0.129781906	-4.268756633	1.97E-05	0.000139453
FBgn0038916	dnd	422.8116496	-0.763503434	0.178886714	-4.268083505	1.97E-05	0.000139762
FBgn0033194	Vps13	50.54212613	1.276512584	0.299297162	4.265034038	2.00E-05	0.000141526
FBgn0263198	Acn	44.12820387	0.959492135	0.22497268	4.264927342	2.00E-05	0.000141526
FBgn0035934	TrpA1	68.68110081	-1.119115749	0.262541662	-4.262621554	2.02E-05	0.000142881
FBgn0016930	Dyrk2	26.54790347	1.087621358	0.255289718	4.260341417	2.04E-05	0.000144231
FBgn0030092	fh	30.45197746	-0.923684069	0.216856888	-4.259417702	2.05E-05	0.000144713
FBgn0015576	alpha-Est8	107.6890189	0.888031048	0.208555763	4.258002932	2.06E-05	0.0001454
FBgn0264294	Cyt-b5	2490.329717	-1.179418667	0.276982784	-4.258093776	2.06E-05	0.0001454
FBgn0025640	CG13369	146.9973493	-0.921628697	0.216525907	-4.256436149	2.08E-05	0.000146306
FBgn0003076	Pgm	53.66597069	-1.010673657	0.237546582	-4.254633545	2.09E-05	0.000147372
FBgn0086558	Ubi-p5E	1272.140303	0.616155488	0.14483095	4.254308135	2.10E-05	0.00014747
FBgn0001078	ftz-f1	82.14849769	1.098361754	0.25822255	4.253547003	2.10E-05	0.000147855
FBgn0031951	r2d2	59.57599268	-0.757599008	0.178316801	-4.2486126	2.15E-05	0.000151029
FBgn0053111	CG33111	35.64692639	1.272714834	0.299737485	4.246098329	2.18E-05	0.000152612
FBgn0029976	snz	30.79064398	0.913122009	0.215167932	4.243764386	2.20E-05	0.000154087
FBgn0015781	P5cr	104.2379734	-0.919443563	0.216741656	-4.242117466	2.21E-05	0.0001551
FBgn0037637	IscU	1656.880207	-0.678935051	0.160201987	-4.237993931	2.26E-05	0.00015785
FBgn0031530	pgant2	68.38291924	0.669916362	0.158098817	4.237326834	2.26E-05	0.000158195
FBgn0267487	Ptp61F	161.122776	0.871461035	0.205727377	4.235999343	2.28E-05	0.000159007
FBgn0033844	bbc	280.5231039	-0.512952293	0.121172209	-4.233250329	2.30E-05	0.000160837
FBgn0037011	CG4858	149.5459621	-0.94071913	0.222255998	-4.232592769	2.31E-05	0.000161181
FBgn0036623	CG4729	644.6873287	-0.636460857	0.150391217	-4.23203476	2.32E-05	0.000161455
FBgn0034031	CG12963	1195.709583	-0.621410362	0.146881016	-4.230705776	2.33E-05	0.000162284
FBgn0039930	CG11077	94.05949253	-0.735691222	0.174073378	-4.226328181	2.38E-05	0.000165342
FBgn0027335	Rip11	352.1503173	0.432465156	0.102331449	4.22612167	2.38E-05	0.000165364
FBgn0263352	Unr	618.352419	0.534148751	0.126495247	4.22267844	2.41E-05	0.000167779
FBgn0003963	ush	7.090022805	2.176102218	0.515430482	4.221912153	2.42E-05	0.000168087
FBgn0034291	CG5770	162.7077864	0.76269848	0.180645791	4.222066151	2.42E-05	0.000168087
FBgn0029833	MCTS1	137.3256653	-0.728728646	0.172730468	-4.218877286	2.46E-05	0.000170099
FBgn0039015	Takl2	107.3884958	-0.749745652	0.177709095	-4.218949235	2.45E-05	0.000170099
FBgn0034160	CG5550	419.5103546	0.873301636	0.207115259	4.216500702	2.48E-05	0.000171767
FBgn0001941	ifc	1947.050459	-0.893395732	0.211907876	-4.215962843	2.49E-05	0.000172042
FBgn0265174	PIG-V	92.69296132	0.583085642	0.13835226	4.214500301	2.50E-05	0.000173026
FBgn0015949	hrg	151.3041921	0.739202769	0.175437321	4.21348641	2.51E-05	0.000173669
FBgn0037975	CG3397	15.53743615	-2.154107845	0.511568816	-4.210788024	2.54E-05	0.00017562
FBgn0036918	CG7770	183.5712892	-0.961914067	0.228467528	-4.210287892	2.55E-05	0.000175872
FBgn0031865	Nha1	276.6552668	-0.483852165	0.114941488	-4.209551939	2.56E-05	0.000176309
FBgn0030883	CG7772	62.93195679	-0.810848253	0.192631567	-4.209321792	2.56E-05	0.000176351
FBgn0083983	mRpL34	176.1685628	-0.8365204	0.198738944	-4.209141816	2.56E-05	0.000176355
FBgn0260936	scny	180.1122367	0.53245391	0.126540346	4.207779792	2.58E-05	0.000177283
FBgn0015569	alpha-Est10	48.70382555	-1.175438404	0.279405778	-4.206922318	2.59E-05	0.000177819
FBgn0034071	CG8405	168.6251276	0.655383906	0.155909954	4.203605283	2.63E-05	0.000180167
FBgn0037989	ATP8B	21.35276363	1.460674309	0.347474097	4.203692651	2.63E-05	0.000180167
FBgn0036759	CG5577	406.7323882	-0.930629098	0.221405432	-4.203280322	2.63E-05	0.000180286
FBgn0022986	qkr58E-1	14.48532873	1.376467197	0.327541418	4.2024218	2.64E-05	0.000180832
FBgn0038532	CG14322	14.62273701	1.557473295	0.370742358	4.20095859	2.66E-05	0.000181864
FBgn0023213	eIF4G	928.719346	1.050852272	0.250164755	4.200640778	2.66E-05	0.000181979
FBgn0015544	spag	10.02738501	1.789179939	0.425957366	4.20037328	2.66E-05	0.000182054
FBgn0034576	ND-B14.7	1511.781162	-1.127059699	0.268346847	-4.200010956	2.67E-05	0.000182205
FBgn0024196	robl	361.0532056	-1.127714887	0.26859869	-4.198512237	2.69E-05	0.000183274
FBgn0031258	CG4297	29.66593183	1.083170788	0.25804906	4.197538199	2.70E-05	0.000183922
FBgn0033883	CG16935	245.7479246	-0.679198398	0.161872465	-4.195885932	2.72E-05	0.000185125
FBgn0035335	mRpL23	127.8113651	-0.607887772	0.14489198	-4.195454935	2.72E-05	0.000185335
FBgn0035541	CG15019	266.8287104	0.570502709	0.136031583	4.193898917	2.74E-05	0.000186469
FBgn0037182	ArfGAP3	197.5677878	-0.490565274	0.117009245	-4.192534311	2.76E-05	0.00018745
FBgn0035020	CG13585	446.5221377	-1.006582528	0.240237227	-4.189952318	2.79E-05	0.000189451
FBgn0035631	Txl	218.6159064	-0.591216708	0.141129593	-4.189176029	2.80E-05	0.000189955
FBgn0265595	CG44422	33.72028239	1.090949523	0.260572481	4.186741131	2.83E-05	0.000191856
FBgn0028692	Rpn2	460.0821402	-0.472353317	0.112859984	-4.185303778	2.85E-05	0.000192927
FBgn0004865	Eip78C	10.11625782	1.71172073	0.40941842	4.180859104	2.90E-05	0.000196587
FBgn0086690	Plp	16.77793409	1.537670321	0.368139875	4.176864356	2.96E-05	0.000199917
FBgn0000723	FER	269.0043478	0.57603225	0.137933502	4.176159099	2.96E-05	0.000200385
FBgn0041630	Hexo1	941.6697655	-0.462918216	0.11086419	-4.175543226	2.97E-05	0.000200774
FBgn0032633	Lrch	54.83423081	1.005725122	0.240909014	4.174709385	2.98E-05	0.000201301
FBgn0052633	CG32633	4635.322749	-0.84271434	0.201867052	-4.174600709	2.99E-05	0.000201301
FBgn0035904	GstO3	479.4065567	-0.527964347	0.126525889	-4.172777208	3.01E-05	0.000202611
FBgn0038034	Cyp9f3Psi	63.4840189	-0.721963504	0.173011402	-4.172924413	3.01E-05	0.000202611
FBgn0033761	CG8778	99.0308792	-0.760949263	0.182438769	-4.170984413	3.03E-05	0.000204056
FBgn0264915	CR44106	61.38995138	0.788506293	0.189145361	4.16878473	3.06E-05	0.000205879
FBgn0052344	CG32344	78.60992641	0.639345705	0.153499838	4.165122986	3.11E-05	0.000209053
FBgn0004919	gol	19.06573046	1.161529971	0.279022763	4.162850218	3.14E-05	0.000210985
FBgn0040011	Slmap	24.41970465	1.231647951	0.296124551	4.159222693	3.19E-05	0.000214202
FBgn0011771	Hem	18.03829565	1.431190123	0.344154672	4.158566597	3.20E-05	0.000214655
FBgn0010265	RpS13	6682.971938	0.437016685	0.105094422	4.15832428	3.21E-05	0.000214721
FBgn0033215	CG1942	124.9095666	-1.052395019	0.253211912	-4.156182906	3.24E-05	0.000216578
FBgn0030366	Usp7	358.3022202	0.646791877	0.155638388	4.155734865	3.24E-05	0.000216839
FBgn0262167	ana1	5.805624177	2.427084748	0.584084485	4.155365893	3.25E-05	0.000217026
FBgn0036844	Mkp3	107.1875891	0.676704189	0.162905711	4.153962338	3.27E-05	0.000218198
FBgn0038862	Usp8	40.85814476	0.805260114	0.193891537	4.153147292	3.28E-05	0.000218812
FBgn0039326	CG10562	368.8039834	-0.716452416	0.172641791	-4.14993618	3.33E-05	0.000221737
FBgn0261823	Asx	17.85479587	1.27847001	0.308233631	4.147730431	3.36E-05	0.000223715
FBgn0261436	DhpD	203.2709745	-0.908333829	0.219051008	-4.146677243	3.37E-05	0.000224577
FBgn0050502	fa2h	193.650527	0.613624853	0.148043417	4.144897949	3.40E-05	0.000225989
FBgn0261938	mtRNApol	21.56987818	1.314595679	0.317158496	4.144917113	3.40E-05	0.000225989
FBgn0033483	egr	23.89063206	1.171487122	0.282824453	4.14209984	3.44E-05	0.000228593
FBgn0041184	Socs36E	265.6202656	0.930509108	0.224660702	4.141841892	3.45E-05	0.000228679
FBgn0037001	ND-39	3431.295457	-1.090963515	0.263511126	-4.140104178	3.47E-05	0.000230245
FBgn0026179	siz	49.42896654	0.967546836	0.233776551	4.138767699	3.49E-05	0.000231417
FBgn0001297	kay	283.2881617	0.754407014	0.182365779	4.136779489	3.52E-05	0.000233256
FBgn0039476	CG6271	43.74109427	-1.939035899	0.468876602	-4.135492987	3.54E-05	0.000234392
FBgn0039674	CG1907	365.7984009	-0.911742156	0.220572962	-4.1335173	3.57E-05	0.00023624
FBgn0035636	Cralbp	56.64665061	-1.057989831	0.255979439	-4.133104731	3.58E-05	0.000236489
FBgn0017545	RpS3A	6213.147169	0.333767169	0.080781434	4.131731169	3.60E-05	0.000237552
FBgn0262737	mub	88.57029829	0.778406297	0.188396823	4.13173791	3.60E-05	0.000237552
FBgn0015245	Hsp60	316.910447	-0.871292937	0.210988318	-4.129579038	3.63E-05	0.000239608
FBgn0029002	miple2	139.6179196	0.629076919	0.152376005	4.12845131	3.65E-05	0.000240607
FBgn0053554	Nipped-A	72.09209826	1.085124819	0.262857491	4.128186772	3.66E-05	0.000240705
FBgn0010415	Sdc	502.5026326	0.741534699	0.179659594	4.127442808	3.67E-05	0.000241306
FBgn0016081	fry	53.86238251	1.034161587	0.250738717	4.124459108	3.72E-05	0.000244274
FBgn0038808	Srp14	513.5897116	-0.541355732	0.13127788	-4.123739138	3.73E-05	0.000244851
FBgn0266258	CR44953	6.25964211	2.261278669	0.548378336	4.123574038	3.73E-05	0.000244851
FBgn0004635	rho	46.88378234	1.46720984	0.355826992	4.123379828	3.73E-05	0.000244877
FBgn0001316	klar	702.506946	0.473722715	0.114907613	4.122639957	3.75E-05	0.000245302
FBgn0265194	Trpm	74.54596078	0.868808171	0.210736476	4.122723265	3.74E-05	0.000245302
FBgn0036362	CG10725	42.25701071	0.992133416	0.240750744	4.120998346	3.77E-05	0.000246874
FBgn0264978	Slh	431.3573064	-0.830734167	0.201669785	-4.119279281	3.80E-05	0.000248539
FBgn0004646	ogre	97.97611727	1.211979839	0.294319983	4.117898579	3.82E-05	0.000249848
FBgn0040793	CG7630	1738.787356	-0.907106835	0.220302531	-4.117550667	3.83E-05	0.000250041
FBgn0039323	CG10559	33.44576924	-1.129670726	0.274531252	-4.114907563	3.87E-05	0.000252737
FBgn0031390	tho2	45.2867006	0.748119638	0.181933309	4.112054257	3.92E-05	0.000255694
FBgn0086707	ncm	98.47018221	0.754703479	0.183542972	4.111862583	3.92E-05	0.000255718
FBgn0053180	Ranbp16	59.45559525	0.728927452	0.177328286	4.110610149	3.95E-05	0.00025692
FBgn0039266	CG11791	245.922594	1.176479065	0.286279583	4.109545825	3.96E-05	0.000257918
FBgn0037535	CG14463	87.60402694	-0.791252182	0.19265359	-4.107123991	4.01E-05	0.000260445
FBgn0000253	Cam	2301.816993	1.14073359	0.278019991	4.103063187	4.08E-05	0.000264866
FBgn0024432	Dlc90F	174.9423563	-0.598295226	0.145828673	-4.102726951	4.08E-05	0.000265057
FBgn0031412	CG16995	20.94926725	-1.706557649	0.416020249	-4.102102371	4.09E-05	0.000265579
FBgn0033907	mRpS16	113.058606	-0.758085401	0.184844492	-4.101206334	4.11E-05	0.000266415
FBgn0029835	CG5921	235.2352316	-0.532958662	0.130045807	-4.098237944	4.16E-05	0.000269656
FBgn0011837	Tis11	329.1408949	0.675754623	0.164917979	4.097519427	4.18E-05	0.000270297
FBgn0004396	CrebA	231.7575206	1.415148081	0.345401317	4.097112583	4.18E-05	0.000270575
FBgn0035998	CG3437	40.91137287	-1.229518164	0.300125883	-4.096674867	4.19E-05	0.000270889
FBgn0004049	yrt	52.64533261	1.040809609	0.254283956	4.093099798	4.26E-05	0.000274901
FBgn0029783	Sirt4	50.42262458	-0.858146833	0.209779659	-4.090705624	4.30E-05	0.000277552
FBgn0011725	twin	74.38182359	0.797573426	0.195032091	4.089447131	4.32E-05	0.000278859
FBgn0035600	Cyt-c1	3555.411863	-0.819102674	0.200332651	-4.088712792	4.34E-05	0.000279539
FBgn0267691	CR46027	126.2595592	-0.975342025	0.238556318	-4.088518936	4.34E-05	0.00027957
FBgn0262738	norpA	93.68167431	0.944449829	0.231088819	4.086955968	4.37E-05	0.000281255
FBgn0035356	CG16986	1417.814089	-0.885986983	0.216900927	-4.08475424	4.41E-05	0.000283729
FBgn0017558	Pdk	204.7465573	0.80191126	0.196362481	4.083831369	4.43E-05	0.000284652
FBgn0004864	hop	19.53046112	1.085046485	0.265819437	4.08189295	4.47E-05	0.000286829
FBgn0261397	didum	69.97092027	0.887967373	0.217583721	4.081037721	4.48E-05	0.000287678
FBgn0037901	CG6744	61.27722506	-0.66478084	0.162989504	-4.078672699	4.53E-05	0.00029041
FBgn0037448	CG15186	7.098943837	2.149099366	0.527020947	4.077825328	4.55E-05	0.000291259
FBgn0040070	Trx-2	1275.764105	-0.887054861	0.217569813	-4.077104479	4.56E-05	0.000291952
FBgn0052649	CG32649	37.9295917	-0.912621583	0.22397837	-4.074596947	4.61E-05	0.000294902
FBgn0030584	CG14407	399.4901565	-1.106119174	0.271505205	-4.07402566	4.62E-05	0.000295414
FBgn0027588	GCS2alpha	415.1107744	-0.635098461	0.156034972	-4.07023151	4.70E-05	0.00030005
FBgn0031170	CG1718	179.6892131	1.000516314	0.245894797	4.068879555	4.72E-05	0.000301579
FBgn0037445	CG9727	31.04593835	1.081001799	0.265837604	4.066399115	4.77E-05	0.000304586
FBgn0038194	Cyp6d5	4537.384514	-0.990946196	0.243772974	-4.065037146	4.80E-05	0.00030615
FBgn0003612	Su(var)2-10	27.78052445	1.040627642	0.25604806	4.064188733	4.82E-05	0.000307044
FBgn0250746	Prosbeta7	844.904143	-0.752663091	0.185204052	-4.063966653	4.82E-05	0.000307116
FBgn0013576	mtd	558.6447033	0.63119005	0.15534888	4.063048614	4.84E-05	0.000308105
FBgn0000547	ed	20.40217016	1.15430567	0.284185022	4.061810376	4.87E-05	0.000309522
FBgn0036686	CG7728	71.13773047	0.642176478	0.158214803	4.058889971	4.93E-05	0.000313194
FBgn0027086	IleRS	87.04684624	0.652179551	0.160713817	4.05801792	4.95E-05	0.00031414
FBgn0030718	ND-20	777.4010877	-0.511346938	0.126044756	-4.056868006	4.97E-05	0.000315464
FBgn0036607	CG13059	10.66997964	2.189766005	0.53985517	4.056210124	4.99E-05	0.000316127
FBgn0034803	CG9849	91.05230228	-0.661792827	0.163196644	-4.055186503	5.01E-05	0.000317288
FBgn0000711	flw	287.4920887	0.560859742	0.138350396	4.053907739	5.04E-05	0.0003188
FBgn0011217	eff	1051.562049	-0.6490283	0.160140049	-4.052879364	5.06E-05	0.000319977
FBgn0034986	mRpS17	182.8640788	-0.682509572	0.168424322	-4.05232191	5.07E-05	0.000320354
FBgn0265274	Inx3	51.52654776	1.12446696	0.277490635	4.052269949	5.07E-05	0.000320354
FBgn0039209	REPTOR	181.4810926	1.1050592	0.273128154	4.045936623	5.21E-05	0.000328907
FBgn0037924	CG14712	12.53293566	1.4602966	0.36094738	4.045732655	5.22E-05	0.000328959
FBgn0010620	CG10939	59.49778101	0.900341243	0.222585963	4.044914748	5.23E-05	0.000329406
FBgn0052196	CG32196	54.96296693	-0.854764311	0.211300962	-4.045245712	5.23E-05	0.000329406
FBgn0262007	CG42825	752.8105561	0.778400255	0.192437563	4.044949656	5.23E-05	0.000329406
FBgn0036892	Lon	237.1098338	0.506429787	0.125285007	4.042221793	5.29E-05	0.000332977
FBgn0030594	CG9509	430.7921469	-0.727235985	0.179917936	-4.042042725	5.30E-05	0.000332995
FBgn0263197	Patronin	110.1107585	0.860701362	0.213018154	4.040507082	5.33E-05	0.000334946
FBgn0034925	CG5339	60.61555698	-0.867271533	0.214677809	-4.039875088	5.35E-05	0.000335611
FBgn0005624	Psc	35.13254194	0.955540015	0.23657453	4.039065468	5.37E-05	0.000336296
FBgn0041156	exex	71.84465707	1.002031009	0.248082861	4.039098087	5.37E-05	0.000336296
FBgn0261681	CG42728	16.53673709	-1.545402632	0.382771521	-4.037402329	5.40E-05	0.000338448
FBgn0033945	CG12868	135.6698921	-0.782304093	0.193780755	-4.037057725	5.41E-05	0.000338706
FBgn0032053	mRpL51	98.50858744	-1.028755407	0.254934455	-4.035372177	5.45E-05	0.000340907
FBgn0036956	CG13813	4.118652669	-2.738399587	0.678692005	-4.034819278	5.46E-05	0.000341469
FBgn0045842	yuri	18.29794243	1.536804317	0.380995526	4.033654495	5.49E-05	0.000342925
FBgn0004394	pdm2	9.138393767	1.803307242	0.447116108	4.033196767	5.50E-05	0.000343111
FBgn0263594	lost	833.8721446	-0.663468895	0.164496889	-4.033321844	5.50E-05	0.000343111
FBgn0036332	CG11261	16.63104773	1.299319852	0.32228276	4.031614507	5.54E-05	0.000345186
FBgn0032919	CG9253	117.4972426	1.348076328	0.334537587	4.029670746	5.59E-05	0.000347564
FBgn0261394	Prosalpha3	452.1525872	-0.401772432	0.099702274	-4.029721838	5.58E-05	0.000347564
FBgn0032801	CG10165	680.339914	-0.731241402	0.181556055	-4.027634345	5.63E-05	0.000350341
FBgn0034158	CG5522	30.28715425	1.059898597	0.263252853	4.026161869	5.67E-05	0.000352294
FBgn0015268	Nap1	1329.063127	0.528648222	0.131338473	4.025082745	5.70E-05	0.000353666
FBgn0033936	CG17386	8.116929601	1.906499732	0.473699408	4.024703641	5.70E-05	0.000353988
FBgn0019830	colt	465.5646751	-0.701700261	0.17439238	-4.023686468	5.73E-05	0.000355272
FBgn0038569	CG7218	91.48804426	-0.622757062	0.154798643	-4.023013697	5.75E-05	0.00035604
FBgn0013689	mt:tRNA:Ala-TGC	506.8244788	-0.903944179	0.224715805	-4.022610598	5.76E-05	0.000356401
FBgn0051229	CG31229	259.0998072	-1.08520963	0.269808859	-4.022142325	5.77E-05	0.000356861
FBgn0036419	CG13482	1802.088129	0.559115173	0.139080946	4.020070235	5.82E-05	0.000359763
FBgn0050007	CG30007	5.259853923	2.765009007	0.687911851	4.01942342	5.83E-05	0.0003605
FBgn0030060	CG2004	118.0560696	-0.920172913	0.229083442	-4.016758708	5.90E-05	0.000364345
FBgn0036173	CG7394	179.8730125	-0.841583678	0.20955655	-4.016021814	5.92E-05	0.000365231
FBgn0264491	how	34.34288658	1.14561405	0.285448713	4.013379623	5.99E-05	0.000369088
FBgn0011300	babo	101.7777802	0.969448008	0.24166809	4.011485371	6.03E-05	0.000371494
FBgn0024320	Npc1a	103.3650238	0.713858785	0.177959547	4.011354262	6.04E-05	0.000371494
FBgn0033980	Cyp6a20	116.2678123	0.656910321	0.163755185	4.011539058	6.03E-05	0.000371494
FBgn0033059	CG7845	76.80346827	0.675499929	0.168414744	4.010931059	6.05E-05	0.000371902
FBgn0034645	ND-B12	2517.867681	-1.197223498	0.298532709	-4.010359538	6.06E-05	0.000372545
FBgn0030693	CG8974	188.7543055	0.655013797	0.163352277	4.009823479	6.08E-05	0.000373133
FBgn0031493	CG3605	116.0576252	0.81327784	0.202887215	4.008521889	6.11E-05	0.000374936
FBgn0037873	SdhC	1028.157091	-0.991794054	0.247504996	-4.007167821	6.15E-05	0.00037683
FBgn0050423	CG30423	276.1915671	-1.010124583	0.252154746	-4.005970927	6.18E-05	0.00037822
FBgn0263911	COX8	1951.157041	-0.911532176	0.227542469	-4.005987013	6.18E-05	0.00037822
FBgn0038881	CG16791	211.3298119	0.73240259	0.18291095	4.004148417	6.22E-05	0.000380884
FBgn0002773	Mlc2	1216.585863	-0.769863051	0.19228586	-4.003742412	6.23E-05	0.000381275
FBgn0002914	Myb	50.77085381	0.864210515	0.215939964	4.002086961	6.28E-05	0.000383469
FBgn0038461	CG3678	129.7707475	-0.718264881	0.179473806	-4.002059663	6.28E-05	0.000383469
FBgn0035571	CG12493	23.79045028	1.200765208	0.300383568	3.997439727	6.40E-05	0.000390758
FBgn0038739	CG4686	66.82381538	-0.806055409	0.201693369	-3.996439799	6.43E-05	0.000392142
FBgn0032223	GATAd	20.65504604	1.235332387	0.309174476	3.995583348	6.45E-05	0.000393292
FBgn0030990	CG7556	177.1195426	-0.576362281	0.144411302	-3.991116152	6.58E-05	0.000400224
FBgn0053474	CG33474	9.317876901	-1.800987278	0.451246452	-3.991138926	6.58E-05	0.000400224
FBgn0052594	be	26.71741162	1.128071891	0.282721214	3.990050391	6.61E-05	0.000401751
FBgn0036824	CG3902	209.8005472	-0.717656215	0.179911698	-3.988935803	6.64E-05	0.000403366
FBgn0004647	N	35.01690783	0.908149421	0.227685266	3.988617427	6.65E-05	0.000403631
FBgn0085736	CG40472	36.3926678	-1.242880322	0.31162701	-3.988358782	6.65E-05	0.000403794
FBgn0050026	CG30026	48.64364508	0.915710961	0.229649534	3.987427907	6.68E-05	0.000405104
FBgn0032474	DnaJ-H	146.3081938	-0.6760962	0.16961114	-3.986154456	6.72E-05	0.000406798
FBgn0035771	Sec63	191.0875784	-0.57432051	0.144080354	-3.986112576	6.72E-05	0.000406798
FBgn0030061	CG1785	36.06874878	1.044033553	0.262206228	3.98172675	6.84E-05	0.000414097
FBgn0030872	Ucp4A	191.560518	-0.579228522	0.145524069	-3.980293604	6.88E-05	0.000416317
FBgn0039790	CG2246	66.89079636	0.83368045	0.209464596	3.98005422	6.89E-05	0.000416452
FBgn0263933	ebi	83.79583734	0.748349653	0.188071677	3.979066201	6.92E-05	0.000417901
FBgn0030510	CG12177	127.7592655	-0.9378328	0.235823035	-3.97684984	6.98E-05	0.000421055
FBgn0037671	VhaM8.9	1904.896795	-0.610235563	0.153449188	-3.976792381	6.99E-05	0.000421055
FBgn0267195	CR45635	3.901020837	3.621273549	0.910582005	3.976878007	6.98E-05	0.000421055
FBgn0037374	jagn	124.5004956	-0.57000801	0.143501525	-3.972139033	7.12E-05	0.000429076
FBgn0036624	RAF2	7.335668913	1.844844203	0.465242594	3.965338142	7.33E-05	0.000440896
FBgn0260794	ctrip	64.13798814	0.780168827	0.196746497	3.965350541	7.33E-05	0.000440896
FBgn0032733	CG15170	294.786857	-0.749500529	0.18907392	-3.964060873	7.37E-05	0.000442963
FBgn0039212	Syx18	52.0075704	-0.685330702	0.172913377	-3.963433671	7.39E-05	0.000443527
FBgn0261380	mRpL37	89.46398747	0.665326687	0.167862976	3.963510617	7.39E-05	0.000443527
FBgn0040634	CG4186	19.86969986	-1.299060421	0.327785734	-3.963138989	7.40E-05	0.000443774
FBgn0027844	CAH1	1361.700126	-0.431424187	0.10890449	-3.961491266	7.45E-05	0.000446546
FBgn0032728	Tango6	14.13544078	1.412526348	0.356721231	3.959748471	7.50E-05	0.000449513
FBgn0025638	Roc1a	683.0519777	-0.61937828	0.156498563	-3.957725032	7.57E-05	0.000453031
FBgn0052448	CG32448	217.6870336	-0.91525294	0.231329322	-3.956493422	7.61E-05	0.000455064
FBgn0025352	Thiolase	468.8785634	-0.480541413	0.121525778	-3.9542344	7.68E-05	0.000459075
FBgn0020235	ATPsyngamma	955.995168	-0.657210933	0.166382633	-3.949997192	7.82E-05	0.000466963
FBgn0261565	Lmpt	172.3883136	0.766844739	0.194222157	3.948286588	7.87E-05	0.000469994
FBgn0033782	sug	436.1857831	0.937226941	0.237403266	3.947826659	7.89E-05	0.000470568
FBgn0278608	Dsp1	72.68079674	0.982740856	0.248941865	3.947672109	7.89E-05	0.000470568
FBgn0086613	Ino80	21.2337585	1.217780024	0.308541067	3.946897691	7.92E-05	0.000471774
FBgn0019925	Surf4	500.5503845	-0.491242732	0.124478497	-3.94640635	7.93E-05	0.000472108
FBgn0040022	Set1	134.5743819	0.881035948	0.223249809	3.946412994	7.93E-05	0.000472108
FBgn0032261	CG6094	102.2012168	-0.932970335	0.23649616	-3.94497034	7.98E-05	0.000474628
FBgn0035947	Srp68	252.5059052	-0.581806455	0.147528045	-3.943700699	8.02E-05	0.000476829
FBgn0033204	CG2065	33.36556264	-1.506550932	0.38248364	-3.938863715	8.19E-05	0.000485892
FBgn0038950	CG5382	159.4038076	-0.806821248	0.204832683	-3.938928275	8.18E-05	0.000485892
FBgn0011768	Fdh	565.0548415	-0.799519671	0.202997265	-3.938573617	8.20E-05	0.000486154
FBgn0001197	His2Av	102.1147203	0.687415933	0.174560383	3.937983641	8.22E-05	0.000486567
FBgn0037356	CG12170	103.1505959	-1.063839921	0.270154941	-3.937888082	8.22E-05	0.000486567
FBgn0051815	CG31815	4.677638392	3.08333966	0.78296528	3.938028596	8.22E-05	0.000486567
FBgn0032981	CG3635	55.96484746	-0.634182799	0.161105826	-3.936436169	8.27E-05	0.000489192
FBgn0260393	CG17147	5.644380218	-3.16843686	0.804985441	-3.936017598	8.28E-05	0.000489719
FBgn0004797	mdy	21.8270549	-1.083252883	0.275255477	-3.935445339	8.30E-05	0.000490474
FBgn0031174	CG1486	143.6480579	-0.613645378	0.155932491	-3.935327224	8.31E-05	0.000490474
FBgn0031500	CG17221	82.95388433	-0.846527058	0.215227037	-3.933181768	8.38E-05	0.000494545
FBgn0038660	CG14291	5.448268277	2.604790035	0.662293187	3.932986307	8.39E-05	0.000494618
FBgn0019643	Dat	4393.974245	-0.711663135	0.181094238	-3.929794471	8.50E-05	0.000500897
FBgn0032138	CG4364	864.4191819	0.790338561	0.201315892	3.925862752	8.64E-05	0.000508812
FBgn0086655	jing	12.59259972	1.42224341	0.362369303	3.924845172	8.68E-05	0.000510629
FBgn0032702	CG10376	31.85884027	1.044959144	0.266258899	3.924598001	8.69E-05	0.000510814
FBgn0037687	CG8132	127.1727923	-0.507394739	0.129302604	-3.924087554	8.71E-05	0.000511559
FBgn0050373	CG30373	405.5085244	-1.165357867	0.296998791	-3.923779832	8.72E-05	0.000511873
FBgn0038889	Fancm	31.0621781	1.040527181	0.265394757	3.920677227	8.83E-05	0.000518166
FBgn0037489	CG1234	43.46640822	0.756398713	0.192945888	3.920263445	8.85E-05	0.000518713
FBgn0261563	wb	14.52338204	1.29738408	0.330972227	3.919918273	8.86E-05	0.00051877
FBgn0263929	jvl	214.139714	0.749942946	0.191315056	3.91993688	8.86E-05	0.00051877
FBgn0030511	CG11158	39.69676982	-1.014470908	0.258836405	-3.919351719	8.88E-05	0.000519647
FBgn0035424	CG11505	259.2565877	0.635473074	0.162210785	3.917575974	8.94E-05	0.000523143
FBgn0021814	Vps28	190.7998243	-0.45237993	0.115507575	-3.916452497	8.99E-05	0.000525239
FBgn0034243	Ns2	53.31568399	0.67946428	0.173572964	3.914574402	9.06E-05	0.000528995
FBgn0015299	Ssb-c31a	133.7069107	-1.028548652	0.262821363	-3.913489524	9.10E-05	0.000530765
FBgn0030018	slpr	138.3567974	0.631421673	0.161346532	3.913450538	9.10E-05	0.000530765
FBgn0027866	CG9776	132.1822485	0.500052575	0.127853309	3.911142991	9.19E-05	0.00053551
FBgn0035088	CG3776	85.79231859	-0.644134765	0.164731826	-3.910202291	9.22E-05	0.000537246
FBgn0003328	scb	195.7061305	0.567509796	0.145147981	3.909870409	9.23E-05	0.000537631
FBgn0011604	Iswi	18.11641977	1.124394052	0.287651025	3.908882476	9.27E-05	0.00053948
FBgn0000464	Lar	30.89509068	0.956751408	0.244849575	3.907506923	9.33E-05	0.000542203
FBgn0033863	CG13337	1.728851975	3.979063955	1.018434457	3.907039799	9.34E-05	0.000542896
FBgn0032684	CG10178	56.49022051	0.770822206	0.197358513	3.905695239	9.40E-05	0.000545566
FBgn0034663	CG4363	2725.321506	-0.845183545	0.216446142	-3.904821481	9.43E-05	0.000547183
FBgn0031187	Usp2	187.7437987	0.480800165	0.12318793	3.902981123	9.50E-05	0.000551001
FBgn0033813	fsd	34.09022585	-1.211292529	0.310520312	-3.900847966	9.59E-05	0.000555515
FBgn0260655	l(3)76BDm	54.54332874	0.781027467	0.200256881	3.900127998	9.61E-05	0.000556806
FBgn0002932	neur	43.19678052	0.707293715	0.181486586	3.897223095	9.73E-05	0.000563157
FBgn0003308	ry	41.56823822	-0.786632947	0.201921682	-3.895732938	9.79E-05	0.000566261
FBgn0026189	prominin-like	47.83409139	0.987159013	0.253407095	3.895546071	9.80E-05	0.000566328
FBgn0026761	Trap1	101.2622247	0.619040685	0.158999291	3.893355013	9.89E-05	0.000571097
FBgn0050115	GEFmeso	83.34239247	1.109037125	0.284877647	3.89302965	9.90E-05	0.000571491
FBgn0004132	boca	99.16296732	-1.116484109	0.286846634	-3.892268469	9.93E-05	0.000572915
FBgn0004629	Cys	859.2835633	-0.82878347	0.21297061	-3.891539166	9.96E-05	0.000574266
FBgn0010423	TpnC47D	147.3528483	-0.762084733	0.19587245	-3.890719352	9.99E-05	0.000575835
FBgn0020503	CLIP-190	262.0961965	0.574379646	0.147680731	3.889333713	0.00010052	0.000578756
FBgn0024728	Slip1	33.3703782	1.038418195	0.267019552	3.888921945	0.00010069	0.000578987
FBgn0034067	CG8399	372.2445153	-0.885958498	0.227815885	-3.888923273	0.00010069	0.000578987
FBgn0010825	Gug	449.8247046	0.463927674	0.119339771	3.88745236	0.000101302	0.000582124
FBgn0030863	CG8188	40.98353987	0.878238224	0.226096793	3.884346223	0.000102606	0.000589234
FBgn0028664	VhaM9.7-c	45.34134731	-0.75183538	0.19358089	-3.883830573	0.000102824	0.000590103
FBgn0000575	emc	171.064731	0.959827671	0.247216253	3.882542753	0.00010337	0.000592854
FBgn0267033	mamo	245.3119063	0.801299482	0.206432233	3.881658748	0.000103746	0.000594629
FBgn0051720	mthl15	101.9870844	0.518742003	0.133654223	3.881224189	0.000103932	0.000595308
FBgn0031360	CG31937	142.9996855	-0.670079371	0.172699237	-3.880036659	0.000104441	0.000597778
FBgn0040238	Best1	33.54620107	0.890267434	0.229456112	3.879902895	0.000104498	0.000597778
FBgn0022710	Ac13E	202.9124843	0.572261004	0.147597624	3.877169487	0.000105679	0.000604142
FBgn0035868	CG7194	177.5392293	-0.635384921	0.163895957	-3.876757752	0.000105858	0.000604774
FBgn0040305	MTF-1	132.7396437	0.774909258	0.19995631	3.875392872	0.000106453	0.000607782
FBgn0045823	vsg	579.1028947	0.521958044	0.134719901	3.874394501	0.00010689	0.000609886
FBgn0035622	TM9SF3	99.01793945	-0.562139457	0.145159412	-3.872566357	0.000107695	0.000614085
FBgn0032480	Edem2	217.1198275	-0.419323729	0.108297408	-3.871964588	0.000107962	0.000615208
FBgn0005278	Sam-S	162.8108523	0.685676474	0.177126197	3.871118356	0.000108337	0.000616951
FBgn0034247	CG6484	4596.611091	-1.053015585	0.272083118	-3.870198171	0.000108747	0.000618887
FBgn0053012	CG33012	8.095800062	-1.915053836	0.494841162	-3.870037465	0.000108819	0.000618897
FBgn0000150	awd	4801.775613	-0.983991327	0.25430673	-3.869309037	0.000109144	0.000620351
FBgn0035842	CG7504	11.576695	1.681802757	0.43516936	3.864708575	0.000111222	0.000631755
FBgn0040363	CG11384	21.33909634	1.032563666	0.267216405	3.864147738	0.000111478	0.000632802
FBgn0039802	dj-1beta	222.758732	-0.917436431	0.237479886	-3.863217418	0.000111903	0.000634811
FBgn0036974	eRF1	195.7754028	-0.587977281	0.152239585	-3.862183938	0.000112378	0.000637096
FBgn0033349	CG8243	242.1643009	-0.491397665	0.127241848	-3.86191864	0.0001125	0.00063738
FBgn0039358	CG5028	271.8922157	0.712836191	0.184616774	3.861166978	0.000112847	0.000638936
FBgn0051673	CG31673	179.3782173	-0.49945211	0.129512356	-3.856405104	0.000115067	0.00065109
FBgn0039357	CG4743	42.67889984	-0.710853539	0.184368199	-3.855619044	0.000115437	0.000652769
FBgn0266411	sima	166.5795982	1.017327351	0.263941821	3.854362096	0.000116032	0.000655713
FBgn0261244	inaE	107.0227539	-0.759602069	0.197172465	-3.852475383	0.00011693	0.000660366
FBgn0005640	Eip63E	117.8123788	0.77676598	0.201695571	3.851180144	0.00011755	0.00066328
FBgn0029666	CG10803	37.8120953	1.149544197	0.298498729	3.851085729	0.000117595	0.00066328
FBgn0011836	Taf2	25.28308697	1.021798843	0.265403113	3.849988156	0.000118124	0.000665835
FBgn0034460	CG18367	25.34833702	-1.015284973	0.263734266	-3.849651348	0.000118286	0.000666327
FBgn0034052	CG8299	2074.523898	-0.605501989	0.157307759	-3.849155268	0.000118526	0.000667254
FBgn0031213	galectin	318.5766229	0.439565503	0.114239637	3.847749461	0.000119208	0.000670667
FBgn0020616	SA	18.13208062	1.169294861	0.303919172	3.847387627	0.000119384	0.000671232
FBgn0038388	CG4287	136.374335	-0.826164553	0.214790305	-3.846377297	0.000119877	0.000673577
FBgn0052069	CG32069	96.91425399	-1.209211508	0.314393681	-3.846169887	0.000119979	0.00067372
FBgn0001624	dlg1	104.4131201	0.857481391	0.222975214	3.845635459	0.00012024	0.000674763
FBgn0034180	Ehbp1	59.87104995	1.135826667	0.295414931	3.844851923	0.000120625	0.000676494
FBgn0031327	CG5397	33.35428957	1.060979066	0.276001882	3.844100836	0.000120995	0.00067814
FBgn0035464	CG12006	33.63229643	0.942251057	0.245236999	3.842205946	0.000121933	0.000682966
FBgn0259736	CG42390	43.03595633	1.488274188	0.387440159	3.841300783	0.000122384	0.000685057
FBgn0031294	IA-2	686.4236833	0.625227979	0.163057867	3.834393207	0.000125875	0.000704151
FBgn0263111	cac	4.914786464	2.393983926	0.624509526	3.83338256	0.000126393	0.000706606
FBgn0051092	LpR2	182.0598803	0.827867418	0.215972456	3.833208337	0.000126483	0.000706661
FBgn0015001	iotaTry	1317.671717	-0.695220907	0.181419151	-3.832125241	0.000127041	0.000709332
FBgn0028397	Tob	73.61877818	0.677389293	0.176800376	3.831379263	0.000127427	0.000710591
FBgn0085265	CG34236	523.5886655	0.436125821	0.113827864	3.831450444	0.00012739	0.000710591
FBgn0035497	CG14995	26.82327469	1.161220663	0.303160365	3.830384173	0.000127943	0.000713023
FBgn0030774	spheroide	3159.546645	-0.781037275	0.204056911	-3.827546313	0.000129427	0.000720838
FBgn0039671	CG11470	2.280363286	3.852573634	1.006936757	3.82603337	0.000130225	0.000724824
FBgn0042112	mRpL36	71.21713521	-0.887877352	0.232244484	-3.82302881	0.000131822	0.000733257
FBgn0034913	Snap29	54.67831097	-0.664848504	0.174099293	-3.818789211	0.000134108	0.000745504
FBgn0002921	Atpalpha	251.6134383	0.883245607	0.23144636	3.81620003	0.000135523	0.000752894
FBgn0033698	CG8858	61.66020894	0.942894262	0.247087964	3.816026674	0.000135618	0.000752951
FBgn0034968	RpL12	5930.448832	0.342772683	0.089830913	3.815754191	0.000135768	0.00075331
FBgn0004556	Dbp73D	21.07637373	1.197748589	0.3139959	3.814535762	0.000136439	0.000756184
FBgn0030853	ND-24	583.9079744	-0.639879183	0.167748945	-3.814504968	0.000136456	0.000756184
FBgn0033734	CG8520	84.87949844	-0.670676775	0.175896628	-3.812902957	0.000137344	0.000760629
FBgn0038419	CG14879	16.98071357	1.183582231	0.310486828	3.812020746	0.000137835	0.000762872
FBgn0033639	CG9003	71.49780563	0.726146082	0.190589044	3.810009563	0.000138961	0.000768625
FBgn0015778	rin	811.9460371	0.429489474	0.112741702	3.809499637	0.000139248	0.000769731
FBgn0262103	Sik3	48.01982575	0.787245678	0.206679815	3.809010942	0.000139524	0.000770773
FBgn0039431	plum	19.62301217	1.137781565	0.298833518	3.807409463	0.00014043	0.000775297
FBgn0033373	CG8080	75.52925998	-0.623991053	0.163933728	-3.806361642	0.000141026	0.000778102
FBgn0051713	Apf	59.8201675	-1.041134823	0.27370592	-3.803844733	0.000142467	0.000785566
FBgn0261530	nbs	26.13188957	1.13526466	0.298483764	3.803438561	0.000142701	0.000786366
FBgn0024997	CG2681	586.3899318	-0.425117795	0.111788034	-3.802891773	0.000143017	0.000787126
FBgn0260748	CG5004	88.32880738	0.6996471	0.183974371	3.8029596	0.000142978	0.000787126
FBgn0001142	Gs1	385.3609733	-0.610323126	0.160610505	-3.800019976	0.000144684	0.000795809
FBgn0033212	LRR	115.029496	0.740394805	0.194848762	3.799843526	0.000144787	0.000795882
FBgn0052576	CG32576	71.28326592	-0.617953354	0.162669927	-3.798817422	0.000145388	0.000798688
FBgn0039189	CG18528	23.54637125	-1.18141557	0.311073512	-3.797866173	0.000145947	0.000801262
FBgn0036254	CG5645	15.27100806	1.365191715	0.359481177	3.797672323	0.000146061	0.000801392
FBgn0038080	CG12279	154.2264551	-0.995747034	0.262211173	-3.7975004	0.000146163	0.000801452
FBgn0062928	pncr009:3L	189.4072529	-1.044519705	0.275151505	-3.79616206	0.000146953	0.00080529
FBgn0011761	dhd	12.34310966	-6.382667437	1.681552092	-3.795700096	0.000147227	0.000806293
FBgn0034935	Orcokinin	181.9874953	-0.493112767	0.129938189	-3.794979523	0.000147656	0.000808139
FBgn0032400	CG6770	9394.79554	0.674753962	0.177871396	3.793493384	0.000148543	0.000812491
FBgn0022153	l(2)k05819	44.13889605	0.802708076	0.211639252	3.792812864	0.00014895	0.000814219
FBgn0035228	CG12091	297.7768484	0.568452656	0.149911035	3.791933376	0.000149479	0.000816605
FBgn0044452	Atg2	93.66331049	0.646663235	0.170562193	3.791363283	0.000149823	0.000817898
FBgn0058198	CG40198	316.8048348	-0.764772914	0.201721332	-3.791234697	0.0001499	0.000817898
FBgn0035743	CG15829	218.8393075	-1.030283994	0.271899433	-3.789209796	0.000151127	0.000823578
FBgn0086608	CG34112	265.5180579	-0.724724397	0.191252561	-3.789357861	0.000151037	0.000823578
FBgn0010379	Akt1	85.87480717	0.644565724	0.170284515	3.785228069	0.000153568	0.000835462
FBgn0050022	CG30022	80.75914601	-0.765802582	0.202313945	-3.785218962	0.000153573	0.000835462
FBgn0262843	CG43207	39.67863757	-0.977326344	0.258197385	-3.785190711	0.000153591	0.000835462
FBgn0003984	vn	5.189904896	2.426374503	0.641356406	3.783192126	0.00015483	0.000841685
FBgn0039543	CG12428	146.4651741	-0.654927085	0.173139103	-3.782664188	0.000155159	0.000842956
FBgn0031660	mRpL28	323.7604999	-0.413557403	0.109362882	-3.781515213	0.000155877	0.000846338
FBgn0013704	mt:tRNA:Arg-TCG	1178.584041	-1.322868807	0.349994842	-3.779680867	0.000157029	0.000851553
FBgn0050443	Opbp	61.82106587	-0.675893557	0.178822419	-3.77969139	0.000157023	0.000851553
FBgn0042126	CG18788	18.09628618	1.161972225	0.307581042	3.777775826	0.000158235	0.000857567
FBgn0265784	CrebB	142.4916453	0.432969066	0.114654999	3.776277278	0.00015919	0.000862213
FBgn0261238	Alh	32.99314911	0.899113862	0.238116465	3.775941582	0.000159404	0.000862848
FBgn0033624	CG12384	1614.926897	-0.531722433	0.140841037	-3.77533738	0.000159791	0.000863887
FBgn0037063	CG9391	182.1998056	-0.762949034	0.202080999	-3.775461506	0.000159712	0.000863887
FBgn0033296	Mal-A7	3000.002031	-0.949644174	0.251577722	-3.774754636	0.000160165	0.000865381
FBgn0003716	tkv	54.15660625	1.255705811	0.332848177	3.772608351	0.00016155	0.000872329
FBgn0001995	mRpL4	115.6765622	-0.50398204	0.133626113	-3.771583474	0.000162215	0.00087505
FBgn0032850	Kua	88.83264355	0.875089728	0.232025272	3.771527654	0.000162251	0.00087505
FBgn0035529	Fdx2	286.3985696	-0.551430114	0.14626768	-3.770006567	0.000163243	0.000879865
FBgn0036290	CG10638	83.44187826	-0.657179587	0.174387639	-3.768498668	0.000164232	0.000884658
FBgn0026196	nop5	298.8034951	0.574769569	0.152594481	3.766647153	0.000165455	0.000890701
FBgn0270927	betaGlu	35.97075745	0.900512275	0.239136292	3.765686375	0.000166092	0.00089359
FBgn0263395	hppy	59.08713929	0.820716984	0.218005234	3.76466642	0.000166772	0.000896701
FBgn0029092	ced-6	18.4677479	1.110736077	0.29511913	3.763687148	0.000167426	0.000899675
FBgn0013705	mt:tRNA:Ser-GCT	3866.734937	-1.836598153	0.488107824	-3.76268944	0.000168096	0.000902726
FBgn0017482	T3dh	83.85160008	-0.816496211	0.217059279	-3.761627775	0.000168811	0.000906018
FBgn0038049	CG5844	100.8901221	-0.636492226	0.169217041	-3.761395565	0.000168968	0.000906311
FBgn0040340	TRAM	109.8814128	-0.770334565	0.204994521	-3.757830014	0.000171393	0.000918763
FBgn0020385	pug	90.26442665	-0.659270248	0.175497925	-3.756570047	0.000172258	0.000922612
FBgn0267972	Der-1	114.9089503	-0.760776317	0.202523674	-3.756480913	0.000172319	0.000922612
FBgn0037843	CG4511	28.97719828	0.979875762	0.260980654	3.754591562	0.000173624	0.000929037
FBgn0015218	eIF-4E	116.2621232	0.686157043	0.182770696	3.754196161	0.000173899	0.000929943
FBgn0039645	CG11898	390.9438557	-0.417102794	0.111151349	-3.752566196	0.000175034	0.000935448
FBgn0086899	Tlk	264.5503985	0.536973872	0.143139635	3.751398928	0.000175851	0.000939248
FBgn0030350	SelG	1072.437208	-0.626953941	0.16717332	-3.750322972	0.000176607	0.000942719
FBgn0033544	CG7220	826.4312457	0.771480856	0.205727997	3.750004213	0.000176832	0.00094335
FBgn0031771	ND-51	906.4547872	-0.436942373	0.11652307	-3.74983576	0.00017695	0.000943416
FBgn0030421	CG3812	6.588549377	-2.446098751	0.652354328	-3.749647465	0.000177083	0.000943557
FBgn0035203	CG9149	59.86342884	-0.900759635	0.240424521	-3.746538121	0.000179292	0.00095475
FBgn0011666	msi	21.2954953	1.213454675	0.323904497	3.746334754	0.000179437	0.00095495
FBgn0266582	ND-30	1139.204015	-0.902164964	0.240853509	-3.745699895	0.000179892	0.000956794
FBgn0024987	ssx	29.17773013	0.823265863	0.219863763	3.744436336	0.000180799	0.000961045
FBgn0030270	CG15199	557.6833298	1.864834335	0.498189113	3.743225787	0.000181673	0.000964531
FBgn0046689	Takl1	307.4226913	0.637003309	0.170170637	3.743320942	0.000181604	0.000964531
FBgn0039955	CG41099	120.2394965	-0.524677441	0.140265106	-3.740612729	0.000183572	0.000974032
FBgn0259211	grh	4.73850963	2.33705897	0.624875355	3.740040237	0.000183991	0.000975669
FBgn0027375	RecQ5	28.9747759	1.119788196	0.299430739	3.739723582	0.000184223	0.000976314
FBgn0035587	Gdap1	45.33234715	-0.937612492	0.250739831	-3.73938392	0.000184472	0.00097705
FBgn0000318	cl	2455.757231	-0.914378449	0.244569678	-3.738723687	0.000184957	0.000979034
FBgn0036272	CG4300	232.1400206	-0.640365679	0.171356711	-3.737032965	0.000186205	0.00098505
FBgn0035944	CG5021	150.4514109	-0.496698792	0.133158685	-3.730126883	0.000191383	0.001011616
FBgn0042174	CR18854	364.0362176	-0.676064189	0.181248852	-3.730032939	0.000191455	0.001011616
FBgn0027291	l(1)G0156	747.9718122	0.788062125	0.211300365	3.72958242	0.000191797	0.001012823
FBgn0035670	CG10472	56979.28451	-0.71918154	0.192889877	-3.728456615	0.000192656	0.001016751
FBgn0264750	CG44008	4731.575604	-0.716137853	0.192101559	-3.727912767	0.000193072	0.001018341
FBgn0034072	Dg	37.1467297	0.875591706	0.23491851	3.727214628	0.000193608	0.001020557
FBgn0263830	CG40486	72.86180927	-0.959392272	0.257457415	-3.726411501	0.000194225	0.001023204
FBgn0040007	RpL38	11691.05332	-1.239263273	0.332597632	-3.726013518	0.000194532	0.001024211
FBgn0026431	Grip75	10.48126255	1.510292762	0.405591862	3.723676195	0.000196343	0.001033131
FBgn0051997	CG31997	47.30424988	-0.808474161	0.217128257	-3.723486621	0.00019649	0.001033294
FBgn0036337	AdenoK	229.8219642	-0.762189069	0.204707347	-3.723310759	0.000196627	0.001033401
FBgn0262881	CG43236	6.691728504	2.164740956	0.581478014	3.722825116	0.000197006	0.001034778
FBgn0042185	CG18769	14.2298154	1.228408623	0.330031548	3.722094545	0.000197577	0.001037162
FBgn0085409	CG34380	10.66824045	1.459689339	0.392292613	3.720919771	0.000198498	0.001041383
FBgn0004449	Ten-m	21.77304103	1.152981794	0.309914219	3.720325565	0.000198966	0.001043218
FBgn0030738	CG9915	79.22262944	0.571161486	0.153566866	3.719301575	0.000199774	0.001046837
FBgn0036919	Grasp65	161.9980196	-0.529575905	0.142504005	-3.716217681	0.000202227	0.001059064
FBgn0266464	Nsf2	49.25923884	-0.800912342	0.2155442	-3.715768469	0.000202587	0.001060321
FBgn0085408	Shroom	256.9681802	0.63096466	0.169816655	3.715564056	0.000202751	0.001060552
FBgn0041707	7B2	60.10805049	-0.667331006	0.179635161	-3.714924202	0.000203265	0.001062612
FBgn0083968	CG34132	255.4533097	-0.583688962	0.157206289	-3.712885568	0.00020491	0.00107058
FBgn0000273	Pka-C1	232.0363803	0.898059229	0.241968828	3.711466621	0.000206062	0.001075966
FBgn0039319	CG13659	76.74549857	-0.924582764	0.249254427	-3.709393544	0.000207756	0.001084175
FBgn0029504	CHES-1-like	209.2965312	0.70001764	0.188776982	3.708172648	0.00020876	0.001088773
FBgn0010531	Ccs	177.3889487	-0.792026638	0.21387525	-3.703217819	0.000212882	0.001109616
FBgn0024250	brk	139.8986596	0.911508243	0.246180722	3.702597977	0.000213403	0.001111677
FBgn0085432	pan	165.1279026	0.757795224	0.204703205	3.701921642	0.000213973	0.001113991
FBgn0034644	CG10082	107.2953813	0.831486967	0.224677826	3.70079675	0.000214924	0.001118284
FBgn0021760	chb	72.04592932	0.76712734	0.207295651	3.700643675	0.000215053	0.001118302
FBgn0015338	CG5861	236.5686499	-0.843234635	0.228061631	-3.697398079	0.000217821	0.001131566
FBgn0033744	Dh44-R2	30.00011262	0.907488074	0.245442638	3.697352995	0.000217859	0.001131566
FBgn0003392	shi	278.6112115	0.576425159	0.155926774	3.69676833	0.000218361	0.00113351
FBgn0010395	Itgbn	42.5109226	0.937915508	0.253739647	3.696369566	0.000218705	0.001134297
FBgn0023517	Pgam5	57.29076247	-0.731406072	0.197875481	-3.6962946	0.000218769	0.001134297
FBgn0023526	CG2865	311.6439084	0.912128954	0.246796823	3.695869919	0.000219135	0.00113553
FBgn0004888	Scsalpha	649.4120764	-0.742542652	0.200977068	-3.694663569	0.000220178	0.001140268
FBgn0034428	CG18606	1.62348228	-4.468013334	1.209427305	-3.694321532	0.000220475	0.001140471
FBgn0036760	CG5567	162.7106723	-1.061519177	0.287327892	-3.694452255	0.000220361	0.001140471
FBgn0050185	AIMP3	182.0351572	-0.770549469	0.208625303	-3.693461231	0.000221222	0.00114367
FBgn0001085	fz	24.35905281	1.242632398	0.336478967	3.693046282	0.000221584	0.001144634
FBgn0038877	CG3308	93.52299059	0.685213973	0.185546473	3.692950676	0.000221667	0.001144634
FBgn0035227	Iml1	31.35345544	0.876908062	0.237528835	3.69179625	0.000222676	0.001149173
FBgn0086785	Vps36	160.6703661	-0.553232938	0.149967336	-3.689022915	0.000225117	0.001161095
FBgn0014903	CG14630	15.94724905	-1.512519919	0.4103811	-3.685647121	0.000228122	0.001175911
FBgn0015905	ast	16.14058206	1.251509684	0.339892405	3.68207605	0.000231342	0.00119044
FBgn0027492	wdb	283.8574974	0.680840732	0.184906837	3.682074399	0.000231344	0.00119044
FBgn0030944	CG6617	99.34258602	-1.098673233	0.298370432	-3.68224568	0.000231188	0.00119044
FBgn0050499	CG30499	159.0507881	-1.120749129	0.304459295	-3.681113201	0.000232218	0.001194244
FBgn0053170	CG33170	340.8670968	-0.77254935	0.209989777	-3.678985522	0.000234164	0.001203552
FBgn0039252	CG11771	179.3694244	-0.552635969	0.150225772	-3.678702802	0.000234423	0.001204188
FBgn0010300	brat	42.15846607	0.759586501	0.206646974	3.675768813	0.000237134	0.001217408
FBgn0050183	CG30183	14.11347432	1.157322553	0.31501897	3.673818607	0.000238952	0.001226032
FBgn0038771	CG4390	162.634836	-0.629116131	0.171271473	-3.673210264	0.000239522	0.001228245
FBgn0025864	Crag	169.2949948	0.625702973	0.170367462	3.672667104	0.000240032	0.001230147
FBgn0020910	RpL3	7867.182654	0.406569945	0.110710692	3.672363876	0.000240317	0.001230896
FBgn0036659	CG9701	71.35036944	-0.938387612	0.255551587	-3.672008543	0.000240652	0.001231897
FBgn0083953	CG34117	115.8204333	-0.802972939	0.218711808	-3.671374426	0.00024125	0.001234245
FBgn0001189	hfw	217.8278453	0.650721675	0.177292866	3.670320687	0.000242246	0.00123863
FBgn0262601	SmB	140.8474674	-0.999232578	0.272259963	-3.67014146	0.000242416	0.001238784
FBgn0032781	RtcB	63.21234349	-0.603125672	0.164379553	-3.669103978	0.000243402	0.001243104
FBgn0267398	Yeti	482.9370422	-0.373340658	0.101756717	-3.668953459	0.000243545	0.00124312
FBgn0004363	porin	6477.582134	-0.766973521	0.209083941	-3.668256486	0.00024421	0.001245795
FBgn0260959	MCPH1	35.86699404	1.254332149	0.34202345	3.667386399	0.000245042	0.001249321
FBgn0051267	CG31267	1504.364938	-0.61801795	0.168690135	-3.663628275	0.000248668	0.001267075
FBgn0002570	Mal-A1	11021.99758	-0.655251803	0.178873937	-3.663204458	0.00024908	0.001268445
FBgn0031217	CG11377	78.83251366	-0.540240977	0.147531043	-3.661880014	0.000250371	0.00127429
FBgn0267384	Ubc7	253.5431448	-0.475188502	0.129835819	-3.659918385	0.000252296	0.001283347
FBgn0037199	CG11137	634.3219897	-1.124082312	0.307271878	-3.658266149	0.000253927	0.001290906
FBgn0030178	CG2974	22.41977512	-0.925569695	0.253183877	-3.65572131	0.00025646	0.001303034
FBgn0041092	tai	172.8220497	0.902995099	0.247069602	3.654820713	0.000257362	0.001306867
FBgn0017561	Ork1	82.26896853	-0.73610612	0.201496211	-3.653200797	0.000258992	0.001314389
FBgn0035523	CG1311	26.35197591	0.976430455	0.267306598	3.652848307	0.000259347	0.001315442
FBgn0261804	CG42750	4.796210192	2.525853658	0.691541101	3.652499691	0.0002597	0.001316476
FBgn0030799	CG4872	109.9567137	-0.886764559	0.242879923	-3.65104101	0.00026118	0.00132322
FBgn0037328	RpL35A	2875.146215	0.505829	0.138580591	3.650071022	0.000262168	0.001327468
FBgn0259832	CG34229	83.93551027	-0.885724731	0.242738463	-3.648884972	0.000263381	0.001332849
FBgn0278598	CR46268	5.933265303	1.943112617	0.53255916	3.648632419	0.00026364	0.001333398
FBgn0029688	lva	72.67650137	1.066592868	0.292546286	3.645894404	0.000266463	0.001346791
FBgn0034432	CG7461	404.3262792	-0.42400011	0.116299184	-3.645770295	0.000266592	0.001346791
FBgn0028690	Rpn5	109.0251532	0.966305307	0.265145187	3.644438423	0.000267976	0.001353013
FBgn0027655	htt	39.37272818	0.915248983	0.251154276	3.644170414	0.000268256	0.001353652
FBgn0035720	CG10077	140.994723	0.823663485	0.226164314	3.641880849	0.000270653	0.001364974
FBgn0031779	CG9175	44.49299487	-0.814521986	0.223716875	-3.64086073	0.000271728	0.001369615
FBgn0036762	CG7430	688.8162978	-0.922027384	0.253427097	-3.6382352	0.000274513	0.001382863
FBgn0042094	Adk3	72.26133009	-0.733191231	0.201586171	-3.637110768	0.000275713	0.001388123
FBgn0030668	CG8128	351.6073113	-0.537761384	0.147991808	-3.633723998	0.00027936	0.001405682
FBgn0052279	Drsl2	88.34070714	1.990730101	0.547900599	3.633378213	0.000279735	0.001406769
FBgn0046296	CG11534	99.6189658	-0.69770426	0.192042194	-3.633077951	0.00028006	0.001407609
FBgn0022942	Cbp80	38.40138017	0.94521943	0.260289566	3.631414984	0.000281872	0.001415107
FBgn0034988	cN-IIIB	396.2680352	-0.51931493	0.14300416	-3.63146728	0.000281814	0.001415107
FBgn0040389	mRpL14	60.76742957	-1.005006438	0.276789294	-3.630944044	0.000282386	0.001416889
FBgn0264449	CG43867	5.909705279	1.997088657	0.550374175	3.628601681	0.000284961	0.001428996
FBgn0086768	Pcmt	182.3858807	-0.604385644	0.16658161	-3.628165454	0.000285442	0.001430602
FBgn0005666	bt	354.081962	1.337081241	0.36857407	3.627713797	0.000285942	0.001431534
FBgn0264958	CR44127	30.11065635	-1.24639063	0.343575494	-3.62770527	0.000285951	0.001431534
FBgn0001961	Arpc1	346.3209187	-0.65650537	0.181007882	-3.626943555	0.000286796	0.001434951
FBgn0013683	mt:ND4L	73.09196993	-1.054273963	0.290811955	-3.62527724	0.000288652	0.001443421
FBgn0262518	Rab8	90.13960294	0.639144883	0.17637818	3.62371856	0.000290398	0.001451333
FBgn0265276	l(3)neo38	89.65354804	0.580307533	0.16021588	3.622035054	0.000292295	0.00145999
FBgn0037563	CG11672	646.1378621	-0.389938867	0.107667843	-3.621683659	0.000292692	0.001461151
FBgn0264693	ens	362.2091834	0.558911554	0.15434596	3.621160889	0.000293284	0.001463283
FBgn0030343	ATP7	48.04604038	-0.775464708	0.214178916	-3.620639799	0.000293875	0.001465408
FBgn0029665	CG14270	62.42091116	-0.895265921	0.247315829	-3.61992973	0.000294683	0.001468609
FBgn0000489	Pka-C3	36.67708793	1.16351933	0.321496806	3.619069642	0.000295664	0.00147267
FBgn0260027	CG42495	32.32754541	-0.730667095	0.20193506	-3.618327082	0.000296514	0.001476071
FBgn0263019	CR43314	212.5868099	0.575921328	0.159261025	3.616210104	0.000298948	0.001487353
FBgn0002945	nkd	20.66066923	1.219934952	0.337596795	3.613585699	0.000301991	0.001501418
FBgn0027525	LTV1	202.7214083	0.616345504	0.170568359	3.613480871	0.000302114	0.001501418
FBgn0051151	wge	152.8503994	0.640084784	0.177155102	3.613132084	0.00030252	0.001502598
FBgn0040827	CG13315	6940.242839	-0.940615324	0.260423196	-3.611872286	0.000303994	0.001509072
FBgn0031830	COX5B	3812.544649	-0.886610629	0.2454821	-3.611711926	0.000304182	0.00150916
FBgn0023542	Nmd3	224.7317627	0.540578377	0.149680453	3.611549579	0.000304373	0.00150926
FBgn0039075	CG4393	18.50024398	1.208399141	0.33465814	3.6108464	0.000305199	0.001512512
FBgn0039226	Ude	35.35674729	0.837598077	0.231981804	3.610619721	0.000305466	0.001512989
FBgn0022764	Sin3A	84.86269974	0.88411274	0.244979977	3.608918367	0.000307476	0.001522094
FBgn0050338	CG30338	23.75304142	-0.871119169	0.241477926	-3.607448444	0.000309223	0.001529885
FBgn0037720	CG8312	103.4902285	0.673070932	0.186666498	3.605740389	0.000311264	0.001539125
FBgn0038271	UQCR-C1	1860.533762	-0.552038012	0.153158536	-3.604356807	0.000312927	0.001546484
FBgn0085443	spri	23.49809839	1.043853452	0.289671146	3.603581053	0.000313863	0.001550244
FBgn0038805	TFAM	172.2676919	-0.601758561	0.167002907	-3.603281958	0.000314224	0.001551165
FBgn0030301	HP5	49.54379178	0.859082411	0.238487911	3.602205271	0.000315529	0.001556739
FBgn0039928	Cals	75.96056925	0.841605494	0.233729455	3.600767794	0.000317279	0.001564501
FBgn0032052	PIG-U	64.11012273	0.670874993	0.18633539	3.600362739	0.000317774	0.001566069
FBgn0011591	fng	7.153999659	1.625268966	0.451503586	3.599681191	0.000318608	0.001569306
FBgn0004373	fwd	65.23017013	0.766508711	0.213028167	3.598156626	0.000320481	0.001577049
FBgn0019936	RpS20	6035.716906	0.384470723	0.106853462	3.598111995	0.000320536	0.001577049
FBgn0039751	CG1983	131.3216169	-0.673103086	0.187113524	-3.597297893	0.00032154	0.001581012
FBgn0052441	CG32441	1190.153909	-0.713398204	0.198322052	-3.597170333	0.000321698	0.001581012
FBgn0265101	Sgt1	273.2876637	-1.331674371	0.37074887	-3.591850115	0.000328339	0.001612754
FBgn0032479	CG16974	80.61734288	-0.715290471	0.199186727	-3.591054896	0.000329342	0.001616788
FBgn0259168	mnb	169.476078	0.765343107	0.213299233	3.588119361	0.000333072	0.001634191
FBgn0014022	Rlb1	17.63419329	1.116810751	0.311297564	3.58759875	0.000333737	0.00163655
FBgn0028833	Dak1	672.4933502	-0.769444305	0.214509096	-3.587000834	0.000334503	0.001639399
FBgn0035589	CHMP2B	101.1733771	-0.689320116	0.1922405	-3.585717447	0.000336153	0.001646573
FBgn0034312	CG10916	23.68905322	-0.917181736	0.25581256	-3.585366324	0.000336605	0.001647879
FBgn0031741	CG11034	330.5685693	-0.408501371	0.113947695	-3.584990208	0.000337091	0.001649344
FBgn0044871	Gos28	72.76986994	-0.634224536	0.176946979	-3.584263155	0.000338031	0.001653032
FBgn0024329	Mekk1	166.5652979	0.672229881	0.187599378	3.583326811	0.000339246	0.001658056
FBgn0266421	RPA3	62.68476367	-0.854908263	0.238612636	-3.582828954	0.000339893	0.001660305
FBgn0003277	RpII215	59.34302356	0.733242116	0.204746893	3.581212427	0.000342003	0.00166946
FBgn0033265	coil	34.91295087	0.782227445	0.21843187	3.581104929	0.000342144	0.00166946
FBgn0250838	roh	1602.520628	-0.496396906	0.138635906	-3.580579657	0.000342833	0.0016719
FBgn0034736	CG6018	666.4948581	-0.620351816	0.173338854	-3.578838798	0.000345124	0.001682149
FBgn0027598	cindr	775.1232092	0.509764786	0.142551406	3.576006728	0.000348883	0.001699532
FBgn0010355	Taf1	21.82755854	1.1501845	0.321742555	3.574859714	0.000350416	0.001706063
FBgn0023175	Prosalpha7	591.6408994	-0.531438466	0.148670046	-3.57461694	0.000350741	0.001706709
FBgn0032451	spict	152.7570975	-0.503264266	0.140799444	-3.574334191	0.00035112	0.001707616
FBgn0033972	Ciao1	416.5492063	-0.709315361	0.198644048	-3.570785877	0.000355912	0.001729969
FBgn0028687	Rpt1	206.3717486	-0.503752682	0.141088351	-3.570476791	0.000356332	0.001731063
FBgn0264962	Pcf11	123.3494269	0.599067759	0.167799461	3.570141151	0.000356789	0.001732332
FBgn0033672	rho-7	119.3227224	-0.526066946	0.14738616	-3.569310336	0.000357922	0.001736883
FBgn0027836	Dgp-1	90.13631649	-0.583890425	0.163593727	-3.569149236	0.000358142	0.001737
FBgn0000212	brm	71.7336268	0.830743571	0.232910421	3.566794342	0.000361375	0.001751719
FBgn0041087	wun2	24.51656128	0.868100087	0.243431206	3.566100252	0.000362333	0.001755402
FBgn0016917	Stat92E	639.1352436	0.678675709	0.190347977	3.565447446	0.000363236	0.001758816
FBgn0039310	CG11878	1053.089285	0.800896696	0.224666089	3.564831246	0.00036409	0.001761991
FBgn0031781	Arpc4	564.4412801	-0.605069289	0.169769572	-3.564062055	0.00036516	0.0017662
FBgn0033460	Sec24AB	121.5200316	0.972913867	0.273020061	3.563525202	0.000365908	0.001768853
FBgn0033543	CG12338	326.7862598	-0.32185075	0.090349436	-3.562288432	0.000367636	0.00177624
FBgn0000097	aop	206.963521	0.851674701	0.239229933	3.560067472	0.00037076	0.001790354
FBgn0014007	Ptp69D	6.752837711	1.621937115	0.455707639	3.55916157	0.000372041	0.001795562
FBgn0003731	Egfr	28.71777999	0.790746199	0.222181008	3.559017964	0.000372244	0.001795566
FBgn0031377	CG15356	18.58151343	1.031929343	0.290012428	3.558224555	0.00037337	0.001800017
FBgn0010040	GstD4	5.354497844	-1.858683823	0.522403482	-3.55794685	0.000373765	0.001800941
FBgn0085428	Nox	14.77704626	1.135085292	0.31906189	3.557570891	0.0003743	0.00180254
FBgn0038872	Nelf-A	16.81595033	1.191474503	0.334951095	3.557159599	0.000374886	0.001804383
FBgn0028539	CG31731	28.47779923	0.89103461	0.25054863	3.556333996	0.000376066	0.001809077
FBgn0031579	CG15422	910.3123985	-0.703737399	0.197926957	-3.555540939	0.000377202	0.001810611
FBgn0034354	GstE11	334.5994397	-1.160174911	0.326269841	-3.555875431	0.000376723	0.001810611
FBgn0040087	p115	86.65849748	-0.671784978	0.188931469	-3.55570717	0.000376964	0.001810611
FBgn0086779	step	49.66358922	0.997807567	0.280632841	3.555562365	0.000377171	0.001810611
FBgn0035411	Girdin	6.072437232	1.762512447	0.495758776	3.555181533	0.000377718	0.001812107
FBgn0017566	ND-75	910.7764698	-0.674779211	0.189811205	-3.555001996	0.000377976	0.001812363
FBgn0029664	CG10802	58.95648677	-0.976687329	0.274864019	-3.553347328	0.000380362	0.001822816
FBgn0034976	CG4049	6.465165626	1.763651108	0.496548459	3.551820726	0.000382575	0.001832433
FBgn0015572	alpha-Est4	24.87487555	-0.828657349	0.233387426	-3.550565531	0.000384404	0.001840199
FBgn0039118	CG10208	185.7230511	-0.981124626	0.276451666	-3.548991553	0.000386709	0.001850234
FBgn0037549	CG7878	157.220726	0.491117883	0.138466645	3.546831683	0.000389894	0.001864462
FBgn0005674	GluProRS	45.62198878	0.79902035	0.225321757	3.546130487	0.000390933	0.001867967
FBgn0261570	CG42684	53.96672832	0.738321854	0.208209511	3.546052489	0.000391048	0.001867967
FBgn0031535	CG12795	64.14620263	-0.867638297	0.244771941	-3.544680377	0.000393089	0.00187428
FBgn0036735	Edc3	109.3387102	0.71619291	0.202052081	3.544595555	0.000393216	0.00187428
FBgn0037877	CG6689	21.50414592	1.007051426	0.284091383	3.544815111	0.000392889	0.00187428
FBgn0038071	Dtg	24.46359064	1.035822769	0.292208998	3.544801076	0.000392909	0.00187428
FBgn0011661	Moe	1405.126961	0.526339683	0.148533511	3.543575315	0.000394741	0.001880535
FBgn0008635	betaCOP	126.3395364	-0.588084612	0.165989122	-3.542910556	0.000395737	0.001884269
FBgn0034365	CG5335	560.4355647	-0.496442007	0.140136569	-3.542558583	0.000396265	0.001885772
FBgn0036888	CG9330	204.9941042	0.498902956	0.14085084	3.542065887	0.000397006	0.001888284
FBgn0032730	CG10431	2.007248364	3.60721097	1.018531283	3.54158093	0.000397737	0.001890744
FBgn0033665	Zip48C	287.049368	-0.476367626	0.134521158	-3.541209672	0.000398297	0.001892391
FBgn0037466	CG1965	15.80402069	1.206438476	0.340746779	3.540571918	0.000399261	0.001895954
FBgn0015664	Dref	22.21813902	0.869416458	0.245589441	3.540121487	0.000399943	0.001898176
FBgn0026252	msk	183.4921292	0.532877843	0.150621914	3.537850694	0.000403398	0.00191355
FBgn0035793	CG7546	36.35346222	1.000910655	0.283031104	3.536398093	0.000405623	0.001923074
FBgn0030703	MSBP	2058.215013	-0.509622092	0.14414075	-3.535586515	0.000406871	0.001927959
FBgn0039109	CG10365	88.31094674	-0.743980506	0.210468123	-3.534884492	0.000407953	0.001932055
FBgn0085370	Pde11	168.2385013	0.836718228	0.236762682	3.5339954	0.000409328	0.001937531
FBgn0262731	pncr013:4	84.90131888	-0.807566965	0.228608491	-3.532532679	0.000411599	0.001947241
FBgn0013694	mt:tRNA:Gly-TCC	51.27746259	-1.394169135	0.394798893	-3.531340033	0.00041346	0.001954999
FBgn0010380	AP-1-2beta	147.7659232	-0.512212964	0.145068358	-3.530838649	0.000414244	0.00195662
FBgn0058263	MFS17	275.9834508	-0.434882159	0.123162426	-3.530964535	0.000414047	0.00195662
FBgn0016797	fz2	124.817747	0.447333131	0.126710243	3.530362824	0.00041499	0.001959098
FBgn0014184	Oda	8960.61281	-0.373622241	0.105906899	-3.527836674	0.000418971	0.001976836
FBgn0259722	CG42376	131.2121386	-0.584493011	0.165739594	-3.526574403	0.000420973	0.001985226
FBgn0025390	Mur2B	16.69749191	1.389855648	0.39421446	3.525633353	0.000422471	0.001991234
FBgn0264823	CR44031	15.71720078	-1.255003822	0.356132186	-3.523983152	0.000425111	0.002002611
FBgn0031979	CCDC53	57.26658284	-0.583974326	0.165785547	-3.522468254	0.000427548	0.002013021
FBgn0032679	bsf	105.9767	0.690333522	0.196053145	3.521155045	0.000429671	0.002021942
FBgn0026619	Taz	85.07036287	0.570670192	0.162233911	3.517576486	0.000435507	0.002048143
FBgn0036226	CG7252	5.036512028	2.256983067	0.641651761	3.517457917	0.000435701	0.002048143
FBgn0261548	CG42666	74.58524992	0.813621133	0.231423211	3.515728307	0.00043855	0.002060439
FBgn0044030	mRpS14	141.8143116	-1.05625144	0.300453374	-3.515525303	0.000438885	0.002060922
FBgn0021761	Nup154	32.78341084	0.923915593	0.262958881	3.513536378	0.000442184	0.002075313
FBgn0003137	Ppn	18.74673911	1.301214443	0.370420734	3.512801318	0.000443409	0.002078861
FBgn0039600	CG1646	67.98219179	0.806871808	0.229691376	3.512852	0.000443324	0.002078861
FBgn0033465	Etf-QO	253.8326509	-0.434465901	0.123716596	-3.511783505	0.00044511	0.002085734
FBgn0025525	bab2	156.6761361	0.716889414	0.20426724	3.509566256	0.000448838	0.002101385
FBgn0039169	Spps	6.017605789	1.745134907	0.497258144	3.509514981	0.000448925	0.002101385
FBgn0053094	Synd	265.2495978	0.550821423	0.157015702	3.508065863	0.000451377	0.00211175
FBgn0083962	CG34126	35.76470701	0.70881506	0.202070869	3.507754788	0.000451905	0.002113105
FBgn0051950	CG31950	102.1286973	-1.291289791	0.368183221	-3.507193476	0.00045286	0.002116451
FBgn0032809	CG13078	90.85096558	1.007478425	0.287367008	3.505894536	0.000455075	0.002125685
FBgn0032775	CG17544	514.2600286	-0.424944458	0.121334867	-3.502245203	0.000461355	0.00215388
FBgn0037433	CG17919	27.04712028	-0.826409999	0.235993233	-3.50183769	0.000462061	0.002156041
FBgn0265003	koi	46.36641795	1.264765362	0.361225953	3.501313653	0.000462971	0.002159149
FBgn0026439	Eaat1	85.30827388	-0.982941186	0.280751667	-3.501105428	0.000463333	0.0021597
FBgn0031768	CG12393	77.39100569	-0.514375749	0.146968545	-3.499903666	0.000465426	0.002168319
FBgn0033690	EndoG	49.67911577	-0.667688318	0.19087796	-3.497985412	0.000468787	0.002182827
FBgn0262975	cnc	707.1735534	0.487150308	0.139272176	3.497829364	0.000469061	0.002182957
FBgn0261618	larp	315.6352893	0.486771817	0.139188506	3.497212748	0.000470147	0.002186861
FBgn0028916	CG33090	46.81514925	-0.787728864	0.225263013	-3.496929456	0.000470646	0.002188036
FBgn0037620	ranshi	14.77891799	-1.171869242	0.335304953	-3.494935677	0.000474176	0.00220329
FBgn0000326	clt	59.21245051	-0.747242896	0.213847613	-3.494277472	0.000475347	0.002207572
FBgn0033075	Pld	112.2491123	0.858067375	0.245580542	3.494036494	0.000475776	0.002208408
FBgn0029121	Sras	93.95647823	-0.628623724	0.179938635	-3.493545028	0.000476653	0.002211319
FBgn0036728	UQCR-Q	456.3146503	-0.441408088	0.126415254	-3.491731197	0.000479901	0.002225224
FBgn0040069	vanin-like	301.0386434	-0.949237199	0.271865066	-3.491574743	0.000480182	0.002225363
FBgn0042135	CG18812	247.0884625	0.643942968	0.184441513	3.491312551	0.000480654	0.002226383
FBgn0010341	Cdc42	509.0257543	0.330233654	0.094595506	3.491007858	0.000481202	0.00222776
FBgn0033669	PI31	68.68056373	-0.541848951	0.15524492	-3.490284586	0.000482506	0.002232632
FBgn0013692	mt:tRNA:Glu-TTC	6.789972749	-1.817174033	0.520680509	-3.48999819	0.000483024	0.002232694
FBgn0029525	CG18273	44.62059427	0.727755488	0.208518594	3.49012275	0.000482799	0.002232694
FBgn0024811	Crk	162.2512731	-0.472641052	0.135563656	-3.486487943	0.000489407	0.002261022
FBgn0030292	CG11752	289.4938154	-0.588959354	0.169055324	-3.483826133	0.0004943	0.002282437
FBgn0030329	prtp	429.8562972	-0.469985335	0.134928274	-3.483223488	0.000495415	0.00228639
FBgn0033810	CG4646	51.96945037	-0.972880339	0.279444468	-3.481480045	0.000498651	0.002300128
FBgn0261268	Cul3	41.51136314	0.905362326	0.260093402	3.48091231	0.000499709	0.00230381
FBgn0040208	Kat60	38.41223865	0.747410317	0.214751477	3.480350069	0.000500759	0.00230745
FBgn0002774	mle	110.435341	0.431529939	0.124033498	3.479140294	0.000503025	0.002314991
FBgn0024806	DIP2	18.04606402	1.040730189	0.299126346	3.479232785	0.000502852	0.002314991
FBgn0028693	Rpn12	249.2740594	-0.692764927	0.199124277	-3.479058093	0.000503179	0.002314991
FBgn0014020	Rho1	984.2655831	0.484970382	0.139491359	3.476705555	0.000507615	0.002334186
FBgn0266377	Pde8	112.5719223	0.613736338	0.176549493	3.476284903	0.000508412	0.002336638
FBgn0039766	CG15536	40.93100915	-0.91034083	0.261917965	-3.475671597	0.000509576	0.002340773
FBgn0032595	CG17996	183.5073522	-0.82253967	0.236666552	-3.475521417	0.000509861	0.002340871
FBgn0022213	Cas	50.82846488	0.76968853	0.221472361	3.475325432	0.000510234	0.002341369
FBgn0028342	ATPsyndelta	894.9983662	-0.843210115	0.242739296	-3.473727284	0.000513282	0.002354139
FBgn0026083	tyf	162.3564207	0.661642173	0.190515116	3.472911692	0.000514845	0.002359942
FBgn0037917	wkd	87.78334435	0.541808627	0.156015425	3.472788839	0.00051508	0.002359942
FBgn0039214	puf	54.74044371	1.06130245	0.305673137	3.472017401	0.000516563	0.002365511
FBgn0039305	CG11858	67.73749092	-0.839441536	0.241801779	-3.471610253	0.000517347	0.002367877
FBgn0033100	CG3420	186.3816959	-0.731594036	0.21080335	-3.470504788	0.000519481	0.002375192
FBgn0036556	CG5830	265.8842024	0.758195201	0.218461941	3.470605435	0.000519286	0.002375192
FBgn0035271	CG2021	54.66121173	-0.744013068	0.214497422	-3.468634081	0.000523111	0.002390557
FBgn0034975	enok	13.79829103	1.24074239	0.357777403	3.467917148	0.000524509	0.002395708
FBgn0013701	mt:tRNA:Asn-GTT	22.48969921	-1.497713248	0.432156405	-3.46567407	0.000528904	0.002414538
FBgn0038196	CG9922	213.9905534	-0.712323601	0.205752408	-3.462042597	0.000536092	0.002446094
FBgn0051472	sgll	440.9315071	-0.76606086	0.221333974	-3.461108321	0.000537956	0.002453335
FBgn0039678	Obp99a	1.634635294	-3.887594983	1.123649421	-3.459793518	0.00054059	0.002464077
FBgn0037146	CG7470	4687.831049	-0.367017473	0.106132835	-3.458095453	0.000544009	0.002478386
FBgn0267336	Glut4EF	424.2652665	0.744121446	0.215256403	3.456907365	0.000546413	0.002488059
FBgn0031461	daw	13.54751539	-1.275102245	0.369097452	-3.454649275	0.000551009	0.0025077
FBgn0004435	Galphaq	66.54087133	0.789199605	0.228458197	3.454459564	0.000551397	0.002508177
FBgn0004595	pros	21.16038391	0.960083065	0.277947516	3.454188331	0.000551952	0.002509412
FBgn0086694	Bre1	27.09022324	0.929782513	0.269211973	3.453719026	0.000552913	0.002512494
FBgn0243514	eater	1.383749207	3.630166015	1.051189218	3.453389697	0.000553589	0.002514274
FBgn0034970	yki	65.41040555	0.5866516	0.169903669	3.45284834	0.000554701	0.002518035
FBgn0032482	Pect	212.3740562	0.471301758	0.136516645	3.452339149	0.000555749	0.002520801
FBgn0051111	CG31111	12.23450681	-1.356126434	0.392836706	-3.452137777	0.000556164	0.002520801
FBgn0051548	CG31548	241.4334013	-0.617347962	0.178824464	-3.452256746	0.000555918	0.002520801
FBgn0085453	CG34424	49.67130201	-0.832049732	0.241101809	-3.451030648	0.00055845	0.002529871
FBgn0033208	mRpL52	73.89070415	-0.92152458	0.267080466	-3.450363079	0.000559833	0.002534839
FBgn0037108	CG11306	101.1285015	-0.589404666	0.1708407	-3.450024877	0.000560535	0.002536721
FBgn0039685	Obp99b	3.93914966	-3.668060049	1.063294076	-3.449713612	0.000561182	0.002538351
FBgn0262844	CG43208	46.03286265	-1.214976547	0.352248128	-3.449206539	0.000562236	0.002541825
FBgn0040623	Spase12	750.2576831	-0.812094285	0.235489318	-3.448539806	0.000563626	0.002546809
FBgn0027088	GlyRS	104.6509813	0.576684271	0.167249518	3.448047429	0.000564655	0.002550156
FBgn0265045	Strn-Mlck	31.8644281	0.977426775	0.283521793	3.447448481	0.000565908	0.002554515
FBgn0029594	CG14806	138.2366375	-0.522123656	0.151503727	-3.446275991	0.00056837	0.002564319
FBgn0037880	CG17726	52.83004471	-0.715655242	0.207671412	-3.446094175	0.000568752	0.002564739
FBgn0267330	KdelR	542.1161399	-0.431627783	0.125268168	-3.445630215	0.000569729	0.002567839
FBgn0002354	l(3)87Df	71.62612141	-0.603035881	0.175114457	-3.44366702	0.000573882	0.002585241
FBgn0030099	CG12056	84.90625017	-0.842000909	0.244603558	-3.442308511	0.000576772	0.002594466
FBgn0031850	Tsp	5.975713503	1.891096781	0.549371474	3.442291547	0.000576808	0.002594466
FBgn0039723	CG15522	5.075362864	-1.780454432	0.51719171	-3.442542478	0.000576273	0.002594466
FBgn0032402	CG14945	11.23485686	1.390459022	0.404018681	3.441571112	0.000578346	0.002600065
FBgn0013763	Idgf6	26.85634474	0.81065173	0.235636805	3.440259381	0.000581157	0.002611306
FBgn0030007	alpha-PheRS	131.872105	-0.502528618	0.146078411	-3.440129285	0.000581436	0.002611306
FBgn0030263	CG2076	520.7212071	-0.491280858	0.142866086	-3.438750728	0.000584405	0.00262232
FBgn0036118	Blos2	90.10187347	-1.025467426	0.298212324	-3.438715787	0.000584481	0.00262232
FBgn0031417	CG3597	19.67111174	-1.204990092	0.350524744	-3.437674838	0.000586732	0.002631088
FBgn0033787	CG13321	5070.180983	-0.606004182	0.176366219	-3.436055865	0.000590249	0.002645523
FBgn0032014	CG7840	53.60086322	-0.90230451	0.262718684	-3.434489304	0.000593672	0.002659516
FBgn0039092	CG16723	15.18575451	-1.12167756	0.32673834	-3.432953593	0.000597044	0.002673274
FBgn0000463	Dl	25.44977049	0.939734748	0.273863967	3.431392447	0.000600491	0.00268735
FBgn0039112	SdhD	662.9400887	-0.551387143	0.160765529	-3.429759753	0.000604116	0.002702206
FBgn0035024	CG11414	73.18543212	0.546980964	0.159498596	3.429377931	0.000604966	0.002704646
FBgn0015269	Nf1	6.999305455	1.578951444	0.460692477	3.427343669	0.000609517	0.002722244
FBgn0035205	CG2469	53.11729654	0.618752285	0.180530383	3.427413577	0.00060936	0.002722244
FBgn0040398	CG14629	409.0020897	-0.477401808	0.139350386	-3.42590948	0.000612745	0.002735279
FBgn0019990	Gcn2	13.27205467	1.13303643	0.331030865	3.422751625	0.000619907	0.002765859
FBgn0033814	CG4670	269.8214412	-0.531510788	0.155313098	-3.422189069	0.000621191	0.002770193
FBgn0027611	LManII	686.7626553	0.837492196	0.245075205	3.417286529	0.000632487	0.002819147
FBgn0085442	NKAIN	74.27728728	0.816074024	0.239028775	3.414124619	0.000639873	0.002850636
FBgn0052350	Vps11	27.08887499	-0.989404606	0.289827629	-3.413769102	0.000640709	0.002852924
FBgn0259234	Camta	14.03370006	1.35393409	0.39730476	3.407797302	0.000654895	0.002914629
FBgn0261988	Gprk2	93.13734415	0.898565899	0.263751456	3.406866124	0.000657134	0.002923122
FBgn0001234	Hsromega	550.3071073	0.963554686	0.282842259	3.406685731	0.000657568	0.002923587
FBgn0030800	Nprl2	71.46466959	-0.589082754	0.172937909	-3.406325183	0.000658437	0.002925983
FBgn0024994	Csat	101.8308741	-0.544433497	0.159839016	-3.40613644	0.000658892	0.002926539
FBgn0266918	CG32486	109.638462	0.873080435	0.256402357	3.405118604	0.000661353	0.002935997
FBgn0052296	Mrtf	106.754481	0.574398059	0.168737523	3.404092038	0.000663844	0.002945578
FBgn0032701	CG10341	34.43505456	0.91551039	0.268989855	3.40351271	0.000665253	0.002947425
FBgn0039115	CG10214	38.72581418	0.705767702	0.207364615	3.403510785	0.000665258	0.002947425
[truncated: 7,616 more rows]
