# Supplementary material for: Multiscale analysis reveals that diet-dependent midgut plasticity emerges from alterations in both stem cell niche coupling and enterocyte size
Source: eLife. 2021 Sep 23;10:e64125. doi: 10.7554/eLife.64125 (PMC8528489; doi:10.7554/eLife.64125)
Supplement: Figure 5—source data 5. [file elife-64125-fig5-data5.csv]

Cross	Repeat	Male Line	Treatment	Total.PH3
EsgTsX64195	1	Ras85DV12	HS	50
EsgTsX64195	1	Ras85DV12	HS	98
EsgTsX64195	1	Ras85DV12	HS	68
EsgTsX64195	1	Ras85DV12	HS	42
EsgTsX64195	1	Ras85DV12	HS	72
EsgTsX64195	1	Ras85DV12	HS	64
EsgTsX64195	1	Ras85DV12	HS	73
EsgTsX64195	1	Ras85DV12	HS	56
EsgTsX64195	1	Ras85DV12	HS	55
EsgTsX64195	1	Ras85DV12	HY	52
EsgTsX64195	1	Ras85DV12	HY	40
EsgTsX64195	1	Ras85DV12	HY	63
EsgTsX64195	1	Ras85DV12	HY	48
EsgTsX64195	1	Ras85DV12	HY	75
EsgTsX64195	1	Ras85DV12	HY	65
EsgTsX64195	1	Ras85DV12	HY	80
EsgTsX64195	1	Ras85DV12	HY	91
EsgTsX64195	1	Ras85DV12	HY	77
EsgTsXControl	1	Control	HS	0
EsgTsXControl	1	Control	HS	5
EsgTsXControl	1	Control	HS	13
EsgTsXControl	1	Control	HS	1
EsgTsXControl	1	Control	HS	14
EsgTsXControl	1	Control	HS	0
EsgTsXControl	1	Control	HS	31
EsgTsXControl	1	Control	HS	31
EsgTsXControl	1	Control	HS	18
EsgTsXControl	1	Control	HS	8
EsgTsXControl	1	Control	HY	13
EsgTsXControl	1	Control	HY	12
EsgTsXControl	1	Control	HY	3
EsgTsXControl	1	Control	HY	16
EsgTsXControl	1	Control	HY	3
EsgTsXControl	1	Control	HY	14
EsgTsXControl	1	Control	HY	1
EsgTsXControl	1	Control	HY	13
EsgTsXControl	1	Control	HY	7
EsgTsXControl	1	Control	HY	32
EsgTsXControl	2	Control	HS	0
EsgTsXControl	2	Control	HS	2
EsgTsXControl	2	Control	HS	4
EsgTsXControl	2	Control	HS	1
EsgTsXControl	2	Control	HS	1
EsgTsXControl	2	Control	HS	1
EsgTsXControl	2	Control	HS	4
EsgTsXControl	2	Control	HS	0
EsgTsXControl	2	Control	HS	5
EsgTsXControl	2	Control	HY	0
EsgTsXControl	2	Control	HY	0
EsgTsXControl	2	Control	HY	0
EsgTsXControl	2	Control	HY	1
EsgTsXControl	2	Control	HY	0
EsgTsXControl	2	Control	HY	1
EsgTsXControl	2	Control	HY	7
EsgTsX64195	2	Ras85DV12	HS	61
EsgTsX64195	2	Ras85DV12	HS	53
EsgTsX64195	2	Ras85DV12	HS	46
EsgTsX64195	2	Ras85DV12	HS	93
EsgTsX64195	2	Ras85DV12	HS	73
EsgTsX64195	2	Ras85DV12	HS	63
EsgTsX64195	2	Ras85DV12	HS	51
EsgTsX64195	2	Ras85DV12	HS	64
EsgTsX64195	2	Ras85DV12	HS	71
EsgTsX64195	2	Ras85DV12	HS	70
EsgTsX64195	2	Ras85DV12	HY	54
EsgTsX64195	2	Ras85DV12	HY	59
EsgTsX64195	2	Ras85DV12	HY	81
EsgTsX64195	2	Ras85DV12	HY	56
EsgTsX64195	2	Ras85DV12	HY	56
EsgTsX64195	2	Ras85DV12	HY	52
EsgTsX64195	2	Ras85DV12	HY	62
EsgTsXControl	3	Control	HY	5
EsgTsXControl	3	Control	HY	0
EsgTsXControl	3	Control	HY	0
EsgTsXControl	3	Control	HY	4
EsgTsXControl	3	Control	HY	2
EsgTsXControl	3	Control	HY	14
EsgTsXControl	3	Control	HY	5
EsgTsXControl	3	Control	HY	8
EsgTsXControl	3	Control	HY	3
EsgTsXControl	3	Control	HS	16
EsgTsXControl	3	Control	HS	2
EsgTsXControl	3	Control	HS	0
EsgTsXControl	3	Control	HS	2
EsgTsXControl	3	Control	HS	4
EsgTsXControl	3	Control	HS	10
EsgTsXControl	3	Control	HS	9
EsgTsXControl	3	Control	HS	3
EsgTsXControl	3	Control	HS	31
EsgTsXControl	4	Control	HY	2
EsgTsXControl	4	Control	HY	1
EsgTsXControl	4	Control	HY	2
EsgTsXControl	4	Control	HY	1
EsgTsXControl	4	Control	HY	2
EsgTsXControl	4	Control	HY	2
EsgTsXControl	4	Control	HY	10
EsgTsXControl	4	Control	HY	28
EsgTsXControl	4	Control	HY	1
EsgTsXControl	4	Control	HS	6
EsgTsXControl	4	Control	HS	2
EsgTsXControl	4	Control	HS	1
EsgTsXControl	4	Control	HS	9
EsgTsXControl	4	Control	HS	0
EsgTsXControl	4	Control	HS	0
EsgTsXControl	4	Control	HS	1
EsgTsXControl	4	Control	HS	2
EsgTsXControl	4	Control	HS	2
EsgTsXControl	4	Control	HS	5
EsgTsX64195	3	Ras85DV12	HY	63
EsgTsX64195	3	Ras85DV12	HY	87
EsgTsX64195	3	Ras85DV12	HY	64
EsgTsX64195	3	Ras85DV12	HY	48
EsgTsX64195	3	Ras85DV12	HY	42
EsgTsX64195	3	Ras85DV12	HY	27
EsgTsX64195	3	Ras85DV12	HY	54
EsgTsX64195	3	Ras85DV12	HY	56
EsgTsX64195	3	Ras85DV12	HY	49
EsgTsX64195	3	Ras85DV12	HS	37
EsgTsX64195	3	Ras85DV12	HS	54
EsgTsX64195	3	Ras85DV12	HS	45
EsgTsX64195	3	Ras85DV12	HS	50
EsgTsX64195	3	Ras85DV12	HS	29
EsgTsX64195	3	Ras85DV12	HS	22
EsgTsX64195	3	Ras85DV12	HS	47
EsgTsX64195	3	Ras85DV12	HS	35
EsgTsX64195	3	Ras85DV12	HS	53
EsgTsX64195	3	Ras85DV12	HS	27
EsgTsXTorDER	3	TorDER	HY	34
EsgTsXTorDER	3	TorDER	HY	58
EsgTsXTorDER	3	TorDER	HY	53
EsgTsXTorDER	3	TorDER	HY	42
EsgTsXTorDER	3	TorDER	HY	47
EsgTsXTorDER	3	TorDER	HY	48
EsgTsXTorDER	3	TorDER	HY	41
EsgTsXTorDER	3	TorDER	HY	56
EsgTsXTorDER	3	TorDER	HY	51
EsgTsXTorDER	3	TorDER	HS	33
EsgTsXTorDER	3	TorDER	HS	69
EsgTsXTorDER	3	TorDER	HS	32
EsgTsXTorDER	3	TorDER	HS	14
EsgTsXTorDER	3	TorDER	HS	21
EsgTsXTorDER	3	TorDER	HS	40
EsgTsXTorDER	3	TorDER	HS	11
EsgTsXTorDER	3	TorDER	HS	25
EsgTsXTorDER	4	TorDER	HY	49
EsgTsXTorDER	4	TorDER	HY	51
EsgTsXTorDER	4	TorDER	HY	35
EsgTsXTorDER	4	TorDER	HY	86
EsgTsXTorDER	4	TorDER	HY	46
EsgTsXTorDER	4	TorDER	HY	78
EsgTsXTorDER	4	TorDER	HY	50
EsgTsXTorDER	4	TorDER	HY	48
EsgTsXTorDER	4	TorDER	HY	61
EsgTsXTorDER	4	TorDER	HS	60
EsgTsXTorDER	4	TorDER	HS	35
EsgTsXTorDER	4	TorDER	HS	57
EsgTsXTorDER	4	TorDER	HS	42
EsgTsXTorDER	4	TorDER	HS	93
EsgTsXTorDER	4	TorDER	HS	70
EsgTsXTorDER	4	TorDER	HS	54
EsgTsXTorDER	4	TorDER	HS	37
EsgTsX64195	4	Ras85DV12	HY	21
EsgTsX64195	4	Ras85DV12	HY	28
EsgTsX64195	4	Ras85DV12	HY	56
EsgTsX64195	4	Ras85DV12	HY	58
EsgTsX64195	4	Ras85DV12	HY	40
EsgTsX64195	4	Ras85DV12	HY	34
EsgTsX64195	4	Ras85DV12	HY	31
EsgTsX64195	4	Ras85DV12	HY	25
EsgTsX64195	4	Ras85DV12	HY	21
EsgTsX64195	4	Ras85DV12	HY	36
EsgTsX64195	4	Ras85DV12	HS	50
EsgTsX64195	4	Ras85DV12	HS	14
EsgTsX64195	4	Ras85DV12	HS	46
EsgTsX64195	4	Ras85DV12	HS	29
EsgTsX64195	4	Ras85DV12	HS	33
EsgTsX64195	4	Ras85DV12	HS	32
EsgTsX64195	4	Ras85DV12	HS	33
EsgTsX64195	4	Ras85DV12	HS	26
EsgTsXTorDER	5	TorDER	HS	43
EsgTsXTorDER	5	TorDER	HS	41
EsgTsXTorDER	5	TorDER	HS	28
EsgTsXTorDER	5	TorDER	HS	36
EsgTsXTorDER	5	TorDER	HS	16
EsgTsXTorDER	5	TorDER	HS	22
EsgTsXTorDER	5	TorDER	HS	36
EsgTsXTorDER	5	TorDER	HS	28
EsgTsXTorDER	5	TorDER	HS	28
EsgTsX64195	5	Ras85DV12	HS	39
EsgTsX64195	5	Ras85DV12	HS	47
EsgTsX64195	5	Ras85DV12	HS	53
EsgTsX64195	5	Ras85DV12	HS	49
EsgTsX64195	5	Ras85DV12	HS	55
EsgTsX64195	5	Ras85DV12	HS	49
EsgTsX64195	5	Ras85DV12	HS	62
EsgTsX64195	5	Ras85DV12	HS	40
EsgTsX64195	5	Ras85DV12	HS	32
EsgTsX64195	5	Ras85DV12	HS	73
EsgTsXTorDER	5	TorDER	HY	49
EsgTsXTorDER	5	TorDER	HY	24
EsgTsXTorDER	5	TorDER	HY	34
EsgTsXTorDER	5	TorDER	HY	28
EsgTsXTorDER	5	TorDER	HY	60
EsgTsXTorDER	5	TorDER	HY	26
EsgTsXTorDER	5	TorDER	HY	25
EsgTsXTorDER	5	TorDER	HY	30
EsgTsXTorDER	5	TorDER	HY	12
EsgTsXTorDER	5	TorDER	HY	21
EsgTsX64195	5	Ras85DV12	HY	34
EsgTsX64195	5	Ras85DV12	HY	61
EsgTsX64195	5	Ras85DV12	HY	48
EsgTsX64195	5	Ras85DV12	HY	48
EsgTsX64195	5	Ras85DV12	HY	59
EsgTsX64195	5	Ras85DV12	HY	35
EsgTsX64195	5	Ras85DV12	HY	60
EsgTsX64195	5	Ras85DV12	HY	64
EsgTsX64195	5	Ras85DV12	HY	46
EsgTsX64195	5	Ras85DV12	HY	50
EsgTsXControl	5	Control	HS	0
EsgTsXControl	5	Control	HS	1
EsgTsXControl	5	Control	HS	0
EsgTsXControl	5	Control	HS	1
EsgTsXControl	5	Control	HS	2
EsgTsXControl	5	Control	HS	0
EsgTsXControl	5	Control	HS	1
EsgTsXControl	5	Control	HS	0
EsgTsXControl	5	Control	HS	0
EsgTsXControl	5	Control	HY	0
EsgTsXControl	5	Control	HY	1
EsgTsXControl	5	Control	HY	0
EsgTsXControl	5	Control	HY	1
EsgTsXControl	5	Control	HY	1
EsgTsXControl	5	Control	HY	0
EsgTsXControl	5	Control	HY	1
EsgTsXControl	5	Control	HY	0
EsgTsXControl	5	Control	HY	3
