# Supplementary material for: Multiscale analysis reveals that diet-dependent midgut plasticity emerges from alterations in both stem cell niche coupling and enterocyte size
Source: eLife. 2021 Sep 23;10:e64125. doi: 10.7554/eLife.64125 (PMC8528489; doi:10.7554/eLife.64125)
Supplement: Figure 5—source data 6. [file elife-64125-fig5-data6.csv]

Repeat	Female Line	Male Line	Treatment	Total.PH3
1	Myo	upd3-OE	HS	12
1	Myo	upd3-OE	HS	17
1	Myo	upd3-OE	HS	30
1	Myo	upd3-OE	HS	14
1	Myo	upd3-OE	HS	17
1	Myo	upd3-OE	HS	30
1	Myo	upd3-OE	HS	29
1	Myo	upd3-OE	HS	30
1	Myo	Control	HS	39
2	Myo	Control	HS	32
1	Myo	Control	HS	20
1	Myo	Control	HS	18
1	Myo	Control	HS	18
3	Myo	Control	HS	18
2	Myo	Control	HS	17
1	Myo	upd3-OE	HY	97
1	Myo	upd3-OE	HY	125
1	Myo	upd3-OE	HY	91
1	Myo	upd3-OE	HY	97
1	Myo	upd3-OE	HY	90
1	Myo	upd3-OE	HY	127
1	Myo	upd3-OE	HY	78
1	Myo	upd3-OE	HY	85
1	Myo	upd3-OE	HY	95
1	Myo	Control	HY	23
1	Myo	Control	HY	14
1	Myo	Control	HY	19
1	Myo	Control	HY	12
1	Myo	Control	HY	7
1	Myo	Control	HY	26
1	Myo	Control	HY	11
1	Myo	Control	HY	17
1	Myo	Control	HY	18
1	Myo	Control	HY	11
1	Myo	spi-SEC	HS	1
1	Myo	spi-SEC	HS	3
1	Myo	spi-SEC	HS	3
1	Myo	spi-SEC	HS	4
1	Myo	spi-SEC	HS	4
1	Myo	spi-SEC	HS	1
1	Myo	spi-SEC	HS	6
1	Myo	spi-SEC	HS	0
1	Myo	spi-SEC	HS	3
1	Myo	spi-SEC	HS	7
1	Myo	spi-SEC	HY	71
1	Myo	spi-SEC	HY	6
1	Myo	spi-SEC	HY	12
1	Myo	spi-SEC	HY	35
1	Myo	spi-SEC	HY	25
1	Myo	spi-SEC	HY	36
1	Myo	spi-SEC	HY	21
1	Myo	spi-SEC	HY	5
1	Myo	spi-SEC	HY	23
1	Myo	spi-SEC	HY	93
2	Myo	Control	HS	15
2	Myo	Control	HS	13
3	Myo	Control	HS	13
2	Myo	Control	HS	12
1	Myo	Control	HS	10
1	Myo	Control	HS	8
2	Myo	Control	HS	8
2	Myo	Control	HS	7
2	Myo	Control	HS	7
1	Myo	Control	HS	5
2	Myo	Control	HY	9
2	Myo	Control	HY	8
2	Myo	Control	HY	6
2	Myo	Control	HY	8
2	Myo	Control	HY	11
2	Myo	Control	HY	9
2	Myo	Control	HY	24
2	Myo	Control	HY	9
2	Myo	upd3-OE	HS	22
2	Myo	upd3-OE	HS	33
2	Myo	upd3-OE	HS	30
2	Myo	upd3-OE	HS	20
2	Myo	upd3-OE	HS	19
2	Myo	upd3-OE	HS	21
2	Myo	upd3-OE	HS	36
2	Myo	upd3-OE	HS	25
2	Myo	upd3-OE	HS	13
2	Myo	upd3-OE	HY	82
2	Myo	upd3-OE	HY	89
2	Myo	upd3-OE	HY	77
2	Myo	upd3-OE	HY	85
2	Myo	upd3-OE	HY	98
2	Myo	upd3-OE	HY	84
2	Myo	upd3-OE	HY	86
2	Myo	upd3-OE	HY	81
2	Myo	upd3-OE	HY	89
2	Myo	spi-SEC	HS	11
2	Myo	spi-SEC	HS	14
2	Myo	spi-SEC	HS	24
2	Myo	spi-SEC	HS	17
2	Myo	spi-SEC	HS	18
2	Myo	spi-SEC	HY	7
2	Myo	spi-SEC	HY	20
2	Myo	spi-SEC	HY	6
2	Myo	spi-SEC	HY	85
2	Myo	spi-SEC	HY	62
2	Myo	spi-SEC	HY	30
2	Myo	spi-SEC	HY	28
2	Myo	spi-SEC	HY	20
2	Myo	spi-SEC	HY	19
2	Myo	spi-SEC	HY	133
2	Myo	Control	HS	5
3	Myo	Control	HS	4
1	Myo	Control	HS	3
1	Myo	Control	HS	3
2	Myo	Control	HS	0
3	Myo	Control	HY	7
3	Myo	Control	HY	5
3	Myo	Control	HY	7
3	Myo	upd3-OE	HS	30
3	Myo	upd3-OE	HS	15
3	Myo	upd3-OE	HS	33
3	Myo	upd3-OE	HS	17
3	Myo	upd3-OE	HS	17
3	Myo	upd3-OE	HS	47
3	Myo	upd3-OE	HS	16
3	Myo	upd3-OE	HS	17
3	Myo	upd3-OE	HS	52
3	Myo	upd3-OE	HY	105
3	Myo	upd3-OE	HY	65
3	Myo	upd3-OE	HY	59
3	Myo	upd3-OE	HY	33
3	Myo	upd3-OE	HY	70
3	Myo	upd3-OE	HY	57
3	Myo	upd3-OE	HY	67
3	Myo	upd3-OE	HY	47
3	Myo	spi-SEC	HS	11
3	Myo	spi-SEC	HS	4
3	Myo	spi-SEC	HS	19
3	Myo	spi-SEC	HS	25
3	Myo	spi-SEC	HS	7
3	Myo	spi-SEC	HS	15
3	Myo	spi-SEC	HS	13
3	Myo	spi-SEC	HY	23
3	Myo	spi-SEC	HY	106
3	Myo	spi-SEC	HY	22
3	Myo	spi-SEC	HY	14
3	Myo	spi-SEC	HY	22
3	Myo	spi-SEC	HY	21
