# Supplementary material for: Multiscale analysis reveals that diet-dependent midgut plasticity emerges from alterations in both stem cell niche coupling and enterocyte size
Source: eLife. 2021 Sep 23;10:e64125. doi: 10.7554/eLife.64125 (PMC8528489; doi:10.7554/eLife.64125)
Supplement: Figure 5—source data 7. [file elife-64125-fig5-data7.csv]

Line	Repeat	Diet	Region	Mean
CantonS	2	HS	4	5.421
CantonS	2	HS	4	7.371
CantonS	2	HS	4	8.842
CantonS	2	HS	4	4.555
CantonS	2	HS	4	10.228
CantonS	2	HS	4	12.699
CantonS	3	HS	4	2.934
CantonS	3	HS	4	7.591
CantonS	3	HS	4	4.258
CantonS	3	HS	4	9.945
CantonS	3	HS	4	3.534
CantonS	3	HS	4	4.411
CantonS	3	HS	4	6.61
CantonS	1	HS	4	5.349
CantonS	1	HS	4	14.2
CantonS	1	HS	4	3.784
CantonS	1	HS	4	5.009
CantonS	1	HS	4	6.745
CantonS	1	HS	4	11.37
CantonS	1	HS	4	8.211
CantonS	1	HS	4	4.803
CantonS	2	HY	4	18.491
CantonS	2	HY	4	3.055
CantonS	2	HY	4	27.653
CantonS	2	HY	4	13.074
CantonS	3	HY	4	30.968
CantonS	3	HY	4	9.361
CantonS	3	HY	4	9.251
CantonS	3	HY	4	10.019
CantonS	3	HY	4	12.954
CantonS	1	HY	4	11.166
CantonS	1	HY	4	28.933
CantonS	1	HY	4	37.992
CantonS	1	HY	4	26.884
CantonS	1	HY	4	26.63
CantonS	1	HY	4	44.306
CantonS	1	HY	4	4.187
CantonS	1	HY	4	24.89
