# Supplementary material for: Multiscale analysis reveals that diet-dependent midgut plasticity emerges from alterations in both stem cell niche coupling and enterocyte size
Source: eLife. 2021 Sep 23;10:e64125. doi: 10.7554/eLife.64125 (PMC8528489; doi:10.7554/eLife.64125)
Supplement: Figure 5—source data 8. [file elife-64125-fig5-data8.csv]

Line	Repeat	Diet	Region	Mean
CantonS	2	HS	4	107.102
CantonS	2	HS	4	38.674
CantonS	2	HS	4	57.684
CantonS	2	HS	4	50.039
CantonS	3	HS	4	120.871
CantonS	3	HS	4	98.439
CantonS	3	HS	4	64.974
CantonS	3	HS	4	125.985
CantonS	1	HS	4	78.569
CantonS	1	HS	4	107.564
CantonS	1	HS	4	121.566
CantonS	1	HS	4	34.376
CantonS	3	HY	4	49.277
CantonS	3	HY	4	22.206
CantonS	3	HY	4	27.358
CantonS	3	HY	4	59.595
CantonS	1	HY	4	24.5
CantonS	1	HY	4	17.514
CantonS	1	HY	4	41.927
CantonS	1	HY	4	46.76
CantonS	1	HY	4	16.84
CantonS	2	HY	4	23.562
CantonS	2	HY	4	63.551
CantonS	2	HY	4	16.424
CantonS	2	HY	4	45.421
CantonS	2	HY	4	52.949
CantonS	2	HY	4	41.987
CantonS	2	HY	4	50.231
CantonS	2	HY	4	59.248
