# Supplementary material for: Multiscale analysis reveals that diet-dependent midgut plasticity emerges from alterations in both stem cell niche coupling and enterocyte size
Source: eLife. 2021 Sep 23;10:e64125. doi: 10.7554/eLife.64125 (PMC8528489; doi:10.7554/eLife.64125)
Supplement: Figure 5—source data 9. [file elife-64125-fig5-data9.csv]

Female.Line	Phase	Repeat	Dietold	Diet1	Day	Diet	Group	C.G	Male.Line.ID	Male.Line	Gene	Total.PH3
Act	2	1	HS	HStoHS	7	HStoHS D7	7	HS	32371	Ampk-IR	AmpK	3
Act	2	1	HS	HStoHS	7	HStoHS D7	7	HS	32371	Ampk-IR	AmpK	7
Act	2	1	HS	HStoHS	7	HStoHS D7	7	HS	32371	Ampk-IR	AmpK	11
Act	2	1	HS	HStoHS	7	HStoHS D7	7	HS	32371	Ampk-IR	AmpK	6
Act	2	1	HS	HStoHS	7	HStoHS D7	7	HS	32371	Ampk-IR	AmpK	10
Act	2	1	HS	HStoHS	7	HStoHS D7	7	HS	32371	Ampk-IR	AmpK	8
Act	2	1	HS	HStoHS	7	HStoHS D7	7	HS	67215	Gcn2-IR	Gcn2	19
Act	2	1	HS	HStoHS	7	HStoHS D7	7	HS	67215	Gcn2-IR	Gcn2	11
Act	2	1	HS	HStoHS	7	HStoHS D7	7	HS	67215	Gcn2-IR	Gcn2	8
Act	2	1	HS	HStoHS	7	HStoHS D7	7	HS	67215	Gcn2-IR	Gcn2	21
Act	2	1	HS	HStoHS	7	HStoHS D7	7	HS	67215	Gcn2-IR	Gcn2	40
Act	2	1	HS	HStoHS	7	HStoHS D7	7	HS	67215	Gcn2-IR	Gcn2	13
Act	2	1	HS	HStoHS	7	HStoHS D7	7	HS	67215	Gcn2-IR	Gcn2	7
Act	2	1	HS	HStoHS	7	HStoHS D7	7	HS	60003	Lk6-IR	Lk6	11
Act	2	1	HS	HStoHS	7	HStoHS D7	7	HS	60003	Lk6-IR	Lk6	22
Act	2	1	HS	HStoHS	7	HStoHS D7	7	HS	60003	Lk6-IR	Lk6	59
Act	2	1	HS	HStoHS	7	HStoHS D7	7	HS	60003	Lk6-IR	Lk6	24
Act	2	1	HS	HStoHS	7	HStoHS D7	7	HS	60003	Lk6-IR	Lk6	15
Act	2	1	HS	HStoHS	7	HStoHS D7	7	HS	60003	Lk6-IR	Lk6	21
Act	2	1	HS	HStoHS	7	HStoHS D7	7	HS	60003	Lk6-IR	Lk6	14
Act	2	1	HS	HStoHS	7	HStoHS D7	7	HS	60003	Lk6-IR	Lk6	16
Act	2	1	HS	HStoHS	7	HStoHS D7	7	HS	42499	PEK-IR	PEK	3
Act	2	1	HS	HStoHS	7	HStoHS D7	7	HS	42499	PEK-IR	PEK	6
Act	2	1	HS	HStoHS	7	HStoHS D7	7	HS	42499	PEK-IR	PEK	3
Act	2	1	HS	HStoHS	7	HStoHS D7	7	HS	42499	PEK-IR	PEK	10
Act	2	1	HS	HStoHS	7	HStoHS D7	7	HS	42499	PEK-IR	PEK	2
Act	2	1	HS	HStoHS	7	HStoHS D7	7	HS	42499	PEK-IR	PEK	18
Act	2	1	HS	HStoHS	7	HStoHS D7	7	HS	Cs	Control	Control	6
Act	2	1	HS	HStoHS	7	HStoHS D7	7	HS	Cs	Control	Control	9
Act	2	1	HS	HStoHS	7	HStoHS D7	7	HS	Cs	Control	Control	8
Act	2	1	HS	HStoHS	7	HStoHS D7	7	HS	Cs	Control	Control	16
Act	2	1	HS	HStoHS	7	HStoHS D7	7	HS	Cs	Control	Control	9
Act	2	1	HS	HStoHS	7	HStoHS D7	7	HS	Cs	Control	Control	5
Act	2	1	HS	HStoHS	7	HStoHS D7	7	HS	Cs	Control	Control	7
Act	2	2	HS	HStoHS	7	HStoHS D7	7	HS	Cs	Control	Control	3
Act	2	2	HS	HStoHS	7	HStoHS D7	7	HS	Cs	Control	Control	3
Act	2	2	HS	HStoHS	7	HStoHS D7	7	HS	Cs	Control	Control	1
Act	2	2	HS	HStoHS	7	HStoHS D7	7	HS	Cs	Control	Control	12
Act	2	2	HS	HStoHS	7	HStoHS D7	7	HS	Cs	Control	Control	5
Act	2	2	HS	HStoHS	7	HStoHS D7	7	HS	Cs	Control	Control	7
Act	2	2	HS	HStoHS	7	HStoHS D7	7	HS	Cs	Control	Control	9
Act	2	2	HS	HStoHS	7	HStoHS D7	7	HS	67215	Gcn2-IR	Gcn2	4
Act	2	2	HS	HStoHS	7	HStoHS D7	7	HS	67215	Gcn2-IR	Gcn2	11
Act	2	2	HS	HStoHS	7	HStoHS D7	7	HS	67215	Gcn2-IR	Gcn2	25
Act	2	2	HS	HStoHS	7	HStoHS D7	7	HS	67215	Gcn2-IR	Gcn2	20
Act	2	2	HS	HStoHS	7	HStoHS D7	7	HS	67215	Gcn2-IR	Gcn2	17
Act	2	2	HS	HStoHS	7	HStoHS D7	7	HS	67215	Gcn2-IR	Gcn2	21
Act	2	2	HS	HStoHS	7	HStoHS D7	7	HS	67215	Gcn2-IR	Gcn2	22
Act	2	2	HS	HStoHS	7	HStoHS D7	7	HS	60003	Lk6-IR	Lk6	54
Act	2	2	HS	HStoHS	7	HStoHS D7	7	HS	60003	Lk6-IR	Lk6	46
Act	2	2	HS	HStoHS	7	HStoHS D7	7	HS	60003	Lk6-IR	Lk6	31
Act	2	2	HS	HStoHS	7	HStoHS D7	7	HS	60003	Lk6-IR	Lk6	34
Act	2	2	HS	HStoHS	7	HStoHS D7	7	HS	60003	Lk6-IR	Lk6	38
Act	2	2	HS	HStoHS	7	HStoHS D7	7	HS	42499	PEK-IR	PEK	6
Act	2	2	HS	HStoHS	7	HStoHS D7	7	HS	42499	PEK-IR	PEK	8
Act	2	2	HS	HStoHS	7	HStoHS D7	7	HS	42499	PEK-IR	PEK	8
Act	2	2	HS	HStoHS	7	HStoHS D7	7	HS	42499	PEK-IR	PEK	18
Act	2	2	HS	HStoHS	7	HStoHS D7	7	HS	42499	PEK-IR	PEK	7
Act	2	2	HS	HStoHS	7	HStoHS D7	7	HS	42499	PEK-IR	PEK	6
Act	2	2	HS	HStoHS	7	HStoHS D7	7	HS	42499	PEK-IR	PEK	2
Act	2	2	HS	HStoHS	7	HStoHS D7	7	HS	42499	PEK-IR	PEK	11
Act	2	2	HS	HStoHS	7	HStoHS D7	7	HS	42499	PEK-IR	PEK	10
Act	2	2	HS	HStoHS	7	HStoHS D7	7	HS	32371	Ampk-IR	AmpK	10
Act	2	2	HS	HStoHS	7	HStoHS D7	7	HS	32371	Ampk-IR	AmpK	4
Act	2	2	HS	HStoHS	7	HStoHS D7	7	HS	32371	Ampk-IR	AmpK	13
Act	2	2	HS	HStoHS	7	HStoHS D7	7	HS	32371	Ampk-IR	AmpK	15
Act	2	2	HS	HStoHS	7	HStoHS D7	7	HS	32371	Ampk-IR	AmpK	6
Act	2	2	HS	HStoHS	7	HStoHS D7	7	HS	32371	Ampk-IR	AmpK	14
Act	2	2	HS	HStoHS	7	HStoHS D7	7	HS	32371	Ampk-IR	AmpK	15
Act	2	3	HS	HStoHS	7	HStoHS D7	7	HS	32371	Ampk-IR	AmpK	0
Act	2	3	HS	HStoHS	7	HStoHS D7	7	HS	32371	Ampk-IR	AmpK	0
Act	2	3	HS	HStoHS	7	HStoHS D7	7	HS	32371	Ampk-IR	AmpK	0
Act	2	3	HS	HStoHS	7	HStoHS D7	7	HS	32371	Ampk-IR	AmpK	10
Act	2	3	HS	HStoHS	7	HStoHS D7	7	HS	32371	Ampk-IR	AmpK	8
Act	2	3	HS	HStoHS	7	HStoHS D7	7	HS	32371	Ampk-IR	AmpK	10
Act	2	3	HS	HStoHS	7	HStoHS D7	7	HS	32371	Ampk-IR	AmpK	2
Act	2	3	HS	HStoHS	7	HStoHS D7	7	HS	Cs	Control	Control	2
Act	2	3	HS	HStoHS	7	HStoHS D7	7	HS	Cs	Control	Control	2
Act	2	3	HS	HStoHS	7	HStoHS D7	7	HS	Cs	Control	Control	1
Act	2	3	HS	HStoHS	7	HStoHS D7	7	HS	Cs	Control	Control	10
Act	2	3	HS	HStoHS	7	HStoHS D7	7	HS	Cs	Control	Control	1
Act	2	3	HS	HStoHS	7	HStoHS D7	7	HS	Cs	Control	Control	2
Act	2	3	HS	HStoHS	7	HStoHS D7	7	HS	Cs	Control	Control	4
Act	2	3	HS	HStoHS	7	HStoHS D7	7	HS	Cs	Control	Control	5
Act	2	3	HS	HStoHS	7	HStoHS D7	7	HS	67215	Gcn2-IR	Gcn2	25
Act	2	3	HS	HStoHS	7	HStoHS D7	7	HS	67215	Gcn2-IR	Gcn2	8
Act	2	3	HS	HStoHS	7	HStoHS D7	7	HS	67215	Gcn2-IR	Gcn2	18
Act	2	3	HS	HStoHS	7	HStoHS D7	7	HS	67215	Gcn2-IR	Gcn2	15
Act	2	3	HS	HStoHS	7	HStoHS D7	7	HS	67215	Gcn2-IR	Gcn2	9
Act	2	3	HS	HStoHS	7	HStoHS D7	7	HS	67215	Gcn2-IR	Gcn2	5
Act	2	3	HS	HStoHS	7	HStoHS D7	7	HS	67215	Gcn2-IR	Gcn2	4
Act	2	3	HS	HStoHS	7	HStoHS D7	7	HS	67215	Gcn2-IR	Gcn2	17
Act	2	3	HS	HStoHS	7	HStoHS D7	7	HS	67215	Gcn2-IR	Gcn2	11
Act	2	3	HS	HStoHS	7	HStoHS D7	7	HS	60003	Lk6-IR	Lk6	4
Act	2	3	HS	HStoHS	7	HStoHS D7	7	HS	60003	Lk6-IR	Lk6	8
Act	2	3	HS	HStoHS	7	HStoHS D7	7	HS	60003	Lk6-IR	Lk6	38
Act	2	3	HS	HStoHS	7	HStoHS D7	7	HS	60003	Lk6-IR	Lk6	23
Act	2	3	HS	HStoHS	7	HStoHS D7	7	HS	60003	Lk6-IR	Lk6	12
Act	2	3	HS	HStoHS	7	HStoHS D7	7	HS	60003	Lk6-IR	Lk6	42
Act	2	3	HS	HStoHS	7	HStoHS D7	7	HS	60003	Lk6-IR	Lk6	22
Act	2	3	HS	HStoHS	7	HStoHS D7	7	HS	60003	Lk6-IR	Lk6	16
Act	2	3	HS	HStoHS	7	HStoHS D7	7	HS	60003	Lk6-IR	Lk6	10
Act	2	3	HS	HStoHS	7	HStoHS D7	7	HS	42499	PEK-IR	PEK	10
Act	2	3	HS	HStoHS	7	HStoHS D7	7	HS	42499	PEK-IR	PEK	9
Act	2	3	HS	HStoHS	7	HStoHS D7	7	HS	42499	PEK-IR	PEK	8
Act	2	3	HS	HStoHS	7	HStoHS D7	7	HS	42499	PEK-IR	PEK	3
Act	2	3	HS	HStoHS	7	HStoHS D7	7	HS	42499	PEK-IR	PEK	7
