# Supplementary material for: Multiscale analysis reveals that diet-dependent midgut plasticity emerges from alterations in both stem cell niche coupling and enterocyte size
Source: eLife. 2021 Sep 23;10:e64125. doi: 10.7554/eLife.64125 (PMC8528489; doi:10.7554/eLife.64125)
Supplement: Figure 5—source data 10. [file elife-64125-fig5-data10.csv]

Female.Line	Phase	Repeat	Dietold	Diet1	Day	Diet	Group	C.G	Male.Line.ID	Male.Line	Gene	Total.L
Act	2	1	HS	HStoHS	7	HStoHS D7	7	HS	67215	Gcn2-IR	Gcn2	4531.589
Act	2	1	HS	HStoHS	7	HStoHS D7	7	HS	67215	Gcn2-IR	Gcn2	4192.917
Act	2	1	HS	HStoHS	7	HStoHS D7	7	HS	67215	Gcn2-IR	Gcn2	4748.001
Act	2	1	HS	HStoHS	7	HStoHS D7	7	HS	67215	Gcn2-IR	Gcn2	4947.853
Act	2	1	HS	HStoHS	7	HStoHS D7	7	HS	67215	Gcn2-IR	Gcn2	4597.535
Act	2	1	HS	HStoHS	7	HStoHS D7	7	HS	67215	Gcn2-IR	Gcn2	4185.661
Act	2	1	HS	HStoHS	7	HStoHS D7	7	HS	67215	Gcn2-IR	Gcn2	3950.081
Act	2	1	HS	HStoHS	7	HStoHS D7	7	HS	60003	Lk6-IR	Lk6	3811.973
Act	2	1	HS	HStoHS	7	HStoHS D7	7	HS	60003	Lk6-IR	Lk6	4811.181
Act	2	1	HS	HStoHS	7	HStoHS D7	7	HS	60003	Lk6-IR	Lk6	4602.986
Act	2	1	HS	HStoHS	7	HStoHS D7	7	HS	60003	Lk6-IR	Lk6	3425.437
Act	2	1	HS	HStoHS	7	HStoHS D7	7	HS	60003	Lk6-IR	Lk6	2990.827
Act	2	1	HS	HStoHS	7	HStoHS D7	7	HS	60003	Lk6-IR	Lk6	4283.07
Act	2	1	HS	HStoHS	7	HStoHS D7	7	HS	60003	Lk6-IR	Lk6	4179.081
Act	2	1	HS	HStoHS	7	HStoHS D7	7	HS	60003	Lk6-IR	Lk6	2905.243
Act	2	1	HS	HStoHS	7	HStoHS D7	7	HS	Cs	Control	Control	3718.165
Act	2	1	HS	HStoHS	7	HStoHS D7	7	HS	Cs	Control	Control	3947.882
Act	2	1	HS	HStoHS	7	HStoHS D7	7	HS	Cs	Control	Control	3431.224
Act	2	1	HS	HStoHS	7	HStoHS D7	7	HS	Cs	Control	Control	4086.181
Act	2	1	HS	HStoHS	7	HStoHS D7	7	HS	Cs	Control	Control	3362.191
Act	2	1	HS	HStoHS	7	HStoHS D7	7	HS	Cs	Control	Control	3843.424
Act	2	1	HS	HStoHS	7	HStoHS D7	7	HS	Cs	Control	Control	3682.717
Act	2	2	HS	HStoHS	7	HStoHS D7	7	HS	Cs	Control	Control	3769.589
Act	2	2	HS	HStoHS	7	HStoHS D7	7	HS	Cs	Control	Control	4065.42
Act	2	2	HS	HStoHS	7	HStoHS D7	7	HS	Cs	Control	Control	4692.159
Act	2	2	HS	HStoHS	7	HStoHS D7	7	HS	Cs	Control	Control	4534.875
Act	2	2	HS	HStoHS	7	HStoHS D7	7	HS	Cs	Control	Control	4681.881
Act	2	2	HS	HStoHS	7	HStoHS D7	7	HS	Cs	Control	Control	4661.186
Act	2	2	HS	HStoHS	7	HStoHS D7	7	HS	Cs	Control	Control	4051.285
Act	2	2	HS	HStoHS	7	HStoHS D7	7	HS	Cs	Control	Control	4187.786
Act	2	2	HS	HStoHS	7	HStoHS D7	7	HS	67215	Gcn2-IR	Gcn2	3776.106
Act	2	2	HS	HStoHS	7	HStoHS D7	7	HS	67215	Gcn2-IR	Gcn2	4462.443
Act	2	2	HS	HStoHS	7	HStoHS D7	7	HS	67215	Gcn2-IR	Gcn2	3777.654
Act	2	2	HS	HStoHS	7	HStoHS D7	7	HS	67215	Gcn2-IR	Gcn2	4661.411
Act	2	2	HS	HStoHS	7	HStoHS D7	7	HS	67215	Gcn2-IR	Gcn2	4024.763
Act	2	2	HS	HStoHS	7	HStoHS D7	7	HS	67215	Gcn2-IR	Gcn2	4209.042
Act	2	2	HS	HStoHS	7	HStoHS D7	7	HS	67215	Gcn2-IR	Gcn2	4173.105
Act	2	2	HS	HStoHS	7	HStoHS D7	7	HS	60003	Lk6-IR	Lk6	4207.764
Act	2	2	HS	HStoHS	7	HStoHS D7	7	HS	60003	Lk6-IR	Lk6	4697.107
Act	2	2	HS	HStoHS	7	HStoHS D7	7	HS	60003	Lk6-IR	Lk6	5357.378
Act	2	2	HS	HStoHS	7	HStoHS D7	7	HS	60003	Lk6-IR	Lk6	4512.697
Act	2	2	HS	HStoHS	7	HStoHS D7	7	HS	60003	Lk6-IR	Lk6	3710.845
Act	2	3	HS	HStoHS	7	HStoHS D7	7	HS	Cs	Control	Control	4000.81
Act	2	3	HS	HStoHS	7	HStoHS D7	7	HS	Cs	Control	Control	4882.091
Act	2	3	HS	HStoHS	7	HStoHS D7	7	HS	Cs	Control	Control	4448.686
Act	2	3	HS	HStoHS	7	HStoHS D7	7	HS	Cs	Control	Control	4989.293
Act	2	3	HS	HStoHS	7	HStoHS D7	7	HS	Cs	Control	Control	4891.808
Act	2	3	HS	HStoHS	7	HStoHS D7	7	HS	Cs	Control	Control	4986.804
Act	2	3	HS	HStoHS	7	HStoHS D7	7	HS	Cs	Control	Control	4072.839
Act	2	3	HS	HStoHS	7	HStoHS D7	7	HS	Cs	Control	Control	4624.644
Act	2	3	HS	HStoHS	7	HStoHS D7	7	HS	67215	Gcn2-IR	Gcn2	4577.937
Act	2	3	HS	HStoHS	7	HStoHS D7	7	HS	67215	Gcn2-IR	Gcn2	4407.643
Act	2	3	HS	HStoHS	7	HStoHS D7	7	HS	67215	Gcn2-IR	Gcn2	4500.779
Act	2	3	HS	HStoHS	7	HStoHS D7	7	HS	67215	Gcn2-IR	Gcn2	4643.129
Act	2	3	HS	HStoHS	7	HStoHS D7	7	HS	67215	Gcn2-IR	Gcn2	3430.128
Act	2	3	HS	HStoHS	7	HStoHS D7	7	HS	67215	Gcn2-IR	Gcn2	3674.045
Act	2	3	HS	HStoHS	7	HStoHS D7	7	HS	67215	Gcn2-IR	Gcn2	4469.717
Act	2	3	HS	HStoHS	7	HStoHS D7	7	HS	67215	Gcn2-IR	Gcn2	4340.419
Act	2	3	HS	HStoHS	7	HStoHS D7	7	HS	67215	Gcn2-IR	Gcn2	4081.614
Act	2	3	HS	HStoHS	7	HStoHS D7	7	HS	60003	Lk6-IR	Lk6	4663.314
Act	2	3	HS	HStoHS	7	HStoHS D7	7	HS	60003	Lk6-IR	Lk6	5262.82
Act	2	3	HS	HStoHS	7	HStoHS D7	7	HS	60003	Lk6-IR	Lk6	4227.599
Act	2	3	HS	HStoHS	7	HStoHS D7	7	HS	60003	Lk6-IR	Lk6	3126.767
Act	2	3	HS	HStoHS	7	HStoHS D7	7	HS	60003	Lk6-IR	Lk6	5231.75
Act	2	3	HS	HStoHS	7	HStoHS D7	7	HS	60003	Lk6-IR	Lk6	4044.437
Act	2	3	HS	HStoHS	7	HStoHS D7	7	HS	60003	Lk6-IR	Lk6	4249.753
Act	2	3	HS	HStoHS	7	HStoHS D7	7	HS	60003	Lk6-IR	Lk6	2809.847
Act	2	3	HS	HStoHS	7	HStoHS D7	7	HS	60003	Lk6-IR	Lk6	5589.8
Act	2	3	HS	HStoHS	7	HStoHS D7	7	HS	60003	Lk6-IR	Lk6	4686.811
