# Supplementary material for: Multiscale analysis reveals that diet-dependent midgut plasticity emerges from alterations in both stem cell niche coupling and enterocyte size
Source: eLife. 2021 Sep 23;10:e64125. doi: 10.7554/eLife.64125 (PMC8528489; doi:10.7554/eLife.64125)
Supplement: Figure 6—source data 1. [file elife-64125-fig6-data1.csv]

Cross	Repeat	CrossNumber	BL ID	DGRP number	Type	Type1	Diet	xLookup	Total.L	Total.PH3	Area
4 R1	1	4	28178	356	LR	LR S	HY	28178HY11	6349.731	0	468.606
4 R1	1	4	28178	356	LR	LR S	HY	28178HY11	6349.731	0	199.407
4 R1	1	4	28178	356	LR	LR S	HY	28178HY11	6349.731	0	459.433
4 R1	1	4	28178	356	LR	LR S	HY	28178HY11	6349.731	0	233.705
4 R1	1	4	28178	356	LR	LR S	HY	28178HY11	6349.731	0	395.424
4 R1	1	4	28178	356	LR	LR S	HY	28178HY11	6349.731	0	194.023
4 R1	1	4	28178	356	LR	LR S	HY	28178HY11	6349.731	0	363.917
4 R1	1	4	28178	356	LR	LR S	HY	28178HY11	6349.731	0	336.599
4 R1	1	4	28178	356	LR	LR S	HY	28178HY11	6349.731	0	369.301
4 R1	1	4	28178	356	LR	LR S	HY	28178HY11	6349.731	0	198.609
4 R1	1	4	28178	356	LR	LR S	HY	28178HY11	6349.731	0	232.309
4 R1	1	4	28178	356	LR	LR S	HY	28178HY11	6349.731	0	180.862
4 R1	1	4	28178	356	LR	LR S	HY	28178HY11	6349.731	0	355.941
4 R1	1	4	28178	356	LR	LR S	HY	28178HY11	6349.731	0	181.061
4 R1	1	4	28178	356	LR	LR S	HY	28178HY11	6349.731	0	151.15
4 R1	1	4	28178	356	LR	LR S	HY	28178HY11	6349.731	0	214.163
4 R1	1	4	28178	356	LR	LR S	HY	28178HY11	6349.731	0	208.978
4 R1	1	4	28178	356	LR	LR S	HY	28178HY11	6349.731	0	335.402
4 R1	1	4	28178	356	LR	LR S	HY	28178HY11	6349.731	0	287.744
4 R1	1	4	28178	356	LR	LR S	HY	28178HY11	6349.731	0	444.677
4 R1	1	4	28178	356	LR	LR S	HY	28178HY11	6349.731	0	221.541
4 R1	1	4	28178	356	LR	LR S	HY	28178HY11	6349.731	0	343.578
4 R1	1	4	28178	356	LR	LR S	HY	28178HY11	6349.731	0	226.327
4 R1	1	4	28178	356	LR	LR S	HY	28178HY11	6349.731	0	212.568
4 R1	1	4	28178	356	LR	LR S	HY	28178HY11	6349.731	0	289.937
4 R1	1	4	28178	356	LR	LR S	HY	28178HY11	6349.731	0	435.105
4 R1	1	4	28178	356	LR	LR S	HY	28178HY11	6349.731	0	222.139
4 R1	1	4	28178	356	LR	LR S	HY	28178HY11	6349.731	0	284.753
4 R1	1	4	28178	356	LR	LR S	HY	28178HY11	6349.731	0	336.2
4 R1	1	4	28178	356	LR	LR S	HY	28178HY11	6349.731	0	154.141
4 R1	1	4	28178	356	LR	LR S	HY	28178HY21	5334.079	60	473.99
4 R1	1	4	28178	356	LR	LR S	HY	28178HY21	5334.079	60	478.776
4 R1	1	4	28178	356	LR	LR S	HY	28178HY21	5334.079	60	397.218
4 R1	1	4	28178	356	LR	LR S	HY	28178HY21	5334.079	60	466.811
4 R1	1	4	28178	356	LR	LR S	HY	28178HY21	5334.079	60	477.38
4 R1	1	4	28178	356	LR	LR S	HY	28178HY21	5334.079	60	258.631
4 R1	1	4	28178	356	LR	LR S	HY	28178HY21	5334.079	60	497.32
4 R1	1	4	28178	356	LR	LR S	HY	28178HY21	5334.079	60	520.651
4 R1	1	4	28178	356	LR	LR S	HY	28178HY21	5334.079	60	590.244
4 R1	1	4	28178	356	LR	LR S	HY	28178HY21	5334.079	60	479.972
4 R1	1	4	28178	356	LR	LR S	HY	28178HY21	5334.079	60	335.003
4 R1	1	4	28178	356	LR	LR S	HY	28178HY21	5334.079	60	335.402
4 R1	1	4	28178	356	LR	LR S	HY	28178HY21	5334.079	60	499.913
4 R1	1	4	28178	356	LR	LR S	HY	28178HY21	5334.079	60	307.485
4 R1	1	4	28178	356	LR	LR S	HY	28178HY21	5334.079	60	443.879
4 R1	1	4	28178	356	LR	LR S	HY	28178HY21	5334.079	60	565.717
4 R1	1	4	28178	356	LR	LR S	HY	28178HY21	5334.079	60	392.831
4 R1	1	4	28178	356	LR	LR S	HY	28178HY21	5334.079	60	741.195
4 R1	1	4	28178	356	LR	LR S	HY	28178HY21	5334.079	60	719.061
4 R1	1	4	28178	356	LR	LR S	HY	28178HY21	5334.079	60	321.045
4 R1	1	4	28178	356	LR	LR S	HY	28178HY21	5334.079	60	701.712
4 R1	1	4	28178	356	LR	LR S	HY	28178HY21	5334.079	60	481.168
4 R1	1	4	28178	356	LR	LR S	HY	28178HY21	5334.079	60	696.129
4 R1	1	4	28178	356	LR	LR S	HY	28178HY21	5334.079	60	374.286
4 R1	1	4	28178	356	LR	LR S	HY	28178HY21	5334.079	60	646.875
4 R1	1	4	28178	356	LR	LR S	HY	28178HY21	5334.079	60	579.077
4 R1	1	4	28178	356	LR	LR S	HY	28178HY21	5334.079	60	724.245
4 R1	1	4	28178	356	LR	LR S	HY	28178HY21	5334.079	60	729.031
4 R1	1	4	28178	356	LR	LR S	HY	28178HY21	5334.079	60	609.188
4 R1	1	4	28178	356	LR	LR S	HY	28178HY21	5334.079	60	483.163
4 R1	1	4	28178	356	LR	LR S	HY	28178HY31	4237.647	0	204.392
4 R1	1	4	28178	356	LR	LR S	HY	28178HY31	4237.647	0	189.835
4 R1	1	4	28178	356	LR	LR S	HY	28178HY31	4237.647	0	253.645
4 R1	1	4	28178	356	LR	LR S	HY	28178HY31	4237.647	0	165.308
4 R1	1	4	28178	356	LR	LR S	HY	28178HY31	4237.647	0	220.145
4 R1	1	4	28178	356	LR	LR S	HY	28178HY31	4237.647	0	195.419
4 R1	1	4	28178	356	LR	LR S	HY	28178HY31	4237.647	0	151.15
4 R1	1	4	28178	356	LR	LR S	HY	28178HY31	4237.647	0	227.124
4 R1	1	4	28178	356	LR	LR S	HY	28178HY31	4237.647	0	119.445
4 R1	1	4	28178	356	LR	LR S	HY	28178HY31	4237.647	0	309.28
4 R1	1	4	28178	356	LR	LR S	HY	28178HY31	4237.647	0	244.672
4 R1	1	4	28178	356	LR	LR S	HY	28178HY31	4237.647	0	213.166
4 R1	1	4	28178	356	LR	LR S	HY	28178HY31	4237.647	0	244.871
4 R1	1	4	28178	356	LR	LR S	HY	28178HY31	4237.647	0	185.847
4 R1	1	4	28178	356	LR	LR S	HY	28178HY31	4237.647	0	189.038
4 R1	1	4	28178	356	LR	LR S	HY	28178HY31	4237.647	0	242.479
4 R1	1	4	28178	356	LR	LR S	HY	28178HY31	4237.647	0	345.971
4 R1	1	4	28178	356	LR	LR S	HY	28178HY31	4237.647	0	189.237
4 R1	1	4	28178	356	LR	LR S	HY	28178HY31	4237.647	0	154.141
4 R1	1	4	28178	356	LR	LR S	HY	28178HY31	4237.647	0	224.133
4 R1	1	4	28178	356	LR	LR S	HY	28178HY31	4237.647	0	295.72
4 R1	1	4	28178	356	LR	LR S	HY	28178HY31	4237.647	0	298.113
4 R1	1	4	28178	356	LR	LR S	HY	28178HY31	4237.647	0	266.208
4 R1	1	4	28178	356	LR	LR S	HY	28178HY31	4237.647	0	150.353
4 R1	1	4	28178	356	LR	LR S	HY	28178HY31	4237.647	0	177.671
4 R1	1	4	28178	356	LR	LR S	HY	28178HY31	4237.647	0	274.384
4 R1	1	4	28178	356	LR	LR S	HY	28178HY31	4237.647	0	142.576
4 R1	1	4	28178	356	LR	LR S	HY	28178HY31	4237.647	0	296.717
4 R1	1	4	28178	356	LR	LR S	HY	28178HY31	4237.647	0	234.502
4 R1	1	4	28178	356	LR	LR S	HY	28178HY31	4237.647	0	194.82
4 R1	1	4	28178	356	LR	LR S	HY	28178HY41	5354.986	5	783.27
4 R1	1	4	28178	356	LR	LR S	HY	28178HY41	5354.986	5	339.988
4 R1	1	4	28178	356	LR	LR S	HY	28178HY41	5354.986	5	333.408
4 R1	1	4	28178	356	LR	LR S	HY	28178HY41	5354.986	5	631.521
4 R1	1	4	28178	356	LR	LR S	HY	28178HY41	5354.986	5	511.079
4 R1	1	4	28178	356	LR	LR S	HY	28178HY41	5354.986	5	238.49
4 R1	1	4	28178	356	LR	LR S	HY	28178HY41	5354.986	5	403.4
4 R1	1	4	28178	356	LR	LR S	HY	28178HY41	5354.986	5	598.22
4 R1	1	4	28178	356	LR	LR S	HY	28178HY41	5354.986	5	362.521
4 R1	1	4	28178	356	LR	LR S	HY	28178HY41	5354.986	5	374.486
4 R1	1	4	28178	356	LR	LR S	HY	28178HY41	5354.986	5	355.343
4 R1	1	4	28178	356	LR	LR S	HY	28178HY41	5354.986	5	507.49
4 R1	1	4	28178	356	LR	LR S	HY	28178HY41	5354.986	5	390.837
4 R1	1	4	28178	356	LR	LR S	HY	28178HY41	5354.986	5	449.064
4 R1	1	4	28178	356	LR	LR S	HY	28178HY41	5354.986	5	477.978
4 R1	1	4	28178	356	LR	LR S	HY	28178HY41	5354.986	5	464.418
4 R1	1	4	28178	356	LR	LR S	HY	28178HY41	5354.986	5	344.774
4 R1	1	4	28178	356	LR	LR S	HY	28178HY41	5354.986	5	603.006
4 R1	1	4	28178	356	LR	LR S	HY	28178HY41	5354.986	5	345.372
4 R1	1	4	28178	356	LR	LR S	HY	28178HY41	5354.986	5	349.361
4 R1	1	4	28178	356	LR	LR S	HY	28178HY41	5354.986	5	294.923
4 R1	1	4	28178	356	LR	LR S	HY	28178HY41	5354.986	5	314.863
4 R1	1	4	28178	356	LR	LR S	HY	28178HY41	5354.986	5	380.269
4 R1	1	4	28178	356	LR	LR S	HY	28178HY41	5354.986	5	345.971
4 R1	1	4	28178	356	LR	LR S	HY	28178HY41	5354.986	5	539.395
4 R1	1	4	28178	356	LR	LR S	HY	28178HY41	5354.986	5	542.386
4 R1	1	4	28178	356	LR	LR S	HY	28178HY41	5354.986	5	250.255
4 R1	1	4	28178	356	LR	LR S	HY	28178HY41	5354.986	5	639.298
4 R1	1	4	28178	356	LR	LR S	HY	28178HY41	5354.986	5	277.375
4 R1	1	4	28178	356	LR	LR S	HY	28178HY41	5354.986	5	484.359
4 R1	1	4	28178	356	LR	LR S	HY	28178HY51	5823.849	4	776.889
4 R1	1	4	28178	356	LR	LR S	HY	28178HY51	5823.849	4	638.7
4 R1	1	4	28178	356	LR	LR S	HY	28178HY51	5823.849	4	404.197
4 R1	1	4	28178	356	LR	LR S	HY	28178HY51	5823.849	4	324.634
4 R1	1	4	28178	356	LR	LR S	HY	28178HY51	5823.849	4	821.955
4 R1	1	4	28178	356	LR	LR S	HY	28178HY51	5823.849	4	265.211
4 R1	1	4	28178	356	LR	LR S	HY	28178HY51	5823.849	4	423.939
4 R1	1	4	28178	356	LR	LR S	HY	28178HY51	5823.849	4	168.299
4 R1	1	4	28178	356	LR	LR S	HY	28178HY51	5823.849	4	437.897
4 R1	1	4	28178	356	LR	LR S	HY	28178HY51	5823.849	4	529.026
4 R1	1	4	28178	356	LR	LR S	HY	28178HY51	5823.849	4	402.203
4 R1	1	4	28178	356	LR	LR S	HY	28178HY51	5823.849	4	433.909
4 R1	1	4	28178	356	LR	LR S	HY	28178HY51	5823.849	4	318.253
4 R1	1	4	28178	356	LR	LR S	HY	28178HY51	5823.849	4	467.21
4 R1	1	4	28178	356	LR	LR S	HY	28178HY51	5823.849	4	634.313
4 R1	1	4	28178	356	LR	LR S	HY	28178HY51	5823.849	4	724.843
4 R1	1	4	28178	356	LR	LR S	HY	28178HY51	5823.849	4	212.368
4 R1	1	4	28178	356	LR	LR S	HY	28178HY51	5823.849	4	328.423
4 R1	1	4	28178	356	LR	LR S	HY	28178HY51	5823.849	4	403.998
4 R1	1	4	28178	356	LR	LR S	HY	28178HY51	5823.849	4	197.213
4 R1	1	4	28178	356	LR	LR S	HY	28178HY51	5823.849	4	267.803
4 R1	1	4	28178	356	LR	LR S	HY	28178HY51	5823.849	4	637.503
4 R1	1	4	28178	356	LR	LR S	HY	28178HY51	5823.849	4	392.831
4 R1	1	4	28178	356	LR	LR S	HY	28178HY51	5823.849	4	212.169
4 R1	1	4	28178	356	LR	LR S	HY	28178HY51	5823.849	4	543.383
4 R1	1	4	28178	356	LR	LR S	HY	28178HY51	5823.849	4	296.717
4 R1	1	4	28178	356	LR	LR S	HY	28178HY51	5823.849	4	413.171
4 R1	1	4	28178	356	LR	LR S	HY	28178HY51	5823.849	4	475.784
4 R1	1	4	28178	356	LR	LR S	HY	28178HY51	5823.849	4	655.849
4 R1	1	4	28178	356	LR	LR S	HY	28178HY51	5823.849	4	346.968
4 R1	1	4	28178	356	LR	LR S	HY	28178HY61	5712.949	8	642.688
4 R1	1	4	28178	356	LR	LR S	HY	28178HY61	5712.949	8	860.241
4 R1	1	4	28178	356	LR	LR S	HY	28178HY61	5712.949	8	513.871
4 R1	1	4	28178	356	LR	LR S	HY	28178HY61	5712.949	8	398.215
4 R1	1	4	28178	356	LR	LR S	HY	28178HY61	5712.949	8	535.008
4 R1	1	4	28178	356	LR	LR S	HY	28178HY61	5712.949	8	347.765
4 R1	1	4	28178	356	LR	LR S	HY	28178HY61	5712.949	8	430.519
4 R1	1	4	28178	356	LR	LR S	HY	28178HY61	5712.949	8	654.253
4 R1	1	4	28178	356	LR	LR S	HY	28178HY61	5712.949	8	439.094
4 R1	1	4	28178	356	LR	LR S	HY	28178HY61	5712.949	8	629.128
4 R1	1	4	28178	356	LR	LR S	HY	28178HY61	5712.949	8	339.39
4 R1	1	4	28178	356	LR	LR S	HY	28178HY61	5712.949	8	764.924
4 R1	1	4	28178	356	LR	LR S	HY	28178HY61	5712.949	8	336.399
4 R1	1	4	28178	356	LR	LR S	HY	28178HY61	5712.949	8	427.727
4 R1	1	4	28178	356	LR	LR S	HY	28178HY61	5712.949	8	579.277
4 R1	1	4	28178	356	LR	LR S	HY	28178HY61	5712.949	8	488.945
4 R1	1	4	28178	356	LR	LR S	HY	28178HY61	5712.949	8	428.126
4 R1	1	4	28178	356	LR	LR S	HY	28178HY61	5712.949	8	430.719
4 R1	1	4	28178	356	LR	LR S	HY	28178HY61	5712.949	8	454.249
4 R1	1	4	28178	356	LR	LR S	HY	28178HY61	5712.949	8	644.283
4 R1	1	4	28178	356	LR	LR S	HY	28178HY61	5712.949	8	492.136
4 R1	1	4	28178	356	LR	LR S	HY	28178HY61	5712.949	8	409.98
4 R1	1	4	28178	356	LR	LR S	HY	28178HY61	5712.949	8	424.736
4 R1	1	4	28178	356	LR	LR S	HY	28178HY61	5712.949	8	646.477
4 R1	1	4	28178	356	LR	LR S	HY	28178HY61	5712.949	8	608.789
4 R1	1	4	28178	356	LR	LR S	HY	28178HY61	5712.949	8	575.488
4 R1	1	4	28178	356	LR	LR S	HY	28178HY61	5712.949	8	481.767
4 R1	1	4	28178	356	LR	LR S	HY	28178HY61	5712.949	8	319.649
4 R1	1	4	28178	356	LR	LR S	HY	28178HY61	5712.949	8	317.456
4 R1	1	4	28178	356	LR	LR S	HY	28178HY61	5712.949	8	747.775
4 R1	1	4	28178	356	LR	LR S	HY	28178HY71	6332.657	0	724.843
4 R1	1	4	28178	356	LR	LR S	HY	28178HY71	6332.657	0	290.735
4 R1	1	4	28178	356	LR	LR S	HY	28178HY71	6332.657	0	882.973
4 R1	1	4	28178	356	LR	LR S	HY	28178HY71	6332.657	0	741.594
4 R1	1	4	28178	356	LR	LR S	HY	28178HY71	6332.657	0	612.777
4 R1	1	4	28178	356	LR	LR S	HY	28178HY71	6332.657	0	596.426
4 R1	1	4	28178	356	LR	LR S	HY	28178HY71	6332.657	0	194.621
4 R1	1	4	28178	356	LR	LR S	HY	28178HY71	6332.657	0	261.223
4 R1	1	4	28178	356	LR	LR S	HY	28178HY71	6332.657	0	453.85
4 R1	1	4	28178	356	LR	LR S	HY	28178HY71	6332.657	0	469.204
4 R1	1	4	28178	356	LR	LR S	HY	28178HY71	6332.657	0	644.084
4 R1	1	4	28178	356	LR	LR S	HY	28178HY71	6332.657	0	819.96
4 R1	1	4	28178	356	LR	LR S	HY	28178HY71	6332.657	0	286.946
4 R1	1	4	28178	356	LR	LR S	HY	28178HY71	6332.657	0	284.553
4 R1	1	4	28178	356	LR	LR S	HY	28178HY71	6332.657	0	406.192
4 R1	1	4	28178	356	LR	LR S	HY	28178HY71	6332.657	0	415.165
4 R1	1	4	28178	356	LR	LR S	HY	28178HY71	6332.657	0	376.679
4 R1	1	4	28178	356	LR	LR S	HY	28178HY71	6332.657	0	390.638
4 R1	1	4	28178	356	LR	LR S	HY	28178HY71	6332.657	0	608.191
4 R1	1	4	28178	356	LR	LR S	HY	28178HY71	6332.657	0	543.583
4 R1	1	4	28178	356	LR	LR S	HY	28178HY71	6332.657	0	560.133
4 R1	1	4	28178	356	LR	LR S	HY	28178HY71	6332.657	0	417.358
4 R1	1	4	28178	356	LR	LR S	HY	28178HY71	6332.657	0	328.024
4 R1	1	4	28178	356	LR	LR S	HY	28178HY71	6332.657	0	707.694
4 R1	1	4	28178	356	LR	LR S	HY	28178HY71	6332.657	0	487.749
4 R1	1	4	28178	356	LR	LR S	HY	28178HY71	6332.657	0	561.529
4 R1	1	4	28178	356	LR	LR S	HY	28178HY71	6332.657	0	569.705
4 R1	1	4	28178	356	LR	LR S	HY	28178HY71	6332.657	0	425.534
4 R1	1	4	28178	356	LR	LR S	HY	28178HY71	6332.657	0	407.388
4 R1	1	4	28178	356	LR	LR S	HY	28178HY71	6332.657	0	339.988
4 R1	1	4	28178	356	LR	LR S	HS	28178HS11	3480.305	44	405.394
4 R1	1	4	28178	356	LR	LR S	HS	28178HS11	3480.305	44	308.283
4 R1	1	4	28178	356	LR	LR S	HS	28178HS11	3480.305	44	408.385
4 R1	1	4	28178	356	LR	LR S	HS	28178HS11	3480.305	44	273.187
4 R1	1	4	28178	356	LR	LR S	HS	28178HS11	3480.305	44	262.818
4 R1	1	4	28178	356	LR	LR S	HS	28178HS11	3480.305	44	284.354
4 R1	1	4	28178	356	LR	LR S	HS	28178HS11	3480.305	44	351.554
4 R1	1	4	28178	356	LR	LR S	HS	28178HS11	3480.305	44	378.275
4 R1	1	4	28178	356	LR	LR S	HS	28178HS11	3480.305	44	321.842
4 R1	1	4	28178	356	LR	LR S	HS	28178HS11	3480.305	44	311.872
4 R1	1	4	28178	356	LR	LR S	HS	28178HS11	3480.305	44	217.752
4 R1	1	4	28178	356	LR	LR S	HS	28178HS11	3480.305	44	180.662
4 R1	1	4	28178	356	LR	LR S	HS	28178HS21	3034.051	36	340.986
4 R1	1	4	28178	356	LR	LR S	HS	28178HS21	3034.051	36	110.671
4 R1	1	4	28178	356	LR	LR S	HS	28178HS21	3034.051	36	114.061
4 R1	1	4	28178	356	LR	LR S	HS	28178HS21	3034.051	36	110.671
4 R1	1	4	28178	356	LR	LR S	HS	28178HS21	3034.051	36	107.879
4 R1	1	4	28178	356	LR	LR S	HS	28178HS21	3034.051	36	99.105
4 R1	1	4	28178	356	LR	LR S	HS	28178HS21	3034.051	36	353.548
4 R1	1	4	28178	356	LR	LR S	HS	28178HS21	3034.051	36	138.588
4 R1	1	4	28178	356	LR	LR S	HS	28178HS21	3034.051	36	123.632
4 R1	1	4	28178	356	LR	LR S	HS	28178HS21	3034.051	36	117.65
4 R1	1	4	28178	356	LR	LR S	HS	28178HS21	3034.051	36	192.228
4 R1	1	4	28178	356	LR	LR S	HS	28178HS21	3034.051	36	191.63
4 R1	1	4	28178	356	LR	LR S	HS	28178HS21	3034.051	36	126.424
4 R1	1	4	28178	356	LR	LR S	HS	28178HS21	3034.051	36	171.29
4 R1	1	4	28178	356	LR	LR S	HS	28178HS21	3034.051	36	236.895
4 R1	1	4	28178	356	LR	LR S	HS	28178HS21	3034.051	36	92.525
4 R1	1	4	28178	356	LR	LR S	HS	28178HS21	3034.051	36	105.486
4 R1	1	4	28178	356	LR	LR S	HS	28178HS21	3034.051	36	69.992
4 R1	1	4	28178	356	LR	LR S	HS	28178HS21	3034.051	36	202.996
4 R1	1	4	28178	356	LR	LR S	HS	28178HS21	3034.051	36	119.245
4 R1	1	4	28178	356	LR	LR S	HS	28178HS21	3034.051	36	160.522
4 R1	1	4	28178	356	LR	LR S	HS	28178HS31	3473.957	43	208.978
4 R1	1	4	28178	356	LR	LR S	HS	28178HS31	3473.957	43	185.049
4 R1	1	4	28178	356	LR	LR S	HS	28178HS31	3473.957	43	142.177
4 R1	1	4	28178	356	LR	LR S	HS	28178HS31	3473.957	43	108.278
4 R1	1	4	28178	356	LR	LR S	HS	28178HS31	3473.957	43	237.095
4 R1	1	4	28178	356	LR	LR S	HS	28178HS31	3473.957	43	152.746
4 R1	1	4	28178	356	LR	LR S	HS	28178HS31	3473.957	43	145.766
4 R1	1	4	28178	356	LR	LR S	HS	28178HS31	3473.957	43	177.073
4 R1	1	4	28178	356	LR	LR S	HS	28178HS31	3473.957	43	79.164
4 R1	1	4	28178	356	LR	LR S	HS	28178HS31	3473.957	43	139.984
4 R1	1	4	28178	356	LR	LR S	HS	28178HS31	3473.957	43	168.299
4 R1	1	4	28178	356	LR	LR S	HS	28178HS31	3473.957	43	101.897
4 R1	1	4	28178	356	LR	LR S	HS	28178HS31	3473.957	43	160.522
4 R1	1	4	28178	356	LR	LR S	HS	28178HS31	3473.957	43	91.328
4 R1	1	4	28178	356	LR	LR S	HS	28178HS31	3473.957	43	113.263
4 R1	1	4	28178	356	LR	LR S	HS	28178HS31	3473.957	43	149.555
4 R1	1	4	28178	356	LR	LR S	HS	28178HS31	3473.957	43	199.806
4 R1	1	4	28178	356	LR	LR S	HS	28178HS31	3473.957	43	124.829
4 R1	1	4	28178	356	LR	LR S	HS	28178HS31	3473.957	43	237.095
4 R1	1	4	28178	356	LR	LR S	HS	28178HS31	3473.957	43	281.363
4 R1	1	4	28178	356	LR	LR S	HS	28178HS41	3691.243	3	77.17
4 R1	1	4	28178	356	LR	LR S	HS	28178HS41	3691.243	3	110.87
4 R1	1	4	28178	356	LR	LR S	HS	28178HS41	3691.243	3	104.888
4 R1	1	4	28178	356	LR	LR S	HS	28178HS41	3691.243	3	90.531
4 R1	1	4	28178	356	LR	LR S	HS	28178HS41	3691.243	3	99.903
4 R1	1	4	28178	356	LR	LR S	HS	28178HS41	3691.243	3	118.448
4 R1	1	4	28178	356	LR	LR S	HS	28178HS41	3691.243	3	126.224
4 R1	1	4	28178	356	LR	LR S	HS	28178HS41	3691.243	3	62.215
4 R1	1	4	28178	356	LR	LR S	HS	28178HS41	3691.243	3	91.328
4 R1	1	4	28178	356	LR	LR S	HS	28178HS41	3691.243	3	118.647
4 R1	1	4	28178	356	LR	LR S	HS	28178HS41	3691.243	3	118.448
4 R1	1	4	28178	356	LR	LR S	HS	28178HS41	3691.243	3	76.772
4 R1	1	4	28178	356	LR	LR S	HS	28178HS41	3691.243	3	129.814
4 R1	1	4	28178	356	LR	LR S	HS	28178HS41	3691.243	3	122.436
4 R1	1	4	28178	356	LR	LR S	HS	28178HS41	3691.243	3	87.141
4 R1	1	4	28178	356	LR	LR S	HS	28178HS41	3691.243	3	91.727
4 R1	1	4	28178	356	LR	LR S	HS	28178HS41	3691.243	3	103.293
4 R1	1	4	28178	356	LR	LR S	HS	28178HS41	3691.243	3	88.138
4 R1	1	4	28178	356	LR	LR S	HS	28178HS41	3691.243	3	79.962
4 R1	1	4	28178	356	LR	LR S	HS	28178HS41	3691.243	3	53.441
4 R1	1	4	28178	356	LR	LR S	HS	28178HS41	3691.243	3	72.385
4 R1	1	4	28178	356	LR	LR S	HS	28178HS41	3691.243	3	61.617
4 R1	1	4	28178	356	LR	LR S	HS	28178HS41	3691.243	3	99.105
4 R1	1	4	28178	356	LR	LR S	HS	28178HS41	3691.243	3	99.504
4 R1	1	4	28178	356	LR	LR S	HS	28178HS41	3691.243	3	87.739
4 R1	1	4	28178	356	LR	LR S	HS	28178HS41	3691.243	3	137.391
4 R1	1	4	28178	356	LR	LR S	HS	28178HS41	3691.243	3	129.216
4 R1	1	4	28178	356	LR	LR S	HS	28178HS41	3691.243	3	143.174
4 R1	1	4	28178	356	LR	LR S	HS	28178HS41	3691.243	3	132.007
4 R1	1	4	28178	356	LR	LR S	HS	28178HS41	3691.243	3	142.975
4 R1	1	4	28178	356	LR	LR S	HS	28178HS41	3691.243	3	142.775
4 R1	1	4	28178	356	LR	LR S	HS	28178HS41	3691.243	3	76.373
4 R1	1	4	28178	356	LR	LR S	HS	28178HS41	3691.243	3	173.883
4 R1	1	4	28178	356	LR	LR S	HS	28178HS41	3691.243	3	88.935
4 R1	1	4	28178	356	LR	LR S	HS	28178HS41	3691.243	3	95.915
4 R1	1	4	28178	356	LR	LR S	HS	28178HS41	3691.243	3	69.992
4 R1	1	4	28178	356	LR	LR S	HS	28178HS41	3691.243	3	72.185
4 R1	1	4	28178	356	LR	LR S	HS	28178HS41	3691.243	3	74.179
4 R1	1	4	28178	356	LR	LR S	HS	28178HS41	3691.243	3	108.078
4 R1	1	4	28178	356	LR	LR S	HS	28178HS41	3691.243	3	134.998
4 R1	1	4	28178	356	LR	LR S	HS	28178HS51	3743.845	45	235.499
4 R1	1	4	28178	356	LR	LR S	HS	28178HS51	3743.845	45	229.318
4 R1	1	4	28178	356	LR	LR S	HS	28178HS51	3743.845	45	128.019
4 R1	1	4	28178	356	LR	LR S	HS	28178HS51	3743.845	45	234.502
4 R1	1	4	28178	356	LR	LR S	HS	28178HS51	3743.845	45	173.284
4 R1	1	4	28178	356	LR	LR S	HS	28178HS51	3743.845	45	175.079
4 R1	1	4	28178	356	LR	LR S	HS	28178HS51	3743.845	45	188.24
4 R1	1	4	28178	356	LR	LR S	HS	28178HS51	3743.845	45	127.62
4 R1	1	4	28178	356	LR	LR S	HS	28178HS51	3743.845	45	106.683
4 R1	1	4	28178	356	LR	LR S	HS	28178HS51	3743.845	45	94.519
4 R1	1	4	28178	356	LR	LR S	HS	28178HS51	3743.845	45	168.698
4 R1	1	4	28178	356	LR	LR S	HS	28178HS51	3743.845	45	164.511
4 R1	1	4	28178	356	LR	LR S	HS	28178HS51	3743.845	45	159.725
4 R1	1	4	28178	356	LR	LR S	HS	28178HS51	3743.845	45	87.54
4 R1	1	4	28178	356	LR	LR S	HS	28178HS51	3743.845	45	186.645
4 R1	1	4	28178	356	LR	LR S	HS	28178HS51	3743.845	45	182.457
4 R1	1	4	28178	356	LR	LR S	HS	28178HS51	3743.845	45	205.588
4 R1	1	4	28178	356	LR	LR S	HS	28178HS51	3743.845	45	161.519
4 R1	1	4	28178	356	LR	LR S	HS	28178HS51	3743.845	45	154.74
4 R1	1	4	28178	356	LR	LR S	HS	28178HS51	3743.845	45	166.505
4 R1	1	4	28178	356	LR	LR S	HS	28178HS51	3743.845	45	168.1
4 R1	1	4	28178	356	LR	LR S	HS	28178HS51	3743.845	45	113.462
4 R1	1	4	28178	356	LR	LR S	HS	28178HS51	3743.845	45	162.915
4 R1	1	4	28178	356	LR	LR S	HS	28178HS51	3743.845	45	136.992
4 R1	1	4	28178	356	LR	LR S	HS	28178HS51	3743.845	45	163.912
4 R1	1	4	28178	356	LR	LR S	HS	28178HS51	3743.845	45	259.827
4 R1	1	4	28178	356	LR	LR S	HS	28178HS51	3743.845	45	155.936
4 R1	1	4	28178	356	LR	LR S	HS	28178HS51	3743.845	45	189.237
4 R1	1	4	28178	356	LR	LR S	HS	28178HS51	3743.845	45	187.642
4 R1	1	4	28178	356	LR	LR S	HS	28178HS51	3743.845	45	122.037
4 R1	1	4	28178	356	LR	LR S	HS	28178HS51	3743.845	45	86.543
4 R1	1	4	28178	356	LR	LR S	HS	28178HS51	3743.845	45	216.157
4 R1	1	4	28178	356	LR	LR S	HS	28178HS51	3743.845	45	130.213
4 R1	1	4	28178	356	LR	LR S	HS	28178HS51	3743.845	45	147.96
4 R1	1	4	28178	356	LR	LR S	HS	28178HS51	3743.845	45	214.163
4 R1	1	4	28178	356	LR	LR S	HS	28178HS51	3743.845	45	184.451
4 R1	1	4	28178	356	LR	LR S	HS	28178HS51	3743.845	45	177.671
4 R1	1	4	28178	356	LR	LR S	HS	28178HS61	3717.99	23	396.421
4 R1	1	4	28178	356	LR	LR S	HS	28178HS61	3717.99	23	228.121
4 R1	1	4	28178	356	LR	LR S	HS	28178HS61	3717.99	23	292.33
4 R1	1	4	28178	356	LR	LR S	HS	28178HS61	3717.99	23	321.643
4 R1	1	4	28178	356	LR	LR S	HS	28178HS61	3717.99	23	296.717
4 R1	1	4	28178	356	LR	LR S	HS	28178HS61	3717.99	23	127.82
4 R1	1	4	28178	356	LR	LR S	HS	28178HS61	3717.99	23	211.371
4 R1	1	4	28178	356	LR	LR S	HS	28178HS61	3717.99	23	236.297
4 R1	1	4	28178	356	LR	LR S	HS	28178HS61	3717.99	23	182.856
4 R1	1	4	28178	356	LR	LR S	HS	28178HS61	3717.99	23	342.581
4 R1	1	4	28178	356	LR	LR S	HS	28178HS61	3717.99	23	138.588
4 R1	1	4	28178	356	LR	LR S	HS	28178HS61	3717.99	23	175.677
4 R1	1	4	28178	356	LR	LR S	HS	28178HS61	3717.99	23	247.663
4 R1	1	4	28178	356	LR	LR S	HS	28178HS61	3717.99	23	123.433
4 R1	1	4	28178	356	LR	LR S	HS	28178HS61	3717.99	23	130.213
4 R1	1	4	28178	356	LR	LR S	HS	28178HS61	3717.99	23	199.606
4 R1	1	4	28178	356	LR	LR S	HS	28178HS61	3717.99	23	110.073
4 R1	1	4	28178	356	LR	LR S	HS	28178HS61	3717.99	23	273.785
4 R1	1	4	28178	356	LR	LR S	HS	28178HS61	3717.99	23	210.773
4 R1	1	4	28178	356	LR	LR S	HS	28178HS61	3717.99	23	190.832
4 R1	1	4	28178	356	LR	LR S	HS	28178HS61	3717.99	23	310.476
4 R1	1	4	28178	356	LR	LR S	HS	28178HS61	3717.99	23	391.037
4 R1	1	4	28178	356	LR	LR S	HS	28178HS61	3717.99	23	251.252
4 R1	1	4	28178	356	LR	LR S	HS	28178HS61	3717.99	23	359.53
4 R1	1	4	28178	356	LR	LR S	HS	28178HS61	3717.99	23	195.419
4 R1	1	4	28178	356	LR	LR S	HS	28178HS61	3717.99	23	260.824
4 R1	1	4	28178	356	LR	LR S	HS	28178HS61	3717.99	23	163.314
4 R1	1	4	28178	356	LR	LR S	HS	28178HS61	3717.99	23	158.728
4 R1	1	4	28178	356	LR	LR S	HS	28178HS61	3717.99	23	191.231
4 R1	1	4	28178	356	LR	LR S	HS	28178HS61	3717.99	23	174.281
4 R1	1	4	28178	356	LR	LR S	HS	28178HS71	3480.864	23	103.093
4 R1	1	4	28178	356	LR	LR S	HS	28178HS71	3480.864	23	423.141
4 R1	1	4	28178	356	LR	LR S	HS	28178HS71	3480.864	23	216.755
4 R1	1	4	28178	356	LR	LR S	HS	28178HS71	3480.864	23	336.798
4 R1	1	4	28178	356	LR	LR S	HS	28178HS71	3480.864	23	176.475
4 R1	1	4	28178	356	LR	LR S	HS	28178HS71	3480.864	23	123.832
4 R1	1	4	28178	356	LR	LR S	HS	28178HS71	3480.864	23	341.584
4 R1	1	4	28178	356	LR	LR S	HS	28178HS71	3480.864	23	98.507
4 R1	1	4	28178	356	LR	LR S	HS	28178HS71	3480.864	23	371.894
4 R1	1	4	28178	356	LR	LR S	HS	28178HS71	3480.864	23	112.266
4 R1	1	4	28178	356	LR	LR S	HS	28178HS71	3480.864	23	93.322
4 R1	1	4	28178	356	LR	LR S	HS	28178HS71	3480.864	23	298.312
4 R1	1	4	28178	356	LR	LR S	HS	28178HS71	3480.864	23	157.531
4 R1	1	4	28178	356	LR	LR S	HS	28178HS71	3480.864	23	185.648
4 R1	1	4	28178	356	LR	LR S	HS	28178HS71	3480.864	23	96.513
4 R1	1	4	28178	356	LR	LR S	HS	28178HS71	3480.864	23	298.711
4 R1	1	4	28178	356	LR	LR S	HS	28178HS71	3480.864	23	110.073
4 R1	1	4	28178	356	LR	LR S	HS	28178HS71	3480.864	23	164.311
4 R1	1	4	28178	356	LR	LR S	HS	28178HS71	3480.864	23	169.097
4 R1	1	4	28178	356	LR	LR S	HS	28178HS71	3480.864	23	95.715
4 R1	1	4	28178	356	LR	LR S	HS	28178HS71	3480.864	23	230.315
4 R1	1	4	28178	356	LR	LR S	HS	28178HS71	3480.864	23	260.824
4 R1	1	4	28178	356	LR	LR S	HS	28178HS71	3480.864	23	332.012
4 R1	1	4	28178	356	LR	LR S	HS	28178HS71	3480.864	23	164.112
4 R1	1	4	28178	356	LR	LR S	HS	28178HS71	3480.864	23	173.683
4 R1	1	4	28178	356	LR	LR S	HS	28178HS71	3480.864	23	81.757
4 R1	1	4	28178	356	LR	LR S	HS	28178HS71	3480.864	23	137.989
4 R1	1	4	28178	356	LR	LR S	HS	28178HS71	3480.864	23	142.376
4 R1	1	4	28178	356	LR	LR S	HS	28178HS71	3480.864	23	304.095
4 R1	1	4	28178	356	LR	LR S	HS	28178HS71	3480.864	23	188.838
4 R1	1	4	28178	356	LR	LR S	HS	28178HS71	3480.864	23	152.546
4 R1	1	4	28178	356	LR	LR S	HS	28178HS71	3480.864	23	136.594
4 R1	1	4	28178	356	LR	LR S	HS	28178HS71	3480.864	23	141.978
4 R1	1	4	28178	356	LR	LR S	HS	28178HS71	3480.864	23	91.927
4 R1	1	4	28178	356	LR	LR S	HS	28178HS71	3480.864	23	109.075
4 R1	1	4	28178	356	LR	LR S	HS	28178HS71	3480.864	23	107.281
4 R1	1	4	28178	356	LR	LR S	HS	28178HS71	3480.864	23	158.528
4 R1	1	4	28178	356	LR	LR S	HS	28178HS71	3480.864	23	169.097
4 R1	1	4	28178	356	LR	LR S	HS	28178HS71	3480.864	23	140.183
4 R1	1	4	28178	356	LR	LR S	HS	28178HS71	3480.864	23	115.855
4 R1	1	4	28178	356	LR	LR S	HS	28178HS71	3480.864	23	132.406
4 R1	1	4	28178	356	LR	LR S	HS	28178HS71	3480.864	23	144.37
4 R1	1	4	28178	356	LR	LR S	HS	28178HS81	2590.492	20	309.878
4 R1	1	4	28178	356	LR	LR S	HS	28178HS81	2590.492	20	246.467
4 R1	1	4	28178	356	LR	LR S	HS	28178HS81	2590.492	20	159.326
4 R1	1	4	28178	356	LR	LR S	HS	28178HS81	2590.492	20	197.612
4 R1	1	4	28178	356	LR	LR S	HS	28178HS81	2590.492	20	103.691
4 R1	1	4	28178	356	LR	LR S	HS	28178HS81	2590.492	20	161.32
4 R1	1	4	28178	356	LR	LR S	HS	28178HS81	2590.492	20	240.285
4 R1	1	4	28178	356	LR	LR S	HS	28178HS81	2590.492	20	419.751
4 R1	1	4	28178	356	LR	LR S	HS	28178HS81	2590.492	20	398.813
4 R1	1	4	28178	356	LR	LR S	HS	28178HS81	2590.492	20	222.339
4 R1	1	4	28178	356	LR	LR S	HS	28178HS81	2590.492	20	79.962
4 R1	1	4	28178	356	LR	LR S	HS	28178HS81	2590.492	20	161.519
6 R2	2	6	28178	356	LR	LR S	HS	28178HS12	4240.695	33	468.406
6 R2	2	6	28178	356	LR	LR S	HS	28178HS12	4240.695	33	135.995
6 R2	2	6	28178	356	LR	LR S	HS	28178HS12	4240.695	33	259.029
6 R2	2	6	28178	356	LR	LR S	HS	28178HS12	4240.695	33	139.984
6 R2	2	6	28178	356	LR	LR S	HS	28178HS12	4240.695	33	270.994
6 R2	2	6	28178	356	LR	LR S	HS	28178HS12	4240.695	33	203.794
6 R2	2	6	28178	356	LR	LR S	HS	28178HS12	4240.695	33	131.808
6 R2	2	6	28178	356	LR	LR S	HS	28178HS12	4240.695	33	604.402
6 R2	2	6	28178	356	LR	LR S	HS	28178HS12	4240.695	33	241.282
6 R2	2	6	28178	356	LR	LR S	HS	28178HS12	4240.695	33	112.665
6 R2	2	6	28178	356	LR	LR S	HS	28178HS12	4240.695	33	467.21
6 R2	2	6	28178	356	LR	LR S	HS	28178HS12	4240.695	33	438.695
6 R2	2	6	28178	356	LR	LR S	HS	28178HS12	4240.695	33	299.908
6 R2	2	6	28178	356	LR	LR S	HS	28178HS12	4240.695	33	177.273
6 R2	2	6	28178	356	LR	LR S	HS	28178HS12	4240.695	33	149.356
6 R2	2	6	28178	356	LR	LR S	HS	28178HS12	4240.695	33	142.775
6 R2	2	6	28178	356	LR	LR S	HS	28178HS12	4240.695	33	187.243
6 R2	2	6	28178	356	LR	LR S	HS	28178HS22	4405.448	2	436.701
6 R2	2	6	28178	356	LR	LR S	HS	28178HS22	4405.448	2	535.407
6 R2	2	6	28178	356	LR	LR S	HS	28178HS22	4405.448	2	453.65
6 R2	2	6	28178	356	LR	LR S	HS	28178HS22	4405.448	2	307.086
6 R2	2	6	28178	356	LR	LR S	HS	28178HS22	4405.448	2	283.556
6 R2	2	6	28178	356	LR	LR S	HS	28178HS22	4405.448	2	287.943
6 R2	2	6	28178	356	LR	LR S	HS	28178HS22	4405.448	2	248.86
6 R2	2	6	28178	356	LR	LR S	HS	28178HS22	4405.448	2	286.946
6 R2	2	6	28178	356	LR	LR S	HS	28178HS22	4405.448	2	299.11
6 R2	2	6	28178	356	LR	LR S	HS	28178HS22	4405.448	2	161.32
6 R2	2	6	28178	356	LR	LR S	HS	28178HS22	4405.448	2	140.582
6 R2	2	6	28178	356	LR	LR S	HS	28178HS22	4405.448	2	264.214
6 R2	2	6	28178	356	LR	LR S	HS	28178HS22	4405.448	2	391.236
6 R2	2	6	28178	356	LR	LR S	HS	28178HS22	4405.448	2	324.235
6 R2	2	6	28178	356	LR	LR S	HS	28178HS22	4405.448	2	246.467
6 R2	2	6	28178	356	LR	LR S	HS	28178HS22	4405.448	2	307.884
6 R2	2	6	28178	356	LR	LR S	HS	28178HS22	4405.448	2	527.63
6 R2	2	6	28178	356	LR	LR S	HS	28178HS22	4405.448	2	303.298
6 R2	2	6	28178	356	LR	LR S	HS	28178HS22	4405.448	2	188.439
6 R2	2	6	28178	356	LR	LR S	HS	28178HS22	4405.448	2	513.672
6 R2	2	6	28178	356	LR	LR S	HS	28178HS22	4405.448	2	138.986
6 R2	2	6	28178	356	LR	LR S	HS	28178HS22	4405.448	2	246.467
6 R2	2	6	28178	356	LR	LR S	HS	28178HS22	4405.448	2	232.109
6 R2	2	6	28178	356	LR	LR S	HS	28178HS22	4405.448	2	218.151
6 R2	2	6	28178	356	LR	LR S	HS	28178HS22	4405.448	2	209.576
6 R2	2	6	28178	356	LR	LR S	HS	28178HS22	4405.448	2	221.142
6 R2	2	6	28178	356	LR	LR S	HS	28178HS22	4405.448	2	130.412
6 R2	2	6	28178	356	LR	LR S	HS	28178HS22	4405.448	2	331.015
6 R2	2	6	28178	356	LR	LR S	HS	28178HS22	4405.448	2	271.791
6 R2	2	6	28178	356	LR	LR S	HS	28178HS22	4405.448	2	238.291
6 R2	2	6	28178	356	LR	LR S	HS	28178HS32	3945.14	7	424.537
6 R2	2	6	28178	356	LR	LR S	HS	28178HS32	3945.14	7	227.523
6 R2	2	6	28178	356	LR	LR S	HS	28178HS32	3945.14	7	401.605
6 R2	2	6	28178	356	LR	LR S	HS	28178HS32	3945.14	7	621.75
6 R2	2	6	28178	356	LR	LR S	HS	28178HS32	3945.14	7	182.058
6 R2	2	6	28178	356	LR	LR S	HS	28178HS32	3945.14	7	309.479
6 R2	2	6	28178	356	LR	LR S	HS	28178HS32	3945.14	7	398.415
6 R2	2	6	28178	356	LR	LR S	HS	28178HS32	3945.14	7	384.656
6 R2	2	6	28178	356	LR	LR S	HS	28178HS32	3945.14	7	317.854
6 R2	2	6	28178	356	LR	LR S	HS	28178HS32	3945.14	7	293.926
6 R2	2	6	28178	356	LR	LR S	HS	28178HS32	3945.14	7	263.217
6 R2	2	6	28178	356	LR	LR S	HS	28178HS32	3945.14	7	355.542
6 R2	2	6	28178	356	LR	LR S	HS	28178HS32	3945.14	7	408.186
6 R2	2	6	28178	356	LR	LR S	HS	28178HS32	3945.14	7	142.775
6 R2	2	6	28178	356	LR	LR S	HS	28178HS32	3945.14	7	405.992
6 R2	2	6	28178	356	LR	LR S	HS	28178HS32	3945.14	7	163.912
6 R2	2	6	28178	356	LR	LR S	HS	28178HS32	3945.14	7	326.628
6 R2	2	6	28178	356	LR	LR S	HS	28178HS32	3945.14	7	336.399
6 R2	2	6	28178	356	LR	LR S	HS	28178HS32	3945.14	7	154.341
6 R2	2	6	28178	356	LR	LR S	HS	28178HS32	3945.14	7	489.942
6 R2	2	6	28178	356	LR	LR S	HS	28178HS32	3945.14	7	366.31
6 R2	2	6	28178	356	LR	LR S	HS	28178HS32	3945.14	7	305.491
6 R2	2	6	28178	356	LR	LR S	HS	28178HS32	3945.14	7	237.095
6 R2	2	6	28178	356	LR	LR S	HS	28178HS32	3945.14	7	293.128
6 R2	2	6	28178	356	LR	LR S	HS	28178HS32	3945.14	7	411.575
6 R2	2	6	28178	356	LR	LR S	HS	28178HS32	3945.14	7	340.387
6 R2	2	6	28178	356	LR	LR S	HS	28178HS32	3945.14	7	206.984
6 R2	2	6	28178	356	LR	LR S	HS	28178HS32	3945.14	7	301.503
6 R2	2	6	28178	356	LR	LR S	HS	28178HS32	3945.14	7	171.29
6 R2	2	6	28178	356	LR	LR S	HS	28178HS32	3945.14	7	568.708
6 R2	2	6	28178	356	LR	LR S	HS	28178HS42	3569.507	53	324.235
6 R2	2	6	28178	356	LR	LR S	HS	28178HS42	3569.507	53	73.581
6 R2	2	6	28178	356	LR	LR S	HS	28178HS42	3569.507	53	223.535
6 R2	2	6	28178	356	LR	LR S	HS	28178HS42	3569.507	53	362.721
6 R2	2	6	28178	356	LR	LR S	HS	28178HS42	3569.507	53	307.884
6 R2	2	6	28178	356	LR	LR S	HS	28178HS42	3569.507	53	141.379
6 R2	2	6	28178	356	LR	LR S	HS	28178HS42	3569.507	53	411.376
6 R2	2	6	28178	356	LR	LR S	HS	28178HS42	3569.507	53	507.291
6 R2	2	6	28178	356	LR	LR S	HS	28178HS42	3569.507	53	221.142
6 R2	2	6	28178	356	LR	LR S	HS	28178HS42	3569.507	53	638.102
6 R2	2	6	28178	356	LR	LR S	HS	28178HS42	3569.507	53	271.393
6 R2	2	6	28178	356	LR	LR S	HS	28178HS42	3569.507	53	281.163
6 R2	2	6	28178	356	LR	LR S	HS	28178HS42	3569.507	53	328.622
6 R2	2	6	28178	356	LR	LR S	HS	28178HS42	3569.507	53	348.364
6 R2	2	6	28178	356	LR	LR S	HS	28178HS42	3569.507	53	393.429
6 R2	2	6	28178	356	LR	LR S	HS	28178HS42	3569.507	53	189.237
6 R2	2	6	28178	356	LR	LR S	HS	28178HS42	3569.507	53	242.479
6 R2	2	6	28178	356	LR	LR S	HS	28178HS42	3569.507	53	155.537
6 R2	2	6	28178	356	LR	LR S	HS	28178HS42	3569.507	53	158.728
6 R2	2	6	28178	356	LR	LR S	HS	28178HS42	3569.507	53	143.772
6 R2	2	6	28178	356	LR	LR S	HS	28178HS42	3569.507	53	149.954
6 R2	2	6	28178	356	LR	LR S	HS	28178HS42	3569.507	53	177.671
6 R2	2	6	28178	356	LR	LR S	HS	28178HS42	3569.507	53	196.017
6 R2	2	6	28178	356	LR	LR S	HS	28178HS42	3569.507	53	194.222
6 R2	2	6	28178	356	LR	LR S	HS	28178HS42	3569.507	53	247.863
6 R2	2	6	28178	356	LR	LR S	HS	28178HS42	3569.507	53	129.814
6 R2	2	6	28178	356	LR	LR S	HS	28178HS42	3569.507	53	97.909
6 R2	2	6	28178	356	LR	LR S	HS	28178HS42	3569.507	53	147.362
6 R2	2	6	28178	356	LR	LR S	HS	28178HS42	3569.507	53	473.99
6 R2	2	6	28178	356	LR	LR S	HS	28178HS42	3569.507	53	218.55
6 R2	2	6	28178	356	LR	LR S	HS	28178HS52	3645.756	1	263.815
6 R2	2	6	28178	356	LR	LR S	HS	28178HS52	3645.756	1	382.063
6 R2	2	6	28178	356	LR	LR S	HS	28178HS52	3645.756	1	395.424
6 R2	2	6	28178	356	LR	LR S	HS	28178HS52	3645.756	1	453.85
6 R2	2	6	28178	356	LR	LR S	HS	28178HS52	3645.756	1	290.137
6 R2	2	6	28178	356	LR	LR S	HS	28178HS52	3645.756	1	361.325
6 R2	2	6	28178	356	LR	LR S	HS	28178HS52	3645.756	1	228.72
6 R2	2	6	28178	356	LR	LR S	HS	28178HS52	3645.756	1	74.578
6 R2	2	6	28178	356	LR	LR S	HS	28178HS52	3645.756	1	285.152
6 R2	2	6	28178	356	LR	LR S	HS	28178HS52	3645.756	1	202.597
6 R2	2	6	28178	356	LR	LR S	HS	28178HS52	3645.756	1	174.88
6 R2	2	6	28178	356	LR	LR S	HS	28178HS52	3645.756	1	523.841
6 R2	2	6	28178	356	LR	LR S	HS	28178HS52	3645.756	1	170.493
6 R2	2	6	28178	356	LR	LR S	HS	28178HS52	3645.756	1	190.234
6 R2	2	6	28178	356	LR	LR S	HS	28178HS52	3645.756	1	306.688
6 R2	2	6	28178	356	LR	LR S	HS	28178HS52	3645.756	1	136.195
6 R2	2	6	28178	356	LR	LR S	HS	28178HS52	3645.756	1	471.996
6 R2	2	6	28178	356	LR	LR S	HS	28178HS52	3645.756	1	113.064
6 R2	2	6	28178	356	LR	LR S	HS	28178HS52	3645.756	1	229.118
6 R2	2	6	28178	356	LR	LR S	HS	28178HS52	3645.756	1	248.062
6 R2	2	6	28178	356	LR	LR S	HS	28178HS52	3645.756	1	225.33
6 R2	2	6	28178	356	LR	LR S	HS	28178HS52	3645.756	1	178.469
6 R2	2	6	28178	356	LR	LR S	HS	28178HS52	3645.756	1	249.059
6 R2	2	6	28178	356	LR	LR S	HS	28178HS52	3645.756	1	356.739
6 R2	2	6	28178	356	LR	LR S	HS	28178HS52	3645.756	1	227.722
6 R2	2	6	28178	356	LR	LR S	HS	28178HS52	3645.756	1	181.859
6 R2	2	6	28178	356	LR	LR S	HS	28178HS52	3645.756	1	147.76
6 R2	2	6	28178	356	LR	LR S	HS	28178HS52	3645.756	1	178.868
6 R2	2	6	28178	356	LR	LR S	HS	28178HS52	3645.756	1	125.626
6 R2	2	6	28178	356	LR	LR S	HS	28178HS52	3645.756	1	152.546
6 R2	2	6	28178	356	LR	LR S	HS	28178HS62	4288.497	0	486.951
6 R2	2	6	28178	356	LR	LR S	HS	28178HS62	4288.497	0	299.309
6 R2	2	6	28178	356	LR	LR S	HS	28178HS62	4288.497	0	242.877
6 R2	2	6	28178	356	LR	LR S	HS	28178HS62	4288.497	0	281.961
6 R2	2	6	28178	356	LR	LR S	HS	28178HS62	4288.497	0	214.562
6 R2	2	6	28178	356	LR	LR S	HS	28178HS62	4288.497	0	304.693
6 R2	2	6	28178	356	LR	LR S	HS	28178HS62	4288.497	0	431.317
6 R2	2	6	28178	356	LR	LR S	HS	28178HS62	4288.497	0	279.967
6 R2	2	6	28178	356	LR	LR S	HS	28178HS62	4288.497	0	366.31
6 R2	2	6	28178	356	LR	LR S	HS	28178HS62	4288.497	0	292.928
6 R2	2	6	28178	356	LR	LR S	HS	28178HS62	4288.497	0	218.55
6 R2	2	6	28178	356	LR	LR S	HS	28178HS62	4288.497	0	268.601
6 R2	2	6	28178	356	LR	LR S	HS	28178HS62	4288.497	0	347.167
6 R2	2	6	28178	356	LR	LR S	HS	28178HS62	4288.497	0	170.692
6 R2	2	6	28178	356	LR	LR S	HS	28178HS62	4288.497	0	137.192
6 R2	2	6	28178	356	LR	LR S	HS	28178HS62	4288.497	0	159.127
6 R2	2	6	28178	356	LR	LR S	HS	28178HS62	4288.497	0	147.362
6 R2	2	6	28178	356	LR	LR S	HS	28178HS62	4288.497	0	144.171
6 R2	2	6	28178	356	LR	LR S	HS	28178HS62	4288.497	0	231.711
6 R2	2	6	28178	356	LR	LR S	HS	28178HS62	4288.497	0	140.582
6 R2	2	6	28178	356	LR	LR S	HS	28178HS62	4288.497	0	224.532
6 R2	2	6	28178	356	LR	LR S	HS	28178HS62	4288.497	0	324.834
6 R2	2	6	28178	356	LR	LR S	HS	28178HS62	4288.497	0	272.788
6 R2	2	6	28178	356	LR	LR S	HS	28178HS62	4288.497	0	274.384
6 R2	2	6	28178	356	LR	LR S	HS	28178HS62	4288.497	0	244.871
6 R2	2	6	28178	356	LR	LR S	HS	28178HS62	4288.497	0	335.801
6 R2	2	6	28178	356	LR	LR S	HS	28178HS62	4288.497	0	188.639
6 R2	2	6	28178	356	LR	LR S	HS	28178HS62	4288.497	0	375.283
6 R2	2	6	28178	356	LR	LR S	HS	28178HS62	4288.497	0	404.796
6 R2	2	6	28178	356	LR	LR S	HS	28178HS62	4288.497	0	360.926
6 R2	2	6	28178	356	LR	LR S	HS	28178HS72	3948.803	0	161.719
6 R2	2	6	28178	356	LR	LR S	HS	28178HS72	3948.803	0	191.032
6 R2	2	6	28178	356	LR	LR S	HS	28178HS72	3948.803	0	126.224
6 R2	2	6	28178	356	LR	LR S	HS	28178HS72	3948.803	0	242.877
6 R2	2	6	28178	356	LR	LR S	HS	28178HS72	3948.803	0	104.489
6 R2	2	6	28178	356	LR	LR S	HS	28178HS72	3948.803	0	114.26
6 R2	2	6	28178	356	LR	LR S	HS	28178HS72	3948.803	0	111.07
6 R2	2	6	28178	356	LR	LR S	HS	28178HS72	3948.803	0	79.962
6 R2	2	6	28178	356	LR	LR S	HS	28178HS72	3948.803	0	107.48
6 R2	2	6	28178	356	LR	LR S	HS	28178HS72	3948.803	0	117.052
6 R2	2	6	28178	356	LR	LR S	HS	28178HS72	3948.803	0	161.719
6 R2	2	6	28178	356	LR	LR S	HS	28178HS72	3948.803	0	223.734
6 R2	2	6	28178	356	LR	LR S	HS	28178HS72	3948.803	0	177.472
6 R2	2	6	28178	356	LR	LR S	HS	28178HS72	3948.803	0	174.88
6 R2	2	6	28178	356	LR	LR S	HS	28178HS72	3948.803	0	101.897
6 R2	2	6	28178	356	LR	LR S	HS	28178HS72	3948.803	0	138.787
6 R2	2	6	28178	356	LR	LR S	HS	28178HS72	3948.803	0	155.138
6 R2	2	6	28178	356	LR	LR S	HS	28178HS72	3948.803	0	265.012
6 R2	2	6	28178	356	LR	LR S	HS	28178HS72	3948.803	0	88.736
6 R2	2	6	28178	356	LR	LR S	HS	28178HS72	3948.803	0	152.546
6 R2	2	6	28178	356	LR	LR S	HS	28178HS72	3948.803	0	122.635
6 R2	2	6	28178	356	LR	LR S	HS	28178HS72	3948.803	0	118.647
6 R2	2	6	28178	356	LR	LR S	HS	28178HS72	3948.803	0	118.248
6 R2	2	6	28178	356	LR	LR S	HS	28178HS72	3948.803	0	161.32
6 R2	2	6	28178	356	LR	LR S	HS	28178HS72	3948.803	0	147.162
6 R2	2	6	28178	356	LR	LR S	HS	28178HS72	3948.803	0	180.862
6 R2	2	6	28178	356	LR	LR S	HS	28178HS72	3948.803	0	215.758
6 R2	2	6	28178	356	LR	LR S	HS	28178HS72	3948.803	0	267.205
6 R2	2	6	28178	356	LR	LR S	HS	28178HS72	3948.803	0	319.051
6 R2	2	6	28178	356	LR	LR S	HS	28178HS72	3948.803	0	205.19
6 R2	2	6	28178	356	LR	LR S	HS	28178HS82	3369.973	52	242.279
6 R2	2	6	28178	356	LR	LR S	HS	28178HS82	3369.973	52	169.296
6 R2	2	6	28178	356	LR	LR S	HS	28178HS82	3369.973	52	134.799
6 R2	2	6	28178	356	LR	LR S	HS	28178HS82	3369.973	52	205.588
6 R2	2	6	28178	356	LR	LR S	HS	28178HS82	3369.973	52	216.755
6 R2	2	6	28178	356	LR	LR S	HS	28178HS82	3369.973	52	138.787
6 R2	2	6	28178	356	LR	LR S	HS	28178HS82	3369.973	52	152.945
6 R2	2	6	28178	356	LR	LR S	HS	28178HS82	3369.973	52	174.88
6 R2	2	6	28178	356	LR	LR S	HS	28178HS82	3369.973	52	208.579
6 R2	2	6	28178	356	LR	LR S	HS	28178HS82	3369.973	52	166.305
6 R2	2	6	28178	356	LR	LR S	HS	28178HS82	3369.973	52	190.433
6 R2	2	6	28178	356	LR	LR S	HS	28178HS82	3369.973	52	173.085
6 R2	2	6	28178	356	LR	LR S	HS	28178HS82	3369.973	52	174.281
6 R2	2	6	28178	356	LR	LR S	HS	28178HS82	3369.973	52	181.261
6 R2	2	6	28178	356	LR	LR S	HS	28178HS82	3369.973	52	167.9
6 R2	2	6	28178	356	LR	LR S	HS	28178HS82	3369.973	52	98.507
6 R2	2	6	28178	356	LR	LR S	HS	28178HS82	3369.973	52	329.619
6 R2	2	6	28178	356	LR	LR S	HS	28178HS82	3369.973	52	159.326
6 R2	2	6	28178	356	LR	LR S	HS	28178HS82	3369.973	52	172.487
6 R2	2	6	28178	356	LR	LR S	HS	28178HS82	3369.973	52	180.264
6 R2	2	6	28178	356	LR	LR S	HS	28178HS82	3369.973	52	233.705
6 R2	2	6	28178	356	LR	LR S	HS	28178HS82	3369.973	52	211.969
6 R2	2	6	28178	356	LR	LR S	HS	28178HS82	3369.973	52	293.128
6 R2	2	6	28178	356	LR	LR S	HS	28178HS82	3369.973	52	446.472
6 R2	2	6	28178	356	LR	LR S	HS	28178HS82	3369.973	52	184.252
6 R2	2	6	28178	356	LR	LR S	HS	28178HS82	3369.973	52	136.793
6 R2	2	6	28178	356	LR	LR S	HS	28178HS82	3369.973	52	246.068
6 R2	2	6	28178	356	LR	LR S	HS	28178HS82	3369.973	52	301.104
6 R2	2	6	28178	356	LR	LR S	HS	28178HS82	3369.973	52	315.063
6 R2	2	6	28178	356	LR	LR S	HS	28178HS82	3369.973	52	240.086
6 R2	2	6	28178	356	LR	LR S	HS	28178HS92	3527.462	40	228.121
6 R2	2	6	28178	356	LR	LR S	HS	28178HS92	3527.462	40	236.696
6 R2	2	6	28178	356	LR	LR S	HS	28178HS92	3527.462	40	284.553
6 R2	2	6	28178	356	LR	LR S	HS	28178HS92	3527.462	40	216.356
6 R2	2	6	28178	356	LR	LR S	HS	28178HS92	3527.462	40	288.143
6 R2	2	6	28178	356	LR	LR S	HS	28178HS92	3527.462	40	255.041
6 R2	2	6	28178	356	LR	LR S	HS	28178HS92	3527.462	40	189.237
6 R2	2	6	28178	356	LR	LR S	HS	28178HS92	3527.462	40	246.666
6 R2	2	6	28178	356	LR	LR S	HS	28178HS92	3527.462	40	351.355
6 R2	2	6	28178	356	LR	LR S	HS	28178HS92	3527.462	40	197.213
6 R2	2	6	28178	356	LR	LR S	HS	28178HS92	3527.462	40	187.841
6 R2	2	6	28178	356	LR	LR S	HS	28178HS92	3527.462	40	187.243
6 R2	2	6	28178	356	LR	LR S	HS	28178HS92	3527.462	40	375.084
6 R2	2	6	28178	356	LR	LR S	HS	28178HS92	3527.462	40	138.787
6 R2	2	6	28178	356	LR	LR S	HS	28178HS92	3527.462	40	233.106
6 R2	2	6	28178	356	LR	LR S	HS	28178HS92	3527.462	40	224.931
6 R2	2	6	28178	356	LR	LR S	HS	28178HS92	3527.462	40	164.311
6 R2	2	6	28178	356	LR	LR S	HS	28178HS92	3527.462	40	285.75
6 R2	2	6	28178	356	LR	LR S	HS	28178HS92	3527.462	40	113.064
6 R2	2	6	28178	356	LR	LR S	HS	28178HS92	3527.462	40	176.874
6 R2	2	6	28178	356	LR	LR S	HS	28178HS92	3527.462	40	189.436
6 R2	2	6	28178	356	LR	LR S	HS	28178HS92	3527.462	40	220.344
6 R2	2	6	28178	356	LR	LR S	HS	28178HS92	3527.462	40	95.117
6 R2	2	6	28178	356	LR	LR S	HS	28178HS92	3527.462	40	146.763
6 R2	2	6	28178	356	LR	LR S	HS	28178HS92	3527.462	40	174.082
6 R2	2	6	28178	356	LR	LR S	HS	28178HS92	3527.462	40	228.72
6 R2	2	6	28178	356	LR	LR S	HS	28178HS92	3527.462	40	199.008
6 R2	2	6	28178	356	LR	LR S	HS	28178HS92	3527.462	40	197.811
6 R2	2	6	28178	356	LR	LR S	HS	28178HS92	3527.462	40	171.29
6 R2	2	6	28178	356	LR	LR S	HS	28178HS92	3527.462	40	117.65
6 R2	2	6	28178	356	LR	LR S	HY	28178HY12	4104.835	42	308.881
6 R2	2	6	28178	356	LR	LR S	HY	28178HY12	4104.835	42	225.33
6 R2	2	6	28178	356	LR	LR S	HY	28178HY12	4104.835	42	116.653
6 R2	2	6	28178	356	LR	LR S	HY	28178HY12	4104.835	42	102.894
6 R2	2	6	28178	356	LR	LR S	HY	28178HY12	4104.835	42	108.278
6 R2	2	6	28178	356	LR	LR S	HY	28178HY12	4104.835	42	164.71
6 R2	2	6	28178	356	LR	LR S	HY	28178HY12	4104.835	42	132.805
6 R2	2	6	28178	356	LR	LR S	HY	28178HY12	4104.835	42	147.162
6 R2	2	6	28178	356	LR	LR S	HY	28178HY12	4104.835	42	106.284
6 R2	2	6	28178	356	LR	LR S	HY	28178HY12	4104.835	42	313.467
6 R2	2	6	28178	356	LR	LR S	HY	28178HY12	4104.835	42	316.857
6 R2	2	6	28178	356	LR	LR S	HY	28178HY12	4104.835	42	187.841
6 R2	2	6	28178	356	LR	LR S	HY	28178HY12	4104.835	42	178.07
6 R2	2	6	28178	356	LR	LR S	HY	28178HY12	4104.835	42	263.815
6 R2	2	6	28178	356	LR	LR S	HY	28178HY12	4104.835	42	222.538
6 R2	2	6	28178	356	LR	LR S	HY	28178HY12	4104.835	42	129.016
6 R2	2	6	28178	356	LR	LR S	HY	28178HY12	4104.835	42	230.913
6 R2	2	6	28178	356	LR	LR S	HY	28178HY12	4104.835	42	388.843
6 R2	2	6	28178	356	LR	LR S	HY	28178HY12	4104.835	42	305.89
6 R2	2	6	28178	356	LR	LR S	HY	28178HY12	4104.835	42	202.797
6 R2	2	6	28178	356	LR	LR S	HY	28178HY12	4104.835	42	141.379
6 R2	2	6	28178	356	LR	LR S	HY	28178HY12	4104.835	42	223.136
6 R2	2	6	28178	356	LR	LR S	HY	28178HY12	4104.835	42	180.463
6 R2	2	6	28178	356	LR	LR S	HY	28178HY12	4104.835	42	168.299
6 R2	2	6	28178	356	LR	LR S	HY	28178HY12	4104.835	42	130.811
6 R2	2	6	28178	356	LR	LR S	HY	28178HY12	4104.835	42	217.952
6 R2	2	6	28178	356	LR	LR S	HY	28178HY12	4104.835	42	147.162
6 R2	2	6	28178	356	LR	LR S	HY	28178HY12	4104.835	42	152.147
6 R2	2	6	28178	356	LR	LR S	HY	28178HY12	4104.835	42	92.325
6 R2	2	6	28178	356	LR	LR S	HY	28178HY12	4104.835	42	119.445
6 R2	2	6	28178	356	LR	LR S	HY	28178HY22	3663.053	70	84.748
6 R2	2	6	28178	356	LR	LR S	HY	28178HY22	3663.053	70	118.248
6 R2	2	6	28178	356	LR	LR S	HY	28178HY22	3663.053	70	110.073
6 R2	2	6	28178	356	LR	LR S	HY	28178HY22	3663.053	70	183.454
6 R2	2	6	28178	356	LR	LR S	HY	28178HY22	3663.053	70	206.386
6 R2	2	6	28178	356	LR	LR S	HY	28178HY22	3663.053	70	102.694
6 R2	2	6	28178	356	LR	LR S	HY	28178HY22	3663.053	70	120.641
6 R2	2	6	28178	356	LR	LR S	HY	28178HY22	3663.053	70	114.459
6 R2	2	6	28178	356	LR	LR S	HY	28178HY22	3663.053	70	118.647
6 R2	2	6	28178	356	LR	LR S	HY	28178HY22	3663.053	70	262.419
6 R2	2	6	28178	356	LR	LR S	HY	28178HY22	3663.053	70	164.909
6 R2	2	6	28178	356	LR	LR S	HY	28178HY22	3663.053	70	105.087
6 R2	2	6	28178	356	LR	LR S	HY	28178HY22	3663.053	70	93.123
6 R2	2	6	28178	356	LR	LR S	HY	28178HY22	3663.053	70	195.618
6 R2	2	6	28178	356	LR	LR S	HY	28178HY22	3663.053	70	221.142
6 R2	2	6	28178	356	LR	LR S	HY	28178HY22	3663.053	70	188.838
6 R2	2	6	28178	356	LR	LR S	HY	28178HY22	3663.053	70	172.487
6 R2	2	6	28178	356	LR	LR S	HY	28178HY22	3663.053	70	111.867
6 R2	2	6	28178	356	LR	LR S	HY	28178HY22	3663.053	70	84.548
6 R2	2	6	28178	356	LR	LR S	HY	28178HY22	3663.053	70	160.124
6 R2	2	6	28178	356	LR	LR S	HY	28178HY22	3663.053	70	188.838
6 R2	2	6	28178	356	LR	LR S	HY	28178HY22	3663.053	70	100.102
6 R2	2	6	28178	356	LR	LR S	HY	28178HY22	3663.053	70	156.734
6 R2	2	6	28178	356	LR	LR S	HY	28178HY22	3663.053	70	209.377
6 R2	2	6	28178	356	LR	LR S	HY	28178HY22	3663.053	70	82.554
6 R2	2	6	28178	356	LR	LR S	HY	28178HY22	3663.053	70	371.495
6 R2	2	6	28178	356	LR	LR S	HY	28178HY22	3663.053	70	118.647
6 R2	2	6	28178	356	LR	LR S	HY	28178HY22	3663.053	70	82.355
6 R2	2	6	28178	356	LR	LR S	HY	28178HY22	3663.053	70	124.629
6 R2	2	6	28178	356	LR	LR S	HY	28178HY22	3663.053	70	143.972
6 R2	2	6	28178	356	LR	LR S	HY	28178HY32	4071.495	67	100.9
6 R2	2	6	28178	356	LR	LR S	HY	28178HY32	4071.495	67	136.793
6 R2	2	6	28178	356	LR	LR S	HY	28178HY32	4071.495	67	108.278
6 R2	2	6	28178	356	LR	LR S	HY	28178HY32	4071.495	67	72.584
6 R2	2	6	28178	356	LR	LR S	HY	28178HY32	4071.495	67	99.105
6 R2	2	6	28178	356	LR	LR S	HY	28178HY32	4071.495	67	154.141
6 R2	2	6	28178	356	LR	LR S	HY	28178HY32	4071.495	67	99.305
6 R2	2	6	28178	356	LR	LR S	HY	28178HY32	4071.495	67	118.248
6 R2	2	6	28178	356	LR	LR S	HY	28178HY32	4071.495	67	130.611
6 R2	2	6	28178	356	LR	LR S	HY	28178HY32	4071.495	67	145.368
6 R2	2	6	28178	356	LR	LR S	HY	28178HY32	4071.495	67	133.603
6 R2	2	6	28178	356	LR	LR S	HY	28178HY32	4071.495	67	171.29
6 R2	2	6	28178	356	LR	LR S	HY	28178HY32	4071.495	67	115.058
6 R2	2	6	28178	356	LR	LR S	HY	28178HY32	4071.495	67	142.177
6 R2	2	6	28178	356	LR	LR S	HY	28178HY32	4071.495	67	143.573
6 R2	2	6	28178	356	LR	LR S	HY	28178HY32	4071.495	67	122.037
6 R2	2	6	28178	356	LR	LR S	HY	28178HY32	4071.495	67	89.932
6 R2	2	6	28178	356	LR	LR S	HY	28178HY32	4071.495	67	108.477
6 R2	2	6	28178	356	LR	LR S	HY	28178HY32	4071.495	67	172.686
6 R2	2	6	28178	356	LR	LR S	HY	28178HY32	4071.495	67	72.185
6 R2	2	6	28178	356	LR	LR S	HY	28178HY32	4071.495	67	89.135
6 R2	2	6	28178	356	LR	LR S	HY	28178HY32	4071.495	67	184.451
6 R2	2	6	28178	356	LR	LR S	HY	28178HY32	4071.495	67	91.328
6 R2	2	6	28178	356	LR	LR S	HY	28178HY32	4071.495	67	144.171
6 R2	2	6	28178	356	LR	LR S	HY	28178HY32	4071.495	67	131.01
6 R2	2	6	28178	356	LR	LR S	HY	28178HY32	4071.495	67	231.312
6 R2	2	6	28178	356	LR	LR S	HY	28178HY32	4071.495	67	230.115
6 R2	2	6	28178	356	LR	LR S	HY	28178HY32	4071.495	67	136.594
6 R2	2	6	28178	356	LR	LR S	HY	28178HY32	4071.495	67	274.782
6 R2	2	6	28178	356	LR	LR S	HY	28178HY32	4071.495	67	327.226
6 R2	2	6	28178	356	LR	LR S	HY	28178HY32	4071.495	67	242.08
6 R2	2	6	28178	356	LR	LR S	HY	28178HY32	4071.495	67	165.707
6 R2	2	6	28178	356	LR	LR S	HY	28178HY32	4071.495	67	186.246
6 R2	2	6	28178	356	LR	LR S	HY	28178HY42	4063.836	38	295.72
6 R2	2	6	28178	356	LR	LR S	HY	28178HY42	4063.836	38	195.817
6 R2	2	6	28178	356	LR	LR S	HY	28178HY42	4063.836	38	178.469
6 R2	2	6	28178	356	LR	LR S	HY	28178HY42	4063.836	38	228.321
6 R2	2	6	28178	356	LR	LR S	HY	28178HY42	4063.836	38	148.159
6 R2	2	6	28178	356	LR	LR S	HY	28178HY42	4063.836	38	102.694
6 R2	2	6	28178	356	LR	LR S	HY	28178HY42	4063.836	38	146.564
6 R2	2	6	28178	356	LR	LR S	HY	28178HY42	4063.836	38	181.859
6 R2	2	6	28178	356	LR	LR S	HY	28178HY42	4063.836	38	226.925
6 R2	2	6	28178	356	LR	LR S	HY	28178HY42	4063.836	38	113.662
6 R2	2	6	28178	356	LR	LR S	HY	28178HY42	4063.836	38	197.413
6 R2	2	6	28178	356	LR	LR S	HY	28178HY42	4063.836	38	67.599
6 R2	2	6	28178	356	LR	LR S	HY	28178HY42	4063.836	38	134.6
6 R2	2	6	28178	356	LR	LR S	HY	28178HY42	4063.836	38	131.409
6 R2	2	6	28178	356	LR	LR S	HY	28178HY42	4063.836	38	107.081
6 R2	2	6	28178	356	LR	LR S	HY	28178HY42	4063.836	38	131.608
6 R2	2	6	28178	356	LR	LR S	HY	28178HY42	4063.836	38	253.047
6 R2	2	6	28178	356	LR	LR S	HY	28178HY42	4063.836	38	162.716
6 R2	2	6	28178	356	LR	LR S	HY	28178HY42	4063.836	38	197.612
6 R2	2	6	28178	356	LR	LR S	HY	28178HY42	4063.836	38	237.493
6 R2	2	6	28178	356	LR	LR S	HY	28178HY42	4063.836	38	147.162
6 R2	2	6	28178	356	LR	LR S	HY	28178HY42	4063.836	38	170.493
6 R2	2	6	28178	356	LR	LR S	HY	28178HY42	4063.836	38	123.632
6 R2	2	6	28178	356	LR	LR S	HY	28178HY42	4063.836	38	163.514
6 R2	2	6	28178	356	LR	LR S	HY	28178HY42	4063.836	38	132.605
6 R2	2	6	28178	356	LR	LR S	HY	28178HY42	4063.836	38	163.115
6 R2	2	6	28178	356	LR	LR S	HY	28178HY52	4150.565	61	179.865
6 R2	2	6	28178	356	LR	LR S	HY	28178HY52	4150.565	61	220.943
6 R2	2	6	28178	356	LR	LR S	HY	28178HY52	4150.565	61	192.427
6 R2	2	6	28178	356	LR	LR S	HY	28178HY52	4150.565	61	213.365
6 R2	2	6	28178	356	LR	LR S	HY	28178HY52	4150.565	61	204.99
6 R2	2	6	28178	356	LR	LR S	HY	28178HY52	4150.565	61	196.615
6 R2	2	6	28178	356	LR	LR S	HY	28178HY52	4150.565	61	238.69
6 R2	2	6	28178	356	LR	LR S	HY	28178HY52	4150.565	61	155.138
6 R2	2	6	28178	356	LR	LR S	HY	28178HY52	4150.565	61	212.767
6 R2	2	6	28178	356	LR	LR S	HY	28178HY52	4150.565	61	227.722
6 R2	2	6	28178	356	LR	LR S	HY	28178HY52	4150.565	61	174.281
6 R2	2	6	28178	356	LR	LR S	HY	28178HY52	4150.565	61	201.201
6 R2	2	6	28178	356	LR	LR S	HY	28178HY52	4150.565	61	219.148
6 R2	2	6	28178	356	LR	LR S	HY	28178HY52	4150.565	61	251.053
6 R2	2	6	28178	356	LR	LR S	HY	28178HY52	4150.565	61	245.071
6 R2	2	6	28178	356	LR	LR S	HY	28178HY52	4150.565	61	206.187
6 R2	2	6	28178	356	LR	LR S	HY	28178HY52	4150.565	61	164.909
6 R2	2	6	28178	356	LR	LR S	HY	28178HY52	4150.565	61	160.722
6 R2	2	6	28178	356	LR	LR S	HY	28178HY52	4150.565	61	189.835
6 R2	2	6	28178	356	LR	LR S	HY	28178HY52	4150.565	61	173.484
6 R2	2	6	28178	356	LR	LR S	HY	28178HY52	4150.565	61	161.32
6 R2	2	6	28178	356	LR	LR S	HY	28178HY52	4150.565	61	162.118
6 R2	2	6	28178	356	LR	LR S	HY	28178HY52	4150.565	61	195.02
6 R2	2	6	28178	356	LR	LR S	HY	28178HY52	4150.565	61	184.252
6 R2	2	6	28178	356	LR	LR S	HY	28178HY52	4150.565	61	203.993
6 R2	2	6	28178	356	LR	LR S	HY	28178HY52	4150.565	61	177.472
6 R2	2	6	28178	356	LR	LR S	HY	28178HY52	4150.565	61	244.672
6 R2	2	6	28178	356	LR	LR S	HY	28178HY52	4150.565	61	242.678
6 R2	2	6	28178	356	LR	LR S	HY	28178HY52	4150.565	61	139.385
6 R2	2	6	28178	356	LR	LR S	HY	28178HY52	4150.565	61	130.412
6 R2	2	6	28178	356	LR	LR S	HY	28178HY62	3548.189	43	152.546
6 R2	2	6	28178	356	LR	LR S	HY	28178HY62	3548.189	43	134.201
6 R2	2	6	28178	356	LR	LR S	HY	28178HY62	3548.189	43	306.887
6 R2	2	6	28178	356	LR	LR S	HY	28178HY62	3548.189	43	101.299
6 R2	2	6	28178	356	LR	LR S	HY	28178HY62	3548.189	43	156.933
6 R2	2	6	28178	356	LR	LR S	HY	28178HY62	3548.189	43	117.65
6 R2	2	6	28178	356	LR	LR S	HY	28178HY62	3548.189	43	190.234
6 R2	2	6	28178	356	LR	LR S	HY	28178HY62	3548.189	43	192.228
6 R2	2	6	28178	356	LR	LR S	HY	28178HY62	3548.189	43	144.171
6 R2	2	6	28178	356	LR	LR S	HY	28178HY62	3548.189	43	139.186
6 R2	2	6	28178	356	LR	LR S	HY	28178HY62	3548.189	43	118.049
6 R2	2	6	28178	356	LR	LR S	HY	28178HY62	3548.189	43	184.451
6 R2	2	6	28178	356	LR	LR S	HY	28178HY62	3548.189	43	222.538
6 R2	2	6	28178	356	LR	LR S	HY	28178HY62	3548.189	43	166.704
6 R2	2	6	28178	356	LR	LR S	HY	28178HY62	3548.189	43	147.96
6 R2	2	6	28178	356	LR	LR S	HY	28178HY62	3548.189	43	237.693
6 R2	2	6	28178	356	LR	LR S	HY	28178HY62	3548.189	43	218.55
6 R2	2	6	28178	356	LR	LR S	HY	28178HY62	3548.189	43	331.215
6 R2	2	6	28178	356	LR	LR S	HY	28178HY62	3548.189	43	120.641
6 R2	2	6	28178	356	LR	LR S	HY	28178HY62	3548.189	43	152.147
6 R2	2	6	28178	356	LR	LR S	HY	28178HY62	3548.189	43	129.415
6 R2	2	6	28178	356	LR	LR S	HY	28178HY62	3548.189	43	240.485
6 R2	2	6	28178	356	LR	LR S	HY	28178HY62	3548.189	43	302.699
6 R2	2	6	28178	356	LR	LR S	HY	28178HY62	3548.189	43	151.15
6 R2	2	6	28178	356	LR	LR S	HY	28178HY62	3548.189	43	288.342
6 R2	2	6	28178	356	LR	LR S	HY	28178HY62	3548.189	43	319.25
6 R2	2	6	28178	356	LR	LR S	HY	28178HY62	3548.189	43	166.305
6 R2	2	6	28178	356	LR	LR S	HY	28178HY62	3548.189	43	277.574
6 R2	2	6	28178	356	LR	LR S	HY	28178HY62	3548.189	43	262.02
6 R2	2	6	28178	356	LR	LR S	HY	28178HY62	3548.189	43	254.443
6 R2	2	6	28178	356	LR	LR S	HY	28178HY72	3740.082	44	520.85
6 R2	2	6	28178	356	LR	LR S	HY	28178HY72	3740.082	44	178.868
6 R2	2	6	28178	356	LR	LR S	HY	28178HY72	3740.082	44	97.51
6 R2	2	6	28178	356	LR	LR S	HY	28178HY72	3740.082	44	137.192
6 R2	2	6	28178	356	LR	LR S	HY	28178HY72	3740.082	44	128.219
6 R2	2	6	28178	356	LR	LR S	HY	28178HY72	3740.082	44	142.177
6 R2	2	6	28178	356	LR	LR S	HY	28178HY72	3740.082	44	93.522
6 R2	2	6	28178	356	LR	LR S	HY	28178HY72	3740.082	44	231.91
6 R2	2	6	28178	356	LR	LR S	HY	28178HY72	3740.082	44	404.197
6 R2	2	6	28178	356	LR	LR S	HY	28178HY72	3740.082	44	205.588
6 R2	2	6	28178	356	LR	LR S	HY	28178HY72	3740.082	44	125.626
6 R2	2	6	28178	356	LR	LR S	HY	28178HY72	3740.082	44	242.678
6 R2	2	6	28178	356	LR	LR S	HY	28178HY72	3740.082	44	249.857
6 R2	2	6	28178	356	LR	LR S	HY	28178HY72	3740.082	44	111.867
6 R2	2	6	28178	356	LR	LR S	HY	28178HY72	3740.082	44	164.71
6 R2	2	6	28178	356	LR	LR S	HY	28178HY72	3740.082	44	181.061
6 R2	2	6	28178	356	LR	LR S	HY	28178HY72	3740.082	44	107.879
6 R2	2	6	28178	356	LR	LR S	HY	28178HY72	3740.082	44	149.754
6 R2	2	6	28178	356	LR	LR S	HY	28178HY72	3740.082	44	296.717
6 R2	2	6	28178	356	LR	LR S	HY	28178HY72	3740.082	44	114.858
6 R2	2	6	28178	356	LR	LR S	HY	28178HY72	3740.082	44	226.127
6 R2	2	6	28178	356	LR	LR S	HY	28178HY72	3740.082	44	374.286
6 R2	2	6	28178	356	LR	LR S	HY	28178HY72	3740.082	44	236.696
6 R2	2	6	28178	356	LR	LR S	HY	28178HY72	3740.082	44	93.522
6 R2	2	6	28178	356	LR	LR S	HY	28178HY72	3740.082	44	133.204
6 R2	2	6	28178	356	LR	LR S	HY	28178HY72	3740.082	44	188.838
6 R2	2	6	28178	356	LR	LR S	HY	28178HY72	3740.082	44	156.335
6 R2	2	6	28178	356	LR	LR S	HY	28178HY72	3740.082	44	185.049
6 R2	2	6	28178	356	LR	LR S	HY	28178HY72	3740.082	44	142.775
6 R2	2	6	28178	356	LR	LR S	HY	28178HY72	3740.082	44	211.969
6 R2	2	6	28178	356	LR	LR S	HY	28178HY82	3998.949	71	741.394
6 R2	2	6	28178	356	LR	LR S	HY	28178HY82	3998.949	71	349.56
6 R2	2	6	28178	356	LR	LR S	HY	28178HY82	3998.949	71	424.338
6 R2	2	6	28178	356	LR	LR S	HY	28178HY82	3998.949	71	682.17
6 R2	2	6	28178	356	LR	LR S	HY	28178HY82	3998.949	71	372.691
6 R2	2	6	28178	356	LR	LR S	HY	28178HY82	3998.949	71	272.788
6 R2	2	6	28178	356	LR	LR S	HY	28178HY82	3998.949	71	459.034
6 R2	2	6	28178	356	LR	LR S	HY	28178HY82	3998.949	71	304.893
6 R2	2	6	28178	356	LR	LR S	HY	28178HY82	3998.949	71	487.151
6 R2	2	6	28178	356	LR	LR S	HY	28178HY82	3998.949	71	565.318
6 R2	2	6	28178	356	LR	LR S	HY	28178HY82	3998.949	71	621.75
6 R2	2	6	28178	356	LR	LR S	HY	28178HY82	3998.949	71	392.233
6 R2	2	6	28178	356	LR	LR S	HY	28178HY82	3998.949	71	314.863
6 R2	2	6	28178	356	LR	LR S	HY	28178HY82	3998.949	71	259.029
6 R2	2	6	28178	356	LR	LR S	HY	28178HY82	3998.949	71	837.309
6 R2	2	6	28178	356	LR	LR S	HY	28178HY82	3998.949	71	844.487
6 R2	2	6	28178	356	LR	LR S	HY	28178HY82	3998.949	71	443.281
6 R2	2	6	28178	356	LR	LR S	HY	28178HY82	3998.949	71	506.892
6 R2	2	6	28178	356	LR	LR S	HY	28178HY82	3998.949	71	300.107
6 R2	2	6	28178	356	LR	LR S	HY	28178HY82	3998.949	71	116.852
6 R2	2	6	28178	356	LR	LR S	HY	28178HY82	3998.949	71	399.412
6 R2	2	6	28178	356	LR	LR S	HY	28178HY82	3998.949	71	449.263
6 R2	2	6	28178	356	LR	LR S	HY	28178HY82	3998.949	71	489.145
6 R2	2	6	28178	356	LR	LR S	HY	28178HY82	3998.949	71	285.75
6 R2	2	6	28178	356	LR	LR S	HY	28178HY82	3998.949	71	305.89
6 R2	2	6	28178	356	LR	LR S	HY	28178HY82	3998.949	71	462.424
6 R2	2	6	28178	356	LR	LR S	HY	28178HY82	3998.949	71	831.526
6 R2	2	6	28178	356	LR	LR S	HY	28178HY82	3998.949	71	298.113
6 R2	2	6	28178	356	LR	LR S	HY	28178HY82	3998.949	71	416.361
6 R2	2	6	28178	356	LR	LR S	HY	28178HY82	3998.949	71	177.273
6 R2	2	6	28178	356	LR	LR S	HY	28178HY92	3738.211	49	503.103
6 R2	2	6	28178	356	LR	LR S	HY	28178HY92	3738.211	49	256.437
6 R2	2	6	28178	356	LR	LR S	HY	28178HY92	3738.211	49	631.322
6 R2	2	6	28178	356	LR	LR S	HY	28178HY92	3738.211	49	405.992
6 R2	2	6	28178	356	LR	LR S	HY	28178HY92	3738.211	49	235.101
6 R2	2	6	28178	356	LR	LR S	HY	28178HY92	3738.211	49	353.947
6 R2	2	6	28178	356	LR	LR S	HY	28178HY92	3738.211	49	155.338
6 R2	2	6	28178	356	LR	LR S	HY	28178HY92	3738.211	49	180.064
6 R2	2	6	28178	356	LR	LR S	HY	28178HY92	3738.211	49	240.485
6 R2	2	6	28178	356	LR	LR S	HY	28178HY92	3738.211	49	380.269
6 R2	2	6	28178	356	LR	LR S	HY	28178HY92	3738.211	49	285.55
6 R2	2	6	28178	356	LR	LR S	HY	28178HY92	3738.211	49	508.886
6 R2	2	6	28178	356	LR	LR S	HY	28178HY92	3738.211	49	442.683
6 R2	2	6	28178	356	LR	LR S	HY	28178HY92	3738.211	49	653.855
6 R2	2	6	28178	356	LR	LR S	HY	28178HY92	3738.211	49	399.212
6 R2	2	6	28178	356	LR	LR S	HY	28178HY92	3738.211	49	424.138
6 R2	2	6	28178	356	LR	LR S	HY	28178HY92	3738.211	49	447.269
6 R2	2	6	28178	356	LR	LR S	HY	28178HY92	3738.211	49	256.238
6 R2	2	6	28178	356	LR	LR S	HY	28178HY92	3738.211	49	333.408
6 R2	2	6	28178	356	LR	LR S	HY	28178HY92	3738.211	49	481.168
6 R2	2	6	28178	356	LR	LR S	HY	28178HY92	3738.211	49	256.238
6 R2	2	6	28178	356	LR	LR S	HY	28178HY92	3738.211	49	243.077
6 R2	2	6	28178	356	LR	LR S	HY	28178HY92	3738.211	49	386.849
6 R2	2	6	28178	356	LR	LR S	HY	28178HY92	3738.211	49	374.087
6 R2	2	6	28178	356	LR	LR S	HY	28178HY92	3738.211	49	430.32
6 R2	2	6	28178	356	LR	LR S	HY	28178HY92	3738.211	49	547.571
6 R2	2	6	28178	356	LR	LR S	HY	28178HY92	3738.211	49	549.764
6 R2	2	6	28178	356	LR	LR S	HY	28178HY92	3738.211	49	539.993
6 R2	2	6	28178	356	LR	LR S	HY	28178HY92	3738.211	49	355.343
6 R2	2	6	28178	356	LR	LR S	HY	28178HY92	3738.211	49	495.526
6 R2	2	6	28178	356	LR	LR S	HY	28178HY102	4133.919	44	358.533
6 R2	2	6	28178	356	LR	LR S	HY	28178HY102	4133.919	44	348.762
6 R2	2	6	28178	356	LR	LR S	HY	28178HY102	4133.919	44	420.349
6 R2	2	6	28178	356	LR	LR S	HY	28178HY102	4133.919	44	431.516
6 R2	2	6	28178	356	LR	LR S	HY	28178HY102	4133.919	44	340.587
6 R2	2	6	28178	356	LR	LR S	HY	28178HY102	4133.919	44	287.345
6 R2	2	6	28178	356	LR	LR S	HY	28178HY102	4133.919	44	126.424
6 R2	2	6	28178	356	LR	LR S	HY	28178HY102	4133.919	44	188.439
6 R2	2	6	28178	356	LR	LR S	HY	28178HY102	4133.919	44	244.273
6 R2	2	6	28178	356	LR	LR S	HY	28178HY102	4133.919	44	253.446
6 R2	2	6	28178	356	LR	LR S	HY	28178HY102	4133.919	44	134.998
6 R2	2	6	28178	356	LR	LR S	HY	28178HY102	4133.919	44	203.195
6 R2	2	6	28178	356	LR	LR S	HY	28178HY102	4133.919	44	124.031
6 R2	2	6	28178	356	LR	LR S	HY	28178HY102	4133.919	44	149.356
6 R2	2	6	28178	356	LR	LR S	HY	28178HY102	4133.919	44	134.799
6 R2	2	6	28178	356	LR	LR S	HY	28178HY102	4133.919	44	163.314
6 R2	2	6	28178	356	LR	LR S	HY	28178HY102	4133.919	44	247.863
6 R2	2	6	28178	356	LR	LR S	HY	28178HY102	4133.919	44	123.632
6 R2	2	6	28178	356	LR	LR S	HY	28178HY102	4133.919	44	136.394
6 R2	2	6	28178	356	LR	LR S	HY	28178HY102	4133.919	44	152.945
6 R2	2	6	28178	356	LR	LR S	HY	28178HY102	4133.919	44	143.972
6 R2	2	6	28178	356	LR	LR S	HY	28178HY102	4133.919	44	154.141
6 R2	2	6	28178	356	LR	LR S	HY	28178HY102	4133.919	44	188.439
6 R2	2	6	28178	356	LR	LR S	HY	28178HY102	4133.919	44	158.927
6 R2	2	6	28178	356	LR	LR S	HY	28178HY102	4133.919	44	183.654
6 R2	2	6	28178	356	LR	LR S	HY	28178HY102	4133.919	44	197.413
6 R2	2	6	28178	356	LR	LR S	HY	28178HY102	4133.919	44	134.201
6 R2	2	6	28178	356	LR	LR S	HY	28178HY102	4133.919	44	167.103
6 R2	2	6	28178	356	LR	LR S	HY	28178HY102	4133.919	44	236.895
6 R2	2	6	28178	356	LR	LR S	HY	28178HY102	4133.919	44	232.109
7 R3	3	7	28178	356	LR	LR S	HS	28178HS13	4451.002	0	584.461
7 R3	3	7	28178	356	LR	LR S	HS	28178HS13	4451.002	0	429.921
7 R3	3	7	28178	356	LR	LR S	HS	28178HS13	4451.002	0	179.067
7 R3	3	7	28178	356	LR	LR S	HS	28178HS13	4451.002	0	419.552
7 R3	3	7	28178	356	LR	LR S	HS	28178HS13	4451.002	0	324.634
7 R3	3	7	28178	356	LR	LR S	HS	28178HS13	4451.002	0	251.053
7 R3	3	7	28178	356	LR	LR S	HS	28178HS13	4451.002	0	260.824
7 R3	3	7	28178	356	LR	LR S	HS	28178HS13	4451.002	0	366.908
7 R3	3	7	28178	356	LR	LR S	HS	28178HS13	4451.002	0	350.158
7 R3	3	7	28178	356	LR	LR S	HS	28178HS13	4451.002	0	300.107
7 R3	3	7	28178	356	LR	LR S	HS	28178HS13	4451.002	0	304.095
7 R3	3	7	28178	356	LR	LR S	HS	28178HS13	4451.002	0	297.714
7 R3	3	7	28178	356	LR	LR S	HS	28178HS13	4451.002	0	208.181
7 R3	3	7	28178	356	LR	LR S	HS	28178HS13	4451.002	0	167.302
7 R3	3	7	28178	356	LR	LR S	HS	28178HS13	4451.002	0	158.728
7 R3	3	7	28178	356	LR	LR S	HS	28178HS13	4451.002	0	219.547
7 R3	3	7	28178	356	LR	LR S	HS	28178HS13	4451.002	0	168.1
7 R3	3	7	28178	356	LR	LR S	HS	28178HS13	4451.002	0	149.156
7 R3	3	7	28178	356	LR	LR S	HS	28178HS13	4451.002	0	201.8
7 R3	3	7	28178	356	LR	LR S	HS	28178HS13	4451.002	0	183.853
7 R3	3	7	28178	356	LR	LR S	HS	28178HS13	4451.002	0	149.754
7 R3	3	7	28178	356	LR	LR S	HS	28178HS13	4451.002	0	121.838
7 R3	3	7	28178	356	LR	LR S	HS	28178HS13	4451.002	0	113.662
7 R3	3	7	28178	356	LR	LR S	HS	28178HS13	4451.002	0	96.513
7 R3	3	7	28178	356	LR	LR S	HS	28178HS13	4451.002	0	177.671
7 R3	3	7	28178	356	LR	LR S	HS	28178HS13	4451.002	0	171.689
7 R3	3	7	28178	356	LR	LR S	HS	28178HS13	4451.002	0	329.221
7 R3	3	7	28178	356	LR	LR S	HS	28178HS13	4451.002	0	197.213
7 R3	3	7	28178	356	LR	LR S	HS	28178HS13	4451.002	0	253.845
7 R3	3	7	28178	356	LR	LR S	HS	28178HS13	4451.002	0	159.525
7 R3	3	7	28178	356	LR	LR S	HS	28178HS23	5249.214	0	412.373
7 R3	3	7	28178	356	LR	LR S	HS	28178HS23	5249.214	0	333.408
7 R3	3	7	28178	356	LR	LR S	HS	28178HS23	5249.214	0	219.547
7 R3	3	7	28178	356	LR	LR S	HS	28178HS23	5249.214	0	181.261
7 R3	3	7	28178	356	LR	LR S	HS	28178HS23	5249.214	0	119.046
7 R3	3	7	28178	356	LR	LR S	HS	28178HS23	5249.214	0	114.659
7 R3	3	7	28178	356	LR	LR S	HS	28178HS23	5249.214	0	119.445
7 R3	3	7	28178	356	LR	LR S	HS	28178HS23	5249.214	0	141.778
7 R3	3	7	28178	356	LR	LR S	HS	28178HS23	5249.214	0	125.227
7 R3	3	7	28178	356	LR	LR S	HS	28178HS23	5249.214	0	218.55
7 R3	3	7	28178	356	LR	LR S	HS	28178HS23	5249.214	0	183.454
7 R3	3	7	28178	356	LR	LR S	HS	28178HS23	5249.214	0	268.003
7 R3	3	7	28178	356	LR	LR S	HS	28178HS23	5249.214	0	192.029
7 R3	3	7	28178	356	LR	LR S	HS	28178HS23	5249.214	0	153.543
7 R3	3	7	28178	356	LR	LR S	HS	28178HS23	5249.214	0	251.651
7 R3	3	7	28178	356	LR	LR S	HS	28178HS23	5249.214	0	212.169
7 R3	3	7	28178	356	LR	LR S	HS	28178HS23	5249.214	0	289.14
7 R3	3	7	28178	356	LR	LR S	HS	28178HS23	5249.214	0	168.698
7 R3	3	7	28178	356	LR	LR S	HS	28178HS23	5249.214	0	190.035
7 R3	3	7	28178	356	LR	LR S	HS	28178HS23	5249.214	0	213.365
7 R3	3	7	28178	356	LR	LR S	HS	28178HS23	5249.214	0	146.963
7 R3	3	7	28178	356	LR	LR S	HS	28178HS23	5249.214	0	427.727
7 R3	3	7	28178	356	LR	LR S	HS	28178HS23	5249.214	0	258.631
7 R3	3	7	28178	356	LR	LR S	HS	28178HS23	5249.214	0	223.535
7 R3	3	7	28178	356	LR	LR S	HS	28178HS23	5249.214	0	269
7 R3	3	7	28178	356	LR	LR S	HS	28178HS23	5249.214	0	187.841
7 R3	3	7	28178	356	LR	LR S	HS	28178HS23	5249.214	0	185.448
7 R3	3	7	28178	356	LR	LR S	HS	28178HS23	5249.214	0	177.472
7 R3	3	7	28178	356	LR	LR S	HS	28178HS23	5249.214	0	317.256
7 R3	3	7	28178	356	LR	LR S	HS	28178HS23	5249.214	0	334.604
7 R3	3	7	28178	356	LR	LR S	HS	28178HS33	4417.349	48	109.075
7 R3	3	7	28178	356	LR	LR S	HS	28178HS33	4417.349	48	325.631
7 R3	3	7	28178	356	LR	LR S	HS	28178HS33	4417.349	48	139.984
7 R3	3	7	28178	356	LR	LR S	HS	28178HS33	4417.349	48	145.567
7 R3	3	7	28178	356	LR	LR S	HS	28178HS33	4417.349	48	236.098
7 R3	3	7	28178	356	LR	LR S	HS	28178HS33	4417.349	48	284.155
7 R3	3	7	28178	356	LR	LR S	HS	28178HS33	4417.349	48	167.9
7 R3	3	7	28178	356	LR	LR S	HS	28178HS33	4417.349	48	159.525
7 R3	3	7	28178	356	LR	LR S	HS	28178HS33	4417.349	48	447.07
7 R3	3	7	28178	356	LR	LR S	HS	28178HS33	4417.349	48	177.871
7 R3	3	7	28178	356	LR	LR S	HS	28178HS33	4417.349	48	189.636
7 R3	3	7	28178	356	LR	LR S	HS	28178HS33	4417.349	48	354.346
7 R3	3	7	28178	356	LR	LR S	HS	28178HS33	4417.349	48	287.545
7 R3	3	7	28178	356	LR	LR S	HS	28178HS33	4417.349	48	340.786
7 R3	3	7	28178	356	LR	LR S	HS	28178HS33	4417.349	48	166.106
7 R3	3	7	28178	356	LR	LR S	HS	28178HS33	4417.349	48	173.484
7 R3	3	7	28178	356	LR	LR S	HS	28178HS33	4417.349	48	215.957
7 R3	3	7	28178	356	LR	LR S	HS	28178HS33	4417.349	48	218.949
7 R3	3	7	28178	356	LR	LR S	HS	28178HS33	4417.349	48	106.882
7 R3	3	7	28178	356	LR	LR S	HS	28178HS33	4417.349	48	294.125
7 R3	3	7	28178	356	LR	LR S	HS	28178HS33	4417.349	48	144.769
7 R3	3	7	28178	356	LR	LR S	HS	28178HS33	4417.349	48	117.052
7 R3	3	7	28178	356	LR	LR S	HS	28178HS33	4417.349	48	143.772
7 R3	3	7	28178	356	LR	LR S	HS	28178HS33	4417.349	48	212.568
7 R3	3	7	28178	356	LR	LR S	HS	28178HS33	4417.349	48	134.6
7 R3	3	7	28178	356	LR	LR S	HS	28178HS33	4417.349	48	161.121
7 R3	3	7	28178	356	LR	LR S	HS	28178HS33	4417.349	48	148.757
7 R3	3	7	28178	356	LR	LR S	HS	28178HS33	4417.349	48	146.365
7 R3	3	7	28178	356	LR	LR S	HS	28178HS33	4417.349	48	148.359
7 R3	3	7	28178	356	LR	LR S	HS	28178HS33	4417.349	48	165.308
7 R3	3	7	28178	356	LR	LR S	HS	28178HS43	3672.579	48	133.603
7 R3	3	7	28178	356	LR	LR S	HS	28178HS43	3672.579	48	100.102
7 R3	3	7	28178	356	LR	LR S	HS	28178HS43	3672.579	48	106.683
7 R3	3	7	28178	356	LR	LR S	HS	28178HS43	3672.579	48	156.933
7 R3	3	7	28178	356	LR	LR S	HS	28178HS43	3672.579	48	96.513
7 R3	3	7	28178	356	LR	LR S	HS	28178HS43	3672.579	48	151.15
7 R3	3	7	28178	356	LR	LR S	HS	28178HS43	3672.579	48	122.436
7 R3	3	7	28178	356	LR	LR S	HS	28178HS43	3672.579	48	303.098
7 R3	3	7	28178	356	LR	LR S	HS	28178HS43	3672.579	48	375.084
7 R3	3	7	28178	356	LR	LR S	HS	28178HS43	3672.579	48	106.882
7 R3	3	7	28178	356	LR	LR S	HS	28178HS43	3672.579	48	200.404
7 R3	3	7	28178	356	LR	LR S	HS	28178HS43	3672.579	48	194.621
7 R3	3	7	28178	356	LR	LR S	HS	28178HS43	3672.579	48	152.546
7 R3	3	7	28178	356	LR	LR S	HS	28178HS43	3672.579	48	215.359
7 R3	3	7	28178	356	LR	LR S	HS	28178HS43	3672.579	48	194.023
7 R3	3	7	28178	356	LR	LR S	HS	28178HS43	3672.579	48	290.536
7 R3	3	7	28178	356	LR	LR S	HS	28178HS43	3672.579	48	120.043
7 R3	3	7	28178	356	LR	LR S	HS	28178HS43	3672.579	48	162.516
7 R3	3	7	28178	356	LR	LR S	HS	28178HS43	3672.579	48	172.686
7 R3	3	7	28178	356	LR	LR S	HS	28178HS43	3672.579	48	217.353
7 R3	3	7	28178	356	LR	LR S	HS	28178HS43	3672.579	48	165.508
7 R3	3	7	28178	356	LR	LR S	HS	28178HS43	3672.579	48	183.055
7 R3	3	7	28178	356	LR	LR S	HS	28178HS53	3272.084	61	116.852
7 R3	3	7	28178	356	LR	LR S	HS	28178HS53	3272.084	61	209.178
7 R3	3	7	28178	356	LR	LR S	HS	28178HS53	3272.084	61	74.578
7 R3	3	7	28178	356	LR	LR S	HS	28178HS53	3272.084	61	175.279
7 R3	3	7	28178	356	LR	LR S	HS	28178HS53	3272.084	61	133.204
7 R3	3	7	28178	356	LR	LR S	HS	28178HS53	3272.084	61	161.32
7 R3	3	7	28178	356	LR	LR S	HS	28178HS53	3272.084	61	157.531
7 R3	3	7	28178	356	LR	LR S	HS	28178HS53	3272.084	61	78.566
7 R3	3	7	28178	356	LR	LR S	HS	28178HS53	3272.084	61	190.633
7 R3	3	7	28178	356	LR	LR S	HS	28178HS53	3272.084	61	105.885
7 R3	3	7	28178	356	LR	LR S	HS	28178HS53	3272.084	61	173.484
7 R3	3	7	28178	356	LR	LR S	HS	28178HS53	3272.084	61	143.373
7 R3	3	7	28178	356	LR	LR S	HS	28178HS53	3272.084	61	124.43
7 R3	3	7	28178	356	LR	LR S	HS	28178HS53	3272.084	61	107.68
7 R3	3	7	28178	356	LR	LR S	HS	28178HS53	3272.084	61	199.806
7 R3	3	7	28178	356	LR	LR S	HS	28178HS53	3272.084	61	78.566
7 R3	3	7	28178	356	LR	LR S	HS	28178HS53	3272.084	61	114.659
7 R3	3	7	28178	356	LR	LR S	HS	28178HS53	3272.084	61	166.704
7 R3	3	7	28178	356	LR	LR S	HS	28178HS53	3272.084	61	141.579
7 R3	3	7	28178	356	LR	LR S	HS	28178HS53	3272.084	61	94.519
7 R3	3	7	28178	356	LR	LR S	HS	28178HS53	3272.084	61	127.022
7 R3	3	7	28178	356	LR	LR S	HS	28178HS53	3272.084	61	152.546
7 R3	3	7	28178	356	LR	LR S	HS	28178HS53	3272.084	61	147.362
7 R3	3	7	28178	356	LR	LR S	HS	28178HS53	3272.084	61	104.489
7 R3	3	7	28178	356	LR	LR S	HS	28178HS53	3272.084	61	109.275
7 R3	3	7	28178	356	LR	LR S	HS	28178HS53	3272.084	61	183.654
7 R3	3	7	28178	356	LR	LR S	HS	28178HS63	4070.371	61	226.526
7 R3	3	7	28178	356	LR	LR S	HS	28178HS63	4070.371	61	81.358
7 R3	3	7	28178	356	LR	LR S	HS	28178HS63	4070.371	61	91.927
7 R3	3	7	28178	356	LR	LR S	HS	28178HS63	4070.371	61	79.962
7 R3	3	7	28178	356	LR	LR S	HS	28178HS63	4070.371	61	81.557
7 R3	3	7	28178	356	LR	LR S	HS	28178HS63	4070.371	61	201.6
7 R3	3	7	28178	356	LR	LR S	HS	28178HS63	4070.371	61	85.147
7 R3	3	7	28178	356	LR	LR S	HS	28178HS63	4070.371	61	137.391
7 R3	3	7	28178	356	LR	LR S	HS	28178HS63	4070.371	61	93.322
7 R3	3	7	28178	356	LR	LR S	HS	28178HS63	4070.371	61	89.334
7 R3	3	7	28178	356	LR	LR S	HS	28178HS63	4070.371	61	271.592
7 R3	3	7	28178	356	LR	LR S	HS	28178HS63	4070.371	61	98.706
7 R3	3	7	28178	356	LR	LR S	HS	28178HS63	4070.371	61	76.772
7 R3	3	7	28178	356	LR	LR S	HS	28178HS63	4070.371	61	59.423
7 R3	3	7	28178	356	LR	LR S	HS	28178HS63	4070.371	61	129.415
7 R3	3	7	28178	356	LR	LR S	HS	28178HS63	4070.371	61	186.844
7 R3	3	7	28178	356	LR	LR S	HS	28178HS63	4070.371	61	81.358
7 R3	3	7	28178	356	LR	LR S	HS	28178HS63	4070.371	61	109.873
7 R3	3	7	28178	356	LR	LR S	HS	28178HS63	4070.371	61	97.51
7 R3	3	7	28178	356	LR	LR S	HS	28178HS63	4070.371	61	242.678
7 R3	3	7	28178	356	LR	LR S	HS	28178HS63	4070.371	61	30.31
7 R3	3	7	28178	356	LR	LR S	HS	28178HS63	4070.371	61	151.15
7 R3	3	7	28178	356	LR	LR S	HS	28178HS63	4070.371	61	107.879
7 R3	3	7	28178	356	LR	LR S	HS	28178HS63	4070.371	61	85.944
7 R3	3	7	28178	356	LR	LR S	HS	28178HS63	4070.371	61	40.081
7 R3	3	7	28178	356	LR	LR S	HS	28178HS63	4070.371	61	58.027
7 R3	3	7	28178	356	LR	LR S	HS	28178HS63	4070.371	61	73.98
7 R3	3	7	28178	356	LR	LR S	HS	28178HS63	4070.371	61	112.665
7 R3	3	7	28178	356	LR	LR S	HS	28178HS63	4070.371	61	129.016
7 R3	3	7	28178	356	LR	LR S	HS	28178HS63	4070.371	61	57.429
7 R3	3	7	28178	356	LR	LR S	HS	28178HS73	3307.322	48	370.498
7 R3	3	7	28178	356	LR	LR S	HS	28178HS73	3307.322	48	255.44
7 R3	3	7	28178	356	LR	LR S	HS	28178HS73	3307.322	48	176.475
7 R3	3	7	28178	356	LR	LR S	HS	28178HS73	3307.322	48	258.631
7 R3	3	7	28178	356	LR	LR S	HS	28178HS73	3307.322	48	233.505
7 R3	3	7	28178	356	LR	LR S	HS	28178HS73	3307.322	48	156.933
7 R3	3	7	28178	356	LR	LR S	HS	28178HS73	3307.322	48	225.13
7 R3	3	7	28178	356	LR	LR S	HS	28178HS73	3307.322	48	307.086
7 R3	3	7	28178	356	LR	LR S	HS	28178HS73	3307.322	48	86.543
7 R3	3	7	28178	356	LR	LR S	HS	28178HS73	3307.322	48	132.805
7 R3	3	7	28178	356	LR	LR S	HS	28178HS73	3307.322	48	133.204
7 R3	3	7	28178	356	LR	LR S	HS	28178HS73	3307.322	48	185.249
7 R3	3	7	28178	356	LR	LR S	HS	28178HS73	3307.322	48	194.82
7 R3	3	7	28178	356	LR	LR S	HS	28178HS73	3307.322	48	109.674
7 R3	3	7	28178	356	LR	LR S	HS	28178HS73	3307.322	48	211.77
7 R3	3	7	28178	356	LR	LR S	HS	28178HS73	3307.322	48	119.843
7 R3	3	7	28178	356	LR	LR S	HS	28178HS73	3307.322	48	189.636
7 R3	3	7	28178	356	LR	LR S	HS	28178HS73	3307.322	48	232.708
7 R3	3	7	28178	356	LR	LR S	HS	28178HS73	3307.322	48	204.591
7 R3	3	7	28178	356	LR	LR S	HS	28178HS73	3307.322	48	212.966
7 R3	3	7	28178	356	LR	LR S	HS	28178HS73	3307.322	48	185.847
7 R3	3	7	28178	356	LR	LR S	HS	28178HS73	3307.322	48	249.857
7 R3	3	7	28178	356	LR	LR S	HS	28178HS73	3307.322	48	121.239
7 R3	3	7	28178	356	LR	LR S	HS	28178HS73	3307.322	48	257.434
7 R3	3	7	28178	356	LR	LR S	HS	28178HS73	3307.322	48	253.845
7 R3	3	7	28178	356	LR	LR S	HS	28178HS73	3307.322	48	135.597
7 R3	3	7	28178	356	LR	LR S	HS	28178HS73	3307.322	48	163.912
7 R3	3	7	28178	356	LR	LR S	HS	28178HS73	3307.322	48	125.427
7 R3	3	7	28178	356	LR	LR S	HS	28178HS73	3307.322	48	232.708
7 R3	3	7	28178	356	LR	LR S	HS	28178HS73	3307.322	48	129.016
7 R3	3	7	28178	356	LR	LR S	HS	28178HS83	6389.221	1	218.749
7 R3	3	7	28178	356	LR	LR S	HS	28178HS83	6389.221	1	495.326
7 R3	3	7	28178	356	LR	LR S	HS	28178HS83	6389.221	1	203.993
7 R3	3	7	28178	356	LR	LR S	HS	28178HS83	6389.221	1	249.657
7 R3	3	7	28178	356	LR	LR S	HS	28178HS83	6389.221	1	224.532
7 R3	3	7	28178	356	LR	LR S	HS	28178HS83	6389.221	1	284.354
7 R3	3	7	28178	356	LR	LR S	HS	28178HS83	6389.221	1	438.296
7 R3	3	7	28178	356	LR	LR S	HS	28178HS83	6389.221	1	270.196
7 R3	3	7	28178	356	LR	LR S	HS	28178HS83	6389.221	1	309.679
7 R3	3	7	28178	356	LR	LR S	HS	28178HS83	6389.221	1	134.6
7 R3	3	7	28178	356	LR	LR S	HS	28178HS83	6389.221	1	443.68
7 R3	3	7	28178	356	LR	LR S	HS	28178HS83	6389.221	1	210.972
7 R3	3	7	28178	356	LR	LR S	HS	28178HS83	6389.221	1	329.42
7 R3	3	7	28178	356	LR	LR S	HS	28178HS83	6389.221	1	248.66
7 R3	3	7	28178	356	LR	LR S	HS	28178HS83	6389.221	1	124.23
7 R3	3	7	28178	356	LR	LR S	HS	28178HS83	6389.221	1	658.84
7 R3	3	7	28178	356	LR	LR S	HS	28178HS83	6389.221	1	326.429
7 R3	3	7	28178	356	LR	LR S	HS	28178HS83	6389.221	1	185.448
7 R3	3	7	28178	356	LR	LR S	HS	28178HS83	6389.221	1	545.776
7 R3	3	7	28178	356	LR	LR S	HS	28178HS83	6389.221	1	237.493
7 R3	3	7	28178	356	LR	LR S	HS	28178HS83	6389.221	1	286.149
7 R3	3	7	28178	356	LR	LR S	HS	28178HS83	6389.221	1	283.756
7 R3	3	7	28178	356	LR	LR S	HS	28178HS83	6389.221	1	245.47
7 R3	3	7	28178	356	LR	LR S	HS	28178HS83	6389.221	1	229.916
7 R3	3	7	28178	356	LR	LR S	HS	28178HS83	6389.221	1	261.023
7 R3	3	7	28178	356	LR	LR S	HS	28178HS83	6389.221	1	377.278
7 R3	3	7	28178	356	LR	LR S	HS	28178HS83	6389.221	1	237.892
7 R3	3	7	28178	356	LR	LR S	HS	28178HS83	6389.221	1	235.499
7 R3	3	7	28178	356	LR	LR S	HS	28178HS83	6389.221	1	217.154
7 R3	3	7	28178	356	LR	LR S	HS	28178HS83	6389.221	1	334.604
7 R3	3	7	28178	356	LR	LR S	HS	28178HS93	3562.99	67	214.562
7 R3	3	7	28178	356	LR	LR S	HS	28178HS93	3562.99	67	128.219
7 R3	3	7	28178	356	LR	LR S	HS	28178HS93	3562.99	67	87.34
7 R3	3	7	28178	356	LR	LR S	HS	28178HS93	3562.99	67	193.624
7 R3	3	7	28178	356	LR	LR S	HS	28178HS93	3562.99	67	171.091
7 R3	3	7	28178	356	LR	LR S	HS	28178HS93	3562.99	67	151.749
7 R3	3	7	28178	356	LR	LR S	HS	28178HS93	3562.99	67	195.419
7 R3	3	7	28178	356	LR	LR S	HS	28178HS93	3562.99	67	130.013
7 R3	3	7	28178	356	LR	LR S	HS	28178HS93	3562.99	67	87.34
7 R3	3	7	28178	356	LR	LR S	HS	28178HS93	3562.99	67	134.799
7 R3	3	7	28178	356	LR	LR S	HS	28178HS93	3562.99	67	218.55
7 R3	3	7	28178	356	LR	LR S	HS	28178HS93	3562.99	67	176.874
7 R3	3	7	28178	356	LR	LR S	HS	28178HS93	3562.99	67	128.817
7 R3	3	7	28178	356	LR	LR S	HS	28178HS93	3562.99	67	147.96
7 R3	3	7	28178	356	LR	LR S	HS	28178HS93	3562.99	67	214.96
7 R3	3	7	28178	356	LR	LR S	HS	28178HS93	3562.99	67	226.526
7 R3	3	7	28178	356	LR	LR S	HS	28178HS93	3562.99	67	231.112
7 R3	3	7	28178	356	LR	LR S	HS	28178HS93	3562.99	67	185.847
7 R3	3	7	28178	356	LR	LR S	HS	28178HS93	3562.99	67	216.556
7 R3	3	7	28178	356	LR	LR S	HS	28178HS93	3562.99	67	134.001
7 R3	3	7	28178	356	LR	LR S	HY	28178HY13	4269.691	0	295.321
7 R3	3	7	28178	356	LR	LR S	HY	28178HY13	4269.691	0	218.55
7 R3	3	7	28178	356	LR	LR S	HY	28178HY13	4269.691	0	298.911
7 R3	3	7	28178	356	LR	LR S	HY	28178HY13	4269.691	0	210.374
7 R3	3	7	28178	356	LR	LR S	HY	28178HY13	4269.691	0	157.93
7 R3	3	7	28178	356	LR	LR S	HY	28178HY13	4269.691	0	276.577
7 R3	3	7	28178	356	LR	LR S	HY	28178HY13	4269.691	0	263.017
7 R3	3	7	28178	356	LR	LR S	HY	28178HY13	4269.691	0	320.048
7 R3	3	7	28178	356	LR	LR S	HY	28178HY13	4269.691	0	219.347
7 R3	3	7	28178	356	LR	LR S	HY	28178HY13	4269.691	0	178.868
7 R3	3	7	28178	356	LR	LR S	HY	28178HY13	4269.691	0	236.297
7 R3	3	7	28178	356	LR	LR S	HY	28178HY13	4269.691	0	316.658
7 R3	3	7	28178	356	LR	LR S	HY	28178HY13	4269.691	0	178.868
7 R3	3	7	28178	356	LR	LR S	HY	28178HY13	4269.691	0	267.604
7 R3	3	7	28178	356	LR	LR S	HY	28178HY13	4269.691	0	216.955
7 R3	3	7	28178	356	LR	LR S	HY	28178HY13	4269.691	0	219.347
7 R3	3	7	28178	356	LR	LR S	HY	28178HY13	4269.691	0	383.858
7 R3	3	7	28178	356	LR	LR S	HY	28178HY13	4269.691	0	175.877
7 R3	3	7	28178	356	LR	LR S	HY	28178HY13	4269.691	0	211.969
7 R3	3	7	28178	356	LR	LR S	HY	28178HY13	4269.691	0	214.761
7 R3	3	7	28178	356	LR	LR S	HY	28178HY13	4269.691	0	257.035
7 R3	3	7	28178	356	LR	LR S	HY	28178HY13	4269.691	0	205.588
7 R3	3	7	28178	356	LR	LR S	HY	28178HY13	4269.691	0	195.618
7 R3	3	7	28178	356	LR	LR S	HY	28178HY13	4269.691	0	171.689
7 R3	3	7	28178	356	LR	LR S	HY	28178HY13	4269.691	0	242.08
7 R3	3	7	28178	356	LR	LR S	HY	28178HY13	4269.691	0	320.646
7 R3	3	7	28178	356	LR	LR S	HY	28178HY13	4269.691	0	196.814
7 R3	3	7	28178	356	LR	LR S	HY	28178HY13	4269.691	0	211.571
7 R3	3	7	28178	356	LR	LR S	HY	28178HY13	4269.691	0	235.101
7 R3	3	7	28178	356	LR	LR S	HY	28178HY13	4269.691	0	307.086
7 R3	3	7	28178	356	LR	LR S	HY	28178HY23	3242.121	72	209.178
7 R3	3	7	28178	356	LR	LR S	HY	28178HY23	3242.121	72	183.454
7 R3	3	7	28178	356	LR	LR S	HY	28178HY23	3242.121	72	98.108
7 R3	3	7	28178	356	LR	LR S	HY	28178HY23	3242.121	72	214.362
7 R3	3	7	28178	356	LR	LR S	HY	28178HY23	3242.121	72	72.783
7 R3	3	7	28178	356	LR	LR S	HY	28178HY23	3242.121	72	114.659
7 R3	3	7	28178	356	LR	LR S	HY	28178HY23	3242.121	72	170.493
7 R3	3	7	28178	356	LR	LR S	HY	28178HY23	3242.121	72	106.683
7 R3	3	7	28178	356	LR	LR S	HY	28178HY23	3242.121	72	188.639
7 R3	3	7	28178	356	LR	LR S	HY	28178HY23	3242.121	72	197.612
7 R3	3	7	28178	356	LR	LR S	HY	28178HY23	3242.121	72	120.84
7 R3	3	7	28178	356	LR	LR S	HY	28178HY23	3242.121	72	122.236
7 R3	3	7	28178	356	LR	LR S	HY	28178HY23	3242.121	72	275.181
7 R3	3	7	28178	356	LR	LR S	HY	28178HY23	3242.121	72	133.204
7 R3	3	7	28178	356	LR	LR S	HY	28178HY23	3242.121	72	169.296
7 R3	3	7	28178	356	LR	LR S	HY	28178HY23	3242.121	72	129.216
7 R3	3	7	28178	356	LR	LR S	HY	28178HY23	3242.121	72	154.74
7 R3	3	7	28178	356	LR	LR S	HY	28178HY23	3242.121	72	267.404
7 R3	3	7	28178	356	LR	LR S	HY	28178HY23	3242.121	72	98.507
7 R3	3	7	28178	356	LR	LR S	HY	28178HY23	3242.121	72	264.015
7 R3	3	7	28178	356	LR	LR S	HY	28178HY23	3242.121	72	320.845
7 R3	3	7	28178	356	LR	LR S	HY	28178HY23	3242.121	72	238.092
7 R3	3	7	28178	356	LR	LR S	HY	28178HY23	3242.121	72	207.981
7 R3	3	7	28178	356	LR	LR S	HY	28178HY23	3242.121	72	232.508
7 R3	3	7	28178	356	LR	LR S	HY	28178HY23	3242.121	72	264.812
7 R3	3	7	28178	356	LR	LR S	HY	28178HY23	3242.121	72	173.484
7 R3	3	7	28178	356	LR	LR S	HY	28178HY23	3242.121	72	104.29
7 R3	3	7	28178	356	LR	LR S	HY	28178HY23	3242.121	72	199.008
7 R3	3	7	28178	356	LR	LR S	HY	28178HY23	3242.121	72	156.135
7 R3	3	7	28178	356	LR	LR S	HY	28178HY23	3242.121	72	85.147
7 R3	3	7	28178	356	LR	LR S	HY	28178HY33	3084.984	68	320.447
7 R3	3	7	28178	356	LR	LR S	HY	28178HY33	3084.984	68	276.976
7 R3	3	7	28178	356	LR	LR S	HY	28178HY33	3084.984	68	210.773
7 R3	3	7	28178	356	LR	LR S	HY	28178HY33	3084.984	68	209.576
7 R3	3	7	28178	356	LR	LR S	HY	28178HY33	3084.984	68	260.226
7 R3	3	7	28178	356	LR	LR S	HY	28178HY33	3084.984	68	212.368
7 R3	3	7	28178	356	LR	LR S	HY	28178HY33	3084.984	68	263.815
7 R3	3	7	28178	356	LR	LR S	HY	28178HY33	3084.984	68	236.297
7 R3	3	7	28178	356	LR	LR S	HY	28178HY33	3084.984	68	261.821
7 R3	3	7	28178	356	LR	LR S	HY	28178HY33	3084.984	68	219.946
7 R3	3	7	28178	356	LR	LR S	HY	28178HY33	3084.984	68	252.848
7 R3	3	7	28178	356	LR	LR S	HY	28178HY33	3084.984	68	503.502
7 R3	3	7	28178	356	LR	LR S	HY	28178HY33	3084.984	68	306.289
7 R3	3	7	28178	356	LR	LR S	HY	28178HY33	3084.984	68	298.312
7 R3	3	7	28178	356	LR	LR S	HY	28178HY33	3084.984	68	312.869
7 R3	3	7	28178	356	LR	LR S	HY	28178HY33	3084.984	68	181.859
7 R3	3	7	28178	356	LR	LR S	HY	28178HY33	3084.984	68	208.38
7 R3	3	7	28178	356	LR	LR S	HY	28178HY33	3084.984	68	405.793
7 R3	3	7	28178	356	LR	LR S	HY	28178HY33	3084.984	68	236.696
7 R3	3	7	28178	356	LR	LR S	HY	28178HY33	3084.984	68	236.696
7 R3	3	7	28178	356	LR	LR S	HY	28178HY33	3084.984	68	166.505
7 R3	3	7	28178	356	LR	LR S	HY	28178HY33	3084.984	68	161.918
7 R3	3	7	28178	356	LR	LR S	HY	28178HY33	3084.984	68	189.436
7 R3	3	7	28178	356	LR	LR S	HY	28178HY33	3084.984	68	183.055
7 R3	3	7	28178	356	LR	LR S	HY	28178HY33	3084.984	68	166.903
7 R3	3	7	28178	356	LR	LR S	HY	28178HY33	3084.984	68	218.749
7 R3	3	7	28178	356	LR	LR S	HY	28178HY33	3084.984	68	332.012
7 R3	3	7	28178	356	LR	LR S	HY	28178HY33	3084.984	68	198.21
7 R3	3	7	28178	356	LR	LR S	HY	28178HY33	3084.984	68	163.912
7 R3	3	7	28178	356	LR	LR S	HY	28178HY33	3084.984	68	132.605
7 R3	3	7	28178	356	LR	LR S	HY	28178HY43	4053.088	58	499.314
7 R3	3	7	28178	356	LR	LR S	HY	28178HY43	4053.088	58	307.485
7 R3	3	7	28178	356	LR	LR S	HY	28178HY43	4053.088	58	254.044
7 R3	3	7	28178	356	LR	LR S	HY	28178HY43	4053.088	58	283.158
7 R3	3	7	28178	356	LR	LR S	HY	28178HY43	4053.088	58	286.149
7 R3	3	7	28178	356	LR	LR S	HY	28178HY43	4053.088	58	256.636
7 R3	3	7	28178	356	LR	LR S	HY	28178HY43	4053.088	58	292.928
7 R3	3	7	28178	356	LR	LR S	HY	28178HY43	4053.088	58	305.092
7 R3	3	7	28178	356	LR	LR S	HY	28178HY43	4053.088	58	421.546
7 R3	3	7	28178	356	LR	LR S	HY	28178HY43	4053.088	58	381.664
7 R3	3	7	28178	356	LR	LR S	HY	28178HY43	4053.088	58	180.862
7 R3	3	7	28178	356	LR	LR S	HY	28178HY43	4053.088	58	258.032
7 R3	3	7	28178	356	LR	LR S	HY	28178HY43	4053.088	58	237.095
7 R3	3	7	28178	356	LR	LR S	HY	28178HY43	4053.088	58	244.473
7 R3	3	7	28178	356	LR	LR S	HY	28178HY43	4053.088	58	243.276
7 R3	3	7	28178	356	LR	LR S	HY	28178HY43	4053.088	58	253.645
7 R3	3	7	28178	356	LR	LR S	HY	28178HY43	4053.088	58	274.982
7 R3	3	7	28178	356	LR	LR S	HY	28178HY43	4053.088	58	418.754
7 R3	3	7	28178	356	LR	LR S	HY	28178HY43	4053.088	58	349.759
7 R3	3	7	28178	356	LR	LR S	HY	28178HY43	4053.088	58	644.084
7 R3	3	7	28178	356	LR	LR S	HY	28178HY43	4053.088	58	337.795
7 R3	3	7	28178	356	LR	LR S	HY	28178HY43	4053.088	58	344.575
7 R3	3	7	28178	356	LR	LR S	HY	28178HY43	4053.088	58	323.637
7 R3	3	7	28178	356	LR	LR S	HY	28178HY43	4053.088	58	252.648
7 R3	3	7	28178	356	LR	LR S	HY	28178HY43	4053.088	58	385.653
7 R3	3	7	28178	356	LR	LR S	HY	28178HY43	4053.088	58	523.243
7 R3	3	7	28178	356	LR	LR S	HY	28178HY43	4053.088	58	345.572
7 R3	3	7	28178	356	LR	LR S	HY	28178HY43	4053.088	58	288.542
7 R3	3	7	28178	356	LR	LR S	HY	28178HY43	4053.088	58	290.735
7 R3	3	7	28178	356	LR	LR S	HY	28178HY43	4053.088	58	240.883
7 R3	3	7	28178	356	LR	LR S	HY	28178HY53	2921.149	34	233.705
7 R3	3	7	28178	356	LR	LR S	HY	28178HY53	2921.149	34	231.711
7 R3	3	7	28178	356	LR	LR S	HY	28178HY53	2921.149	34	179.267
7 R3	3	7	28178	356	LR	LR S	HY	28178HY53	2921.149	34	213.565
7 R3	3	7	28178	356	LR	LR S	HY	28178HY53	2921.149	34	304.095
7 R3	3	7	28178	356	LR	LR S	HY	28178HY53	2921.149	34	259.229
7 R3	3	7	28178	356	LR	LR S	HY	28178HY53	2921.149	34	208.38
7 R3	3	7	28178	356	LR	LR S	HY	28178HY53	2921.149	34	221.94
7 R3	3	7	28178	356	LR	LR S	HY	28178HY53	2921.149	34	313.268
7 R3	3	7	28178	356	LR	LR S	HY	28178HY53	2921.149	34	302.699
7 R3	3	7	28178	356	LR	LR S	HY	28178HY53	2921.149	34	379.471
7 R3	3	7	28178	356	LR	LR S	HY	28178HY53	2921.149	34	190.035
7 R3	3	7	28178	356	LR	LR S	HY	28178HY53	2921.149	34	235.101
7 R3	3	7	28178	356	LR	LR S	HY	28178HY53	2921.149	34	225.33
7 R3	3	7	28178	356	LR	LR S	HY	28178HY53	2921.149	34	236.098
7 R3	3	7	28178	356	LR	LR S	HY	28178HY53	2921.149	34	268.8
7 R3	3	7	28178	356	LR	LR S	HY	28178HY53	2921.149	34	185.847
7 R3	3	7	28178	356	LR	LR S	HY	28178HY53	2921.149	34	284.753
7 R3	3	7	28178	356	LR	LR S	HY	28178HY53	2921.149	34	268.601
7 R3	3	7	28178	356	LR	LR S	HY	28178HY53	2921.149	34	287.345
7 R3	3	7	28178	356	LR	LR S	HY	28178HY53	2921.149	34	348.962
7 R3	3	7	28178	356	LR	LR S	HY	28178HY53	2921.149	34	363.12
7 R3	3	7	28178	356	LR	LR S	HY	28178HY53	2921.149	34	345.971
7 R3	3	7	28178	356	LR	LR S	HY	28178HY53	2921.149	34	295.321
7 R3	3	7	28178	356	LR	LR S	HY	28178HY53	2921.149	34	318.054
7 R3	3	7	28178	356	LR	LR S	HY	28178HY53	2921.149	34	142.775
7 R3	3	7	28178	356	LR	LR S	HY	28178HY53	2921.149	34	192.029
7 R3	3	7	28178	356	LR	LR S	HY	28178HY53	2921.149	34	276.178
7 R3	3	7	28178	356	LR	LR S	HY	28178HY53	2921.149	34	378.075
7 R3	3	7	28178	356	LR	LR S	HY	28178HY53	2921.149	34	247.464
7 R3	3	7	28178	356	LR	LR S	HY	28178HY63	3329.423	44	205.987
7 R3	3	7	28178	356	LR	LR S	HY	28178HY63	3329.423	44	322.042
7 R3	3	7	28178	356	LR	LR S	HY	28178HY63	3329.423	44	445.674
7 R3	3	7	28178	356	LR	LR S	HY	28178HY63	3329.423	44	150.353
7 R3	3	7	28178	356	LR	LR S	HY	28178HY63	3329.423	44	215.957
7 R3	3	7	28178	356	LR	LR S	HY	28178HY63	3329.423	44	242.479
7 R3	3	7	28178	356	LR	LR S	HY	28178HY63	3329.423	44	194.222
7 R3	3	7	28178	356	LR	LR S	HY	28178HY63	3329.423	44	222.538
7 R3	3	7	28178	356	LR	LR S	HY	28178HY63	3329.423	44	365.313
7 R3	3	7	28178	356	LR	LR S	HY	28178HY63	3329.423	44	288.94
7 R3	3	7	28178	356	LR	LR S	HY	28178HY63	3329.423	44	255.639
7 R3	3	7	28178	356	LR	LR S	HY	28178HY63	3329.423	44	215.758
7 R3	3	7	28178	356	LR	LR S	HY	28178HY63	3329.423	44	177.073
7 R3	3	7	28178	356	LR	LR S	HY	28178HY63	3329.423	44	189.038
7 R3	3	7	28178	356	LR	LR S	HY	28178HY63	3329.423	44	119.245
7 R3	3	7	28178	356	LR	LR S	HY	28178HY63	3329.423	44	137.192
7 R3	3	7	28178	356	LR	LR S	HY	28178HY63	3329.423	44	185.448
7 R3	3	7	28178	356	LR	LR S	HY	28178HY63	3329.423	44	258.032
7 R3	3	7	28178	356	LR	LR S	HY	28178HY63	3329.423	44	223.934
7 R3	3	7	28178	356	LR	LR S	HY	28178HY63	3329.423	44	192.627
7 R3	3	7	28178	356	LR	LR S	HY	28178HY63	3329.423	44	269.997
7 R3	3	7	28178	356	LR	LR S	HY	28178HY63	3329.423	44	271.592
7 R3	3	7	28178	356	LR	LR S	HY	28178HY63	3329.423	44	329.221
7 R3	3	7	28178	356	LR	LR S	HY	28178HY63	3329.423	44	250.854
7 R3	3	7	28178	356	LR	LR S	HY	28178HY63	3329.423	44	134.201
7 R3	3	7	28178	356	LR	LR S	HY	28178HY63	3329.423	44	239.687
7 R3	3	7	28178	356	LR	LR S	HY	28178HY63	3329.423	44	170.293
7 R3	3	7	28178	356	LR	LR S	HY	28178HY63	3329.423	44	180.662
7 R3	3	7	28178	356	LR	LR S	HY	28178HY63	3329.423	44	118.846
7 R3	3	7	28178	356	LR	LR S	HY	28178HY63	3329.423	44	279.169
7 R3	3	7	28178	356	LR	LR S	HY	28178HY73	4015.772	46	241.282
7 R3	3	7	28178	356	LR	LR S	HY	28178HY73	4015.772	46	365.114
7 R3	3	7	28178	356	LR	LR S	HY	28178HY73	4015.772	46	222.937
7 R3	3	7	28178	356	LR	LR S	HY	28178HY73	4015.772	46	286.946
7 R3	3	7	28178	356	LR	LR S	HY	28178HY73	4015.772	46	150.353
7 R3	3	7	28178	356	LR	LR S	HY	28178HY73	4015.772	46	223.535
7 R3	3	7	28178	356	LR	LR S	HY	28178HY73	4015.772	46	222.737
7 R3	3	7	28178	356	LR	LR S	HY	28178HY73	4015.772	46	298.113
7 R3	3	7	28178	356	LR	LR S	HY	28178HY73	4015.772	46	224.532
7 R3	3	7	28178	356	LR	LR S	HY	28178HY73	4015.772	46	169.496
7 R3	3	7	28178	356	LR	LR S	HY	28178HY73	4015.772	46	354.146
7 R3	3	7	28178	356	LR	LR S	HY	28178HY73	4015.772	46	280.565
7 R3	3	7	28178	356	LR	LR S	HY	28178HY73	4015.772	46	319.25
7 R3	3	7	28178	356	LR	LR S	HY	28178HY73	4015.772	46	378.075
7 R3	3	7	28178	356	LR	LR S	HY	28178HY73	4015.772	46	306.488
7 R3	3	7	28178	356	LR	LR S	HY	28178HY73	4015.772	46	241.282
7 R3	3	7	28178	356	LR	LR S	HY	28178HY73	4015.772	46	161.121
7 R3	3	7	28178	356	LR	LR S	HY	28178HY73	4015.772	46	510.681
7 R3	3	7	28178	356	LR	LR S	HY	28178HY73	4015.772	46	445.076
7 R3	3	7	28178	356	LR	LR S	HY	28178HY73	4015.772	46	213.565
7 R3	3	7	28178	356	LR	LR S	HY	28178HY73	4015.772	46	589.247
7 R3	3	7	28178	356	LR	LR S	HY	28178HY73	4015.772	46	333.607
7 R3	3	7	28178	356	LR	LR S	HY	28178HY73	4015.772	46	707.296
7 R3	3	7	28178	356	LR	LR S	HY	28178HY73	4015.772	46	275.181
7 R3	3	7	28178	356	LR	LR S	HY	28178HY73	4015.772	46	304.893
7 R3	3	7	28178	356	LR	LR S	HY	28178HY73	4015.772	46	282.161
7 R3	3	7	28178	356	LR	LR S	HY	28178HY73	4015.772	46	224.931
7 R3	3	7	28178	356	LR	LR S	HY	28178HY73	4015.772	46	299.309
7 R3	3	7	28178	356	LR	LR S	HY	28178HY73	4015.772	46	219.946
7 R3	3	7	28178	356	LR	LR S	HY	28178HY73	4015.772	46	236.895
7 R3	3	7	28178	356	LR	LR S	HY	28178HY83	3762.373	58	222.737
7 R3	3	7	28178	356	LR	LR S	HY	28178HY83	3762.373	58	184.85
7 R3	3	7	28178	356	LR	LR S	HY	28178HY83	3762.373	58	230.315
7 R3	3	7	28178	356	LR	LR S	HY	28178HY83	3762.373	58	448.665
7 R3	3	7	28178	356	LR	LR S	HY	28178HY83	3762.373	58	95.516
7 R3	3	7	28178	356	LR	LR S	HY	28178HY83	3762.373	58	77.37
7 R3	3	7	28178	356	LR	LR S	HY	28178HY83	3762.373	58	272.19
7 R3	3	7	28178	356	LR	LR S	HY	28178HY83	3762.373	58	184.451
7 R3	3	7	28178	356	LR	LR S	HY	28178HY83	3762.373	58	196.216
7 R3	3	7	28178	356	LR	LR S	HY	28178HY83	3762.373	58	169.097
7 R3	3	7	28178	356	LR	LR S	HY	28178HY83	3762.373	58	404.796
7 R3	3	7	28178	356	LR	LR S	HY	28178HY83	3762.373	58	179.067
7 R3	3	7	28178	356	LR	LR S	HY	28178HY83	3762.373	58	151.749
7 R3	3	7	28178	356	LR	LR S	HY	28178HY83	3762.373	58	144.969
7 R3	3	7	28178	356	LR	LR S	HY	28178HY83	3762.373	58	362.123
7 R3	3	7	28178	356	LR	LR S	HY	28178HY83	3762.373	58	296.318
7 R3	3	7	28178	356	LR	LR S	HY	28178HY83	3762.373	58	206.984
7 R3	3	7	28178	356	LR	LR S	HY	28178HY83	3762.373	58	162.118
7 R3	3	7	28178	356	LR	LR S	HY	28178HY83	3762.373	58	268.8
7 R3	3	7	28178	356	LR	LR S	HY	28178HY83	3762.373	58	237.294
7 R3	3	7	28178	356	LR	LR S	HY	28178HY83	3762.373	58	211.172
7 R3	3	7	28178	356	LR	LR S	HY	28178HY83	3762.373	58	135.198
7 R3	3	7	28178	356	LR	LR S	HY	28178HY83	3762.373	58	136.793
7 R3	3	7	28178	356	LR	LR S	HY	28178HY83	3762.373	58	144.57
7 R3	3	7	28178	356	LR	LR S	HY	28178HY83	3762.373	58	138.588
7 R3	3	7	28178	356	LR	LR S	HY	28178HY83	3762.373	58	236.696
7 R3	3	7	28178	356	LR	LR S	HY	28178HY83	3762.373	58	153.344
7 R3	3	7	28178	356	LR	LR S	HY	28178HY83	3762.373	58	145.567
7 R3	3	7	28178	356	LR	LR S	HY	28178HY83	3762.373	58	155.936
7 R3	3	7	28178	356	LR	LR S	HY	28178HY83	3762.373	58	94.519
7 R3	3	7	28178	356	LR	LR S	HY	28178HY93	2930.624	35	279.967
7 R3	3	7	28178	356	LR	LR S	HY	28178HY93	2930.624	35	168.299
7 R3	3	7	28178	356	LR	LR S	HY	28178HY93	2930.624	35	229.118
7 R3	3	7	28178	356	LR	LR S	HY	28178HY93	2930.624	35	149.555
7 R3	3	7	28178	356	LR	LR S	HY	28178HY93	2930.624	35	149.754
7 R3	3	7	28178	356	LR	LR S	HY	28178HY93	2930.624	35	487.35
7 R3	3	7	28178	356	LR	LR S	HY	28178HY93	2930.624	35	250.056
7 R3	3	7	28178	356	LR	LR S	HY	28178HY93	2930.624	35	126.823
7 R3	3	7	28178	356	LR	LR S	HY	28178HY93	2930.624	35	214.562
7 R3	3	7	28178	356	LR	LR S	HY	28178HY93	2930.624	35	220.743
7 R3	3	7	28178	356	LR	LR S	HY	28178HY93	2930.624	35	268.601
7 R3	3	7	28178	356	LR	LR S	HY	28178HY93	2930.624	35	146.165
7 R3	3	7	28178	356	LR	LR S	HY	28178HY103	5053.287	0	215.758
7 R3	3	7	28178	356	LR	LR S	HY	28178HY103	5053.287	0	219.148
7 R3	3	7	28178	356	LR	LR S	HY	28178HY103	5053.287	0	229.318
7 R3	3	7	28178	356	LR	LR S	HY	28178HY103	5053.287	0	416.361
7 R3	3	7	28178	356	LR	LR S	HY	28178HY103	5053.287	0	291.931
7 R3	3	7	28178	356	LR	LR S	HY	28178HY103	5053.287	0	451.058
7 R3	3	7	28178	356	LR	LR S	HY	28178HY103	5053.287	0	524.041
7 R3	3	7	28178	356	LR	LR S	HY	28178HY103	5053.287	0	256.238
7 R3	3	7	28178	356	LR	LR S	HY	28178HY103	5053.287	0	278.771
7 R3	3	7	28178	356	LR	LR S	HY	28178HY103	5053.287	0	246.666
7 R3	3	7	28178	356	LR	LR S	HY	28178HY103	5053.287	0	178.868
7 R3	3	7	28178	356	LR	LR S	HY	28178HY103	5053.287	0	231.312
7 R3	3	7	28178	356	LR	LR S	HY	28178HY103	5053.287	0	502.704
7 R3	3	7	28178	356	LR	LR S	HY	28178HY103	5053.287	0	295.122
7 R3	3	7	28178	356	LR	LR S	HY	28178HY103	5053.287	0	339.191
7 R3	3	7	28178	356	LR	LR S	HY	28178HY103	5053.287	0	317.655
7 R3	3	7	28178	356	LR	LR S	HY	28178HY103	5053.287	0	585.658
7 R3	3	7	28178	356	LR	LR S	HY	28178HY103	5053.287	0	391.236
7 R3	3	7	28178	356	LR	LR S	HY	28178HY103	5053.287	0	205.389
7 R3	3	7	28178	356	LR	LR S	HY	28178HY103	5053.287	0	472.993
7 R3	3	7	28178	356	LR	LR S	HY	28178HY103	5053.287	0	412.573
7 R3	3	7	28178	356	LR	LR S	HY	28178HY103	5053.287	0	540.392
7 R3	3	7	28178	356	LR	LR S	HY	28178HY103	5053.287	0	419.153
7 R3	3	7	28178	356	LR	LR S	HY	28178HY103	5053.287	0	261.223
7 R3	3	7	28178	356	LR	LR S	HY	28178HY103	5053.287	0	246.267
7 R3	3	7	28178	356	LR	LR S	HY	28178HY103	5053.287	0	429.323
7 R3	3	7	28178	356	LR	LR S	HY	28178HY103	5053.287	0	205.788
7 R3	3	7	28178	356	LR	LR S	HY	28178HY103	5053.287	0	201.002
7 R3	3	7	28178	356	LR	LR S	HY	28178HY103	5053.287	0	246.866
7 R3	3	7	28178	356	LR	LR S	HY	28178HY103	5053.287	0	296.119
9 R1	1	9	25187	362	HR	HR	HS	25187HS11	3378.334	0	161.918
9 R1	1	9	25187	362	HR	HR	HS	25187HS11	3378.334	0	185.648
9 R1	1	9	25187	362	HR	HR	HS	25187HS11	3378.334	0	136.992
9 R1	1	9	25187	362	HR	HR	HS	25187HS11	3378.334	0	130.811
9 R1	1	9	25187	362	HR	HR	HS	25187HS11	3378.334	0	95.316
9 R1	1	9	25187	362	HR	HR	HS	25187HS11	3378.334	0	96.313
9 R1	1	9	25187	362	HR	HR	HS	25187HS11	3378.334	0	102.096
9 R1	1	9	25187	362	HR	HR	HS	25187HS11	3378.334	0	131.21
9 R1	1	9	25187	362	HR	HR	HS	25187HS11	3378.334	0	130.811
9 R1	1	9	25187	362	HR	HR	HS	25187HS11	3378.334	0	71.786
9 R1	1	9	25187	362	HR	HR	HS	25187HS11	3378.334	0	126.025
9 R1	1	9	25187	362	HR	HR	HS	25187HS11	3378.334	0	84.349
9 R1	1	9	25187	362	HR	HR	HS	25187HS11	3378.334	0	137.989
9 R1	1	9	25187	362	HR	HR	HS	25187HS11	3378.334	0	72.584
9 R1	1	9	25187	362	HR	HR	HS	25187HS11	3378.334	0	86.343
9 R1	1	9	25187	362	HR	HR	HS	25187HS11	3378.334	0	96.912
9 R1	1	9	25187	362	HR	HR	HS	25187HS11	3378.334	0	67.998
9 R1	1	9	25187	362	HR	HR	HS	25187HS11	3378.334	0	121.838
9 R1	1	9	25187	362	HR	HR	HS	25187HS11	3378.334	0	112.665
9 R1	1	9	25187	362	HR	HR	HS	25187HS11	3378.334	0	145.567
9 R1	1	9	25187	362	HR	HR	HS	25187HS11	3378.334	0	69.992
9 R1	1	9	25187	362	HR	HR	HS	25187HS11	3378.334	0	51.846
9 R1	1	9	25187	362	HR	HR	HS	25187HS11	3378.334	0	126.623
9 R1	1	9	25187	362	HR	HR	HS	25187HS11	3378.334	0	50.849
9 R1	1	9	25187	362	HR	HR	HS	25187HS11	3378.334	0	108.078
9 R1	1	9	25187	362	HR	HR	HS	25187HS11	3378.334	0	133.802
9 R1	1	9	25187	362	HR	HR	HS	25187HS11	3378.334	0	127.421
9 R1	1	9	25187	362	HR	HR	HS	25187HS11	3378.334	0	99.903
9 R1	1	9	25187	362	HR	HR	HS	25187HS11	3378.334	0	135.198
9 R1	1	9	25187	362	HR	HR	HS	25187HS11	3378.334	0	61.816
9 R1	1	9	25187	362	HR	HR	HS	25187HS21	2411.432	3	123.632
9 R1	1	9	25187	362	HR	HR	HS	25187HS21	2411.432	3	172.088
9 R1	1	9	25187	362	HR	HR	HS	25187HS21	2411.432	3	150.951
9 R1	1	9	25187	362	HR	HR	HS	25187HS21	2411.432	3	101.099
9 R1	1	9	25187	362	HR	HR	HS	25187HS21	2411.432	3	77.37
9 R1	1	9	25187	362	HR	HR	HS	25187HS21	2411.432	3	120.242
9 R1	1	9	25187	362	HR	HR	HS	25187HS21	2411.432	3	127.62
9 R1	1	9	25187	362	HR	HR	HS	25187HS21	2411.432	3	114.858
9 R1	1	9	25187	362	HR	HR	HS	25187HS21	2411.432	3	136.594
9 R1	1	9	25187	362	HR	HR	HS	25187HS21	2411.432	3	184.651
9 R1	1	9	25187	362	HR	HR	HS	25187HS21	2411.432	3	90.531
9 R1	1	9	25187	362	HR	HR	HS	25187HS21	2411.432	3	144.769
9 R1	1	9	25187	362	HR	HR	HS	25187HS21	2411.432	3	87.54
9 R1	1	9	25187	362	HR	HR	HS	25187HS21	2411.432	3	91.927
9 R1	1	9	25187	362	HR	HR	HS	25187HS21	2411.432	3	67.2
9 R1	1	9	25187	362	HR	HR	HS	25187HS21	2411.432	3	135.995
9 R1	1	9	25187	362	HR	HR	HS	25187HS21	2411.432	3	191.231
9 R1	1	9	25187	362	HR	HR	HS	25187HS21	2411.432	3	81.557
9 R1	1	9	25187	362	HR	HR	HS	25187HS21	2411.432	3	145.966
9 R1	1	9	25187	362	HR	HR	HS	25187HS21	2411.432	3	85.944
9 R1	1	9	25187	362	HR	HR	HS	25187HS21	2411.432	3	145.766
9 R1	1	9	25187	362	HR	HR	HS	25187HS21	2411.432	3	86.343
9 R1	1	9	25187	362	HR	HR	HS	25187HS21	2411.432	3	140.382
9 R1	1	9	25187	362	HR	HR	HS	25187HS21	2411.432	3	99.305
9 R1	1	9	25187	362	HR	HR	HS	25187HS21	2411.432	3	150.751
9 R1	1	9	25187	362	HR	HR	HS	25187HS21	2411.432	3	56.432
9 R1	1	9	25187	362	HR	HR	HS	25187HS21	2411.432	3	88.337
9 R1	1	9	25187	362	HR	HR	HS	25187HS21	2411.432	3	124.43
9 R1	1	9	25187	362	HR	HR	HS	25187HS21	2411.432	3	106.084
9 R1	1	9	25187	362	HR	HR	HS	25187HS21	2411.432	3	88.537
9 R1	1	9	25187	362	HR	HR	HS	25187HS31	3086.055	15	173.683
9 R1	1	9	25187	362	HR	HR	HS	25187HS31	3086.055	15	299.509
9 R1	1	9	25187	362	HR	HR	HS	25187HS31	3086.055	15	176.276
9 R1	1	9	25187	362	HR	HR	HS	25187HS31	3086.055	15	148.159
9 R1	1	9	25187	362	HR	HR	HS	25187HS31	3086.055	15	179.466
9 R1	1	9	25187	362	HR	HR	HS	25187HS31	3086.055	15	84.349
9 R1	1	9	25187	362	HR	HR	HS	25187HS31	3086.055	15	115.855
9 R1	1	9	25187	362	HR	HR	HS	25187HS31	3086.055	15	146.963
9 R1	1	9	25187	362	HR	HR	HS	25187HS31	3086.055	15	119.644
9 R1	1	9	25187	362	HR	HR	HS	25187HS31	3086.055	15	182.457
9 R1	1	9	25187	362	HR	HR	HS	25187HS31	3086.055	15	153.543
9 R1	1	9	25187	362	HR	HR	HS	25187HS31	3086.055	15	200.803
9 R1	1	9	25187	362	HR	HR	HS	25187HS31	3086.055	15	88.736
9 R1	1	9	25187	362	HR	HR	HS	25187HS31	3086.055	15	177.671
9 R1	1	9	25187	362	HR	HR	HS	25187HS31	3086.055	15	126.224
9 R1	1	9	25187	362	HR	HR	HS	25187HS31	3086.055	15	129.614
9 R1	1	9	25187	362	HR	HR	HS	25187HS31	3086.055	15	134.4
9 R1	1	9	25187	362	HR	HR	HS	25187HS31	3086.055	15	135.597
9 R1	1	9	25187	362	HR	HR	HS	25187HS31	3086.055	15	215.758
9 R1	1	9	25187	362	HR	HR	HS	25187HS31	3086.055	15	135.198
9 R1	1	9	25187	362	HR	HR	HS	25187HS31	3086.055	15	104.888
9 R1	1	9	25187	362	HR	HR	HS	25187HS31	3086.055	15	39.881
9 R1	1	9	25187	362	HR	HR	HS	25187HS31	3086.055	15	135.397
9 R1	1	9	25187	362	HR	HR	HS	25187HS31	3086.055	15	100.302
9 R1	1	9	25187	362	HR	HR	HS	25187HS31	3086.055	15	93.322
9 R1	1	9	25187	362	HR	HR	HS	25187HS31	3086.055	15	76.772
9 R1	1	9	25187	362	HR	HR	HS	25187HS31	3086.055	15	132.207
9 R1	1	9	25187	362	HR	HR	HS	25187HS31	3086.055	15	168.299
9 R1	1	9	25187	362	HR	HR	HS	25187HS31	3086.055	15	119.445
9 R1	1	9	25187	362	HR	HR	HS	25187HS31	3086.055	15	138.588
9 R1	1	9	25187	362	HR	HR	HS	25187HS41	3690.736	20	149.555
9 R1	1	9	25187	362	HR	HR	HS	25187HS41	3690.736	20	223.734
9 R1	1	9	25187	362	HR	HR	HS	25187HS41	3690.736	20	240.684
9 R1	1	9	25187	362	HR	HR	HS	25187HS41	3690.736	20	116.055
9 R1	1	9	25187	362	HR	HR	HS	25187HS41	3690.736	20	191.231
9 R1	1	9	25187	362	HR	HR	HS	25187HS41	3690.736	20	151.948
9 R1	1	9	25187	362	HR	HR	HS	25187HS41	3690.736	20	191.231
9 R1	1	9	25187	362	HR	HR	HS	25187HS41	3690.736	20	144.769
9 R1	1	9	25187	362	HR	HR	HS	25187HS41	3690.736	20	171.29
9 R1	1	9	25187	362	HR	HR	HS	25187HS41	3690.736	20	181.061
9 R1	1	9	25187	362	HR	HR	HS	25187HS41	3690.736	20	161.519
9 R1	1	9	25187	362	HR	HR	HS	25187HS41	3690.736	20	111.269
9 R1	1	9	25187	362	HR	HR	HS	25187HS41	3690.736	20	214.761
9 R1	1	9	25187	362	HR	HR	HS	25187HS41	3690.736	20	111.867
9 R1	1	9	25187	362	HR	HR	HS	25187HS41	3690.736	20	204.591
9 R1	1	9	25187	362	HR	HR	HS	25187HS41	3690.736	20	171.689
9 R1	1	9	25187	362	HR	HR	HS	25187HS41	3690.736	20	298.911
9 R1	1	9	25187	362	HR	HR	HS	25187HS41	3690.736	20	156.135
9 R1	1	9	25187	362	HR	HR	HS	25187HS41	3690.736	20	175.079
9 R1	1	9	25187	362	HR	HR	HS	25187HS41	3690.736	20	97.111
9 R1	1	9	25187	362	HR	HR	HS	25187HS41	3690.736	20	142.376
9 R1	1	9	25187	362	HR	HR	HS	25187HS41	3690.736	20	116.254
9 R1	1	9	25187	362	HR	HR	HS	25187HS41	3690.736	20	74.578
9 R1	1	9	25187	362	HR	HR	HS	25187HS41	3690.736	20	170.493
9 R1	1	9	25187	362	HR	HR	HS	25187HS41	3690.736	20	164.511
9 R1	1	9	25187	362	HR	HR	HS	25187HS41	3690.736	20	295.321
9 R1	1	9	25187	362	HR	HR	HS	25187HS41	3690.736	20	76.373
9 R1	1	9	25187	362	HR	HR	HS	25187HS41	3690.736	20	148.757
9 R1	1	9	25187	362	HR	HR	HS	25187HS41	3690.736	20	120.442
9 R1	1	9	25187	362	HR	HR	HS	25187HS41	3690.736	20	151.35
9 R1	1	9	25187	362	HR	HR	HS	25187HS51	3569.01	2	208.38
9 R1	1	9	25187	362	HR	HR	HS	25187HS51	3569.01	2	183.853
9 R1	1	9	25187	362	HR	HR	HS	25187HS51	3569.01	2	244.273
9 R1	1	9	25187	362	HR	HR	HS	25187HS51	3569.01	2	171.49
9 R1	1	9	25187	362	HR	HR	HS	25187HS51	3569.01	2	184.651
9 R1	1	9	25187	362	HR	HR	HS	25187HS51	3569.01	2	230.913
9 R1	1	9	25187	362	HR	HR	HS	25187HS51	3569.01	2	195.419
9 R1	1	9	25187	362	HR	HR	HS	25187HS51	3569.01	2	161.32
9 R1	1	9	25187	362	HR	HR	HS	25187HS51	3569.01	2	169.097
9 R1	1	9	25187	362	HR	HR	HS	25187HS51	3569.01	2	226.526
9 R1	1	9	25187	362	HR	HR	HS	25187HS51	3569.01	2	165.109
9 R1	1	9	25187	362	HR	HR	HS	25187HS51	3569.01	2	219.148
9 R1	1	9	25187	362	HR	HR	HS	25187HS51	3569.01	2	123.433
9 R1	1	9	25187	362	HR	HR	HS	25187HS51	3569.01	2	119.644
9 R1	1	9	25187	362	HR	HR	HS	25187HS51	3569.01	2	186.844
9 R1	1	9	25187	362	HR	HR	HS	25187HS51	3569.01	2	165.707
9 R1	1	9	25187	362	HR	HR	HS	25187HS51	3569.01	2	219.746
9 R1	1	9	25187	362	HR	HR	HS	25187HS51	3569.01	2	215.758
9 R1	1	9	25187	362	HR	HR	HS	25187HS51	3569.01	2	179.466
9 R1	1	9	25187	362	HR	HR	HS	25187HS51	3569.01	2	223.535
9 R1	1	9	25187	362	HR	HR	HS	25187HS51	3569.01	2	115.257
9 R1	1	9	25187	362	HR	HR	HS	25187HS51	3569.01	2	165.508
9 R1	1	9	25187	362	HR	HR	HS	25187HS51	3569.01	2	207.582
9 R1	1	9	25187	362	HR	HR	HS	25187HS51	3569.01	2	167.701
9 R1	1	9	25187	362	HR	HR	HS	25187HS51	3569.01	2	75.775
9 R1	1	9	25187	362	HR	HR	HS	25187HS51	3569.01	2	141.379
9 R1	1	9	25187	362	HR	HR	HS	25187HS51	3569.01	2	112.266
9 R1	1	9	25187	362	HR	HR	HS	25187HS51	3569.01	2	158.927
9 R1	1	9	25187	362	HR	HR	HS	25187HS51	3569.01	2	174.88
9 R1	1	9	25187	362	HR	HR	HS	25187HS51	3569.01	2	199.806
9 R1	1	9	25187	362	HR	HR	HS	25187HS61			201.401
9 R1	1	9	25187	362	HR	HR	HS	25187HS61			201.6
9 R1	1	9	25187	362	HR	HR	HS	25187HS61			207.383
9 R1	1	9	25187	362	HR	HR	HS	25187HS61			158.927
9 R1	1	9	25187	362	HR	HR	HS	25187HS61			200.404
9 R1	1	9	25187	362	HR	HR	HS	25187HS61			154.74
9 R1	1	9	25187	362	HR	HR	HS	25187HS61			224.931
9 R1	1	9	25187	362	HR	HR	HS	25187HS61			352.152
9 R1	1	9	25187	362	HR	HR	HS	25187HS61			173.683
9 R1	1	9	25187	362	HR	HR	HS	25187HS61			103.293
9 R1	1	9	25187	362	HR	HR	HS	25187HS61			135.995
9 R1	1	9	25187	362	HR	HR	HS	25187HS61			226.925
9 R1	1	9	25187	362	HR	HR	HS	25187HS61			194.621
9 R1	1	9	25187	362	HR	HR	HS	25187HS61			138.588
9 R1	1	9	25187	362	HR	HR	HS	25187HS61			208.181
9 R1	1	9	25187	362	HR	HR	HS	25187HS61			116.852
9 R1	1	9	25187	362	HR	HR	HS	25187HS61			127.62
9 R1	1	9	25187	362	HR	HR	HS	25187HS61			153.942
9 R1	1	9	25187	362	HR	HR	HS	25187HS61			216.356
9 R1	1	9	25187	362	HR	HR	HS	25187HS61			136.394
9 R1	1	9	25187	362	HR	HR	HS	25187HS61			407.189
9 R1	1	9	25187	362	HR	HR	HS	25187HS61			103.293
9 R1	1	9	25187	362	HR	HR	HS	25187HS61			188.838
9 R1	1	9	25187	362	HR	HR	HS	25187HS61			100.7
9 R1	1	9	25187	362	HR	HR	HS	25187HS61			126.424
9 R1	1	9	25187	362	HR	HR	HS	25187HS61			163.314
9 R1	1	9	25187	362	HR	HR	HS	25187HS61			131.01
9 R1	1	9	25187	362	HR	HR	HS	25187HS61			130.412
9 R1	1	9	25187	362	HR	HR	HS	25187HS61			90.73
9 R1	1	9	25187	362	HR	HR	HS	25187HS61			123.433
9 R1	1	9	25187	362	HR	HR	HY	25187HY11	5197.155	0	661.831
9 R1	1	9	25187	362	HR	HR	HY	25187HY11	5197.155	0	326.628
9 R1	1	9	25187	362	HR	HR	HY	25187HY11	5197.155	0	309.28
9 R1	1	9	25187	362	HR	HR	HY	25187HY11	5197.155	0	605.199
9 R1	1	9	25187	362	HR	HR	HY	25187HY11	5197.155	0	417.558
9 R1	1	9	25187	362	HR	HR	HY	25187HY11	5197.155	0	493.731
9 R1	1	9	25187	362	HR	HR	HY	25187HY11	5197.155	0	704.703
9 R1	1	9	25187	362	HR	HR	HY	25187HY11	5197.155	0	926.444
9 R1	1	9	25187	362	HR	HR	HY	25187HY11	5197.155	0	826.541
9 R1	1	9	25187	362	HR	HR	HY	25187HY11	5197.155	0	903.711
9 R1	1	9	25187	362	HR	HR	HY	25187HY11	5197.155	0	248.86
9 R1	1	9	25187	362	HR	HR	HY	25187HY11	5197.155	0	645.081
9 R1	1	9	25187	362	HR	HR	HY	25187HY11	5197.155	0	375.882
9 R1	1	9	25187	362	HR	HR	HY	25187HY11	5197.155	0	372.093
9 R1	1	9	25187	362	HR	HR	HY	25187HY11	5197.155	0	445.674
9 R1	1	9	25187	362	HR	HR	HY	25187HY11	5197.155	0	553.553
9 R1	1	9	25187	362	HR	HR	HY	25187HY11	5197.155	0	633.914
9 R1	1	9	25187	362	HR	HR	HY	25187HY11	5197.155	0	336
9 R1	1	9	25187	362	HR	HR	HY	25187HY11	5197.155	0	282.161
9 R1	1	9	25187	362	HR	HR	HY	25187HY11	5197.155	0	207.184
9 R1	1	9	25187	362	HR	HR	HY	25187HY11	5197.155	0	174.68
9 R1	1	9	25187	362	HR	HR	HY	25187HY11	5197.155	0	365.911
9 R1	1	9	25187	362	HR	HR	HY	25187HY11	5197.155	0	246.866
9 R1	1	9	25187	362	HR	HR	HY	25187HY11	5197.155	0	570.104
9 R1	1	9	25187	362	HR	HR	HY	25187HY11	5197.155	0	430.32
9 R1	1	9	25187	362	HR	HR	HY	25187HY11	5197.155	0	414.168
9 R1	1	9	25187	362	HR	HR	HY	25187HY11	5197.155	0	434.507
9 R1	1	9	25187	362	HR	HR	HY	25187HY11	5197.155	0	453.85
9 R1	1	9	25187	362	HR	HR	HY	25187HY11	5197.155	0	367.706
9 R1	1	9	25187	362	HR	HR	HY	25187HY11	5197.155	0	407.189
9 R1	1	9	25187	362	HR	HR	HY	25187HY21	5148.701	0	512.076
9 R1	1	9	25187	362	HR	HR	HY	25187HY21	5148.701	0	403.998
9 R1	1	9	25187	362	HR	HR	HY	25187HY21	5148.701	0	358.533
9 R1	1	9	25187	362	HR	HR	HY	25187HY21	5148.701	0	408.385
9 R1	1	9	25187	362	HR	HR	HY	25187HY21	5148.701	0	542.586
9 R1	1	9	25187	362	HR	HR	HY	25187HY21	5148.701	0	535.208
9 R1	1	9	25187	362	HR	HR	HY	25187HY21	5148.701	0	604.003
9 R1	1	9	25187	362	HR	HR	HY	25187HY21	5148.701	0	430.519
9 R1	1	9	25187	362	HR	HR	HY	25187HY21	5148.701	0	432.513
9 R1	1	9	25187	362	HR	HR	HY	25187HY21	5148.701	0	570.104
9 R1	1	9	25187	362	HR	HR	HY	25187HY21	5148.701	0	463.222
9 R1	1	9	25187	362	HR	HR	HY	25187HY21	5148.701	0	368.902
9 R1	1	9	25187	362	HR	HR	HY	25187HY21	5148.701	0	373.888
9 R1	1	9	25187	362	HR	HR	HY	25187HY21	5148.701	0	716.668
9 R1	1	9	25187	362	HR	HR	HY	25187HY21	5148.701	0	405.593
9 R1	1	9	25187	362	HR	HR	HY	25187HY21	5148.701	0	427.129
9 R1	1	9	25187	362	HR	HR	HY	25187HY21	5148.701	0	393.828
9 R1	1	9	25187	362	HR	HR	HY	25187HY21	5148.701	0	395.025
9 R1	1	9	25187	362	HR	HR	HY	25187HY21	5148.701	0	570.503
9 R1	1	9	25187	362	HR	HR	HY	25187HY21	5148.701	0	507.49
9 R1	1	9	25187	362	HR	HR	HY	25187HY21	5148.701	0	513.074
9 R1	1	9	25187	362	HR	HR	HY	25187HY21	5148.701	0	358.733
9 R1	1	9	25187	362	HR	HR	HY	25187HY21	5148.701	0	573.494
9 R1	1	9	25187	362	HR	HR	HY	25187HY21	5148.701	0	480.57
9 R1	1	9	25187	362	HR	HR	HY	25187HY21	5148.701	0	671.203
9 R1	1	9	25187	362	HR	HR	HY	25187HY21	5148.701	0	468.207
9 R1	1	9	25187	362	HR	HR	HY	25187HY21	5148.701	0	521.249
9 R1	1	9	25187	362	HR	HR	HY	25187HY21	5148.701	0	424.338
9 R1	1	9	25187	362	HR	HR	HY	25187HY21	5148.701	0	388.644
9 R1	1	9	25187	362	HR	HR	HY	25187HY21	5148.701	0	570.901
9 R1	1	9	25187	362	HR	HR	HY	25187HY31	5399.489	0	449.463
9 R1	1	9	25187	362	HR	HR	HY	25187HY31	5399.489	0	533.014
9 R1	1	9	25187	362	HR	HR	HY	25187HY31	5399.489	0	424.338
9 R1	1	9	25187	362	HR	HR	HY	25187HY31	5399.489	0	480.171
9 R1	1	9	25187	362	HR	HR	HY	25187HY31	5399.489	0	485.157
9 R1	1	9	25187	362	HR	HR	HY	25187HY31	5399.489	0	382.263
9 R1	1	9	25187	362	HR	HR	HY	25187HY31	5399.489	0	462.624
9 R1	1	9	25187	362	HR	HR	HY	25187HY31	5399.489	0	741.793
9 R1	1	9	25187	362	HR	HR	HY	25187HY31	5399.489	0	450.061
9 R1	1	9	25187	362	HR	HR	HY	25187HY31	5399.489	0	633.715
9 R1	1	9	25187	362	HR	HR	HY	25187HY31	5399.489	0	452.853
9 R1	1	9	25187	362	HR	HR	HY	25187HY31	5399.489	0	629.527
9 R1	1	9	25187	362	HR	HR	HY	25187HY31	5399.489	0	807.398
9 R1	1	9	25187	362	HR	HR	HY	25187HY31	5399.489	0	686.757
9 R1	1	9	25187	362	HR	HR	HY	25187HY31	5399.489	0	487.549
9 R1	1	9	25187	362	HR	HR	HY	25187HY31	5399.489	0	436.501
9 R1	1	9	25187	362	HR	HR	HY	25187HY31	5399.489	0	661.632
9 R1	1	9	25187	362	HR	HR	HY	25187HY31	5399.489	0	346.768
9 R1	1	9	25187	362	HR	HR	HY	25187HY31	5399.489	0	495.326
9 R1	1	9	25187	362	HR	HR	HY	25187HY31	5399.489	0	434.308
9 R1	1	9	25187	362	HR	HR	HY	25187HY31	5399.489	0	264.613
9 R1	1	9	25187	362	HR	HR	HY	25187HY31	5399.489	0	297.714
9 R1	1	9	25187	362	HR	HR	HY	25187HY31	5399.489	0	484.359
9 R1	1	9	25187	362	HR	HR	HY	25187HY31	5399.489	0	385.054
9 R1	1	9	25187	362	HR	HR	HY	25187HY31	5399.489	0	509.684
9 R1	1	9	25187	362	HR	HR	HY	25187HY31	5399.489	0	585.259
9 R1	1	9	25187	362	HR	HR	HY	25187HY31	5399.489	0	841.895
9 R1	1	9	25187	362	HR	HR	HY	25187HY31	5399.489	0	606.595
9 R1	1	9	25187	362	HR	HR	HY	25187HY31	5399.489	0	479.374
9 R1	1	9	25187	362	HR	HR	HY	25187HY31	5399.489	0	434.507
9 R1	1	9	25187	362	HR	HR	HY	25187HY41	6242.555	1	439.492
9 R1	1	9	25187	362	HR	HR	HY	25187HY41	6242.555	1	748.772
9 R1	1	9	25187	362	HR	HR	HY	25187HY41	6242.555	1	745.582
9 R1	1	9	25187	362	HR	HR	HY	25187HY41	6242.555	1	604.801
9 R1	1	9	25187	362	HR	HR	HY	25187HY41	6242.555	1	582.866
9 R1	1	9	25187	362	HR	HR	HY	25187HY41	6242.555	1	463.222
9 R1	1	9	25187	362	HR	HR	HY	25187HY41	6242.555	1	556.943
9 R1	1	9	25187	362	HR	HR	HY	25187HY41	6242.555	1	515.267
9 R1	1	9	25187	362	HR	HR	HY	25187HY41	6242.555	1	499.115
9 R1	1	9	25187	362	HR	HR	HY	25187HY41	6242.555	1	292.928
9 R1	1	9	25187	362	HR	HR	HY	25187HY41	6242.555	1	444.278
9 R1	1	9	25187	362	HR	HR	HY	25187HY41	6242.555	1	710.287
9 R1	1	9	25187	362	HR	HR	HY	25187HY41	6242.555	1	516.663
9 R1	1	9	25187	362	HR	HR	HY	25187HY41	6242.555	1	582.866
9 R1	1	9	25187	362	HR	HR	HY	25187HY41	6242.555	1	545.776
9 R1	1	9	25187	362	HR	HR	HY	25187HY41	6242.555	1	540.791
9 R1	1	9	25187	362	HR	HR	HY	25187HY41	6242.555	1	457.04
9 R1	1	9	25187	362	HR	HR	HY	25187HY41	6242.555	1	391.037
9 R1	1	9	25187	362	HR	HR	HY	25187HY41	6242.555	1	518.457
9 R1	1	9	25187	362	HR	HR	HY	25187HY41	6242.555	1	773.898
9 R1	1	9	25187	362	HR	HR	HY	25187HY41	6242.555	1	608.191
9 R1	1	9	25187	362	HR	HR	HY	25187HY41	6242.555	1	639.497
9 R1	1	9	25187	362	HR	HR	HY	25187HY41	6242.555	1	645.679
9 R1	1	9	25187	362	HR	HR	HY	25187HY41	6242.555	1	575.488
9 R1	1	9	25187	362	HR	HR	HY	25187HY41	6242.555	1	505.895
9 R1	1	9	25187	362	HR	HR	HY	25187HY41	6242.555	1	469.403
9 R1	1	9	25187	362	HR	HR	HY	25187HY41	6242.555	1	333.209
9 R1	1	9	25187	362	HR	HR	HY	25187HY41	6242.555	1	683.167
9 R1	1	9	25187	362	HR	HR	HY	25187HY41	6242.555	1	566.714
9 R1	1	9	25187	362	HR	HR	HY	25187HY41	6242.555	1	681.971
9 R1	1	9	25187	362	HR	HR	HY	25187HY51	5690.176	1	789.651
9 R1	1	9	25187	362	HR	HR	HY	25187HY51	5690.176	1	647.673
9 R1	1	9	25187	362	HR	HR	HY	25187HY51	5690.176	1	518.258
9 R1	1	9	25187	362	HR	HR	HY	25187HY51	5690.176	1	649.268
9 R1	1	9	25187	362	HR	HR	HY	25187HY51	5690.176	1	475.784
9 R1	1	9	25187	362	HR	HR	HY	25187HY51	5690.176	1	625.539
9 R1	1	9	25187	362	HR	HR	HY	25187HY51	5690.176	1	484.16
9 R1	1	9	25187	362	HR	HR	HY	25187HY51	5690.176	1	561.529
9 R1	1	9	25187	362	HR	HR	HY	25187HY51	5690.176	1	277.375
9 R1	1	9	25187	362	HR	HR	HY	25187HY51	5690.176	1	468.207
9 R1	1	9	25187	362	HR	HR	HY	25187HY51	5690.176	1	717.465
9 R1	1	9	25187	362	HR	HR	HY	25187HY51	5690.176	1	568.11
9 R1	1	9	25187	362	HR	HR	HY	25187HY51	5690.176	1	809.791
9 R1	1	9	25187	362	HR	HR	HY	25187HY51	5690.176	1	676.188
9 R1	1	9	25187	362	HR	HR	HY	25187HY51	5690.176	1	468.805
9 R1	1	9	25187	362	HR	HR	HY	25187HY51	5690.176	1	527.431
9 R1	1	9	25187	362	HR	HR	HY	25187HY51	5690.176	1	178.668
9 R1	1	9	25187	362	HR	HR	HY	25187HY51	5690.176	1	498.317
9 R1	1	9	25187	362	HR	HR	HY	25187HY51	5690.176	1	427.129
9 R1	1	9	25187	362	HR	HR	HY	25187HY51	5690.176	1	391.037
9 R1	1	9	25187	362	HR	HR	HY	25187HY51	5690.176	1	318.652
9 R1	1	9	25187	362	HR	HR	HY	25187HY51	5690.176	1	628.331
9 R1	1	9	25187	362	HR	HR	HY	25187HY51	5690.176	1	296.518
9 R1	1	9	25187	362	HR	HR	HY	25187HY51	5690.176	1	862.235
9 R1	1	9	25187	362	HR	HR	HY	25187HY51	5690.176	1	527.231
9 R1	1	9	25187	362	HR	HR	HY	25187HY51	5690.176	1	806.999
9 R1	1	9	25187	362	HR	HR	HY	25187HY51	5690.176	1	609.188
9 R1	1	9	25187	362	HR	HR	HY	25187HY51	5690.176	1	399.212
9 R1	1	9	25187	362	HR	HR	HY	25187HY51	5690.176	1	547.97
9 R1	1	9	25187	362	HR	HR	HY	25187HY51	5690.176	1	566.515
9 R1	1	9	25187	362	HR	HR	HY	25187HY61	5263.116	1	374.885
9 R1	1	9	25187	362	HR	HR	HY	25187HY61	5263.116	1	469.005
9 R1	1	9	25187	362	HR	HR	HY	25187HY61	5263.116	1	532.815
9 R1	1	9	25187	362	HR	HR	HY	25187HY61	5263.116	1	391.635
9 R1	1	9	25187	362	HR	HR	HY	25187HY61	5263.116	1	464.618
9 R1	1	9	25187	362	HR	HR	HY	25187HY61	5263.116	1	576.684
9 R1	1	9	25187	362	HR	HR	HY	25187HY61	5263.116	1	516.065
9 R1	1	9	25187	362	HR	HR	HY	25187HY61	5263.116	1	556.943
9 R1	1	9	25187	362	HR	HR	HY	25187HY61	5263.116	1	360.727
9 R1	1	9	25187	362	HR	HR	HY	25187HY61	5263.116	1	691.144
9 R1	1	9	25187	362	HR	HR	HY	25187HY61	5263.116	1	258.83
9 R1	1	9	25187	362	HR	HR	HY	25187HY61	5263.116	1	429.522
9 R1	1	9	25187	362	HR	HR	HY	25187HY61	5263.116	1	225.13
9 R1	1	9	25187	362	HR	HR	HY	25187HY61	5263.116	1	385.254
9 R1	1	9	25187	362	HR	HR	HY	25187HY61	5263.116	1	313.268
9 R1	1	9	25187	362	HR	HR	HY	25187HY61	5263.116	1	344.575
9 R1	1	9	25187	362	HR	HR	HY	25187HY61	5263.116	1	367.108
9 R1	1	9	25187	362	HR	HR	HY	25187HY61	5263.116	1	311.673
9 R1	1	9	25187	362	HR	HR	HY	25187HY61	5263.116	1	363.917
9 R1	1	9	25187	362	HR	HR	HY	25187HY61	5263.116	1	447.07
9 R1	1	9	25187	362	HR	HR	HY	25187HY61	5263.116	1	496.323
9 R1	1	9	25187	362	HR	HR	HY	25187HY61	5263.116	1	391.037
9 R1	1	9	25187	362	HR	HR	HY	25187HY61	5263.116	1	492.136
9 R1	1	9	25187	362	HR	HR	HY	25187HY61	5263.116	1	576.086
9 R1	1	9	25187	362	HR	HR	HY	25187HY61	5263.116	1	484.558
9 R1	1	9	25187	362	HR	HR	HY	25187HY61	5263.116	1	520.651
9 R1	1	9	25187	362	HR	HR	HY	25187HY61	5263.116	1	568.509
9 R1	1	9	25187	362	HR	HR	HY	25187HY61	5263.116	1	500.71
9 R1	1	9	25187	362	HR	HR	HY	25187HY61	5263.116	1	138.588
9 R1	1	9	25187	362	HR	HR	HY	25187HY61	5263.116	1	343.578
2 R2	2	2	25187	362	HR	HR	HS	25187HS12	4640.871	0	255.639
2 R2	2	2	25187	362	HR	HR	HS	25187HS12	4640.871	0	178.27
2 R2	2	2	25187	362	HR	HR	HS	25187HS12	4640.871	0	445.475
2 R2	2	2	25187	362	HR	HR	HS	25187HS12	4640.871	0	208.181
2 R2	2	2	25187	362	HR	HR	HS	25187HS12	4640.871	0	227.324
2 R2	2	2	25187	362	HR	HR	HS	25187HS12	4640.871	0	206.386
2 R2	2	2	25187	362	HR	HR	HS	25187HS12	4640.871	0	192.627
2 R2	2	2	25187	362	HR	HR	HS	25187HS12	4640.871	0	199.407
2 R2	2	2	25187	362	HR	HR	HS	25187HS12	4640.871	0	280.765
2 R2	2	2	25187	362	HR	HR	HS	25187HS12	4640.871	0	237.892
2 R2	2	2	25187	362	HR	HR	HS	25187HS12	4640.871	0	304.494
2 R2	2	2	25187	362	HR	HR	HS	25187HS12	4640.871	0	205.19
2 R2	2	2	25187	362	HR	HR	HS	25187HS12	4640.871	0	225.13
2 R2	2	2	25187	362	HR	HR	HS	25187HS12	4640.871	0	311.473
2 R2	2	2	25187	362	HR	HR	HS	25187HS12	4640.871	0	272.19
2 R2	2	2	25187	362	HR	HR	HS	25187HS12	4640.871	0	200.404
2 R2	2	2	25187	362	HR	HR	HS	25187HS12	4640.871	0	234.702
2 R2	2	2	25187	362	HR	HR	HS	25187HS12	4640.871	0	342.98
2 R2	2	2	25187	362	HR	HR	HS	25187HS12	4640.871	0	735.213
2 R2	2	2	25187	362	HR	HR	HS	25187HS12	4640.871	0	139.784
2 R2	2	2	25187	362	HR	HR	HS	25187HS12	4640.871	0	261.622
2 R2	2	2	25187	362	HR	HR	HS	25187HS12	4640.871	0	208.779
2 R2	2	2	25187	362	HR	HR	HS	25187HS12	4640.871	0	168.499
2 R2	2	2	25187	362	HR	HR	HS	25187HS12	4640.871	0	196.216
2 R2	2	2	25187	362	HR	HR	HS	25187HS12	4640.871	0	206.984
2 R2	2	2	25187	362	HR	HR	HS	25187HS12	4640.871	0	210.175
2 R2	2	2	25187	362	HR	HR	HS	25187HS12	4640.871	0	244.074
2 R2	2	2	25187	362	HR	HR	HS	25187HS12	4640.871	0	191.829
2 R2	2	2	25187	362	HR	HR	HS	25187HS12	4640.871	0	208.579
2 R2	2	2	25187	362	HR	HR	HS	25187HS12	4640.871	0	250.455
2 R2	2	2	25187	362	HR	HR	HS	25187HS22	4408.507	2	406.192
2 R2	2	2	25187	362	HR	HR	HS	25187HS22	4408.507	2	252.848
2 R2	2	2	25187	362	HR	HR	HS	25187HS22	4408.507	2	312.869
2 R2	2	2	25187	362	HR	HR	HS	25187HS22	4408.507	2	253.645
2 R2	2	2	25187	362	HR	HR	HS	25187HS22	4408.507	2	183.255
2 R2	2	2	25187	362	HR	HR	HS	25187HS22	4408.507	2	114.061
2 R2	2	2	25187	362	HR	HR	HS	25187HS22	4408.507	2	129.016
2 R2	2	2	25187	362	HR	HR	HS	25187HS22	4408.507	2	140.582
2 R2	2	2	25187	362	HR	HR	HS	25187HS22	4408.507	2	182.457
2 R2	2	2	25187	362	HR	HR	HS	25187HS22	4408.507	2	259.029
2 R2	2	2	25187	362	HR	HR	HS	25187HS22	4408.507	2	457.439
2 R2	2	2	25187	362	HR	HR	HS	25187HS22	4408.507	2	190.633
2 R2	2	2	25187	362	HR	HR	HS	25187HS22	4408.507	2	172.686
2 R2	2	2	25187	362	HR	HR	HS	25187HS22	4408.507	2	592.039
2 R2	2	2	25187	362	HR	HR	HS	25187HS22	4408.507	2	307.884
2 R2	2	2	25187	362	HR	HR	HS	25187HS22	4408.507	2	372.891
2 R2	2	2	25187	362	HR	HR	HS	25187HS22	4408.507	2	115.257
2 R2	2	2	25187	362	HR	HR	HS	25187HS22	4408.507	2	90.531
2 R2	2	2	25187	362	HR	HR	HS	25187HS22	4408.507	2	214.163
2 R2	2	2	25187	362	HR	HR	HS	25187HS22	4408.507	2	125.227
2 R2	2	2	25187	362	HR	HR	HS	25187HS22	4408.507	2	225.13
2 R2	2	2	25187	362	HR	HR	HS	25187HS22	4408.507	2	536.404
2 R2	2	2	25187	362	HR	HR	HS	25187HS22	4408.507	2	289.14
2 R2	2	2	25187	362	HR	HR	HS	25187HS22	4408.507	2	275.181
2 R2	2	2	25187	362	HR	HR	HS	25187HS22	4408.507	2	266.607
2 R2	2	2	25187	362	HR	HR	HS	25187HS22	4408.507	2	399.013
2 R2	2	2	25187	362	HR	HR	HS	25187HS22	4408.507	2	193.624
2 R2	2	2	25187	362	HR	HR	HS	25187HS22	4408.507	2	226.925
2 R2	2	2	25187	362	HR	HR	HS	25187HS22	4408.507	2	435.704
2 R2	2	2	25187	362	HR	HR	HS	25187HS22	4408.507	2	160.522
2 R2	2	2	25187	362	HR	HR	HS	25187HS32	4277.614	0	214.562
2 R2	2	2	25187	362	HR	HR	HS	25187HS32	4277.614	0	256.437
2 R2	2	2	25187	362	HR	HR	HS	25187HS32	4277.614	0	217.353
2 R2	2	2	25187	362	HR	HR	HS	25187HS32	4277.614	0	194.222
2 R2	2	2	25187	362	HR	HR	HS	25187HS32	4277.614	0	219.547
2 R2	2	2	25187	362	HR	HR	HS	25187HS32	4277.614	0	181.66
2 R2	2	2	25187	362	HR	HR	HS	25187HS32	4277.614	0	352.751
2 R2	2	2	25187	362	HR	HR	HS	25187HS32	4277.614	0	181.261
2 R2	2	2	25187	362	HR	HR	HS	25187HS32	4277.614	0	167.701
2 R2	2	2	25187	362	HR	HR	HS	25187HS32	4277.614	0	197.213
2 R2	2	2	25187	362	HR	HR	HS	25187HS32	4277.614	0	207.184
2 R2	2	2	25187	362	HR	HR	HS	25187HS32	4277.614	0	215.559
2 R2	2	2	25187	362	HR	HR	HS	25187HS32	4277.614	0	142.775
2 R2	2	2	25187	362	HR	HR	HS	25187HS32	4277.614	0	296.917
2 R2	2	2	25187	362	HR	HR	HS	25187HS32	4277.614	0	224.333
2 R2	2	2	25187	362	HR	HR	HS	25187HS32	4277.614	0	264.214
2 R2	2	2	25187	362	HR	HR	HS	25187HS32	4277.614	0	252.05
2 R2	2	2	25187	362	HR	HR	HS	25187HS32	4277.614	0	188.439
2 R2	2	2	25187	362	HR	HR	HS	25187HS32	4277.614	0	181.66
2 R2	2	2	25187	362	HR	HR	HS	25187HS32	4277.614	0	169.296
2 R2	2	2	25187	362	HR	HR	HS	25187HS32	4277.614	0	196.216
2 R2	2	2	25187	362	HR	HR	HS	25187HS32	4277.614	0	169.895
2 R2	2	2	25187	362	HR	HR	HS	25187HS32	4277.614	0	232.109
2 R2	2	2	25187	362	HR	HR	HS	25187HS32	4277.614	0	242.279
2 R2	2	2	25187	362	HR	HR	HS	25187HS32	4277.614	0	210.374
2 R2	2	2	25187	362	HR	HR	HS	25187HS32	4277.614	0	225.13
2 R2	2	2	25187	362	HR	HR	HS	25187HS32	4277.614	0	172.487
2 R2	2	2	25187	362	HR	HR	HS	25187HS32	4277.614	0	375.283
2 R2	2	2	25187	362	HR	HR	HS	25187HS32	4277.614	0	135.995
2 R2	2	2	25187	362	HR	HR	HS	25187HS32	4277.614	0	119.245
2 R2	2	2	25187	362	HR	HR	HS	25187HS42	4390.925	0	395.224
2 R2	2	2	25187	362	HR	HR	HS	25187HS42	4390.925	0	243.476
2 R2	2	2	25187	362	HR	HR	HS	25187HS42	4390.925	0	235.699
2 R2	2	2	25187	362	HR	HR	HS	25187HS42	4390.925	0	206.785
2 R2	2	2	25187	362	HR	HR	HS	25187HS42	4390.925	0	183.853
2 R2	2	2	25187	362	HR	HR	HS	25187HS42	4390.925	0	154.939
2 R2	2	2	25187	362	HR	HR	HS	25187HS42	4390.925	0	158.13
2 R2	2	2	25187	362	HR	HR	HS	25187HS42	4390.925	0	153.344
2 R2	2	2	25187	362	HR	HR	HS	25187HS42	4390.925	0	155.537
2 R2	2	2	25187	362	HR	HR	HS	25187HS42	4390.925	0	167.103
2 R2	2	2	25187	362	HR	HR	HS	25187HS42	4390.925	0	213.764
2 R2	2	2	25187	362	HR	HR	HS	25187HS42	4390.925	0	131.808
2 R2	2	2	25187	362	HR	HR	HS	25187HS42	4390.925	0	223.934
2 R2	2	2	25187	362	HR	HR	HS	25187HS42	4390.925	0	217.154
2 R2	2	2	25187	362	HR	HR	HS	25187HS42	4390.925	0	126.424
2 R2	2	2	25187	362	HR	HR	HS	25187HS42	4390.925	0	140.981
2 R2	2	2	25187	362	HR	HR	HS	25187HS42	4390.925	0	235.898
2 R2	2	2	25187	362	HR	HR	HS	25187HS42	4390.925	0	177.671
2 R2	2	2	25187	362	HR	HR	HS	25187HS42	4390.925	0	150.751
2 R2	2	2	25187	362	HR	HR	HS	25187HS42	4390.925	0	106.284
2 R2	2	2	25187	362	HR	HR	HS	25187HS42	4390.925	0	127.421
2 R2	2	2	25187	362	HR	HR	HS	25187HS42	4390.925	0	124.031
2 R2	2	2	25187	362	HR	HR	HS	25187HS42	4390.925	0	204.392
2 R2	2	2	25187	362	HR	HR	HS	25187HS42	4390.925	0	158.728
2 R2	2	2	25187	362	HR	HR	HS	25187HS42	4390.925	0	235.3
2 R2	2	2	25187	362	HR	HR	HS	25187HS42	4390.925	0	131.808
2 R2	2	2	25187	362	HR	HR	HS	25187HS42	4390.925	0	185.049
2 R2	2	2	25187	362	HR	HR	HS	25187HS42	4390.925	0	162.317
2 R2	2	2	25187	362	HR	HR	HS	25187HS42	4390.925	0	224.931
2 R2	2	2	25187	362	HR	HR	HS	25187HS42	4390.925	0	144.171
2 R2	2	2	25187	362	HR	HR	HS	25187HS52	4575.844	1	194.82
2 R2	2	2	25187	362	HR	HR	HS	25187HS52	4575.844	1	294.524
2 R2	2	2	25187	362	HR	HR	HS	25187HS52	4575.844	1	295.122
2 R2	2	2	25187	362	HR	HR	HS	25187HS52	4575.844	1	171.091
2 R2	2	2	25187	362	HR	HR	HS	25187HS52	4575.844	1	172.287
2 R2	2	2	25187	362	HR	HR	HS	25187HS52	4575.844	1	237.693
2 R2	2	2	25187	362	HR	HR	HS	25187HS52	4575.844	1	211.571
2 R2	2	2	25187	362	HR	HR	HS	25187HS52	4575.844	1	209.377
2 R2	2	2	25187	362	HR	HR	HS	25187HS52	4575.844	1	170.493
[truncated: 5,872 more rows]
