# Supplementary material for: Multiscale analysis reveals that diet-dependent midgut plasticity emerges from alterations in both stem cell niche coupling and enterocyte size
Source: eLife. 2021 Sep 23;10:e64125. doi: 10.7554/eLife.64125 (PMC8528489; doi:10.7554/eLife.64125)
Supplement: Figure 6—source data 2. [file elife-64125-fig6-data2.csv]

Cross	Female.Line	CrossNumber	Phase	Repeat	PhaseRep	Diet	Diet1	Day	Group	C.G	Male.Line.ID	Male.Line	Gene	Total.PH3
Esg X 4 P1 R1	Esg	4	1	4	1_4	HStoHY D7	HStoHY	7	G	HY	Cs	Cs	Control	1
Esg X 4 P1 R1	Esg	4	1	4	1_4	HStoHY D7	HStoHY	7	G	HY	Cs	Cs	Control	5
Esg X 4 P1 R1	Esg	4	1	4	1_4	HStoHY D7	HStoHY	7	G	HY	Cs	Cs	Control	3
Esg X 4 P1 R1	Esg	4	1	4	1_4	HStoHY D7	HStoHY	7	G	HY	Cs	Cs	Control	2
Esg X 4 P1 R1	Esg	4	1	4	1_4	HStoHY D7	HStoHY	7	G	HY	Cs	Cs	Control	8
Esg X 4 P1 R1	Esg	4	1	4	1_4	HStoHY D7	HStoHY	7	G	HY	Cs	Cs	Control	6
Esg X 4 P1 R1	Esg	4	1	4	1_4	HStoHY D7	HStoHY	7	G	HY	Cs	Cs	Control	1
Esg X 4 P1 R1	Esg	4	1	4	1_4	HStoHY D7	HStoHY	7	G	HY	Cs	Cs	Control	3
Esg X 4 P1 R1	Esg	4	1	4	1_4	HStoHY D7	HStoHY	7	G	HY	Cs	Cs	Control	7
Esg X 6 P1 R1	Esg	6	1	4	1_4	HStoHY D7	HStoHY	7	G	HY	60012	Egfr-IR	Egfr	1
Esg X 6 P1 R1	Esg	6	1	4	1_4	HStoHY D7	HStoHY	7	G	HY	60012	Egfr-IR	Egfr	0
Esg X 6 P1 R1	Esg	6	1	4	1_4	HStoHY D7	HStoHY	7	G	HY	60012	Egfr-IR	Egfr	2
Esg X 6 P1 R1	Esg	6	1	4	1_4	HStoHY D7	HStoHY	7	G	HY	60012	Egfr-IR	Egfr	1
Esg X 6 P1 R1	Esg	6	1	4	1_4	HStoHY D7	HStoHY	7	G	HY	60012	Egfr-IR	Egfr	0
Esg X 6 P1 R1	Esg	6	1	4	1_4	HStoHY D7	HStoHY	7	G	HY	60012	Egfr-IR	Egfr	0
Esg X 6 P1 R1	Esg	6	1	4	1_4	HStoHY D7	HStoHY	7	G	HY	60012	Egfr-IR	Egfr	0
Esg X 6 P1 R1	Esg	6	1	4	1_4	HStoHY D7	HStoHY	7	G	HY	60012	Egfr-IR	Egfr	0
Esg X 6 P1 R1	Esg	6	1	4	1_4	HStoHY D7	HStoHY	7	G	HY	60012	Egfr-IR	Egfr	0
Esg X 6 P1 R1	Esg	6	1	4	1_4	HStoHY D7	HStoHY	7	G	HY	60012	Egfr-IR	Egfr	0
Esg X 1 P1 R2	Esg	1	1	5	1_5	HStoHY D7	HStoHY	7	G	HY	Cs	Cs	Control	5
Esg X 1 P1 R2	Esg	1	1	5	1_5	HStoHY D7	HStoHY	7	G	HY	Cs	Cs	Control	17
Esg X 1 P1 R2	Esg	1	1	5	1_5	HStoHY D7	HStoHY	7	G	HY	Cs	Cs	Control	13
Esg X 1 P1 R2	Esg	1	1	5	1_5	HStoHY D7	HStoHY	7	G	HY	Cs	Cs	Control	19
Esg X 1 P1 R2	Esg	1	1	5	1_5	HStoHY D7	HStoHY	7	G	HY	Cs	Cs	Control	4
Esg X 1 P1 R2	Esg	1	1	5	1_5	HStoHY D7	HStoHY	7	G	HY	Cs	Cs	Control	4
Esg X 1 P1 R2	Esg	1	1	5	1_5	HStoHY D7	HStoHY	7	G	HY	Cs	Cs	Control	15
Esg X 11 P1 R2	Esg	11	1	5	1_5	HStoHY D7	HStoHY	7	G	HY	60012	Egfr-IR	Egfr	0
Esg X 11 P1 R2	Esg	11	1	5	1_5	HStoHY D7	HStoHY	7	G	HY	60012	Egfr-IR	Egfr	0
Esg X 11 P1 R2	Esg	11	1	5	1_5	HStoHY D7	HStoHY	7	G	HY	60012	Egfr-IR	Egfr	1
Esg X 11 P1 R2	Esg	11	1	5	1_5	HStoHY D7	HStoHY	7	G	HY	60012	Egfr-IR	Egfr	2
Esg X 11 P1 R2	Esg	11	1	5	1_5	HStoHY D7	HStoHY	7	G	HY	60012	Egfr-IR	Egfr	0
Esg X 11 P1 R2	Esg	11	1	5	1_5	HStoHY D7	HStoHY	7	G	HY	60012	Egfr-IR	Egfr	1
Esg X 11 P1 R2	Esg	11	1	5	1_5	HStoHY D7	HStoHY	7	G	HY	60012	Egfr-IR	Egfr	0
Esg X 11 P1 R2	Esg	11	1	5	1_5	HStoHY D7	HStoHY	7	G	HY	60012	Egfr-IR	Egfr	0
