# Supplementary material for: Multiscale analysis reveals that diet-dependent midgut plasticity emerges from alterations in both stem cell niche coupling and enterocyte size
Source: eLife. 2021 Sep 23;10:e64125. doi: 10.7554/eLife.64125 (PMC8528489; doi:10.7554/eLife.64125)
Supplement: Figure 6—source data 3. [file elife-64125-fig6-data3.csv]

Cross	Female.Line	Phase	Repeat	PhaseRep	Diet	Diet1	Day	Group	C.G	Male.Line.ID	Male.Line	Gene	Total.L
Esg X 25 P5-2 R2	Esg	05_02	2	05_02_2	HS D0	HS	0	G	HS	60012	Egfr-IR	Egfr	4150.967
Esg X 25 P5-2 R2	Esg	05_02	2	05_02_2	HS D0	HS	0	G	HS	60012	Egfr-IR	Egfr	3777.162
Esg X 25 P5-2 R2	Esg	05_02	2	05_02_2	HS D0	HS	0	G	HS	60012	Egfr-IR	Egfr	4589.251
Esg X 25 P5-2 R2	Esg	05_02	2	05_02_2	HS D0	HS	0	G	HS	60012	Egfr-IR	Egfr	5114.799
Esg X 25 P5-2 R2	Esg	05_02	2	05_02_2	HS D0	HS	0	G	HS	60012	Egfr-IR	Egfr	4444.107
Esg X 25 P5-2 R2	Esg	05_02	2	05_02_2	HS D0	HS	0	G	HS	60012	Egfr-IR	Egfr	3851.614
Esg X 25 P5-2 R2	Esg	05_02	2	05_02_2	HS D0	HS	0	G	HS	60012	Egfr-IR	Egfr	4009.46
Esg X 25 P5-2 R2	Esg	05_02	2	05_02_2	HS D0	HS	0	G	HS	60012	Egfr-IR	Egfr	3489.039
Esg X 1 P5-2 R2	Esg	05_02	2	05_02_2	HS D0	HS	0	G	HS	Cs	Control	Control	4447.794
Esg X 1 P5-2 R2	Esg	05_02	2	05_02_2	HS D0	HS	0	G	HS	Cs	Control	Control	4447.794
Esg X 1 P5-2 R2	Esg	05_02	2	05_02_2	HS D0	HS	0	G	HS	Cs	Control	Control	4704.611
Esg X 1 P5-2 R2	Esg	05_02	2	05_02_2	HS D0	HS	0	G	HS	Cs	Control	Control	4742.746
Esg X 1 P5-2 R2	Esg	05_02	2	05_02_2	HS D0	HS	0	G	HS	Cs	Control	Control	4782.785
Esg X 1 P5-2 R2	Esg	05_02	2	05_02_2	HS D0	HS	0	G	HS	Cs	Control	Control	5261.334
Esg X 25 P5-2 R2	Esg	05_02	2	05_02_2	HStoHY D7	HStoHY	7	G	HY	60012	Egfr-IR	Egfr	6094.963
Esg X 25 P5-2 R2	Esg	05_02	2	05_02_2	HStoHY D7	HStoHY	7	G	HY	60012	Egfr-IR	Egfr	6503.868
Esg X 25 P5-2 R2	Esg	05_02	2	05_02_2	HStoHY D7	HStoHY	7	G	HY	60012	Egfr-IR	Egfr	6110.238
Esg X 25 P5-2 R2	Esg	05_02	2	05_02_2	HStoHY D7	HStoHY	7	G	HY	60012	Egfr-IR	Egfr	7011.68
Esg X 25 P5-2 R2	Esg	05_02	2	05_02_2	HStoHY D7	HStoHY	7	G	HY	60012	Egfr-IR	Egfr	5638.292
Esg X 25 P5-2 R2	Esg	05_02	2	05_02_2	HStoHY D7	HStoHY	7	G	HY	60012	Egfr-IR	Egfr	5592.66
Esg X 1 P5-2 R2	Esg	05_02	2	05_02_2	HStoHY D7	HStoHY	7	G	HY	Cs	Control	Control	5990.048
Esg X 1 P5-2 R2	Esg	05_02	2	05_02_2	HStoHY D7	HStoHY	7	G	HY	Cs	Control	Control	6276.984
Esg X 1 P5-2 R2	Esg	05_02	2	05_02_2	HStoHY D7	HStoHY	7	G	HY	Cs	Control	Control	6302.156
Esg X 1 P5-2 R2	Esg	05_02	2	05_02_2	HStoHY D7	HStoHY	7	G	HY	Cs	Control	Control	6465.136
Esg X 1 P5-2 R2	Esg	05_02	2	05_02_2	HStoHY D7	HStoHY	7	G	HY	Cs	Control	Control	6478.195
Esg X 1 P5-2 R2	Esg	05_02	2	05_02_2	HStoHY D7	HStoHY	7	G	HY	Cs	Control	Control	6573.797
Esg X 1 P5-2 R2	Esg	05_02	2	05_02_2	HStoHY D7	HStoHY	7	G	HY	Cs	Control	Control	7043.199
Esg X 1 P5-2 R2	Esg	05_02	2	05_02_2	HStoHY D7	HStoHY	7	G	HY	Cs	Control	Control	7323.783
Esg X 1 P5-2 R2	Esg	05_02	2	05_02_2	HStoHY D7	HStoHY	7	G	HY	Cs	Control	Control	7375.512
Esg X 1 P5-2 R2	Esg	05_02	2	05_02_2	HStoHY D7	HStoHY	7	G	HY	Cs	Control	Control	7443.903
Esg X 26 P5-3 R3	Esg	05_03	3	05_03_3	HS D0	HS	0	G	HS	60012	Egfr-IR	Egfr	3573.924
Esg X 26 P5-3 R3	Esg	05_03	3	05_03_3	HS D0	HS	0	G	HS	60012	Egfr-IR	Egfr	4404.597
Esg X 26 P5-3 R3	Esg	05_03	3	05_03_3	HS D0	HS	0	G	HS	60012	Egfr-IR	Egfr	4332.046
Esg X 26 P5-3 R3	Esg	05_03	3	05_03_3	HS D0	HS	0	G	HS	60012	Egfr-IR	Egfr	4770.826
Esg X 26 P5-3 R3	Esg	05_03	3	05_03_3	HS D0	HS	0	G	HS	60012	Egfr-IR	Egfr	4590.579
Esg X 26 P5-3 R3	Esg	05_03	3	05_03_3	HS D0	HS	0	G	HS	60012	Egfr-IR	Egfr	4955.206
Esg X 26 P5-3 R3	Esg	05_03	3	05_03_3	HS D0	HS	0	G	HS	60012	Egfr-IR	Egfr	4912.894
Esg X 26 P5-3 R3	Esg	05_03	3	05_03_3	HS D0	HS	0	G	HS	60012	Egfr-IR	Egfr	4300.153
Esg X 5 P5-3 R3	Esg	05_03	3	05_03_3	HS D0	HS	0	G	HS	Cs	Control	Control	4088.934
Esg X 5 P5-3 R3	Esg	05_03	3	05_03_3	HS D0	HS	0	G	HS	Cs	Control	Control	4429.153
Esg X 5 P5-3 R3	Esg	05_03	3	05_03_3	HS D0	HS	0	G	HS	Cs	Control	Control	4654.554
Esg X 5 P5-3 R3	Esg	05_03	3	05_03_3	HS D0	HS	0	G	HS	Cs	Control	Control	4695.595
Esg X 5 P5-3 R3	Esg	05_03	3	05_03_3	HS D0	HS	0	G	HS	Cs	Control	Control	5171.47
Esg X 5 P5-3 R3	Esg	05_03	3	05_03_3	HS D0	HS	0	G	HS	Cs	Control	Control	5521.166
Esg X 26 P5-3 R3	Esg	05_03	3	05_03_3	HStoHY D7	HStoHY	7	G	HY	60012	Egfr-IR	Egfr	6100.2
Esg X 26 P5-3 R3	Esg	05_03	3	05_03_3	HStoHY D7	HStoHY	7	G	HY	60012	Egfr-IR	Egfr	5415.883
Esg X 26 P5-3 R3	Esg	05_03	3	05_03_3	HStoHY D7	HStoHY	7	G	HY	60012	Egfr-IR	Egfr	5568.357
Esg X 26 P5-3 R3	Esg	05_03	3	05_03_3	HStoHY D7	HStoHY	7	G	HY	60012	Egfr-IR	Egfr	6256.18
Esg X 26 P5-3 R3	Esg	05_03	3	05_03_3	HStoHY D7	HStoHY	7	G	HY	60012	Egfr-IR	Egfr	6675.798
Esg X 26 P5-3 R3	Esg	05_03	3	05_03_3	HStoHY D7	HStoHY	7	G	HY	60012	Egfr-IR	Egfr	6210.37
Esg X 26 P5-3 R3	Esg	05_03	3	05_03_3	HStoHY D7	HStoHY	7	G	HY	60012	Egfr-IR	Egfr	5528.471
Esg X 26 P5-3 R3	Esg	05_03	3	05_03_3	HStoHY D7	HStoHY	7	G	HY	60012	Egfr-IR	Egfr	7071.867
Esg X 5 P5-3 R3	Esg	05_03	3	05_03_3	HStoHY D7	HStoHY	7	G	HY	Cs	Control	Control	5441.911
Esg X 5 P5-3 R3	Esg	05_03	3	05_03_3	HStoHY D7	HStoHY	7	G	HY	Cs	Control	Control	5576.262
Esg X 5 P5-3 R3	Esg	05_03	3	05_03_3	HStoHY D7	HStoHY	7	G	HY	Cs	Control	Control	5594.183
Esg X 5 P5-3 R3	Esg	05_03	3	05_03_3	HStoHY D7	HStoHY	7	G	HY	Cs	Control	Control	5816.783
Esg X 5 P5-3 R3	Esg	05_03	3	05_03_3	HStoHY D7	HStoHY	7	G	HY	Cs	Control	Control	6154.412
Esg X 5 P5-3 R3	Esg	05_03	3	05_03_3	HStoHY D7	HStoHY	7	G	HY	Cs	Control	Control	6161.852
Esg X 5 P5-3 R3	Esg	05_03	3	05_03_3	HStoHY D7	HStoHY	7	G	HY	Cs	Control	Control	6591.623
Esg X 5 P5-3 R3	Esg	05_03	3	05_03_3	HStoHY D7	HStoHY	7	G	HY	Cs	Control	Control	6652.768
Esg X 6 P3 R1	Esg	3	1	3_1	HS D0	HS	0	G	HS	60012	Egfr-IR	Egfr	4748.975
Esg X 6 P3 R1	Esg	3	1	3_1	HS D0	HS	0	G	HS	60012	Egfr-IR	Egfr	5506.259
Esg X 6 P3 R1	Esg	3	1	3_1	HS D0	HS	0	G	HS	60012	Egfr-IR	Egfr	5435.773
Esg X 6 P3 R1	Esg	3	1	3_1	HS D0	HS	0	G	HS	60012	Egfr-IR	Egfr	5053.634
Esg X 6 P3 R1	Esg	3	1	3_1	HS D0	HS	0	G	HS	60012	Egfr-IR	Egfr	5084.723
Esg X 6 P3 R1	Esg	3	1	3_1	HS D0	HS	0	G	HS	60012	Egfr-IR	Egfr	5280.532
Esg X 6 P3 R1	Esg	3	1	3_1	HS D0	HS	0	G	HS	60012	Egfr-IR	Egfr	4671.731
Esg X 6 P3 R1	Esg	3	1	3_1	HS D0	HS	0	G	HS	60012	Egfr-IR	Egfr	4815.972
Esg X 6 P3 R1	Esg	3	1	3_1	HS D0	HS	0	G	HS	60012	Egfr-IR	Egfr	4064.461
Esg X 1 P3 R1	Esg	3	1	3_1	HS D0	HS	0	G	HS	Cs	Control	Control	5185.406
Esg X 1 P3 R1	Esg	3	1	3_1	HS D0	HS	0	G	HS	Cs	Control	Control	5261.405
Esg X 1 P3 R1	Esg	3	1	3_1	HS D0	HS	0	G	HS	Cs	Control	Control	5278.266
Esg X 1 P3 R1	Esg	3	1	3_1	HS D0	HS	0	G	HS	Cs	Control	Control	5351.479
Esg X 1 P3 R1	Esg	3	1	3_1	HS D0	HS	0	G	HS	Cs	Control	Control	5625.025
Esg X 6 P3 R1	Esg	3	1	3_1	HStoHY D7	HStoHY	7	G	HY	60012	Egfr-IR	Egfr	6895.81
Esg X 6 P3 R1	Esg	3	1	3_1	HStoHY D7	HStoHY	7	G	HY	60012	Egfr-IR	Egfr	6275.526
Esg X 6 P3 R1	Esg	3	1	3_1	HStoHY D7	HStoHY	7	G	HY	60012	Egfr-IR	Egfr	7144.906
Esg X 6 P3 R1	Esg	3	1	3_1	HStoHY D7	HStoHY	7	G	HY	60012	Egfr-IR	Egfr	8282.082
Esg X 6 P3 R1	Esg	3	1	3_1	HStoHY D7	HStoHY	7	G	HY	60012	Egfr-IR	Egfr	6059.1
Esg X 6 P3 R1	Esg	3	1	3_1	HStoHY D7	HStoHY	7	G	HY	60012	Egfr-IR	Egfr	5967.105
Esg X 6 P3 R1	Esg	3	1	3_1	HStoHY D7	HStoHY	7	G	HY	60012	Egfr-IR	Egfr	6921.092
Esg X 6 P3 R1	Esg	3	1	3_1	HStoHY D7	HStoHY	7	G	HY	60012	Egfr-IR	Egfr	6360.888
Esg X 6 P3 R1	Esg	3	1	3_1	HStoHY D7	HStoHY	7	G	HY	60012	Egfr-IR	Egfr	6940.775
Esg X 6 P3 R1	Esg	3	1	3_1	HStoHY D7	HStoHY	7	G	HY	60012	Egfr-IR	Egfr	6822.719
Esg X 1 P3 R1	Esg	3	1	3_1	HStoHY D7	HStoHY	7	G	HY	Cs	Control	Control	6811.508
Esg X 1 P3 R1	Esg	3	1	3_1	HStoHY D7	HStoHY	7	G	HY	Cs	Control	Control	7092.256
Esg X 1 P3 R1	Esg	3	1	3_1	HStoHY D7	HStoHY	7	G	HY	Cs	Control	Control	7216.259
Esg X 1 P3 R1	Esg	3	1	3_1	HStoHY D7	HStoHY	7	G	HY	Cs	Control	Control	7336.671
Esg X 1 P3 R1	Esg	3	1	3_1	HStoHY D7	HStoHY	7	G	HY	Cs	Control	Control	7463.75
Esg X 1 P3 R1	Esg	3	1	3_1	HStoHY D7	HStoHY	7	G	HY	Cs	Control	Control	7623.376
Esg X 1 P3 R1	Esg	3	1	3_1	HStoHY D7	HStoHY	7	G	HY	Cs	Control	Control	7871.966
Esg X 1 P3 R1	Esg	3	1	3_1	HStoHY D7	HStoHY	7	G	HY	Cs	Control	Control	8255.951
Esg X 1 P1 R2	Esg	1	5	1_5	HS D0	HS	0	G	HS	Cs	Control	Control	3864.979
Esg X 1 P1 R2	Esg	1	5	1_5	HS D0	HS	0	G	HS	Cs	Control	Control	3593.805
Esg X 1 P1 R2	Esg	1	5	1_5	HS D0	HS	0	G	HS	Cs	Control	Control	2803.911
Esg X 1 P1 R2	Esg	1	5	1_5	HS D0	HS	0	G	HS	Cs	Control	Control	3815.862
Esg X 1 P1 R2	Esg	1	5	1_5	HS D0	HS	0	G	HS	Cs	Control	Control	3780.504
Esg X 1 P1 R2	Esg	1	5	1_5	HS D0	HS	0	G	HS	Cs	Control	Control	3611.847
Esg X 1 P1 R2	Esg	1	5	1_5	HS D0	HS	0	G	HS	Cs	Control	Control	3618.784
Esg X 11 P1 R2	Esg	1	5	1_5	HS D0	HS	0	G	HS	60012	Egfr-IR	Egfr	3785.383
Esg X 11 P1 R2	Esg	1	5	1_5	HS D0	HS	0	G	HS	60012	Egfr-IR	Egfr	4799.61
Esg X 11 P1 R2	Esg	1	5	1_5	HS D0	HS	0	G	HS	60012	Egfr-IR	Egfr	3629.77
Esg X 11 P1 R2	Esg	1	5	1_5	HS D0	HS	0	G	HS	60012	Egfr-IR	Egfr	3343.229
Esg X 11 P1 R2	Esg	1	5	1_5	HS D0	HS	0	G	HS	60012	Egfr-IR	Egfr	4818.966
Esg X 11 P1 R2	Esg	1	5	1_5	HS D0	HS	0	G	HS	60012	Egfr-IR	Egfr	3993.49
Esg X 11 P1 R2	Esg	1	5	1_5	HS D0	HS	0	G	HS	60012	Egfr-IR	Egfr	3537.016
Esg X 1 P1 R2	Esg	1	5	1_5	HStoHY D7	HStoHY	7	G	HY	Cs	Control	Control	6206.585
Esg X 1 P1 R2	Esg	1	5	1_5	HStoHY D7	HStoHY	7	G	HY	Cs	Control	Control	7242.458
Esg X 1 P1 R2	Esg	1	5	1_5	HStoHY D7	HStoHY	7	G	HY	Cs	Control	Control	6281.592
Esg X 1 P1 R2	Esg	1	5	1_5	HStoHY D7	HStoHY	7	G	HY	Cs	Control	Control	6249.116
Esg X 1 P1 R2	Esg	1	5	1_5	HStoHY D7	HStoHY	7	G	HY	Cs	Control	Control	6626.793
Esg X 1 P1 R2	Esg	1	5	1_5	HStoHY D7	HStoHY	7	G	HY	Cs	Control	Control	5976.165
Esg X 1 P1 R2	Esg	1	5	1_5	HStoHY D7	HStoHY	7	G	HY	Cs	Control	Control	5443.402
Esg X 1 P1 R2	Esg	1	5	1_5	HStoHY D7	HStoHY	7	G	HY	Cs	Control	Control	5380.641
Esg X 11 P1 R2	Esg	1	5	1_5	HStoHY D7	HStoHY	7	G	HY	60012	Egfr-IR	Egfr	6232.769
Esg X 11 P1 R2	Esg	1	5	1_5	HStoHY D7	HStoHY	7	G	HY	60012	Egfr-IR	Egfr	6271.67
Esg X 11 P1 R2	Esg	1	5	1_5	HStoHY D7	HStoHY	7	G	HY	60012	Egfr-IR	Egfr	6042.93
Esg X 11 P1 R2	Esg	1	5	1_5	HStoHY D7	HStoHY	7	G	HY	60012	Egfr-IR	Egfr	5113.879
Esg X 11 P1 R2	Esg	1	5	1_5	HStoHY D7	HStoHY	7	G	HY	60012	Egfr-IR	Egfr	6635.876
Esg X 11 P1 R2	Esg	1	5	1_5	HStoHY D7	HStoHY	7	G	HY	60012	Egfr-IR	Egfr	5834.953
Esg X 11 P1 R2	Esg	1	5	1_5	HStoHY D7	HStoHY	7	G	HY	60012	Egfr-IR	Egfr	5301.841
Esg X 11 P1 R2	Esg	1	5	1_5	HStoHY D7	HStoHY	7	G	HY	60012	Egfr-IR	Egfr	6597.164
