# Supplementary material for: Multiscale analysis reveals that diet-dependent midgut plasticity emerges from alterations in both stem cell niche coupling and enterocyte size
Source: eLife. 2021 Sep 23;10:e64125. doi: 10.7554/eLife.64125 (PMC8528489; doi:10.7554/eLife.64125)
Supplement: Figure 6—source data 4. [file elife-64125-fig6-data4.csv]

Cross	Female.Line	Repeat	Diet	Dietold	Diet1	Day	Group	C.G	Male.Line.ID	Male.Line	Gene	GutNumber	Total.PH3
Esg X 3 P1 R1	Esg	1	HStoHY D7	HStoHY	HStoHY	7	G	HY	wdah	wdah	Control	1	0
Esg X 3 P1 R1	Esg	1	HStoHY D7	HStoHY	HStoHY	7	G	HY	wdah	wdah	Control	2	1
Esg X 3 P1 R1	Esg	1	HStoHY D7	HStoHY	HStoHY	7	G	HY	wdah	wdah	Control	3	3
Esg X 3 P1 R1	Esg	1	HStoHY D7	HStoHY	HStoHY	7	G	HY	wdah	wdah	Control	4	6
Esg X 3 P1 R1	Esg	1	HStoHY D7	HStoHY	HStoHY	7	G	HY	wdah	wdah	Control	5	3
Esg X 3 P1 R1	Esg	1	HStoHY D7	HStoHY	HStoHY	7	G	HY	wdah	wdah	Control	6	9
Esg X 12 P1 R1	Esg	1	HStoHY D7	HStoHY	HStoHY	7	G	HY	InR-DN	InR-DN	wdah	1	0
Esg X 12 P1 R1	Esg	1	HStoHY D7	HStoHY	HStoHY	7	G	HY	InR-DN	InR-DN	wdah	2	1
Esg X 12 P1 R1	Esg	1	HStoHY D7	HStoHY	HStoHY	7	G	HY	InR-DN	InR-DN	wdah	3	2
Esg X 12 P1 R1	Esg	1	HStoHY D7	HStoHY	HStoHY	7	G	HY	InR-DN	InR-DN	wdah	4	0
Esg X 12 P1 R1	Esg	1	HStoHY D7	HStoHY	HStoHY	7	G	HY	InR-DN	InR-DN	wdah	5	0
Esg X 12 P1 R1	Esg	1	HStoHY D7	HStoHY	HStoHY	7	G	HY	InR-DN	InR-DN	wdah	6	0
Esg X 12 P1 R1	Esg	1	HStoHY D7	HStoHY	HStoHY	7	G	HY	InR-DN	InR-DN	wdah	7	0
Esg X 12 P1 R1	Esg	1	HStoHY D7	HStoHY	HStoHY	7	G	HY	InR-DN	InR-DN	wdah	8	1
Esg X 12 P1 R1	Esg	1	HStoHY D7	HStoHY	HStoHY	7	G	HY	InR-DN	InR-DN	wdah	9	2
Esg X 12 P1 R1	Esg	1	HStoHY D7	HStoHY	HStoHY	7	G	HY	InR-DN	InR-DN	wdah	10	1
Esg X 9 P2 R2	Esg	2	HStoHY D7	HStoHY	HStoHY	7	G	HY	wdah	wdah	Control	1	10
Esg X 9 P2 R2	Esg	2	HStoHY D7	HStoHY	HStoHY	7	G	HY	wdah	wdah	Control	2	2
Esg X 9 P2 R2	Esg	2	HStoHY D7	HStoHY	HStoHY	7	G	HY	wdah	wdah	Control	3	6
Esg X 9 P2 R2	Esg	2	HStoHY D7	HStoHY	HStoHY	7	G	HY	wdah	wdah	Control	4	14
Esg X 9 P2 R2	Esg	2	HStoHY D7	HStoHY	HStoHY	7	G	HY	wdah	wdah	Control	5	3
Esg X 9 P2 R2	Esg	2	HStoHY D7	HStoHY	HStoHY	7	G	HY	wdah	wdah	Control	6	11
Esg X 9 P2 R2	Esg	2	HStoHY D7	HStoHY	HStoHY	7	G	HY	wdah	wdah	Control	7	21
Esg X 10 P2 R2	Esg	2	HStoHY D7	HStoHY	HStoHY	7	G	HY	InR-DN	InR-DN	Control	1	0
Esg X 10 P2 R2	Esg	2	HStoHY D7	HStoHY	HStoHY	7	G	HY	InR-DN	InR-DN	Control	2	0
Esg X 10 P2 R2	Esg	2	HStoHY D7	HStoHY	HStoHY	7	G	HY	InR-DN	InR-DN	Control	3	1
Esg X 10 P2 R2	Esg	2	HStoHY D7	HStoHY	HStoHY	7	G	HY	InR-DN	InR-DN	Control	4	3
Esg X 10 P2 R2	Esg	2	HStoHY D7	HStoHY	HStoHY	7	G	HY	InR-DN	InR-DN	Control	5	0
Esg X 10 P2 R2	Esg	2	HStoHY D7	HStoHY	HStoHY	7	G	HY	InR-DN	InR-DN	Control	6	2
Esg X 10 P2 R2	Esg	2	HStoHY D7	HStoHY	HStoHY	7	G	HY	InR-DN	InR-DN	Control	7	1
