# Supplementary material for: Multiscale analysis reveals that diet-dependent midgut plasticity emerges from alterations in both stem cell niche coupling and enterocyte size
Source: eLife. 2021 Sep 23;10:e64125. doi: 10.7554/eLife.64125 (PMC8528489; doi:10.7554/eLife.64125)
Supplement: Figure 6—source data 5. [file elife-64125-fig6-data5.csv]

Cross	Female.Line	CrossNumber	Phase	Repeat	PhaseRep	Diet	Diet1	Day	Group	C.G	Male.Line.ID	Male.Line	Gene	Total.L
Esg X 5 PT2 R1	Esg	5	T2	1	T2_1	HY D0	HY	0	S	HY	InR-DN	InR-DN	Inr	4832.429
Esg X 5 PT2 R1	Esg	5	T2	1	T2_1	HY D0	HY	0	S	HY	InR-DN	InR-DN	Inr	4451.665
Esg X 5 PT2 R1	Esg	5	T2	1	T2_1	HY D0	HY	0	S	HY	InR-DN	InR-DN	Inr	4518.435
Esg X 5 PT2 R1	Esg	5	T2	1	T2_1	HY D0	HY	0	S	HY	InR-DN	InR-DN	Inr	5211.591
Esg X 5 PT2 R1	Esg	5	T2	1	T2_1	HY D0	HY	0	S	HY	InR-DN	InR-DN	Inr	5220.252
Esg X 5 PT2 R1	Esg	5	T2	1	T2_1	HY D0	HY	0	S	HY	InR-DN	InR-DN	Inr	4369.233
Esg X 5 PT2 R1	Esg	5	T2	1	T2_1	HY D0	HY	0	S	HY	InR-DN	InR-DN	Inr	5446.913
Esg X 5 PT2 R1	Esg	5	T2	1	T2_1	HY D0	HY	0	S	HY	InR-DN	InR-DN	Inr	5058.761
Esg X 5 PT2 R1	Esg	5	T2	1	T2_1	HY D0	HY	0	S	HY	InR-DN	InR-DN	Inr	6261.907
Esg X 5 PT2 R1	Esg	5	T2	1	T2_1	HS D0	HS	0	G	HS	InR-DN	InR-DN	Inr	4698.026
Esg X 5 PT2 R1	Esg	5	T2	1	T2_1	HS D0	HS	0	G	HS	InR-DN	InR-DN	Inr	4135.265
Esg X 5 PT2 R1	Esg	5	T2	1	T2_1	HS D0	HS	0	G	HS	InR-DN	InR-DN	Inr	4145.316
Esg X 5 PT2 R1	Esg	5	T2	1	T2_1	HS D0	HS	0	G	HS	InR-DN	InR-DN	Inr	4064.712
Esg X 5 PT2 R1	Esg	5	T2	1	T2_1	HS D0	HS	0	G	HS	InR-DN	InR-DN	Inr	4689.691
Esg X 5 PT2 R1	Esg	5	T2	1	T2_1	HS D0	HS	0	G	HS	InR-DN	InR-DN	Inr	5104.902
Esg X 5 PT2 R1	Esg	5	T2	1	T2_1	HS D0	HS	0	G	HS	InR-DN	InR-DN	Inr	4637.854
Esg X 5 PT2 R1	Esg	5	T2	1	T2_1	HS D0	HS	0	G	HS	InR-DN	InR-DN	Inr	3663.875
Esg X 5 PT2 R1	Esg	5	T2	1	T2_1	HS D0	HS	0	G	HS	InR-DN	InR-DN	Inr	3777.755
Esg X 5 PT2 R1	Esg	5	T2	1	T2_1	HYtoHS D7	HYtoHS	7	S	HS	InR-DN	InR-DN	Inr	4209.654
Esg X 5 PT2 R1	Esg	5	T2	1	T2_1	HYtoHS D7	HYtoHS	7	S	HS	InR-DN	InR-DN	Inr	4577.634
Esg X 5 PT2 R1	Esg	5	T2	1	T2_1	HYtoHS D7	HYtoHS	7	S	HS	InR-DN	InR-DN	Inr	4138.275
Esg X 5 PT2 R1	Esg	5	T2	1	T2_1	HYtoHS D7	HYtoHS	7	S	HS	InR-DN	InR-DN	Inr	4085.45
Esg X 5 PT2 R1	Esg	5	T2	1	T2_1	HYtoHS D7	HYtoHS	7	S	HS	InR-DN	InR-DN	Inr	5192.677
Esg X 5 PT2 R1	Esg	5	T2	1	T2_1	HYtoHS D7	HYtoHS	7	S	HS	InR-DN	InR-DN	Inr	4417.918
Esg X 5 PT2 R1	Esg	5	T2	1	T2_1	HYtoHS D7	HYtoHS	7	S	HS	InR-DN	InR-DN	Inr	4992.785
Esg X 5 PT2 R1	Esg	5	T2	1	T2_1	HYtoHS D7	HYtoHS	7	S	HS	InR-DN	InR-DN	Inr	5044.018
Esg X 5 PT2 R1	Esg	5	T2	1	T2_1	HStoHY D7	HStoHY	7	G	HY	InR-DN	InR-DN	Inr	4117.042
Esg X 5 PT2 R1	Esg	5	T2	1	T2_1	HStoHY D7	HStoHY	7	G	HY	InR-DN	InR-DN	Inr	3955.713
Esg X 5 PT2 R1	Esg	5	T2	1	T2_1	HStoHY D7	HStoHY	7	G	HY	InR-DN	InR-DN	Inr	4233.306
Esg X 5 PT2 R1	Esg	5	T2	1	T2_1	HStoHY D7	HStoHY	7	G	HY	InR-DN	InR-DN	Inr	3810.852
Esg X 5 PT2 R1	Esg	5	T2	1	T2_1	HStoHY D7	HStoHY	7	G	HY	InR-DN	InR-DN	Inr	4863.064
Esg X 5 PT2 R1	Esg	5	T2	1	T2_1	HStoHY D7	HStoHY	7	G	HY	InR-DN	InR-DN	Inr	4619.971
Esg X 5 PT2 R1	Esg	5	T2	1	T2_1	HStoHY D7	HStoHY	7	G	HY	InR-DN	InR-DN	Inr	4000.916
Esg X 5 PT2 R1	Esg	5	T2	1	T2_1	HStoHY D7	HStoHY	7	G	HY	InR-DN	InR-DN	Inr	4478.328
Esg X 5 PT2 R1	Esg	5	T2	1	T2_1	HStoHY D7	HStoHY	7	G	HY	InR-DN	InR-DN	Inr	4599.364
Esg X 5 PT2 R1	Esg	5	T2	1	T2_1	HStoHY D7	HStoHY	7	G	HY	InR-DN	InR-DN	Inr	4594.179
Esg X 5 PT2 R1	Esg	5	T2	1	T2_1	HStoHY D7	HStoHY	7	G	HY	InR-DN	InR-DN	Inr	3970.258
Esg X 3 Pattp40 R2	Esg	3	attp40	2	attp40_2	HS D0	HS	0	G	HS	InR-DN	InR-DN	Inr	3611.72
Esg X 3 Pattp40 R2	Esg	3	attp40	2	attp40_2	HS D0	HS	0	G	HS	InR-DN	InR-DN	Inr	3433.798
Esg X 3 Pattp40 R2	Esg	3	attp40	2	attp40_2	HS D0	HS	0	G	HS	InR-DN	InR-DN	Inr	3816.81
Esg X 3 Pattp40 R2	Esg	3	attp40	2	attp40_2	HS D0	HS	0	G	HS	InR-DN	InR-DN	Inr	3553.247
Esg X 3 Pattp40 R2	Esg	3	attp40	2	attp40_2	HS D0	HS	0	G	HS	InR-DN	InR-DN	Inr	4092.007
Esg X 3 Pattp40 R2	Esg	3	attp40	2	attp40_2	HS D0	HS	0	G	HS	InR-DN	InR-DN	Inr	3266.454
Esg X 3 Pattp40 R2	Esg	3	attp40	2	attp40_2	HS D0	HS	0	G	HS	InR-DN	InR-DN	Inr	3353.637
Esg X 3 Pattp40 R2	Esg	3	attp40	2	attp40_2	HYtoHS D7	HYtoHS	7	S	HS	InR-DN	InR-DN	Inr	4622.502
Esg X 3 Pattp40 R2	Esg	3	attp40	2	attp40_2	HYtoHS D7	HYtoHS	7	S	HS	InR-DN	InR-DN	Inr	3676.301
Esg X 3 Pattp40 R2	Esg	3	attp40	2	attp40_2	HYtoHS D7	HYtoHS	7	S	HS	InR-DN	InR-DN	Inr	4516.157
Esg X 3 Pattp40 R2	Esg	3	attp40	2	attp40_2	HYtoHS D7	HYtoHS	7	S	HS	InR-DN	InR-DN	Inr	5520.849
Esg X 3 Pattp40 R2	Esg	3	attp40	2	attp40_2	HYtoHS D7	HYtoHS	7	S	HS	InR-DN	InR-DN	Inr	4365.202
Esg X 3 Pattp40 R2	Esg	3	attp40	2	attp40_2	HYtoHS D7	HYtoHS	7	S	HS	InR-DN	InR-DN	Inr	4713.127
Esg X 3 Pattp40 R2	Esg	3	attp40	2	attp40_2	HYtoHS D7	HYtoHS	7	S	HS	InR-DN	InR-DN	Inr	4791.952
Esg X 3 Pattp40 R2	Esg	3	attp40	2	attp40_2	HYtoHS D7	HYtoHS	7	S	HS	InR-DN	InR-DN	Inr	4983.746
Esg X 3 Pattp40 R2	Esg	3	attp40	2	attp40_2	HYtoHS D7	HYtoHS	7	S	HS	InR-DN	InR-DN	Inr	5102.545
Esg X 3 Pattp40 R2	Esg	3	attp40	2	attp40_2	HYtoHS D7	HYtoHS	7	S	HS	InR-DN	InR-DN	Inr	5053.309
Esg X 3 Pattp40 R2	Esg	3	attp40	2	attp40_2	HY D0	HY	0	S	HY	InR-DN	InR-DN	Inr	5442.426
Esg X 3 Pattp40 R2	Esg	3	attp40	2	attp40_2	HY D0	HY	0	S	HY	InR-DN	InR-DN	Inr	6415.02
Esg X 3 Pattp40 R2	Esg	3	attp40	2	attp40_2	HY D0	HY	0	S	HY	InR-DN	InR-DN	Inr	5829.47
Esg X 3 Pattp40 R2	Esg	3	attp40	2	attp40_2	HY D0	HY	0	S	HY	InR-DN	InR-DN	Inr	6816.744
Esg X 3 Pattp40 R2	Esg	3	attp40	2	attp40_2	HY D0	HY	0	S	HY	InR-DN	InR-DN	Inr	6828.35
Esg X 3 Pattp40 R2	Esg	3	attp40	2	attp40_2	HY D0	HY	0	S	HY	InR-DN	InR-DN	Inr	6626.882
Esg X 3 Pattp40 R2	Esg	3	attp40	2	attp40_2	HY D0	HY	0	S	HY	InR-DN	InR-DN	Inr	7670.101
Esg X 3 Pattp40 R2	Esg	3	attp40	2	attp40_2	HY D0	HY	0	S	HY	InR-DN	InR-DN	Inr	6409.8
Esg X 3 Pattp40 R2	Esg	3	attp40	2	attp40_2	HY D0	HY	0	S	HY	InR-DN	InR-DN	Inr	6749.049
Esg X 3 Pattp40 R2	Esg	3	attp40	2	attp40_2	HStoHY D7	HStoHY	7	G	HY	InR-DN	InR-DN	Inr	5442.427
Esg X 3 Pattp40 R2	Esg	3	attp40	2	attp40_2	HStoHY D7	HStoHY	7	G	HY	InR-DN	InR-DN	Inr	6833.58
Esg X 3 Pattp40 R2	Esg	3	attp40	2	attp40_2	HStoHY D7	HStoHY	7	G	HY	InR-DN	InR-DN	Inr	5013.027
Esg X 3 Pattp40 R2	Esg	3	attp40	2	attp40_2	HStoHY D7	HStoHY	7	G	HY	InR-DN	InR-DN	Inr	5242.285
Esg X 3 Pattp40 R2	Esg	3	attp40	2	attp40_2	HStoHY D7	HStoHY	7	G	HY	InR-DN	InR-DN	Inr	6573.806
Esg X 3 Pattp40 R2	Esg	3	attp40	2	attp40_2	HStoHY D7	HStoHY	7	G	HY	InR-DN	InR-DN	Inr	5119.493
Esg X 3 Pattp40 R2	Esg	3	attp40	2	attp40_2	HStoHY D7	HStoHY	7	G	HY	InR-DN	InR-DN	Inr	5002.06
Esg X 3 Pattp40 R2	Esg	3	attp40	2	attp40_2	HStoHY D7	HStoHY	7	G	HY	InR-DN	InR-DN	Inr	5051.236
Esg X 3 Pattp40 R2	Esg	3	attp40	2	attp40_2	HStoHY D7	HStoHY	7	G	HY	InR-DN	InR-DN	Inr	4500.04
Esg X 3 Pattp40 R2	Esg	3	attp40	2	attp40_2	HStoHY D7	HStoHY	7	G	HY	InR-DN	InR-DN	Inr	5775.643
	Esg		i	3	i_3	HS D0	HS	0	G	HS	InR-DN	InR-DN	Inr	6203
	Esg		i	3	i_3	HS D0	HS	0	G	HS	InR-DN	InR-DN	Inr	4342
	Esg		i	3	i_3	HS D0	HS	0	G	HS	InR-DN	InR-DN	Inr	6089
	Esg		i	3	i_3	HS D0	HS	0	G	HS	InR-DN	InR-DN	Inr	4598
	Esg		i	3	i_3	HS D0	HS	0	G	HS	InR-DN	InR-DN	Inr	3991
	Esg		i	3	i_3	HS D0	HS	0	G	HS	InR-DN	InR-DN	Inr	5609
	Esg		i	3	i_3	HS D0	HS	0	G	HS	InR-DN	InR-DN	Inr	5627
	Esg		i	3	i_3	HStoHY D7	HStoHY	7	G	HY	InR-DN	InR-DN	Inr	6001
	Esg		i	3	i_3	HStoHY D7	HStoHY	7	G	HY	InR-DN	InR-DN	Inr	6526
	Esg		i	3	i_3	HStoHY D7	HStoHY	7	G	HY	InR-DN	InR-DN	Inr	5967
	Esg		i	3	i_3	HStoHY D7	HStoHY	7	G	HY	InR-DN	InR-DN	Inr	5509
	Esg		i	3	i_3	HStoHY D7	HStoHY	7	G	HY	InR-DN	InR-DN	Inr	7160
	Esg		i	3	i_3	HStoHY D7	HStoHY	7	G	HY	InR-DN	InR-DN	Inr	5355
	Esg		i	3	i_3	HStoHY D7	HStoHY	7	G	HY	InR-DN	InR-DN	Inr	6345
	Esg		i	4	i_4	HS D0	HS	0	G	HS	InR-DN	InR-DN	Inr	5250
	Esg		i	4	i_4	HS D0	HS	0	G	HS	InR-DN	InR-DN	Inr	4842
	Esg		i	4	i_4	HS D0	HS	0	G	HS	InR-DN	InR-DN	Inr	4500
	Esg		i	4	i_4	HS D0	HS	0	G	HS	InR-DN	InR-DN	Inr	5059
	Esg		i	4	i_4	HS D0	HS	0	G	HS	InR-DN	InR-DN	Inr	5347
	Esg		i	4	i_4	HS D0	HS	0	G	HS	InR-DN	InR-DN	Inr	5080
	Esg		i	4	i_4	HS D0	HS	0	G	HS	InR-DN	InR-DN	Inr	5258
	Esg		i	4	i_4	HS D0	HS	0	G	HS	InR-DN	InR-DN	Inr	4434
	Esg		i	4	i_4	HS D0	HS	0	G	HS	InR-DN	InR-DN	Inr	5176
	Esg		i	4	i_4	HStoHY D7	HStoHY	7	G	HY	InR-DN	InR-DN	Inr	6197
	Esg		i	4	i_4	HStoHY D7	HStoHY	7	G	HY	InR-DN	InR-DN	Inr	7003
	Esg		i	4	i_4	HStoHY D7	HStoHY	7	G	HY	InR-DN	InR-DN	Inr	5927
	Esg		i	4	i_4	HStoHY D7	HStoHY	7	G	HY	InR-DN	InR-DN	Inr	6335
	Esg		i	4	i_4	HStoHY D7	HStoHY	7	G	HY	InR-DN	InR-DN	Inr	5551
	Esg		i	4	i_4	HStoHY D7	HStoHY	7	G	HY	InR-DN	InR-DN	Inr	6497
	Esg		i	4	i_4	HStoHY D7	HStoHY	7	G	HY	InR-DN	InR-DN	Inr	7286
	Esg		i	4	i_4	HStoHY D7	HStoHY	7	G	HY	InR-DN	InR-DN	Inr	6421
	Esg		i	5	i_5	HS D0	HS	0	G	HS	InR-DN	InR-DN	Inr	6520
	Esg		i	5	i_5	HS D0	HS	0	G	HS	InR-DN	InR-DN	Inr	5604
	Esg		i	5	i_5	HS D0	HS	0	G	HS	InR-DN	InR-DN	Inr	5321
	Esg		i	5	i_5	HS D0	HS	0	G	HS	InR-DN	InR-DN	Inr	5617
	Esg		i	5	i_5	HS D0	HS	0	G	HS	InR-DN	InR-DN	Inr	5203
	Esg		i	5	i_5	HS D0	HS	0	G	HS	InR-DN	InR-DN	Inr	4509
	Esg		i	5	i_5	HStoHY D7	HStoHY	7	G	HY	InR-DN	InR-DN	Inr	6662
	Esg		i	5	i_5	HStoHY D7	HStoHY	7	G	HY	InR-DN	InR-DN	Inr	6268
	Esg		i	5	i_5	HStoHY D7	HStoHY	7	G	HY	InR-DN	InR-DN	Inr	5862
	Esg		i	5	i_5	HStoHY D7	HStoHY	7	G	HY	InR-DN	InR-DN	Inr	6149
	Esg		i	5	i_5	HStoHY D7	HStoHY	7	G	HY	InR-DN	InR-DN	Inr	6814
Esg X 12 P1 R1	Esg	12	1	6	1_6	HS D0	HS	0	G	HS	InR-DN	InR-DN	w-Dah	3990.455
Esg X 12 P1 R1	Esg	12	1	6	1_6	HS D0	HS	0	G	HS	InR-DN	InR-DN	w-Dah	3661.935
Esg X 12 P1 R1	Esg	12	1	6	1_6	HS D0	HS	0	G	HS	InR-DN	InR-DN	w-Dah	4582.062
Esg X 12 P1 R1	Esg	12	1	6	1_6	HS D0	HS	0	G	HS	InR-DN	InR-DN	w-Dah	3810.01
Esg X 12 P1 R1	Esg	12	1	6	1_6	HS D0	HS	0	G	HS	InR-DN	InR-DN	w-Dah	4253.503
Esg X 12 P1 R1	Esg	12	1	6	1_6	HS D0	HS	0	G	HS	InR-DN	InR-DN	w-Dah	3918.807
Esg X 12 P1 R1	Esg	12	1	6	1_6	HS D0	HS	0	G	HS	InR-DN	InR-DN	w-Dah	3482.024
Esg X 12 P1 R1	Esg	12	1	6	1_6	HS D0	HS	0	G	HS	InR-DN	InR-DN	w-Dah	4280.577
Esg X 12 P1 R1	Esg	12	1	6	1_6	HS D0	HS	0	G	HS	InR-DN	InR-DN	w-Dah	3711.795
Esg X 12 P1 R1	Esg	12	1	6	1_6	HS D0	HS	0	G	HS	InR-DN	InR-DN	w-Dah	3345.274
Esg X 12 P1 R1	Esg	12	1	6	1_6	HS D0	HS	0	G	HS	InR-DN	InR-DN	w-Dah	3176.865
Esg X 12 P1 R1	Esg	12	1	6	1_6	HStoHY D7	HStoHY	7	G	HY	InR-DN	InR-DN	w-Dah	6290.459
Esg X 12 P1 R1	Esg	12	1	6	1_6	HStoHY D7	HStoHY	7	G	HY	InR-DN	InR-DN	w-Dah	7183.309
Esg X 12 P1 R1	Esg	12	1	6	1_6	HStoHY D7	HStoHY	7	G	HY	InR-DN	InR-DN	w-Dah	5653.942
Esg X 12 P1 R1	Esg	12	1	6	1_6	HStoHY D7	HStoHY	7	G	HY	InR-DN	InR-DN	w-Dah	5752.342
Esg X 12 P1 R1	Esg	12	1	6	1_6	HStoHY D7	HStoHY	7	G	HY	InR-DN	InR-DN	w-Dah	6375.531
Esg X 12 P1 R1	Esg	12	1	6	1_6	HStoHY D7	HStoHY	7	G	HY	InR-DN	InR-DN	w-Dah	5606.411
Esg X 12 P1 R1	Esg	12	1	6	1_6	HStoHY D7	HStoHY	7	G	HY	InR-DN	InR-DN	w-Dah	5069.221
Esg X 12 P1 R1	Esg	12	1	6	1_6	HStoHY D7	HStoHY	7	G	HY	InR-DN	InR-DN	w-Dah	6779.48
Esg X 12 P1 R1	Esg	12	1	6	1_6	HStoHY D7	HStoHY	7	G	HY	InR-DN	InR-DN	w-Dah	6898.474
Esg X 12 P1 R1	Esg	12	1	6	1_6	HStoHY D7	HStoHY	7	G	HY	InR-DN	InR-DN	w-Dah	6987.382
Esg X 12 P1 R1	Esg	12	1	6	1_6	HStoHY D14	HStoHY	14	G	HY	InR-DN	InR-DN	w-Dah	4864.089
Esg X 12 P1 R1	Esg	12	1	6	1_6	HStoHY D14	HStoHY	14	G	HY	InR-DN	InR-DN	w-Dah	5457.549
Esg X 12 P1 R1	Esg	12	1	6	1_6	HStoHY D14	HStoHY	14	G	HY	InR-DN	InR-DN	w-Dah	4996.914
Esg X 12 P1 R1	Esg	12	1	6	1_6	HStoHY D14	HStoHY	14	G	HY	InR-DN	InR-DN	w-Dah	5866.566
Esg X 12 P1 R1	Esg	12	1	6	1_6	HStoHY D14	HStoHY	14	G	HY	InR-DN	InR-DN	w-Dah	5523.171
Esg X 12 P1 R1	Esg	12	1	6	1_6	HStoHY D14	HStoHY	14	G	HY	InR-DN	InR-DN	w-Dah	5654.26
Esg X 12 P1 R1	Esg	12	1	6	1_6	HStoHY D14	HStoHY	14	G	HY	InR-DN	InR-DN	w-Dah	5223.718
Esg X 12 P1 R1	Esg	12	1	6	1_6	HStoHY D14	HStoHY	14	G	HY	InR-DN	InR-DN	w-Dah	5591.397
Esg X 12 P1 R1	Esg	12	1	6	1_6	HStoHY D14	HStoHY	14	G	HY	InR-DN	InR-DN	w-Dah	6310.217
Esg X 12 P1 R1	Esg	12	1	6	1_6	HStoHY D14	HStoHY	14	G	HY	InR-DN	InR-DN	w-Dah	5931.673
Esg X 12 P1 R1	Esg	12	1	6	1_6	HStoHY D21	HStoHY	21	G	HY	InR-DN	InR-DN	w-Dah	6263.417
Esg X 12 P1 R1	Esg	12	1	6	1_6	HStoHY D21	HStoHY	21	G	HY	InR-DN	InR-DN	w-Dah	5462.012
Esg X 12 P1 R1	Esg	12	1	6	1_6	HStoHY D21	HStoHY	21	G	HY	InR-DN	InR-DN	w-Dah	4808.506
Esg X 12 P1 R1	Esg	12	1	6	1_6	HStoHY D21	HStoHY	21	G	HY	InR-DN	InR-DN	w-Dah	5496.051
Esg X 12 P1 R1	Esg	12	1	6	1_6	HStoHY D21	HStoHY	21	G	HY	InR-DN	InR-DN	w-Dah	6220.192
Esg X 12 P1 R1	Esg	12	1	6	1_6	HStoHY D21	HStoHY	21	G	HY	InR-DN	InR-DN	w-Dah	5954.21
Esg X 12 P1 R1	Esg	12	1	6	1_6	HStoHY D21	HStoHY	21	G	HY	InR-DN	InR-DN	w-Dah	5479.875
Esg X 12 P1 R1	Esg	12	1	6	1_6	HStoHY D21	HStoHY	21	G	HY	InR-DN	InR-DN	w-Dah	5877.215
Esg X 12 P1 R1	Esg	12	1	6	1_6	HStoHY D21	HStoHY	21	G	HY	InR-DN	InR-DN	w-Dah	6155.273
Esg X 12 P1 R1	Esg	12	1	6	1_6	HStoHY D28	HStoHY	28	G	HY	InR-DN	InR-DN	w-Dah	6473.478
Esg X 12 P1 R1	Esg	12	1	6	1_6	HStoHY D28	HStoHY	28	G	HY	InR-DN	InR-DN	w-Dah	5746.125
Esg X 12 P1 R1	Esg	12	1	6	1_6	HStoHY D28	HStoHY	28	G	HY	InR-DN	InR-DN	w-Dah	6062.481
Esg X 12 P1 R1	Esg	12	1	6	1_6	HStoHY D28	HStoHY	28	G	HY	InR-DN	InR-DN	w-Dah	7057.883
Esg X 12 P1 R1	Esg	12	1	6	1_6	HStoHY D28	HStoHY	28	G	HY	InR-DN	InR-DN	w-Dah	5564.487
Esg X 12 P1 R1	Esg	12	1	6	1_6	HStoHY D28	HStoHY	28	G	HY	InR-DN	InR-DN	w-Dah	5294.896
Esg X 12 P1 R1	Esg	12	1	6	1_6	HStoHY D28	HStoHY	28	G	HY	InR-DN	InR-DN	w-Dah	6177.161
Esg X 12 P1 R1	Esg	12	1	6	1_6	HStoHY D28	HStoHY	28	G	HY	InR-DN	InR-DN	w-Dah	6070.528
Esg X 12 P1 R1	Esg	12	1	6	1_6	HStoHY D28	HStoHY	28	G	HY	InR-DN	InR-DN	w-Dah	5529.059
Esg X 12 P1 R1	Esg	12	1	6	1_6	HStoHY D28	HStoHY	28	G	HY	InR-DN	InR-DN	w-Dah	5652.333
Esg X 3 P1 R1	Esg	3	1	6	1_6	HS D0	HS	0	G	HS	w-Dah	Control	Control	3785.707
Esg X 3 P1 R1	Esg	3	1	6	1_6	HS D0	HS	0	G	HS	w-Dah	Control	Control	3209.974
Esg X 3 P1 R1	Esg	3	1	6	1_6	HS D0	HS	0	G	HS	w-Dah	Control	Control	3763.285
Esg X 3 P1 R1	Esg	3	1	6	1_6	HS D0	HS	0	G	HS	w-Dah	Control	Control	4459.093
Esg X 3 P1 R1	Esg	3	1	6	1_6	HS D0	HS	0	G	HS	w-Dah	Control	Control	3870.327
Esg X 3 P1 R1	Esg	3	1	6	1_6	HS D0	HS	0	G	HS	w-Dah	Control	Control	3751.606
Esg X 3 P1 R1	Esg	3	1	6	1_6	HS D0	HS	0	G	HS	w-Dah	Control	Control	3591.441
Esg X 3 P1 R1	Esg	3	1	6	1_6	HS D0	HS	0	G	HS	w-Dah	Control	Control	4024.664
Esg X 3 P1 R1	Esg	3	1	6	1_6	HS D0	HS	0	G	HS	w-Dah	Control	Control	4639.595
Esg X 3 P1 R1	Esg	3	1	6	1_6	HStoHY D7	HStoHY	7	G	HY	w-Dah	Control	Control	6313.764
Esg X 3 P1 R1	Esg	3	1	6	1_6	HStoHY D7	HStoHY	7	G	HY	w-Dah	Control	Control	5433.392
Esg X 3 P1 R1	Esg	3	1	6	1_6	HStoHY D7	HStoHY	7	G	HY	w-Dah	Control	Control	6812.063
Esg X 3 P1 R1	Esg	3	1	6	1_6	HStoHY D7	HStoHY	7	G	HY	w-Dah	Control	Control	7050.77
Esg X 3 P1 R1	Esg	3	1	6	1_6	HStoHY D7	HStoHY	7	G	HY	w-Dah	Control	Control	6507.292
Esg X 3 P1 R1	Esg	3	1	6	1_6	HStoHY D7	HStoHY	7	G	HY	w-Dah	Control	Control	6153.085
Esg X 3 P1 R1	Esg	3	1	6	1_6	HStoHY D14	HStoHY	14	G	HY	w-Dah	Control	Control	5623.824
Esg X 3 P1 R1	Esg	3	1	6	1_6	HStoHY D14	HStoHY	14	G	HY	w-Dah	Control	Control	4817.039
Esg X 3 P1 R1	Esg	3	1	6	1_6	HStoHY D14	HStoHY	14	G	HY	w-Dah	Control	Control	4783.763
Esg X 3 P1 R1	Esg	3	1	6	1_6	HStoHY D14	HStoHY	14	G	HY	w-Dah	Control	Control	5000.998
Esg X 3 P1 R1	Esg	3	1	6	1_6	HStoHY D14	HStoHY	14	G	HY	w-Dah	Control	Control	5023.524
Esg X 3 P1 R1	Esg	3	1	6	1_6	HStoHY D14	HStoHY	14	G	HY	w-Dah	Control	Control	4893.028
Esg X 3 P1 R1	Esg	3	1	6	1_6	HStoHY D14	HStoHY	14	G	HY	w-Dah	Control	Control	4626.004
Esg X 3 P1 R1	Esg	3	1	6	1_6	HStoHY D14	HStoHY	14	G	HY	w-Dah	Control	Control	4974.386
Esg X 3 P1 R1	Esg	3	1	6	1_6	HStoHY D14	HStoHY	14	G	HY	w-Dah	Control	Control	5996.853
Esg X 3 P1 R1	Esg	3	1	6	1_6	HStoHY D14	HStoHY	14	G	HY	w-Dah	Control	Control	5476.071
Esg X 3 P1 R1	Esg	3	1	6	1_6	HStoHY D21	HStoHY	21	G	HY	w-Dah	Control	Control	6135.095
Esg X 3 P1 R1	Esg	3	1	6	1_6	HStoHY D21	HStoHY	21	G	HY	w-Dah	Control	Control	5965.057
Esg X 3 P1 R1	Esg	3	1	6	1_6	HStoHY D21	HStoHY	21	G	HY	w-Dah	Control	Control	6003.28
Esg X 3 P1 R1	Esg	3	1	6	1_6	HStoHY D21	HStoHY	21	G	HY	w-Dah	Control	Control	6335.034
Esg X 3 P1 R1	Esg	3	1	6	1_6	HStoHY D21	HStoHY	21	G	HY	w-Dah	Control	Control	6133.239
Esg X 3 P1 R1	Esg	3	1	6	1_6	HStoHY D21	HStoHY	21	G	HY	w-Dah	Control	Control	6556.61
Esg X 3 P1 R1	Esg	3	1	6	1_6	HStoHY D21	HStoHY	21	G	HY	w-Dah	Control	Control	6364.517
Esg X 3 P1 R1	Esg	3	1	6	1_6	HStoHY D21	HStoHY	21	G	HY	w-Dah	Control	Control	6833.969
Esg X 3 P1 R1	Esg	3	1	6	1_6	HStoHY D28	HStoHY	28	G	HY	w-Dah	Control	Control	5036.9
Esg X 3 P1 R1	Esg	3	1	6	1_6	HStoHY D28	HStoHY	28	G	HY	w-Dah	Control	Control	5789.745
Esg X 3 P1 R1	Esg	3	1	6	1_6	HStoHY D28	HStoHY	28	G	HY	w-Dah	Control	Control	6836.988
Esg X 3 P1 R1	Esg	3	1	6	1_6	HStoHY D28	HStoHY	28	G	HY	w-Dah	Control	Control	6048.236
Esg X 3 P1 R1	Esg	3	1	6	1_6	HStoHY D28	HStoHY	28	G	HY	w-Dah	Control	Control	6022.572
Esg X 3 P1 R1	Esg	3	1	6	1_6	HStoHY D28	HStoHY	28	G	HY	w-Dah	Control	Control	5682.894
Esg X 6 PT2 R1	Esg	6	T2	1	T2_1	HY D0	HY	0	S	HY	w-Dah	Control	Control	5311.14
Esg X 6 PT2 R1	Esg	6	T2	1	T2_1	HY D0	HY	0	S	HY	w-Dah	Control	Control	5025.368
Esg X 6 PT2 R1	Esg	6	T2	1	T2_1	HY D0	HY	0	S	HY	w-Dah	Control	Control	5022.638
Esg X 6 PT2 R1	Esg	6	T2	1	T2_1	HY D0	HY	0	S	HY	w-Dah	Control	Control	5098.661
Esg X 6 PT2 R1	Esg	6	T2	1	T2_1	HY D0	HY	0	S	HY	w-Dah	Control	Control	6259.902
Esg X 6 PT2 R1	Esg	6	T2	1	T2_1	HY D0	HY	0	S	HY	w-Dah	Control	Control	4821.275
Esg X 6 PT2 R1	Esg	6	T2	1	T2_1	HY D0	HY	0	S	HY	w-Dah	Control	Control	4903.071
Esg X 6 PT2 R1	Esg	6	T2	1	T2_1	HY D0	HY	0	S	HY	w-Dah	Control	Control	5445.672
Esg X 6 PT2 R1	Esg	6	T2	1	T2_1	HY D0	HY	0	S	HY	w-Dah	Control	Control	5032.177
Esg X 6 PT2 R1	Esg	6	T2	1	T2_1	HY D0	HY	0	S	HY	w-Dah	Control	Control	4465.341
Esg X 6 PT2 R1	Esg	6	T2	1	T2_1	HS D0	HS	0	G	HS	w-Dah	Control	Control	5574.301
Esg X 6 PT2 R1	Esg	6	T2	1	T2_1	HS D0	HS	0	G	HS	w-Dah	Control	Control	3903.747
Esg X 6 PT2 R1	Esg	6	T2	1	T2_1	HS D0	HS	0	G	HS	w-Dah	Control	Control	4155.322
Esg X 6 PT2 R1	Esg	6	T2	1	T2_1	HS D0	HS	0	G	HS	w-Dah	Control	Control	3719.657
Esg X 6 PT2 R1	Esg	6	T2	1	T2_1	HS D0	HS	0	G	HS	w-Dah	Control	Control	4167.179
Esg X 6 PT2 R1	Esg	6	T2	1	T2_1	HS D0	HS	0	G	HS	w-Dah	Control	Control	3661.807
Esg X 6 PT2 R1	Esg	6	T2	1	T2_1	HS D0	HS	0	G	HS	w-Dah	Control	Control	3543.415
Esg X 6 PT2 R1	Esg	6	T2	1	T2_1	HS D0	HS	0	G	HS	w-Dah	Control	Control	4612.638
Esg X 6 PT2 R1	Esg	6	T2	1	T2_1	HS D0	HS	0	G	HS	w-Dah	Control	Control	3481.381
Esg X 6 PT2 R1	Esg	6	T2	1	T2_1	HS D0	HS	0	G	HS	w-Dah	Control	Control	5303.192
Esg X 6 PT2 R1	Esg	6	T2	1	T2_1	HYtoHS D7	HYtoHS	7	S	HS	w-Dah	Control	Control	4437.572
Esg X 6 PT2 R1	Esg	6	T2	1	T2_1	HYtoHS D7	HYtoHS	7	S	HS	w-Dah	Control	Control	2905.619
Esg X 6 PT2 R1	Esg	6	T2	1	T2_1	HYtoHS D7	HYtoHS	7	S	HS	w-Dah	Control	Control	5283.435
Esg X 6 PT2 R1	Esg	6	T2	1	T2_1	HYtoHS D7	HYtoHS	7	S	HS	w-Dah	Control	Control	4599.381
Esg X 6 PT2 R1	Esg	6	T2	1	T2_1	HYtoHS D7	HYtoHS	7	S	HS	w-Dah	Control	Control	3877.464
Esg X 6 PT2 R1	Esg	6	T2	1	T2_1	HYtoHS D7	HYtoHS	7	S	HS	w-Dah	Control	Control	5490.465
Esg X 6 PT2 R1	Esg	6	T2	1	T2_1	HYtoHS D7	HYtoHS	7	S	HS	w-Dah	Control	Control	4968.334
Esg X 6 PT2 R1	Esg	6	T2	1	T2_1	HYtoHS D7	HYtoHS	7	S	HS	w-Dah	Control	Control	4742.437
Esg X 6 PT2 R1	Esg	6	T2	1	T2_1	HYtoHS D7	HYtoHS	7	S	HS	w-Dah	Control	Control	4617.378
Esg X 6 PT2 R1	Esg	6	T2	1	T2_1	HYtoHS D7	HYtoHS	7	S	HS	w-Dah	Control	Control	4311.408
Esg X 6 PT2 R1	Esg	6	T2	1	T2_1	HStoHY D7	HStoHY	7	G	HY	w-Dah	Control	Control	4881.539
Esg X 6 PT2 R1	Esg	6	T2	1	T2_1	HStoHY D7	HStoHY	7	G	HY	w-Dah	Control	Control	6006.116
Esg X 6 PT2 R1	Esg	6	T2	1	T2_1	HStoHY D7	HStoHY	7	G	HY	w-Dah	Control	Control	5344.151
Esg X 6 PT2 R1	Esg	6	T2	1	T2_1	HStoHY D7	HStoHY	7	G	HY	w-Dah	Control	Control	7101.638
Esg X 6 PT2 R1	Esg	6	T2	1	T2_1	HStoHY D7	HStoHY	7	G	HY	w-Dah	Control	Control	5940.574
Esg X 6 PT2 R1	Esg	6	T2	1	T2_1	HStoHY D7	HStoHY	7	G	HY	w-Dah	Control	Control	4209.324
Esg X 6 PT2 R1	Esg	6	T2	1	T2_1	HStoHY D7	HStoHY	7	G	HY	w-Dah	Control	Control	4875.523
Esg X 4 Pattp40 R2	Esg	4	attp40	2	attp40_2	HS D0	HS	0	G	HS	w-Dah	Control	Control	4142.369
Esg X 4 Pattp40 R2	Esg	4	attp40	2	attp40_2	HS D0	HS	0	G	HS	w-Dah	Control	Control	3855.195
Esg X 4 Pattp40 R2	Esg	4	attp40	2	attp40_2	HS D0	HS	0	G	HS	w-Dah	Control	Control	3685.69
Esg X 4 Pattp40 R2	Esg	4	attp40	2	attp40_2	HS D0	HS	0	G	HS	w-Dah	Control	Control	5230.125
Esg X 4 Pattp40 R2	Esg	4	attp40	2	attp40_2	HS D0	HS	0	G	HS	w-Dah	Control	Control	3445.86
Esg X 4 Pattp40 R2	Esg	4	attp40	2	attp40_2	HS D0	HS	0	G	HS	w-Dah	Control	Control	3535.596
Esg X 4 Pattp40 R2	Esg	4	attp40	2	attp40_2	HS D0	HS	0	G	HS	w-Dah	Control	Control	3469.015
Esg X 4 Pattp40 R2	Esg	4	attp40	2	attp40_2	HS D0	HS	0	G	HS	w-Dah	Control	Control	3296.025
Esg X 4 Pattp40 R2	Esg	4	attp40	2	attp40_2	HYtoHS D7	HYtoHS	7	S	HS	w-Dah	Control	Control	4146.315
Esg X 4 Pattp40 R2	Esg	4	attp40	2	attp40_2	HYtoHS D7	HYtoHS	7	S	HS	w-Dah	Control	Control	4438.038
Esg X 4 Pattp40 R2	Esg	4	attp40	2	attp40_2	HYtoHS D7	HYtoHS	7	S	HS	w-Dah	Control	Control	4021.277
Esg X 4 Pattp40 R2	Esg	4	attp40	2	attp40_2	HYtoHS D7	HYtoHS	7	S	HS	w-Dah	Control	Control	4918.728
Esg X 4 Pattp40 R2	Esg	4	attp40	2	attp40_2	HYtoHS D7	HYtoHS	7	S	HS	w-Dah	Control	Control	5917.034
Esg X 4 Pattp40 R2	Esg	4	attp40	2	attp40_2	HYtoHS D7	HYtoHS	7	S	HS	w-Dah	Control	Control	4741.039
Esg X 4 Pattp40 R2	Esg	4	attp40	2	attp40_2	HYtoHS D7	HYtoHS	7	S	HS	w-Dah	Control	Control	4447.815
Esg X 4 Pattp40 R2	Esg	4	attp40	2	attp40_2	HYtoHS D7	HYtoHS	7	S	HS	w-Dah	Control	Control	4646.936
Esg X 4 Pattp40 R2	Esg	4	attp40	2	attp40_2	HYtoHS D7	HYtoHS	7	S	HS	w-Dah	Control	Control	3591.685
Esg X 4 Pattp40 R2	Esg	4	attp40	2	attp40_2	HYtoHS D7	HYtoHS	7	S	HS	w-Dah	Control	Control	4398.848
Esg X 4 Pattp40 R2	Esg	4	attp40	2	attp40_2	HY D0	HY	0	S	HY	w-Dah	Control	Control	6718.049
Esg X 4 Pattp40 R2	Esg	4	attp40	2	attp40_2	HY D0	HY	0	S	HY	w-Dah	Control	Control	6464.153
Esg X 4 Pattp40 R2	Esg	4	attp40	2	attp40_2	HY D0	HY	0	S	HY	w-Dah	Control	Control	6492.262
Esg X 4 Pattp40 R2	Esg	4	attp40	2	attp40_2	HY D0	HY	0	S	HY	w-Dah	Control	Control	7104.29
Esg X 4 Pattp40 R2	Esg	4	attp40	2	attp40_2	HY D0	HY	0	S	HY	w-Dah	Control	Control	7461.579
Esg X 4 Pattp40 R2	Esg	4	attp40	2	attp40_2	HY D0	HY	0	S	HY	w-Dah	Control	Control	6778.699
Esg X 4 Pattp40 R2	Esg	4	attp40	2	attp40_2	HY D0	HY	0	S	HY	w-Dah	Control	Control	6133.451
Esg X 4 Pattp40 R2	Esg	4	attp40	2	attp40_2	HY D0	HY	0	S	HY	w-Dah	Control	Control	7388.501
Esg X 4 Pattp40 R2	Esg	4	attp40	2	attp40_2	HY D0	HY	0	S	HY	w-Dah	Control	Control	7038.836
Esg X 4 Pattp40 R2	Esg	4	attp40	2	attp40_2	HStoHY D7	HStoHY	7	G	HY	w-Dah	Control	Control	4656.566
Esg X 4 Pattp40 R2	Esg	4	attp40	2	attp40_2	HStoHY D7	HStoHY	7	G	HY	w-Dah	Control	Control	5029.488
Esg X 4 Pattp40 R2	Esg	4	attp40	2	attp40_2	HStoHY D7	HStoHY	7	G	HY	w-Dah	Control	Control	5146.298
Esg X 4 Pattp40 R2	Esg	4	attp40	2	attp40_2	HStoHY D7	HStoHY	7	G	HY	w-Dah	Control	Control	5361.984
Esg X 4 Pattp40 R2	Esg	4	attp40	2	attp40_2	HStoHY D7	HStoHY	7	G	HY	w-Dah	Control	Control	5403.041
Esg X 4 Pattp40 R2	Esg	4	attp40	2	attp40_2	HStoHY D7	HStoHY	7	G	HY	w-Dah	Control	Control	5287.12
Esg X 4 Pattp40 R2	Esg	4	attp40	2	attp40_2	HStoHY D7	HStoHY	7	G	HY	w-Dah	Control	Control	5431.979
Esg X 4 Pattp40 R2	Esg	4	attp40	2	attp40_2	HStoHY D7	HStoHY	7	G	HY	w-Dah	Control	Control	5922.934
	Esg		i	3	i_3	HS D0	HS	0	G	HS	w-Dah	Control	Inr	4719
	Esg		i	3	i_3	HS D0	HS	0	G	HS	w-Dah	Control	Inr	5247
	Esg		i	3	i_3	HS D0	HS	0	G	HS	w-Dah	Control	Inr	5451
	Esg		i	3	i_3	HS D0	HS	0	G	HS	w-Dah	Control	Inr	6094
	Esg		i	3	i_3	HS D0	HS	0	G	HS	w-Dah	Control	Inr	4916
	Esg		i	3	i_3	HS D0	HS	0	G	HS	w-Dah	Control	Inr	5396
	Esg		i	3	i_3	HS D0	HS	0	G	HS	w-Dah	Control	Inr	4457
	Esg		i	3	i_3	HS D0	HS	0	G	HS	w-Dah	Control	Inr	5353
	Esg		i	3	i_3	HStoHY D7	HStoHY	7	G	HY	w-Dah	Control	Inr	5353
	Esg		i	3	i_3	HStoHY D7	HStoHY	7	G	HY	w-Dah	Control	Inr	6511
	Esg		i	3	i_3	HStoHY D7	HStoHY	7	G	HY	w-Dah	Control	Inr	5051
	Esg		i	3	i_3	HStoHY D7	HStoHY	7	G	HY	w-Dah	Control	Inr	7436
	Esg		i	3	i_3	HStoHY D7	HStoHY	7	G	HY	w-Dah	Control	Inr	5399
	Esg		i	3	i_3	HStoHY D7	HStoHY	7	G	HY	w-Dah	Control	Inr	7146
	Esg		i	3	i_3	HStoHY D7	HStoHY	7	G	HY	w-Dah	Control	Inr	6503
	Esg		i	3	i_3	HStoHY D7	HStoHY	7	G	HY	w-Dah	Control	Inr	5863
	Esg		i	3	i_3	HStoHY D7	HStoHY	7	G	HY	w-Dah	Control	Inr	5242
	Esg		i	4	i_4	HS D0	HS	0	G	HS	w-Dah	Control	Inr	6727
	Esg		i	4	i_4	HS D0	HS	0	G	HS	w-Dah	Control	Inr	6045
	Esg		i	4	i_4	HS D0	HS	0	G	HS	w-Dah	Control	Inr	4863
	Esg		i	4	i_4	HS D0	HS	0	G	HS	w-Dah	Control	Inr	7318
	Esg		i	4	i_4	HS D0	HS	0	G	HS	w-Dah	Control	Inr	5642
	Esg		i	4	i_4	HStoHY D7	HStoHY	7	G	HY	w-Dah	Control	Inr	7056
	Esg		i	4	i_4	HStoHY D7	HStoHY	7	G	HY	w-Dah	Control	Inr	7833
	Esg		i	4	i_4	HStoHY D7	HStoHY	7	G	HY	w-Dah	Control	Inr	7017
	Esg		i	4	i_4	HStoHY D7	HStoHY	7	G	HY	w-Dah	Control	Inr	5875
	Esg		i	4	i_4	HStoHY D7	HStoHY	7	G	HY	w-Dah	Control	Inr	7906
	Esg		i	4	i_4	HStoHY D7	HStoHY	7	G	HY	w-Dah	Control	Inr	6765
	Esg		i	4	i_4	HStoHY D7	HStoHY	7	G	HY	w-Dah	Control	Inr	7937
	Esg		i	4	i_4	HStoHY D7	HStoHY	7	G	HY	w-Dah	Control	Inr	7877
	Esg		i	4	i_4	HStoHY D7	HStoHY	7	G	HY	w-Dah	Control	Inr	6617
	Esg		i	4	i_4	HStoHY D7	HStoHY	7	G	HY	w-Dah	Control	Inr	6454
	Esg		i	5	i_5	HS D0	HS	0	G	HS	w-Dah	Control	Inr	6027
	Esg		i	5	i_5	HS D0	HS	0	G	HS	w-Dah	Control	Inr	5743
	Esg		i	5	i_5	HS D0	HS	0	G	HS	w-Dah	Control	Inr	5101
	Esg		i	5	i_5	HS D0	HS	0	G	HS	w-Dah	Control	Inr	5940
	Esg		i	5	i_5	HS D0	HS	0	G	HS	w-Dah	Control	Inr	5231
	Esg		i	5	i_5	HS D0	HS	0	G	HS	w-Dah	Control	Inr	5042
	Esg		i	5	i_5	HS D0	HS	0	G	HS	w-Dah	Control	Inr	5248
	Esg		i	5	i_5	HStoHY D7	HStoHY	7	G	HY	w-Dah	Control	Inr	6516
	Esg		i	5	i_5	HStoHY D7	HStoHY	7	G	HY	w-Dah	Control	Inr	6613
	Esg		i	5	i_5	HStoHY D7	HStoHY	7	G	HY	w-Dah	Control	Inr	5269
	Esg		i	5	i_5	HStoHY D7	HStoHY	7	G	HY	w-Dah	Control	Inr	4703
	Esg		i	5	i_5	HStoHY D7	HStoHY	7	G	HY	w-Dah	Control	Inr	5409
	Esg		i	5	i_5	HStoHY D7	HStoHY	7	G	HY	w-Dah	Control	Inr	6355
	Esg		i	5	i_5	HStoHY D7	HStoHY	7	G	HY	w-Dah	Control	Inr	6196
