# Supplementary material for: Multiscale analysis reveals that diet-dependent midgut plasticity emerges from alterations in both stem cell niche coupling and enterocyte size
Source: eLife. 2021 Sep 23;10:e64125. doi: 10.7554/eLife.64125 (PMC8528489; doi:10.7554/eLife.64125)
Supplement: Figure 6—source data 6. [file elife-64125-fig6-data6.csv]

Female.Line	Repeat	Diet	Day	C.G	Male.Line.ID	Male.Line	Region	GutNumber	Area
Esg	1	HS	0	HS	60012	Egfr-IR	4	1	202.198
Esg	1	HS	0	HS	60012	Egfr-IR	4	1	157.93
Esg	1	HS	0	HS	60012	Egfr-IR	4	1	134.6
Esg	1	HS	0	HS	60012	Egfr-IR	4	1	126.823
Esg	1	HS	0	HS	60012	Egfr-IR	4	1	142.376
Esg	1	HS	0	HS	60012	Egfr-IR	4	1	223.535
Esg	1	HS	0	HS	60012	Egfr-IR	4	1	196.416
Esg	1	HS	0	HS	60012	Egfr-IR	4	1	118.448
Esg	1	HS	0	HS	60012	Egfr-IR	4	1	137.192
Esg	1	HS	0	HS	60012	Egfr-IR	4	1	126.823
Esg	1	HS	0	HS	60012	Egfr-IR	4	2	297.315
Esg	1	HS	0	HS	60012	Egfr-IR	4	2	169.296
Esg	1	HS	0	HS	60012	Egfr-IR	4	2	203.195
Esg	1	HS	0	HS	60012	Egfr-IR	4	2	205.19
Esg	1	HS	0	HS	60012	Egfr-IR	4	2	157.731
Esg	1	HS	0	HS	60012	Egfr-IR	4	2	198.21
Esg	1	HS	0	HS	60012	Egfr-IR	4	2	157.531
Esg	1	HS	0	HS	60012	Egfr-IR	4	2	409.98
Esg	1	HS	0	HS	60012	Egfr-IR	4	2	403.4
Esg	1	HS	0	HS	60012	Egfr-IR	4	2	313.268
Esg	1	HS	0	HS	60012	Egfr-IR	4	2	200.204
Esg	1	HS	0	HS	60012	Egfr-IR	4	3	187.642
Esg	1	HS	0	HS	60012	Egfr-IR	4	3	113.263
Esg	1	HS	0	HS	60012	Egfr-IR	4	3	98.108
Esg	1	HS	0	HS	60012	Egfr-IR	4	3	100.302
Esg	1	HS	0	HS	60012	Egfr-IR	4	3	97.31
Esg	1	HS	0	HS	60012	Egfr-IR	4	3	188.041
Esg	1	HS	0	HS	60012	Egfr-IR	4	3	63.611
Esg	1	HS	0	HS	60012	Egfr-IR	4	3	68.397
Esg	1	HS	0	HS	60012	Egfr-IR	4	3	53.441
Esg	1	HS	0	HS	60012	Egfr-IR	4	3	188.639
Esg	1	HS	0	HS	60012	Egfr-IR	4	4	115.058
Esg	1	HS	0	HS	60012	Egfr-IR	4	4	85.745
Esg	1	HS	0	HS	60012	Egfr-IR	4	4	67.399
Esg	1	HS	0	HS	60012	Egfr-IR	4	4	48.855
Esg	1	HS	0	HS	60012	Egfr-IR	4	4	59.623
Esg	1	HS	0	HS	60012	Egfr-IR	4	4	139.385
Esg	1	HS	0	HS	60012	Egfr-IR	4	4	86.543
Esg	1	HS	0	HS	60012	Egfr-IR	4	5	319.848
Esg	1	HS	0	HS	60012	Egfr-IR	4	5	135.397
Esg	1	HS	0	HS	60012	Egfr-IR	4	5	235.101
Esg	1	HS	0	HS	60012	Egfr-IR	4	5	290.934
Esg	1	HS	0	HS	60012	Egfr-IR	4	5	120.442
Esg	1	HS	0	HS	60012	Egfr-IR	4	5	147.96
Esg	1	HS	0	HS	60012	Egfr-IR	4	5	194.422
Esg	1	HS	0	HS	60012	Egfr-IR	4	5	146.564
Esg	1	HS	0	HS	60012	Egfr-IR	4	5	127.62
Esg	1	HS	0	HS	60012	Egfr-IR	4	5	132.207
Esg	1	HS	0	HS	60012	Egfr-IR	4	5	245.669
Esg	1	HS	0	HS	60012	Egfr-IR	4	5	233.705
Esg	1	HS	0	HS	60012	Egfr-IR	4	5	232.708
Esg	1	HS	0	HS	60012	Egfr-IR	4	5	128.817
Esg	1	HS	0	HS	60012	Egfr-IR	4	5	113.662
Esg	1	HS	0	HS	60012	Egfr-IR	4	6	165.308
Esg	1	HS	0	HS	60012	Egfr-IR	4	6	140.382
Esg	1	HS	0	HS	60012	Egfr-IR	4	6	165.906
Esg	1	HS	0	HS	60012	Egfr-IR	4	6	117.251
Esg	1	HS	0	HS	60012	Egfr-IR	4	6	166.704
Esg	1	HS	0	HS	60012	Egfr-IR	4	6	102.296
Esg	1	HS	0	HS	60012	Egfr-IR	4	6	154.74
Esg	1	HS	0	HS	60012	Egfr-IR	4	6	124.829
Esg	1	HS	0	HS	60012	Egfr-IR	4	6	98.108
Esg	1	HS	0	HS	60012	Egfr-IR	4	6	103.293
Esg	1	HS	0	HS	60012	Egfr-IR	4	7	136.793
Esg	1	HS	0	HS	60012	Egfr-IR	4	7	90.929
Esg	1	HS	0	HS	60012	Egfr-IR	4	7	110.471
Esg	1	HS	0	HS	60012	Egfr-IR	4	7	89.932
Esg	1	HS	0	HS	60012	Egfr-IR	4	7	96.313
Esg	1	HS	0	HS	60012	Egfr-IR	4	7	125.626
Esg	1	HS	0	HS	60012	Egfr-IR	4	7	109.873
Esg	1	HS	0	HS	60012	Egfr-IR	4	7	120.242
Esg	1	HS	0	HS	60012	Egfr-IR	4	7	79.164
Esg	1	HS	0	HS	60012	Egfr-IR	4	7	65.405
Esg	1	HS	0	HS	60012	Egfr-IR	4	7	157.133
Esg	1	HS	0	HS	60012	Egfr-IR	4	8	124.43
Esg	1	HS	0	HS	60012	Egfr-IR	4	8	121.439
Esg	1	HS	0	HS	60012	Egfr-IR	4	8	156.933
Esg	1	HS	0	HS	60012	Egfr-IR	4	8	110.87
Esg	1	HS	0	HS	60012	Egfr-IR	4	8	155.338
Esg	1	HS	0	HS	60012	Egfr-IR	4	8	108.677
Esg	1	HS	0	HS	60012	Egfr-IR	4	8	154.54
Esg	1	HS	0	HS	60012	Egfr-IR	4	8	172.287
Esg	1	HS	0	HS	60012	Egfr-IR	4	8	73.182
Esg	1	HS	0	HS	60012	Egfr-IR	4	8	108.278
Esg	1	HS	0	HS	60012	Egfr-IR	4	9	170.892
Esg	1	HS	0	HS	60012	Egfr-IR	4	9	103.492
Esg	1	HS	0	HS	60012	Egfr-IR	4	9	104.689
Esg	1	HS	0	HS	60012	Egfr-IR	4	9	103.891
Esg	1	HS	0	HS	60012	Egfr-IR	4	9	79.364
Esg	1	HS	0	HS	60012	Egfr-IR	4	9	92.924
Esg	1	HS	0	HS	60012	Egfr-IR	4	9	82.156
Esg	1	HS	0	HS	60012	Egfr-IR	4	9	97.31
Esg	1	HS	0	HS	60012	Egfr-IR	4	9	101.299
Esg	1	HS	0	HS	60012	Egfr-IR	4	9	75.376
Esg	1	HS	0	HS	60012	Egfr-IR	4	9	105.287
Esg	1	HS	0	HS	60012	Egfr-IR	4	9	85.545
Esg	1	HS	0	HS	60012	Egfr-IR	4	9	92.126
Esg	1	HStoHY	7	HY	60012	Egfr-IR	4	1	344.176
Esg	1	HStoHY	7	HY	60012	Egfr-IR	4	1	678.98
Esg	1	HStoHY	7	HY	60012	Egfr-IR	4	1	449.662
Esg	1	HStoHY	7	HY	60012	Egfr-IR	4	1	627.533
Esg	1	HStoHY	7	HY	60012	Egfr-IR	4	1	649.069
Esg	1	HStoHY	7	HY	60012	Egfr-IR	4	1	698.921
Esg	1	HStoHY	7	HY	60012	Egfr-IR	4	1	392.233
Esg	1	HStoHY	7	HY	60012	Egfr-IR	4	1	637.304
Esg	1	HStoHY	7	HY	60012	Egfr-IR	4	1	407.787
Esg	1	HStoHY	7	HY	60012	Egfr-IR	4	1	715.272
Esg	1	HStoHY	7	HY	60012	Egfr-IR	4	1	445.275
Esg	1	HStoHY	7	HY	60012	Egfr-IR	4	1	409.382
Esg	1	HStoHY	7	HY	60012	Egfr-IR	4	1	443.082
Esg	1	HStoHY	7	HY	60012	Egfr-IR	4	1	324.834
Esg	1	HStoHY	7	HY	60012	Egfr-IR	4	2	613.575
Esg	1	HStoHY	7	HY	60012	Egfr-IR	4	2	266.009
Esg	1	HStoHY	7	HY	60012	Egfr-IR	4	2	672.599
Esg	1	HStoHY	7	HY	60012	Egfr-IR	4	2	435.504
Esg	1	HStoHY	7	HY	60012	Egfr-IR	4	2	388.245
Esg	1	HStoHY	7	HY	60012	Egfr-IR	4	2	291.533
Esg	1	HStoHY	7	HY	60012	Egfr-IR	4	2	294.125
Esg	1	HStoHY	7	HY	60012	Egfr-IR	4	2	757.746
Esg	1	HStoHY	7	HY	60012	Egfr-IR	4	2	328.622
Esg	1	HStoHY	7	HY	60012	Egfr-IR	4	2	308.283
Esg	1	HStoHY	7	HY	60012	Egfr-IR	4	2	429.323
Esg	1	HStoHY	7	HY	60012	Egfr-IR	4	2	531.22
Esg	1	HStoHY	7	HY	60012	Egfr-IR	4	2	753.957
Esg	1	HStoHY	7	HY	60012	Egfr-IR	4	2	445.674
Esg	1	HStoHY	7	HY	60012	Egfr-IR	4	2	470.799
Esg	1	HStoHY	7	HY	60012	Egfr-IR	4	2	387.846
Esg	1	HStoHY	7	HY	60012	Egfr-IR	4	2	422.942
Esg	1	HStoHY	7	HY	60012	Egfr-IR	4	3	717.067
Esg	1	HStoHY	7	HY	60012	Egfr-IR	4	3	735.611
Esg	1	HStoHY	7	HY	60012	Egfr-IR	4	3	517.261
Esg	1	HStoHY	7	HY	60012	Egfr-IR	4	3	502.904
Esg	1	HStoHY	7	HY	60012	Egfr-IR	4	3	390.239
Esg	1	HStoHY	7	HY	60012	Egfr-IR	4	3	245.868
Esg	1	HStoHY	7	HY	60012	Egfr-IR	4	3	562.128
Esg	1	HStoHY	7	HY	60012	Egfr-IR	4	3	387.447
Esg	1	HStoHY	7	HY	60012	Egfr-IR	4	3	355.742
Esg	1	HStoHY	7	HY	60012	Egfr-IR	4	3	419.751
Esg	1	HStoHY	7	HY	60012	Egfr-IR	4	3	399.212
Esg	1	HStoHY	7	HY	60012	Egfr-IR	4	3	322.441
Esg	1	HStoHY	7	HY	60012	Egfr-IR	4	3	509.684
Esg	1	HStoHY	7	HY	60012	Egfr-IR	4	3	667.813
Esg	1	HStoHY	7	HY	60012	Egfr-IR	4	3	701.513
Esg	1	HStoHY	7	HY	60012	Egfr-IR	4	3	573.893
Esg	1	HStoHY	7	HY	60012	Egfr-IR	4	3	453.451
Esg	1	HStoHY	7	HY	60012	Egfr-IR	4	3	552.755
Esg	1	HStoHY	7	HY	60012	Egfr-IR	4	3	510.88
Esg	1	HStoHY	7	HY	60012	Egfr-IR	4	3	548.767
Esg	1	HStoHY	7	HY	60012	Egfr-IR	4	4	512.475
Esg	1	HStoHY	7	HY	60012	Egfr-IR	4	4	412.573
Esg	1	HStoHY	7	HY	60012	Egfr-IR	4	4	657.643
Esg	1	HStoHY	7	HY	60012	Egfr-IR	4	4	642.09
Esg	1	HStoHY	7	HY	60012	Egfr-IR	4	4	298.911
Esg	1	HStoHY	7	HY	60012	Egfr-IR	4	4	574.291
Esg	1	HStoHY	7	HY	60012	Egfr-IR	4	4	258.032
Esg	1	HStoHY	7	HY	60012	Egfr-IR	4	4	562.327
Esg	1	HStoHY	7	HY	60012	Egfr-IR	4	4	497.52
Esg	1	HStoHY	7	HY	60012	Egfr-IR	4	4	706.299
Esg	1	HStoHY	7	HY	60012	Egfr-IR	4	5	459.633
Esg	1	HStoHY	7	HY	60012	Egfr-IR	4	5	420.15
Esg	1	HStoHY	7	HY	60012	Egfr-IR	4	5	462.025
Esg	1	HStoHY	7	HY	60012	Egfr-IR	4	5	381.266
Esg	1	HStoHY	7	HY	60012	Egfr-IR	4	5	181.061
Esg	1	HStoHY	7	HY	60012	Egfr-IR	4	5	327.825
Esg	1	HStoHY	7	HY	60012	Egfr-IR	4	5	422.742
Esg	1	HStoHY	7	HY	60012	Egfr-IR	4	5	356.34
Esg	1	HStoHY	7	HY	60012	Egfr-IR	4	5	341.584
Esg	1	HStoHY	7	HY	60012	Egfr-IR	4	5	411.775
Esg	1	HStoHY	7	HY	60012	Egfr-IR	4	5	379.471
Esg	1	HStoHY	7	HY	60012	Egfr-IR	4	5	397.019
Esg	1	HStoHY	7	HY	60012	Egfr-IR	4	5	225.928
Esg	1	HStoHY	7	HY	60012	Egfr-IR	4	5	290.536
Esg	1	HStoHY	7	HY	60012	Egfr-IR	4	5	289.14
Esg	1	HStoHY	7	HY	60012	Egfr-IR	4	5	336.599
Esg	1	HStoHY	7	HY	60012	Egfr-IR	4	5	601.211
Esg	1	HStoHY	7	HY	60012	Egfr-IR	4	5	196.814
Esg	1	HStoHY	7	HY	60012	Egfr-IR	4	5	344.375
Esg	1	HStoHY	7	HY	60012	Egfr-IR	4	5	417.957
Esg	1	HStoHY	7	HY	60012	Egfr-IR	4	6	594.232
Esg	1	HStoHY	7	HY	60012	Egfr-IR	4	6	440.091
Esg	1	HStoHY	7	HY	60012	Egfr-IR	4	6	591.44
Esg	1	HStoHY	7	HY	60012	Egfr-IR	4	6	473.192
Esg	1	HStoHY	7	HY	60012	Egfr-IR	4	6	506.892
Esg	1	HStoHY	7	HY	60012	Egfr-IR	4	6	472.195
Esg	1	HStoHY	7	HY	60012	Egfr-IR	4	6	451.656
Esg	1	HStoHY	7	HY	60012	Egfr-IR	4	6	391.236
Esg	1	HStoHY	7	HY	60012	Egfr-IR	4	6	310.875
Esg	1	HStoHY	7	HY	60012	Egfr-IR	4	6	448.865
Esg	1	HStoHY	7	HY	60012	Egfr-IR	4	6	446.671
Esg	1	HStoHY	7	HY	60012	Egfr-IR	4	6	509.684
Esg	1	HStoHY	7	HY	60012	Egfr-IR	4	6	384.855
Esg	1	HStoHY	7	HY	60012	Egfr-IR	4	6	476.183
Esg	1	HStoHY	7	HY	60012	Egfr-IR	4	6	632.718
Esg	1	HStoHY	7	HY	60012	Egfr-IR	4	6	468.606
Esg	1	HStoHY	7	HY	60012	Egfr-IR	4	6	496.722
Esg	1	HStoHY	7	HY	60012	Egfr-IR	4	7	382.063
Esg	1	HStoHY	7	HY	60012	Egfr-IR	4	7	384.656
Esg	1	HStoHY	7	HY	60012	Egfr-IR	4	7	423.34
Esg	1	HStoHY	7	HY	60012	Egfr-IR	4	7	365.911
Esg	1	HStoHY	7	HY	60012	Egfr-IR	4	7	460.63
Esg	1	HStoHY	7	HY	60012	Egfr-IR	4	7	362.322
Esg	1	HStoHY	7	HY	60012	Egfr-IR	4	7	237.493
Esg	1	HStoHY	7	HY	60012	Egfr-IR	4	7	381.066
Esg	1	HStoHY	7	HY	60012	Egfr-IR	4	7	385.453
Esg	1	HStoHY	7	HY	60012	Egfr-IR	4	7	199.008
Esg	1	HStoHY	7	HY	60012	Egfr-IR	4	7	245.47
Esg	1	HStoHY	7	HY	60012	Egfr-IR	4	7	478.975
Esg	1	HStoHY	7	HY	60012	Egfr-IR	4	8	373.888
Esg	1	HStoHY	7	HY	60012	Egfr-IR	4	8	345.572
Esg	1	HStoHY	7	HY	60012	Egfr-IR	4	8	453.65
Esg	1	HStoHY	7	HY	60012	Egfr-IR	4	8	542.187
Esg	1	HStoHY	7	HY	60012	Egfr-IR	4	8	471.198
Esg	1	HStoHY	7	HY	60012	Egfr-IR	4	8	365.712
Esg	1	HStoHY	7	HY	60012	Egfr-IR	4	8	418.754
Esg	1	HStoHY	7	HY	60012	Egfr-IR	4	8	454.448
Esg	1	HStoHY	7	HY	60012	Egfr-IR	4	8	445.674
Esg	1	HStoHY	7	HY	60012	Egfr-IR	4	8	538.398
Esg	1	HStoHY	7	HY	60012	Egfr-IR	4	8	590.045
Esg	1	HStoHY	7	HY	60012	Egfr-IR	4	8	448.466
Esg	1	HStoHY	7	HY	60012	Egfr-IR	4	8	262.02
Esg	1	HStoHY	7	HY	60012	Egfr-IR	4	8	560.532
Esg	1	HStoHY	7	HY	60012	Egfr-IR	4	8	484.758
Esg	1	HStoHY	7	HY	60012	Egfr-IR	4	8	523.642
Esg	1	HStoHY	7	HY	60012	Egfr-IR	4	8	499.115
Esg	1	HStoHY	7	HY	60012	Egfr-IR	4	8	484.558
Esg	1	HStoHY	7	HY	60012	Egfr-IR	4	8	310.077
Esg	1	HStoHY	7	HY	60012	Egfr-IR	4	8	491.338
Esg	1	HStoHY	7	HY	60012	Egfr-IR	4	9	295.92
Esg	1	HStoHY	7	HY	60012	Egfr-IR	4	9	219.547
Esg	1	HStoHY	7	HY	60012	Egfr-IR	4	9	469.603
Esg	1	HStoHY	7	HY	60012	Egfr-IR	4	9	175.877
Esg	1	HStoHY	7	HY	60012	Egfr-IR	4	9	280.366
Esg	1	HStoHY	7	HY	60012	Egfr-IR	4	9	189.636
Esg	1	HStoHY	7	HY	60012	Egfr-IR	4	9	194.82
Esg	1	HStoHY	7	HY	60012	Egfr-IR	4	9	328.622
Esg	1	HStoHY	7	HY	60012	Egfr-IR	4	9	348.563
Esg	1	HStoHY	7	HY	60012	Egfr-IR	4	9	318.652
Esg	1	HStoHY	7	HY	60012	Egfr-IR	4	9	420.948
Esg	1	HStoHY	7	HY	60012	Egfr-IR	4	9	349.161
Esg	1	HStoHY	7	HY	60012	Egfr-IR	4	9	276.577
Esg	1	HStoHY	7	HY	60012	Egfr-IR	4	9	237.493
Esg	1	HStoHY	7	HY	60012	Egfr-IR	4	9	362.92
Esg	1	HStoHY	7	HY	60012	Egfr-IR	4	9	302.5
Esg	1	HStoHY	7	HY	60012	Egfr-IR	4	9	412.174
Esg	1	HStoHY	7	HY	60012	Egfr-IR	4	9	335.203
Esg	1	HStoHY	7	HY	60012	Egfr-IR	4	9	265.211
Esg	1	HStoHY	7	HY	60012	Egfr-IR	4	9	184.651
Esg	1	HStoHY	7	HY	60012	Egfr-IR	4	9	456.243
Esg	1	HStoHY	7	HY	60012	Egfr-IR	4	9	248.261
Esg	1	HStoHY	7	HY	60012	Egfr-IR	4	9	253.446
Esg	1	HStoHY	7	HY	60012	Egfr-IR	4	9	370.498
Esg	1	HStoHY	7	HY	60012	Egfr-IR	4	9	428.326
Esg	1	HStoHY	7	HY	60012	Egfr-IR	4	10	332.212
Esg	1	HStoHY	7	HY	60012	Egfr-IR	4	10	375.882
Esg	1	HStoHY	7	HY	60012	Egfr-IR	4	10	270.994
Esg	1	HStoHY	7	HY	60012	Egfr-IR	4	10	211.172
Esg	1	HStoHY	7	HY	60012	Egfr-IR	4	10	551.36
Esg	1	HStoHY	7	HY	60012	Egfr-IR	4	10	153.543
Esg	1	HStoHY	7	HY	60012	Egfr-IR	4	10	620.753
Esg	1	HStoHY	7	HY	60012	Egfr-IR	4	10	187.243
Esg	1	HStoHY	7	HY	60012	Egfr-IR	4	10	376.879
Esg	1	HStoHY	7	HY	60012	Egfr-IR	4	10	249.059
Esg	1	HStoHY	7	HY	60012	Egfr-IR	4	10	459.234
Esg	1	HStoHY	7	HY	60012	Egfr-IR	4	10	405.394
Esg	1	HStoHY	7	HY	60012	Egfr-IR	4	10	259.229
Esg	1	HStoHY	7	HY	60012	Egfr-IR	4	10	235.3
Esg	1	HStoHY	7	HY	60012	Egfr-IR	4	10	121.239
Esg	1	HStoHY	7	HY	60012	Egfr-IR	4	10	247.863
Esg	1	HStoHY	7	HY	60012	Egfr-IR	4	10	475.186
Esg	1	HStoHY	7	HY	60012	Egfr-IR	4	10	469.802
Esg	1	HStoHY	7	HY	60012	Egfr-IR	4	10	227.124
Esg	1	HStoHY	7	HY	60012	Egfr-IR	4	10	452.653
Esg	1	HStoHY	7	HY	60012	Egfr-IR	4	10	269.199
Esg	1	HStoHY	7	HY	60012	Egfr-IR	4	10	208.181
Esg	1	HStoHY	7	HY	60012	Egfr-IR	4	10	334.804
Esg	1	HStoHY	7	HY	60012	Egfr-IR	4	10	402.802
Esg	1	HStoHY	7	HY	60012	Egfr-IR	4	10	219.148
Esg	1	HStoHY	7	HY	60012	Egfr-IR	4	10	224.931
Esg	1	HS	0	HS	Cs	Control	4	1	166.106
Esg	1	HS	0	HS	Cs	Control	4	1	65.804
Esg	1	HS	0	HS	Cs	Control	4	1	75.376
Esg	1	HS	0	HS	Cs	Control	4	1	107.281
Esg	1	HS	0	HS	Cs	Control	4	1	142.177
Esg	1	HS	0	HS	Cs	Control	4	1	86.742
Esg	1	HS	0	HS	Cs	Control	4	1	193.823
Esg	1	HS	0	HS	Cs	Control	4	1	129.415
Esg	1	HS	0	HS	Cs	Control	4	1	250.255
Esg	1	HS	0	HS	Cs	Control	4	1	48.655
Esg	1	HS	0	HS	Cs	Control	4	1	85.147
Esg	1	HS	0	HS	Cs	Control	4	1	96.513
Esg	1	HS	0	HS	Cs	Control	4	1	142.376
Esg	1	HS	0	HS	Cs	Control	4	1	102.894
Esg	1	HS	0	HS	Cs	Control	4	1	82.554
Esg	1	HS	0	HS	Cs	Control	4	1	82.554
Esg	1	HS	0	HS	Cs	Control	4	1	72.584
Esg	1	HS	0	HS	Cs	Control	4	2	77.37
Esg	1	HS	0	HS	Cs	Control	4	2	138.588
Esg	1	HS	0	HS	Cs	Control	4	2	136.793
Esg	1	HS	0	HS	Cs	Control	4	2	89.932
Esg	1	HS	0	HS	Cs	Control	4	2	114.459
Esg	1	HS	0	HS	Cs	Control	4	2	88.935
Esg	1	HS	0	HS	Cs	Control	4	2	148.359
Esg	1	HS	0	HS	Cs	Control	4	2	90.929
Esg	1	HS	0	HS	Cs	Control	4	2	85.745
Esg	1	HS	0	HS	Cs	Control	4	2	97.111
Esg	1	HS	0	HS	Cs	Control	4	2	104.888
Esg	1	HS	0	HS	Cs	Control	4	2	121.04
Esg	1	HS	0	HS	Cs	Control	4	2	120.84
Esg	1	HS	0	HS	Cs	Control	4	2	125.028
Esg	1	HS	0	HS	Cs	Control	4	2	75.176
Esg	1	HS	0	HS	Cs	Control	4	2	87.54
Esg	1	HS	0	HS	Cs	Control	4	2	60.62
Esg	1	HS	0	HS	Cs	Control	4	3	69.593
Esg	1	HS	0	HS	Cs	Control	4	3	72.584
Esg	1	HS	0	HS	Cs	Control	4	3	50.45
Esg	1	HS	0	HS	Cs	Control	4	3	77.569
Esg	1	HS	0	HS	Cs	Control	4	3	76.173
Esg	1	HS	0	HS	Cs	Control	4	3	164.71
Esg	1	HS	0	HS	Cs	Control	4	3	207.981
Esg	1	HS	0	HS	Cs	Control	4	3	94.918
Esg	1	HS	0	HS	Cs	Control	4	3	112.067
Esg	1	HS	0	HS	Cs	Control	4	3	55.036
Esg	1	HS	0	HS	Cs	Control	4	3	142.576
Esg	1	HS	0	HS	Cs	Control	4	3	71.986
Esg	1	HS	0	HS	Cs	Control	4	3	78.367
Esg	1	HS	0	HS	Cs	Control	4	4	180.264
Esg	1	HS	0	HS	Cs	Control	4	4	159.127
Esg	1	HS	0	HS	Cs	Control	4	4	193.624
Esg	1	HS	0	HS	Cs	Control	4	4	154.141
Esg	1	HS	0	HS	Cs	Control	4	4	193.624
Esg	1	HS	0	HS	Cs	Control	4	4	223.934
Esg	1	HS	0	HS	Cs	Control	4	4	167.502
Esg	1	HS	0	HS	Cs	Control	4	4	111.468
Esg	1	HS	0	HS	Cs	Control	4	4	173.085
Esg	1	HS	0	HS	Cs	Control	4	4	166.505
Esg	1	HS	0	HS	Cs	Control	4	4	132.605
Esg	1	HS	0	HS	Cs	Control	4	4	137.989
Esg	1	HS	0	HS	Cs	Control	4	4	164.511
Esg	1	HS	0	HS	Cs	Control	4	4	224.532
Esg	1	HS	0	HS	Cs	Control	4	4	154.54
Esg	1	HS	0	HS	Cs	Control	4	4	158.13
Esg	1	HS	0	HS	Cs	Control	4	4	143.373
Esg	1	HS	0	HS	Cs	Control	4	4	228.321
Esg	1	HS	0	HS	Cs	Control	4	4	159.326
Esg	1	HS	0	HS	Cs	Control	4	4	135.597
Esg	1	HS	0	HS	Cs	Control	4	4	152.147
Esg	1	HS	0	HS	Cs	Control	4	4	160.124
Esg	1	HS	0	HS	Cs	Control	4	4	229.916
Esg	1	HS	0	HS	Cs	Control	4	5	147.76
Esg	1	HS	0	HS	Cs	Control	4	5	128.219
Esg	1	HS	0	HS	Cs	Control	4	5	66.004
Esg	1	HS	0	HS	Cs	Control	4	5	93.322
Esg	1	HS	0	HS	Cs	Control	4	5	89.932
Esg	1	HS	0	HS	Cs	Control	4	5	78.766
Esg	1	HS	0	HS	Cs	Control	4	5	124.43
Esg	1	HS	0	HS	Cs	Control	4	5	118.049
Esg	1	HS	0	HS	Cs	Control	4	5	140.382
Esg	1	HS	0	HS	Cs	Control	4	5	85.545
Esg	1	HS	0	HS	Cs	Control	4	5	82.754
Esg	1	HS	0	HS	Cs	Control	4	5	123.233
Esg	1	HS	0	HS	Cs	Control	4	5	73.581
Esg	1	HS	0	HS	Cs	Control	4	5	183.255
Esg	1	HS	0	HS	Cs	Control	4	5	44.468
Esg	1	HS	0	HS	Cs	Control	4	5	84.947
Esg	1	HS	0	HS	Cs	Control	4	5	116.055
Esg	1	HS	0	HS	Cs	Control	4	5	93.522
Esg	1	HS	0	HS	Cs	Control	4	5	137.192
Esg	1	HS	0	HS	Cs	Control	4	5	96.513
Esg	1	HS	0	HS	Cs	Control	4	6	133.204
Esg	1	HS	0	HS	Cs	Control	4	6	92.126
Esg	1	HS	0	HS	Cs	Control	4	6	103.093
Esg	1	HS	0	HS	Cs	Control	4	6	127.62
Esg	1	HS	0	HS	Cs	Control	4	6	120.242
Esg	1	HS	0	HS	Cs	Control	4	6	117.251
Esg	1	HS	0	HS	Cs	Control	4	6	142.775
Esg	1	HS	0	HS	Cs	Control	4	6	116.254
Esg	1	HS	0	HS	Cs	Control	4	6	118.049
Esg	1	HS	0	HS	Cs	Control	4	6	135.198
Esg	1	HS	0	HS	Cs	Control	4	6	121.04
Esg	1	HS	0	HS	Cs	Control	4	6	122.635
Esg	1	HS	0	HS	Cs	Control	4	6	156.335
Esg	1	HS	0	HS	Cs	Control	4	6	164.311
Esg	1	HS	0	HS	Cs	Control	4	6	106.084
Esg	1	HS	0	HS	Cs	Control	4	6	120.242
Esg	1	HS	0	HS	Cs	Control	4	6	135.796
Esg	1	HS	0	HS	Cs	Control	4	6	159.924
Esg	1	HS	0	HS	Cs	Control	4	6	174.481
Esg	1	HS	0	HS	Cs	Control	4	6	136.195
Esg	1	HS	0	HS	Cs	Control	4	7	250.255
Esg	1	HS	0	HS	Cs	Control	4	7	184.651
Esg	1	HS	0	HS	Cs	Control	4	7	143.373
Esg	1	HS	0	HS	Cs	Control	4	7	104.689
Esg	1	HS	0	HS	Cs	Control	4	7	150.751
Esg	1	HS	0	HS	Cs	Control	4	7	203.195
Esg	1	HS	0	HS	Cs	Control	4	7	119.046
Esg	1	HS	0	HS	Cs	Control	4	7	112.266
Esg	1	HS	0	HS	Cs	Control	4	7	112.665
Esg	1	HS	0	HS	Cs	Control	4	7	170.493
Esg	1	HS	0	HS	Cs	Control	4	7	137.989
Esg	1	HS	0	HS	Cs	Control	4	7	233.705
Esg	1	HS	0	HS	Cs	Control	4	7	169.097
Esg	1	HS	0	HS	Cs	Control	4	7	132.406
Esg	1	HS	0	HS	Cs	Control	4	7	119.046
Esg	1	HS	0	HS	Cs	Control	4	7	119.644
Esg	1	HS	0	HS	Cs	Control	4	7	117.65
Esg	1	HS	0	HS	Cs	Control	4	7	141.978
Esg	1	HS	0	HS	Cs	Control	4	7	101.099
Esg	1	HS	0	HS	Cs	Control	4	7	77.769
Esg	1	HS	0	HS	Cs	Control	4	8	118.049
Esg	1	HS	0	HS	Cs	Control	4	8	101.897
Esg	1	HS	0	HS	Cs	Control	4	8	105.287
Esg	1	HS	0	HS	Cs	Control	4	8	69.194
Esg	1	HS	0	HS	Cs	Control	4	8	86.343
Esg	1	HS	0	HS	Cs	Control	4	8	159.127
Esg	1	HS	0	HS	Cs	Control	4	8	83.352
Esg	1	HS	0	HS	Cs	Control	4	8	97.709
Esg	1	HS	0	HS	Cs	Control	4	8	86.543
Esg	1	HS	0	HS	Cs	Control	4	8	106.882
Esg	1	HS	0	HS	Cs	Control	4	8	138.388
Esg	1	HS	0	HS	Cs	Control	4	8	93.123
Esg	1	HS	0	HS	Cs	Control	4	8	95.715
Esg	1	HS	0	HS	Cs	Control	4	8	82.953
Esg	1	HS	0	HS	Cs	Control	4	8	133.802
Esg	1	HS	0	HS	Cs	Control	4	8	80.959
Esg	1	HS	0	HS	Cs	Control	4	8	92.126
Esg	1	HS	0	HS	Cs	Control	4	8	69.792
Esg	1	HS	0	HS	Cs	Control	4	8	87.54
Esg	1	HS	0	HS	Cs	Control	4	8	86.543
Esg	1	HS	0	HS	Cs	Control	4	9	136.594
Esg	1	HS	0	HS	Cs	Control	4	9	139.385
Esg	1	HS	0	HS	Cs	Control	4	9	101.897
Esg	1	HS	0	HS	Cs	Control	4	9	77.37
Esg	1	HS	0	HS	Cs	Control	4	9	66.801
Esg	1	HS	0	HS	Cs	Control	4	9	66.402
Esg	1	HS	0	HS	Cs	Control	4	9	77.17
Esg	1	HS	0	HS	Cs	Control	4	9	81.159
Esg	1	HS	0	HS	Cs	Control	4	9	84.15
Esg	1	HS	0	HS	Cs	Control	4	9	145.966
Esg	1	HS	0	HS	Cs	Control	4	9	81.956
Esg	1	HS	0	HS	Cs	Control	4	9	43.072
Esg	1	HS	0	HS	Cs	Control	4	9	21.137
Esg	1	HS	0	HS	Cs	Control	4	9	49.852
Esg	1	HS	0	HS	Cs	Control	4	9	56.432
Esg	1	HS	0	HS	Cs	Control	4	9	55.634
Esg	1	HS	0	HS	Cs	Control	4	9	77.769
Esg	1	HS	0	HS	Cs	Control	4	9	71.786
Esg	1	HS	0	HS	Cs	Control	4	9	73.382
Esg	1	HS	0	HS	Cs	Control	4	9	105.287
Esg	1	HS	0	HS	Cs	Control	4	9	71.786
Esg	1	HStoHY	7	HY	Cs	Control	4	1	198.011
Esg	1	HStoHY	7	HY	Cs	Control	4	1	162.716
Esg	1	HStoHY	7	HY	Cs	Control	4	1	380.269
Esg	1	HStoHY	7	HY	Cs	Control	4	1	289.539
Esg	1	HStoHY	7	HY	Cs	Control	4	1	217.353
Esg	1	HStoHY	7	HY	Cs	Control	4	1	172.487
Esg	1	HStoHY	7	HY	Cs	Control	4	1	136.594
Esg	1	HStoHY	7	HY	Cs	Control	4	1	294.524
Esg	1	HStoHY	7	HY	Cs	Control	4	1	291.931
Esg	1	HStoHY	7	HY	Cs	Control	4	1	177.472
Esg	1	HStoHY	7	HY	Cs	Control	4	1	183.255
Esg	1	HStoHY	7	HY	Cs	Control	4	1	233.904
Esg	1	HStoHY	7	HY	Cs	Control	4	1	220.943
Esg	1	HStoHY	7	HY	Cs	Control	4	1	268.401
Esg	1	HStoHY	7	HY	Cs	Control	4	1	139.585
Esg	1	HStoHY	7	HY	Cs	Control	4	1	211.77
Esg	1	HStoHY	7	HY	Cs	Control	4	1	332.012
Esg	1	HStoHY	7	HY	Cs	Control	4	1	349.959
Esg	1	HStoHY	7	HY	Cs	Control	4	1	242.279
Esg	1	HStoHY	7	HY	Cs	Control	4	1	285.949
Esg	1	HStoHY	7	HY	Cs	Control	4	1	213.166
Esg	1	HStoHY	7	HY	Cs	Control	4	1	258.431
Esg	1	HStoHY	7	HY	Cs	Control	4	1	180.064
Esg	1	HStoHY	7	HY	Cs	Control	4	1	266.806
Esg	1	HStoHY	7	HY	Cs	Control	4	1	165.308
Esg	1	HStoHY	7	HY	Cs	Control	4	1	194.422
Esg	1	HStoHY	7	HY	Cs	Control	4	2	464.219
Esg	1	HStoHY	7	HY	Cs	Control	4	2	417.358
Esg	1	HStoHY	7	HY	Cs	Control	4	2	481.567
Esg	1	HStoHY	7	HY	Cs	Control	4	2	264.015
Esg	1	HStoHY	7	HY	Cs	Control	4	2	269.199
Esg	1	HStoHY	7	HY	Cs	Control	4	2	269.398
Esg	1	HStoHY	7	HY	Cs	Control	4	2	283.357
Esg	1	HStoHY	7	HY	Cs	Control	4	2	238.291
Esg	1	HStoHY	7	HY	Cs	Control	4	2	363.518
Esg	1	HStoHY	7	HY	Cs	Control	4	2	330.616
Esg	1	HStoHY	7	HY	Cs	Control	4	2	439.293
Esg	1	HStoHY	7	HY	Cs	Control	4	2	322.839
Esg	1	HStoHY	7	HY	Cs	Control	4	2	344.575
Esg	1	HStoHY	7	HY	Cs	Control	4	2	363.12
Esg	1	HStoHY	7	HY	Cs	Control	4	2	382.263
Esg	1	HStoHY	7	HY	Cs	Control	4	2	275.78
Esg	1	HStoHY	7	HY	Cs	Control	4	2	235.499
Esg	1	HStoHY	7	HY	Cs	Control	4	2	189.038
Esg	1	HStoHY	7	HY	Cs	Control	4	2	298.911
Esg	1	HStoHY	7	HY	Cs	Control	4	2	361.524
Esg	1	HStoHY	7	HY	Cs	Control	4	2	137.391
Esg	1	HStoHY	7	HY	Cs	Control	4	2	131.01
Esg	1	HStoHY	7	HY	Cs	Control	4	2	135.995
Esg	1	HStoHY	7	HY	Cs	Control	4	2	310.875
Esg	1	HStoHY	7	HY	Cs	Control	4	2	439.094
Esg	1	HStoHY	7	HY	Cs	Control	4	3	305.89
Esg	1	HStoHY	7	HY	Cs	Control	4	3	606.595
Esg	1	HStoHY	7	HY	Cs	Control	4	4	328.822
Esg	1	HStoHY	7	HY	Cs	Control	4	4	337.197
Esg	1	HStoHY	7	HY	Cs	Control	4	4	722.451
Esg	1	HStoHY	7	HY	Cs	Control	4	4	409.382
Esg	1	HStoHY	7	HY	Cs	Control	4	4	423.34
Esg	1	HStoHY	7	HY	Cs	Control	4	4	322.241
Esg	1	HStoHY	7	HY	Cs	Control	4	4	267.205
Esg	1	HStoHY	7	HY	Cs	Control	4	4	326.429
Esg	1	HStoHY	7	HY	Cs	Control	4	4	263.416
Esg	1	HStoHY	7	HY	Cs	Control	4	4	301.104
Esg	1	HStoHY	7	HY	Cs	Control	4	4	446.671
Esg	1	HStoHY	7	HY	Cs	Control	4	4	420.748
Esg	1	HStoHY	7	HY	Cs	Control	4	4	289.14
Esg	1	HStoHY	7	HY	Cs	Control	4	4	288.94
Esg	1	HStoHY	7	HY	Cs	Control	4	4	491.737
Esg	1	HStoHY	7	HY	Cs	Control	4	4	428.724
Esg	1	HStoHY	7	HY	Cs	Control	4	4	418.754
Esg	1	HStoHY	7	HY	Cs	Control	4	4	637.703
Esg	1	HStoHY	7	HY	Cs	Control	4	4	416.361
Esg	1	HStoHY	7	HY	Cs	Control	4	4	294.723
Esg	1	HStoHY	7	HY	Cs	Control	4	4	233.306
Esg	1	HStoHY	7	HY	Cs	Control	4	4	413.57
Esg	1	HStoHY	7	HY	Cs	Control	4	4	300.307
Esg	1	HStoHY	7	HY	Cs	Control	4	4	353.947
Esg	1	HStoHY	7	HY	Cs	Control	4	4	295.521
Esg	1	HStoHY	7	HY	Cs	Control	4	4	279.369
Esg	1	HStoHY	7	HY	Cs	Control	4	4	275.979
Esg	1	HStoHY	7	HY	Cs	Control	4	4	351.554
Esg	1	HStoHY	7	HY	Cs	Control	4	4	375.283
Esg	1	HStoHY	7	HY	Cs	Control	4	4	257.434
Esg	1	HStoHY	7	HY	Cs	Control	4	5	421.147
Esg	1	HStoHY	7	HY	Cs	Control	4	5	270.994
Esg	1	HStoHY	7	HY	Cs	Control	4	5	285.152
Esg	1	HStoHY	7	HY	Cs	Control	4	5	375.483
Esg	1	HStoHY	7	HY	Cs	Control	4	5	342.98
Esg	1	HStoHY	7	HY	Cs	Control	4	5	505.695
Esg	1	HStoHY	7	HY	Cs	Control	4	5	618.759
Esg	1	HStoHY	7	HY	Cs	Control	4	5	406.59
Esg	1	HStoHY	7	HY	Cs	Control	4	5	481.767
Esg	1	HStoHY	7	HY	Cs	Control	4	5	434.707
Esg	1	HStoHY	7	HY	Cs	Control	4	5	552.556
Esg	1	HStoHY	7	HY	Cs	Control	4	5	378.075
Esg	1	HStoHY	7	HY	Cs	Control	4	5	521.847
Esg	1	HStoHY	7	HY	Cs	Control	4	5	529.225
Esg	1	HStoHY	7	HY	Cs	Control	4	5	381.266
Esg	1	HStoHY	7	HY	Cs	Control	4	5	300.107
Esg	1	HStoHY	7	HY	Cs	Control	4	5	586.455
Esg	1	HStoHY	7	HY	Cs	Control	4	5	309.479
Esg	1	HStoHY	7	HY	Cs	Control	4	5	304.494
Esg	1	HStoHY	7	HY	Cs	Control	4	5	408.385
Esg	1	HStoHY	7	HY	Cs	Control	4	6	253.446
Esg	1	HStoHY	7	HY	Cs	Control	4	6	491.338
Esg	1	HStoHY	7	HY	Cs	Control	4	6	294.923
Esg	1	HStoHY	7	HY	Cs	Control	4	6	223.136
Esg	1	HStoHY	7	HY	Cs	Control	4	6	437.1
Esg	1	HStoHY	7	HY	Cs	Control	4	6	325.432
Esg	1	HStoHY	7	HY	Cs	Control	4	6	252.848
Esg	1	HStoHY	7	HY	Cs	Control	4	6	229.717
Esg	1	HStoHY	7	HY	Cs	Control	4	6	448.665
Esg	1	HStoHY	7	HY	Cs	Control	4	6	264.812
Esg	1	HStoHY	7	HY	Cs	Control	4	6	293.926
Esg	1	HStoHY	7	HY	Cs	Control	4	6	219.746
Esg	1	HStoHY	7	HY	Cs	Control	4	6	136.195
Esg	1	HStoHY	7	HY	Cs	Control	4	6	271.393
Esg	1	HStoHY	7	HY	Cs	Control	4	6	254.443
Esg	1	HStoHY	7	HY	Cs	Control	4	6	240.883
Esg	1	HStoHY	7	HY	Cs	Control	4	6	125.626
Esg	1	HStoHY	7	HY	Cs	Control	4	6	116.454
Esg	1	HStoHY	7	HY	Cs	Control	4	6	217.752
Esg	1	HStoHY	7	HY	Cs	Control	4	6	301.503
Esg	1	HStoHY	7	HY	Cs	Control	4	6	172.487
Esg	1	HStoHY	7	HY	Cs	Control	4	6	62.614
Esg	1	HStoHY	7	HY	Cs	Control	4	6	290.536
Esg	1	HStoHY	7	HY	Cs	Control	4	6	140.382
Esg	1	HStoHY	7	HY	Cs	Control	4	6	203.594
Esg	1	HStoHY	7	HY	Cs	Control	4	7	539.794
Esg	1	HStoHY	7	HY	Cs	Control	4	7	405.793
Esg	1	HStoHY	7	HY	Cs	Control	4	7	608.589
Esg	1	HStoHY	7	HY	Cs	Control	4	7	251.851
Esg	1	HStoHY	7	HY	Cs	Control	4	7	289.14
Esg	1	HStoHY	7	HY	Cs	Control	4	7	221.142
Esg	1	HStoHY	7	HY	Cs	Control	4	7	375.283
Esg	1	HStoHY	7	HY	Cs	Control	4	7	430.32
Esg	1	HStoHY	7	HY	Cs	Control	4	7	454.249
Esg	1	HStoHY	7	HY	Cs	Control	4	7	202.996
Esg	1	HStoHY	7	HY	Cs	Control	4	7	204.791
Esg	1	HStoHY	7	HY	Cs	Control	4	7	530.422
Esg	1	HStoHY	7	HY	Cs	Control	4	7	567.91
Esg	1	HStoHY	7	HY	Cs	Control	4	7	276.178
Esg	1	HStoHY	7	HY	Cs	Control	4	7	254.642
Esg	1	HStoHY	7	HY	Cs	Control	4	7	425.733
Esg	1	HStoHY	7	HY	Cs	Control	4	8	228.72
Esg	1	HStoHY	7	HY	Cs	Control	4	8	178.07
Esg	1	HStoHY	7	HY	Cs	Control	4	8	96.513
Esg	1	HStoHY	7	HY	Cs	Control	4	8	316.857
Esg	1	HStoHY	7	HY	Cs	Control	4	8	146.963
Esg	1	HStoHY	7	HY	Cs	Control	4	8	246.267
Esg	1	HStoHY	7	HY	Cs	Control	4	8	235.699
Esg	1	HStoHY	7	HY	Cs	Control	4	8	151.549
Esg	1	HStoHY	7	HY	Cs	Control	4	8	211.77
Esg	1	HStoHY	7	HY	Cs	Control	4	8	200.404
Esg	1	HStoHY	7	HY	Cs	Control	4	8	208.779
Esg	1	HStoHY	7	HY	Cs	Control	4	8	125.227
Esg	1	HStoHY	7	HY	Cs	Control	4	8	152.347
Esg	1	HStoHY	7	HY	Cs	Control	4	8	334.206
Esg	1	HStoHY	7	HY	Cs	Control	4	8	125.028
Esg	1	HStoHY	7	HY	Cs	Control	4	8	120.242
Esg	1	HStoHY	7	HY	Cs	Control	4	8	216.356
Esg	1	HStoHY	7	HY	Cs	Control	4	8	197.811
Esg	1	HStoHY	7	HY	Cs	Control	4	8	386.65
Esg	1	HStoHY	7	HY	Cs	Control	4	8	298.911
Esg	1	HStoHY	7	HY	Cs	Control	4	8	176.276
Esg	1	HStoHY	7	HY	Cs	Control	4	8	180.862
Esg	1	HStoHY	7	HY	Cs	Control	4	8	195.419
Esg	1	HStoHY	7	HY	Cs	Control	4	8	123.034
Esg	1	HStoHY	7	HY	Cs	Control	4	8	373.688
Esg	1	HStoHY	7	HY	Cs	Control	4	8	183.654
Esg	1	HStoHY	7	HY	Cs	Control	4	8	214.562
Esg	1	HStoHY	7	HY	Cs	Control	4	8	225.928
Esg	1	HStoHY	7	HY	Cs	Control	4	8	160.722
Esg	1	HStoHY	7	HY	Cs	Control	4	8	314.066
Esg	1	HStoHY	7	HY	Cs	Control	4	9	413.968
Esg	1	HStoHY	7	HY	Cs	Control	4	9	294.524
Esg	1	HStoHY	7	HY	Cs	Control	4	9	253.446
Esg	1	HStoHY	7	HY	Cs	Control	4	9	176.276
Esg	1	HStoHY	7	HY	Cs	Control	4	9	348.762
Esg	1	HStoHY	7	HY	Cs	Control	4	9	528.228
Esg	1	HStoHY	7	HY	Cs	Control	4	9	415.962
Esg	1	HStoHY	7	HY	Cs	Control	4	9	386.45
Esg	1	HStoHY	7	HY	Cs	Control	4	9	399.212
Esg	1	HStoHY	7	HY	Cs	Control	4	9	233.106
Esg	1	HStoHY	7	HY	Cs	Control	4	9	245.669
Esg	1	HStoHY	7	HY	Cs	Control	4	9	265.809
Esg	1	HStoHY	7	HY	Cs	Control	4	9	289.339
Esg	1	HStoHY	7	HY	Cs	Control	4	9	354.146
Esg	1	HStoHY	7	HY	Cs	Control	4	9	329.619
Esg	1	HStoHY	7	HY	Cs	Control	4	9	309.878
Esg	1	HStoHY	7	HY	Cs	Control	4	9	339.59
Esg	1	HStoHY	7	HY	Cs	Control	4	9	364.117
Esg	1	HStoHY	7	HY	Cs	Control	4	9	220.544
Esg	1	HStoHY	7	HY	Cs	Control	4	9	174.68
Esg	1	HStoHY	7	HY	Cs	Control	4	9	238.092
Esg	1	HStoHY	7	HY	Cs	Control	4	9	309.28
Esg	1	HStoHY	7	HY	Cs	Control	4	9	188.439
Esg	1	HStoHY	7	HY	Cs	Control	4	9	527.83
Esg	1	HStoHY	7	HY	Cs	Control	4	9	516.663
Esg	1	HStoHY	7	HY	Cs	Control	4	9	204.99
Esg	1	HStoHY	7	HY	Cs	Control	4	9	299.509
Esg	1	HStoHY	7	HY	Cs	Control	4	9	573.494
Esg	1	HStoHY	7	HY	Cs	Control	4	9	288.94
Esg	1	HStoHY	7	HY	Cs	Control	4	9	350.557
Esg	2	HStoHY	7	HY	60012	Egfr-IR	4	1	711.882
Esg	2	HStoHY	7	HY	60012	Egfr-IR	4	1	541.19
Esg	2	HStoHY	7	HY	60012	Egfr-IR	4	1	457.638
Esg	2	HStoHY	7	HY	60012	Egfr-IR	4	1	542.985
Esg	2	HStoHY	7	HY	60012	Egfr-IR	4	1	1296.941
Esg	2	HStoHY	7	HY	60012	Egfr-IR	4	1	643.286
Esg	2	HStoHY	7	HY	60012	Egfr-IR	4	1	331.613
Esg	2	HStoHY	7	HY	60012	Egfr-IR	4	1	201.401
Esg	2	HStoHY	7	HY	60012	Egfr-IR	4	1	338.593
Esg	2	HStoHY	7	HY	60012	Egfr-IR	4	1	334.206
Esg	2	HStoHY	7	HY	60012	Egfr-IR	4	1	876.193
Esg	2	HStoHY	7	HY	60012	Egfr-IR	4	1	312.869
Esg	2	HStoHY	7	HY	60012	Egfr-IR	4	1	232.708
Esg	2	HStoHY	7	HY	60012	Egfr-IR	4	1	217.952
Esg	2	HStoHY	7	HY	60012	Egfr-IR	4	1	288.143
Esg	2	HStoHY	7	HY	60012	Egfr-IR	4	1	407.587
Esg	2	HStoHY	7	HY	60012	Egfr-IR	4	1	228.321
Esg	2	HStoHY	7	HY	60012	Egfr-IR	4	1	363.518
Esg	2	HStoHY	7	HY	60012	Egfr-IR	4	1	449.064
Esg	2	HStoHY	7	HY	60012	Egfr-IR	4	1	307.884
Esg	2	HStoHY	7	HY	60012	Egfr-IR	4	1	451.457
Esg	2	HStoHY	7	HY	60012	Egfr-IR	4	1	300.107
Esg	2	HStoHY	7	HY	60012	Egfr-IR	4	1	184.451
Esg	2	HStoHY	7	HY	60012	Egfr-IR	4	1	791.445
Esg	2	HStoHY	7	HY	60012	Egfr-IR	4	1	227.523
Esg	2	HStoHY	7	HY	60012	Egfr-IR	4	1	394.825
Esg	2	HStoHY	7	HY	60012	Egfr-IR	4	1	217.952
Esg	2	HStoHY	7	HY	60012	Egfr-IR	4	1	209.377
Esg	2	HStoHY	7	HY	60012	Egfr-IR	4	1	340.387
Esg	2	HStoHY	7	HY	60012	Egfr-IR	4	1	438.695
Esg	2	HStoHY	7	HY	60012	Egfr-IR	4	2	609.387
Esg	2	HStoHY	7	HY	60012	Egfr-IR	4	2	576.485
Esg	2	HStoHY	7	HY	60012	Egfr-IR	4	2	689.548
Esg	2	HStoHY	7	HY	60012	Egfr-IR	4	2	727.635
Esg	2	HStoHY	7	HY	60012	Egfr-IR	4	2	587.652
Esg	2	HStoHY	7	HY	60012	Egfr-IR	4	2	553.952
Esg	2	HStoHY	7	HY	60012	Egfr-IR	4	2	319.051
Esg	2	HStoHY	7	HY	60012	Egfr-IR	4	2	677.385
Esg	2	HStoHY	7	HY	60012	Egfr-IR	4	2	585.857
Esg	2	HStoHY	7	HY	60012	Egfr-IR	4	2	610.583
Esg	2	HStoHY	7	HY	60012	Egfr-IR	4	2	662.429
Esg	2	HStoHY	7	HY	60012	Egfr-IR	4	2	637.902
Esg	2	HStoHY	7	HY	60012	Egfr-IR	4	2	546.574
Esg	2	HStoHY	7	HY	60012	Egfr-IR	4	2	526.234
Esg	2	HStoHY	7	HY	60012	Egfr-IR	4	2	335.203
Esg	2	HStoHY	7	HY	60012	Egfr-IR	4	2	310.077
Esg	2	HStoHY	7	HY	60012	Egfr-IR	4	2	314.664
Esg	2	HStoHY	7	HY	60012	Egfr-IR	4	2	430.519
Esg	2	HStoHY	7	HY	60012	Egfr-IR	4	2	276.178
Esg	2	HStoHY	7	HY	60012	Egfr-IR	4	2	341.584
Esg	2	HStoHY	7	HY	60012	Egfr-IR	4	2	607.592
Esg	2	HStoHY	7	HY	60012	Egfr-IR	4	2	645.081
Esg	2	HStoHY	7	HY	60012	Egfr-IR	4	2	416.162
Esg	2	HStoHY	7	HY	60012	Egfr-IR	4	2	521.05
Esg	2	HStoHY	7	HY	60012	Egfr-IR	4	2	687.156
Esg	2	HStoHY	7	HY	60012	Egfr-IR	4	2	523.443
Esg	2	HStoHY	7	HY	60012	Egfr-IR	4	2	460.231
Esg	2	HStoHY	7	HY	60012	Egfr-IR	4	2	587.851
Esg	2	HStoHY	7	HY	60012	Egfr-IR	4	2	630.723
Esg	2	HStoHY	7	HY	60012	Egfr-IR	4	2	844.089
Esg	2	HStoHY	7	HY	60012	Egfr-IR	4	2	375.682
Esg	2	HStoHY	7	HY	60012	Egfr-IR	4	2	568.708
Esg	2	HStoHY	7	HY	60012	Egfr-IR	4	2	291.533
Esg	2	HStoHY	7	HY	60012	Egfr-IR	4	2	266.607
Esg	2	HStoHY	7	HY	60012	Egfr-IR	4	2	401.605
Esg	2	HStoHY	7	HY	60012	Egfr-IR	4	2	458.436
Esg	2	HStoHY	7	HY	60012	Egfr-IR	4	2	473.192
Esg	2	HStoHY	7	HY	60012	Egfr-IR	4	2	615.569
Esg	2	HStoHY	7	HY	60012	Egfr-IR	4	3	647.673
Esg	2	HStoHY	7	HY	60012	Egfr-IR	4	3	384.855
Esg	2	HStoHY	7	HY	60012	Egfr-IR	4	3	539.395
Esg	2	HStoHY	7	HY	60012	Egfr-IR	4	3	491.538
Esg	2	HStoHY	7	HY	60012	Egfr-IR	4	3	412.971
Esg	2	HStoHY	7	HY	60012	Egfr-IR	4	3	459.832
Esg	2	HStoHY	7	HY	60012	Egfr-IR	4	3	582.268
Esg	2	HStoHY	7	HY	60012	Egfr-IR	4	3	438.495
Esg	2	HStoHY	7	HY	60012	Egfr-IR	4	3	355.941
Esg	2	HStoHY	7	HY	60012	Egfr-IR	4	3	332.61
Esg	2	HStoHY	7	HY	60012	Egfr-IR	4	3	291.333
Esg	2	HStoHY	7	HY	60012	Egfr-IR	4	3	246.267
Esg	2	HStoHY	7	HY	60012	Egfr-IR	4	3	339.988
Esg	2	HStoHY	7	HY	60012	Egfr-IR	4	3	349.959
Esg	2	HStoHY	7	HY	60012	Egfr-IR	4	3	312.072
Esg	2	HStoHY	7	HY	60012	Egfr-IR	4	3	305.092
Esg	2	HStoHY	7	HY	60012	Egfr-IR	4	3	224.731
Esg	2	HStoHY	7	HY	60012	Egfr-IR	4	3	323.837
Esg	2	HStoHY	7	HY	60012	Egfr-IR	4	3	344.176
Esg	2	HStoHY	7	HY	60012	Egfr-IR	4	3	374.486
Esg	2	HStoHY	7	HY	60012	Egfr-IR	4	3	505.895
Esg	2	HStoHY	7	HY	60012	Egfr-IR	4	3	189.835
Esg	2	HStoHY	7	HY	60012	Egfr-IR	4	3	305.292
Esg	2	HStoHY	7	HY	60012	Egfr-IR	4	3	419.951
Esg	2	HStoHY	7	HY	60012	Egfr-IR	4	3	417.957
Esg	2	HStoHY	7	HY	60012	Egfr-IR	4	3	291.533
Esg	2	HStoHY	7	HY	60012	Egfr-IR	4	3	212.169
Esg	2	HStoHY	7	HY	60012	Egfr-IR	4	3	317.456
Esg	2	HStoHY	7	HY	60012	Egfr-IR	4	3	321.643
Esg	2	HStoHY	7	HY	60012	Egfr-IR	4	3	267.404
Esg	2	HStoHY	7	HY	60012	Egfr-IR	4	3	233.505
Esg	2	HStoHY	7	HY	60012	Egfr-IR	4	3	182.657
Esg	2	HStoHY	7	HY	60012	Egfr-IR	4	3	208.579
Esg	2	HStoHY	7	HY	60012	Egfr-IR	4	4	620.753
Esg	2	HStoHY	7	HY	60012	Egfr-IR	4	4	566.714
Esg	2	HStoHY	7	HY	60012	Egfr-IR	4	4	575.089
Esg	2	HStoHY	7	HY	60012	Egfr-IR	4	4	335.003
Esg	2	HStoHY	7	HY	60012	Egfr-IR	4	4	320.048
Esg	2	HStoHY	7	HY	60012	Egfr-IR	4	4	656.846
Esg	2	HStoHY	7	HY	60012	Egfr-IR	4	4	437.698
Esg	2	HStoHY	7	HY	60012	Egfr-IR	4	4	194.422
Esg	2	HStoHY	7	HY	60012	Egfr-IR	4	4	338.593
Esg	2	HStoHY	7	HY	60012	Egfr-IR	4	4	476.781
Esg	2	HStoHY	7	HY	60012	Egfr-IR	4	4	312.67
Esg	2	HStoHY	7	HY	60012	Egfr-IR	4	4	175.279
Esg	2	HStoHY	7	HY	60012	Egfr-IR	4	4	292.729
Esg	2	HStoHY	7	HY	60012	Egfr-IR	4	4	487.151
Esg	2	HStoHY	7	HY	60012	Egfr-IR	4	4	256.636
Esg	2	HStoHY	7	HY	60012	Egfr-IR	4	4	429.921
Esg	2	HStoHY	7	HY	60012	Egfr-IR	4	4	448.665
Esg	2	HStoHY	7	HY	60012	Egfr-IR	4	4	332.81
Esg	2	HStoHY	7	HY	60012	Egfr-IR	4	4	495.925
Esg	2	HStoHY	7	HY	60012	Egfr-IR	4	4	390.638
Esg	2	HStoHY	7	HY	60012	Egfr-IR	4	4	624.342
Esg	2	HStoHY	7	HY	60012	Egfr-IR	4	4	324.435
Esg	2	HStoHY	7	HY	60012	Egfr-IR	4	4	323.438
Esg	2	HStoHY	7	HY	60012	Egfr-IR	4	4	522.446
Esg	2	HStoHY	7	HY	60012	Egfr-IR	4	4	498.716
Esg	2	HStoHY	7	HY	60012	Egfr-IR	4	4	336.399
Esg	2	HStoHY	7	HY	60012	Egfr-IR	4	4	463.82
Esg	2	HStoHY	7	HY	60012	Egfr-IR	4	4	294.723
Esg	2	HStoHY	7	HY	60012	Egfr-IR	4	4	226.526
Esg	2	HStoHY	7	HY	60012	Egfr-IR	4	4	146.365
Esg	2	HStoHY	7	HY	60012	Egfr-IR	4	4	406.989
Esg	2	HStoHY	7	HY	60012	Egfr-IR	4	4	182.457
Esg	2	HStoHY	7	HY	60012	Egfr-IR	4	4	389.441
Esg	2	HStoHY	7	HY	60012	Egfr-IR	4	4	287.943
Esg	2	HStoHY	7	HY	60012	Egfr-IR	4	4	291.533
Esg	2	HStoHY	7	HY	60012	Egfr-IR	4	4	514.669
Esg	2	HStoHY	7	HY	60012	Egfr-IR	4	4	527.032
Esg	2	HStoHY	7	HY	60012	Egfr-IR	4	4	695.73
Esg	2	HStoHY	7	HY	60012	Egfr-IR	4	4	736.808
Esg	2	HStoHY	7	HY	60012	Egfr-IR	4	4	692.739
Esg	2	HStoHY	7	HY	60012	Egfr-IR	4	4	477.978
Esg	2	HStoHY	7	HY	60012	Egfr-IR	4	4	717.665
Esg	2	HStoHY	7	HY	60012	Egfr-IR	4	5	681.772
Esg	2	HStoHY	7	HY	60012	Egfr-IR	4	5	831.327
Esg	2	HStoHY	7	HY	60012	Egfr-IR	4	5	580.473
Esg	2	HStoHY	7	HY	60012	Egfr-IR	4	5	708.891
Esg	2	HStoHY	7	HY	60012	Egfr-IR	4	5	548.967
Esg	2	HStoHY	7	HY	60012	Egfr-IR	4	5	788.454
Esg	2	HStoHY	7	HY	60012	Egfr-IR	4	5	754.954
Esg	2	HStoHY	7	HY	60012	Egfr-IR	4	5	668.81
Esg	2	HStoHY	7	HY	60012	Egfr-IR	4	5	530.023
Esg	2	HStoHY	7	HY	60012	Egfr-IR	4	5	733.817
Esg	2	HStoHY	7	HY	60012	Egfr-IR	4	5	554.55
Esg	2	HStoHY	7	HY	60012	Egfr-IR	4	5	770.109
Esg	2	HStoHY	7	HY	60012	Egfr-IR	4	5	588.449
Esg	2	HStoHY	7	HY	60012	Egfr-IR	4	5	536.803
Esg	2	HStoHY	7	HY	60012	Egfr-IR	4	5	588.25
Esg	2	HStoHY	7	HY	60012	Egfr-IR	4	5	601.411
Esg	2	HStoHY	7	HY	60012	Egfr-IR	4	5	674.394
Esg	2	HStoHY	7	HY	60012	Egfr-IR	4	5	766.918
Esg	2	HStoHY	7	HY	60012	Egfr-IR	4	5	383.06
Esg	2	HStoHY	7	HY	60012	Egfr-IR	4	5	328.622
Esg	2	HStoHY	7	HY	60012	Egfr-IR	4	5	461.427
Esg	2	HStoHY	7	HY	60012	Egfr-IR	4	5	803.41
Esg	2	HStoHY	7	HY	60012	Egfr-IR	4	5	726.838
Esg	2	HStoHY	7	HY	60012	Egfr-IR	4	5	493.93
Esg	2	HStoHY	7	HY	60012	Egfr-IR	4	5	1464.244
Esg	2	HStoHY	7	HY	60012	Egfr-IR	4	5	1355.368
Esg	2	HStoHY	7	HY	60012	Egfr-IR	4	5	732.82
Esg	2	HStoHY	7	HY	60012	Egfr-IR	4	5	1051.671
Esg	2	HStoHY	7	HY	60012	Egfr-IR	4	5	1022.358
Esg	2	HStoHY	7	HY	60012	Egfr-IR	4	5	847.678
Esg	2	HStoHY	7	HY	60012	Egfr-IR	4	5	776.091
Esg	2	HStoHY	7	HY	60012	Egfr-IR	4	6	884.568
Esg	2	HStoHY	7	HY	60012	Egfr-IR	4	6	533.413
Esg	2	HStoHY	7	HY	60012	Egfr-IR	4	6	523.243
Esg	2	HStoHY	7	HY	60012	Egfr-IR	4	6	590.842
Esg	2	HStoHY	7	HY	60012	Egfr-IR	4	6	727.436
Esg	2	HStoHY	7	HY	60012	Egfr-IR	4	6	550.761
Esg	2	HStoHY	7	HY	60012	Egfr-IR	4	6	474.787
Esg	2	HStoHY	7	HY	60012	Egfr-IR	4	6	535.407
Esg	2	HStoHY	7	HY	60012	Egfr-IR	4	6	469.005
Esg	2	HStoHY	7	HY	60012	Egfr-IR	4	6	500.311
Esg	2	HStoHY	7	HY	60012	Egfr-IR	4	6	481.368
Esg	2	HStoHY	7	HY	60012	Egfr-IR	4	6	336.997
Esg	2	HStoHY	7	HY	60012	Egfr-IR	4	6	305.292
Esg	2	HStoHY	7	HY	60012	Egfr-IR	4	6	669.408
Esg	2	HStoHY	7	HY	60012	Egfr-IR	4	6	604.202
Esg	2	HStoHY	7	HY	60012	Egfr-IR	4	6	300.107
Esg	2	HStoHY	7	HY	60012	Egfr-IR	4	6	431.117
Esg	2	HStoHY	7	HY	60012	Egfr-IR	4	6	418.355
Esg	2	HStoHY	7	HY	60012	Egfr-IR	4	6	918.268
Esg	2	HStoHY	7	HY	60012	Egfr-IR	4	6	593.036
Esg	2	HStoHY	7	HY	60012	Egfr-IR	4	6	296.318
Esg	2	HStoHY	7	HY	60012	Egfr-IR	4	6	415.364
Esg	2	HStoHY	7	HY	60012	Egfr-IR	4	6	398.813
Esg	2	HStoHY	7	HY	60012	Egfr-IR	4	6	741.992
Esg	2	HStoHY	7	HY	60012	Egfr-IR	4	6	583.663
Esg	2	HStoHY	7	HY	60012	Egfr-IR	4	6	573.494
Esg	2	HStoHY	7	HY	60012	Egfr-IR	4	6	535.008
Esg	2	HStoHY	7	HY	60012	Egfr-IR	4	6	289.14
Esg	2	HStoHY	7	HY	60012	Egfr-IR	4	6	365.513
Esg	2	HStoHY	7	HY	60012	Egfr-IR	4	6	437.299
Esg	2	HStoHY	7	HY	60012	Egfr-IR	4	7	404.596
Esg	2	HStoHY	7	HY	60012	Egfr-IR	4	7	411.974
Esg	2	HStoHY	7	HY	60012	Egfr-IR	4	7	350.158
Esg	2	HStoHY	7	HY	60012	Egfr-IR	4	7	479.773
Esg	2	HStoHY	7	HY	60012	Egfr-IR	4	7	677.983
Esg	2	HStoHY	7	HY	60012	Egfr-IR	4	7	541.987
Esg	2	HStoHY	7	HY	60012	Egfr-IR	4	7	369.501
Esg	2	HStoHY	7	HY	60012	Egfr-IR	4	7	480.57
Esg	2	HStoHY	7	HY	60012	Egfr-IR	4	7	444.278
Esg	2	HStoHY	7	HY	60012	Egfr-IR	4	7	332.212
Esg	2	HStoHY	7	HY	60012	Egfr-IR	4	7	429.323
Esg	2	HStoHY	7	HY	60012	Egfr-IR	4	7	338.792
Esg	2	HStoHY	7	HY	60012	Egfr-IR	4	7	490.341
Esg	2	HStoHY	7	HY	60012	Egfr-IR	4	7	479.573
Esg	2	HStoHY	7	HY	60012	Egfr-IR	4	7	308.283
Esg	2	HStoHY	7	HY	60012	Egfr-IR	4	7	307.884
Esg	2	HStoHY	7	HY	60012	Egfr-IR	4	7	514.469
Esg	2	HStoHY	7	HY	60012	Egfr-IR	4	7	482.564
Esg	2	HStoHY	7	HY	60012	Egfr-IR	4	7	481.368
Esg	2	HStoHY	7	HY	60012	Egfr-IR	4	7	552.556
Esg	2	HStoHY	7	HY	60012	Egfr-IR	4	7	284.155
Esg	2	HStoHY	7	HY	60012	Egfr-IR	4	7	411.177
Esg	2	HStoHY	7	HY	60012	Egfr-IR	4	7	511.279
Esg	2	HStoHY	7	HY	60012	Egfr-IR	4	7	325.033
Esg	2	HStoHY	7	HY	60012	Egfr-IR	4	7	545.776
Esg	2	HStoHY	7	HY	60012	Egfr-IR	4	7	407.189
Esg	2	HStoHY	7	HY	60012	Egfr-IR	4	7	488.945
Esg	2	HStoHY	7	HY	60012	Egfr-IR	4	7	242.479
Esg	2	HStoHY	7	HY	60012	Egfr-IR	4	7	412.174
Esg	2	HStoHY	7	HY	60012	Egfr-IR	4	7	443.481
Esg	2	HStoHY	7	HY	60012	Egfr-IR	4	8	405.194
Esg	2	HStoHY	7	HY	60012	Egfr-IR	4	8	420.549
Esg	2	HStoHY	7	HY	60012	Egfr-IR	4	8	491.936
Esg	2	HStoHY	7	HY	60012	Egfr-IR	4	8	397.816
Esg	2	HStoHY	7	HY	60012	Egfr-IR	4	8	406.59
Esg	2	HStoHY	7	HY	60012	Egfr-IR	4	8	354.745
Esg	2	HStoHY	7	HY	60012	Egfr-IR	4	8	375.483
Esg	2	HStoHY	7	HY	60012	Egfr-IR	4	8	355.941
Esg	2	HStoHY	7	HY	60012	Egfr-IR	4	8	293.327
Esg	2	HStoHY	7	HY	60012	Egfr-IR	4	8	328.622
Esg	2	HStoHY	7	HY	60012	Egfr-IR	4	8	263.815
Esg	2	HStoHY	7	HY	60012	Egfr-IR	4	8	392.831
Esg	2	HStoHY	7	HY	60012	Egfr-IR	4	8	330.218
Esg	2	HStoHY	7	HY	60012	Egfr-IR	4	8	256.238
Esg	2	HStoHY	7	HY	60012	Egfr-IR	4	8	357.137
Esg	2	HStoHY	7	HY	60012	Egfr-IR	4	8	327.825
Esg	2	HStoHY	7	HY	60012	Egfr-IR	4	8	229.916
Esg	2	HStoHY	7	HY	60012	Egfr-IR	4	8	314.464
Esg	2	HStoHY	7	HY	60012	Egfr-IR	4	8	518.657
Esg	2	HStoHY	7	HY	60012	Egfr-IR	4	8	327.426
Esg	2	HStoHY	7	HY	60012	Egfr-IR	4	8	365.513
Esg	2	HStoHY	7	HY	60012	Egfr-IR	4	8	315.461
Esg	2	HStoHY	7	HY	60012	Egfr-IR	4	8	504.1
Esg	2	HStoHY	7	HY	60012	Egfr-IR	4	8	374.685
Esg	2	HStoHY	7	HY	60012	Egfr-IR	4	8	558.339
Esg	2	HStoHY	7	HY	60012	Egfr-IR	4	8	434.707
Esg	2	HStoHY	7	HY	60012	Egfr-IR	4	8	544.779
Esg	2	HStoHY	7	HY	60012	Egfr-IR	4	8	359.331
Esg	2	HStoHY	7	HY	60012	Egfr-IR	4	8	311.274
Esg	2	HStoHY	7	HY	60012	Egfr-IR	4	8	374.087
Esg	2	HStoHY	7	HY	Cs	Control	4	1	345.771
Esg	2	HStoHY	7	HY	Cs	Control	4	1	473.192
Esg	2	HStoHY	7	HY	Cs	Control	4	1	347.167
Esg	2	HStoHY	7	HY	Cs	Control	4	1	532.017
Esg	2	HStoHY	7	HY	Cs	Control	4	1	599.417
Esg	2	HStoHY	7	HY	Cs	Control	4	1	453.052
Esg	2	HStoHY	7	HY	Cs	Control	4	1	348.364
Esg	2	HStoHY	7	HY	Cs	Control	4	1	582.068
Esg	2	HStoHY	7	HY	Cs	Control	4	1	248.261
Esg	2	HStoHY	7	HY	Cs	Control	4	1	442.484
Esg	2	HStoHY	7	HY	Cs	Control	4	1	218.35
Esg	2	HStoHY	7	HY	Cs	Control	4	1	388.444
Esg	2	HStoHY	7	HY	Cs	Control	4	1	367.905
Esg	2	HStoHY	7	HY	Cs	Control	4	1	244.672
Esg	2	HStoHY	7	HY	Cs	Control	4	1	454.647
Esg	2	HStoHY	7	HY	Cs	Control	4	1	396.221
Esg	2	HStoHY	7	HY	Cs	Control	4	1	490.541
Esg	2	HStoHY	7	HY	Cs	Control	4	1	318.054
Esg	2	HStoHY	7	HY	Cs	Control	4	1	225.728
Esg	2	HStoHY	7	HY	Cs	Control	4	1	302.101
Esg	2	HStoHY	7	HY	Cs	Control	4	1	323.438
Esg	2	HStoHY	7	HY	Cs	Control	4	1	313.467
Esg	2	HStoHY	7	HY	Cs	Control	4	1	448.665
Esg	2	HStoHY	7	HY	Cs	Control	4	1	424.537
Esg	2	HStoHY	7	HY	Cs	Control	4	1	188.838
Esg	2	HStoHY	7	HY	Cs	Control	4	1	198.609
Esg	2	HStoHY	7	HY	Cs	Control	4	1	188.838
Esg	2	HStoHY	7	HY	Cs	Control	4	1	515.068
Esg	2	HStoHY	7	HY	Cs	Control	4	1	565.119
Esg	2	HStoHY	7	HY	Cs	Control	4	1	294.723
Esg	2	HStoHY	7	HY	Cs	Control	4	2	476.781
Esg	2	HStoHY	7	HY	Cs	Control	4	2	324.834
Esg	2	HStoHY	7	HY	Cs	Control	4	2	270.595
Esg	2	HStoHY	7	HY	Cs	Control	4	2	300.705
Esg	2	HStoHY	7	HY	Cs	Control	4	2	273.586
Esg	2	HStoHY	7	HY	Cs	Control	4	2	186.645
Esg	2	HStoHY	7	HY	Cs	Control	4	2	236.297
Esg	2	HStoHY	7	HY	Cs	Control	4	2	227.523
Esg	2	HStoHY	7	HY	Cs	Control	4	2	437.498
Esg	2	HStoHY	7	HY	Cs	Control	4	2	212.368
Esg	2	HStoHY	7	HY	Cs	Control	4	2	339.789
Esg	2	HStoHY	7	HY	Cs	Control	4	2	250.255
Esg	2	HStoHY	7	HY	Cs	Control	4	2	183.654
Esg	2	HStoHY	7	HY	Cs	Control	4	2	140.781
Esg	2	HStoHY	7	HY	Cs	Control	4	2	385.453
Esg	2	HStoHY	7	HY	Cs	Control	4	2	407.986
Esg	2	HStoHY	7	HY	Cs	Control	4	2	316.458
Esg	2	HStoHY	7	HY	Cs	Control	4	2	218.55
Esg	2	HStoHY	7	HY	Cs	Control	4	2	206.585
Esg	2	HStoHY	7	HY	Cs	Control	4	2	252.848
Esg	2	HStoHY	7	HY	Cs	Control	4	2	268.003
Esg	2	HStoHY	7	HY	Cs	Control	4	2	336.798
Esg	2	HStoHY	7	HY	Cs	Control	4	2	179.665
Esg	2	HStoHY	7	HY	Cs	Control	4	2	303.497
Esg	2	HStoHY	7	HY	Cs	Control	4	2	367.905
Esg	2	HStoHY	7	HY	Cs	Control	4	2	285.75
Esg	2	HStoHY	7	HY	Cs	Control	4	2	350.756
Esg	2	HStoHY	7	HY	Cs	Control	4	2	616.366
Esg	2	HStoHY	7	HY	Cs	Control	4	2	438.097
Esg	2	HStoHY	7	HY	Cs	Control	4	2	305.89
Esg	2	HStoHY	7	HY	Cs	Control	4	3	319.051
Esg	2	HStoHY	7	HY	Cs	Control	4	3	207.184
Esg	2	HStoHY	7	HY	Cs	Control	4	3	207.782
Esg	2	HStoHY	7	HY	Cs	Control	4	3	267.803
Esg	2	HStoHY	7	HY	Cs	Control	4	3	156.335
Esg	2	HStoHY	7	HY	Cs	Control	4	3	237.095
Esg	2	HStoHY	7	HY	Cs	Control	4	3	185.648
Esg	2	HStoHY	7	HY	Cs	Control	4	3	136.594
Esg	2	HStoHY	7	HY	Cs	Control	4	3	255.639
Esg	2	HStoHY	7	HY	Cs	Control	4	3	305.691
Esg	2	HStoHY	7	HY	Cs	Control	4	3	450.46
Esg	2	HStoHY	7	HY	Cs	Control	4	3	172.487
Esg	2	HStoHY	7	HY	Cs	Control	4	3	144.37
Esg	2	HStoHY	7	HY	Cs	Control	4	3	167.103
Esg	2	HStoHY	7	HY	Cs	Control	4	3	227.523
Esg	2	HStoHY	7	HY	Cs	Control	4	3	112.665
Esg	2	HStoHY	7	HY	Cs	Control	4	3	162.716
Esg	2	HStoHY	7	HY	Cs	Control	4	3	197.413
Esg	2	HStoHY	7	HY	Cs	Control	4	3	151.549
Esg	2	HStoHY	7	HY	Cs	Control	4	3	238.291
Esg	2	HStoHY	7	HY	Cs	Control	4	3	150.353
Esg	2	HStoHY	7	HY	Cs	Control	4	3	159.525
Esg	2	HStoHY	7	HY	Cs	Control	4	3	285.949
Esg	2	HStoHY	7	HY	Cs	Control	4	3	272.39
Esg	2	HStoHY	7	HY	Cs	Control	4	3	592.039
Esg	2	HStoHY	7	HY	Cs	Control	4	3	210.773
Esg	2	HStoHY	7	HY	Cs	Control	4	3	195.219
Esg	2	HStoHY	7	HY	Cs	Control	4	3	220.943
Esg	2	HStoHY	7	HY	Cs	Control	4	3	433.111
Esg	2	HStoHY	7	HY	Cs	Control	4	3	303.098
Esg	2	HStoHY	7	HY	Cs	Control	4	4	218.151
Esg	2	HStoHY	7	HY	Cs	Control	4	4	235.699
Esg	2	HStoHY	7	HY	Cs	Control	4	4	184.85
Esg	2	HStoHY	7	HY	Cs	Control	4	4	274.583
Esg	2	HStoHY	7	HY	Cs	Control	4	4	278.771
Esg	2	HStoHY	7	HY	Cs	Control	4	4	303.696
Esg	2	HStoHY	7	HY	Cs	Control	4	4	374.885
Esg	2	HStoHY	7	HY	Cs	Control	4	4	340.587
Esg	2	HStoHY	7	HY	Cs	Control	4	4	215.16
Esg	2	HStoHY	7	HY	Cs	Control	4	4	344.974
Esg	2	HStoHY	7	HY	Cs	Control	4	4	281.762
Esg	2	HStoHY	7	HY	Cs	Control	4	4	210.773
Esg	2	HStoHY	7	HY	Cs	Control	4	4	443.281
Esg	2	HStoHY	7	HY	Cs	Control	4	4	418.754
Esg	2	HStoHY	7	HY	Cs	Control	4	4	260.226
Esg	2	HStoHY	7	HY	Cs	Control	4	4	374.286
Esg	2	HStoHY	7	HY	Cs	Control	4	4	342.381
Esg	2	HStoHY	7	HY	Cs	Control	4	4	170.293
Esg	2	HStoHY	7	HY	Cs	Control	4	4	337.396
Esg	2	HStoHY	7	HY	Cs	Control	4	4	143.972
Esg	2	HStoHY	7	HY	Cs	Control	4	4	242.479
Esg	2	HStoHY	7	HY	Cs	Control	4	4	437.498
Esg	2	HStoHY	7	HY	Cs	Control	4	4	320.048
Esg	2	HStoHY	7	HY	Cs	Control	4	4	226.725
Esg	2	HStoHY	7	HY	Cs	Control	4	4	266.407
Esg	2	HStoHY	7	HY	Cs	Control	4	4	242.678
Esg	2	HStoHY	7	HY	Cs	Control	4	4	380.069
Esg	2	HStoHY	7	HY	Cs	Control	4	4	295.521
Esg	2	HStoHY	7	HY	Cs	Control	4	4	253.247
Esg	2	HStoHY	7	HY	Cs	Control	4	4	214.163
Esg	2	HStoHY	7	HY	Cs	Control	4	5	331.813
Esg	2	HStoHY	7	HY	Cs	Control	4	5	468.805
Esg	2	HStoHY	7	HY	Cs	Control	4	5	329.021
Esg	2	HStoHY	7	HY	Cs	Control	4	5	322.241
Esg	2	HStoHY	7	HY	Cs	Control	4	5	265.41
Esg	2	HStoHY	7	HY	Cs	Control	4	5	300.705
Esg	2	HStoHY	7	HY	Cs	Control	4	5	710.885
Esg	2	HStoHY	7	HY	Cs	Control	4	5	276.577
Esg	2	HStoHY	7	HY	Cs	Control	4	5	345.771
Esg	2	HStoHY	7	HY	Cs	Control	4	5	296.518
Esg	2	HStoHY	7	HY	Cs	Control	4	5	432.713
Esg	2	HStoHY	7	HY	Cs	Control	4	5	496.124
Esg	2	HStoHY	7	HY	Cs	Control	4	5	372.691
Esg	2	HStoHY	7	HY	Cs	Control	4	5	286.747
Esg	2	HStoHY	7	HY	Cs	Control	4	5	352.551
Esg	2	HStoHY	7	HY	Cs	Control	4	5	181.66
Esg	2	HStoHY	7	HY	Cs	Control	4	5	247.065
Esg	2	HStoHY	7	HY	Cs	Control	4	5	296.318
Esg	2	HStoHY	7	HY	Cs	Control	4	5	385.054
Esg	2	HStoHY	7	HY	Cs	Control	4	5	232.708
Esg	2	HStoHY	7	HY	Cs	Control	4	5	190.035
Esg	2	HStoHY	7	HY	Cs	Control	4	5	223.934
Esg	2	HStoHY	7	HY	Cs	Control	4	5	550.961
Esg	2	HStoHY	7	HY	Cs	Control	4	5	489.544
Esg	2	HStoHY	7	HY	Cs	Control	4	5	265.809
Esg	2	HStoHY	7	HY	Cs	Control	4	5	330.616
Esg	2	HStoHY	7	HY	Cs	Control	4	5	210.972
Esg	2	HStoHY	7	HY	Cs	Control	4	5	257.235
Esg	2	HStoHY	7	HY	Cs	Control	4	5	229.118
Esg	2	HStoHY	7	HY	Cs	Control	4	5	388.444
Esg	2	HStoHY	7	HY	Cs	Control	4	6	251.053
Esg	2	HStoHY	7	HY	Cs	Control	4	6	178.07
Esg	2	HStoHY	7	HY	Cs	Control	4	6	116.055
Esg	2	HStoHY	7	HY	Cs	Control	4	6	379.87
Esg	2	HStoHY	7	HY	Cs	Control	4	6	230.315
Esg	2	HStoHY	7	HY	Cs	Control	4	6	96.912
Esg	2	HStoHY	7	HY	Cs	Control	4	6	349.161
Esg	2	HStoHY	7	HY	Cs	Control	4	6	141.18
Esg	2	HStoHY	7	HY	Cs	Control	4	6	299.509
Esg	2	HStoHY	7	HY	Cs	Control	4	6	220.743
Esg	2	HStoHY	7	HY	Cs	Control	4	6	224.133
Esg	2	HStoHY	7	HY	Cs	Control	4	6	249.258
Esg	2	HStoHY	7	HY	Cs	Control	4	6	397.218
Esg	2	HStoHY	7	HY	Cs	Control	4	6	146.165
Esg	2	HStoHY	7	HY	Cs	Control	4	6	125.427
Esg	2	HStoHY	7	HY	Cs	Control	4	6	171.29
Esg	2	HStoHY	7	HY	Cs	Control	4	6	227.922
Esg	2	HStoHY	7	HY	Cs	Control	4	6	196.615
Esg	2	HStoHY	7	HY	Cs	Control	4	6	252.05
Esg	2	HStoHY	7	HY	Cs	Control	4	6	248.461
Esg	2	HStoHY	7	HY	Cs	Control	4	6	154.341
Esg	2	HStoHY	7	HY	Cs	Control	4	6	146.763
Esg	2	HStoHY	7	HY	Cs	Control	4	6	150.751
Esg	2	HStoHY	7	HY	Cs	Control	4	6	166.903
Esg	2	HStoHY	7	HY	Cs	Control	4	6	149.954
Esg	2	HStoHY	7	HY	Cs	Control	4	6	170.692
Esg	2	HStoHY	7	HY	Cs	Control	4	6	160.921
Esg	2	HStoHY	7	HY	Cs	Control	4	6	132.007
Esg	2	HStoHY	7	HY	Cs	Control	4	6	232.907
Esg	2	HStoHY	7	HY	Cs	Control	4	6	169.895
Esg	2	HStoHY	7	HY	Cs	Control	4	7	246.666
Esg	2	HStoHY	7	HY	Cs	Control	4	7	267.604
Esg	2	HStoHY	7	HY	Cs	Control	4	7	254.443
Esg	2	HStoHY	7	HY	Cs	Control	4	7	244.273
Esg	2	HStoHY	7	HY	Cs	Control	4	7	283.556
Esg	2	HStoHY	7	HY	Cs	Control	4	7	321.045
Esg	2	HStoHY	7	HY	Cs	Control	4	7	277.175
Esg	2	HStoHY	7	HY	Cs	Control	4	7	270.196
Esg	2	HStoHY	7	HY	Cs	Control	4	7	236.696
Esg	2	HStoHY	7	HY	Cs	Control	4	7	239.089
Esg	2	HStoHY	7	HY	Cs	Control	4	7	330.018
Esg	2	HStoHY	7	HY	Cs	Control	4	7	303.298
Esg	2	HStoHY	7	HY	Cs	Control	4	7	255.44
Esg	2	HStoHY	7	HY	Cs	Control	4	7	295.521
Esg	2	HStoHY	7	HY	Cs	Control	4	7	174.88
Esg	2	HStoHY	7	HY	Cs	Control	4	7	346.768
Esg	2	HStoHY	7	HY	Cs	Control	4	7	255.44
Esg	2	HStoHY	7	HY	Cs	Control	4	7	225.928
Esg	2	HStoHY	7	HY	Cs	Control	4	7	253.047
Esg	2	HStoHY	7	HY	Cs	Control	4	7	275.78
Esg	2	HStoHY	7	HY	Cs	Control	4	7	329.42
Esg	2	HStoHY	7	HY	Cs	Control	4	7	260.226
Esg	2	HStoHY	7	HY	Cs	Control	4	7	265.809
Esg	2	HStoHY	7	HY	Cs	Control	4	7	207.782
Esg	2	HStoHY	7	HY	Cs	Control	4	7	288.741
Esg	2	HStoHY	7	HY	Cs	Control	4	7	224.931
Esg	2	HStoHY	7	HY	Cs	Control	4	7	280.366
Esg	2	HStoHY	7	HY	Cs	Control	4	7	298.711
Esg	2	HStoHY	7	HY	Cs	Control	4	7	189.436
Esg	2	HStoHY	7	HY	Cs	Control	4	7	280.565
Esg	2	HStoHY	7	HY	Cs	Control	4	8	230.315
Esg	2	HStoHY	7	HY	Cs	Control	4	8	260.026
Esg	2	HStoHY	7	HY	Cs	Control	4	8	526.833
Esg	2	HStoHY	7	HY	Cs	Control	4	8	726.638
Esg	2	HStoHY	7	HY	Cs	Control	4	8	394.427
Esg	2	HStoHY	7	HY	Cs	Control	4	8	506.892
Esg	2	HStoHY	7	HY	Cs	Control	4	8	215.359
Esg	2	HStoHY	7	HY	Cs	Control	4	8	484.359
Esg	2	HStoHY	7	HY	Cs	Control	4	8	706.897
Esg	2	HStoHY	7	HY	Cs	Control	4	8	471.796
Esg	2	HStoHY	7	HY	Cs	Control	4	8	226.127
Esg	2	HStoHY	7	HY	Cs	Control	4	8	205.788
Esg	2	HStoHY	7	HY	Cs	Control	4	8	279.768
Esg	2	HStoHY	7	HY	Cs	Control	4	8	191.63
Esg	2	HStoHY	7	HY	Cs	Control	4	8	333.209
Esg	2	HStoHY	7	HY	Cs	Control	4	8	294.723
Esg	2	HStoHY	7	HY	Cs	Control	4	8	174.082
Esg	2	HStoHY	7	HY	Cs	Control	4	8	375.882
Esg	2	HStoHY	7	HY	Cs	Control	4	8	321.444
Esg	2	HStoHY	7	HY	Cs	Control	4	8	414.965
Esg	2	HStoHY	7	HY	Cs	Control	4	8	435.105
Esg	2	HStoHY	7	HY	Cs	Control	4	8	376.081
Esg	2	HStoHY	7	HY	Cs	Control	4	8	407.189
Esg	2	HStoHY	7	HY	Cs	Control	4	8	272.988
Esg	2	HStoHY	7	HY	Cs	Control	4	8	211.571
Esg	2	HStoHY	7	HY	Cs	Control	4	8	185.049
Esg	2	HStoHY	7	HY	Cs	Control	4	8	300.506
Esg	2	HStoHY	7	HY	Cs	Control	4	8	322.64
Esg	2	HStoHY	7	HY	Cs	Control	4	8	555.547
Esg	2	HStoHY	7	HY	Cs	Control	4	8	474.389
Esg	2	HS	0	HS	Cs	Control	4	1	150.353
Esg	2	HS	0	HS	Cs	Control	4	1	91.129
Esg	2	HS	0	HS	Cs	Control	4	1	64.408
Esg	2	HS	0	HS	Cs	Control	4	1	57.429
Esg	2	HS	0	HS	Cs	Control	4	1	60.021
Esg	2	HS	0	HS	Cs	Control	4	1	119.046
Esg	2	HS	0	HS	Cs	Control	4	1	65.007
Esg	2	HS	0	HS	Cs	Control	4	1	148.957
Esg	2	HS	0	HS	Cs	Control	4	1	94.519
Esg	2	HS	0	HS	Cs	Control	4	1	185.448
Esg	2	HS	0	HS	Cs	Control	4	1	87.141
Esg	2	HS	0	HS	Cs	Control	4	1	218.949
Esg	2	HS	0	HS	Cs	Control	4	1	220.943
Esg	2	HS	0	HS	Cs	Control	4	1	132.207
Esg	2	HS	0	HS	Cs	Control	4	1	138.787
Esg	2	HS	0	HS	Cs	Control	4	1	94.918
Esg	2	HS	0	HS	Cs	Control	4	1	89.135
Esg	2	HS	0	HS	Cs	Control	4	1	110.471
Esg	2	HS	0	HS	Cs	Control	4	1	80.361
Esg	2	HS	0	HS	Cs	Control	4	1	71.587
Esg	2	HS	0	HS	Cs	Control	4	1	125.826
Esg	2	HS	0	HS	Cs	Control	4	1	106.084
Esg	2	HS	0	HS	Cs	Control	4	1	97.709
Esg	2	HS	0	HS	Cs	Control	4	1	88.537
Esg	2	HS	0	HS	Cs	Control	4	1	132.406
Esg	2	HS	0	HS	Cs	Control	4	1	102.495
Esg	2	HS	0	HS	Cs	Control	4	1	116.254
Esg	2	HS	0	HS	Cs	Control	4	1	94.12
Esg	2	HS	0	HS	Cs	Control	4	1	88.935
Esg	2	HS	0	HS	Cs	Control	4	1	103.891
Esg	2	HS	0	HS	Cs	Control	4	2	61.417
Esg	2	HS	0	HS	Cs	Control	4	2	120.641
Esg	2	HS	0	HS	Cs	Control	4	2	55.435
Esg	2	HS	0	HS	Cs	Control	4	2	119.245
Esg	2	HS	0	HS	Cs	Control	4	2	106.084
Esg	2	HS	0	HS	Cs	Control	4	2	74.977
Esg	2	HS	0	HS	Cs	Control	4	2	85.147
Esg	2	HS	0	HS	Cs	Control	4	2	135.796
Esg	2	HS	0	HS	Cs	Control	4	2	76.173
Esg	2	HS	0	HS	Cs	Control	4	2	73.382
Esg	2	HS	0	HS	Cs	Control	4	2	92.325
Esg	2	HS	0	HS	Cs	Control	4	2	51.248
Esg	2	HS	0	HS	Cs	Control	4	2	105.686
Esg	2	HS	0	HS	Cs	Control	4	2	44.069
Esg	2	HS	0	HS	Cs	Control	4	2	109.474
Esg	2	HS	0	HS	Cs	Control	4	2	101.697
Esg	2	HS	0	HS	Cs	Control	4	2	85.545
Esg	2	HS	0	HS	Cs	Control	4	2	69.394
Esg	2	HS	0	HS	Cs	Control	4	2	74.578
Esg	2	HS	0	HS	Cs	Control	4	2	88.736
Esg	2	HS	0	HS	Cs	Control	4	2	64.01
Esg	2	HS	0	HS	Cs	Control	4	2	68.397
Esg	2	HS	0	HS	Cs	Control	4	2	53.84
Esg	2	HS	0	HS	Cs	Control	4	2	49.453
Esg	2	HS	0	HS	Cs	Control	4	2	76.373
Esg	2	HS	0	HS	Cs	Control	4	2	83.551
Esg	2	HS	0	HS	Cs	Control	4	2	86.343
Esg	2	HS	0	HS	Cs	Control	4	2	77.37
Esg	2	HS	0	HS	Cs	Control	4	2	95.516
Esg	2	HS	0	HS	Cs	Control	4	2	122.037
Esg	2	HS	0	HS	Cs	Control	4	3	92.525
Esg	2	HS	0	HS	Cs	Control	4	3	32.503
Esg	2	HS	0	HS	Cs	Control	4	3	68.397
Esg	2	HS	0	HS	Cs	Control	4	3	31.506
Esg	2	HS	0	HS	Cs	Control	4	3	58.825
Esg	2	HS	0	HS	Cs	Control	4	3	99.903
Esg	2	HS	0	HS	Cs	Control	4	3	76.173
Esg	2	HS	0	HS	Cs	Control	4	3	31.107
Esg	2	HS	0	HS	Cs	Control	4	3	39.283
Esg	2	HS	0	HS	Cs	Control	4	3	78.367
Esg	2	HS	0	HS	Cs	Control	4	3	38.685
Esg	2	HS	0	HS	Cs	Control	4	3	87.34
Esg	2	HS	0	HS	Cs	Control	4	3	56.432
Esg	2	HS	0	HS	Cs	Control	4	3	148.359
Esg	2	HS	0	HS	Cs	Control	4	3	42.673
Esg	2	HS	0	HS	Cs	Control	4	3	81.358
Esg	2	HS	0	HS	Cs	Control	4	3	94.319
Esg	2	HS	0	HS	Cs	Control	4	3	82.953
Esg	2	HS	0	HS	Cs	Control	4	3	120.641
Esg	2	HS	0	HS	Cs	Control	4	3	66.402
Esg	2	HS	0	HS	Cs	Control	4	3	58.227
Esg	2	HS	0	HS	Cs	Control	4	3	65.804
Esg	2	HS	0	HS	Cs	Control	4	3	223.136
Esg	2	HS	0	HS	Cs	Control	4	3	81.358
Esg	2	HS	0	HS	Cs	Control	4	3	44.069
Esg	2	HS	0	HS	Cs	Control	4	3	44.069
Esg	2	HS	0	HS	Cs	Control	4	3	104.489
Esg	2	HS	0	HS	Cs	Control	4	3	42.673
Esg	2	HS	0	HS	Cs	Control	4	3	33.301
Esg	2	HS	0	HS	Cs	Control	4	3	75.376
Esg	2	HS	0	HS	Cs	Control	4	4	57.629
Esg	2	HS	0	HS	Cs	Control	4	4	48.456
Esg	2	HS	0	HS	Cs	Control	4	4	81.956
Esg	2	HS	0	HS	Cs	Control	4	4	96.313
Esg	2	HS	0	HS	Cs	Control	4	4	79.563
Esg	2	HS	0	HS	Cs	Control	4	4	53.441
Esg	2	HS	0	HS	Cs	Control	4	4	76.373
Esg	2	HS	0	HS	Cs	Control	4	4	67.798
Esg	2	HS	0	HS	Cs	Control	4	4	83.95
Esg	2	HS	0	HS	Cs	Control	4	4	54.039
Esg	2	HS	0	HS	Cs	Control	4	4	55.435
Esg	2	HS	0	HS	Cs	Control	4	4	82.156
Esg	2	HS	0	HS	Cs	Control	4	4	106.483
Esg	2	HS	0	HS	Cs	Control	4	4	40.48
Esg	2	HS	0	HS	Cs	Control	4	4	47.858
Esg	2	HS	0	HS	Cs	Control	4	4	73.581
Esg	2	HS	0	HS	Cs	Control	4	4	39.084
Esg	2	HS	0	HS	Cs	Control	4	4	48.256
Esg	2	HS	0	HS	Cs	Control	4	4	43.869
Esg	2	HS	0	HS	Cs	Control	4	4	52.643
Esg	2	HS	0	HS	Cs	Control	4	4	43.072
Esg	2	HS	0	HS	Cs	Control	4	4	88.138
Esg	2	HS	0	HS	Cs	Control	4	4	58.426
Esg	2	HS	0	HS	Cs	Control	4	4	50.649
Esg	2	HS	0	HS	Cs	Control	4	4	47.06
Esg	2	HS	0	HS	Cs	Control	4	4	37.688
Esg	2	HS	0	HS	Cs	Control	4	4	41.078
Esg	2	HS	0	HS	Cs	Control	4	4	91.129
Esg	2	HS	0	HS	Cs	Control	4	4	48.456
Esg	2	HS	0	HS	Cs	Control	4	4	81.159
Esg	2	HS	0	HS	Cs	Control	4	5	71.188
Esg	2	HS	0	HS	Cs	Control	4	5	67.798
Esg	2	HS	0	HS	Cs	Control	4	5	76.373
Esg	2	HS	0	HS	Cs	Control	4	5	63.81
Esg	2	HS	0	HS	Cs	Control	4	5	89.135
Esg	2	HS	0	HS	Cs	Control	4	5	106.882
Esg	2	HS	0	HS	Cs	Control	4	5	57.629
Esg	2	HS	0	HS	Cs	Control	4	5	56.033
Esg	2	HS	0	HS	Cs	Control	4	5	87.739
Esg	2	HS	0	HS	Cs	Control	4	5	80.56
Esg	2	HS	0	HS	Cs	Control	4	5	42.274
Esg	2	HS	0	HS	Cs	Control	4	5	78.965
Esg	2	HS	0	HS	Cs	Control	4	5	70.191
Esg	2	HS	0	HS	Cs	Control	4	5	96.712
Esg	2	HS	0	HS	Cs	Control	4	5	82.953
Esg	2	HS	0	HS	Cs	Control	4	5	49.453
Esg	2	HS	0	HS	Cs	Control	4	5	63.212
Esg	2	HS	0	HS	Cs	Control	4	5	46.262
Esg	2	HS	0	HS	Cs	Control	4	5	51.646
Esg	2	HS	0	HS	Cs	Control	4	5	89.733
Esg	2	HS	0	HS	Cs	Control	4	5	82.554
Esg	2	HS	0	HS	Cs	Control	4	5	103.891
Esg	2	HS	0	HS	Cs	Control	4	5	76.772
Esg	2	HS	0	HS	Cs	Control	4	5	71.188
Esg	2	HS	0	HS	Cs	Control	4	5	104.29
Esg	2	HS	0	HS	Cs	Control	4	5	108.078
Esg	2	HS	0	HS	Cs	Control	4	5	54.239
Esg	2	HS	0	HS	Cs	Control	4	5	49.852
Esg	2	HS	0	HS	Cs	Control	4	5	68.995
Esg	2	HS	0	HS	Cs	Control	4	5	44.667
Esg	2	HS	0	HS	Cs	Control	4	6	60.221
Esg	2	HS	0	HS	Cs	Control	4	6	59.623
Esg	2	HS	0	HS	Cs	Control	4	6	74.379
Esg	2	HS	0	HS	Cs	Control	4	6	55.236
Esg	2	HS	0	HS	Cs	Control	4	6	76.373
Esg	2	HS	0	HS	Cs	Control	4	6	81.956
Esg	2	HS	0	HS	Cs	Control	4	6	69.394
Esg	2	HS	0	HS	Cs	Control	4	6	68.995
Esg	2	HS	0	HS	Cs	Control	4	6	108.677
Esg	2	HS	0	HS	Cs	Control	4	6	46.063
Esg	2	HS	0	HS	Cs	Control	4	6	51.646
Esg	2	HS	0	HS	Cs	Control	4	6	74.778
Esg	2	HS	0	HS	Cs	Control	4	6	93.721
Esg	2	HS	0	HS	Cs	Control	4	6	59.623
Esg	2	HS	0	HS	Cs	Control	4	6	48.256
Esg	2	HS	0	HS	Cs	Control	4	6	97.111
Esg	2	HS	0	HS	Cs	Control	4	6	83.352
Esg	2	HS	0	HS	Cs	Control	4	6	72.584
Esg	2	HS	0	HS	Cs	Control	4	6	97.111
Esg	2	HS	0	HS	Cs	Control	4	6	88.337
Esg	2	HS	0	HS	Cs	Control	4	6	45.265
Esg	2	HS	0	HS	Cs	Control	4	6	153.743
Esg	2	HS	0	HS	Cs	Control	4	6	56.632
Esg	2	HS	0	HS	Cs	Control	4	6	55.036
Esg	2	HS	0	HS	Cs	Control	4	6	92.724
Esg	2	HS	0	HS	Cs	Control	4	6	131.01
Esg	2	HS	0	HS	Cs	Control	4	6	83.153
Esg	2	HS	0	HS	Cs	Control	4	6	104.29
Esg	2	HS	0	HS	Cs	Control	4	6	64.608
Esg	2	HS	0	HS	Cs	Control	4	6	68.596
Esg	2	HS	0	HS	Cs	Control	4	7	54.438
Esg	2	HS	0	HS	Cs	Control	4	7	89.932
Esg	2	HS	0	HS	Cs	Control	4	7	81.757
Esg	2	HS	0	HS	Cs	Control	4	7	73.581
Esg	2	HS	0	HS	Cs	Control	4	7	30.11
Esg	2	HS	0	HS	Cs	Control	4	7	77.37
Esg	2	HS	0	HS	Cs	Control	4	7	51.248
Esg	2	HS	0	HS	Cs	Control	4	7	71.388
Esg	2	HS	0	HS	Cs	Control	4	7	77.17
Esg	2	HS	0	HS	Cs	Control	4	7	80.959
Esg	2	HS	0	HS	Cs	Control	4	7	75.575
Esg	2	HS	0	HS	Cs	Control	4	7	74.778
Esg	2	HS	0	HS	Cs	Control	4	7	96.912
Esg	2	HS	0	HS	Cs	Control	4	7	80.76
Esg	2	HS	0	HS	Cs	Control	4	7	77.37
Esg	2	HS	0	HS	Cs	Control	4	7	104.689
Esg	2	HS	0	HS	Cs	Control	4	7	94.319
Esg	2	HS	0	HS	Cs	Control	4	7	71.587
Esg	2	HS	0	HS	Cs	Control	4	7	112.665
Esg	2	HS	0	HS	Cs	Control	4	7	72.783
Esg	2	HS	0	HS	Cs	Control	4	7	121.439
Esg	2	HS	0	HS	Cs	Control	4	7	81.557
Esg	2	HS	0	HS	Cs	Control	4	7	79.962
Esg	2	HS	0	HS	Cs	Control	4	7	85.745
Esg	2	HS	0	HS	Cs	Control	4	7	54.837
Esg	2	HS	0	HS	Cs	Control	4	7	88.935
Esg	2	HS	0	HS	Cs	Control	4	7	77.37
Esg	2	HS	0	HS	Cs	Control	4	7	86.343
Esg	2	HS	0	HS	Cs	Control	4	7	57.629
Esg	2	HS	0	HS	Cs	Control	4	7	80.76
Esg	2	HS	0	HS	60012	Egfr-IR	4	1	178.469
Esg	2	HS	0	HS	60012	Egfr-IR	4	1	70.391
Esg	2	HS	0	HS	60012	Egfr-IR	4	1	67.2
Esg	2	HS	0	HS	60012	Egfr-IR	4	1	113.064
Esg	2	HS	0	HS	60012	Egfr-IR	4	1	100.9
Esg	2	HS	0	HS	60012	Egfr-IR	4	1	83.551
Esg	2	HS	0	HS	60012	Egfr-IR	4	1	105.486
Esg	2	HS	0	HS	60012	Egfr-IR	4	1	51.447
Esg	2	HS	0	HS	60012	Egfr-IR	4	1	54.637
Esg	2	HS	0	HS	60012	Egfr-IR	4	1	74.379
Esg	2	HS	0	HS	60012	Egfr-IR	4	1	72.185
Esg	2	HS	0	HS	60012	Egfr-IR	4	1	107.281
Esg	2	HS	0	HS	60012	Egfr-IR	4	1	52.843
Esg	2	HS	0	HS	60012	Egfr-IR	4	1	58.227
Esg	2	HS	0	HS	60012	Egfr-IR	4	1	70.191
Esg	2	HS	0	HS	60012	Egfr-IR	4	1	68.995
Esg	2	HS	0	HS	60012	Egfr-IR	4	1	75.775
Esg	2	HS	0	HS	60012	Egfr-IR	4	1	135.597
Esg	2	HS	0	HS	60012	Egfr-IR	4	1	73.382
Esg	2	HS	0	HS	60012	Egfr-IR	4	1	57.429
Esg	2	HS	0	HS	60012	Egfr-IR	4	1	57.629
Esg	2	HS	0	HS	60012	Egfr-IR	4	1	91.129
Esg	2	HS	0	HS	60012	Egfr-IR	4	1	63.013
Esg	2	HS	0	HS	60012	Egfr-IR	4	1	72.783
Esg	2	HS	0	HS	60012	Egfr-IR	4	1	125.427
Esg	2	HS	0	HS	60012	Egfr-IR	4	1	87.54
Esg	2	HS	0	HS	60012	Egfr-IR	4	1	87.739
Esg	2	HS	0	HS	60012	Egfr-IR	4	1	92.325
Esg	2	HS	0	HS	60012	Egfr-IR	4	1	87.938
Esg	2	HS	0	HS	60012	Egfr-IR	4	1	109.674
Esg	2	HS	0	HS	60012	Egfr-IR	4	2	137.591
Esg	2	HS	0	HS	60012	Egfr-IR	4	2	126.623
Esg	2	HS	0	HS	60012	Egfr-IR	4	2	127.221
Esg	2	HS	0	HS	60012	Egfr-IR	4	2	122.436
Esg	2	HS	0	HS	60012	Egfr-IR	4	2	121.838
Esg	2	HS	0	HS	60012	Egfr-IR	4	2	203.395
Esg	2	HS	0	HS	60012	Egfr-IR	4	2	115.855
Esg	2	HS	0	HS	60012	Egfr-IR	4	2	106.683
Esg	2	HS	0	HS	60012	Egfr-IR	4	2	94.718
Esg	2	HS	0	HS	60012	Egfr-IR	4	2	141.978
Esg	2	HS	0	HS	60012	Egfr-IR	4	2	175.677
Esg	2	HS	0	HS	60012	Egfr-IR	4	2	151.35
Esg	2	HS	0	HS	60012	Egfr-IR	4	2	126.025
Esg	2	HS	0	HS	60012	Egfr-IR	4	2	208.579
Esg	2	HS	0	HS	60012	Egfr-IR	4	2	93.322
Esg	2	HS	0	HS	60012	Egfr-IR	4	2	87.141
Esg	2	HS	0	HS	60012	Egfr-IR	4	3	170.293
Esg	2	HS	0	HS	60012	Egfr-IR	4	3	110.471
Esg	2	HS	0	HS	60012	Egfr-IR	4	3	142.376
Esg	2	HS	0	HS	60012	Egfr-IR	4	3	84.947
Esg	2	HS	0	HS	60012	Egfr-IR	4	3	121.04
Esg	2	HS	0	HS	60012	Egfr-IR	4	3	88.537
Esg	2	HS	0	HS	60012	Egfr-IR	4	3	112.665
Esg	2	HS	0	HS	60012	Egfr-IR	4	3	91.727
Esg	2	HS	0	HS	60012	Egfr-IR	4	3	114.061
Esg	2	HS	0	HS	60012	Egfr-IR	4	3	142.975
Esg	2	HS	0	HS	60012	Egfr-IR	4	3	140.183
Esg	2	HS	0	HS	60012	Egfr-IR	4	3	96.712
Esg	2	HS	0	HS	60012	Egfr-IR	4	3	122.236
Esg	2	HS	0	HS	60012	Egfr-IR	4	3	77.569
Esg	2	HS	0	HS	60012	Egfr-IR	4	3	94.918
Esg	2	HS	0	HS	60012	Egfr-IR	4	3	74.778
Esg	2	HS	0	HS	60012	Egfr-IR	4	3	96.313
Esg	2	HS	0	HS	60012	Egfr-IR	4	3	99.504
Esg	2	HS	0	HS	60012	Egfr-IR	4	3	141.579
Esg	2	HS	0	HS	60012	Egfr-IR	4	3	171.29
Esg	2	HS	0	HS	60012	Egfr-IR	4	3	223.336
Esg	2	HS	0	HS	60012	Egfr-IR	4	3	130.213
Esg	2	HS	0	HS	60012	Egfr-IR	4	3	96.114
Esg	2	HS	0	HS	60012	Egfr-IR	4	3	144.969
Esg	2	HS	0	HS	60012	Egfr-IR	4	3	197.413
Esg	2	HS	0	HS	60012	Egfr-IR	4	3	92.325
Esg	2	HS	0	HS	60012	Egfr-IR	4	3	100.302
Esg	2	HS	0	HS	60012	Egfr-IR	4	3	102.096
Esg	2	HS	0	HS	60012	Egfr-IR	4	3	63.411
Esg	2	HS	0	HS	60012	Egfr-IR	4	3	161.32
Esg	2	HS	0	HS	60012	Egfr-IR	4	5	141.579
Esg	2	HS	0	HS	60012	Egfr-IR	4	5	91.129
Esg	2	HS	0	HS	60012	Egfr-IR	4	5	126.224
Esg	2	HS	0	HS	60012	Egfr-IR	4	5	181.859
Esg	2	HS	0	HS	60012	Egfr-IR	4	5	111.867
Esg	2	HS	0	HS	60012	Egfr-IR	4	5	143.174
Esg	2	HS	0	HS	60012	Egfr-IR	4	5	145.966
Esg	2	HS	0	HS	60012	Egfr-IR	4	5	185.847
Esg	2	HS	0	HS	60012	Egfr-IR	4	5	85.346
Esg	2	HS	0	HS	60012	Egfr-IR	4	5	205.788
Esg	2	HS	0	HS	60012	Egfr-IR	4	5	124.629
Esg	2	HS	0	HS	60012	Egfr-IR	4	5	173.085
Esg	2	HS	0	HS	60012	Egfr-IR	4	5	90.929
Esg	2	HS	0	HS	60012	Egfr-IR	4	5	99.305
Esg	2	HS	0	HS	60012	Egfr-IR	4	5	96.313
Esg	2	HS	0	HS	60012	Egfr-IR	4	5	123.832
Esg	2	HS	0	HS	60012	Egfr-IR	4	5	175.279
Esg	2	HS	0	HS	60012	Egfr-IR	4	5	87.739
Esg	2	HS	0	HS	60012	Egfr-IR	4	5	122.635
Esg	2	HS	0	HS	60012	Egfr-IR	4	5	62.414
Esg	2	HS	0	HS	60012	Egfr-IR	4	5	83.551
Esg	2	HS	0	HS	60012	Egfr-IR	4	5	88.138
Esg	2	HS	0	HS	60012	Egfr-IR	4	5	106.483
Esg	2	HS	0	HS	60012	Egfr-IR	4	5	97.51
Esg	2	HS	0	HS	60012	Egfr-IR	4	5	92.924
Esg	2	HS	0	HS	60012	Egfr-IR	4	5	158.728
Esg	2	HS	0	HS	60012	Egfr-IR	4	5	129.614
Esg	2	HS	0	HS	60012	Egfr-IR	4	5	158.13
Esg	2	HS	0	HS	60012	Egfr-IR	4	5	108.677
Esg	2	HS	0	HS	60012	Egfr-IR	4	5	145.168
Esg	2	HS	0	HS	60012	Egfr-IR	4	6	162.317
Esg	2	HS	0	HS	60012	Egfr-IR	4	6	145.766
Esg	2	HS	0	HS	60012	Egfr-IR	4	6	164.511
Esg	2	HS	0	HS	60012	Egfr-IR	4	6	78.965
Esg	2	HS	0	HS	60012	Egfr-IR	4	6	82.156
Esg	2	HS	0	HS	60012	Egfr-IR	4	6	97.51
Esg	2	HS	0	HS	60012	Egfr-IR	4	6	109.075
Esg	2	HS	0	HS	60012	Egfr-IR	4	6	142.775
Esg	2	HS	0	HS	60012	Egfr-IR	4	6	158.329
Esg	2	HS	0	HS	60012	Egfr-IR	4	6	98.108
Esg	2	HS	0	HS	60012	Egfr-IR	4	6	149.356
Esg	2	HS	0	HS	60012	Egfr-IR	4	6	111.07
Esg	2	HS	0	HS	60012	Egfr-IR	4	6	134.799
Esg	2	HS	0	HS	60012	Egfr-IR	4	6	215.16
Esg	2	HS	0	HS	60012	Egfr-IR	4	6	241.083
Esg	2	HS	0	HS	60012	Egfr-IR	4	6	153.743
Esg	2	HS	0	HS	60012	Egfr-IR	4	6	98.906
Esg	2	HS	0	HS	60012	Egfr-IR	4	6	76.772
Esg	2	HS	0	HS	60012	Egfr-IR	4	6	93.123
Esg	2	HS	0	HS	60012	Egfr-IR	4	6	73.182
Esg	2	HS	0	HS	60012	Egfr-IR	4	6	100.501
Esg	2	HS	0	HS	60012	Egfr-IR	4	6	72.185
Esg	2	HS	0	HS	60012	Egfr-IR	4	6	110.272
Esg	2	HS	0	HS	60012	Egfr-IR	4	6	55.236
Esg	2	HS	0	HS	60012	Egfr-IR	4	6	72.783
Esg	2	HS	0	HS	60012	Egfr-IR	4	6	100.7
Esg	2	HS	0	HS	60012	Egfr-IR	4	6	93.123
Esg	2	HS	0	HS	60012	Egfr-IR	4	6	97.111
Esg	2	HS	0	HS	60012	Egfr-IR	4	6	93.123
Esg	2	HS	0	HS	60012	Egfr-IR	4	6	116.254
Esg	2	HS	0	HS	60012	Egfr-IR	4	7	77.17
Esg	2	HS	0	HS	60012	Egfr-IR	4	7	95.715
Esg	2	HS	0	HS	60012	Egfr-IR	4	7	105.686
Esg	2	HS	0	HS	60012	Egfr-IR	4	7	104.689
Esg	2	HS	0	HS	60012	Egfr-IR	4	7	120.442
Esg	2	HS	0	HS	60012	Egfr-IR	4	7	103.691
Esg	2	HS	0	HS	60012	Egfr-IR	4	7	124.031
Esg	2	HS	0	HS	60012	Egfr-IR	4	7	87.739
Esg	2	HS	0	HS	60012	Egfr-IR	4	7	112.266
Esg	2	HS	0	HS	60012	Egfr-IR	4	7	135.198
Esg	2	HS	0	HS	60012	Egfr-IR	4	7	143.174
Esg	2	HS	0	HS	60012	Egfr-IR	4	7	92.325
Esg	2	HS	0	HS	60012	Egfr-IR	4	7	86.343
Esg	2	HS	0	HS	60012	Egfr-IR	4	7	85.147
Esg	2	HS	0	HS	60012	Egfr-IR	4	7	108.278
Esg	2	HS	0	HS	60012	Egfr-IR	4	7	110.272
Esg	2	HS	0	HS	60012	Egfr-IR	4	7	109.474
Esg	2	HS	0	HS	60012	Egfr-IR	4	7	106.284
Esg	2	HS	0	HS	60012	Egfr-IR	4	7	72.385
Esg	2	HS	0	HS	60012	Egfr-IR	4	7	93.123
Esg	2	HS	0	HS	60012	Egfr-IR	4	7	77.569
Esg	2	HS	0	HS	60012	Egfr-IR	4	7	63.611
Esg	2	HS	0	HS	60012	Egfr-IR	4	7	121.239
Esg	2	HS	0	HS	60012	Egfr-IR	4	7	101.897
Esg	2	HS	0	HS	60012	Egfr-IR	4	7	96.114
Esg	2	HS	0	HS	60012	Egfr-IR	4	7	53.64
Esg	2	HS	0	HS	60012	Egfr-IR	4	7	174.481
Esg	2	HS	0	HS	60012	Egfr-IR	4	7	119.644
Esg	2	HS	0	HS	60012	Egfr-IR	4	7	88.736
Esg	2	HS	0	HS	60012	Egfr-IR	4	7	108.078
