# Supplementary material for: Multiscale analysis reveals that diet-dependent midgut plasticity emerges from alterations in both stem cell niche coupling and enterocyte size
Source: eLife. 2021 Sep 23;10:e64125. doi: 10.7554/eLife.64125 (PMC8528489; doi:10.7554/eLife.64125)
Supplement: Figure 7—figure supplement 1—source data 1. [file elife-64125-fig7-figsupp1-data1.csv]

Line	Diet	Day	Repeat	GutNumber	Region	Area
CantonS	HY	7	1	1	4	574.291
CantonS	HY	7	1	1	4	365.513
CantonS	HY	7	1	1	4	446.87
CantonS	HY	7	1	1	4	193.026
CantonS	HY	7	1	1	4	186.246
CantonS	HY	7	1	1	4	341.185
CantonS	HY	7	1	1	4	272.589
CantonS	HY	7	1	1	4	255.241
CantonS	HY	7	1	1	4	181.46
CantonS	HY	7	1	1	4	173.683
CantonS	HY	7	1	1	4	149.954
CantonS	HY	7	1	1	4	120.043
CantonS	HY	7	1	1	4	407.587
CantonS	HY	7	1	1	4	443.879
CantonS	HY	7	1	1	4	191.43
CantonS	HY	7	1	1	4	173.683
CantonS	HY	7	1	1	4	246.267
CantonS	HY	7	1	1	4	342.581
CantonS	HY	7	1	1	4	150.751
CantonS	HY	7	1	1	4	261.422
CantonS	HY	7	1	1	4	341.584
CantonS	HY	7	1	1	4	238.092
CantonS	HY	7	1	1	4	256.238
CantonS	HY	7	1	1	4	122.835
CantonS	HY	7	1	1	4	284.952
CantonS	HY	7	1	1	4	134.799
CantonS	HY	7	1	1	4	115.058
CantonS	HY	7	1	1	4	150.353
CantonS	HY	7	1	1	4	140.781
CantonS	HY	7	1	1	4	199.407
CantonS	HY	7	1	1	4	141.778
CantonS	HY	7	1	1	4	278.372
CantonS	HY	7	1	1	4	221.142
CantonS	HY	7	1	1	4	205.588
CantonS	HY	7	1	1	4	335.203
CantonS	HY	7	1	2	4	530.422
CantonS	HY	7	1	2	4	339.59
CantonS	HY	7	1	2	4	335.402
CantonS	HY	7	1	2	4	328.024
CantonS	HY	7	1	2	4	325.432
CantonS	HY	7	1	2	4	338.991
CantonS	HY	7	1	2	4	278.571
CantonS	HY	7	1	2	4	396.819
CantonS	HY	7	1	2	4	352.95
CantonS	HY	7	1	2	4	308.283
CantonS	HY	7	1	2	4	274.583
CantonS	HY	7	1	2	4	275.381
CantonS	HY	7	1	2	4	327.825
CantonS	HY	7	1	2	4	289.539
CantonS	HY	7	1	2	4	214.562
CantonS	HY	7	1	2	4	317.655
CantonS	HY	7	1	2	4	294.723
CantonS	HY	7	1	2	4	260.824
CantonS	HY	7	1	2	4	211.969
CantonS	HY	7	1	2	4	263.616
CantonS	HY	7	1	2	4	244.473
CantonS	HY	7	1	2	4	229.118
CantonS	HY	7	1	2	4	270.994
CantonS	HY	7	1	2	4	219.547
CantonS	HY	7	1	2	4	270.396
CantonS	HY	7	1	2	4	402.403
CantonS	HY	7	1	2	4	418.754
CantonS	HY	7	1	2	4	370.298
CantonS	HY	7	1	2	4	327.825
CantonS	HY	7	1	2	4	309.479
CantonS	HY	7	1	3	4	392.034
CantonS	HY	7	1	3	4	604.601
CantonS	HY	7	1	3	4	264.214
CantonS	HY	7	1	3	4	247.663
CantonS	HY	7	1	3	4	178.469
CantonS	HY	7	1	3	4	278.172
CantonS	HY	7	1	3	4	237.095
CantonS	HY	7	1	3	4	235.898
CantonS	HY	7	1	3	4	156.335
CantonS	HY	7	1	3	4	255.041
CantonS	HY	7	1	3	4	158.728
CantonS	HY	7	1	3	4	126.025
CantonS	HY	7	1	3	4	237.095
CantonS	HY	7	1	3	4	258.032
CantonS	HY	7	1	3	4	305.292
CantonS	HY	7	1	3	4	158.13
CantonS	HY	7	1	3	4	187.642
CantonS	HY	7	1	3	4	174.481
CantonS	HY	7	1	3	4	134.201
CantonS	HY	7	1	3	4	147.362
CantonS	HY	7	1	3	4	186.246
CantonS	HY	7	1	3	4	357.536
CantonS	HY	7	1	3	4	152.945
CantonS	HY	7	1	3	4	146.365
CantonS	HY	7	1	3	4	339.39
CantonS	HY	7	1	3	4	223.734
CantonS	HY	7	1	3	4	85.545
CantonS	HY	7	1	3	4	244.672
CantonS	HY	7	1	3	4	289.339
CantonS	HY	7	1	3	4	181.061
CantonS	HY	7	1	4	4	399.013
CantonS	HY	7	1	4	4	332.212
CantonS	HY	7	1	4	4	470.4
CantonS	HY	7	1	4	4	299.708
CantonS	HY	7	1	4	4	420.948
CantonS	HY	7	1	4	4	421.346
CantonS	HY	7	1	4	4	461.826
CantonS	HY	7	1	4	4	722.052
CantonS	HY	7	1	4	4	372.093
CantonS	HY	7	1	4	4	368.105
CantonS	HY	7	1	4	4	339.789
CantonS	HY	7	1	4	4	473.192
CantonS	HY	7	1	4	4	314.265
CantonS	HY	7	1	4	4	324.634
CantonS	HY	7	1	4	4	297.914
CantonS	HY	7	1	4	4	320.048
CantonS	HY	7	1	4	4	210.175
CantonS	HY	7	1	4	4	318.253
CantonS	HY	7	1	4	4	334.405
CantonS	HY	7	1	4	4	332.212
CantonS	HY	7	1	4	4	314.066
CantonS	HY	7	1	4	4	434.308
CantonS	HY	7	1	4	4	532.217
CantonS	HY	7	1	4	4	387.647
CantonS	HY	7	1	4	4	451.457
CantonS	HY	7	1	4	4	275.381
CantonS	HY	7	1	4	4	329.221
CantonS	HY	7	1	4	4	442.683
CantonS	HY	7	1	4	4	279.369
CantonS	HY	7	1	4	4	324.235
CantonS	HY	7	1	5	4	467.409
CantonS	HY	7	1	5	4	169.097
CantonS	HY	7	1	5	4	291.134
CantonS	HY	7	1	5	4	248.461
CantonS	HY	7	1	5	4	194.222
CantonS	HY	7	1	5	4	159.725
CantonS	HY	7	1	5	4	427.329
CantonS	HY	7	1	5	4	295.521
CantonS	HY	7	1	5	4	303.098
CantonS	HY	7	1	5	4	434.108
CantonS	HY	7	1	5	4	277.375
CantonS	HY	7	1	5	4	268.202
CantonS	HY	7	1	5	4	393.23
CantonS	HY	7	1	5	4	267.404
CantonS	HY	7	1	5	4	179.665
CantonS	HY	7	1	5	4	438.495
CantonS	HY	7	1	5	4	412.373
CantonS	HY	7	1	5	4	251.053
CantonS	HY	7	1	5	4	334.006
CantonS	HY	7	1	5	4	354.346
CantonS	HY	7	1	5	4	225.13
CantonS	HY	7	1	5	4	385.453
CantonS	HY	7	1	5	4	314.464
CantonS	HY	7	1	5	4	414.965
CantonS	HY	7	1	5	4	297.714
CantonS	HY	7	1	5	4	248.261
CantonS	HY	7	1	5	4	328.822
CantonS	HY	7	1	5	4	235.101
CantonS	HY	7	1	5	4	334.804
CantonS	HY	7	1	5	4	301.902
CantonS	HY	7	1	6	4	374.685
CantonS	HY	7	1	6	4	408.983
CantonS	HY	7	1	6	4	259.628
CantonS	HY	7	1	6	4	310.476
CantonS	HY	7	1	6	4	397.418
CantonS	HY	7	1	6	4	316.06
CantonS	HY	7	1	6	4	337.596
CantonS	HY	7	1	6	4	384.656
CantonS	HY	7	1	6	4	398.415
CantonS	HY	7	1	6	4	296.119
CantonS	HY	7	1	6	4	184.252
CantonS	HY	7	1	6	4	316.06
CantonS	HY	7	1	6	4	282.958
CantonS	HY	7	1	6	4	279.568
CantonS	HY	7	1	6	4	269.797
CantonS	HY	7	1	6	4	204.591
CantonS	HY	7	1	6	4	226.725
CantonS	HY	7	1	6	4	328.024
CantonS	HY	7	1	6	4	164.909
CantonS	HY	7	1	6	4	291.533
CantonS	HY	7	1	6	4	198.609
CantonS	HY	7	1	6	4	297.515
CantonS	HY	7	1	6	4	136.594
CantonS	HY	7	1	6	4	202.198
CantonS	HY	7	1	6	4	264.214
CantonS	HY	7	1	6	4	236.098
CantonS	HY	7	1	6	4	332.212
CantonS	HY	7	1	6	4	331.414
CantonS	HY	7	1	6	4	304.893
CantonS	HY	7	1	6	4	444.278
CantonS	HY	7	1	7	4	441.486
CantonS	HY	7	1	7	4	365.513
CantonS	HY	7	1	7	4	265.012
CantonS	HY	7	1	7	4	463.621
CantonS	HY	7	1	7	4	328.223
CantonS	HY	7	1	7	4	358.733
CantonS	HY	7	1	7	4	469.603
CantonS	HY	7	1	7	4	239.089
CantonS	HY	7	1	7	4	439.094
CantonS	HY	7	1	7	4	450.26
CantonS	HY	7	1	7	4	390.239
CantonS	HY	7	1	7	4	368.703
CantonS	HY	7	1	7	4	322.441
CantonS	HY	7	1	7	4	314.066
CantonS	HY	7	1	7	4	292.131
CantonS	HY	7	1	7	4	521.648
CantonS	HY	7	1	7	4	659.039
CantonS	HY	7	1	7	4	294.324
CantonS	HY	7	1	7	4	287.943
CantonS	HY	7	1	7	4	278.372
CantonS	HY	7	1	7	4	239.487
CantonS	HY	7	1	7	4	388.444
CantonS	HY	7	1	7	4	309.28
CantonS	HY	7	1	7	4	252.648
CantonS	HY	7	1	7	4	295.321
CantonS	HY	7	1	7	4	335.003
CantonS	HY	7	1	7	4	225.33
CantonS	HY	7	1	7	4	201.8
CantonS	HY	7	1	7	4	206.585
CantonS	HY	7	1	7	4	299.309
CantonS	HY	7	1	8	4	483.96
CantonS	HY	7	1	8	4	281.961
CantonS	HY	7	1	8	4	160.921
CantonS	HY	7	1	8	4	403.599
CantonS	HY	7	1	8	4	463.82
CantonS	HY	7	1	8	4	401.406
CantonS	HY	7	1	8	4	647.673
CantonS	HY	7	1	8	4	432.114
CantonS	HY	7	1	8	4	221.142
CantonS	HY	7	1	8	4	356.739
CantonS	HY	7	1	8	4	558.738
CantonS	HY	7	1	8	4	299.708
CantonS	HY	7	1	8	4	277.774
CantonS	HY	7	1	8	4	311.673
CantonS	HY	7	1	8	4	235.499
CantonS	HY	7	1	8	4	388.644
CantonS	HY	7	1	8	4	256.836
CantonS	HY	7	1	8	4	368.902
CantonS	HY	7	1	8	4	208.779
CantonS	HY	7	1	8	4	218.749
CantonS	HY	7	1	8	4	355.941
CantonS	HY	7	1	8	4	332.81
CantonS	HY	7	1	8	4	191.63
CantonS	HY	7	1	8	4	386.251
CantonS	HY	7	1	8	4	310.077
CantonS	HY	7	1	8	4	408.385
CantonS	HY	7	1	8	4	177.073
CantonS	HY	7	1	8	4	262.22
CantonS	HY	7	1	8	4	535.806
CantonS	HY	7	1	8	4	326.628
CantonS	HY	7	1	9	4	508.687
CantonS	HY	7	1	9	4	141.579
CantonS	HY	7	1	9	4	194.422
CantonS	HY	7	1	9	4	264.413
CantonS	HY	7	1	9	4	279.369
CantonS	HY	7	1	9	4	294.524
CantonS	HY	7	1	9	4	189.038
CantonS	HY	7	1	9	4	200.005
CantonS	HY	7	1	9	4	165.308
CantonS	HY	7	1	9	4	134.001
CantonS	HY	7	1	9	4	400.01
CantonS	HY	7	1	9	4	141.18
CantonS	HY	7	1	9	4	413.968
CantonS	HY	7	1	9	4	124.829
CantonS	HY	7	1	9	4	356.938
CantonS	HY	7	1	9	4	309.878
CantonS	HY	7	1	9	4	203.195
CantonS	HY	7	1	9	4	301.503
CantonS	HY	7	1	9	4	358.932
CantonS	HY	7	1	9	4	351.753
CantonS	HY	7	1	9	4	366.111
CantonS	HY	7	1	9	4	227.922
CantonS	HY	7	1	9	4	570.503
CantonS	HY	7	1	9	4	258.032
CantonS	HY	7	1	9	4	278.571
CantonS	HY	7	1	9	4	308.881
CantonS	HY	7	1	9	4	163.912
CantonS	HY	7	1	9	4	127.62
CantonS	HY	7	1	9	4	104.09
CantonS	HY	7	1	9	4	156.933
CantonS	HY	7	1	9	4	232.309
CantonS	HY	7	2	1	4	377.278
CantonS	HY	7	2	1	4	290.137
CantonS	HY	7	2	1	4	363.319
CantonS	HY	7	2	1	4	314.066
CantonS	HY	7	2	1	4	337.795
CantonS	HY	7	2	1	4	282.759
CantonS	HY	7	2	1	4	325.831
CantonS	HY	7	2	1	4	299.309
CantonS	HY	7	2	1	4	470.6
CantonS	HY	7	2	1	4	397.816
CantonS	HY	7	2	1	4	484.558
CantonS	HY	7	2	1	4	154.939
CantonS	HY	7	2	1	4	451.457
CantonS	HY	7	2	1	4	214.362
CantonS	HY	7	2	1	4	357.137
CantonS	HY	7	2	1	4	388.245
CantonS	HY	7	2	1	4	245.47
CantonS	HY	7	2	1	4	274.583
CantonS	HY	7	2	1	4	465.016
CantonS	HY	7	2	1	4	312.072
CantonS	HY	7	2	1	4	424.736
CantonS	HY	7	2	1	4	241.282
CantonS	HY	7	2	1	4	257.833
CantonS	HY	7	2	1	4	394.427
CantonS	HY	7	2	1	4	206.585
CantonS	HY	7	2	1	4	291.732
CantonS	HY	7	2	1	4	488.347
CantonS	HY	7	2	1	4	261.422
CantonS	HY	7	2	1	4	424.936
CantonS	HY	7	2	1	4	319.25
CantonS	HY	7	2	2	4	356.539
CantonS	HY	7	2	2	4	356.739
CantonS	HY	7	2	2	4	322.042
CantonS	HY	7	2	2	4	327.226
CantonS	HY	7	2	2	4	397.617
CantonS	HY	7	2	2	4	229.517
CantonS	HY	7	2	2	4	228.52
CantonS	HY	7	2	2	4	268.8
CantonS	HY	7	2	2	4	193.823
CantonS	HY	7	2	2	4	303.298
CantonS	HY	7	2	2	4	228.919
CantonS	HY	7	2	2	4	287.744
CantonS	HY	7	2	2	4	280.565
CantonS	HY	7	2	2	4	339.39
CantonS	HY	7	2	2	4	371.894
CantonS	HY	7	2	2	4	253.047
CantonS	HY	7	2	2	4	212.966
CantonS	HY	7	2	2	4	426.93
CantonS	HY	7	2	2	4	273.785
CantonS	HY	7	2	2	4	436.501
CantonS	HY	7	2	2	4	421.147
CantonS	HY	7	2	2	4	279.169
CantonS	HY	7	2	2	4	255.44
CantonS	HY	7	2	2	4	354.944
CantonS	HY	7	2	2	4	292.131
CantonS	HY	7	2	2	4	295.122
CantonS	HY	7	2	2	4	322.839
CantonS	HY	7	2	2	4	315.661
CantonS	HY	7	2	2	4	261.023
CantonS	HY	7	2	2	4	259.428
CantonS	HY	7	2	2	4	336.798
CantonS	HY	7	2	2	4	477.779
CantonS	HY	7	2	2	4	236.098
CantonS	HY	7	2	2	4	368.703
CantonS	HY	7	2	2	4	377.278
CantonS	HY	7	2	3	4	353.947
CantonS	HY	7	2	3	4	456.841
CantonS	HY	7	2	3	4	176.674
CantonS	HY	7	2	3	4	371.495
CantonS	HY	7	2	3	4	304.494
CantonS	HY	7	2	3	4	235.3
CantonS	HY	7	2	3	4	316.06
CantonS	HY	7	2	3	4	267.205
CantonS	HY	7	2	3	4	311.872
CantonS	HY	7	2	3	4	233.106
CantonS	HY	7	2	3	4	285.55
CantonS	HY	7	2	3	4	296.518
CantonS	HY	7	2	3	4	266.009
CantonS	HY	7	2	3	4	242.279
CantonS	HY	7	2	3	4	288.342
CantonS	HY	7	2	3	4	352.95
CantonS	HY	7	2	3	4	190.832
CantonS	HY	7	2	3	4	283.955
CantonS	HY	7	2	3	4	107.48
CantonS	HY	7	2	3	4	438.894
CantonS	HY	7	2	3	4	258.83
CantonS	HY	7	2	3	4	323.039
CantonS	HY	7	2	3	4	407.787
CantonS	HY	7	2	3	4	264.613
CantonS	HY	7	2	3	4	401.007
CantonS	HY	7	2	3	4	370.498
CantonS	HY	7	2	3	4	188.439
CantonS	HY	7	2	3	4	248.66
CantonS	HY	7	2	3	4	299.708
CantonS	HY	7	2	3	4	329.819
CantonS	HY	7	2	3	4	142.975
CantonS	HY	7	2	4	4	274.583
CantonS	HY	7	2	4	4	251.651
CantonS	HY	7	2	4	4	277.375
CantonS	HY	7	2	4	4	342.581
CantonS	HY	7	2	4	4	246.666
CantonS	HY	7	2	4	4	207.582
CantonS	HY	7	2	4	4	306.488
CantonS	HY	7	2	4	4	300.905
CantonS	HY	7	2	4	4	265.41
CantonS	HY	7	2	4	4	199.407
CantonS	HY	7	2	4	4	260.425
CantonS	HY	7	2	4	4	187.442
CantonS	HY	7	2	4	4	92.924
CantonS	HY	7	2	4	4	181.859
CantonS	HY	7	2	4	4	255.241
CantonS	HY	7	2	4	4	230.315
CantonS	HY	7	2	4	4	270.396
CantonS	HY	7	2	4	4	178.868
CantonS	HY	7	2	4	4	219.148
CantonS	HY	7	2	4	4	219.547
CantonS	HY	7	2	4	4	278.97
CantonS	HY	7	2	4	4	408.385
CantonS	HY	7	2	4	4	263.815
CantonS	HY	7	2	4	4	311.074
CantonS	HY	7	2	4	4	414.367
CantonS	HY	7	2	4	4	222.937
CantonS	HY	7	2	4	4	197.213
CantonS	HY	7	2	4	4	308.083
CantonS	HY	7	2	4	4	201.8
CantonS	HY	7	2	4	4	260.226
CantonS	HY	7	2	5	4	263.217
CantonS	HY	7	2	5	4	347.566
CantonS	HY	7	2	5	4	283.955
CantonS	HY	7	2	5	4	328.223
CantonS	HY	7	2	5	4	342.78
CantonS	HY	7	2	5	4	348.563
CantonS	HY	7	2	5	4	339.988
CantonS	HY	7	2	5	4	293.726
CantonS	HY	7	2	5	4	385.852
CantonS	HY	7	2	5	4	279.169
CantonS	HY	7	2	5	4	187.442
CantonS	HY	7	2	5	4	171.29
CantonS	HY	7	2	5	4	205.19
CantonS	HY	7	2	5	4	207.582
CantonS	HY	7	2	5	4	254.044
CantonS	HY	7	2	5	4	258.431
CantonS	HY	7	2	5	4	464.618
CantonS	HY	7	2	5	4	192.029
CantonS	HY	7	2	5	4	341.983
CantonS	HY	7	2	5	4	278.97
CantonS	HY	7	2	5	4	169.296
CantonS	HY	7	2	5	4	291.732
CantonS	HY	7	2	5	4	359.53
CantonS	HY	7	2	5	4	156.933
CantonS	HY	7	2	5	4	228.121
CantonS	HY	7	2	5	4	141.778
CantonS	HY	7	2	5	4	181.061
CantonS	HY	7	2	5	4	288.741
CantonS	HY	7	2	5	4	184.252
CantonS	HY	7	2	5	4	162.716
CantonS	HY	7	2	6	4	440.888
CantonS	HY	7	2	6	4	316.458
CantonS	HY	7	2	6	4	152.546
CantonS	HY	7	2	6	4	260.625
CantonS	HY	7	2	6	4	204.392
CantonS	HY	7	2	6	4	291.931
CantonS	HY	7	2	6	4	113.263
CantonS	HY	7	2	6	4	219.148
CantonS	HY	7	2	6	4	195.419
CantonS	HY	7	2	6	4	171.889
CantonS	HY	7	2	6	4	259.229
CantonS	HY	7	2	6	4	279.568
CantonS	HY	7	2	6	4	174.481
CantonS	HY	7	2	6	4	263.416
CantonS	HY	7	2	6	4	229.318
CantonS	HY	7	2	6	4	195.219
CantonS	HY	7	2	6	4	283.556
CantonS	HY	7	2	6	4	267.803
CantonS	HY	7	2	6	4	270.396
CantonS	HY	7	2	6	4	323.637
CantonS	HY	7	2	6	4	395.025
CantonS	HY	7	2	6	4	265.012
CantonS	HY	7	2	6	4	272.39
CantonS	HY	7	2	6	4	595.03
CantonS	HY	7	2	6	4	336
CantonS	HY	7	2	6	4	203.594
CantonS	HY	7	2	6	4	167.302
CantonS	HY	7	2	6	4	358.932
CantonS	HY	7	2	6	4	232.708
CantonS	HY	7	2	6	4	246.467
CantonS	HY	7	2	7	4	448.665
CantonS	HY	7	2	7	4	214.96
CantonS	HY	7	2	7	4	273.985
CantonS	HY	7	2	7	4	314.863
CantonS	HY	7	2	7	4	398.813
CantonS	HY	7	2	7	4	425.733
CantonS	HY	7	2	7	4	184.451
CantonS	HY	7	2	7	4	193.624
CantonS	HY	7	2	7	4	206.187
CantonS	HY	7	2	7	4	216.955
CantonS	HY	7	2	7	4	461.627
CantonS	HY	7	2	7	4	310.277
CantonS	HY	7	2	7	4	452.055
CantonS	HY	7	2	7	4	309.679
CantonS	HY	7	2	7	4	365.712
CantonS	HY	7	2	7	4	352.95
CantonS	HY	7	2	7	4	300.905
CantonS	HY	7	2	7	4	304.095
CantonS	HY	7	2	7	4	319.649
CantonS	HY	7	2	7	4	392.632
CantonS	HY	7	2	7	4	317.057
CantonS	HY	7	2	7	4	290.536
CantonS	HY	7	2	7	4	311.872
CantonS	HY	7	2	7	4	196.814
CantonS	HY	7	2	7	4	262.619
CantonS	HY	7	2	7	4	328.423
CantonS	HY	7	2	7	4	313.866
CantonS	HY	7	2	7	4	266.806
CantonS	HY	7	2	7	4	353.548
CantonS	HY	7	2	8	4	431.516
CantonS	HY	7	2	8	4	242.678
CantonS	HY	7	2	8	4	373.688
CantonS	HY	7	2	8	4	162.915
CantonS	HY	7	2	8	4	233.904
CantonS	HY	7	2	8	4	190.433
CantonS	HY	7	2	8	4	155.138
CantonS	HY	7	2	8	4	136.992
CantonS	HY	7	2	8	4	239.089
CantonS	HY	7	2	8	4	241.282
CantonS	HY	7	2	8	4	280.964
CantonS	HY	7	2	8	4	164.511
CantonS	HY	7	2	8	4	378.474
CantonS	HY	7	2	8	4	316.259
CantonS	HY	7	2	8	4	300.307
CantonS	HY	7	2	8	4	332.212
CantonS	HY	7	2	8	4	137.591
CantonS	HY	7	2	8	4	219.746
CantonS	HY	7	2	8	4	354.745
CantonS	HY	7	2	8	4	181.261
CantonS	HY	7	2	8	4	166.903
CantonS	HY	7	2	8	4	186.246
CantonS	HY	7	2	8	4	163.713
CantonS	HY	7	2	8	4	294.723
CantonS	HY	7	2	8	4	141.978
CantonS	HY	7	2	8	4	164.511
CantonS	HY	7	2	8	4	182.457
CantonS	HY	7	2	8	4	191.032
CantonS	HY	7	2	8	4	233.306
CantonS	HY	7	2	8	4	407.787
CantonS	HY	7	2	8	4	152.945
CantonS	HY	7	2	9	4	354.545
CantonS	HY	7	2	9	4	391.037
CantonS	HY	7	2	9	4	520.252
CantonS	HY	7	2	9	4	416.959
CantonS	HY	7	2	9	4	386.45
CantonS	HY	7	2	9	4	363.319
CantonS	HY	7	2	9	4	465.615
CantonS	HY	7	2	9	4	306.089
CantonS	HY	7	2	9	4	392.632
CantonS	HY	7	2	9	4	310.077
CantonS	HY	7	2	9	4	230.115
CantonS	HY	7	2	9	4	363.917
CantonS	HY	7	2	9	4	388.644
CantonS	HY	7	2	9	4	323.238
CantonS	HY	7	2	9	4	335.801
CantonS	HY	7	2	9	4	376.28
CantonS	HY	7	2	9	4	464.618
CantonS	HY	7	2	9	4	336.798
CantonS	HY	7	2	9	4	196.615
CantonS	HY	7	2	9	4	189.237
CantonS	HY	7	2	9	4	223.734
CantonS	HY	7	2	9	4	322.241
CantonS	HY	7	2	9	4	365.712
CantonS	HY	7	2	9	4	273.985
CantonS	HY	7	2	9	4	272.39
CantonS	HY	7	2	9	4	250.056
CantonS	HY	7	2	9	4	223.734
CantonS	HY	7	2	9	4	422.144
CantonS	HY	7	2	9	4	376.879
CantonS	HY	7	2	9	4	234.103
CantonS	HY	7	2	9	4	265.61
CantonS	HY	7	2	9	4	274.583
CantonS	HY	7	2	9	4	411.775
CantonS	HY	7	2	9	4	262.22
CantonS	HY	7	2	9	4	299.509
CantonS	HY	7	2	10	4	344.974
CantonS	HY	7	2	10	4	463.621
CantonS	HY	7	2	10	4	478.576
CantonS	HY	7	2	10	4	356.14
CantonS	HY	7	2	10	4	362.721
CantonS	HY	7	2	10	4	417.957
CantonS	HY	7	2	10	4	508.088
CantonS	HY	7	2	10	4	415.564
CantonS	HY	7	2	10	4	360.926
CantonS	HY	7	2	10	4	382.263
CantonS	HY	7	2	10	4	468.008
CantonS	HY	7	2	10	4	567.312
CantonS	HY	7	2	10	4	770.707
CantonS	HY	7	2	10	4	402.602
CantonS	HY	7	2	10	4	439.692
CantonS	HY	7	2	10	4	421.945
CantonS	HY	7	2	10	4	562.925
CantonS	HY	7	2	10	4	370.298
CantonS	HY	7	2	10	4	433.909
CantonS	HY	7	2	10	4	615.569
CantonS	HY	7	2	10	4	440.29
CantonS	HY	7	2	10	4	599.815
CantonS	HY	7	2	10	4	394.427
CantonS	HY	7	2	10	4	353.349
CantonS	HY	7	2	10	4	410.778
CantonS	HY	7	2	10	4	422.942
CantonS	HY	7	2	10	4	431.716
CantonS	HY	7	2	10	4	648.271
CantonS	HY	7	2	10	4	354.944
CantonS	HY	7	2	10	4	499.713
CantonS	HY	7	3	1	4	322.441
CantonS	HY	7	3	1	4	345.572
CantonS	HY	7	3	1	4	321.842
CantonS	HY	7	3	1	4	424.936
CantonS	HY	7	3	1	4	344.375
CantonS	HY	7	3	1	4	301.503
CantonS	HY	7	3	1	4	333.607
CantonS	HY	7	3	1	4	250.854
CantonS	HY	7	3	1	4	371.495
CantonS	HY	7	3	1	4	298.911
CantonS	HY	7	3	1	4	258.232
CantonS	HY	7	3	1	4	273.387
CantonS	HY	7	3	1	4	312.67
CantonS	HY	7	3	1	4	194.621
CantonS	HY	7	3	1	4	266.208
CantonS	HY	7	3	1	4	322.64
CantonS	HY	7	3	1	4	295.122
CantonS	HY	7	3	1	4	300.307
CantonS	HY	7	3	1	4	347.965
CantonS	HY	7	3	1	4	226.725
CantonS	HY	7	3	1	4	445.674
CantonS	HY	7	3	1	4	301.304
CantonS	HY	7	3	1	4	304.095
CantonS	HY	7	3	1	4	303.696
CantonS	HY	7	3	1	4	291.732
CantonS	HY	7	3	1	4	364.316
CantonS	HY	7	3	1	4	300.905
CantonS	HY	7	3	1	4	381.465
CantonS	HY	7	3	1	4	402.004
CantonS	HY	7	3	1	4	217.154
CantonS	HY	7	3	2	4	362.322
CantonS	HY	7	3	2	4	277.175
CantonS	HY	7	3	2	4	230.115
CantonS	HY	7	3	2	4	201.002
CantonS	HY	7	3	2	4	201.401
CantonS	HY	7	3	2	4	185.847
CantonS	HY	7	3	2	4	211.77
CantonS	HY	7	3	2	4	320.247
CantonS	HY	7	3	2	4	248.062
CantonS	HY	7	3	2	4	218.151
CantonS	HY	7	3	2	4	341.384
CantonS	HY	7	3	2	4	240.684
CantonS	HY	7	3	2	4	223.136
CantonS	HY	7	3	2	4	179.466
CantonS	HY	7	3	2	4	187.243
CantonS	HY	7	3	2	4	286.348
CantonS	HY	7	3	2	4	286.946
CantonS	HY	7	3	2	4	233.505
CantonS	HY	7	3	2	4	240.883
CantonS	HY	7	3	2	4	203.993
CantonS	HY	7	3	2	4	333.408
CantonS	HY	7	3	2	4	340.986
CantonS	HY	7	3	2	4	329.819
CantonS	HY	7	3	2	4	332.212
CantonS	HY	7	3	2	4	329.819
CantonS	HY	7	3	2	4	286.747
CantonS	HY	7	3	2	4	254.044
CantonS	HY	7	3	2	4	333.807
CantonS	HY	7	3	2	4	262.22
CantonS	HY	7	3	2	4	380.667
CantonS	HY	7	3	2	4	354.346
CantonS	HY	7	3	2	4	300.905
CantonS	HY	7	3	2	4	449.263
CantonS	HY	7	3	3	4	312.869
CantonS	HY	7	3	3	4	287.345
CantonS	HY	7	3	3	4	216.755
CantonS	HY	7	3	3	4	191.829
CantonS	HY	7	3	3	4	400.808
CantonS	HY	7	3	3	4	371.096
CantonS	HY	7	3	3	4	193.823
CantonS	HY	7	3	3	4	366.111
CantonS	HY	7	3	3	4	245.071
CantonS	HY	7	3	3	4	256.636
CantonS	HY	7	3	3	4	347.367
CantonS	HY	7	3	3	4	213.365
CantonS	HY	7	3	3	4	189.038
CantonS	HY	7	3	3	4	226.327
CantonS	HY	7	3	3	4	289.14
CantonS	HY	7	3	3	4	319.848
CantonS	HY	7	3	3	4	208.579
CantonS	HY	7	3	3	4	371.495
CantonS	HY	7	3	3	4	211.371
CantonS	HY	7	3	3	4	437.897
CantonS	HY	7	3	3	4	233.106
CantonS	HY	7	3	3	4	301.304
CantonS	HY	7	3	3	4	384.456
CantonS	HY	7	3	3	4	284.354
CantonS	HY	7	3	3	4	256.636
CantonS	HY	7	3	3	4	278.771
CantonS	HY	7	3	3	4	187.044
CantonS	HY	7	3	3	4	249.657
CantonS	HY	7	3	3	4	211.571
CantonS	HY	7	3	3	4	208.779
CantonS	HY	7	3	3	4	157.332
CantonS	HY	7	3	4	4	267.205
CantonS	HY	7	3	4	4	215.359
CantonS	HY	7	3	4	4	203.395
CantonS	HY	7	3	4	4	229.717
CantonS	HY	7	3	4	4	199.606
CantonS	HY	7	3	4	4	182.058
CantonS	HY	7	3	4	4	271.393
CantonS	HY	7	3	4	4	249.059
CantonS	HY	7	3	4	4	218.35
CantonS	HY	7	3	4	4	253.845
CantonS	HY	7	3	4	4	246.666
CantonS	HY	7	3	4	4	232.708
CantonS	HY	7	3	4	4	231.511
CantonS	HY	7	3	4	4	248.461
CantonS	HY	7	3	4	4	244.672
CantonS	HY	7	3	4	4	427.528
CantonS	HY	7	3	4	4	244.672
CantonS	HY	7	3	4	4	313.667
CantonS	HY	7	3	4	4	288.143
CantonS	HY	7	3	4	4	336
CantonS	HY	7	3	4	4	339.789
CantonS	HY	7	3	4	4	284.952
CantonS	HY	7	3	4	4	405.793
CantonS	HY	7	3	4	4	385.054
CantonS	HY	7	3	4	4	300.506
CantonS	HY	7	3	4	4	158.927
CantonS	HY	7	3	4	4	222.339
CantonS	HY	7	3	4	4	286.946
CantonS	HY	7	3	4	4	194.422
CantonS	HY	7	3	4	4	224.931
CantonS	HY	7	3	4	4	251.053
CantonS	HY	7	3	5	4	382.861
CantonS	HY	7	3	5	4	387.248
CantonS	HY	7	3	5	4	530.821
CantonS	HY	7	3	5	4	391.236
CantonS	HY	7	3	5	4	426.132
CantonS	HY	7	3	5	4	361.524
CantonS	HY	7	3	5	4	262.02
CantonS	HY	7	3	5	4	389.043
CantonS	HY	7	3	5	4	557.142
CantonS	HY	7	3	5	4	312.47
CantonS	HY	7	3	5	4	285.75
CantonS	HY	7	3	5	4	295.521
CantonS	HY	7	3	5	4	504.898
CantonS	HY	7	3	5	4	259.428
CantonS	HY	7	3	5	4	384.656
CantonS	HY	7	3	5	4	389.641
CantonS	HY	7	3	5	4	251.651
CantonS	HY	7	3	5	4	305.89
CantonS	HY	7	3	5	4	427.927
CantonS	HY	7	3	5	4	386.45
CantonS	HY	7	3	5	4	286.547
CantonS	HY	7	3	5	4	433.71
CantonS	HY	7	3	5	4	278.571
CantonS	HY	7	3	5	4	311.872
CantonS	HY	7	3	5	4	330.816
CantonS	HY	7	3	5	4	252.848
CantonS	HY	7	3	5	4	419.552
CantonS	HY	7	3	5	4	298.711
CantonS	HY	7	3	5	4	214.562
CantonS	HY	7	3	5	4	289.14
CantonS	HY	7	3	6	4	1073.805
CantonS	HY	7	3	6	4	464.019
CantonS	HY	7	3	6	4	550.961
CantonS	HY	7	3	6	4	274.782
CantonS	HY	7	3	6	4	475.784
CantonS	HY	7	3	6	4	611.78
CantonS	HY	7	3	6	4	734.216
CantonS	HY	7	3	6	4	325.831
CantonS	HY	7	3	6	4	411.974
CantonS	HY	7	3	6	4	1163.538
CantonS	HY	7	3	6	4	548.169
CantonS	HY	7	3	6	4	456.243
CantonS	HY	7	3	6	4	454.847
CantonS	HY	7	3	6	4	435.305
CantonS	HY	7	3	6	4	467.808
CantonS	HY	7	3	6	4	471.796
CantonS	HY	7	3	6	4	602.607
CantonS	HY	7	3	6	4	359.331
CantonS	HY	7	3	6	4	189.038
CantonS	HY	7	3	6	4	268.202
CantonS	HY	7	3	6	4	244.074
CantonS	HY	7	3	6	4	389.641
CantonS	HY	7	3	6	4	591.64
CantonS	HY	7	3	6	4	297.315
CantonS	HY	7	3	6	4	398.813
CantonS	HY	7	3	6	4	299.908
CantonS	HY	7	3	6	4	439.094
CantonS	HY	7	3	6	4	540.592
CantonS	HY	7	3	6	4	467.21
CantonS	HY	7	3	6	4	631.92
CantonS	HY	7	3	7	4	363.319
CantonS	HY	7	3	7	4	271.393
CantonS	HY	7	3	7	4	232.309
CantonS	HY	7	3	7	4	230.514
CantonS	HY	7	3	7	4	210.574
CantonS	HY	7	3	7	4	272.589
CantonS	HY	7	3	7	4	167.502
CantonS	HY	7	3	7	4	225.33
CantonS	HY	7	3	7	4	280.166
CantonS	HY	7	3	7	4	226.127
CantonS	HY	7	3	7	4	231.511
CantonS	HY	7	3	7	4	254.044
CantonS	HY	7	3	7	4	250.255
CantonS	HY	7	3	7	4	282.36
CantonS	HY	7	3	7	4	207.582
CantonS	HY	7	3	7	4	168.1
CantonS	HY	7	3	7	4	313.667
CantonS	HY	7	3	7	4	341.783
CantonS	HY	7	3	7	4	203.594
CantonS	HY	7	3	7	4	184.651
CantonS	HY	7	3	7	4	135.995
CantonS	HY	7	3	7	4	219.946
CantonS	HY	7	3	7	4	179.665
CantonS	HY	7	3	7	4	288.741
CantonS	HY	7	3	7	4	283.357
CantonS	HY	7	3	7	4	207.184
CantonS	HY	7	3	7	4	205.588
CantonS	HY	7	3	7	4	254.642
CantonS	HY	7	3	7	4	269.398
CantonS	HY	7	3	7	4	373.09
CantonS	HY	7	3	7	4	254.443
CantonS	HY	7	3	7	4	289.14
CantonS	HY	7	3	7	4	211.172
CantonS	HY	7	3	7	4	207.383
CantonS	HY	7	3	7	4	239.288
CantonS	HY	7	3	7	4	214.163
CantonS	HY	7	3	7	4	269.797
CantonS	HY	7	3	8	4	356.14
CantonS	HY	7	3	8	4	327.825
CantonS	HY	7	3	8	4	336.599
CantonS	HY	7	3	8	4	245.669
CantonS	HY	7	3	8	4	121.638
CantonS	HY	7	3	8	4	439.891
CantonS	HY	7	3	8	4	103.293
CantonS	HY	7	3	8	4	198.21
CantonS	HY	7	3	8	4	221.74
CantonS	HY	7	3	8	4	288.143
CantonS	HY	7	3	8	4	262.22
CantonS	HY	7	3	8	4	210.773
CantonS	HY	7	3	8	4	137.391
CantonS	HY	7	3	8	4	217.752
CantonS	HY	7	3	8	4	197.213
CantonS	HY	7	3	8	4	219.946
CantonS	HY	7	3	8	4	113.462
CantonS	HY	7	3	8	4	358.334
CantonS	HY	7	3	8	4	130.013
CantonS	HY	7	3	8	4	493.332
CantonS	HY	7	3	8	4	134.201
CantonS	HY	7	3	8	4	265.809
CantonS	HY	7	3	8	4	191.829
CantonS	HY	7	3	8	4	202.996
CantonS	HY	7	3	8	4	379.272
CantonS	HY	7	3	8	4	250.654
CantonS	HY	7	3	8	4	192.029
CantonS	HY	7	3	8	4	226.327
CantonS	HY	7	3	8	4	253.247
CantonS	HY	7	3	8	4	132.805
CantonS	HY	7	3	8	4	168.499
CantonS	HY	7	3	8	4	420.15
CantonS	HY	7	3	9	4	456.442
CantonS	HY	7	3	9	4	481.567
CantonS	HY	7	3	9	4	396.421
CantonS	HY	7	3	9	4	421.346
CantonS	HY	7	3	9	4	363.718
CantonS	HY	7	3	9	4	309.479
CantonS	HY	7	3	9	4	379.67
CantonS	HY	7	3	9	4	396.819
CantonS	HY	7	3	9	4	334.006
CantonS	HY	7	3	9	4	561.33
CantonS	HY	7	3	9	4	306.289
CantonS	HY	7	3	9	4	413.37
CantonS	HY	7	3	9	4	327.625
CantonS	HY	7	3	9	4	358.134
CantonS	HY	7	3	9	4	274.982
CantonS	HY	7	3	9	4	280.565
CantonS	HY	7	3	9	4	262.818
CantonS	HY	7	3	9	4	259.029
CantonS	HY	7	3	9	4	361.325
CantonS	HY	7	3	9	4	371.096
CantonS	HY	7	3	9	4	189.038
CantonS	HY	7	3	9	4	195.02
CantonS	HY	7	3	9	4	278.771
CantonS	HY	7	3	9	4	189.436
CantonS	HY	7	3	9	4	201.201
CantonS	HY	7	3	9	4	183.853
CantonS	HY	7	3	9	4	178.27
CantonS	HY	7	3	9	4	261.023
CantonS	HY	7	3	9	4	141.579
CantonS	HY	7	3	9	4	319.649
CantonS	HYtoHS	14	1	1	4	256.038
CantonS	HYtoHS	14	1	1	4	203.993
CantonS	HYtoHS	14	1	1	4	304.095
CantonS	HYtoHS	14	1	1	4	100.102
CantonS	HYtoHS	14	1	1	4	196.216
CantonS	HYtoHS	14	1	1	4	267.404
CantonS	HYtoHS	14	1	1	4	145.368
CantonS	HYtoHS	14	1	1	4	135.198
CantonS	HYtoHS	14	1	1	4	190.234
CantonS	HYtoHS	14	1	1	4	179.865
CantonS	HYtoHS	14	1	1	4	192.826
CantonS	HYtoHS	14	1	1	4	190.234
CantonS	HYtoHS	14	1	1	4	168.897
CantonS	HYtoHS	14	1	1	4	153.743
CantonS	HYtoHS	14	1	1	4	193.225
CantonS	HYtoHS	14	1	1	4	402.602
CantonS	HYtoHS	14	1	1	4	249.657
CantonS	HYtoHS	14	1	1	4	163.912
CantonS	HYtoHS	14	1	1	4	141.778
CantonS	HYtoHS	14	1	1	4	123.233
CantonS	HYtoHS	14	1	1	4	155.338
CantonS	HYtoHS	14	1	1	4	132.605
CantonS	HYtoHS	14	1	1	4	73.98
CantonS	HYtoHS	14	1	1	4	177.472
CantonS	HYtoHS	14	1	1	4	120.442
CantonS	HYtoHS	14	1	1	4	150.153
CantonS	HYtoHS	14	1	1	4	128.019
CantonS	HYtoHS	14	1	1	4	193.225
CantonS	HYtoHS	14	1	1	4	179.466
CantonS	HYtoHS	14	1	1	4	155.737
CantonS	HYtoHS	14	1	2	4	347.965
CantonS	HYtoHS	14	1	2	4	307.685
CantonS	HYtoHS	14	1	2	4	212.368
CantonS	HYtoHS	14	1	2	4	199.606
CantonS	HYtoHS	14	1	2	4	165.508
CantonS	HYtoHS	14	1	2	4	150.552
CantonS	HYtoHS	14	1	2	4	393.429
CantonS	HYtoHS	14	1	2	4	257.035
CantonS	HYtoHS	14	1	2	4	163.713
CantonS	HYtoHS	14	1	2	4	181.859
CantonS	HYtoHS	14	1	2	4	221.74
CantonS	HYtoHS	14	1	2	4	162.915
CantonS	HYtoHS	14	1	2	4	353.548
CantonS	HYtoHS	14	1	2	4	130.013
CantonS	HYtoHS	14	1	2	4	225.728
CantonS	HYtoHS	14	1	2	4	202.398
CantonS	HYtoHS	14	1	2	4	212.568
CantonS	HYtoHS	14	1	2	4	177.273
CantonS	HYtoHS	14	1	2	4	248.66
CantonS	HYtoHS	14	1	2	4	179.466
CantonS	HYtoHS	14	1	2	4	280.964
CantonS	HYtoHS	14	1	2	4	199.606
CantonS	HYtoHS	14	1	2	4	170.892
CantonS	HYtoHS	14	1	2	4	135.597
CantonS	HYtoHS	14	1	2	4	180.862
CantonS	HYtoHS	14	1	2	4	176.874
CantonS	HYtoHS	14	1	2	4	183.654
CantonS	HYtoHS	14	1	2	4	119.445
CantonS	HYtoHS	14	1	2	4	126.424
CantonS	HYtoHS	14	1	2	4	157.731
CantonS	HYtoHS	14	1	3	4	155.737
CantonS	HYtoHS	14	1	3	4	182.657
CantonS	HYtoHS	14	1	3	4	195.219
CantonS	HYtoHS	14	1	3	4	148.558
CantonS	HYtoHS	14	1	3	4	185.847
CantonS	HYtoHS	14	1	3	4	220.344
CantonS	HYtoHS	14	1	3	4	234.702
CantonS	HYtoHS	14	1	3	4	197.811
CantonS	HYtoHS	14	1	3	4	241.083
CantonS	HYtoHS	14	1	3	4	143.972
CantonS	HYtoHS	14	1	3	4	184.252
CantonS	HYtoHS	14	1	3	4	146.365
CantonS	HYtoHS	14	1	3	4	173.085
CantonS	HYtoHS	14	1	3	4	205.788
CantonS	HYtoHS	14	1	3	4	74.179
CantonS	HYtoHS	14	1	3	4	146.165
CantonS	HYtoHS	14	1	3	4	173.085
CantonS	HYtoHS	14	1	3	4	143.373
CantonS	HYtoHS	14	1	3	4	223.136
CantonS	HYtoHS	14	1	3	4	174.481
CantonS	HYtoHS	14	1	3	4	216.755
CantonS	HYtoHS	14	1	3	4	160.124
CantonS	HYtoHS	14	1	3	4	215.758
CantonS	HYtoHS	14	1	3	4	261.023
CantonS	HYtoHS	14	1	3	4	199.407
CantonS	HYtoHS	14	1	3	4	309.679
CantonS	HYtoHS	14	1	3	4	186.246
CantonS	HYtoHS	14	1	3	4	146.963
CantonS	HYtoHS	14	1	3	4	199.008
CantonS	HYtoHS	14	1	3	4	281.562
CantonS	HYtoHS	14	1	4	4	192.427
CantonS	HYtoHS	14	1	4	4	177.073
CantonS	HYtoHS	14	1	4	4	152.147
CantonS	HYtoHS	14	1	4	4	214.96
CantonS	HYtoHS	14	1	4	4	302.899
CantonS	HYtoHS	14	1	4	4	178.868
CantonS	HYtoHS	14	1	4	4	211.172
CantonS	HYtoHS	14	1	4	4	274.184
CantonS	HYtoHS	14	1	4	4	270.794
CantonS	HYtoHS	14	1	4	4	209.178
CantonS	HYtoHS	14	1	4	4	285.55
CantonS	HYtoHS	14	1	4	4	352.551
CantonS	HYtoHS	14	1	4	4	206.187
CantonS	HYtoHS	14	1	4	4	146.365
CantonS	HYtoHS	14	1	4	4	332.012
CantonS	HYtoHS	14	1	4	4	118.248
CantonS	HYtoHS	14	1	4	4	200.404
CantonS	HYtoHS	14	1	4	4	191.63
CantonS	HYtoHS	14	1	4	4	152.746
CantonS	HYtoHS	14	1	4	4	106.683
CantonS	HYtoHS	14	1	4	4	105.087
CantonS	HYtoHS	14	1	4	4	271.791
CantonS	HYtoHS	14	1	4	4	207.582
CantonS	HYtoHS	14	1	4	4	267.205
CantonS	HYtoHS	14	1	4	4	133.802
CantonS	HYtoHS	14	1	4	4	157.531
CantonS	HYtoHS	14	1	4	4	220.145
CantonS	HYtoHS	14	1	4	4	245.669
CantonS	HYtoHS	14	1	4	4	188.639
CantonS	HYtoHS	14	1	4	4	144.37
CantonS	HYtoHS	14	1	4	4	171.889
CantonS	HYtoHS	14	1	5	4	140.183
CantonS	HYtoHS	14	1	5	4	84.349
CantonS	HYtoHS	14	1	5	4	48.057
CantonS	HYtoHS	14	1	5	4	153.144
CantonS	HYtoHS	14	1	5	4	107.081
CantonS	HYtoHS	14	1	5	4	121.239
CantonS	HYtoHS	14	1	5	4	103.492
CantonS	HYtoHS	14	1	5	4	87.34
CantonS	HYtoHS	14	1	5	4	110.073
CantonS	HYtoHS	14	1	5	4	104.689
CantonS	HYtoHS	14	1	5	4	68.397
CantonS	HYtoHS	14	1	5	4	91.328
CantonS	HYtoHS	14	1	5	4	152.347
CantonS	HYtoHS	14	1	5	4	120.641
CantonS	HYtoHS	14	1	5	4	76.572
CantonS	HYtoHS	14	1	5	4	143.373
CantonS	HYtoHS	14	1	5	4	98.507
CantonS	HYtoHS	14	1	5	4	155.936
CantonS	HYtoHS	14	1	5	4	163.115
CantonS	HYtoHS	14	1	5	4	200.204
CantonS	HYtoHS	14	1	5	4	84.548
CantonS	HYtoHS	14	1	5	4	51.846
CantonS	HYtoHS	14	1	5	4	209.178
CantonS	HYtoHS	14	1	5	4	133.403
CantonS	HYtoHS	14	1	5	4	78.766
CantonS	HYtoHS	14	1	5	4	73.382
CantonS	HYtoHS	14	1	5	4	99.903
CantonS	HYtoHS	14	1	5	4	125.826
CantonS	HYtoHS	14	1	5	4	142.576
CantonS	HYtoHS	14	1	5	4	90.73
CantonS	HYtoHS	14	1	6	4	347.765
CantonS	HYtoHS	14	1	6	4	336.2
CantonS	HYtoHS	14	1	6	4	243.874
CantonS	HYtoHS	14	1	6	4	181.46
CantonS	HYtoHS	14	1	6	4	307.485
CantonS	HYtoHS	14	1	6	4	164.909
CantonS	HYtoHS	14	1	6	4	184.451
CantonS	HYtoHS	14	1	6	4	253.247
CantonS	HYtoHS	14	1	6	4	150.353
CantonS	HYtoHS	14	1	6	4	269.797
CantonS	HYtoHS	14	1	6	4	149.356
CantonS	HYtoHS	14	1	6	4	86.543
CantonS	HYtoHS	14	1	6	4	127.82
CantonS	HYtoHS	14	1	6	4	176.276
CantonS	HYtoHS	14	1	6	4	148.757
CantonS	HYtoHS	14	1	6	4	138.388
CantonS	HYtoHS	14	1	6	4	223.136
CantonS	HYtoHS	14	1	6	4	134.998
CantonS	HYtoHS	14	1	6	4	115.058
CantonS	HYtoHS	14	1	6	4	166.106
CantonS	HYtoHS	14	1	6	4	134.201
CantonS	HYtoHS	14	1	6	4	159.326
CantonS	HYtoHS	14	1	6	4	137.192
CantonS	HYtoHS	14	1	6	4	140.981
CantonS	HYtoHS	14	1	6	4	120.641
CantonS	HYtoHS	14	1	6	4	105.087
CantonS	HYtoHS	14	1	6	4	187.442
CantonS	HYtoHS	14	1	6	4	228.121
CantonS	HYtoHS	14	1	6	4	120.442
CantonS	HYtoHS	14	1	6	4	116.852
CantonS	HYtoHS	14	1	7	4	188.439
CantonS	HYtoHS	14	1	7	4	179.665
CantonS	HYtoHS	14	1	7	4	110.272
CantonS	HYtoHS	14	1	7	4	97.909
CantonS	HYtoHS	14	1	7	4	207.782
CantonS	HYtoHS	14	1	7	4	214.562
CantonS	HYtoHS	14	1	7	4	84.748
CantonS	HYtoHS	14	1	7	4	141.778
CantonS	HYtoHS	14	1	7	4	84.15
CantonS	HYtoHS	14	1	7	4	143.972
CantonS	HYtoHS	14	1	7	4	217.353
CantonS	HYtoHS	14	1	7	4	163.912
CantonS	HYtoHS	14	1	7	4	100.302
CantonS	HYtoHS	14	1	7	4	147.76
CantonS	HYtoHS	14	1	7	4	127.421
CantonS	HYtoHS	14	1	7	4	134.799
CantonS	HYtoHS	14	1	7	4	198.011
CantonS	HYtoHS	14	1	7	4	150.153
CantonS	HYtoHS	14	1	7	4	158.728
CantonS	HYtoHS	14	1	7	4	152.147
CantonS	HYtoHS	14	1	7	4	201.401
CantonS	HYtoHS	14	1	7	4	173.284
CantonS	HYtoHS	14	1	7	4	92.724
CantonS	HYtoHS	14	1	7	4	120.242
CantonS	HYtoHS	14	1	7	4	186.445
CantonS	HYtoHS	14	1	7	4	83.751
CantonS	HYtoHS	14	1	7	4	48.057
CantonS	HYtoHS	14	1	7	4	148.159
CantonS	HYtoHS	14	1	7	4	157.133
CantonS	HYtoHS	14	1	7	4	150.153
CantonS	HYtoHS	14	1	8	4	145.567
CantonS	HYtoHS	14	1	8	4	164.311
CantonS	HYtoHS	14	1	8	4	126.623
CantonS	HYtoHS	14	1	8	4	102.694
CantonS	HYtoHS	14	1	8	4	104.489
CantonS	HYtoHS	14	1	8	4	95.117
CantonS	HYtoHS	14	1	8	4	61.018
CantonS	HYtoHS	14	1	8	4	61.218
CantonS	HYtoHS	14	1	8	4	92.724
CantonS	HYtoHS	14	1	8	4	94.519
CantonS	HYtoHS	14	1	8	4	60.62
CantonS	HYtoHS	14	1	8	4	51.846
CantonS	HYtoHS	14	1	8	4	105.087
CantonS	HYtoHS	14	1	8	4	76.173
CantonS	HYtoHS	14	1	8	4	98.906
CantonS	HYtoHS	14	1	8	4	96.712
CantonS	HYtoHS	14	1	8	4	106.683
CantonS	HYtoHS	14	1	8	4	73.78
CantonS	HYtoHS	14	1	8	4	56.033
CantonS	HYtoHS	14	1	8	4	51.447
CantonS	HYtoHS	14	1	8	4	156.135
CantonS	HYtoHS	14	1	8	4	121.04
CantonS	HYtoHS	14	1	8	4	97.909
CantonS	HYtoHS	14	1	8	4	146.564
CantonS	HYtoHS	14	1	8	4	87.34
CantonS	HYtoHS	14	1	8	4	91.727
CantonS	HYtoHS	14	1	8	4	111.867
CantonS	HYtoHS	14	1	8	4	70.789
CantonS	HYtoHS	14	1	8	4	86.941
CantonS	HYtoHS	14	1	8	4	101.697
CantonS	HYtoHS	14	1	9	4	416.561
CantonS	HYtoHS	14	1	9	4	242.279
CantonS	HYtoHS	14	1	9	4	73.581
CantonS	HYtoHS	14	1	9	4	141.579
CantonS	HYtoHS	14	1	9	4	48.456
CantonS	HYtoHS	14	1	9	4	91.328
CantonS	HYtoHS	14	1	9	4	142.177
CantonS	HYtoHS	14	1	9	4	150.751
CantonS	HYtoHS	14	1	9	4	119.046
CantonS	HYtoHS	14	1	9	4	84.947
CantonS	HYtoHS	14	1	9	4	108.078
CantonS	HYtoHS	14	1	9	4	64.408
CantonS	HYtoHS	14	1	9	4	169.296
CantonS	HYtoHS	14	1	9	4	109.474
CantonS	HYtoHS	14	1	9	4	435.704
CantonS	HYtoHS	14	1	9	4	240.086
CantonS	HYtoHS	14	1	9	4	117.251
CantonS	HYtoHS	14	1	9	4	137.989
CantonS	HYtoHS	14	1	9	4	146.963
CantonS	HYtoHS	14	1	9	4	199.606
CantonS	HYtoHS	14	1	9	4	150.552
CantonS	HYtoHS	14	1	9	4	109.075
CantonS	HYtoHS	14	1	9	4	76.373
CantonS	HYtoHS	14	1	9	4	337.596
CantonS	HYtoHS	14	1	9	4	96.712
CantonS	HYtoHS	14	1	9	4	174.88
CantonS	HYtoHS	14	2	1	4	116.055
CantonS	HYtoHS	14	2	1	4	88.537
CantonS	HYtoHS	14	2	1	4	235.699
CantonS	HYtoHS	14	2	1	4	62.414
CantonS	HYtoHS	14	2	1	4	175.279
CantonS	HYtoHS	14	2	1	4	207.582
CantonS	HYtoHS	14	2	1	4	76.173
CantonS	HYtoHS	14	2	1	4	78.566
CantonS	HYtoHS	14	2	1	4	74.179
CantonS	HYtoHS	14	2	1	4	49.652
CantonS	HYtoHS	14	2	1	4	82.355
CantonS	HYtoHS	14	2	1	4	94.12
CantonS	HYtoHS	14	2	1	4	65.605
CantonS	HYtoHS	14	2	1	4	79.164
CantonS	HYtoHS	14	2	1	4	67.001
CantonS	HYtoHS	14	2	1	4	66.402
CantonS	HYtoHS	14	2	1	4	91.528
CantonS	HYtoHS	14	2	1	4	90.331
CantonS	HYtoHS	14	2	1	4	137.989
CantonS	HYtoHS	14	2	1	4	102.694
CantonS	HYtoHS	14	2	1	4	113.064
CantonS	HYtoHS	14	2	1	4	84.15
CantonS	HYtoHS	14	2	1	4	80.361
CantonS	HYtoHS	14	2	1	4	80.76
CantonS	HYtoHS	14	2	1	4	57.23
CantonS	HYtoHS	14	2	1	4	135.796
CantonS	HYtoHS	14	2	1	4	125.227
CantonS	HYtoHS	14	2	1	4	71.388
CantonS	HYtoHS	14	2	1	4	100.302
CantonS	HYtoHS	14	2	1	4	78.167
CantonS	HYtoHS	14	2	2	4	196.416
CantonS	HYtoHS	14	2	2	4	157.531
CantonS	HYtoHS	14	2	2	4	152.147
CantonS	HYtoHS	14	2	2	4	223.136
CantonS	HYtoHS	14	2	2	4	133.403
CantonS	HYtoHS	14	2	2	4	167.302
CantonS	HYtoHS	14	2	2	4	87.54
CantonS	HYtoHS	14	2	2	4	91.528
CantonS	HYtoHS	14	2	2	4	196.416
CantonS	HYtoHS	14	2	2	4	210.574
CantonS	HYtoHS	14	2	2	4	142.975
CantonS	HYtoHS	14	2	2	4	145.567
CantonS	HYtoHS	14	2	2	4	105.287
CantonS	HYtoHS	14	2	2	4	143.772
CantonS	HYtoHS	14	2	2	4	96.712
CantonS	HYtoHS	14	2	2	4	72.185
CantonS	HYtoHS	14	2	2	4	65.804
CantonS	HYtoHS	14	2	2	4	135.198
CantonS	HYtoHS	14	2	2	4	76.572
CantonS	HYtoHS	14	2	2	4	158.528
CantonS	HYtoHS	14	2	2	4	81.557
CantonS	HYtoHS	14	2	2	4	77.17
CantonS	HYtoHS	14	2	2	4	72.584
CantonS	HYtoHS	14	2	2	4	116.653
CantonS	HYtoHS	14	2	2	4	208.181
CantonS	HYtoHS	14	2	2	4	207.184
CantonS	HYtoHS	14	2	2	4	112.665
CantonS	HYtoHS	14	2	2	4	140.582
CantonS	HYtoHS	14	2	2	4	122.037
CantonS	HYtoHS	14	2	2	4	165.308
CantonS	HYtoHS	14	2	3	4	107.081
CantonS	HYtoHS	14	2	3	4	123.034
CantonS	HYtoHS	14	2	3	4	258.232
CantonS	HYtoHS	14	2	3	4	333.209
CantonS	HYtoHS	14	2	3	4	96.712
CantonS	HYtoHS	14	2	3	4	324.235
CantonS	HYtoHS	14	2	3	4	259.428
CantonS	HYtoHS	14	2	3	4	177.073
CantonS	HYtoHS	14	2	3	4	281.163
CantonS	HYtoHS	14	2	3	4	119.445
CantonS	HYtoHS	14	2	4	4	168.299
CantonS	HYtoHS	14	2	4	4	149.356
CantonS	HYtoHS	14	2	4	4	135.397
CantonS	HYtoHS	14	2	4	4	92.924
CantonS	HYtoHS	14	2	4	4	108.078
CantonS	HYtoHS	14	2	4	4	171.889
CantonS	HYtoHS	14	2	4	4	159.326
CantonS	HYtoHS	14	2	4	4	86.742
CantonS	HYtoHS	14	2	4	4	87.938
CantonS	HYtoHS	14	2	4	4	111.07
CantonS	HYtoHS	14	2	4	4	165.109
CantonS	HYtoHS	14	2	4	4	135.397
CantonS	HYtoHS	14	2	4	4	125.626
CantonS	HYtoHS	14	2	4	4	130.611
CantonS	HYtoHS	14	2	4	4	151.15
CantonS	HYtoHS	14	2	4	4	121.239
CantonS	HYtoHS	14	2	4	4	158.927
CantonS	HYtoHS	14	2	4	4	139.186
CantonS	HYtoHS	14	2	4	4	240.285
CantonS	HYtoHS	14	2	4	4	151.15
CantonS	HYtoHS	14	2	4	4	147.561
CantonS	HYtoHS	14	2	4	4	160.722
CantonS	HYtoHS	14	2	4	4	287.345
CantonS	HYtoHS	14	2	4	4	139.784
CantonS	HYtoHS	14	2	4	4	150.951
CantonS	HYtoHS	14	2	4	4	154.74
CantonS	HYtoHS	14	2	4	4	143.972
CantonS	HYtoHS	14	2	4	4	235.101
CantonS	HYtoHS	14	2	4	4	220.145
CantonS	HYtoHS	14	2	4	4	147.362
CantonS	HYtoHS	14	2	5	4	195.419
CantonS	HYtoHS	14	2	5	4	221.142
CantonS	HYtoHS	14	2	5	4	215.16
CantonS	HYtoHS	14	2	5	4	122.037
CantonS	HYtoHS	14	2	5	4	118.647
CantonS	HYtoHS	14	2	5	4	64.01
CantonS	HYtoHS	14	2	5	4	79.962
CantonS	HYtoHS	14	2	5	4	231.711
CantonS	HYtoHS	14	2	5	4	176.475
CantonS	HYtoHS	14	2	5	4	114.858
CantonS	HYtoHS	14	2	5	4	69.792
CantonS	HYtoHS	14	2	5	4	217.154
CantonS	HYtoHS	14	2	5	4	68.397
CantonS	HYtoHS	14	2	5	4	118.248
CantonS	HYtoHS	14	2	5	4	118.049
CantonS	HYtoHS	14	2	5	4	105.486
CantonS	HYtoHS	14	2	5	4	131.01
CantonS	HYtoHS	14	2	5	4	102.894
CantonS	HYtoHS	14	2	5	4	507.69
CantonS	HYtoHS	14	2	5	4	477.779
CantonS	HYtoHS	14	2	5	4	341.384
CantonS	HYtoHS	14	2	5	4	214.362
CantonS	HYtoHS	14	2	5	4	290.934
CantonS	HYtoHS	14	2	5	4	232.907
CantonS	HYtoHS	14	2	5	4	326.229
CantonS	HYtoHS	14	2	5	4	126.025
CantonS	HYtoHS	14	2	5	4	189.038
CantonS	HYtoHS	14	2	5	4	141.18
CantonS	HYtoHS	14	2	5	4	170.892
CantonS	HYtoHS	14	2	5	4	118.049
CantonS	HYtoHS	14	2	6	4	207.184
CantonS	HYtoHS	14	2	6	4	236.297
CantonS	HYtoHS	14	2	6	4	220.344
CantonS	HYtoHS	14	2	6	4	88.537
CantonS	HYtoHS	14	2	6	4	117.65
CantonS	HYtoHS	14	2	6	4	137.591
CantonS	HYtoHS	14	2	6	4	166.903
CantonS	HYtoHS	14	2	6	4	247.464
CantonS	HYtoHS	14	2	6	4	175.677
CantonS	HYtoHS	14	2	6	4	140.382
CantonS	HYtoHS	14	2	6	4	164.511
CantonS	HYtoHS	14	2	6	4	119.245
CantonS	HYtoHS	14	2	6	4	147.96
CantonS	HYtoHS	14	2	6	4	127.62
CantonS	HYtoHS	14	2	6	4	145.168
CantonS	HYtoHS	14	2	6	4	136.594
CantonS	HYtoHS	14	2	6	4	142.376
CantonS	HYtoHS	14	2	6	4	89.135
CantonS	HYtoHS	14	2	6	4	71.986
CantonS	HYtoHS	14	2	6	4	193.225
CantonS	HYtoHS	14	2	6	4	159.525
CantonS	HYtoHS	14	2	6	4	187.044
CantonS	HYtoHS	14	2	6	4	140.781
CantonS	HYtoHS	14	2	6	4	105.087
CantonS	HYtoHS	14	2	6	4	208.779
CantonS	HYtoHS	14	2	7	4	583.464
CantonS	HYtoHS	14	2	7	4	351.953
CantonS	HYtoHS	14	2	7	4	235.898
CantonS	HYtoHS	14	2	7	4	361.524
CantonS	HYtoHS	14	2	7	4	328.024
CantonS	HYtoHS	14	2	7	4	349.161
CantonS	HYtoHS	14	2	7	4	317.057
CantonS	HYtoHS	14	2	7	4	363.718
CantonS	HYtoHS	14	2	7	4	328.622
CantonS	HYtoHS	14	2	7	4	344.974
CantonS	HYtoHS	14	2	7	4	434.707
CantonS	HYtoHS	14	2	7	4	305.691
CantonS	HYtoHS	14	2	7	4	302.899
CantonS	HYtoHS	14	2	7	4	222.339
CantonS	HYtoHS	14	2	7	4	231.711
CantonS	HYtoHS	14	2	7	4	275.979
CantonS	HYtoHS	14	2	7	4	290.934
CantonS	HYtoHS	14	2	7	4	242.877
CantonS	HYtoHS	14	2	7	4	314.265
CantonS	HYtoHS	14	2	7	4	228.72
CantonS	HYtoHS	14	2	7	4	250.255
CantonS	HYtoHS	14	2	7	4	326.429
CantonS	HYtoHS	14	2	7	4	214.96
CantonS	HYtoHS	14	2	7	4	218.151
CantonS	HYtoHS	14	2	7	4	158.329
CantonS	HYtoHS	14	2	7	4	290.536
CantonS	HYtoHS	14	2	7	4	282.759
CantonS	HYtoHS	14	2	7	4	347.167
CantonS	HYtoHS	14	2	7	4	255.041
CantonS	HYtoHS	14	2	7	4	195.419
CantonS	HYtoHS	14	2	8	4	362.322
CantonS	HYtoHS	14	2	8	4	172.487
CantonS	HYtoHS	14	2	8	4	224.133
CantonS	HYtoHS	14	2	8	4	195.618
CantonS	HYtoHS	14	2	8	4	331.015
CantonS	HYtoHS	14	2	8	4	241.681
CantonS	HYtoHS	14	2	8	4	251.452
CantonS	HYtoHS	14	2	8	4	169.097
CantonS	HYtoHS	14	2	8	4	146.564
CantonS	HYtoHS	14	2	8	4	167.502
CantonS	HYtoHS	14	2	8	4	130.213
CantonS	HYtoHS	14	2	8	4	63.611
CantonS	HYtoHS	14	2	8	4	223.934
CantonS	HYtoHS	14	2	8	4	240.086
CantonS	HYtoHS	14	2	8	4	256.038
CantonS	HYtoHS	14	2	8	4	296.917
CantonS	HYtoHS	14	2	8	4	314.265
CantonS	HYtoHS	14	2	8	4	122.236
CantonS	HYtoHS	14	2	8	4	221.541
CantonS	HYtoHS	14	2	8	4	128.418
CantonS	HYtoHS	14	2	8	4	86.343
CantonS	HYtoHS	14	2	8	4	89.932
CantonS	HYtoHS	14	2	8	4	142.376
CantonS	HYtoHS	14	2	8	4	90.132
CantonS	HYtoHS	14	2	8	4	68.397
CantonS	HYtoHS	14	2	8	4	115.456
CantonS	HYtoHS	14	2	8	4	200.404
CantonS	HYtoHS	14	2	8	4	254.642
CantonS	HYtoHS	14	2	8	4	110.073
CantonS	HYtoHS	14	2	8	4	159.127
CantonS	HYtoHS	14	3	1	4	81.557
CantonS	HYtoHS	14	3	1	4	118.049
CantonS	HYtoHS	14	3	1	4	120.641
CantonS	HYtoHS	14	3	1	4	73.98
CantonS	HYtoHS	14	3	1	4	88.935
CantonS	HYtoHS	14	3	1	4	126.224
CantonS	HYtoHS	14	3	1	4	223.136
CantonS	HYtoHS	14	3	1	4	98.507
CantonS	HYtoHS	14	3	1	4	93.921
CantonS	HYtoHS	14	3	1	4	175.478
CantonS	HYtoHS	14	3	1	4	96.313
CantonS	HYtoHS	14	3	1	4	58.426
CantonS	HYtoHS	14	3	1	4	113.263
CantonS	HYtoHS	14	3	1	4	283.756
CantonS	HYtoHS	14	3	1	4	125.626
CantonS	HYtoHS	14	3	1	4	166.106
CantonS	HYtoHS	14	3	1	4	93.123
CantonS	HYtoHS	14	3	1	4	256.038
CantonS	HYtoHS	14	3	1	4	235.699
CantonS	HYtoHS	14	3	1	4	181.061
CantonS	HYtoHS	14	3	1	4	162.118
CantonS	HYtoHS	14	3	1	4	84.548
CantonS	HYtoHS	14	3	1	4	84.15
CantonS	HYtoHS	14	3	1	4	92.924
CantonS	HYtoHS	14	3	2	4	142.975
CantonS	HYtoHS	14	3	2	4	96.912
CantonS	HYtoHS	14	3	2	4	272.788
CantonS	HYtoHS	14	3	2	4	79.763
CantonS	HYtoHS	14	3	2	4	228.72
CantonS	HYtoHS	14	3	2	4	230.315
CantonS	HYtoHS	14	3	2	4	447.269
CantonS	HYtoHS	14	3	2	4	214.761
CantonS	HYtoHS	14	3	2	4	244.473
CantonS	HYtoHS	14	3	2	4	278.97
CantonS	HYtoHS	14	3	2	4	241.083
CantonS	HYtoHS	14	3	2	4	171.29
CantonS	HYtoHS	14	3	2	4	227.722
CantonS	HYtoHS	14	3	2	4	233.904
CantonS	HYtoHS	14	3	2	4	155.737
CantonS	HYtoHS	14	3	2	4	194.422
CantonS	HYtoHS	14	3	2	4	249.857
CantonS	HYtoHS	14	3	2	4	275.58
CantonS	HYtoHS	14	3	2	4	231.112
CantonS	HYtoHS	14	3	2	4	179.466
CantonS	HYtoHS	14	3	2	4	122.436
CantonS	HYtoHS	14	3	2	4	242.08
CantonS	HYtoHS	14	3	2	4	149.156
CantonS	HYtoHS	14	3	2	4	152.546
CantonS	HYtoHS	14	3	2	4	214.163
CantonS	HYtoHS	14	3	2	4	121.239
CantonS	HYtoHS	14	3	2	4	147.162
CantonS	HYtoHS	14	3	2	4	80.76
CantonS	HYtoHS	14	3	2	4	69.394
CantonS	HYtoHS	14	3	2	4	108.078
CantonS	HYtoHS	14	3	3	4	181.859
CantonS	HYtoHS	14	3	3	4	223.934
CantonS	HYtoHS	14	3	3	4	221.541
CantonS	HYtoHS	14	3	3	4	144.171
CantonS	HYtoHS	14	3	3	4	206.984
CantonS	HYtoHS	14	3	3	4	325.831
CantonS	HYtoHS	14	3	3	4	280.366
CantonS	HYtoHS	14	3	3	4	220.544
CantonS	HYtoHS	14	3	3	4	132.406
CantonS	HYtoHS	14	3	3	4	201.002
CantonS	HYtoHS	14	3	3	4	137.192
CantonS	HYtoHS	14	3	3	4	217.154
CantonS	HYtoHS	14	3	3	4	138.986
CantonS	HYtoHS	14	3	3	4	250.255
CantonS	HYtoHS	14	3	3	4	180.662
CantonS	HYtoHS	14	3	3	4	178.27
CantonS	HYtoHS	14	3	3	4	203.794
CantonS	HYtoHS	14	3	3	4	197.014
CantonS	HYtoHS	14	3	3	4	133.603
CantonS	HYtoHS	14	3	3	4	242.08
CantonS	HYtoHS	14	3	3	4	187.243
CantonS	HYtoHS	14	3	3	4	136.195
CantonS	HYtoHS	14	3	3	4	182.258
CantonS	HYtoHS	14	3	3	4	240.086
CantonS	HYtoHS	14	3	3	4	311.872
CantonS	HYtoHS	14	3	3	4	212.169
CantonS	HYtoHS	14	3	3	4	259.428
CantonS	HYtoHS	14	3	3	4	212.169
CantonS	HYtoHS	14	3	3	4	159.725
CantonS	HYtoHS	14	3	3	4	138.787
CantonS	HYtoHS	14	3	4	4	124.43
CantonS	HYtoHS	14	3	4	4	105.287
CantonS	HYtoHS	14	3	4	4	101.299
CantonS	HYtoHS	14	3	4	4	92.126
CantonS	HYtoHS	14	3	4	4	98.906
CantonS	HYtoHS	14	3	4	4	121.439
CantonS	HYtoHS	14	3	4	4	178.27
CantonS	HYtoHS	14	3	4	4	55.036
CantonS	HYtoHS	14	3	4	4	99.703
CantonS	HYtoHS	14	3	4	4	136.394
CantonS	HYtoHS	14	3	4	4	202.797
CantonS	HYtoHS	14	3	4	4	140.183
CantonS	HYtoHS	14	3	4	4	106.284
CantonS	HYtoHS	14	3	4	4	229.318
CantonS	HYtoHS	14	3	4	4	99.703
CantonS	HYtoHS	14	3	4	4	102.096
CantonS	HYtoHS	14	3	4	4	142.775
CantonS	HYtoHS	14	3	4	4	134.998
CantonS	HYtoHS	14	3	4	4	116.653
CantonS	HYtoHS	14	3	4	4	155.936
CantonS	HYtoHS	14	3	4	4	85.944
CantonS	HYtoHS	14	3	4	4	93.921
CantonS	HYtoHS	14	3	4	4	129.814
CantonS	HYtoHS	14	3	4	4	68.397
CantonS	HYtoHS	14	3	4	4	118.448
CantonS	HYtoHS	14	3	4	4	67.998
CantonS	HYtoHS	14	3	4	4	190.832
CantonS	HYtoHS	14	3	4	4	102.096
CantonS	HYtoHS	14	3	4	4	93.123
CantonS	HYtoHS	14	3	4	4	112.665
CantonS	HYtoHS	14	3	5	4	210.972
CantonS	HYtoHS	14	3	5	4	173.484
CantonS	HYtoHS	14	3	5	4	152.746
CantonS	HYtoHS	14	3	5	4	172.686
CantonS	HYtoHS	14	3	5	4	174.68
CantonS	HYtoHS	14	3	5	4	262.419
CantonS	HYtoHS	14	3	5	4	232.508
CantonS	HYtoHS	14	3	5	4	285.152
CantonS	HYtoHS	14	3	5	4	227.523
CantonS	HYtoHS	14	3	5	4	173.883
CantonS	HYtoHS	14	3	5	4	198.41
CantonS	HYtoHS	14	3	5	4	345.173
CantonS	HYtoHS	14	3	5	4	206.585
CantonS	HYtoHS	14	3	5	4	239.288
CantonS	HYtoHS	14	3	5	4	274.583
CantonS	HYtoHS	14	3	5	4	214.562
CantonS	HYtoHS	14	3	5	4	337.994
CantonS	HYtoHS	14	3	5	4	164.511
CantonS	HYtoHS	14	3	5	4	190.433
CantonS	HYtoHS	14	3	5	4	193.823
CantonS	HYtoHS	14	3	5	4	237.693
CantonS	HYtoHS	14	3	5	4	231.511
CantonS	HYtoHS	14	3	5	4	173.883
CantonS	HYtoHS	14	3	5	4	141.778
CantonS	HYtoHS	14	3	5	4	218.749
CantonS	HYtoHS	14	3	5	4	148.159
CantonS	HYtoHS	14	3	5	4	165.707
CantonS	HYtoHS	14	3	5	4	92.724
CantonS	HYtoHS	14	3	5	4	279.369
CantonS	HYtoHS	14	3	5	4	302.301
CantonS	HYtoHS	14	3	6	4	494.728
CantonS	HYtoHS	14	3	6	4	347.367
CantonS	HYtoHS	14	3	6	4	268.601
CantonS	HYtoHS	14	3	6	4	319.45
CantonS	HYtoHS	14	3	6	4	209.776
CantonS	HYtoHS	14	3	6	4	288.741
CantonS	HYtoHS	14	3	6	4	460.63
CantonS	HYtoHS	14	3	6	4	381.266
CantonS	HYtoHS	14	3	6	4	327.226
CantonS	HYtoHS	14	3	6	4	240.883
CantonS	HYtoHS	14	3	6	4	362.521
CantonS	HYtoHS	14	3	6	4	191.43
CantonS	HYtoHS	14	3	6	4	286.348
CantonS	HYtoHS	14	3	6	4	271.193
CantonS	HYtoHS	14	3	6	4	280.166
CantonS	HYtoHS	14	3	6	4	250.056
CantonS	HYtoHS	14	3	6	4	188.041
CantonS	HYtoHS	14	3	6	4	185.847
CantonS	HYtoHS	14	3	6	4	167.302
CantonS	HYtoHS	14	3	6	4	298.512
CantonS	HYtoHS	14	3	6	4	322.241
CantonS	HYtoHS	14	3	6	4	186.046
CantonS	HYtoHS	14	3	6	4	451.457
CantonS	HYtoHS	14	3	6	4	276.378
CantonS	HYtoHS	14	3	6	4	355.542
CantonS	HYtoHS	14	3	6	4	246.068
CantonS	HYtoHS	14	3	6	4	423.34
CantonS	HYtoHS	14	3	6	4	256.238
CantonS	HYtoHS	14	3	6	4	298.512
CantonS	HYtoHS	14	3	6	4	139.984
CantonS	HYtoHS	14	3	7	4	279.169
CantonS	HYtoHS	14	3	7	4	232.309
CantonS	HYtoHS	14	3	7	4	239.089
CantonS	HYtoHS	14	3	7	4	220.344
CantonS	HYtoHS	14	3	7	4	172.886
CantonS	HYtoHS	14	3	7	4	176.076
CantonS	HYtoHS	14	3	7	4	120.442
CantonS	HYtoHS	14	3	7	4	251.252
CantonS	HYtoHS	14	3	7	4	292.53
CantonS	HYtoHS	14	3	7	4	192.826
CantonS	HYtoHS	14	3	7	4	219.746
CantonS	HYtoHS	14	3	7	4	142.775
CantonS	HYtoHS	14	3	7	4	226.327
CantonS	HYtoHS	14	3	7	4	202.597
CantonS	HYtoHS	14	3	7	4	145.368
CantonS	HYtoHS	14	3	7	4	248.461
CantonS	HYtoHS	14	3	7	4	180.264
CantonS	HYtoHS	14	3	7	4	160.921
CantonS	HYtoHS	14	3	7	4	76.971
CantonS	HYtoHS	14	3	7	4	134.201
CantonS	HYtoHS	14	3	7	4	190.234
CantonS	HYtoHS	14	3	7	4	123.233
CantonS	HYtoHS	14	3	7	4	148.757
CantonS	HYtoHS	14	3	7	4	158.329
CantonS	HYtoHS	14	3	7	4	128.617
CantonS	HYtoHS	14	3	7	4	200.005
CantonS	HYtoHS	14	3	7	4	139.984
CantonS	HYtoHS	14	3	7	4	256.038
CantonS	HYtoHS	14	3	7	4	206.785
CantonS	HYtoHS	14	3	7	4	185.049
CantonS	Eclosion	0	1	1	4	139.385
CantonS	Eclosion	0	1	1	4	196.615
CantonS	Eclosion	0	1	1	4	128.019
CantonS	Eclosion	0	1	1	4	166.505
CantonS	Eclosion	0	1	1	4	277.973
CantonS	Eclosion	0	1	1	4	265.41
CantonS	Eclosion	0	1	1	4	226.327
CantonS	Eclosion	0	1	1	4	202.198
CantonS	Eclosion	0	1	1	4	163.314
CantonS	Eclosion	0	1	1	4	230.714
CantonS	Eclosion	0	1	1	4	115.656
CantonS	Eclosion	0	1	1	4	213.166
CantonS	Eclosion	0	1	1	4	169.496
CantonS	Eclosion	0	1	1	4	163.314
CantonS	Eclosion	0	1	1	4	200.404
CantonS	Eclosion	0	1	1	4	201.401
CantonS	Eclosion	0	1	1	4	226.925
CantonS	Eclosion	0	1	1	4	173.284
CantonS	Eclosion	0	1	1	4	237.892
CantonS	Eclosion	0	1	1	4	210.175
CantonS	Eclosion	0	1	1	4	176.276
CantonS	Eclosion	0	1	1	4	157.93
CantonS	Eclosion	0	1	1	4	215.957
CantonS	Eclosion	0	1	1	4	179.267
CantonS	Eclosion	0	1	1	4	216.955
CantonS	Eclosion	0	1	1	4	259.428
CantonS	Eclosion	0	1	1	4	171.689
CantonS	Eclosion	0	1	1	4	181.061
CantonS	Eclosion	0	1	1	4	201.6
CantonS	Eclosion	0	1	1	4	214.562
CantonS	Eclosion	0	1	2	4	163.314
CantonS	Eclosion	0	1	2	4	207.782
CantonS	Eclosion	0	1	2	4	162.915
CantonS	Eclosion	0	1	2	4	139.585
CantonS	Eclosion	0	1	2	4	147.76
CantonS	Eclosion	0	1	2	4	170.493
CantonS	Eclosion	0	1	2	4	148.359
CantonS	Eclosion	0	1	2	4	157.531
CantonS	Eclosion	0	1	2	4	181.859
CantonS	Eclosion	0	1	2	4	192.427
CantonS	Eclosion	0	1	2	4	105.885
CantonS	Eclosion	0	1	2	4	275.78
CantonS	Eclosion	0	1	2	4	129.814
CantonS	Eclosion	0	1	2	4	132.605
CantonS	Eclosion	0	1	2	4	139.784
CantonS	Eclosion	0	1	2	4	70.191
CantonS	Eclosion	0	1	2	4	167.701
CantonS	Eclosion	0	1	2	4	107.879
CantonS	Eclosion	0	1	2	4	143.972
CantonS	Eclosion	0	1	2	4	175.877
CantonS	Eclosion	0	1	2	4	182.058
CantonS	Eclosion	0	1	2	4	200.603
CantonS	Eclosion	0	1	2	4	138.588
CantonS	Eclosion	0	1	2	4	135.995
CantonS	Eclosion	0	1	2	4	133.204
CantonS	Eclosion	0	1	2	4	155.338
CantonS	Eclosion	0	1	2	4	202.198
CantonS	Eclosion	0	1	2	4	137.79
CantonS	Eclosion	0	1	2	4	177.871
CantonS	Eclosion	0	1	2	4	105.686
CantonS	Eclosion	0	1	3	4	123.832
CantonS	Eclosion	0	1	3	4	114.659
CantonS	Eclosion	0	1	3	4	91.727
CantonS	Eclosion	0	1	3	4	91.328
CantonS	Eclosion	0	1	3	4	126.823
CantonS	Eclosion	0	1	3	4	103.891
CantonS	Eclosion	0	1	3	4	88.935
CantonS	Eclosion	0	1	3	4	125.028
CantonS	Eclosion	0	1	3	4	98.706
CantonS	Eclosion	0	1	3	4	115.656
CantonS	Eclosion	0	1	3	4	105.885
CantonS	Eclosion	0	1	3	4	61.417
CantonS	Eclosion	0	1	3	4	78.766
CantonS	Eclosion	0	1	3	4	71.188
CantonS	Eclosion	0	1	3	4	84.349
CantonS	Eclosion	0	1	3	4	109.075
CantonS	Eclosion	0	1	3	4	107.48
CantonS	Eclosion	0	1	3	4	179.267
CantonS	Eclosion	0	1	3	4	88.736
CantonS	Eclosion	0	1	3	4	113.064
CantonS	Eclosion	0	1	3	4	108.477
CantonS	Eclosion	0	1	3	4	89.932
CantonS	Eclosion	0	1	3	4	127.022
CantonS	Eclosion	0	1	3	4	103.093
CantonS	Eclosion	0	1	3	4	108.477
CantonS	Eclosion	0	1	3	4	114.858
CantonS	Eclosion	0	1	3	4	122.635
CantonS	Eclosion	0	1	3	4	162.516
CantonS	Eclosion	0	1	3	4	108.677
CantonS	Eclosion	0	1	3	4	107.68
CantonS	Eclosion	0	1	4	4	127.82
CantonS	Eclosion	0	1	4	4	65.405
CantonS	Eclosion	0	1	4	4	107.081
CantonS	Eclosion	0	1	4	4	180.862
CantonS	Eclosion	0	1	4	4	84.15
CantonS	Eclosion	0	1	4	4	206.984
CantonS	Eclosion	0	1	4	4	198.809
CantonS	Eclosion	0	1	4	4	158.728
CantonS	Eclosion	0	1	4	4	81.956
CantonS	Eclosion	0	1	4	4	123.233
CantonS	Eclosion	0	1	4	4	128.219
CantonS	Eclosion	0	1	4	4	109.075
CantonS	Eclosion	0	1	4	4	117.451
CantonS	Eclosion	0	1	4	4	145.966
CantonS	Eclosion	0	1	4	4	187.442
CantonS	Eclosion	0	1	4	4	104.489
CantonS	Eclosion	0	1	4	4	85.545
CantonS	Eclosion	0	1	4	4	67.2
CantonS	Eclosion	0	1	4	4	91.528
CantonS	Eclosion	0	1	4	4	117.251
CantonS	Eclosion	0	1	4	4	104.29
CantonS	Eclosion	0	1	4	4	137.79
CantonS	Eclosion	0	1	4	4	102.096
CantonS	Eclosion	0	1	4	4	123.034
CantonS	Eclosion	0	1	4	4	134.799
CantonS	Eclosion	0	1	4	4	117.251
CantonS	Eclosion	0	1	4	4	73.382
CantonS	Eclosion	0	1	4	4	121.04
CantonS	Eclosion	0	1	4	4	108.477
CantonS	Eclosion	0	1	4	4	152.347
CantonS	Eclosion	0	1	5	4	299.908
CantonS	Eclosion	0	1	5	4	149.555
CantonS	Eclosion	0	1	5	4	140.582
CantonS	Eclosion	0	1	5	4	106.882
CantonS	Eclosion	0	1	5	4	155.537
CantonS	Eclosion	0	1	5	4	94.12
CantonS	Eclosion	0	1	5	4	171.49
CantonS	Eclosion	0	1	5	4	104.489
CantonS	Eclosion	0	1	5	4	189.237
CantonS	Eclosion	0	1	5	4	102.096
CantonS	Eclosion	0	1	5	4	231.511
CantonS	Eclosion	0	1	5	4	199.606
CantonS	Eclosion	0	1	5	4	195.419
CantonS	Eclosion	0	1	5	4	70.59
CantonS	Eclosion	0	1	5	4	188.24
CantonS	Eclosion	0	1	5	4	171.689
CantonS	Eclosion	0	1	5	4	133.403
CantonS	Eclosion	0	1	5	4	150.153
CantonS	Eclosion	0	1	5	4	118.647
CantonS	Eclosion	0	1	5	4	162.317
CantonS	Eclosion	0	1	5	4	124.829
CantonS	Eclosion	0	1	5	4	97.31
CantonS	Eclosion	0	1	5	4	149.555
CantonS	Eclosion	0	1	5	4	116.852
CantonS	Eclosion	0	1	5	4	88.337
CantonS	Eclosion	0	1	5	4	92.924
CantonS	Eclosion	0	1	5	4	103.691
CantonS	Eclosion	0	1	5	4	161.121
CantonS	Eclosion	0	1	5	4	357.337
CantonS	Eclosion	0	1	5	4	119.644
CantonS	Eclosion	0	2	1	4	76.572
CantonS	Eclosion	0	2	1	4	80.959
CantonS	Eclosion	0	2	1	4	97.709
CantonS	Eclosion	0	2	1	4	55.236
CantonS	Eclosion	0	2	1	4	75.575
CantonS	Eclosion	0	2	1	4	99.504
CantonS	Eclosion	0	2	1	4	105.885
CantonS	Eclosion	0	2	1	4	94.718
CantonS	Eclosion	0	2	1	4	64.807
CantonS	Eclosion	0	2	1	4	94.12
CantonS	Eclosion	0	2	1	4	71.388
CantonS	Eclosion	0	2	1	4	99.903
CantonS	Eclosion	0	2	1	4	83.153
CantonS	Eclosion	0	2	1	4	58.227
CantonS	Eclosion	0	2	1	4	82.754
CantonS	Eclosion	0	2	1	4	80.162
CantonS	Eclosion	0	2	1	4	69.394
CantonS	Eclosion	0	2	1	4	54.837
CantonS	Eclosion	0	2	1	4	77.968
CantonS	Eclosion	0	2	1	4	78.367
CantonS	Eclosion	0	2	1	4	98.308
CantonS	Eclosion	0	2	1	4	94.319
CantonS	Eclosion	0	2	1	4	99.105
CantonS	Eclosion	0	2	1	4	102.495
CantonS	Eclosion	0	2	1	4	70.789
CantonS	Eclosion	0	2	1	4	61.018
CantonS	Eclosion	0	2	1	4	66.801
CantonS	Eclosion	0	2	1	4	59.024
CantonS	Eclosion	0	2	1	4	81.956
CantonS	Eclosion	0	2	1	4	82.953
CantonS	Eclosion	0	2	2	4	75.775
CantonS	Eclosion	0	2	2	4	105.486
CantonS	Eclosion	0	2	2	4	76.173
CantonS	Eclosion	0	2	2	4	90.331
CantonS	Eclosion	0	2	2	4	62.015
CantonS	Eclosion	0	2	2	4	86.144
CantonS	Eclosion	0	2	2	4	77.968
CantonS	Eclosion	0	2	2	4	79.563
CantonS	Eclosion	0	2	2	4	91.727
CantonS	Eclosion	0	2	2	4	135.397
CantonS	Eclosion	0	2	2	4	79.364
CantonS	Eclosion	0	2	2	4	77.968
CantonS	Eclosion	0	2	2	4	74.179
CantonS	Eclosion	0	2	2	4	55.236
CantonS	Eclosion	0	2	2	4	122.236
CantonS	Eclosion	0	2	3	4	60.021
CantonS	Eclosion	0	2	3	4	100.501
CantonS	Eclosion	0	2	3	4	52.843
CantonS	Eclosion	0	2	3	4	59.822
CantonS	Eclosion	0	2	3	4	67.001
CantonS	Eclosion	0	2	3	4	54.637
CantonS	Eclosion	0	2	3	4	53.441
CantonS	Eclosion	0	2	3	4	49.652
CantonS	Eclosion	0	2	3	4	38.884
CantonS	Eclosion	0	2	3	4	73.182
CantonS	Eclosion	0	2	3	4	62.414
CantonS	Eclosion	0	2	3	4	52.643
CantonS	Eclosion	0	2	3	4	48.256
CantonS	Eclosion	0	2	3	4	48.057
CantonS	Eclosion	0	2	3	4	84.947
CantonS	Eclosion	0	2	3	4	113.662
CantonS	Eclosion	0	2	3	4	105.686
CantonS	Eclosion	0	2	3	4	53.042
CantonS	Eclosion	0	2	3	4	54.837
CantonS	Eclosion	0	2	3	4	78.965
CantonS	Eclosion	0	2	3	4	65.804
CantonS	Eclosion	0	2	3	4	59.423
CantonS	Eclosion	0	2	3	4	57.23
CantonS	Eclosion	0	2	3	4	91.129
CantonS	Eclosion	0	2	3	4	96.313
CantonS	Eclosion	0	2	3	4	75.376
CantonS	Eclosion	0	2	3	4	102.296
CantonS	Eclosion	0	2	3	4	69.992
CantonS	Eclosion	0	2	3	4	78.566
CantonS	Eclosion	0	2	3	4	78.965
CantonS	Eclosion	0	2	4	4	101.897
CantonS	Eclosion	0	2	4	4	65.605
CantonS	Eclosion	0	2	4	4	73.182
CantonS	Eclosion	0	2	4	4	56.831
CantonS	Eclosion	0	2	4	4	63.611
CantonS	Eclosion	0	2	4	4	75.575
CantonS	Eclosion	0	2	4	4	65.804
CantonS	Eclosion	0	2	4	4	63.611
CantonS	Eclosion	0	2	4	4	73.182
CantonS	Eclosion	0	2	4	4	36.093
CantonS	Eclosion	0	2	4	4	126.025
CantonS	Eclosion	0	2	4	4	86.343
CantonS	Eclosion	0	2	4	4	72.584
CantonS	Eclosion	0	2	4	4	90.132
CantonS	Eclosion	0	2	4	4	79.164
CantonS	Eclosion	0	2	4	4	54.438
CantonS	Eclosion	0	2	4	4	95.915
CantonS	Eclosion	0	2	4	4	64.807
CantonS	Eclosion	0	2	4	4	60.62
CantonS	Eclosion	0	2	4	4	89.733
CantonS	Eclosion	0	2	4	4	75.974
CantonS	Eclosion	0	2	4	4	84.548
CantonS	Eclosion	0	2	4	4	72.783
CantonS	Eclosion	0	2	4	4	58.227
CantonS	Eclosion	0	2	4	4	58.227
CantonS	Eclosion	0	2	4	4	39.483
CantonS	Eclosion	0	2	5	4	182.058
CantonS	Eclosion	0	2	5	4	165.508
CantonS	Eclosion	0	2	5	4	171.29
CantonS	Eclosion	0	2	5	4	154.141
CantonS	Eclosion	0	2	5	4	224.931
CantonS	Eclosion	0	2	5	4	139.186
CantonS	Eclosion	0	2	5	4	231.511
CantonS	Eclosion	0	2	5	4	155.936
CantonS	Eclosion	0	2	5	4	218.749
CantonS	Eclosion	0	2	5	4	197.213
CantonS	Eclosion	0	2	5	4	147.76
CantonS	Eclosion	0	2	5	4	186.246
CantonS	Eclosion	0	2	5	4	176.874
CantonS	Eclosion	0	2	5	4	130.213
CantonS	Eclosion	0	2	5	4	158.13
CantonS	Eclosion	0	2	5	4	214.96
CantonS	Eclosion	0	2	5	4	203.794
CantonS	Eclosion	0	2	5	4	183.654
CantonS	Eclosion	0	2	5	4	189.636
CantonS	Eclosion	0	2	5	4	125.028
CantonS	Eclosion	0	2	5	4	214.362
CantonS	Eclosion	0	2	5	4	121.439
CantonS	Eclosion	0	2	5	4	158.13
CantonS	Eclosion	0	2	5	4	176.475
CantonS	Eclosion	0	2	5	4	165.109
CantonS	Eclosion	0	2	5	4	149.356
CantonS	Eclosion	0	2	5	4	175.677
CantonS	Eclosion	0	2	5	4	143.972
CantonS	Eclosion	0	2	5	4	109.873
CantonS	Eclosion	0	2	5	4	159.127
CantonS	Eclosion	0	3	1	4	126.623
CantonS	Eclosion	0	3	1	4	98.706
CantonS	Eclosion	0	3	1	4	156.534
CantonS	Eclosion	0	3	1	4	124.829
CantonS	Eclosion	0	3	1	4	138.189
CantonS	Eclosion	0	3	1	4	257.035
CantonS	Eclosion	0	3	1	4	202.198
CantonS	Eclosion	0	3	1	4	183.055
CantonS	Eclosion	0	3	1	4	182.058
CantonS	Eclosion	0	3	1	4	161.719
CantonS	Eclosion	0	3	1	4	124.629
CantonS	Eclosion	0	3	1	4	236.297
CantonS	Eclosion	0	3	1	4	178.469
CantonS	Eclosion	0	3	1	4	96.513
CantonS	Eclosion	0	3	1	4	120.442
CantonS	Eclosion	0	3	1	4	100.9
CantonS	Eclosion	0	3	1	4	99.504
CantonS	Eclosion	0	3	1	4	81.557
CantonS	Eclosion	0	3	1	4	96.313
CantonS	Eclosion	0	3	1	4	69.194
CantonS	Eclosion	0	3	1	4	79.962
CantonS	Eclosion	0	3	1	4	89.733
CantonS	Eclosion	0	3	1	4	129.814
CantonS	Eclosion	0	3	1	4	96.114
CantonS	Eclosion	0	3	1	4	86.543
CantonS	Eclosion	0	3	1	4	223.535
CantonS	Eclosion	0	3	1	4	116.055
CantonS	Eclosion	0	3	1	4	106.084
CantonS	Eclosion	0	3	1	4	102.894
CantonS	Eclosion	0	3	1	4	142.975
CantonS	Eclosion	0	3	2	4	177.273
CantonS	Eclosion	0	3	2	4	88.935
CantonS	Eclosion	0	3	2	4	94.918
CantonS	Eclosion	0	3	2	4	132.207
CantonS	Eclosion	0	3	2	4	88.537
CantonS	Eclosion	0	3	2	4	60.021
CantonS	Eclosion	0	3	2	4	83.153
CantonS	Eclosion	0	3	2	4	123.632
CantonS	Eclosion	0	3	2	4	101.498
CantonS	Eclosion	0	3	2	4	91.328
CantonS	Eclosion	0	3	2	4	134.998
CantonS	Eclosion	0	3	2	4	67.2
CantonS	Eclosion	0	3	2	4	101.498
CantonS	Eclosion	0	3	2	4	107.281
CantonS	Eclosion	0	3	2	4	172.287
CantonS	Eclosion	0	3	2	4	86.941
CantonS	Eclosion	0	3	2	4	88.337
CantonS	Eclosion	0	3	2	4	76.373
CantonS	Eclosion	0	3	2	4	124.031
CantonS	Eclosion	0	3	2	4	89.534
CantonS	Eclosion	0	3	3	4	157.93
CantonS	Eclosion	0	3	3	4	156.335
CantonS	Eclosion	0	3	3	4	158.728
CantonS	Eclosion	0	3	3	4	110.272
CantonS	Eclosion	0	3	3	4	173.683
CantonS	Eclosion	0	3	3	4	164.311
CantonS	Eclosion	0	3	3	4	127.82
CantonS	Eclosion	0	3	3	4	134.799
CantonS	Eclosion	0	3	3	4	165.508
CantonS	Eclosion	0	3	3	4	140.582
CantonS	Eclosion	0	3	3	4	156.933
CantonS	Eclosion	0	3	3	4	170.094
CantonS	Eclosion	0	3	3	4	142.975
CantonS	Eclosion	0	3	3	4	159.326
CantonS	Eclosion	0	3	3	4	100.501
CantonS	Eclosion	0	3	3	4	206.785
CantonS	Eclosion	0	3	3	4	229.717
CantonS	Eclosion	0	3	3	4	105.486
CantonS	Eclosion	0	3	3	4	136.594
CantonS	Eclosion	0	3	3	4	111.668
CantonS	Eclosion	0	3	3	4	106.284
CantonS	Eclosion	0	3	3	4	147.76
CantonS	Eclosion	0	3	3	4	97.51
CantonS	Eclosion	0	3	3	4	98.706
CantonS	Eclosion	0	3	3	4	116.454
CantonS	Eclosion	0	3	3	4	146.165
CantonS	Eclosion	0	3	3	4	137.192
CantonS	Eclosion	0	3	3	4	149.555
CantonS	Eclosion	0	3	3	4	132.805
CantonS	Eclosion	0	3	3	4	94.918
CantonS	Eclosion	0	3	4	4	144.171
CantonS	Eclosion	0	3	4	4	178.469
CantonS	Eclosion	0	3	4	4	92.126
CantonS	Eclosion	0	3	4	4	190.832
CantonS	Eclosion	0	3	4	4	187.442
CantonS	Eclosion	0	3	4	4	108.876
CantonS	Eclosion	0	3	4	4	110.471
CantonS	Eclosion	0	3	4	4	107.48
CantonS	Eclosion	0	3	4	4	136.793
CantonS	Eclosion	0	3	4	4	176.076
CantonS	Eclosion	0	3	4	4	181.261
CantonS	Eclosion	0	3	4	4	146.564
CantonS	Eclosion	0	3	4	4	145.966
CantonS	Eclosion	0	3	4	4	154.939
CantonS	Eclosion	0	3	4	4	107.48
CantonS	Eclosion	0	3	4	4	165.906
CantonS	Eclosion	0	3	4	4	58.227
CantonS	Eclosion	0	3	4	4	79.164
CantonS	Eclosion	0	3	4	4	68.397
CantonS	Eclosion	0	3	4	4	59.024
CantonS	Eclosion	0	3	4	4	74.977
CantonS	Eclosion	0	3	4	4	105.087
CantonS	Eclosion	0	3	4	4	116.454
CantonS	Eclosion	0	3	4	4	141.579
CantonS	Eclosion	0	3	4	4	172.088
CantonS	Eclosion	0	3	4	4	169.496
CantonS	Eclosion	0	3	4	4	155.138
CantonS	Eclosion	0	3	4	4	88.337
CantonS	Eclosion	0	3	4	4	72.385
CantonS	Eclosion	0	3	4	4	94.12
CantonS	Eclosion	0	3	5	4	173.883
CantonS	Eclosion	0	3	5	4	95.915
CantonS	Eclosion	0	3	5	4	75.376
CantonS	Eclosion	0	3	5	4	118.647
CantonS	Eclosion	0	3	5	4	89.334
CantonS	Eclosion	0	3	5	4	134.799
CantonS	Eclosion	0	3	5	4	122.835
CantonS	Eclosion	0	3	5	4	243.276
CantonS	Eclosion	0	3	5	4	113.064
CantonS	Eclosion	0	3	5	4	85.147
CantonS	Eclosion	0	3	5	4	125.427
CantonS	Eclosion	0	3	5	4	140.382
CantonS	Eclosion	0	3	5	4	98.507
CantonS	Eclosion	0	3	5	4	126.823
CantonS	Eclosion	0	3	5	4	141.18
CantonS	Eclosion	0	3	5	4	85.745
CantonS	Eclosion	0	3	5	4	103.093
CantonS	Eclosion	0	3	5	4	103.093
CantonS	Eclosion	0	3	5	4	248.86
CantonS	Eclosion	0	3	5	4	140.382
CantonS	Eclosion	0	3	5	4	152.347
CantonS	Eclosion	0	3	5	4	163.115
CantonS	Eclosion	0	3	5	4	136.992
CantonS	Eclosion	0	3	5	4	203.195
CantonS	Eclosion	0	3	5	4	115.855
CantonS	Eclosion	0	3	5	4	142.177
CantonS	Eclosion	0	3	5	4	185.249
CantonS	Eclosion	0	3	5	4	181.261
CantonS	Eclosion	0	3	5	4	119.245
CantonS	Eclosion	0	3	5	4	107.081
CantonS	Eclosion	0	3	6	4	191.231
CantonS	Eclosion	0	3	6	4	158.528
CantonS	Eclosion	0	3	6	4	159.924
CantonS	Eclosion	0	3	6	4	96.313
CantonS	Eclosion	0	3	6	4	61.617
CantonS	Eclosion	0	3	6	4	93.322
CantonS	Eclosion	0	3	6	4	96.712
CantonS	Eclosion	0	3	6	4	100.102
CantonS	Eclosion	0	3	6	4	136.394
CantonS	Eclosion	0	3	6	4	120.442
CantonS	Eclosion	0	3	6	4	163.912
CantonS	Eclosion	0	3	6	4	111.867
CantonS	Eclosion	0	3	6	4	168.897
CantonS	Eclosion	0	3	6	4	79.364
CantonS	Eclosion	0	3	6	4	166.305
CantonS	Eclosion	0	3	6	4	186.445
CantonS	Eclosion	0	3	6	4	176.674
CantonS	Eclosion	0	3	6	4	88.138
CantonS	Eclosion	0	3	6	4	122.436
CantonS	Eclosion	0	3	6	4	89.733
CantonS	Eclosion	0	3	6	4	97.709
[truncated: 880 more rows]
