# Supplementary material for: Multiscale analysis reveals that diet-dependent midgut plasticity emerges from alterations in both stem cell niche coupling and enterocyte size
Source: eLife. 2021 Sep 23;10:e64125. doi: 10.7554/eLife.64125 (PMC8528489; doi:10.7554/eLife.64125)
Supplement: Figure 7—figure supplement 2—source data 1. [file elife-64125-fig7-figsupp2-data1.csv]

Repeat	Diet	Region	Mean
1	HS	4	16.72
1	HS	4	15.24
1	HS	4	22.758
1	HS	4	18.154
1	HS	4	18.875
1	HS	4	24.163
2	HS	4	20.61
2	HS	4	20.61
2	HS	4	10.649
2	HS	4	27.764
2	HS	4	18.558
2	HS	4	25.215
2	HS	4	20.904
3	HS	4	19.297
3	HS	4	16.6
3	HS	4	28.714
3	HS	4	14.986
3	HS	4	15.866
3	HS	4	25.592
3	HS	4	20.082
1	HY	4	4.752
1	HY	4	6.901
1	HY	4	4.62
1	HY	4	8.194
1	HY	4	5.165
1	HY	4	3.483
1	HY	4	4.526
1	HY	4	2.665
2	HY	4	6.262
2	HY	4	5.715
2	HY	4	3.631
2	HY	4	1.783
2	HY	4	2.227
2	HY	4	6.419
2	HY	4	5.059
3	HY	4	20.277
3	HY	4	14.11
3	HY	4	16.566
3	HY	4	8.632
3	HY	4	16.226
3	HY	4	12.613
3	HY	4	14.001
3	HY	4	13.235
3	HY	4	13.913
