# Supplementary material for: Multiscale analysis reveals that diet-dependent midgut plasticity emerges from alterations in both stem cell niche coupling and enterocyte size
Source: eLife. 2021 Sep 23;10:e64125. doi: 10.7554/eLife.64125 (PMC8528489; doi:10.7554/eLife.64125)
Supplement: Figure 7—figure supplement 2—source data 3. [file elife-64125-fig7-figsupp2-data3.csv]

Female.Line	Male.Line	Diet	Treatment	Day	Repeat	Total.L
5966	Atg8a-IR	HY	RU486	0	1	3896.633
5966	Atg8a-IR	HY	RU486	0	1	5648.538
5966	Atg8a-IR	HY	RU486	0	1	5915.993
5966	Atg8a-IR	HY	RU486	0	1	5060.044
5966	Atg8a-IR	HY	RU486	0	1	6001.204
5966	Atg8a-IR	HY	RU486	0	1	6232.895
5966	Atg8a-IR	HY	RU486	0	1	4568.705
5966	Atg8a-IR	HY	RU486	0	1	6118.15
5966	Atg8a-IR	HY	RU486	0	1	5713.112
5966	Atg8a-IR	HY	RU486	0	1	5604.031
5966	Atg8a-IR	HY	RU486	0	1	5424.893
5966	Atg8a-IR	HY	Ethanol	0	1	5462.463
5966	Atg8a-IR	HY	Ethanol	0	1	5521.993
5966	Atg8a-IR	HY	Ethanol	0	1	6063.417
5966	Atg8a-IR	HY	Ethanol	0	1	5056.764
5966	Atg8a-IR	HY	Ethanol	0	1	6117.082
5966	Atg8a-IR	HY	Ethanol	0	1	5197.425
5966	Atg8a-IR	HY	Ethanol	0	1	6000.466
5966	Atg8a-IR	HY	Ethanol	0	1	5950.433
5966	Atg8a-IR	HY	Ethanol	0	1	5816.641
5966	Atg8a-IR	HY	Ethanol	0	1	6478.644
5966	Atg8a-IR	HY	RU486	0	2	5163.003
5966	Atg8a-IR	HY	RU486	0	2	5509.809
5966	Atg8a-IR	HY	RU486	0	2	5586.806
5966	Atg8a-IR	HY	RU486	0	2	5033.478
5966	Atg8a-IR	HY	RU486	0	2	4957.826
5966	Atg8a-IR	HY	RU486	0	2	6038.613
5966	Atg8a-IR	HY	RU486	0	2	5540.875
5966	Atg8a-IR	HY	RU486	0	2	5484.72
5966	Atg8a-IR	HY	Ethanol	0	2	5696.223
5966	Atg8a-IR	HY	Ethanol	0	2	6240.812
5966	Atg8a-IR	HY	Ethanol	0	2	6272.548
5966	Atg8a-IR	HY	Ethanol	0	2	6257.592
5966	Atg8a-IR	HY	Ethanol	0	2	5490.254
5966	Atg8a-IR	HY	Ethanol	0	2	5738.811
5966	Atg8a-IR	HY	Ethanol	0	2	6092.701
5966	Atg8a-IR	HY	Ethanol	0	2	5936.308
5966	Atg8a-IR	HY	RU486	0	3	5886.526
5966	Atg8a-IR	HY	RU486	0	3	5916.797
5966	Atg8a-IR	HY	RU486	0	3	7185.764
5966	Atg8a-IR	HY	RU486	0	3	6688.366
5966	Atg8a-IR	HY	RU486	0	3	6946.029
5966	Atg8a-IR	HY	RU486	0	3	7205.27
5966	Atg8a-IR	HY	Ethanol	0	3	5623.204
5966	Atg8a-IR	HY	Ethanol	0	3	6176.47
5966	Atg8a-IR	HY	Ethanol	0	3	6352.286
5966	Atg8a-IR	HY	Ethanol	0	3	5577.566
5966	Atg8a-IR	HY	Ethanol	0	3	5631.228
5966	Atg8a-IR	HY	Ethanol	0	3	6097.714
5966	Atg8a-IR	HY	Ethanol	0	3	5332.328
5966	Atg8a-IR	HYtoHS	RU486	7	1	4027.39
5966	Atg8a-IR	HYtoHS	RU486	7	1	4261.474
5966	Atg8a-IR	HYtoHS	RU486	7	1	5740.876
5966	Atg8a-IR	HYtoHS	RU486	7	1	5156.201
5966	Atg8a-IR	HYtoHS	RU486	7	1	4381.535
5966	Atg8a-IR	HYtoHS	RU486	7	1	5284.817
5966	Atg8a-IR	HYtoHS	RU486	7	1	5476.583
5966	Atg8a-IR	HYtoHS	RU486	7	1	5630.274
5966	Atg8a-IR	HYtoHS	RU486	7	1	4171.101
5966	Atg8a-IR	HYtoHS	RU486	7	1	4023.359
5966	Atg8a-IR	HYtoHS	Ethanol	7	1	4882.723
5966	Atg8a-IR	HYtoHS	Ethanol	7	1	4018.707
5966	Atg8a-IR	HYtoHS	Ethanol	7	1	3156.453
5966	Atg8a-IR	HYtoHS	Ethanol	7	1	4114.184
5966	Atg8a-IR	HYtoHS	Ethanol	7	1	4209.75
5966	Atg8a-IR	HYtoHS	Ethanol	7	1	5258.513
5966	Atg8a-IR	HYtoHS	Ethanol	7	1	3590.259
5966	Atg8a-IR	HYtoHS	Ethanol	7	1	4553.514
5966	Atg8a-IR	HYtoHS	Ethanol	7	1	4310.135
5966	Atg8a-IR	HYtoHS	RU486	7	2	4711.796
5966	Atg8a-IR	HYtoHS	RU486	7	2	5563.855
5966	Atg8a-IR	HYtoHS	RU486	7	2	4409.509
5966	Atg8a-IR	HYtoHS	RU486	7	2	4912.711
5966	Atg8a-IR	HYtoHS	RU486	7	2	4372.217
5966	Atg8a-IR	HYtoHS	RU486	7	2	4765.285
5966	Atg8a-IR	HYtoHS	RU486	7	2	4416.903
5966	Atg8a-IR	HYtoHS	RU486	7	2	5296.342
5966	Atg8a-IR	HYtoHS	RU486	7	2	5136.073
5966	Atg8a-IR	HYtoHS	RU486	7	2	4771.282
5966	Atg8a-IR	HYtoHS	Ethanol	7	2	4431.809
5966	Atg8a-IR	HYtoHS	Ethanol	7	2	5456.161
5966	Atg8a-IR	HYtoHS	Ethanol	7	2	4432.744
5966	Atg8a-IR	HYtoHS	Ethanol	7	2	4570.587
5966	Atg8a-IR	HYtoHS	Ethanol	7	2	4818.348
5966	Atg8a-IR	HYtoHS	Ethanol	7	2	4614.806
5966	Atg8a-IR	HYtoHS	Ethanol	7	2	4443.975
5966	Atg8a-IR	HYtoHS	Ethanol	7	2	4359.02
5966	Atg8a-IR	HYtoHS	Ethanol	7	2	4478.134
5966	Atg8a-IR	HYtoHS	Ethanol	7	2	5347.938
5966	Atg8a-IR	HYtoHS	RU486	7	3	5447.932
5966	Atg8a-IR	HYtoHS	RU486	7	3	4904.791
5966	Atg8a-IR	HYtoHS	RU486	7	3	5118.421
5966	Atg8a-IR	HYtoHS	RU486	7	3	3706.537
5966	Atg8a-IR	HYtoHS	RU486	7	3	4977.484
5966	Atg8a-IR	HYtoHS	RU486	7	3	4788.531
5966	Atg8a-IR	HYtoHS	RU486	7	3	5285.374
5966	Atg8a-IR	HYtoHS	RU486	7	3	4227.461
5966	Atg8a-IR	HYtoHS	Ethanol	7	3	4655.564
5966	Atg8a-IR	HYtoHS	Ethanol	7	3	4134.965
5966	Atg8a-IR	HYtoHS	Ethanol	7	3	5052.113
5966	Atg8a-IR	HYtoHS	Ethanol	7	3	4270.203
5966	Atg8a-IR	HYtoHS	Ethanol	7	3	4695.274
5966	Atg8a-IR	HYtoHS	Ethanol	7	3	4841.451
5966	Atg8a-IR	HYtoHS	Ethanol	7	3	3796.777
