# Supplementary material for: Multiscale analysis reveals that diet-dependent midgut plasticity emerges from alterations in both stem cell niche coupling and enterocyte size
Source: eLife. 2021 Sep 23;10:e64125. doi: 10.7554/eLife.64125 (PMC8528489; doi:10.7554/eLife.64125)
Supplement: Figure 7—source data 1. [file elife-64125-fig7-data1.csv]

Male.Line	Gut	Region	RegionN	Area	GFP	CellNumber
Rheb-OE	1	2	0	1193.226	Yes	1
Rheb-OE	1	2	0	447.899	No	1
Rheb-OE	1	2	0	445.261	No	1
Rheb-OE	1	2	0	299.284	No	1
Rheb-OE	1	2	0	690.707	No	1
Rheb-OE	1	2	0	1280.383	Yes	2
Rheb-OE	1	2	0	555.38	No	2
Rheb-OE	1	2	0	350.092	No	2
Rheb-OE	1	2	0	546.879	No	2
Rheb-OE	1	2	0	586.744	No	2
Rheb-OE	1	2	0	570.231	No	2
Rheb-OE	1	2	0	603.062	Yes	3
Rheb-OE	1	2	0	450.147	No	3
Rheb-OE	1	2	0	782.358	No	3
Rheb-OE	1	2	0	873.033	No	3
Rheb-OE	1	2	0	589.578	No	3
Rheb-OE	1	2	0	484.834	No	3
Rheb-OE	1	2	0	656.704	No	1
Rheb-OE	1	4	1	1227.229	Yes	1
Rheb-OE	1	4	1	260.2	No	1
Rheb-OE	1	4	1	312.474	No	1
Rheb-OE	1	4	1	343.253	No	1
Rheb-OE	1	4	1	399.826	No	1
Rheb-OE	1	4	1	380.773	No	1
Rheb-OE	1	4	1	646.64	Yes	2
Rheb-OE	1	4	1	213.593	No	2
Rheb-OE	1	4	1	472.229	No	2
Rheb-OE	1	4	1	294.594	No	2
Rheb-OE	1	4	1	305.439	No	2
Rheb-OE	1	4	1	368.559	No	2
Rheb-OE	1	4	1	1138.02	Yes	3
Rheb-OE	1	4	1	174.802	No	3
Rheb-OE	1	4	1	236.945	No	3
Rheb-OE	1	4	1	260.004	No	3
Rheb-OE	1	4	1	335.436	No	3
Rheb-OE	1	4	1	462.556	No	3
Rheb-OE	1	4	1	1035.035	Yes	4
Rheb-OE	1	4	1	427.967	No	4
Rheb-OE	1	4	1	505.646	No	4
Rheb-OE	1	4	1	356.053	No	4
Rheb-OE	1	4	1	301.335	No	4
Rheb-OE	1	4	1	343.448	No	4
Rheb-OE	1	4	1	665.693	Yes	5
Rheb-OE	1	4	1	212.42	No	5
Rheb-OE	1	4	1	241.831	No	5
Rheb-OE	1	4	1	304.853	No	5
Rheb-OE	1	4	1	189.654	No	5
Rheb-OE	1	4	1	266.942	No	5
Rheb-OE	1	4	2	1383.368	Yes	1
Rheb-OE	1	4	2	271.436	No	1
Rheb-OE	1	4	2	352.34	No	1
Rheb-OE	1	4	2	589.187	No	1
Rheb-OE	1	4	2	418.782	No	1
Rheb-OE	1	4	2	488.742	No	1
Rheb-OE	1	4	2	826.718	Yes	2
Rheb-OE	1	4	2	370.221	No	2
Rheb-OE	1	4	2	233.916	No	2
Rheb-OE	1	4	2	217.305	No	2
Rheb-OE	1	4	2	244.859	No	2
Rheb-OE	1	4	2	494.995	No	2
Rheb-OE	1	4	2	655.825	Yes	3
Rheb-OE	1	4	2	277.494	No	3
Rheb-OE	1	4	2	414.678	No	3
Rheb-OE	1	4	2	321.561	No	3
Rheb-OE	1	4	2	360.645	No	3
Rheb-OE	1	4	2	420.639	No	3
Rheb-OE	1	4	0	1022.625	Yes	1
Rheb-OE	1	4	0	474.379	No	1
Rheb-OE	1	4	0	483.172	No	1
Rheb-OE	1	4	0	395.43	No	1
Rheb-OE	1	4	0	453.371	No	1
Rheb-OE	1	4	0	565.737	No	1
Rheb-OE	1	5	0	808.544	Yes	1
Rheb-OE	1	5	0	472.327	No	1
Rheb-OE	1	5	0	376.669	No	1
Rheb-OE	1	5	0	488.351	No	1
Rheb-OE	1	5	0	353.024	No	1
Rheb-OE	1	5	0	454.739	No	1
Rheb-OE	1	5	0	597.883	Yes	2
Rheb-OE	1	5	0	314.722	No	2
Rheb-OE	1	5	0	392.01	No	2
Rheb-OE	1	5	0	377.353	No	2
Rheb-OE	1	5	0	260.591	No	2
Rheb-OE	1	5	0	365.335	No	2
Rheb-OE	1	5	0	517.664	Yes	3
Rheb-OE	1	5	0	152.817	No	3
Rheb-OE	1	5	0	241.44	No	3
Rheb-OE	1	5	0	176.952	No	3
Rheb-OE	1	5	0	205.873	No	3
Rheb-OE	1	5	0	131.908	No	3
Rheb-OE	1	5	0	241.44	Yes	4
Rheb-OE	1	5	0	193.171	No	4
Rheb-OE	1	5	0	127.511	No	4
Rheb-OE	1	5	0	244.371	No	4
Rheb-OE	1	5	0	295.18	No	4
Rheb-OE	1	5	0	353.121	No	4
Rheb-OE	1	5	0	427.674	Yes	5
Rheb-OE	1	5	0	128.292	No	5
Rheb-OE	1	5	0	218.771	No	5
Rheb-OE	1	5	0	198.838	No	5
Rheb-OE	1	5	0	385.268	No	5
Rheb-OE	1	5	0	109.825	No	5
Rheb-OE	2	1	0	679.373	Yes	1
Rheb-OE	2	1	0	289.22	No	1
Rheb-OE	2	1	0	334.752	No	1
Rheb-OE	2	1	0	123.895	No	1
Rheb-OE	2	1	0	143.242	No	1
Rheb-OE	2	1	0	193.953	No	1
Rheb-OE	2	1	0	363.185	Yes	2
Rheb-OE	2	1	0	202.258	No	2
Rheb-OE	2	1	0	300.945	No	2
Rheb-OE	2	1	0	177.636	No	2
Rheb-OE	2	1	0	94.876	No	2
Rheb-OE	2	1	0	183.01	No	2
Rheb-OE	2	2	1	814.7	Yes	1
Rheb-OE	2	2	1	440.083	No	1
Rheb-OE	2	2	1	426.794	No	1
Rheb-OE	2	2	1	411.552	No	1
Rheb-OE	2	2	1	400.12	No	1
Rheb-OE	2	2	1	371.784	No	1
Rheb-OE	2	2	0	347.357	Yes	1
Rheb-OE	2	2	0	133.764	No	1
Rheb-OE	2	2	0	172.164	No	1
Rheb-OE	2	2	0	132.885	No	1
Rheb-OE	2	2	0	129.172	No	1
Rheb-OE	2	2	0	112.952	No	1
Rheb-OE	2	3	0	940.452	Yes	1
Rheb-OE	2	3	0	595.636	No	1
Rheb-OE	2	3	0	637.651	No	1
Rheb-OE	2	3	0	454.837	No	1
Rheb-OE	2	3	0	436.37	No	1
Rheb-OE	2	3	0	520.595	No	1
Rheb-OE	2	3	0	925.893	Yes	2
Rheb-OE	2	3	0	295.375	No	2
Rheb-OE	2	3	0	404.028	No	2
Rheb-OE	2	3	0	368.95	No	2
Rheb-OE	2	3	0	408.816	No	2
Rheb-OE	2	3	0	510.336	No	2
Rheb-OE	2	4	0	1262.111	Yes	1
Rheb-OE	2	4	0	516.882	No	1
Rheb-OE	2	4	0	649.278	No	1
Rheb-OE	2	4	0	447.02	No	1
Rheb-OE	2	4	0	679.959	No	1
Rheb-OE	2	4	0	470.861	No	1
Rheb-OE	2	4	1	1070.21	Yes	1
Rheb-OE	2	4	1	378.526	No	1
Rheb-OE	2	4	1	539.942	No	1
Rheb-OE	2	4	1	551.276	No	1
Rheb-OE	2	4	1	360.84	No	1
Rheb-OE	2	4	1	250.722	No	1
Rheb-OE	2	4	1	1037.77	Yes	2
Rheb-OE	2	4	1	298.893	No	2
Rheb-OE	2	4	1	388.101	No	2
Rheb-OE	2	4	1	153.404	No	2
Rheb-OE	2	4	1	248.768	No	2
Rheb-OE	2	4	1	405.103	No	2
Rheb-OE	2	4	1	732.917	Yes	3
Rheb-OE	2	4	1	228.347	No	3
Rheb-OE	2	4	1	241.342	No	3
Rheb-OE	2	4	1	307.784	No	3
Rheb-OE	2	4	1	256.975	No	3
Rheb-OE	2	4	1	213.886	No	3
Rheb-OE	2	4	1	976.604	Yes	4
Rheb-OE	2	4	1	265.574	No	4
Rheb-OE	2	4	1	296.255	No	4
Rheb-OE	2	4	1	230.496	No	4
Rheb-OE	2	4	1	268.212	No	4
Rheb-OE	2	4	1	330.551	No	4
Rheb-OE	2	4	1	452.687	Yes	5
Rheb-OE	2	4	1	328.987	No	5
Rheb-OE	2	4	1	321.17	No	5
Rheb-OE	2	4	1	299.186	No	5
Rheb-OE	2	4	1	308.077	No	5
Rheb-OE	2	4	1	197.177	No	5
Rheb-OE	2	5	0	1344.578	Yes	1
Rheb-OE	2	5	0	244.469	No	1
Rheb-OE	2	5	0	296.255	No	1
Rheb-OE	2	5	0	484.54	No	1
Rheb-OE	2	5	0	466.562	No	1
Rheb-OE	2	5	0	379.405	No	1
Rheb-OE	3	1	0	259.516	Yes	1
Rheb-OE	3	1	0	258.734	No	1
Rheb-OE	3	1	0	170.991	No	1
Rheb-OE	3	1	0	219.553	No	1
Rheb-OE	3	1	0	267.235	No	1
Rheb-OE	3	1	0	729.4	Yes	2
Rheb-OE	3	1	0	279.839	No	2
Rheb-OE	3	1	0	259.809	No	2
Rheb-OE	3	1	0	248.084	No	2
Rheb-OE	3	1	0	269.971	No	2
Rheb-OE	3	1	0	229.715	No	2
Rheb-OE	3	2	1	918.37	Yes	1
Rheb-OE	3	2	1	466.171	No	1
Rheb-OE	3	2	1	391.033	No	1
Rheb-OE	3	2	1	379.503	No	1
Rheb-OE	3	2	1	359.375	No	1
Rheb-OE	3	2	1	478.971	No	1
Rheb-OE	3	3	0	555.477	Yes	1
Rheb-OE	3	3	0	713.571	No	1
Rheb-OE	3	3	0	838.932	No	1
Rheb-OE	3	3	0	892.965	No	1
Rheb-OE	3	3	0	870.297	No	1
Rheb-OE	3	3	0	677.907	No	1
Rheb-OE	3	4	0	1898.98	Yes	1
Rheb-OE	3	4	0	281.598	No	1
Rheb-OE	3	4	0	403.051	No	1
Rheb-OE	3	4	0	457.475	No	1
Rheb-OE	3	4	0	369.341	No	1
Rheb-OE	3	4	0	383.607	No	1
Rheb-OE	3	4	0	945.337	Yes	2
Rheb-OE	3	4	0	536.229	No	2
Rheb-OE	3	4	0	641.168	No	2
Rheb-OE	3	4	0	630.225	No	2
Rheb-OE	3	4	0	531.636	No	2
Rheb-OE	3	4	0	323.809	No	2
Rheb-OE	3	4	0	1909.142	Yes	3
Rheb-OE	3	4	0	448.486	No	3
Rheb-OE	3	4	0	721.29	No	3
Rheb-OE	3	4	0	510.531	No	3
Rheb-OE	3	4	0	548.247	No	3
Rheb-OE	3	4	0	470.959	No	3
Rheb-OE	3	4	0	1006.992	Yes	4
Rheb-OE	3	4	0	447.899	No	4
Rheb-OE	3	4	0	368.364	No	4
Rheb-OE	3	4	0	923.353	No	4
Rheb-OE	3	4	0	917.002	No	4
Rheb-OE	3	4	0	656.118	No	4
Rheb-OE	3	4	0	1193.031	Yes	5
Rheb-OE	3	4	0	591.239	No	5
Rheb-OE	3	4	0	489.133	No	5
Rheb-OE	3	4	0	446.336	No	5
Rheb-OE	3	4	0	789.1	No	5
Rheb-OE	3	4	0	405.298	No	5
Rheb-OE	3	5	0	1444.046	Yes	1
Rheb-OE	3	5	0	404.614	No	1
Rheb-OE	3	5	0	429.921	No	1
Rheb-OE	3	5	0	280.523	No	1
Rheb-OE	3	5	0	441.353	No	1
Rheb-OE	3	5	0	589.382	No	1
Rheb-OE	3	5	0	387.906	Yes	2
Rheb-OE	3	5	0	254.337	No	2
Rheb-OE	3	5	0	354.489	No	2
Rheb-OE	3	5	0	318.044	No	2
Rheb-OE	3	5	0	298.502	No	2
Rheb-OE	3	5	0	250.82	No	2
Rheb-OE	3	5	0	575.41	Yes	3
Rheb-OE	3	5	0	302.41	No	3
Rheb-OE	3	5	0	285.604	No	3
Rheb-OE	3	5	0	381.457	No	3
Rheb-OE	3	5	0	396.895	No	3
Rheb-OE	3	5	0	283.064	No	3
Tor-IR	1	2	0	243.785	Yes	1
Tor-IR	1	2	0	223.363	No	1
Tor-IR	1	2	0	200.89	No	1
Tor-IR	1	2	0	375.204	No	1
Tor-IR	1	2	0	116.079	No	1
Tor-IR	1	2	0	161.025	No	1
Tor-IR	1	2	0	115.786	Yes	2
Tor-IR	1	2	0	199.327	No	2
Tor-IR	1	2	0	170.014	No	2
Tor-IR	1	2	0	271.827	No	2
Tor-IR	1	2	0	411.942	No	2
Tor-IR	1	2	0	236.359	No	2
Tor-IR	1	4	1	130.93	Yes	1
Tor-IR	1	4	1	170.6	No	1
Tor-IR	1	4	1	202.845	No	1
Tor-IR	1	4	1	298.404	No	1
Tor-IR	1	4	1	367.973	No	1
Tor-IR	1	4	1	289.806	No	1
Tor-IR	1	4	2	90.577	Yes	1
Tor-IR	1	4	2	592.118	No	1
Tor-IR	1	4	2	474.476	No	1
Tor-IR	1	4	2	490.305	No	1
Tor-IR	1	4	2	430.214	No	1
Tor-IR	1	4	2	606.286	No	1
Tor-IR	1	4	2	51.981	Yes	2
Tor-IR	1	4	2	489.719	No	2
Tor-IR	1	4	2	569.352	No	2
Tor-IR	1	4	2	586.06	No	2
Tor-IR	1	4	2	656.704	No	2
Tor-IR	1	4	2	653.48	No	2
Tor-IR	1	4	2	90.479	Yes	3
Tor-IR	1	4	2	570.036	No	3
Tor-IR	1	4	2	540.723	No	3
Tor-IR	1	4	2	672.631	No	3
Tor-IR	1	4	2	695.495	No	3
Tor-IR	1	4	2	420.541	No	3
Tor-IR	1	4	2	63.413	Yes	4
Tor-IR	1	4	2	361.622	No	4
Tor-IR	1	4	2	276.029	No	4
Tor-IR	1	4	2	358.007	No	4
Tor-IR	1	4	2	677.907	No	4
Tor-IR	1	4	2	370.611	No	4
Tor-IR	1	4	0	100.152	Yes	1
Tor-IR	1	4	0	402.562	No	1
Tor-IR	1	4	0	458.159	No	1
Tor-IR	1	4	0	413.213	No	1
Tor-IR	1	4	0	401.097	No	1
Tor-IR	1	4	0	306.026	No	1
Tor-IR	1	5	0	164.836	Yes	1
Tor-IR	1	5	0	244.566	No	1
Tor-IR	1	5	0	166.204	No	1
Tor-IR	1	5	0	404.907	No	1
Tor-IR	1	5	0	78.461	No	1
Tor-IR	1	5	0	92.042	No	1
Tor-IR	1	5	0	144.707	Yes	2
Tor-IR	1	5	0	158.582	No	2
Tor-IR	1	5	0	273.488	No	2
Tor-IR	1	5	0	353.317	No	2
Tor-IR	1	5	0	84.323	No	2
Tor-IR	1	5	0	83.541	No	2
Tor-IR	2	2	1	221.409	Yes	1
Tor-IR	2	2	1	344.034	No	1
Tor-IR	2	2	1	397.579	No	1
Tor-IR	2	2	1	365.433	No	1
Tor-IR	2	2	1	501.249	No	1
Tor-IR	2	2	1	476.04	No	1
Tor-IR	2	2	2	106.796	Yes	1
Tor-IR	2	2	2	480.73	No	1
Tor-IR	2	2	2	436.077	No	1
Tor-IR	2	2	2	344.425	No	1
Tor-IR	2	2	2	330.941	No	1
Tor-IR	2	2	2	459.038	No	1
Tor-IR	2	2	2	117.935	Yes	2
Tor-IR	2	2	2	374.324	No	2
Tor-IR	2	2	2	361.524	No	2
Tor-IR	2	2	2	579.416	No	2
Tor-IR	2	2	2	493.725	No	2
Tor-IR	2	2	2	526.849	No	2
Tor-IR	2	2	3	163.663	Yes	1
Tor-IR	2	2	3	274.075	No	1
Tor-IR	2	2	3	705.657	No	1
Tor-IR	2	2	3	922.083	No	1
Tor-IR	2	2	3	417.414	No	1
Tor-IR	2	2	3	352.242	No	1
Tor-IR	2	2	0	226.783	Yes	1
Tor-IR	2	2	0	376.376	No	1
Tor-IR	2	2	0	388.101	No	1
Tor-IR	2	2	0	412.431	No	1
Tor-IR	2	2	0	741.907	No	1
Tor-IR	2	2	0	402.562	No	1
Tor-IR	2	4	1	118.912	Yes	1
Tor-IR	2	4	1	1063.957	No	1
Tor-IR	2	4	1	473.108	No	1
Tor-IR	2	4	1	393.964	No	1
Tor-IR	2	4	1	441.255	No	1
Tor-IR	2	4	1	545.413	No	1
Tor-IR	2	4	0	171.48	Yes	1
Tor-IR	2	4	0	280.523	No	1
Tor-IR	2	4	0	560.265	No	1
Tor-IR	2	4	0	565.444	No	1
Tor-IR	2	4	0	533.493	No	1
Tor-IR	2	4	0	706.047	No	1
Tor-IR	3	2	0	99.566	Yes	1
Tor-IR	3	2	0	409.011	No	1
Tor-IR	3	2	0	414.874	No	1
Tor-IR	3	2	0	378.135	No	1
Tor-IR	3	2	0	555.575	No	1
Tor-IR	3	2	0	454.739	No	1
Tor-IR	3	2	0	174.997	Yes	2
Tor-IR	3	2	0	382.727	No	2
Tor-IR	3	2	0	406.275	No	2
Tor-IR	3	2	0	535.74	No	2
Tor-IR	3	2	0	423.081	No	2
Tor-IR	3	2	0	465.683	No	2
Tor-IR	3	4	1	174.216	Yes	1
Tor-IR	3	4	1	458.843	No	1
Tor-IR	3	4	1	389.86	No	1
Tor-IR	3	4	1	413.897	No	1
Tor-IR	3	4	1	299.772	No	1
Tor-IR	3	4	1	208.512	No	1
Tor-IR	3	4	1	232.255	Yes	2
Tor-IR	3	4	1	234.6	No	2
Tor-IR	3	4	1	513.951	No	2
Tor-IR	3	4	1	370.514	No	2
Tor-IR	3	4	1	484.443	No	2
Tor-IR	3	4	1	503.887	No	2
Tor-IR	3	4	2	76.311	Yes	1
Tor-IR	3	4	2	423.277	No	1
Tor-IR	3	4	2	428.455	No	1
Tor-IR	3	4	2	387.515	No	1
Tor-IR	3	4	2	482.586	No	1
Tor-IR	3	4	2	478.385	No	1
Tor-IR	3	4	2	124.97	Yes	2
Tor-IR	3	4	2	402.465	No	2
Tor-IR	3	4	2	377.549	No	2
Tor-IR	3	4	2	421.225	No	2
Tor-IR	3	4	2	385.17	No	2
Tor-IR	3	4	2	497.047	No	2
Tor-IR	3	4	2	72.793	Yes	3
Tor-IR	3	4	2	591.239	No	3
Tor-IR	3	4	2	612.735	No	3
Tor-IR	3	4	2	567.789	No	3
Tor-IR	3	4	2	467.539	No	3
Tor-IR	3	4	2	463.142	No	3
Tor-IR	3	4	2	101.227	Yes	4
Tor-IR	3	4	2	557.822	No	4
Tor-IR	3	4	2	696.667	No	4
Tor-IR	3	4	2	603.746	No	4
Tor-IR	3	4	2	477.212	No	4
Tor-IR	3	4	2	583.52	No	4
Tor-IR	3	4	3	115.883	Yes	1
Tor-IR	3	4	3	570.622	No	1
Tor-IR	3	4	3	552.058	No	1
Tor-IR	3	4	3	452.883	No	1
Tor-IR	3	4	3	626.61	No	1
Tor-IR	3	4	3	496.656	No	1
Tor-IR	3	4	4	104.94	Yes	1
Tor-IR	3	4	4	733.895	No	1
Tor-IR	3	4	4	484.247	No	1
Tor-IR	3	4	4	627.098	No	1
Tor-IR	3	4	4	666.28	No	1
Tor-IR	3	4	4	557.822	No	1
Tor-IR	3	4	0	86.473	Yes	1
Tor-IR	3	4	0	412.626	No	1
Tor-IR	3	4	0	522.158	No	1
Tor-IR	3	4	0	378.624	No	1
Tor-IR	3	4	0	519.911	No	1
Tor-IR	3	4	0	215.058	No	1
Tor-IR	3	4	0	54.522	Yes	2
Tor-IR	3	4	0	630.518	No	2
Tor-IR	3	4	0	549.029	No	2
Tor-IR	3	4	0	483.075	No	2
Tor-IR	3	4	0	650.06	No	2
Tor-IR	3	4	0	508.675	No	2
Tor-IR	5	2	1	191.315	Yes	1
Tor-IR	5	2	1	474.867	No	1
Tor-IR	5	2	1	248.475	No	1
Tor-IR	5	2	1	332.602	No	1
Tor-IR	5	2	1	283.357	No	1
Tor-IR	5	2	1	204.896	No	1
Tor-IR	5	2	1	120.28	Yes	2
Tor-IR	5	2	1	214.765	No	2
Tor-IR	5	2	1	223.559	No	2
Tor-IR	5	2	1	315.503	No	2
Tor-IR	5	2	1	302.215	No	2
Tor-IR	5	2	1	455.228	No	2
Tor-IR	5	2	1	91.847	Yes	3
Tor-IR	5	2	1	395.234	No	3
Tor-IR	5	2	1	168.939	No	3
Tor-IR	5	2	1	315.406	No	3
Tor-IR	5	2	1	294.594	No	3
Tor-IR	5	2	1	535.935	No	3
Tor-IR	5	2	2	89.013	Yes	1
Tor-IR	5	2	2	247.791	No	1
Tor-IR	5	2	2	309.055	No	1
Tor-IR	5	2	2	294.3	No	1
Tor-IR	5	2	2	525.578	No	1
Tor-IR	5	2	2	334.361	No	1
Tor-IR	5	2	2	132.689	Yes	2
Tor-IR	5	2	2	223.852	No	2
Tor-IR	5	2	2	274.368	No	2
Tor-IR	5	2	2	312.572	No	2
Tor-IR	5	2	2	338.074	No	2
Tor-IR	5	2	2	307.198	No	2
Tor-IR	5	2	0	265.281	Yes	1
Tor-IR	5	2	0	447.313	No	1
Tor-IR	5	2	0	542.873	No	1
Tor-IR	5	2	0	168.939	No	1
Tor-IR	5	2	0	146.955	No	1
Tor-IR	5	2	0	380.285	No	1
Tor-IR	5	4	1	185.257	Yes	1
Tor-IR	5	4	1	408.523	No	1
Tor-IR	5	4	1	311.204	No	1
Tor-IR	5	4	1	204.603	No	1
Tor-IR	5	4	1	473.304	No	1
Tor-IR	5	4	1	344.718	No	1
Tor-IR	5	4	1	134.155	Yes	2
Tor-IR	5	4	1	438.031	No	2
Tor-IR	5	4	1	408.718	No	2
Tor-IR	5	4	1	491.771	No	2
Tor-IR	5	4	1	530.171	No	2
Tor-IR	5	4	1	626.61	No	2
Tor-IR	5	4	0	78.754	Yes	1
Tor-IR	5	4	0	688.264	No	1
Tor-IR	5	4	0	557.725	No	1
Tor-IR	5	4	0	629.736	No	1
Tor-IR	5	4	0	647.813	No	1
Tor-IR	5	4	0	633.84	No	1
Tor-IR	5	4	0	73.673	Yes	2
Tor-IR	5	4	0	487.374	No	2
Tor-IR	5	4	0	768.679	No	2
Tor-IR	5	4	0	624.558	No	2
Tor-IR	5	4	0	574.433	No	2
Tor-IR	5	4	0	533.59	No	2
