# Supplementary material for: Multiscale analysis reveals that diet-dependent midgut plasticity emerges from alterations in both stem cell niche coupling and enterocyte size
Source: eLife. 2021 Sep 23;10:e64125. doi: 10.7554/eLife.64125 (PMC8528489; doi:10.7554/eLife.64125)
Supplement: Figure 7—source data 2. [file elife-64125-fig7-data2.csv]

Cross	Female.Line	Repeat	Diet	Day	Group	C.G	Male.Line.ID	Male.Line	Gene	Region	GutNumber	Area
Myo X 1 P1(2020) R1	Myo	1	HStoHY	7	G	HY	Cs	Control	Control	4	1	818.365
Myo X 1 P1(2020) R1	Myo	1	HStoHY	7	G	HY	Cs	Control	Control	4	1	705.7
Myo X 1 P1(2020) R1	Myo	1	HStoHY	7	G	HY	Cs	Control	Control	4	1	434.707
Myo X 1 P1(2020) R1	Myo	1	HStoHY	7	G	HY	Cs	Control	Control	4	1	594.83
Myo X 1 P1(2020) R1	Myo	1	HStoHY	7	G	HY	Cs	Control	Control	4	1	358.733
Myo X 1 P1(2020) R1	Myo	1	HStoHY	7	G	HY	Cs	Control	Control	4	1	722.451
Myo X 1 P1(2020) R1	Myo	1	HStoHY	7	G	HY	Cs	Control	Control	4	1	591.042
Myo X 1 P1(2020) R1	Myo	1	HStoHY	7	G	HY	Cs	Control	Control	4	1	289.539
Myo X 1 P1(2020) R1	Myo	1	HStoHY	7	G	HY	Cs	Control	Control	4	1	599.815
Myo X 1 P1(2020) R1	Myo	1	HStoHY	7	G	HY	Cs	Control	Control	4	1	412.174
Myo X 1 P1(2020) R1	Myo	1	HStoHY	7	G	HY	Cs	Control	Control	4	1	590.443
Myo X 1 P1(2020) R1	Myo	1	HStoHY	7	G	HY	Cs	Control	Control	4	1	358.134
Myo X 1 P1(2020) R1	Myo	1	HStoHY	7	G	HY	Cs	Control	Control	4	1	283.756
Myo X 1 P1(2020) R1	Myo	1	HStoHY	7	G	HY	Cs	Control	Control	4	1	194.621
Myo X 1 P1(2020) R1	Myo	1	HStoHY	7	G	HY	Cs	Control	Control	4	1	202.797
Myo X 1 P1(2020) R1	Myo	1	HStoHY	7	G	HY	Cs	Control	Control	4	1	478.576
Myo X 1 P1(2020) R1	Myo	1	HStoHY	7	G	HY	Cs	Control	Control	4	1	250.455
Myo X 1 P1(2020) R1	Myo	1	HStoHY	7	G	HY	Cs	Control	Control	4	1	430.12
Myo X 1 P1(2020) R1	Myo	1	HStoHY	7	G	HY	Cs	Control	Control	4	1	240.086
Myo X 1 P1(2020) R1	Myo	1	HStoHY	7	G	HY	Cs	Control	Control	4	1	644.283
Myo X 1 P1(2020) R1	Myo	1	HStoHY	7	G	HY	Cs	Control	Control	4	1	494.728
Myo X 1 P1(2020) R1	Myo	1	HStoHY	7	G	HY	Cs	Control	Control	4	1	661.233
Myo X 1 P1(2020) R1	Myo	1	HStoHY	7	G	HY	Cs	Control	Control	4	1	589.446
Myo X 1 P1(2020) R1	Myo	1	HStoHY	7	G	HY	Cs	Control	Control	4	1	391.834
Myo X 1 P1(2020) R1	Myo	1	HStoHY	7	G	HY	Cs	Control	Control	4	1	289.14
Myo X 1 P1(2020) R1	Myo	1	HStoHY	7	G	HY	Cs	Control	Control	4	1	848.874
Myo X 1 P1(2020) R1	Myo	1	HStoHY	7	G	HY	Cs	Control	Control	4	1	234.702
Myo X 1 P1(2020) R1	Myo	1	HStoHY	7	G	HY	Cs	Control	Control	4	1	284.952
Myo X 1 P1(2020) R1	Myo	1	HStoHY	7	G	HY	Cs	Control	Control	4	1	238.291
Myo X 1 P1(2020) R1	Myo	1	HStoHY	7	G	HY	Cs	Control	Control	4	1	558.538
Myo X 1 P1(2020) R1	Myo	1	HStoHY	7	G	HY	Cs	Control	Control	4	2	367.307
Myo X 1 P1(2020) R1	Myo	1	HStoHY	7	G	HY	Cs	Control	Control	4	2	419.153
Myo X 1 P1(2020) R1	Myo	1	HStoHY	7	G	HY	Cs	Control	Control	4	2	348.364
Myo X 1 P1(2020) R1	Myo	1	HStoHY	7	G	HY	Cs	Control	Control	4	2	210.972
Myo X 1 P1(2020) R1	Myo	1	HStoHY	7	G	HY	Cs	Control	Control	4	2	405.793
Myo X 1 P1(2020) R1	Myo	1	HStoHY	7	G	HY	Cs	Control	Control	4	2	275.381
Myo X 1 P1(2020) R1	Myo	1	HStoHY	7	G	HY	Cs	Control	Control	4	2	202.797
Myo X 1 P1(2020) R1	Myo	1	HStoHY	7	G	HY	Cs	Control	Control	4	2	180.064
Myo X 1 P1(2020) R1	Myo	1	HStoHY	7	G	HY	Cs	Control	Control	4	2	202.797
Myo X 1 P1(2020) R1	Myo	1	HStoHY	7	G	HY	Cs	Control	Control	4	2	164.311
Myo X 1 P1(2020) R1	Myo	1	HStoHY	7	G	HY	Cs	Control	Control	4	2	305.092
Myo X 1 P1(2020) R1	Myo	1	HStoHY	7	G	HY	Cs	Control	Control	4	2	180.662
Myo X 1 P1(2020) R1	Myo	1	HStoHY	7	G	HY	Cs	Control	Control	4	2	362.721
Myo X 1 P1(2020) R1	Myo	1	HStoHY	7	G	HY	Cs	Control	Control	4	2	300.307
Myo X 1 P1(2020) R1	Myo	1	HStoHY	7	G	HY	Cs	Control	Control	4	2	216.356
Myo X 1 P1(2020) R1	Myo	1	HStoHY	7	G	HY	Cs	Control	Control	4	2	279.768
Myo X 1 P1(2020) R1	Myo	1	HStoHY	7	G	HY	Cs	Control	Control	4	2	231.91
Myo X 1 P1(2020) R1	Myo	1	HStoHY	7	G	HY	Cs	Control	Control	4	2	137.591
Myo X 1 P1(2020) R1	Myo	1	HStoHY	7	G	HY	Cs	Control	Control	4	2	233.705
Myo X 1 P1(2020) R1	Myo	1	HStoHY	7	G	HY	Cs	Control	Control	4	2	208.579
Myo X 1 P1(2020) R1	Myo	1	HStoHY	7	G	HY	Cs	Control	Control	4	2	276.178
Myo X 1 P1(2020) R1	Myo	1	HStoHY	7	G	HY	Cs	Control	Control	4	2	268.401
Myo X 1 P1(2020) R1	Myo	1	HStoHY	7	G	HY	Cs	Control	Control	4	2	303.696
Myo X 1 P1(2020) R1	Myo	1	HStoHY	7	G	HY	Cs	Control	Control	4	2	310.077
Myo X 1 P1(2020) R1	Myo	1	HStoHY	7	G	HY	Cs	Control	Control	4	2	267.803
Myo X 1 P1(2020) R1	Myo	1	HStoHY	7	G	HY	Cs	Control	Control	4	2	327.027
Myo X 1 P1(2020) R1	Myo	1	HStoHY	7	G	HY	Cs	Control	Control	4	2	288.143
Myo X 1 P1(2020) R1	Myo	1	HStoHY	7	G	HY	Cs	Control	Control	4	2	293.527
Myo X 1 P1(2020) R1	Myo	1	HStoHY	7	G	HY	Cs	Control	Control	4	2	347.765
Myo X 1 P1(2020) R1	Myo	1	HStoHY	7	G	HY	Cs	Control	Control	4	2	271.393
Myo X 1 P1(2020) R1	Myo	1	HStoHY	7	G	HY	Cs	Control	Control	4	3	775.892
Myo X 1 P1(2020) R1	Myo	1	HStoHY	7	G	HY	Cs	Control	Control	4	3	294.723
Myo X 1 P1(2020) R1	Myo	1	HStoHY	7	G	HY	Cs	Control	Control	4	3	532.416
Myo X 1 P1(2020) R1	Myo	1	HStoHY	7	G	HY	Cs	Control	Control	4	3	623.345
Myo X 1 P1(2020) R1	Myo	1	HStoHY	7	G	HY	Cs	Control	Control	4	3	707.495
Myo X 1 P1(2020) R1	Myo	1	HStoHY	7	G	HY	Cs	Control	Control	4	3	442.484
Myo X 1 P1(2020) R1	Myo	1	HStoHY	7	G	HY	Cs	Control	Control	4	3	311.074
Myo X 1 P1(2020) R1	Myo	1	HStoHY	7	G	HY	Cs	Control	Control	4	3	282.759
Myo X 1 P1(2020) R1	Myo	1	HStoHY	7	G	HY	Cs	Control	Control	4	3	789.651
Myo X 1 P1(2020) R1	Myo	1	HStoHY	7	G	HY	Cs	Control	Control	4	3	272.589
Myo X 1 P1(2020) R1	Myo	1	HStoHY	7	G	HY	Cs	Control	Control	4	3	512.076
Myo X 1 P1(2020) R1	Myo	1	HStoHY	7	G	HY	Cs	Control	Control	4	3	421.945
Myo X 1 P1(2020) R1	Myo	1	HStoHY	7	G	HY	Cs	Control	Control	4	3	280.366
Myo X 1 P1(2020) R1	Myo	1	HStoHY	7	G	HY	Cs	Control	Control	4	3	270.196
Myo X 1 P1(2020) R1	Myo	1	HStoHY	7	G	HY	Cs	Control	Control	4	3	237.095
Myo X 1 P1(2020) R1	Myo	1	HStoHY	7	G	HY	Cs	Control	Control	4	3	345.771
Myo X 1 P1(2020) R1	Myo	1	HStoHY	7	G	HY	Cs	Control	Control	4	3	437.897
Myo X 1 P1(2020) R1	Myo	1	HStoHY	7	G	HY	Cs	Control	Control	4	3	428.126
Myo X 1 P1(2020) R1	Myo	1	HStoHY	7	G	HY	Cs	Control	Control	4	3	289.339
Myo X 1 P1(2020) R1	Myo	1	HStoHY	7	G	HY	Cs	Control	Control	4	3	474.787
Myo X 1 P1(2020) R1	Myo	1	HStoHY	7	G	HY	Cs	Control	Control	4	3	482.764
Myo X 1 P1(2020) R1	Myo	1	HStoHY	7	G	HY	Cs	Control	Control	4	3	348.762
Myo X 1 P1(2020) R1	Myo	1	HStoHY	7	G	HY	Cs	Control	Control	4	3	411.575
Myo X 1 P1(2020) R1	Myo	1	HStoHY	7	G	HY	Cs	Control	Control	4	3	433.311
Myo X 1 P1(2020) R1	Myo	1	HStoHY	7	G	HY	Cs	Control	Control	4	3	448.466
Myo X 1 P1(2020) R1	Myo	1	HStoHY	7	G	HY	Cs	Control	Control	4	3	670.804
Myo X 1 P1(2020) R1	Myo	1	HStoHY	7	G	HY	Cs	Control	Control	4	3	303.696
Myo X 1 P1(2020) R1	Myo	1	HStoHY	7	G	HY	Cs	Control	Control	4	3	336.599
Myo X 1 P1(2020) R1	Myo	1	HStoHY	7	G	HY	Cs	Control	Control	4	3	274.384
Myo X 1 P1(2020) R1	Myo	1	HStoHY	7	G	HY	Cs	Control	Control	4	3	345.572
Myo X 1 P1(2020) R1	Myo	1	HStoHY	7	G	HY	Cs	Control	Control	4	4	361.126
Myo X 1 P1(2020) R1	Myo	1	HStoHY	7	G	HY	Cs	Control	Control	4	4	175.279
Myo X 1 P1(2020) R1	Myo	1	HStoHY	7	G	HY	Cs	Control	Control	4	4	212.368
Myo X 1 P1(2020) R1	Myo	1	HStoHY	7	G	HY	Cs	Control	Control	4	4	341.983
Myo X 1 P1(2020) R1	Myo	1	HStoHY	7	G	HY	Cs	Control	Control	4	4	342.78
Myo X 1 P1(2020) R1	Myo	1	HStoHY	7	G	HY	Cs	Control	Control	4	4	305.691
Myo X 1 P1(2020) R1	Myo	1	HStoHY	7	G	HY	Cs	Control	Control	4	4	183.055
Myo X 1 P1(2020) R1	Myo	1	HStoHY	7	G	HY	Cs	Control	Control	4	4	364.515
Myo X 1 P1(2020) R1	Myo	1	HStoHY	7	G	HY	Cs	Control	Control	4	4	423.34
Myo X 1 P1(2020) R1	Myo	1	HStoHY	7	G	HY	Cs	Control	Control	4	4	249.657
Myo X 1 P1(2020) R1	Myo	1	HStoHY	7	G	HY	Cs	Control	Control	4	4	366.31
Myo X 1 P1(2020) R1	Myo	1	HStoHY	7	G	HY	Cs	Control	Control	4	4	180.264
Myo X 1 P1(2020) R1	Myo	1	HStoHY	7	G	HY	Cs	Control	Control	4	4	170.293
Myo X 1 P1(2020) R1	Myo	1	HStoHY	7	G	HY	Cs	Control	Control	4	4	193.823
Myo X 1 P1(2020) R1	Myo	1	HStoHY	7	G	HY	Cs	Control	Control	4	4	258.232
Myo X 1 P1(2020) R1	Myo	1	HStoHY	7	G	HY	Cs	Control	Control	4	4	263.017
Myo X 1 P1(2020) R1	Myo	1	HStoHY	7	G	HY	Cs	Control	Control	4	4	290.536
Myo X 1 P1(2020) R1	Myo	1	HStoHY	7	G	HY	Cs	Control	Control	4	4	159.924
Myo X 1 P1(2020) R1	Myo	1	HStoHY	7	G	HY	Cs	Control	Control	4	4	232.708
Myo X 1 P1(2020) R1	Myo	1	HStoHY	7	G	HY	Cs	Control	Control	4	4	181.46
Myo X 1 P1(2020) R1	Myo	1	HStoHY	7	G	HY	Cs	Control	Control	4	4	298.312
Myo X 1 P1(2020) R1	Myo	1	HStoHY	7	G	HY	Cs	Control	Control	4	4	444.079
Myo X 1 P1(2020) R1	Myo	1	HStoHY	7	G	HY	Cs	Control	Control	4	4	341.783
Myo X 1 P1(2020) R1	Myo	1	HStoHY	7	G	HY	Cs	Control	Control	4	4	444.079
Myo X 1 P1(2020) R1	Myo	1	HStoHY	7	G	HY	Cs	Control	Control	4	4	238.49
Myo X 1 P1(2020) R1	Myo	1	HStoHY	7	G	HY	Cs	Control	Control	4	4	288.143
Myo X 1 P1(2020) R1	Myo	1	HStoHY	7	G	HY	Cs	Control	Control	4	4	313.268
Myo X 1 P1(2020) R1	Myo	1	HStoHY	7	G	HY	Cs	Control	Control	4	4	134.6
Myo X 1 P1(2020) R1	Myo	1	HStoHY	7	G	HY	Cs	Control	Control	4	4	226.327
Myo X 1 P1(2020) R1	Myo	1	HStoHY	7	G	HY	Cs	Control	Control	4	4	229.517
Myo X 1 P1(2020) R1	Myo	1	HStoHY	7	G	HY	Cs	Control	Control	4	5	708.492
Myo X 1 P1(2020) R1	Myo	1	HStoHY	7	G	HY	Cs	Control	Control	4	5	364.117
Myo X 1 P1(2020) R1	Myo	1	HStoHY	7	G	HY	Cs	Control	Control	4	5	257.633
Myo X 1 P1(2020) R1	Myo	1	HStoHY	7	G	HY	Cs	Control	Control	4	5	682.769
Myo X 1 P1(2020) R1	Myo	1	HStoHY	7	G	HY	Cs	Control	Control	4	5	711.084
Myo X 1 P1(2020) R1	Myo	1	HStoHY	7	G	HY	Cs	Control	Control	4	5	511.877
Myo X 1 P1(2020) R1	Myo	1	HStoHY	7	G	HY	Cs	Control	Control	4	5	644.483
Myo X 1 P1(2020) R1	Myo	1	HStoHY	7	G	HY	Cs	Control	Control	4	5	545.178
Myo X 1 P1(2020) R1	Myo	1	HStoHY	7	G	HY	Cs	Control	Control	4	5	456.641
Myo X 1 P1(2020) R1	Myo	1	HStoHY	7	G	HY	Cs	Control	Control	4	5	501.508
Myo X 1 P1(2020) R1	Myo	1	HStoHY	7	G	HY	Cs	Control	Control	4	5	319.848
Myo X 1 P1(2020) R1	Myo	1	HStoHY	7	G	HY	Cs	Control	Control	4	5	643.884
Myo X 1 P1(2020) R1	Myo	1	HStoHY	7	G	HY	Cs	Control	Control	4	5	497.52
Myo X 1 P1(2020) R1	Myo	1	HStoHY	7	G	HY	Cs	Control	Control	4	5	362.322
Myo X 1 P1(2020) R1	Myo	1	HStoHY	7	G	HY	Cs	Control	Control	4	5	487.948
Myo X 1 P1(2020) R1	Myo	1	HStoHY	7	G	HY	Cs	Control	Control	4	5	606.396
Myo X 1 P1(2020) R1	Myo	1	HStoHY	7	G	HY	Cs	Control	Control	4	5	455.844
Myo X 1 P1(2020) R1	Myo	1	HStoHY	7	G	HY	Cs	Control	Control	4	5	345.372
Myo X 1 P1(2020) R1	Myo	1	HStoHY	7	G	HY	Cs	Control	Control	4	5	390.04
Myo X 1 P1(2020) R1	Myo	1	HStoHY	7	G	HY	Cs	Control	Control	4	5	494.927
Myo X 1 P1(2020) R1	Myo	1	HStoHY	7	G	HY	Cs	Control	Control	4	5	603.804
Myo X 1 P1(2020) R1	Myo	1	HStoHY	7	G	HY	Cs	Control	Control	4	5	252.848
Myo X 1 P1(2020) R1	Myo	1	HStoHY	7	G	HY	Cs	Control	Control	4	5	217.553
Myo X 1 P1(2020) R1	Myo	1	HStoHY	7	G	HY	Cs	Control	Control	4	5	539.595
Myo X 1 P1(2020) R1	Myo	1	HStoHY	7	G	HY	Cs	Control	Control	4	5	195.618
Myo X 1 P1(2020) R1	Myo	1	HStoHY	7	G	HY	Cs	Control	Control	4	5	170.293
Myo X 1 P1(2020) R1	Myo	1	HStoHY	7	G	HY	Cs	Control	Control	4	5	199.407
Myo X 1 P1(2020) R1	Myo	1	HStoHY	7	G	HY	Cs	Control	Control	4	5	208.38
Myo X 1 P1(2020) R1	Myo	1	HStoHY	7	G	HY	Cs	Control	Control	4	5	487.749
Myo X 1 P1(2020) R1	Myo	1	HStoHY	7	G	HY	Cs	Control	Control	4	5	922.655
Myo X 1 P1(2020) R1	Myo	1	HStoHY	7	G	HY	Cs	Control	Control	4	6	165.906
Myo X 1 P1(2020) R1	Myo	1	HStoHY	7	G	HY	Cs	Control	Control	4	6	171.689
Myo X 1 P1(2020) R1	Myo	1	HStoHY	7	G	HY	Cs	Control	Control	4	6	130.213
Myo X 1 P1(2020) R1	Myo	1	HStoHY	7	G	HY	Cs	Control	Control	4	6	371.495
Myo X 1 P1(2020) R1	Myo	1	HStoHY	7	G	HY	Cs	Control	Control	4	6	154.54
Myo X 1 P1(2020) R1	Myo	1	HStoHY	7	G	HY	Cs	Control	Control	4	6	202.398
Myo X 1 P1(2020) R1	Myo	1	HStoHY	7	G	HY	Cs	Control	Control	4	6	159.525
Myo X 1 P1(2020) R1	Myo	1	HStoHY	7	G	HY	Cs	Control	Control	4	6	129.415
Myo X 1 P1(2020) R1	Myo	1	HStoHY	7	G	HY	Cs	Control	Control	4	6	209.975
Myo X 1 P1(2020) R1	Myo	1	HStoHY	7	G	HY	Cs	Control	Control	4	6	166.704
Myo X 1 P1(2020) R1	Myo	1	HStoHY	7	G	HY	Cs	Control	Control	4	6	158.528
Myo X 1 P1(2020) R1	Myo	1	HStoHY	7	G	HY	Cs	Control	Control	4	6	193.823
Myo X 1 P1(2020) R1	Myo	1	HStoHY	7	G	HY	Cs	Control	Control	4	6	111.468
Myo X 1 P1(2020) R1	Myo	1	HStoHY	7	G	HY	Cs	Control	Control	4	6	209.776
Myo X 1 P1(2020) R1	Myo	1	HStoHY	7	G	HY	Cs	Control	Control	4	6	161.719
Myo X 1 P1(2020) R1	Myo	1	HStoHY	7	G	HY	Cs	Control	Control	4	6	208.978
Myo X 1 P1(2020) R1	Myo	1	HStoHY	7	G	HY	Cs	Control	Control	4	6	215.16
Myo X 1 P1(2020) R1	Myo	1	HStoHY	7	G	HY	Cs	Control	Control	4	6	194.222
Myo X 1 P1(2020) R1	Myo	1	HStoHY	7	G	HY	Cs	Control	Control	4	6	173.683
Myo X 1 P1(2020) R1	Myo	1	HStoHY	7	G	HY	Cs	Control	Control	4	6	236.895
Myo X 1 P1(2020) R1	Myo	1	HStoHY	7	G	HY	Cs	Control	Control	4	6	194.023
Myo X 1 P1(2020) R1	Myo	1	HStoHY	7	G	HY	Cs	Control	Control	4	6	218.35
Myo X 1 P1(2020) R1	Myo	1	HStoHY	7	G	HY	Cs	Control	Control	4	6	185.648
Myo X 1 P1(2020) R1	Myo	1	HStoHY	7	G	HY	Cs	Control	Control	4	6	254.842
Myo X 1 P1(2020) R1	Myo	1	HStoHY	7	G	HY	Cs	Control	Control	4	6	229.916
Myo X 1 P1(2020) R1	Myo	1	HStoHY	7	G	HY	Cs	Control	Control	4	6	272.19
Myo X 1 P1(2020) R1	Myo	1	HStoHY	7	G	HY	Cs	Control	Control	4	6	241.88
Myo X 1 P1(2020) R1	Myo	1	HStoHY	7	G	HY	Cs	Control	Control	4	6	215.957
Myo X 1 P1(2020) R1	Myo	1	HStoHY	7	G	HY	Cs	Control	Control	4	6	201.002
Myo X 1 P1(2020) R1	Myo	1	HStoHY	7	G	HY	Cs	Control	Control	4	6	246.866
Myo X 1 P1(2020) R1	Myo	1	HStoHY	7	G	HY	Cs	Control	Control	4	7	529.026
Myo X 1 P1(2020) R1	Myo	1	HStoHY	7	G	HY	Cs	Control	Control	4	7	436.9
Myo X 1 P1(2020) R1	Myo	1	HStoHY	7	G	HY	Cs	Control	Control	4	7	254.244
Myo X 1 P1(2020) R1	Myo	1	HStoHY	7	G	HY	Cs	Control	Control	4	7	317.057
Myo X 1 P1(2020) R1	Myo	1	HStoHY	7	G	HY	Cs	Control	Control	4	7	434.507
Myo X 1 P1(2020) R1	Myo	1	HStoHY	7	G	HY	Cs	Control	Control	4	7	428.126
Myo X 1 P1(2020) R1	Myo	1	HStoHY	7	G	HY	Cs	Control	Control	4	7	420.748
Myo X 1 P1(2020) R1	Myo	1	HStoHY	7	G	HY	Cs	Control	Control	4	7	387.447
Myo X 1 P1(2020) R1	Myo	1	HStoHY	7	G	HY	Cs	Control	Control	4	7	365.513
Myo X 1 P1(2020) R1	Myo	1	HStoHY	7	G	HY	Cs	Control	Control	4	7	377.676
Myo X 1 P1(2020) R1	Myo	1	HStoHY	7	G	HY	Cs	Control	Control	4	7	285.949
Myo X 1 P1(2020) R1	Myo	1	HStoHY	7	G	HY	Cs	Control	Control	4	7	325.232
Myo X 1 P1(2020) R1	Myo	1	HStoHY	7	G	HY	Cs	Control	Control	4	7	348.563
Myo X 1 P1(2020) R1	Myo	1	HStoHY	7	G	HY	Cs	Control	Control	4	7	310.676
Myo X 1 P1(2020) R1	Myo	1	HStoHY	7	G	HY	Cs	Control	Control	4	7	300.307
Myo X 1 P1(2020) R1	Myo	1	HStoHY	7	G	HY	Cs	Control	Control	4	7	311.274
Myo X 1 P1(2020) R1	Myo	1	HStoHY	7	G	HY	Cs	Control	Control	4	7	351.155
Myo X 1 P1(2020) R1	Myo	1	HStoHY	7	G	HY	Cs	Control	Control	4	7	204.192
Myo X 1 P1(2020) R1	Myo	1	HStoHY	7	G	HY	Cs	Control	Control	4	7	477.978
Myo X 1 P1(2020) R1	Myo	1	HStoHY	7	G	HY	Cs	Control	Control	4	7	373.289
Myo X 1 P1(2020) R1	Myo	1	HStoHY	7	G	HY	Cs	Control	Control	4	7	455.844
Myo X 1 P1(2020) R1	Myo	1	HStoHY	7	G	HY	Cs	Control	Control	4	7	255.44
Myo X 1 P1(2020) R1	Myo	1	HStoHY	7	G	HY	Cs	Control	Control	4	7	208.38
Myo X 1 P1(2020) R1	Myo	1	HStoHY	7	G	HY	Cs	Control	Control	4	7	192.228
Myo X 1 P1(2020) R1	Myo	1	HStoHY	7	G	HY	Cs	Control	Control	4	7	249.059
Myo X 1 P1(2020) R1	Myo	1	HStoHY	7	G	HY	Cs	Control	Control	4	7	310.476
Myo X 1 P1(2020) R1	Myo	1	HStoHY	7	G	HY	Cs	Control	Control	4	7	277.774
Myo X 1 P1(2020) R1	Myo	1	HStoHY	7	G	HY	Cs	Control	Control	4	7	193.026
Myo X 1 P1(2020) R1	Myo	1	HStoHY	7	G	HY	Cs	Control	Control	4	7	152.546
Myo X 1 P1(2020) R1	Myo	1	HStoHY	7	G	HY	Cs	Control	Control	4	7	284.553
Myo X 3 P1(2020) R1	Myo	1	HStoHY	7	G	HY	34639	Tor-IR	Tor	4	1	170.493
Myo X 3 P1(2020) R1	Myo	1	HStoHY	7	G	HY	34639	Tor-IR	Tor	4	1	245.868
Myo X 3 P1(2020) R1	Myo	1	HStoHY	7	G	HY	34639	Tor-IR	Tor	4	1	198.609
Myo X 3 P1(2020) R1	Myo	1	HStoHY	7	G	HY	34639	Tor-IR	Tor	4	1	190.832
Myo X 3 P1(2020) R1	Myo	1	HStoHY	7	G	HY	34639	Tor-IR	Tor	4	1	106.284
Myo X 3 P1(2020) R1	Myo	1	HStoHY	7	G	HY	34639	Tor-IR	Tor	4	1	143.972
Myo X 3 P1(2020) R1	Myo	1	HStoHY	7	G	HY	34639	Tor-IR	Tor	4	1	109.873
Myo X 3 P1(2020) R1	Myo	1	HStoHY	7	G	HY	34639	Tor-IR	Tor	4	1	111.867
Myo X 3 P1(2020) R1	Myo	1	HStoHY	7	G	HY	34639	Tor-IR	Tor	4	1	131.409
Myo X 3 P1(2020) R1	Myo	1	HStoHY	7	G	HY	34639	Tor-IR	Tor	4	1	150.153
Myo X 3 P1(2020) R1	Myo	1	HStoHY	7	G	HY	34639	Tor-IR	Tor	4	1	133.004
Myo X 3 P1(2020) R1	Myo	1	HStoHY	7	G	HY	34639	Tor-IR	Tor	4	1	127.022
Myo X 3 P1(2020) R1	Myo	1	HStoHY	7	G	HY	34639	Tor-IR	Tor	4	1	83.95
Myo X 3 P1(2020) R1	Myo	1	HStoHY	7	G	HY	34639	Tor-IR	Tor	4	1	117.052
Myo X 3 P1(2020) R1	Myo	1	HStoHY	7	G	HY	34639	Tor-IR	Tor	4	1	106.084
Myo X 3 P1(2020) R1	Myo	1	HStoHY	7	G	HY	34639	Tor-IR	Tor	4	1	130.611
Myo X 3 P1(2020) R1	Myo	1	HStoHY	7	G	HY	34639	Tor-IR	Tor	4	1	100.501
Myo X 3 P1(2020) R1	Myo	1	HStoHY	7	G	HY	34639	Tor-IR	Tor	4	1	62.015
Myo X 3 P1(2020) R1	Myo	1	HStoHY	7	G	HY	34639	Tor-IR	Tor	4	1	190.832
Myo X 3 P1(2020) R1	Myo	1	HStoHY	7	G	HY	34639	Tor-IR	Tor	4	1	76.373
Myo X 3 P1(2020) R1	Myo	1	HStoHY	7	G	HY	34639	Tor-IR	Tor	4	1	68.197
Myo X 3 P1(2020) R1	Myo	1	HStoHY	7	G	HY	34639	Tor-IR	Tor	4	1	253.047
Myo X 3 P1(2020) R1	Myo	1	HStoHY	7	G	HY	34639	Tor-IR	Tor	4	1	132.207
Myo X 3 P1(2020) R1	Myo	1	HStoHY	7	G	HY	34639	Tor-IR	Tor	4	1	110.073
Myo X 3 P1(2020) R1	Myo	1	HStoHY	7	G	HY	34639	Tor-IR	Tor	4	1	103.691
Myo X 3 P1(2020) R1	Myo	1	HStoHY	7	G	HY	34639	Tor-IR	Tor	4	1	202.597
Myo X 3 P1(2020) R1	Myo	1	HStoHY	7	G	HY	34639	Tor-IR	Tor	4	1	122.037
Myo X 3 P1(2020) R1	Myo	1	HStoHY	7	G	HY	34639	Tor-IR	Tor	4	1	131.608
Myo X 3 P1(2020) R1	Myo	1	HStoHY	7	G	HY	34639	Tor-IR	Tor	4	1	148.359
Myo X 3 P1(2020) R1	Myo	1	HStoHY	7	G	HY	34639	Tor-IR	Tor	4	1	122.236
Myo X 3 P1(2020) R1	Myo	1	HStoHY	7	G	HY	34639	Tor-IR	Tor	4	2	528.428
Myo X 3 P1(2020) R1	Myo	1	HStoHY	7	G	HY	34639	Tor-IR	Tor	4	2	108.078
Myo X 3 P1(2020) R1	Myo	1	HStoHY	7	G	HY	34639	Tor-IR	Tor	4	2	152.746
Myo X 3 P1(2020) R1	Myo	1	HStoHY	7	G	HY	34639	Tor-IR	Tor	4	2	90.132
Myo X 3 P1(2020) R1	Myo	1	HStoHY	7	G	HY	34639	Tor-IR	Tor	4	2	94.918
Myo X 3 P1(2020) R1	Myo	1	HStoHY	7	G	HY	34639	Tor-IR	Tor	4	2	102.894
Myo X 3 P1(2020) R1	Myo	1	HStoHY	7	G	HY	34639	Tor-IR	Tor	4	2	240.883
Myo X 3 P1(2020) R1	Myo	1	HStoHY	7	G	HY	34639	Tor-IR	Tor	4	2	165.707
Myo X 3 P1(2020) R1	Myo	1	HStoHY	7	G	HY	34639	Tor-IR	Tor	4	2	281.363
Myo X 3 P1(2020) R1	Myo	1	HStoHY	7	G	HY	34639	Tor-IR	Tor	4	2	147.362
Myo X 3 P1(2020) R1	Myo	1	HStoHY	7	G	HY	34639	Tor-IR	Tor	4	2	514.071
Myo X 3 P1(2020) R1	Myo	1	HStoHY	7	G	HY	34639	Tor-IR	Tor	4	2	459.433
Myo X 3 P1(2020) R1	Myo	1	HStoHY	7	G	HY	34639	Tor-IR	Tor	4	2	144.57
Myo X 3 P1(2020) R1	Myo	1	HStoHY	7	G	HY	34639	Tor-IR	Tor	4	2	154.341
Myo X 3 P1(2020) R1	Myo	1	HStoHY	7	G	HY	34639	Tor-IR	Tor	4	2	146.963
Myo X 3 P1(2020) R1	Myo	1	HStoHY	7	G	HY	34639	Tor-IR	Tor	4	2	75.974
Myo X 3 P1(2020) R1	Myo	1	HStoHY	7	G	HY	34639	Tor-IR	Tor	4	2	156.534
Myo X 3 P1(2020) R1	Myo	1	HStoHY	7	G	HY	34639	Tor-IR	Tor	4	2	349.959
Myo X 3 P1(2020) R1	Myo	1	HStoHY	7	G	HY	34639	Tor-IR	Tor	4	2	138.189
Myo X 3 P1(2020) R1	Myo	1	HStoHY	7	G	HY	34639	Tor-IR	Tor	4	2	139.984
Myo X 3 P1(2020) R1	Myo	1	HStoHY	7	G	HY	34639	Tor-IR	Tor	4	2	432.513
Myo X 3 P1(2020) R1	Myo	1	HStoHY	7	G	HY	34639	Tor-IR	Tor	4	2	222.737
Myo X 3 P1(2020) R1	Myo	1	HStoHY	7	G	HY	34639	Tor-IR	Tor	4	2	110.87
Myo X 3 P1(2020) R1	Myo	1	HStoHY	7	G	HY	34639	Tor-IR	Tor	4	2	100.102
Myo X 3 P1(2020) R1	Myo	1	HStoHY	7	G	HY	34639	Tor-IR	Tor	4	2	127.62
Myo X 3 P1(2020) R1	Myo	1	HStoHY	7	G	HY	34639	Tor-IR	Tor	4	2	116.055
Myo X 3 P1(2020) R1	Myo	1	HStoHY	7	G	HY	34639	Tor-IR	Tor	4	2	187.044
Myo X 3 P1(2020) R1	Myo	1	HStoHY	7	G	HY	34639	Tor-IR	Tor	4	2	326.429
Myo X 3 P1(2020) R1	Myo	1	HStoHY	7	G	HY	34639	Tor-IR	Tor	4	2	456.043
Myo X 3 P1(2020) R1	Myo	1	HStoHY	7	G	HY	34639	Tor-IR	Tor	4	2	156.933
Myo X 3 P1(2020) R1	Myo	1	HStoHY	7	G	HY	34639	Tor-IR	Tor	4	3	75.974
Myo X 3 P1(2020) R1	Myo	1	HStoHY	7	G	HY	34639	Tor-IR	Tor	4	3	97.909
Myo X 3 P1(2020) R1	Myo	1	HStoHY	7	G	HY	34639	Tor-IR	Tor	4	3	101.697
Myo X 3 P1(2020) R1	Myo	1	HStoHY	7	G	HY	34639	Tor-IR	Tor	4	3	93.123
Myo X 3 P1(2020) R1	Myo	1	HStoHY	7	G	HY	34639	Tor-IR	Tor	4	3	80.76
Myo X 3 P1(2020) R1	Myo	1	HStoHY	7	G	HY	34639	Tor-IR	Tor	4	3	92.126
Myo X 3 P1(2020) R1	Myo	1	HStoHY	7	G	HY	34639	Tor-IR	Tor	4	3	79.364
Myo X 3 P1(2020) R1	Myo	1	HStoHY	7	G	HY	34639	Tor-IR	Tor	4	3	79.563
Myo X 3 P1(2020) R1	Myo	1	HStoHY	7	G	HY	34639	Tor-IR	Tor	4	3	54.239
Myo X 3 P1(2020) R1	Myo	1	HStoHY	7	G	HY	34639	Tor-IR	Tor	4	3	99.105
Myo X 3 P1(2020) R1	Myo	1	HStoHY	7	G	HY	34639	Tor-IR	Tor	4	3	87.739
Myo X 3 P1(2020) R1	Myo	1	HStoHY	7	G	HY	34639	Tor-IR	Tor	4	3	79.962
Myo X 3 P1(2020) R1	Myo	1	HStoHY	7	G	HY	34639	Tor-IR	Tor	4	3	70.789
Myo X 3 P1(2020) R1	Myo	1	HStoHY	7	G	HY	34639	Tor-IR	Tor	4	3	107.68
Myo X 3 P1(2020) R1	Myo	1	HStoHY	7	G	HY	34639	Tor-IR	Tor	4	3	97.909
Myo X 3 P1(2020) R1	Myo	1	HStoHY	7	G	HY	34639	Tor-IR	Tor	4	3	113.064
Myo X 3 P1(2020) R1	Myo	1	HStoHY	7	G	HY	34639	Tor-IR	Tor	4	3	106.483
Myo X 3 P1(2020) R1	Myo	1	HStoHY	7	G	HY	34639	Tor-IR	Tor	4	3	54.438
Myo X 3 P1(2020) R1	Myo	1	HStoHY	7	G	HY	34639	Tor-IR	Tor	4	3	53.64
Myo X 3 P1(2020) R1	Myo	1	HStoHY	7	G	HY	34639	Tor-IR	Tor	4	3	91.727
Myo X 3 P1(2020) R1	Myo	1	HStoHY	7	G	HY	34639	Tor-IR	Tor	4	3	73.78
Myo X 3 P1(2020) R1	Myo	1	HStoHY	7	G	HY	34639	Tor-IR	Tor	4	3	85.944
Myo X 3 P1(2020) R1	Myo	1	HStoHY	7	G	HY	34639	Tor-IR	Tor	4	3	89.733
Myo X 3 P1(2020) R1	Myo	1	HStoHY	7	G	HY	34639	Tor-IR	Tor	4	3	170.094
Myo X 3 P1(2020) R1	Myo	1	HStoHY	7	G	HY	34639	Tor-IR	Tor	4	3	95.516
Myo X 3 P1(2020) R1	Myo	1	HStoHY	7	G	HY	34639	Tor-IR	Tor	4	3	111.867
Myo X 3 P1(2020) R1	Myo	1	HStoHY	7	G	HY	34639	Tor-IR	Tor	4	3	112.067
Myo X 3 P1(2020) R1	Myo	1	HStoHY	7	G	HY	34639	Tor-IR	Tor	4	3	124.629
Myo X 3 P1(2020) R1	Myo	1	HStoHY	7	G	HY	34639	Tor-IR	Tor	4	3	97.31
Myo X 3 P1(2020) R1	Myo	1	HStoHY	7	G	HY	34639	Tor-IR	Tor	4	3	62.614
Myo X 3 P1(2020) R1	Myo	1	HStoHY	7	G	HY	34639	Tor-IR	Tor	4	4	109.474
Myo X 3 P1(2020) R1	Myo	1	HStoHY	7	G	HY	34639	Tor-IR	Tor	4	4	96.912
Myo X 3 P1(2020) R1	Myo	1	HStoHY	7	G	HY	34639	Tor-IR	Tor	4	4	111.468
Myo X 3 P1(2020) R1	Myo	1	HStoHY	7	G	HY	34639	Tor-IR	Tor	4	4	112.067
Myo X 3 P1(2020) R1	Myo	1	HStoHY	7	G	HY	34639	Tor-IR	Tor	4	4	267.604
Myo X 3 P1(2020) R1	Myo	1	HStoHY	7	G	HY	34639	Tor-IR	Tor	4	4	220.344
Myo X 3 P1(2020) R1	Myo	1	HStoHY	7	G	HY	34639	Tor-IR	Tor	4	4	327.027
Myo X 3 P1(2020) R1	Myo	1	HStoHY	7	G	HY	34639	Tor-IR	Tor	4	4	93.921
Myo X 3 P1(2020) R1	Myo	1	HStoHY	7	G	HY	34639	Tor-IR	Tor	4	4	86.144
Myo X 3 P1(2020) R1	Myo	1	HStoHY	7	G	HY	34639	Tor-IR	Tor	4	4	134.201
Myo X 3 P1(2020) R1	Myo	1	HStoHY	7	G	HY	34639	Tor-IR	Tor	4	4	178.868
Myo X 3 P1(2020) R1	Myo	1	HStoHY	7	G	HY	34639	Tor-IR	Tor	4	4	244.074
Myo X 3 P1(2020) R1	Myo	1	HStoHY	7	G	HY	34639	Tor-IR	Tor	4	4	192.627
Myo X 3 P1(2020) R1	Myo	1	HStoHY	7	G	HY	34639	Tor-IR	Tor	4	4	97.51
Myo X 3 P1(2020) R1	Myo	1	HStoHY	7	G	HY	34639	Tor-IR	Tor	4	4	167.302
Myo X 3 P1(2020) R1	Myo	1	HStoHY	7	G	HY	34639	Tor-IR	Tor	4	4	157.531
Myo X 3 P1(2020) R1	Myo	1	HStoHY	7	G	HY	34639	Tor-IR	Tor	4	4	239.288
Myo X 3 P1(2020) R1	Myo	1	HStoHY	7	G	HY	34639	Tor-IR	Tor	4	4	93.921
Myo X 3 P1(2020) R1	Myo	1	HStoHY	7	G	HY	34639	Tor-IR	Tor	4	4	476.383
Myo X 3 P1(2020) R1	Myo	1	HStoHY	7	G	HY	34639	Tor-IR	Tor	4	4	117.849
Myo X 3 P1(2020) R1	Myo	1	HStoHY	7	G	HY	34639	Tor-IR	Tor	4	4	106.882
Myo X 3 P1(2020) R1	Myo	1	HStoHY	7	G	HY	34639	Tor-IR	Tor	4	4	115.855
Myo X 3 P1(2020) R1	Myo	1	HStoHY	7	G	HY	34639	Tor-IR	Tor	4	4	80.162
Myo X 3 P1(2020) R1	Myo	1	HStoHY	7	G	HY	34639	Tor-IR	Tor	4	4	111.867
Myo X 3 P1(2020) R1	Myo	1	HStoHY	7	G	HY	34639	Tor-IR	Tor	4	4	208.181
Myo X 3 P1(2020) R1	Myo	1	HStoHY	7	G	HY	34639	Tor-IR	Tor	4	4	180.662
Myo X 3 P1(2020) R1	Myo	1	HStoHY	7	G	HY	34639	Tor-IR	Tor	4	4	240.086
Myo X 3 P1(2020) R1	Myo	1	HStoHY	7	G	HY	34639	Tor-IR	Tor	4	4	139.984
Myo X 3 P1(2020) R1	Myo	1	HStoHY	7	G	HY	34639	Tor-IR	Tor	4	4	215.16
Myo X 3 P1(2020) R1	Myo	1	HStoHY	7	G	HY	34639	Tor-IR	Tor	4	4	123.433
Myo X 3 P1(2020) R1	Myo	1	HStoHY	7	G	HY	34639	Tor-IR	Tor	4	5	67.2
Myo X 3 P1(2020) R1	Myo	1	HStoHY	7	G	HY	34639	Tor-IR	Tor	4	5	84.548
Myo X 3 P1(2020) R1	Myo	1	HStoHY	7	G	HY	34639	Tor-IR	Tor	4	5	268.601
Myo X 3 P1(2020) R1	Myo	1	HStoHY	7	G	HY	34639	Tor-IR	Tor	4	5	96.912
Myo X 3 P1(2020) R1	Myo	1	HStoHY	7	G	HY	34639	Tor-IR	Tor	4	5	90.929
Myo X 3 P1(2020) R1	Myo	1	HStoHY	7	G	HY	34639	Tor-IR	Tor	4	5	102.296
Myo X 3 P1(2020) R1	Myo	1	HStoHY	7	G	HY	34639	Tor-IR	Tor	4	5	142.775
Myo X 3 P1(2020) R1	Myo	1	HStoHY	7	G	HY	34639	Tor-IR	Tor	4	5	72.783
Myo X 3 P1(2020) R1	Myo	1	HStoHY	7	G	HY	34639	Tor-IR	Tor	4	5	64.209
Myo X 3 P1(2020) R1	Myo	1	HStoHY	7	G	HY	34639	Tor-IR	Tor	4	5	117.65
Myo X 3 P1(2020) R1	Myo	1	HStoHY	7	G	HY	34639	Tor-IR	Tor	4	5	142.576
Myo X 3 P1(2020) R1	Myo	1	HStoHY	7	G	HY	34639	Tor-IR	Tor	4	5	137.79
Myo X 3 P1(2020) R1	Myo	1	HStoHY	7	G	HY	34639	Tor-IR	Tor	4	5	137.79
Myo X 3 P1(2020) R1	Myo	1	HStoHY	7	G	HY	34639	Tor-IR	Tor	4	5	111.269
Myo X 3 P1(2020) R1	Myo	1	HStoHY	7	G	HY	34639	Tor-IR	Tor	4	5	150.353
Myo X 3 P1(2020) R1	Myo	1	HStoHY	7	G	HY	34639	Tor-IR	Tor	4	5	109.075
Myo X 3 P1(2020) R1	Myo	1	HStoHY	7	G	HY	34639	Tor-IR	Tor	4	5	105.686
Myo X 3 P1(2020) R1	Myo	1	HStoHY	7	G	HY	34639	Tor-IR	Tor	4	5	146.564
Myo X 3 P1(2020) R1	Myo	1	HStoHY	7	G	HY	34639	Tor-IR	Tor	4	5	94.12
Myo X 3 P1(2020) R1	Myo	1	HStoHY	7	G	HY	34639	Tor-IR	Tor	4	5	63.411
Myo X 3 P1(2020) R1	Myo	1	HStoHY	7	G	HY	34639	Tor-IR	Tor	4	5	104.888
Myo X 3 P1(2020) R1	Myo	1	HStoHY	7	G	HY	34639	Tor-IR	Tor	4	5	120.442
Myo X 3 P1(2020) R1	Myo	1	HStoHY	7	G	HY	34639	Tor-IR	Tor	4	5	95.915
Myo X 3 P1(2020) R1	Myo	1	HStoHY	7	G	HY	34639	Tor-IR	Tor	4	5	131.808
Myo X 3 P1(2020) R1	Myo	1	HStoHY	7	G	HY	34639	Tor-IR	Tor	4	5	50.051
Myo X 3 P1(2020) R1	Myo	1	HStoHY	7	G	HY	34639	Tor-IR	Tor	4	5	67.998
Myo X 3 P1(2020) R1	Myo	1	HStoHY	7	G	HY	34639	Tor-IR	Tor	4	5	67.599
Myo X 3 P1(2020) R1	Myo	1	HStoHY	7	G	HY	34639	Tor-IR	Tor	4	5	56.233
Myo X 3 P1(2020) R1	Myo	1	HStoHY	7	G	HY	34639	Tor-IR	Tor	4	5	106.882
Myo X 3 P1(2020) R1	Myo	1	HStoHY	7	G	HY	34639	Tor-IR	Tor	4	5	109.275
Myo X 3 P1(2020) R1	Myo	1	HStoHY	7	G	HY	34639	Tor-IR	Tor	4	5	147.162
Myo X 3 P1(2020) R1	Myo	1	HStoHY	7	G	HY	34639	Tor-IR	Tor	4	5	164.511
Myo X 3 P1(2020) R1	Myo	1	HStoHY	7	G	HY	34639	Tor-IR	Tor	4	5	73.382
Myo X 3 P1(2020) R1	Myo	1	HStoHY	7	G	HY	34639	Tor-IR	Tor	4	5	85.147
Myo X 3 P1(2020) R1	Myo	1	HStoHY	7	G	HY	34639	Tor-IR	Tor	4	5	74.977
Myo X 3 P1(2020) R1	Myo	1	HStoHY	7	G	HY	34639	Tor-IR	Tor	4	6	66.203
Myo X 3 P1(2020) R1	Myo	1	HStoHY	7	G	HY	34639	Tor-IR	Tor	4	6	115.257
Myo X 3 P1(2020) R1	Myo	1	HStoHY	7	G	HY	34639	Tor-IR	Tor	4	6	207.184
Myo X 3 P1(2020) R1	Myo	1	HStoHY	7	G	HY	34639	Tor-IR	Tor	4	6	137.391
Myo X 3 P1(2020) R1	Myo	1	HStoHY	7	G	HY	34639	Tor-IR	Tor	4	6	186.046
Myo X 3 P1(2020) R1	Myo	1	HStoHY	7	G	HY	34639	Tor-IR	Tor	4	6	149.954
Myo X 3 P1(2020) R1	Myo	1	HStoHY	7	G	HY	34639	Tor-IR	Tor	4	6	232.109
Myo X 3 P1(2020) R1	Myo	1	HStoHY	7	G	HY	34639	Tor-IR	Tor	4	6	150.153
Myo X 3 P1(2020) R1	Myo	1	HStoHY	7	G	HY	34639	Tor-IR	Tor	4	6	241.282
Myo X 3 P1(2020) R1	Myo	1	HStoHY	7	G	HY	34639	Tor-IR	Tor	4	6	123.034
Myo X 3 P1(2020) R1	Myo	1	HStoHY	7	G	HY	34639	Tor-IR	Tor	4	6	114.659
Myo X 3 P1(2020) R1	Myo	1	HStoHY	7	G	HY	34639	Tor-IR	Tor	4	6	71.587
Myo X 3 P1(2020) R1	Myo	1	HStoHY	7	G	HY	34639	Tor-IR	Tor	4	6	369.899
Myo X 3 P1(2020) R1	Myo	1	HStoHY	7	G	HY	34639	Tor-IR	Tor	4	6	396.421
Myo X 3 P1(2020) R1	Myo	1	HStoHY	7	G	HY	34639	Tor-IR	Tor	4	6	409.581
Myo X 3 P1(2020) R1	Myo	1	HStoHY	7	G	HY	34639	Tor-IR	Tor	4	6	136.992
Myo X 3 P1(2020) R1	Myo	1	HStoHY	7	G	HY	34639	Tor-IR	Tor	4	6	210.972
Myo X 3 P1(2020) R1	Myo	1	HStoHY	7	G	HY	34639	Tor-IR	Tor	4	6	92.924
Myo X 3 P1(2020) R1	Myo	1	HStoHY	7	G	HY	34639	Tor-IR	Tor	4	6	93.721
Myo X 3 P1(2020) R1	Myo	1	HStoHY	7	G	HY	34639	Tor-IR	Tor	4	6	358.533
Myo X 3 P1(2020) R1	Myo	1	HStoHY	7	G	HY	34639	Tor-IR	Tor	4	6	167.302
Myo X 3 P1(2020) R1	Myo	1	HStoHY	7	G	HY	34639	Tor-IR	Tor	4	6	100.9
Myo X 3 P1(2020) R1	Myo	1	HStoHY	7	G	HY	34639	Tor-IR	Tor	4	6	251.452
Myo X 3 P1(2020) R1	Myo	1	HStoHY	7	G	HY	34639	Tor-IR	Tor	4	6	186.445
Myo X 3 P1(2020) R1	Myo	1	HStoHY	7	G	HY	34639	Tor-IR	Tor	4	6	141.579
Myo X 3 P1(2020) R1	Myo	1	HStoHY	7	G	HY	34639	Tor-IR	Tor	4	6	238.889
Myo X 3 P1(2020) R1	Myo	1	HStoHY	7	G	HY	34639	Tor-IR	Tor	4	6	238.49
Myo X 3 P1(2020) R1	Myo	1	HStoHY	7	G	HY	34639	Tor-IR	Tor	4	6	307.286
Myo X 3 P1(2020) R1	Myo	1	HStoHY	7	G	HY	34639	Tor-IR	Tor	4	6	204.791
Myo X 3 P1(2020) R1	Myo	1	HStoHY	7	G	HY	34639	Tor-IR	Tor	4	6	221.74
Myo X 3 P1(2020) R1	Myo	1	HStoHY	7	G	HY	34639	Tor-IR	Tor	4	6	195.219
Myo X 3 P1(2020) R1	Myo	1	HStoHY	7	G	HY	34639	Tor-IR	Tor	4	6	281.363
Myo X 3 P1(2020) R1	Myo	1	HStoHY	7	G	HY	34639	Tor-IR	Tor	4	7	68.197
Myo X 3 P1(2020) R1	Myo	1	HStoHY	7	G	HY	34639	Tor-IR	Tor	4	7	214.96
Myo X 3 P1(2020) R1	Myo	1	HStoHY	7	G	HY	34639	Tor-IR	Tor	4	7	293.327
Myo X 3 P1(2020) R1	Myo	1	HStoHY	7	G	HY	34639	Tor-IR	Tor	4	7	71.587
Myo X 3 P1(2020) R1	Myo	1	HStoHY	7	G	HY	34639	Tor-IR	Tor	4	7	125.028
Myo X 3 P1(2020) R1	Myo	1	HStoHY	7	G	HY	34639	Tor-IR	Tor	4	7	169.296
Myo X 3 P1(2020) R1	Myo	1	HStoHY	7	G	HY	34639	Tor-IR	Tor	4	7	101.897
Myo X 3 P1(2020) R1	Myo	1	HStoHY	7	G	HY	34639	Tor-IR	Tor	4	7	169.496
Myo X 3 P1(2020) R1	Myo	1	HStoHY	7	G	HY	34639	Tor-IR	Tor	4	7	214.96
Myo X 3 P1(2020) R1	Myo	1	HStoHY	7	G	HY	34639	Tor-IR	Tor	4	7	150.353
Myo X 3 P1(2020) R1	Myo	1	HStoHY	7	G	HY	34639	Tor-IR	Tor	4	7	51.048
Myo X 3 P1(2020) R1	Myo	1	HStoHY	7	G	HY	34639	Tor-IR	Tor	4	7	138.986
Myo X 3 P1(2020) R1	Myo	1	HStoHY	7	G	HY	34639	Tor-IR	Tor	4	7	95.316
Myo X 3 P1(2020) R1	Myo	1	HStoHY	7	G	HY	34639	Tor-IR	Tor	4	7	243.276
Myo X 3 P1(2020) R1	Myo	1	HStoHY	7	G	HY	34639	Tor-IR	Tor	4	7	75.974
Myo X 3 P1(2020) R1	Myo	1	HStoHY	7	G	HY	34639	Tor-IR	Tor	4	7	261.023
Myo X 3 P1(2020) R1	Myo	1	HStoHY	7	G	HY	34639	Tor-IR	Tor	4	7	94.12
Myo X 3 P1(2020) R1	Myo	1	HStoHY	7	G	HY	34639	Tor-IR	Tor	4	7	299.509
Myo X 3 P1(2020) R1	Myo	1	HStoHY	7	G	HY	34639	Tor-IR	Tor	4	7	180.862
Myo X 3 P1(2020) R1	Myo	1	HStoHY	7	G	HY	34639	Tor-IR	Tor	4	7	105.686
Myo X 3 P1(2020) R1	Myo	1	HStoHY	7	G	HY	34639	Tor-IR	Tor	4	7	39.483
Myo X 3 P1(2020) R1	Myo	1	HStoHY	7	G	HY	34639	Tor-IR	Tor	4	7	110.471
Myo X 3 P1(2020) R1	Myo	1	HStoHY	7	G	HY	34639	Tor-IR	Tor	4	7	77.769
Myo X 3 P1(2020) R1	Myo	1	HStoHY	7	G	HY	34639	Tor-IR	Tor	4	7	75.376
Myo X 3 P1(2020) R1	Myo	1	HStoHY	7	G	HY	34639	Tor-IR	Tor	4	7	79.962
Myo X 3 P1(2020) R1	Myo	1	HStoHY	7	G	HY	34639	Tor-IR	Tor	4	7	231.711
Myo X 3 P1(2020) R1	Myo	1	HStoHY	7	G	HY	34639	Tor-IR	Tor	4	7	181.261
Myo X 3 P1(2020) R1	Myo	1	HStoHY	7	G	HY	34639	Tor-IR	Tor	4	7	216.955
Myo X 3 P1(2020) R1	Myo	1	HStoHY	7	G	HY	34639	Tor-IR	Tor	4	7	68.995
Myo X 3 P1(2020) R1	Myo	1	HStoHY	7	G	HY	34639	Tor-IR	Tor	4	7	202.996
Myo X 3 P1(2020) R1	Myo	1	HStoHY	7	G	HY	34639	Tor-IR	Tor	4	8	77.968
Myo X 3 P1(2020) R1	Myo	1	HStoHY	7	G	HY	34639	Tor-IR	Tor	4	8	75.575
Myo X 3 P1(2020) R1	Myo	1	HStoHY	7	G	HY	34639	Tor-IR	Tor	4	8	114.061
Myo X 3 P1(2020) R1	Myo	1	HStoHY	7	G	HY	34639	Tor-IR	Tor	4	8	80.162
Myo X 3 P1(2020) R1	Myo	1	HStoHY	7	G	HY	34639	Tor-IR	Tor	4	8	92.525
Myo X 3 P1(2020) R1	Myo	1	HStoHY	7	G	HY	34639	Tor-IR	Tor	4	8	138.388
Myo X 3 P1(2020) R1	Myo	1	HStoHY	7	G	HY	34639	Tor-IR	Tor	4	8	55.435
Myo X 3 P1(2020) R1	Myo	1	HStoHY	7	G	HY	34639	Tor-IR	Tor	4	8	114.659
Myo X 3 P1(2020) R1	Myo	1	HStoHY	7	G	HY	34639	Tor-IR	Tor	4	8	117.052
Myo X 3 P1(2020) R1	Myo	1	HStoHY	7	G	HY	34639	Tor-IR	Tor	4	8	90.73
Myo X 3 P1(2020) R1	Myo	1	HStoHY	7	G	HY	34639	Tor-IR	Tor	4	8	67.399
Myo X 3 P1(2020) R1	Myo	1	HStoHY	7	G	HY	34639	Tor-IR	Tor	4	8	136.793
Myo X 3 P1(2020) R1	Myo	1	HStoHY	7	G	HY	34639	Tor-IR	Tor	4	8	97.111
Myo X 3 P1(2020) R1	Myo	1	HStoHY	7	G	HY	34639	Tor-IR	Tor	4	8	65.405
Myo X 3 P1(2020) R1	Myo	1	HStoHY	7	G	HY	34639	Tor-IR	Tor	4	8	111.867
Myo X 3 P1(2020) R1	Myo	1	HStoHY	7	G	HY	34639	Tor-IR	Tor	4	8	84.15
Myo X 3 P1(2020) R1	Myo	1	HStoHY	7	G	HY	34639	Tor-IR	Tor	4	8	157.332
Myo X 3 P1(2020) R1	Myo	1	HStoHY	7	G	HY	34639	Tor-IR	Tor	4	8	64.209
Myo X 3 P1(2020) R1	Myo	1	HStoHY	7	G	HY	34639	Tor-IR	Tor	4	8	88.736
Myo X 3 P1(2020) R1	Myo	1	HStoHY	7	G	HY	34639	Tor-IR	Tor	4	8	100.9
Myo X 3 P1(2020) R1	Myo	1	HStoHY	7	G	HY	34639	Tor-IR	Tor	4	8	115.456
Myo X 3 P1(2020) R1	Myo	1	HStoHY	7	G	HY	34639	Tor-IR	Tor	4	8	137.989
Myo X 3 P1(2020) R1	Myo	1	HStoHY	7	G	HY	34639	Tor-IR	Tor	4	8	50.45
Myo X 3 P1(2020) R1	Myo	1	HStoHY	7	G	HY	34639	Tor-IR	Tor	4	8	69.792
Myo X 3 P1(2020) R1	Myo	1	HStoHY	7	G	HY	34639	Tor-IR	Tor	4	8	110.272
Myo X 3 P1(2020) R1	Myo	1	HStoHY	7	G	HY	34639	Tor-IR	Tor	4	8	151.948
Myo X 3 P1(2020) R1	Myo	1	HStoHY	7	G	HY	34639	Tor-IR	Tor	4	8	66.203
Myo X 3 P1(2020) R1	Myo	1	HStoHY	7	G	HY	34639	Tor-IR	Tor	4	8	84.349
Myo X 3 P1(2020) R1	Myo	1	HStoHY	7	G	HY	34639	Tor-IR	Tor	4	8	140.183
Myo X 3 P1(2020) R1	Myo	1	HStoHY	7	G	HY	34639	Tor-IR	Tor	4	8	105.287
Myo X 2 P1(2020) R2	Myo	2	HStoHY	7	G	HY	34639	Tor-IR	Tor	4	1	125.227
Myo X 2 P1(2020) R2	Myo	2	HStoHY	7	G	HY	34639	Tor-IR	Tor	4	1	134.4
Myo X 2 P1(2020) R2	Myo	2	HStoHY	7	G	HY	34639	Tor-IR	Tor	4	1	94.918
Myo X 2 P1(2020) R2	Myo	2	HStoHY	7	G	HY	34639	Tor-IR	Tor	4	1	239.687
Myo X 2 P1(2020) R2	Myo	2	HStoHY	7	G	HY	34639	Tor-IR	Tor	4	1	272.788
Myo X 2 P1(2020) R2	Myo	2	HStoHY	7	G	HY	34639	Tor-IR	Tor	4	1	290.137
Myo X 2 P1(2020) R2	Myo	2	HStoHY	7	G	HY	34639	Tor-IR	Tor	4	1	275.979
Myo X 2 P1(2020) R2	Myo	2	HStoHY	7	G	HY	34639	Tor-IR	Tor	4	1	122.236
Myo X 2 P1(2020) R2	Myo	2	HStoHY	7	G	HY	34639	Tor-IR	Tor	4	1	192.427
Myo X 2 P1(2020) R2	Myo	2	HStoHY	7	G	HY	34639	Tor-IR	Tor	4	1	113.263
Myo X 2 P1(2020) R2	Myo	2	HStoHY	7	G	HY	34639	Tor-IR	Tor	4	1	125.227
Myo X 2 P1(2020) R2	Myo	2	HStoHY	7	G	HY	34639	Tor-IR	Tor	4	1	196.216
Myo X 2 P1(2020) R2	Myo	2	HStoHY	7	G	HY	34639	Tor-IR	Tor	4	1	86.742
Myo X 2 P1(2020) R2	Myo	2	HStoHY	7	G	HY	34639	Tor-IR	Tor	4	1	178.469
Myo X 2 P1(2020) R2	Myo	2	HStoHY	7	G	HY	34639	Tor-IR	Tor	4	1	217.353
Myo X 2 P1(2020) R2	Myo	2	HStoHY	7	G	HY	34639	Tor-IR	Tor	4	1	77.569
Myo X 2 P1(2020) R2	Myo	2	HStoHY	7	G	HY	34639	Tor-IR	Tor	4	1	384.456
Myo X 2 P1(2020) R2	Myo	2	HStoHY	7	G	HY	34639	Tor-IR	Tor	4	1	337.596
Myo X 2 P1(2020) R2	Myo	2	HStoHY	7	G	HY	34639	Tor-IR	Tor	4	1	213.166
Myo X 2 P1(2020) R2	Myo	2	HStoHY	7	G	HY	34639	Tor-IR	Tor	4	1	82.156
Myo X 2 P1(2020) R2	Myo	2	HStoHY	7	G	HY	34639	Tor-IR	Tor	4	1	155.537
Myo X 2 P1(2020) R2	Myo	2	HStoHY	7	G	HY	34639	Tor-IR	Tor	4	1	350.358
Myo X 2 P1(2020) R2	Myo	2	HStoHY	7	G	HY	34639	Tor-IR	Tor	4	1	230.714
Myo X 2 P1(2020) R2	Myo	2	HStoHY	7	G	HY	34639	Tor-IR	Tor	4	1	91.927
Myo X 2 P1(2020) R2	Myo	2	HStoHY	7	G	HY	34639	Tor-IR	Tor	4	1	174.481
Myo X 2 P1(2020) R2	Myo	2	HStoHY	7	G	HY	34639	Tor-IR	Tor	4	1	178.27
Myo X 2 P1(2020) R2	Myo	2	HStoHY	7	G	HY	34639	Tor-IR	Tor	4	1	71.188
Myo X 2 P1(2020) R2	Myo	2	HStoHY	7	G	HY	34639	Tor-IR	Tor	4	1	400.808
Myo X 2 P1(2020) R2	Myo	2	HStoHY	7	G	HY	34639	Tor-IR	Tor	4	1	81.956
Myo X 2 P1(2020) R2	Myo	2	HStoHY	7	G	HY	34639	Tor-IR	Tor	4	1	129.415
Myo X 2 P1(2020) R2	Myo	2	HStoHY	7	G	HY	34639	Tor-IR	Tor	4	2	80.56
Myo X 2 P1(2020) R2	Myo	2	HStoHY	7	G	HY	34639	Tor-IR	Tor	4	2	85.147
Myo X 2 P1(2020) R2	Myo	2	HStoHY	7	G	HY	34639	Tor-IR	Tor	4	2	60.221
Myo X 2 P1(2020) R2	Myo	2	HStoHY	7	G	HY	34639	Tor-IR	Tor	4	2	75.974
Myo X 2 P1(2020) R2	Myo	2	HStoHY	7	G	HY	34639	Tor-IR	Tor	4	2	158.927
Myo X 2 P1(2020) R2	Myo	2	HStoHY	7	G	HY	34639	Tor-IR	Tor	4	2	121.239
Myo X 2 P1(2020) R2	Myo	2	HStoHY	7	G	HY	34639	Tor-IR	Tor	4	2	103.891
Myo X 2 P1(2020) R2	Myo	2	HStoHY	7	G	HY	34639	Tor-IR	Tor	4	2	123.832
Myo X 2 P1(2020) R2	Myo	2	HStoHY	7	G	HY	34639	Tor-IR	Tor	4	2	99.903
Myo X 2 P1(2020) R2	Myo	2	HStoHY	7	G	HY	34639	Tor-IR	Tor	4	2	163.912
Myo X 2 P1(2020) R2	Myo	2	HStoHY	7	G	HY	34639	Tor-IR	Tor	4	2	153.344
Myo X 2 P1(2020) R2	Myo	2	HStoHY	7	G	HY	34639	Tor-IR	Tor	4	2	142.177
Myo X 2 P1(2020) R2	Myo	2	HStoHY	7	G	HY	34639	Tor-IR	Tor	4	2	116.454
Myo X 2 P1(2020) R2	Myo	2	HStoHY	7	G	HY	34639	Tor-IR	Tor	4	2	103.492
Myo X 2 P1(2020) R2	Myo	2	HStoHY	7	G	HY	34639	Tor-IR	Tor	4	2	111.07
Myo X 2 P1(2020) R2	Myo	2	HStoHY	7	G	HY	34639	Tor-IR	Tor	4	2	111.07
Myo X 2 P1(2020) R2	Myo	2	HStoHY	7	G	HY	34639	Tor-IR	Tor	4	2	307.485
Myo X 2 P1(2020) R2	Myo	2	HStoHY	7	G	HY	34639	Tor-IR	Tor	4	2	100.9
Myo X 2 P1(2020) R2	Myo	2	HStoHY	7	G	HY	34639	Tor-IR	Tor	4	2	150.153
Myo X 2 P1(2020) R2	Myo	2	HStoHY	7	G	HY	34639	Tor-IR	Tor	4	2	167.701
Myo X 2 P1(2020) R2	Myo	2	HStoHY	7	G	HY	34639	Tor-IR	Tor	4	2	146.365
Myo X 2 P1(2020) R2	Myo	2	HStoHY	7	G	HY	34639	Tor-IR	Tor	4	2	147.561
Myo X 2 P1(2020) R2	Myo	2	HStoHY	7	G	HY	34639	Tor-IR	Tor	4	2	178.668
Myo X 2 P1(2020) R2	Myo	2	HStoHY	7	G	HY	34639	Tor-IR	Tor	4	2	145.766
Myo X 2 P1(2020) R2	Myo	2	HStoHY	7	G	HY	34639	Tor-IR	Tor	4	2	154.74
Myo X 2 P1(2020) R2	Myo	2	HStoHY	7	G	HY	34639	Tor-IR	Tor	4	2	141.778
Myo X 2 P1(2020) R2	Myo	2	HStoHY	7	G	HY	34639	Tor-IR	Tor	4	3	131.21
Myo X 2 P1(2020) R2	Myo	2	HStoHY	7	G	HY	34639	Tor-IR	Tor	4	3	109.873
Myo X 2 P1(2020) R2	Myo	2	HStoHY	7	G	HY	34639	Tor-IR	Tor	4	3	133.802
Myo X 2 P1(2020) R2	Myo	2	HStoHY	7	G	HY	34639	Tor-IR	Tor	4	3	91.528
Myo X 2 P1(2020) R2	Myo	2	HStoHY	7	G	HY	34639	Tor-IR	Tor	4	3	107.68
Myo X 2 P1(2020) R2	Myo	2	HStoHY	7	G	HY	34639	Tor-IR	Tor	4	3	149.555
Myo X 2 P1(2020) R2	Myo	2	HStoHY	7	G	HY	34639	Tor-IR	Tor	4	3	139.784
Myo X 2 P1(2020) R2	Myo	2	HStoHY	7	G	HY	34639	Tor-IR	Tor	4	3	125.227
Myo X 2 P1(2020) R2	Myo	2	HStoHY	7	G	HY	34639	Tor-IR	Tor	4	3	96.114
Myo X 2 P1(2020) R2	Myo	2	HStoHY	7	G	HY	34639	Tor-IR	Tor	4	3	102.894
Myo X 2 P1(2020) R2	Myo	2	HStoHY	7	G	HY	34639	Tor-IR	Tor	4	3	148.957
Myo X 2 P1(2020) R2	Myo	2	HStoHY	7	G	HY	34639	Tor-IR	Tor	4	3	71.587
Myo X 2 P1(2020) R2	Myo	2	HStoHY	7	G	HY	34639	Tor-IR	Tor	4	3	139.186
Myo X 2 P1(2020) R2	Myo	2	HStoHY	7	G	HY	34639	Tor-IR	Tor	4	3	79.962
Myo X 2 P1(2020) R2	Myo	2	HStoHY	7	G	HY	34639	Tor-IR	Tor	4	3	134.201
Myo X 2 P1(2020) R2	Myo	2	HStoHY	7	G	HY	34639	Tor-IR	Tor	4	3	119.644
Myo X 2 P1(2020) R2	Myo	2	HStoHY	7	G	HY	34639	Tor-IR	Tor	4	3	142.376
Myo X 2 P1(2020) R2	Myo	2	HStoHY	7	G	HY	34639	Tor-IR	Tor	4	3	85.745
Myo X 2 P1(2020) R2	Myo	2	HStoHY	7	G	HY	34639	Tor-IR	Tor	4	3	140.382
Myo X 2 P1(2020) R2	Myo	2	HStoHY	7	G	HY	34639	Tor-IR	Tor	4	3	258.431
Myo X 2 P1(2020) R2	Myo	2	HStoHY	7	G	HY	34639	Tor-IR	Tor	4	3	95.516
Myo X 2 P1(2020) R2	Myo	2	HStoHY	7	G	HY	34639	Tor-IR	Tor	4	3	144.57
Myo X 2 P1(2020) R2	Myo	2	HStoHY	7	G	HY	34639	Tor-IR	Tor	4	3	76.772
Myo X 2 P1(2020) R2	Myo	2	HStoHY	7	G	HY	34639	Tor-IR	Tor	4	3	126.224
Myo X 2 P1(2020) R2	Myo	2	HStoHY	7	G	HY	34639	Tor-IR	Tor	4	3	107.081
Myo X 2 P1(2020) R2	Myo	2	HStoHY	7	G	HY	34639	Tor-IR	Tor	4	3	148.957
Myo X 2 P1(2020) R2	Myo	2	HStoHY	7	G	HY	34639	Tor-IR	Tor	4	3	142.775
Myo X 2 P1(2020) R2	Myo	2	HStoHY	7	G	HY	34639	Tor-IR	Tor	4	3	150.153
Myo X 2 P1(2020) R2	Myo	2	HStoHY	7	G	HY	34639	Tor-IR	Tor	4	3	163.912
Myo X 2 P1(2020) R2	Myo	2	HStoHY	7	G	HY	34639	Tor-IR	Tor	4	3	231.91
Myo X 2 P1(2020) R2	Myo	2	HStoHY	7	G	HY	34639	Tor-IR	Tor	4	4	165.508
Myo X 2 P1(2020) R2	Myo	2	HStoHY	7	G	HY	34639	Tor-IR	Tor	4	4	211.371
Myo X 2 P1(2020) R2	Myo	2	HStoHY	7	G	HY	34639	Tor-IR	Tor	4	4	274.982
Myo X 2 P1(2020) R2	Myo	2	HStoHY	7	G	HY	34639	Tor-IR	Tor	4	4	204.392
Myo X 2 P1(2020) R2	Myo	2	HStoHY	7	G	HY	34639	Tor-IR	Tor	4	4	143.772
Myo X 2 P1(2020) R2	Myo	2	HStoHY	7	G	HY	34639	Tor-IR	Tor	4	4	144.171
Myo X 2 P1(2020) R2	Myo	2	HStoHY	7	G	HY	34639	Tor-IR	Tor	4	4	193.425
Myo X 2 P1(2020) R2	Myo	2	HStoHY	7	G	HY	34639	Tor-IR	Tor	4	4	129.814
Myo X 2 P1(2020) R2	Myo	2	HStoHY	7	G	HY	34639	Tor-IR	Tor	4	4	172.088
Myo X 2 P1(2020) R2	Myo	2	HStoHY	7	G	HY	34639	Tor-IR	Tor	4	4	228.919
Myo X 2 P1(2020) R2	Myo	2	HStoHY	7	G	HY	34639	Tor-IR	Tor	4	4	500.91
Myo X 2 P1(2020) R2	Myo	2	HStoHY	7	G	HY	34639	Tor-IR	Tor	4	4	187.044
Myo X 2 P1(2020) R2	Myo	2	HStoHY	7	G	HY	34639	Tor-IR	Tor	4	4	343.578
Myo X 2 P1(2020) R2	Myo	2	HStoHY	7	G	HY	34639	Tor-IR	Tor	4	4	210.972
Myo X 2 P1(2020) R2	Myo	2	HStoHY	7	G	HY	34639	Tor-IR	Tor	4	4	192.228
Myo X 2 P1(2020) R2	Myo	2	HStoHY	7	G	HY	34639	Tor-IR	Tor	4	4	227.324
Myo X 2 P1(2020) R2	Myo	2	HStoHY	7	G	HY	34639	Tor-IR	Tor	4	4	215.16
Myo X 2 P1(2020) R2	Myo	2	HStoHY	7	G	HY	34639	Tor-IR	Tor	4	4	350.756
Myo X 2 P1(2020) R2	Myo	2	HStoHY	7	G	HY	34639	Tor-IR	Tor	4	4	183.055
Myo X 2 P1(2020) R2	Myo	2	HStoHY	7	G	HY	34639	Tor-IR	Tor	4	4	271.791
Myo X 2 P1(2020) R2	Myo	2	HStoHY	7	G	HY	34639	Tor-IR	Tor	4	4	210.574
Myo X 2 P1(2020) R2	Myo	2	HStoHY	7	G	HY	34639	Tor-IR	Tor	4	4	210.574
Myo X 2 P1(2020) R2	Myo	2	HStoHY	7	G	HY	34639	Tor-IR	Tor	4	4	195.219
Myo X 2 P1(2020) R2	Myo	2	HStoHY	7	G	HY	34639	Tor-IR	Tor	4	4	226.725
Myo X 2 P1(2020) R2	Myo	2	HStoHY	7	G	HY	34639	Tor-IR	Tor	4	4	224.532
Myo X 2 P1(2020) R2	Myo	2	HStoHY	7	G	HY	34639	Tor-IR	Tor	4	4	139.585
Myo X 2 P1(2020) R2	Myo	2	HStoHY	7	G	HY	34639	Tor-IR	Tor	4	4	186.445
Myo X 2 P1(2020) R2	Myo	2	HStoHY	7	G	HY	34639	Tor-IR	Tor	4	4	294.125
Myo X 2 P1(2020) R2	Myo	2	HStoHY	7	G	HY	34639	Tor-IR	Tor	4	4	249.059
Myo X 2 P1(2020) R2	Myo	2	HStoHY	7	G	HY	34639	Tor-IR	Tor	4	4	141.18
Myo X 2 P1(2020) R2	Myo	2	HStoHY	7	G	HY	34639	Tor-IR	Tor	4	5	97.111
Myo X 2 P1(2020) R2	Myo	2	HStoHY	7	G	HY	34639	Tor-IR	Tor	4	5	115.456
Myo X 2 P1(2020) R2	Myo	2	HStoHY	7	G	HY	34639	Tor-IR	Tor	4	5	106.284
Myo X 2 P1(2020) R2	Myo	2	HStoHY	7	G	HY	34639	Tor-IR	Tor	4	5	145.168
Myo X 2 P1(2020) R2	Myo	2	HStoHY	7	G	HY	34639	Tor-IR	Tor	4	5	161.719
Myo X 2 P1(2020) R2	Myo	2	HStoHY	7	G	HY	34639	Tor-IR	Tor	4	5	149.356
Myo X 2 P1(2020) R2	Myo	2	HStoHY	7	G	HY	34639	Tor-IR	Tor	4	5	175.677
Myo X 2 P1(2020) R2	Myo	2	HStoHY	7	G	HY	34639	Tor-IR	Tor	4	5	67.399
Myo X 2 P1(2020) R2	Myo	2	HStoHY	7	G	HY	34639	Tor-IR	Tor	4	5	47.259
Myo X 2 P1(2020) R2	Myo	2	HStoHY	7	G	HY	34639	Tor-IR	Tor	4	5	145.766
Myo X 2 P1(2020) R2	Myo	2	HStoHY	7	G	HY	34639	Tor-IR	Tor	4	5	122.835
Myo X 2 P1(2020) R2	Myo	2	HStoHY	7	G	HY	34639	Tor-IR	Tor	4	5	119.445
Myo X 2 P1(2020) R2	Myo	2	HStoHY	7	G	HY	34639	Tor-IR	Tor	4	5	136.594
Myo X 2 P1(2020) R2	Myo	2	HStoHY	7	G	HY	34639	Tor-IR	Tor	4	5	62.414
Myo X 2 P1(2020) R2	Myo	2	HStoHY	7	G	HY	34639	Tor-IR	Tor	4	5	137.391
Myo X 2 P1(2020) R2	Myo	2	HStoHY	7	G	HY	34639	Tor-IR	Tor	4	5	175.279
Myo X 2 P1(2020) R2	Myo	2	HStoHY	7	G	HY	34639	Tor-IR	Tor	4	5	75.376
Myo X 2 P1(2020) R2	Myo	2	HStoHY	7	G	HY	34639	Tor-IR	Tor	4	5	66.203
Myo X 2 P1(2020) R2	Myo	2	HStoHY	7	G	HY	34639	Tor-IR	Tor	4	5	152.347
Myo X 2 P1(2020) R2	Myo	2	HStoHY	7	G	HY	34639	Tor-IR	Tor	4	5	119.445
Myo X 2 P1(2020) R2	Myo	2	HStoHY	7	G	HY	34639	Tor-IR	Tor	4	5	77.569
Myo X 2 P1(2020) R2	Myo	2	HStoHY	7	G	HY	34639	Tor-IR	Tor	4	5	68.995
Myo X 2 P1(2020) R2	Myo	2	HStoHY	7	G	HY	34639	Tor-IR	Tor	4	5	62.813
Myo X 2 P1(2020) R2	Myo	2	HStoHY	7	G	HY	34639	Tor-IR	Tor	4	5	88.337
Myo X 2 P1(2020) R2	Myo	2	HStoHY	7	G	HY	34639	Tor-IR	Tor	4	5	104.489
Myo X 2 P1(2020) R2	Myo	2	HStoHY	7	G	HY	34639	Tor-IR	Tor	4	5	130.811
Myo X 2 P1(2020) R2	Myo	2	HStoHY	7	G	HY	34639	Tor-IR	Tor	4	5	84.15
Myo X 2 P1(2020) R2	Myo	2	HStoHY	7	G	HY	34639	Tor-IR	Tor	4	5	87.938
Myo X 2 P1(2020) R2	Myo	2	HStoHY	7	G	HY	34639	Tor-IR	Tor	4	5	102.296
Myo X 2 P1(2020) R2	Myo	2	HStoHY	7	G	HY	34639	Tor-IR	Tor	4	5	97.51
Myo X 2 P1(2020) R2	Myo	2	HStoHY	7	G	HY	34639	Tor-IR	Tor	4	6	113.064
Myo X 2 P1(2020) R2	Myo	2	HStoHY	7	G	HY	34639	Tor-IR	Tor	4	6	160.722
Myo X 2 P1(2020) R2	Myo	2	HStoHY	7	G	HY	34639	Tor-IR	Tor	4	6	237.294
Myo X 2 P1(2020) R2	Myo	2	HStoHY	7	G	HY	34639	Tor-IR	Tor	4	6	115.855
Myo X 2 P1(2020) R2	Myo	2	HStoHY	7	G	HY	34639	Tor-IR	Tor	4	6	226.127
Myo X 2 P1(2020) R2	Myo	2	HStoHY	7	G	HY	34639	Tor-IR	Tor	4	6	123.632
Myo X 2 P1(2020) R2	Myo	2	HStoHY	7	G	HY	34639	Tor-IR	Tor	4	6	190.234
Myo X 2 P1(2020) R2	Myo	2	HStoHY	7	G	HY	34639	Tor-IR	Tor	4	6	101.498
Myo X 2 P1(2020) R2	Myo	2	HStoHY	7	G	HY	34639	Tor-IR	Tor	4	6	58.426
Myo X 2 P1(2020) R2	Myo	2	HStoHY	7	G	HY	34639	Tor-IR	Tor	4	6	74.977
Myo X 2 P1(2020) R2	Myo	2	HStoHY	7	G	HY	34639	Tor-IR	Tor	4	6	188.639
Myo X 2 P1(2020) R2	Myo	2	HStoHY	7	G	HY	34639	Tor-IR	Tor	4	6	229.916
Myo X 2 P1(2020) R2	Myo	2	HStoHY	7	G	HY	34639	Tor-IR	Tor	4	6	201.6
Myo X 2 P1(2020) R2	Myo	2	HStoHY	7	G	HY	34639	Tor-IR	Tor	4	6	175.279
Myo X 2 P1(2020) R2	Myo	2	HStoHY	7	G	HY	34639	Tor-IR	Tor	4	6	213.764
Myo X 2 P1(2020) R2	Myo	2	HStoHY	7	G	HY	34639	Tor-IR	Tor	4	6	164.909
Myo X 2 P1(2020) R2	Myo	2	HStoHY	7	G	HY	34639	Tor-IR	Tor	4	6	122.436
Myo X 2 P1(2020) R2	Myo	2	HStoHY	7	G	HY	34639	Tor-IR	Tor	4	6	171.29
Myo X 2 P1(2020) R2	Myo	2	HStoHY	7	G	HY	34639	Tor-IR	Tor	4	6	114.26
Myo X 2 P1(2020) R2	Myo	2	HStoHY	7	G	HY	34639	Tor-IR	Tor	4	6	104.29
Myo X 2 P1(2020) R2	Myo	2	HStoHY	7	G	HY	34639	Tor-IR	Tor	4	6	126.623
Myo X 2 P1(2020) R2	Myo	2	HStoHY	7	G	HY	34639	Tor-IR	Tor	4	6	185.049
Myo X 2 P1(2020) R2	Myo	2	HStoHY	7	G	HY	34639	Tor-IR	Tor	4	6	189.636
Myo X 2 P1(2020) R2	Myo	2	HStoHY	7	G	HY	34639	Tor-IR	Tor	4	6	183.654
Myo X 2 P1(2020) R2	Myo	2	HStoHY	7	G	HY	34639	Tor-IR	Tor	4	6	98.308
Myo X 2 P1(2020) R2	Myo	2	HStoHY	7	G	HY	34639	Tor-IR	Tor	4	6	157.332
Myo X 2 P1(2020) R2	Myo	2	HStoHY	7	G	HY	34639	Tor-IR	Tor	4	6	83.95
Myo X 2 P1(2020) R2	Myo	2	HStoHY	7	G	HY	34639	Tor-IR	Tor	4	6	99.105
Myo X 2 P1(2020) R2	Myo	2	HStoHY	7	G	HY	34639	Tor-IR	Tor	4	6	158.528
Myo X 2 P1(2020) R2	Myo	2	HStoHY	7	G	HY	34639	Tor-IR	Tor	4	6	313.667
Myo X 2 P1(2020) R2	Myo	2	HStoHY	7	G	HY	34639	Tor-IR	Tor	4	8	149.954
Myo X 2 P1(2020) R2	Myo	2	HStoHY	7	G	HY	34639	Tor-IR	Tor	4	8	159.924
Myo X 2 P1(2020) R2	Myo	2	HStoHY	7	G	HY	34639	Tor-IR	Tor	4	8	112.665
Myo X 2 P1(2020) R2	Myo	2	HStoHY	7	G	HY	34639	Tor-IR	Tor	4	8	82.554
Myo X 2 P1(2020) R2	Myo	2	HStoHY	7	G	HY	34639	Tor-IR	Tor	4	8	113.263
Myo X 2 P1(2020) R2	Myo	2	HStoHY	7	G	HY	34639	Tor-IR	Tor	4	8	200.404
Myo X 2 P1(2020) R2	Myo	2	HStoHY	7	G	HY	34639	Tor-IR	Tor	4	8	196.814
Myo X 2 P1(2020) R2	Myo	2	HStoHY	7	G	HY	34639	Tor-IR	Tor	4	8	63.212
Myo X 2 P1(2020) R2	Myo	2	HStoHY	7	G	HY	34639	Tor-IR	Tor	4	8	266.806
Myo X 2 P1(2020) R2	Myo	2	HStoHY	7	G	HY	34639	Tor-IR	Tor	4	8	219.746
Myo X 2 P1(2020) R2	Myo	2	HStoHY	7	G	HY	34639	Tor-IR	Tor	4	8	84.947
Myo X 2 P1(2020) R2	Myo	2	HStoHY	7	G	HY	34639	Tor-IR	Tor	4	8	240.485
Myo X 2 P1(2020) R2	Myo	2	HStoHY	7	G	HY	34639	Tor-IR	Tor	4	8	228.52
Myo X 2 P1(2020) R2	Myo	2	HStoHY	7	G	HY	34639	Tor-IR	Tor	4	8	231.511
Myo X 2 P1(2020) R2	Myo	2	HStoHY	7	G	HY	34639	Tor-IR	Tor	4	8	189.038
Myo X 2 P1(2020) R2	Myo	2	HStoHY	7	G	HY	34639	Tor-IR	Tor	4	8	227.922
Myo X 2 P1(2020) R2	Myo	2	HStoHY	7	G	HY	34639	Tor-IR	Tor	4	8	173.683
Myo X 2 P1(2020) R2	Myo	2	HStoHY	7	G	HY	34639	Tor-IR	Tor	4	8	67.399
Myo X 2 P1(2020) R2	Myo	2	HStoHY	7	G	HY	34639	Tor-IR	Tor	4	8	131.409
Myo X 2 P1(2020) R2	Myo	2	HStoHY	7	G	HY	34639	Tor-IR	Tor	4	8	90.132
Myo X 2 P1(2020) R2	Myo	2	HStoHY	7	G	HY	34639	Tor-IR	Tor	4	8	133.403
Myo X 2 P1(2020) R2	Myo	2	HStoHY	7	G	HY	34639	Tor-IR	Tor	4	8	188.439
Myo X 2 P1(2020) R2	Myo	2	HStoHY	7	G	HY	34639	Tor-IR	Tor	4	8	273.985
Myo X 2 P1(2020) R2	Myo	2	HStoHY	7	G	HY	34639	Tor-IR	Tor	4	8	162.516
Myo X 2 P1(2020) R2	Myo	2	HStoHY	7	G	HY	34639	Tor-IR	Tor	4	8	182.058
Myo X 2 P1(2020) R2	Myo	2	HStoHY	7	G	HY	34639	Tor-IR	Tor	4	8	147.362
Myo X 2 P1(2020) R2	Myo	2	HStoHY	7	G	HY	34639	Tor-IR	Tor	4	8	158.528
Myo X 2 P1(2020) R2	Myo	2	HStoHY	7	G	HY	34639	Tor-IR	Tor	4	8	196.615
Myo X 2 P1(2020) R2	Myo	2	HStoHY	7	G	HY	34639	Tor-IR	Tor	4	8	156.933
Myo X 2 P1(2020) R2	Myo	2	HStoHY	7	G	HY	34639	Tor-IR	Tor	4	8	70.989
Myo X 2 P1(2020) R2	Myo	2	HStoHY	7	G	HY	34639	Tor-IR	Tor	4	9	107.081
Myo X 2 P1(2020) R2	Myo	2	HStoHY	7	G	HY	34639	Tor-IR	Tor	4	9	83.352
Myo X 2 P1(2020) R2	Myo	2	HStoHY	7	G	HY	34639	Tor-IR	Tor	4	9	188.041
Myo X 2 P1(2020) R2	Myo	2	HStoHY	7	G	HY	34639	Tor-IR	Tor	4	9	75.974
Myo X 2 P1(2020) R2	Myo	2	HStoHY	7	G	HY	34639	Tor-IR	Tor	4	9	143.972
Myo X 2 P1(2020) R2	Myo	2	HStoHY	7	G	HY	34639	Tor-IR	Tor	4	9	67.998
Myo X 2 P1(2020) R2	Myo	2	HStoHY	7	G	HY	34639	Tor-IR	Tor	4	9	388.444
Myo X 2 P1(2020) R2	Myo	2	HStoHY	7	G	HY	34639	Tor-IR	Tor	4	9	250.654
Myo X 2 P1(2020) R2	Myo	2	HStoHY	7	G	HY	34639	Tor-IR	Tor	4	9	198.609
Myo X 2 P1(2020) R2	Myo	2	HStoHY	7	G	HY	34639	Tor-IR	Tor	4	9	103.293
Myo X 2 P1(2020) R2	Myo	2	HStoHY	7	G	HY	34639	Tor-IR	Tor	4	9	156.734
Myo X 2 P1(2020) R2	Myo	2	HStoHY	7	G	HY	34639	Tor-IR	Tor	4	9	180.463
Myo X 2 P1(2020) R2	Myo	2	HStoHY	7	G	HY	34639	Tor-IR	Tor	4	9	330.018
Myo X 2 P1(2020) R2	Myo	2	HStoHY	7	G	HY	34639	Tor-IR	Tor	4	9	162.915
Myo X 2 P1(2020) R2	Myo	2	HStoHY	7	G	HY	34639	Tor-IR	Tor	4	9	184.451
Myo X 2 P1(2020) R2	Myo	2	HStoHY	7	G	HY	34639	Tor-IR	Tor	4	9	248.461
Myo X 2 P1(2020) R2	Myo	2	HStoHY	7	G	HY	34639	Tor-IR	Tor	4	9	243.276
Myo X 2 P1(2020) R2	Myo	2	HStoHY	7	G	HY	34639	Tor-IR	Tor	4	9	190.633
Myo X 2 P1(2020) R2	Myo	2	HStoHY	7	G	HY	34639	Tor-IR	Tor	4	9	198.21
Myo X 2 P1(2020) R2	Myo	2	HStoHY	7	G	HY	34639	Tor-IR	Tor	4	9	81.757
Myo X 2 P1(2020) R2	Myo	2	HStoHY	7	G	HY	34639	Tor-IR	Tor	4	9	143.373
Myo X 2 P1(2020) R2	Myo	2	HStoHY	7	G	HY	34639	Tor-IR	Tor	4	9	87.938
Myo X 2 P1(2020) R2	Myo	2	HStoHY	7	G	HY	34639	Tor-IR	Tor	4	9	92.924
Myo X 2 P1(2020) R2	Myo	2	HStoHY	7	G	HY	34639	Tor-IR	Tor	4	9	121.838
Myo X 2 P1(2020) R2	Myo	2	HStoHY	7	G	HY	34639	Tor-IR	Tor	4	9	83.352
Myo X 2 P1(2020) R2	Myo	2	HStoHY	7	G	HY	34639	Tor-IR	Tor	4	9	160.124
Myo X 2 P1(2020) R2	Myo	2	HStoHY	7	G	HY	34639	Tor-IR	Tor	4	9	100.302
Myo X 2 P1(2020) R2	Myo	2	HStoHY	7	G	HY	34639	Tor-IR	Tor	4	9	184.451
Myo X 2 P1(2020) R2	Myo	2	HStoHY	7	G	HY	34639	Tor-IR	Tor	4	9	184.651
Myo X 2 P1(2020) R2	Myo	2	HStoHY	7	G	HY	34639	Tor-IR	Tor	4	9	344.575
Myo X 8 P1(2020) R2	Myo	2	HStoHY	7	G	HY	Cs	Control	Control	4	1	419.153
Myo X 8 P1(2020) R2	Myo	2	HStoHY	7	G	HY	Cs	Control	Control	4	1	255.839
Myo X 8 P1(2020) R2	Myo	2	HStoHY	7	G	HY	Cs	Control	Control	4	1	318.652
Myo X 8 P1(2020) R2	Myo	2	HStoHY	7	G	HY	Cs	Control	Control	4	1	266.009
Myo X 8 P1(2020) R2	Myo	2	HStoHY	7	G	HY	Cs	Control	Control	4	1	218.55
Myo X 8 P1(2020) R2	Myo	2	HStoHY	7	G	HY	Cs	Control	Control	4	1	225.13
Myo X 8 P1(2020) R2	Myo	2	HStoHY	7	G	HY	Cs	Control	Control	4	1	273.187
Myo X 8 P1(2020) R2	Myo	2	HStoHY	7	G	HY	Cs	Control	Control	4	1	256.636
Myo X 8 P1(2020) R2	Myo	2	HStoHY	7	G	HY	Cs	Control	Control	4	1	268.601
Myo X 8 P1(2020) R2	Myo	2	HStoHY	7	G	HY	Cs	Control	Control	4	1	210.773
Myo X 8 P1(2020) R2	Myo	2	HStoHY	7	G	HY	Cs	Control	Control	4	1	175.079
Myo X 8 P1(2020) R2	Myo	2	HStoHY	7	G	HY	Cs	Control	Control	4	1	148.757
Myo X 8 P1(2020) R2	Myo	2	HStoHY	7	G	HY	Cs	Control	Control	4	1	332.012
Myo X 8 P1(2020) R2	Myo	2	HStoHY	7	G	HY	Cs	Control	Control	4	1	245.071
Myo X 8 P1(2020) R2	Myo	2	HStoHY	7	G	HY	Cs	Control	Control	4	1	221.74
Myo X 8 P1(2020) R2	Myo	2	HStoHY	7	G	HY	Cs	Control	Control	4	1	115.456
Myo X 8 P1(2020) R2	Myo	2	HStoHY	7	G	HY	Cs	Control	Control	4	1	120.641
Myo X 8 P1(2020) R2	Myo	2	HStoHY	7	G	HY	Cs	Control	Control	4	1	97.51
Myo X 8 P1(2020) R2	Myo	2	HStoHY	7	G	HY	Cs	Control	Control	4	1	243.874
Myo X 8 P1(2020) R2	Myo	2	HStoHY	7	G	HY	Cs	Control	Control	4	1	203.395
Myo X 8 P1(2020) R2	Myo	2	HStoHY	7	G	HY	Cs	Control	Control	4	1	349.959
Myo X 8 P1(2020) R2	Myo	2	HStoHY	7	G	HY	Cs	Control	Control	4	1	145.368
Myo X 8 P1(2020) R2	Myo	2	HStoHY	7	G	HY	Cs	Control	Control	4	1	143.772
Myo X 8 P1(2020) R2	Myo	2	HStoHY	7	G	HY	Cs	Control	Control	4	1	244.273
Myo X 8 P1(2020) R2	Myo	2	HStoHY	7	G	HY	Cs	Control	Control	4	1	157.133
Myo X 8 P1(2020) R2	Myo	2	HStoHY	7	G	HY	Cs	Control	Control	4	1	176.276
Myo X 8 P1(2020) R2	Myo	2	HStoHY	7	G	HY	Cs	Control	Control	4	1	174.281
Myo X 8 P1(2020) R2	Myo	2	HStoHY	7	G	HY	Cs	Control	Control	4	1	217.353
Myo X 8 P1(2020) R2	Myo	2	HStoHY	7	G	HY	Cs	Control	Control	4	1	238.889
Myo X 8 P1(2020) R2	Myo	2	HStoHY	7	G	HY	Cs	Control	Control	4	1	218.949
Myo X 8 P1(2020) R2	Myo	2	HStoHY	7	G	HY	Cs	Control	Control	4	1	124.23
Myo X 8 P1(2020) R2	Myo	2	HStoHY	7	G	HY	Cs	Control	Control	4	2	508.288
Myo X 8 P1(2020) R2	Myo	2	HStoHY	7	G	HY	Cs	Control	Control	4	2	233.106
Myo X 8 P1(2020) R2	Myo	2	HStoHY	7	G	HY	Cs	Control	Control	4	2	340.986
Myo X 8 P1(2020) R2	Myo	2	HStoHY	7	G	HY	Cs	Control	Control	4	2	318.851
Myo X 8 P1(2020) R2	Myo	2	HStoHY	7	G	HY	Cs	Control	Control	4	2	309.679
Myo X 8 P1(2020) R2	Myo	2	HStoHY	7	G	HY	Cs	Control	Control	4	2	392.432
Myo X 8 P1(2020) R2	Myo	2	HStoHY	7	G	HY	Cs	Control	Control	4	2	553.752
Myo X 8 P1(2020) R2	Myo	2	HStoHY	7	G	HY	Cs	Control	Control	4	2	175.478
Myo X 8 P1(2020) R2	Myo	2	HStoHY	7	G	HY	Cs	Control	Control	4	2	144.769
Myo X 8 P1(2020) R2	Myo	2	HStoHY	7	G	HY	Cs	Control	Control	4	2	401.007
Myo X 8 P1(2020) R2	Myo	2	HStoHY	7	G	HY	Cs	Control	Control	4	2	555.946
Myo X 8 P1(2020) R2	Myo	2	HStoHY	7	G	HY	Cs	Control	Control	4	2	200.404
Myo X 8 P1(2020) R2	Myo	2	HStoHY	7	G	HY	Cs	Control	Control	4	2	220.145
Myo X 8 P1(2020) R2	Myo	2	HStoHY	7	G	HY	Cs	Control	Control	4	2	245.669
Myo X 8 P1(2020) R2	Myo	2	HStoHY	7	G	HY	Cs	Control	Control	4	2	290.137
Myo X 8 P1(2020) R2	Myo	2	HStoHY	7	G	HY	Cs	Control	Control	4	2	438.695
Myo X 8 P1(2020) R2	Myo	2	HStoHY	7	G	HY	Cs	Control	Control	4	2	206.984
Myo X 8 P1(2020) R2	Myo	2	HStoHY	7	G	HY	Cs	Control	Control	4	2	265.809
Myo X 8 P1(2020) R2	Myo	2	HStoHY	7	G	HY	Cs	Control	Control	4	2	293.128
Myo X 8 P1(2020) R2	Myo	2	HStoHY	7	G	HY	Cs	Control	Control	4	2	250.654
Myo X 8 P1(2020) R2	Myo	2	HStoHY	7	G	HY	Cs	Control	Control	4	2	344.974
Myo X 8 P1(2020) R2	Myo	2	HStoHY	7	G	HY	Cs	Control	Control	4	2	182.058
Myo X 8 P1(2020) R2	Myo	2	HStoHY	7	G	HY	Cs	Control	Control	4	2	313.667
Myo X 8 P1(2020) R2	Myo	2	HStoHY	7	G	HY	Cs	Control	Control	4	2	269.398
Myo X 8 P1(2020) R2	Myo	2	HStoHY	7	G	HY	Cs	Control	Control	4	2	118.248
Myo X 8 P1(2020) R2	Myo	2	HStoHY	7	G	HY	Cs	Control	Control	4	2	344.974
Myo X 8 P1(2020) R2	Myo	2	HStoHY	7	G	HY	Cs	Control	Control	4	2	286.946
Myo X 8 P1(2020) R2	Myo	2	HStoHY	7	G	HY	Cs	Control	Control	4	2	149.954
Myo X 8 P1(2020) R2	Myo	2	HStoHY	7	G	HY	Cs	Control	Control	4	2	251.252
Myo X 8 P1(2020) R2	Myo	2	HStoHY	7	G	HY	Cs	Control	Control	4	2	270.196
Myo X 8 P1(2020) R2	Myo	2	HStoHY	7	G	HY	Cs	Control	Control	4	3	447.469
Myo X 8 P1(2020) R2	Myo	2	HStoHY	7	G	HY	Cs	Control	Control	4	3	150.951
Myo X 8 P1(2020) R2	Myo	2	HStoHY	7	G	HY	Cs	Control	Control	4	3	167.502
Myo X 8 P1(2020) R2	Myo	2	HStoHY	7	G	HY	Cs	Control	Control	4	3	151.15
Myo X 8 P1(2020) R2	Myo	2	HStoHY	7	G	HY	Cs	Control	Control	4	3	159.525
Myo X 8 P1(2020) R2	Myo	2	HStoHY	7	G	HY	Cs	Control	Control	4	3	161.32
Myo X 8 P1(2020) R2	Myo	2	HStoHY	7	G	HY	Cs	Control	Control	4	3	222.339
Myo X 8 P1(2020) R2	Myo	2	HStoHY	7	G	HY	Cs	Control	Control	4	3	187.044
Myo X 8 P1(2020) R2	Myo	2	HStoHY	7	G	HY	Cs	Control	Control	4	3	272.788
Myo X 8 P1(2020) R2	Myo	2	HStoHY	7	G	HY	Cs	Control	Control	4	3	531.618
Myo X 8 P1(2020) R2	Myo	2	HStoHY	7	G	HY	Cs	Control	Control	4	3	404.397
Myo X 8 P1(2020) R2	Myo	2	HStoHY	7	G	HY	Cs	Control	Control	4	3	258.232
Myo X 8 P1(2020) R2	Myo	2	HStoHY	7	G	HY	Cs	Control	Control	4	3	144.37
Myo X 8 P1(2020) R2	Myo	2	HStoHY	7	G	HY	Cs	Control	Control	4	3	240.684
Myo X 8 P1(2020) R2	Myo	2	HStoHY	7	G	HY	Cs	Control	Control	4	3	166.903
Myo X 8 P1(2020) R2	Myo	2	HStoHY	7	G	HY	Cs	Control	Control	4	3	293.527
Myo X 8 P1(2020) R2	Myo	2	HStoHY	7	G	HY	Cs	Control	Control	4	3	280.366
Myo X 8 P1(2020) R2	Myo	2	HStoHY	7	G	HY	Cs	Control	Control	4	3	179.665
Myo X 8 P1(2020) R2	Myo	2	HStoHY	7	G	HY	Cs	Control	Control	4	3	140.781
Myo X 8 P1(2020) R2	Myo	2	HStoHY	7	G	HY	Cs	Control	Control	4	3	268.601
Myo X 8 P1(2020) R2	Myo	2	HStoHY	7	G	HY	Cs	Control	Control	4	3	183.853
Myo X 8 P1(2020) R2	Myo	2	HStoHY	7	G	HY	Cs	Control	Control	4	3	293.726
Myo X 8 P1(2020) R2	Myo	2	HStoHY	7	G	HY	Cs	Control	Control	4	3	475.784
Myo X 8 P1(2020) R2	Myo	2	HStoHY	7	G	HY	Cs	Control	Control	4	3	197.612
Myo X 8 P1(2020) R2	Myo	2	HStoHY	7	G	HY	Cs	Control	Control	4	3	230.714
Myo X 8 P1(2020) R2	Myo	2	HStoHY	7	G	HY	Cs	Control	Control	4	3	246.866
Myo X 8 P1(2020) R2	Myo	2	HStoHY	7	G	HY	Cs	Control	Control	4	3	176.076
Myo X 8 P1(2020) R2	Myo	2	HStoHY	7	G	HY	Cs	Control	Control	4	3	164.71
Myo X 8 P1(2020) R2	Myo	2	HStoHY	7	G	HY	Cs	Control	Control	4	3	124.43
Myo X 8 P1(2020) R2	Myo	2	HStoHY	7	G	HY	Cs	Control	Control	4	3	79.563
Myo X 8 P1(2020) R2	Myo	2	HStoHY	7	G	HY	Cs	Control	Control	4	3	342.78
Myo X 8 P1(2020) R2	Myo	2	HStoHY	7	G	HY	Cs	Control	Control	4	4	744.186
Myo X 8 P1(2020) R2	Myo	2	HStoHY	7	G	HY	Cs	Control	Control	4	4	374.486
Myo X 8 P1(2020) R2	Myo	2	HStoHY	7	G	HY	Cs	Control	Control	4	4	745.781
Myo X 8 P1(2020) R2	Myo	2	HStoHY	7	G	HY	Cs	Control	Control	4	4	337.596
Myo X 8 P1(2020) R2	Myo	2	HStoHY	7	G	HY	Cs	Control	Control	4	4	451.856
Myo X 8 P1(2020) R2	Myo	2	HStoHY	7	G	HY	Cs	Control	Control	4	4	371.694
Myo X 8 P1(2020) R2	Myo	2	HStoHY	7	G	HY	Cs	Control	Control	4	4	451.257
Myo X 8 P1(2020) R2	Myo	2	HStoHY	7	G	HY	Cs	Control	Control	4	4	249.857
Myo X 8 P1(2020) R2	Myo	2	HStoHY	7	G	HY	Cs	Control	Control	4	4	246.666
Myo X 8 P1(2020) R2	Myo	2	HStoHY	7	G	HY	Cs	Control	Control	4	4	379.67
Myo X 8 P1(2020) R2	Myo	2	HStoHY	7	G	HY	Cs	Control	Control	4	4	282.36
Myo X 8 P1(2020) R2	Myo	2	HStoHY	7	G	HY	Cs	Control	Control	4	4	273.187
Myo X 8 P1(2020) R2	Myo	2	HStoHY	7	G	HY	Cs	Control	Control	4	4	325.232
Myo X 8 P1(2020) R2	Myo	2	HStoHY	7	G	HY	Cs	Control	Control	4	4	208.38
Myo X 8 P1(2020) R2	Myo	2	HStoHY	7	G	HY	Cs	Control	Control	4	4	181.46
Myo X 8 P1(2020) R2	Myo	2	HStoHY	7	G	HY	Cs	Control	Control	4	4	204.392
Myo X 8 P1(2020) R2	Myo	2	HStoHY	7	G	HY	Cs	Control	Control	4	4	231.91
Myo X 8 P1(2020) R2	Myo	2	HStoHY	7	G	HY	Cs	Control	Control	4	4	400.01
Myo X 8 P1(2020) R2	Myo	2	HStoHY	7	G	HY	Cs	Control	Control	4	4	362.123
Myo X 8 P1(2020) R2	Myo	2	HStoHY	7	G	HY	Cs	Control	Control	4	4	260.824
Myo X 8 P1(2020) R2	Myo	2	HStoHY	7	G	HY	Cs	Control	Control	4	4	342.182
Myo X 8 P1(2020) R2	Myo	2	HStoHY	7	G	HY	Cs	Control	Control	4	4	220.943
Myo X 8 P1(2020) R2	Myo	2	HStoHY	7	G	HY	Cs	Control	Control	4	4	217.154
Myo X 8 P1(2020) R2	Myo	2	HStoHY	7	G	HY	Cs	Control	Control	4	4	250.056
Myo X 8 P1(2020) R2	Myo	2	HStoHY	7	G	HY	Cs	Control	Control	4	4	435.305
Myo X 8 P1(2020) R2	Myo	2	HStoHY	7	G	HY	Cs	Control	Control	4	4	417.358
Myo X 8 P1(2020) R2	Myo	2	HStoHY	7	G	HY	Cs	Control	Control	4	4	560.931
Myo X 8 P1(2020) R2	Myo	2	HStoHY	7	G	HY	Cs	Control	Control	4	4	240.086
Myo X 8 P1(2020) R2	Myo	2	HStoHY	7	G	HY	Cs	Control	Control	4	4	313.866
Myo X 8 P1(2020) R2	Myo	2	HStoHY	7	G	HY	Cs	Control	Control	4	4	313.866
Myo X 8 P1(2020) R2	Myo	2	HStoHY	7	G	HY	Cs	Control	Control	4	5	460.43
Myo X 8 P1(2020) R2	Myo	2	HStoHY	7	G	HY	Cs	Control	Control	4	5	274.982
Myo X 8 P1(2020) R2	Myo	2	HStoHY	7	G	HY	Cs	Control	Control	4	5	639.497
Myo X 8 P1(2020) R2	Myo	2	HStoHY	7	G	HY	Cs	Control	Control	4	5	432.114
Myo X 8 P1(2020) R2	Myo	2	HStoHY	7	G	HY	Cs	Control	Control	4	5	441.088
Myo X 8 P1(2020) R2	Myo	2	HStoHY	7	G	HY	Cs	Control	Control	4	5	399.412
Myo X 8 P1(2020) R2	Myo	2	HStoHY	7	G	HY	Cs	Control	Control	4	5	248.461
Myo X 8 P1(2020) R2	Myo	2	HStoHY	7	G	HY	Cs	Control	Control	4	5	266.407
Myo X 8 P1(2020) R2	Myo	2	HStoHY	7	G	HY	Cs	Control	Control	4	5	290.137
Myo X 8 P1(2020) R2	Myo	2	HStoHY	7	G	HY	Cs	Control	Control	4	5	276.378
Myo X 8 P1(2020) R2	Myo	2	HStoHY	7	G	HY	Cs	Control	Control	4	5	283.756
Myo X 8 P1(2020) R2	Myo	2	HStoHY	7	G	HY	Cs	Control	Control	4	5	283.158
Myo X 8 P1(2020) R2	Myo	2	HStoHY	7	G	HY	Cs	Control	Control	4	5	308.682
Myo X 8 P1(2020) R2	Myo	2	HStoHY	7	G	HY	Cs	Control	Control	4	5	228.321
Myo X 8 P1(2020) R2	Myo	2	HStoHY	7	G	HY	Cs	Control	Control	4	5	260.625
Myo X 8 P1(2020) R2	Myo	2	HStoHY	7	G	HY	Cs	Control	Control	4	5	501.508
Myo X 8 P1(2020) R2	Myo	2	HStoHY	7	G	HY	Cs	Control	Control	4	5	355.742
Myo X 8 P1(2020) R2	Myo	2	HStoHY	7	G	HY	Cs	Control	Control	4	5	264.413
Myo X 8 P1(2020) R2	Myo	2	HStoHY	7	G	HY	Cs	Control	Control	4	5	314.265
Myo X 8 P1(2020) R2	Myo	2	HStoHY	7	G	HY	Cs	Control	Control	4	5	298.312
Myo X 8 P1(2020) R2	Myo	2	HStoHY	7	G	HY	Cs	Control	Control	4	5	224.931
Myo X 8 P1(2020) R2	Myo	2	HStoHY	7	G	HY	Cs	Control	Control	4	5	263.217
Myo X 8 P1(2020) R2	Myo	2	HStoHY	7	G	HY	Cs	Control	Control	4	5	469.802
Myo X 8 P1(2020) R2	Myo	2	HStoHY	7	G	HY	Cs	Control	Control	4	5	332.61
Myo X 8 P1(2020) R2	Myo	2	HStoHY	7	G	HY	Cs	Control	Control	4	5	250.056
Myo X 8 P1(2020) R2	Myo	2	HStoHY	7	G	HY	Cs	Control	Control	4	5	494.927
Myo X 8 P1(2020) R2	Myo	2	HStoHY	7	G	HY	Cs	Control	Control	4	5	192.029
Myo X 8 P1(2020) R2	Myo	2	HStoHY	7	G	HY	Cs	Control	Control	4	5	218.749
Myo X 8 P1(2020) R2	Myo	2	HStoHY	7	G	HY	Cs	Control	Control	4	5	321.643
Myo X 8 P1(2020) R2	Myo	2	HStoHY	7	G	HY	Cs	Control	Control	4	5	207.981
Myo X 8 P1(2020) R2	Myo	2	HStoHY	7	G	HY	Cs	Control	Control	4	6	679.578
Myo X 8 P1(2020) R2	Myo	2	HStoHY	7	G	HY	Cs	Control	Control	4	6	696.129
Myo X 8 P1(2020) R2	Myo	2	HStoHY	7	G	HY	Cs	Control	Control	4	6	674.194
Myo X 8 P1(2020) R2	Myo	2	HStoHY	7	G	HY	Cs	Control	Control	4	6	779.082
Myo X 8 P1(2020) R2	Myo	2	HStoHY	7	G	HY	Cs	Control	Control	4	6	783.27
Myo X 8 P1(2020) R2	Myo	2	HStoHY	7	G	HY	Cs	Control	Control	4	6	630.325
Myo X 8 P1(2020) R2	Myo	2	HStoHY	7	G	HY	Cs	Control	Control	4	6	232.508
Myo X 8 P1(2020) R2	Myo	2	HStoHY	7	G	HY	Cs	Control	Control	4	6	543.782
Myo X 8 P1(2020) R2	Myo	2	HStoHY	7	G	HY	Cs	Control	Control	4	6	218.35
Myo X 8 P1(2020) R2	Myo	2	HStoHY	7	G	HY	Cs	Control	Control	4	6	264.015
Myo X 8 P1(2020) R2	Myo	2	HStoHY	7	G	HY	Cs	Control	Control	4	6	308.881
Myo X 8 P1(2020) R2	Myo	2	HStoHY	7	G	HY	Cs	Control	Control	4	6	233.306
Myo X 8 P1(2020) R2	Myo	2	HStoHY	7	G	HY	Cs	Control	Control	4	6	239.886
Myo X 8 P1(2020) R2	Myo	2	HStoHY	7	G	HY	Cs	Control	Control	4	6	192.029
Myo X 8 P1(2020) R2	Myo	2	HStoHY	7	G	HY	Cs	Control	Control	4	6	290.934
Myo X 8 P1(2020) R2	Myo	2	HStoHY	7	G	HY	Cs	Control	Control	4	6	420.748
Myo X 8 P1(2020) R2	Myo	2	HStoHY	7	G	HY	Cs	Control	Control	4	6	207.582
Myo X 8 P1(2020) R2	Myo	2	HStoHY	7	G	HY	Cs	Control	Control	4	6	242.479
Myo X 8 P1(2020) R2	Myo	2	HStoHY	7	G	HY	Cs	Control	Control	4	6	417.957
Myo X 8 P1(2020) R2	Myo	2	HStoHY	7	G	HY	Cs	Control	Control	4	6	464.418
Myo X 8 P1(2020) R2	Myo	2	HStoHY	7	G	HY	Cs	Control	Control	4	6	410.578
Myo X 8 P1(2020) R2	Myo	2	HStoHY	7	G	HY	Cs	Control	Control	4	6	499.713
Myo X 8 P1(2020) R2	Myo	2	HStoHY	7	G	HY	Cs	Control	Control	4	6	400.01
Myo X 8 P1(2020) R2	Myo	2	HStoHY	7	G	HY	Cs	Control	Control	4	6	244.273
Myo X 8 P1(2020) R2	Myo	2	HStoHY	7	G	HY	Cs	Control	Control	4	6	491.139
Myo X 8 P1(2020) R2	Myo	2	HStoHY	7	G	HY	Cs	Control	Control	4	6	240.883
Myo X 8 P1(2020) R2	Myo	2	HStoHY	7	G	HY	Cs	Control	Control	4	6	316.658
Myo X 8 P1(2020) R2	Myo	2	HStoHY	7	G	HY	Cs	Control	Control	4	6	289.738
Myo X 8 P1(2020) R2	Myo	2	HStoHY	7	G	HY	Cs	Control	Control	4	6	333.009
Myo X 8 P1(2020) R2	Myo	2	HStoHY	7	G	HY	Cs	Control	Control	4	6	250.455
Myo X 8 P1(2020) R2	Myo	2	HStoHY	7	G	HY	Cs	Control	Control	4	6	451.058
Myo X 1 P1(2020) R1	Myo	1	HS	0	G	HS	Cs	Control	Control	4	1	125.626
Myo X 1 P1(2020) R1	Myo	1	HS	0	G	HS	Cs	Control	Control	4	1	142.975
Myo X 1 P1(2020) R1	Myo	1	HS	0	G	HS	Cs	Control	Control	4	1	122.436
Myo X 1 P1(2020) R1	Myo	1	HS	0	G	HS	Cs	Control	Control	4	1	168.499
Myo X 1 P1(2020) R1	Myo	1	HS	0	G	HS	Cs	Control	Control	4	1	101.099
Myo X 1 P1(2020) R1	Myo	1	HS	0	G	HS	Cs	Control	Control	4	1	174.281
Myo X 1 P1(2020) R1	Myo	1	HS	0	G	HS	Cs	Control	Control	4	1	149.156
Myo X 1 P1(2020) R1	Myo	1	HS	0	G	HS	Cs	Control	Control	4	1	125.826
Myo X 1 P1(2020) R1	Myo	1	HS	0	G	HS	Cs	Control	Control	4	1	67.599
Myo X 1 P1(2020) R1	Myo	1	HS	0	G	HS	Cs	Control	Control	4	1	45.864
Myo X 1 P1(2020) R1	Myo	1	HS	0	G	HS	Cs	Control	Control	4	1	81.557
Myo X 1 P1(2020) R1	Myo	1	HS	0	G	HS	Cs	Control	Control	4	1	53.042
Myo X 1 P1(2020) R1	Myo	1	HS	0	G	HS	Cs	Control	Control	4	1	92.724
Myo X 1 P1(2020) R1	Myo	1	HS	0	G	HS	Cs	Control	Control	4	1	62.015
Myo X 1 P1(2020) R1	Myo	1	HS	0	G	HS	Cs	Control	Control	4	1	63.81
Myo X 1 P1(2020) R1	Myo	1	HS	0	G	HS	Cs	Control	Control	4	1	63.81
Myo X 1 P1(2020) R1	Myo	1	HS	0	G	HS	Cs	Control	Control	4	1	84.15
Myo X 1 P1(2020) R1	Myo	1	HS	0	G	HS	Cs	Control	Control	4	1	121.239
Myo X 1 P1(2020) R1	Myo	1	HS	0	G	HS	Cs	Control	Control	4	1	115.257
Myo X 1 P1(2020) R1	Myo	1	HS	0	G	HS	Cs	Control	Control	4	1	106.483
Myo X 1 P1(2020) R1	Myo	1	HS	0	G	HS	Cs	Control	Control	4	1	136.594
Myo X 1 P1(2020) R1	Myo	1	HS	0	G	HS	Cs	Control	Control	4	1	86.343
Myo X 1 P1(2020) R1	Myo	1	HS	0	G	HS	Cs	Control	Control	4	1	97.51
Myo X 1 P1(2020) R1	Myo	1	HS	0	G	HS	Cs	Control	Control	4	1	117.451
Myo X 1 P1(2020) R1	Myo	1	HS	0	G	HS	Cs	Control	Control	4	1	152.945
Myo X 1 P1(2020) R1	Myo	1	HS	0	G	HS	Cs	Control	Control	4	1	122.635
Myo X 1 P1(2020) R1	Myo	1	HS	0	G	HS	Cs	Control	Control	4	1	178.469
Myo X 1 P1(2020) R1	Myo	1	HS	0	G	HS	Cs	Control	Control	4	1	111.668
Myo X 1 P1(2020) R1	Myo	1	HS	0	G	HS	Cs	Control	Control	4	1	133.403
Myo X 1 P1(2020) R1	Myo	1	HS	0	G	HS	Cs	Control	Control	4	1	125.028
Myo X 1 P1(2020) R1	Myo	1	HS	0	G	HS	Cs	Control	Control	4	2	84.349
Myo X 1 P1(2020) R1	Myo	1	HS	0	G	HS	Cs	Control	Control	4	2	100.302
Myo X 1 P1(2020) R1	Myo	1	HS	0	G	HS	Cs	Control	Control	4	2	141.778
Myo X 1 P1(2020) R1	Myo	1	HS	0	G	HS	Cs	Control	Control	4	2	147.362
Myo X 1 P1(2020) R1	Myo	1	HS	0	G	HS	Cs	Control	Control	4	2	112.465
Myo X 1 P1(2020) R1	Myo	1	HS	0	G	HS	Cs	Control	Control	4	2	120.442
Myo X 1 P1(2020) R1	Myo	1	HS	0	G	HS	Cs	Control	Control	4	2	168.299
Myo X 1 P1(2020) R1	Myo	1	HS	0	G	HS	Cs	Control	Control	4	2	114.061
Myo X 1 P1(2020) R1	Myo	1	HS	0	G	HS	Cs	Control	Control	4	2	123.632
Myo X 1 P1(2020) R1	Myo	1	HS	0	G	HS	Cs	Control	Control	4	2	130.412
Myo X 1 P1(2020) R1	Myo	1	HS	0	G	HS	Cs	Control	Control	4	2	117.451
Myo X 1 P1(2020) R1	Myo	1	HS	0	G	HS	Cs	Control	Control	4	2	126.623
Myo X 1 P1(2020) R1	Myo	1	HS	0	G	HS	Cs	Control	Control	4	2	134.4
Myo X 1 P1(2020) R1	Myo	1	HS	0	G	HS	Cs	Control	Control	4	2	95.715
Myo X 1 P1(2020) R1	Myo	1	HS	0	G	HS	Cs	Control	Control	4	2	80.56
Myo X 1 P1(2020) R1	Myo	1	HS	0	G	HS	Cs	Control	Control	4	2	117.251
Myo X 1 P1(2020) R1	Myo	1	HS	0	G	HS	Cs	Control	Control	4	2	89.334
Myo X 1 P1(2020) R1	Myo	1	HS	0	G	HS	Cs	Control	Control	4	2	137.79
Myo X 1 P1(2020) R1	Myo	1	HS	0	G	HS	Cs	Control	Control	4	2	83.352
Myo X 1 P1(2020) R1	Myo	1	HS	0	G	HS	Cs	Control	Control	4	2	95.316
Myo X 1 P1(2020) R1	Myo	1	HS	0	G	HS	Cs	Control	Control	4	2	72.385
Myo X 1 P1(2020) R1	Myo	1	HS	0	G	HS	Cs	Control	Control	4	2	159.725
Myo X 1 P1(2020) R1	Myo	1	HS	0	G	HS	Cs	Control	Control	4	2	109.474
Myo X 1 P1(2020) R1	Myo	1	HS	0	G	HS	Cs	Control	Control	4	2	113.861
Myo X 1 P1(2020) R1	Myo	1	HS	0	G	HS	Cs	Control	Control	4	2	169.097
Myo X 1 P1(2020) R1	Myo	1	HS	0	G	HS	Cs	Control	Control	4	2	102.894
Myo X 1 P1(2020) R1	Myo	1	HS	0	G	HS	Cs	Control	Control	4	2	124.629
Myo X 1 P1(2020) R1	Myo	1	HS	0	G	HS	Cs	Control	Control	4	2	67.998
Myo X 1 P1(2020) R1	Myo	1	HS	0	G	HS	Cs	Control	Control	4	2	138.986
Myo X 1 P1(2020) R1	Myo	1	HS	0	G	HS	Cs	Control	Control	4	2	120.043
Myo X 1 P1(2020) R1	Myo	1	HS	0	G	HS	Cs	Control	Control	4	3	253.845
Myo X 1 P1(2020) R1	Myo	1	HS	0	G	HS	Cs	Control	Control	4	3	315.86
Myo X 1 P1(2020) R1	Myo	1	HS	0	G	HS	Cs	Control	Control	4	3	229.318
Myo X 1 P1(2020) R1	Myo	1	HS	0	G	HS	Cs	Control	Control	4	3	149.754
Myo X 1 P1(2020) R1	Myo	1	HS	0	G	HS	Cs	Control	Control	4	3	147.561
Myo X 1 P1(2020) R1	Myo	1	HS	0	G	HS	Cs	Control	Control	4	3	162.516
Myo X 1 P1(2020) R1	Myo	1	HS	0	G	HS	Cs	Control	Control	4	3	198.41
Myo X 1 P1(2020) R1	Myo	1	HS	0	G	HS	Cs	Control	Control	4	3	188.838
Myo X 1 P1(2020) R1	Myo	1	HS	0	G	HS	Cs	Control	Control	4	3	202.996
Myo X 1 P1(2020) R1	Myo	1	HS	0	G	HS	Cs	Control	Control	4	3	254.642
Myo X 1 P1(2020) R1	Myo	1	HS	0	G	HS	Cs	Control	Control	4	3	213.963
Myo X 1 P1(2020) R1	Myo	1	HS	0	G	HS	Cs	Control	Control	4	3	132.406
Myo X 1 P1(2020) R1	Myo	1	HS	0	G	HS	Cs	Control	Control	4	3	242.479
Myo X 1 P1(2020) R1	Myo	1	HS	0	G	HS	Cs	Control	Control	4	3	325.831
Myo X 1 P1(2020) R1	Myo	1	HS	0	G	HS	Cs	Control	Control	4	3	236.297
Myo X 1 P1(2020) R1	Myo	1	HS	0	G	HS	Cs	Control	Control	4	3	135.198
Myo X 1 P1(2020) R1	Myo	1	HS	0	G	HS	Cs	Control	Control	4	3	182.856
Myo X 1 P1(2020) R1	Myo	1	HS	0	G	HS	Cs	Control	Control	4	3	124.43
Myo X 1 P1(2020) R1	Myo	1	HS	0	G	HS	Cs	Control	Control	4	3	135.995
Myo X 1 P1(2020) R1	Myo	1	HS	0	G	HS	Cs	Control	Control	4	3	151.749
Myo X 1 P1(2020) R1	Myo	1	HS	0	G	HS	Cs	Control	Control	4	3	159.725
Myo X 1 P1(2020) R1	Myo	1	HS	0	G	HS	Cs	Control	Control	4	3	225.33
Myo X 1 P1(2020) R1	Myo	1	HS	0	G	HS	Cs	Control	Control	4	3	167.9
Myo X 1 P1(2020) R1	Myo	1	HS	0	G	HS	Cs	Control	Control	4	3	238.092
Myo X 1 P1(2020) R1	Myo	1	HS	0	G	HS	Cs	Control	Control	4	3	174.281
Myo X 1 P1(2020) R1	Myo	1	HS	0	G	HS	Cs	Control	Control	4	3	162.317
Myo X 1 P1(2020) R1	Myo	1	HS	0	G	HS	Cs	Control	Control	4	3	121.439
Myo X 1 P1(2020) R1	Myo	1	HS	0	G	HS	Cs	Control	Control	4	3	182.258
Myo X 1 P1(2020) R1	Myo	1	HS	0	G	HS	Cs	Control	Control	4	3	159.326
Myo X 1 P1(2020) R1	Myo	1	HS	0	G	HS	Cs	Control	Control	4	3	186.445
Myo X 1 P1(2020) R1	Myo	1	HS	0	G	HS	Cs	Control	Control	4	4	218.151
Myo X 1 P1(2020) R1	Myo	1	HS	0	G	HS	Cs	Control	Control	4	4	161.719
Myo X 1 P1(2020) R1	Myo	1	HS	0	G	HS	Cs	Control	Control	4	4	168.698
Myo X 1 P1(2020) R1	Myo	1	HS	0	G	HS	Cs	Control	Control	4	4	195.02
Myo X 1 P1(2020) R1	Myo	1	HS	0	G	HS	Cs	Control	Control	4	4	124.629
Myo X 1 P1(2020) R1	Myo	1	HS	0	G	HS	Cs	Control	Control	4	4	185.448
Myo X 1 P1(2020) R1	Myo	1	HS	0	G	HS	Cs	Control	Control	4	4	215.359
Myo X 1 P1(2020) R1	Myo	1	HS	0	G	HS	Cs	Control	Control	4	4	205.987
Myo X 1 P1(2020) R1	Myo	1	HS	0	G	HS	Cs	Control	Control	4	4	113.064
Myo X 1 P1(2020) R1	Myo	1	HS	0	G	HS	Cs	Control	Control	4	4	113.263
Myo X 1 P1(2020) R1	Myo	1	HS	0	G	HS	Cs	Control	Control	4	4	127.82
Myo X 1 P1(2020) R1	Myo	1	HS	0	G	HS	Cs	Control	Control	4	4	202.797
Myo X 1 P1(2020) R1	Myo	1	HS	0	G	HS	Cs	Control	Control	4	4	152.746
Myo X 1 P1(2020) R1	Myo	1	HS	0	G	HS	Cs	Control	Control	4	4	242.08
Myo X 1 P1(2020) R1	Myo	1	HS	0	G	HS	Cs	Control	Control	4	4	226.526
Myo X 1 P1(2020) R1	Myo	1	HS	0	G	HS	Cs	Control	Control	4	4	110.87
Myo X 1 P1(2020) R1	Myo	1	HS	0	G	HS	Cs	Control	Control	4	4	156.734
Myo X 1 P1(2020) R1	Myo	1	HS	0	G	HS	Cs	Control	Control	4	4	126.224
Myo X 1 P1(2020) R1	Myo	1	HS	0	G	HS	Cs	Control	Control	4	4	109.075
Myo X 1 P1(2020) R1	Myo	1	HS	0	G	HS	Cs	Control	Control	4	4	155.338
Myo X 1 P1(2020) R1	Myo	1	HS	0	G	HS	Cs	Control	Control	4	4	93.921
Myo X 1 P1(2020) R1	Myo	1	HS	0	G	HS	Cs	Control	Control	4	4	232.309
Myo X 1 P1(2020) R1	Myo	1	HS	0	G	HS	Cs	Control	Control	4	4	72.584
Myo X 1 P1(2020) R1	Myo	1	HS	0	G	HS	Cs	Control	Control	4	4	242.08
Myo X 1 P1(2020) R1	Myo	1	HS	0	G	HS	Cs	Control	Control	4	4	246.666
Myo X 1 P1(2020) R1	Myo	1	HS	0	G	HS	Cs	Control	Control	4	4	176.076
Myo X 1 P1(2020) R1	Myo	1	HS	0	G	HS	Cs	Control	Control	4	4	120.442
Myo X 1 P1(2020) R1	Myo	1	HS	0	G	HS	Cs	Control	Control	4	4	176.276
Myo X 1 P1(2020) R1	Myo	1	HS	0	G	HS	Cs	Control	Control	4	4	126.623
Myo X 1 P1(2020) R1	Myo	1	HS	0	G	HS	Cs	Control	Control	4	4	141.379
Myo X 1 P1(2020) R1	Myo	1	HS	0	G	HS	Cs	Control	Control	4	5	145.168
Myo X 1 P1(2020) R1	Myo	1	HS	0	G	HS	Cs	Control	Control	4	5	124.629
Myo X 1 P1(2020) R1	Myo	1	HS	0	G	HS	Cs	Control	Control	4	5	114.459
Myo X 1 P1(2020) R1	Myo	1	HS	0	G	HS	Cs	Control	Control	4	5	149.754
Myo X 1 P1(2020) R1	Myo	1	HS	0	G	HS	Cs	Control	Control	4	5	132.406
Myo X 1 P1(2020) R1	Myo	1	HS	0	G	HS	Cs	Control	Control	4	5	124.031
Myo X 1 P1(2020) R1	Myo	1	HS	0	G	HS	Cs	Control	Control	4	5	127.62
Myo X 1 P1(2020) R1	Myo	1	HS	0	G	HS	Cs	Control	Control	4	5	118.248
Myo X 1 P1(2020) R1	Myo	1	HS	0	G	HS	Cs	Control	Control	4	5	114.26
Myo X 1 P1(2020) R1	Myo	1	HS	0	G	HS	Cs	Control	Control	4	5	109.075
Myo X 1 P1(2020) R1	Myo	1	HS	0	G	HS	Cs	Control	Control	4	5	102.296
Myo X 1 P1(2020) R1	Myo	1	HS	0	G	HS	Cs	Control	Control	4	5	146.165
Myo X 1 P1(2020) R1	Myo	1	HS	0	G	HS	Cs	Control	Control	4	5	128.817
Myo X 1 P1(2020) R1	Myo	1	HS	0	G	HS	Cs	Control	Control	4	5	98.108
Myo X 1 P1(2020) R1	Myo	1	HS	0	G	HS	Cs	Control	Control	4	5	131.608
Myo X 1 P1(2020) R1	Myo	1	HS	0	G	HS	Cs	Control	Control	4	5	129.016
Myo X 1 P1(2020) R1	Myo	1	HS	0	G	HS	Cs	Control	Control	4	5	133.403
Myo X 1 P1(2020) R1	Myo	1	HS	0	G	HS	Cs	Control	Control	4	5	163.314
Myo X 1 P1(2020) R1	Myo	1	HS	0	G	HS	Cs	Control	Control	4	5	165.906
Myo X 1 P1(2020) R1	Myo	1	HS	0	G	HS	Cs	Control	Control	4	5	63.411
Myo X 1 P1(2020) R1	Myo	1	HS	0	G	HS	Cs	Control	Control	4	5	81.757
Myo X 1 P1(2020) R1	Myo	1	HS	0	G	HS	Cs	Control	Control	4	5	95.715
Myo X 1 P1(2020) R1	Myo	1	HS	0	G	HS	Cs	Control	Control	4	5	62.813
Myo X 1 P1(2020) R1	Myo	1	HS	0	G	HS	Cs	Control	Control	4	5	70.789
Myo X 1 P1(2020) R1	Myo	1	HS	0	G	HS	Cs	Control	Control	4	5	64.608
Myo X 1 P1(2020) R1	Myo	1	HS	0	G	HS	Cs	Control	Control	4	5	69.394
Myo X 1 P1(2020) R1	Myo	1	HS	0	G	HS	Cs	Control	Control	4	5	77.769
Myo X 1 P1(2020) R1	Myo	1	HS	0	G	HS	Cs	Control	Control	4	5	73.182
Myo X 1 P1(2020) R1	Myo	1	HS	0	G	HS	Cs	Control	Control	4	5	42.474
Myo X 1 P1(2020) R1	Myo	1	HS	0	G	HS	Cs	Control	Control	4	5	52.843
Myo X 1 P1(2020) R1	Myo	1	HS	0	G	HS	Cs	Control	Control	4	6	68.596
Myo X 1 P1(2020) R1	Myo	1	HS	0	G	HS	Cs	Control	Control	4	6	49.253
Myo X 1 P1(2020) R1	Myo	1	HS	0	G	HS	Cs	Control	Control	4	6	77.569
Myo X 1 P1(2020) R1	Myo	1	HS	0	G	HS	Cs	Control	Control	4	6	61.617
Myo X 1 P1(2020) R1	Myo	1	HS	0	G	HS	Cs	Control	Control	4	6	45.066
Myo X 1 P1(2020) R1	Myo	1	HS	0	G	HS	Cs	Control	Control	4	6	83.352
Myo X 1 P1(2020) R1	Myo	1	HS	0	G	HS	Cs	Control	Control	4	6	80.959
Myo X 1 P1(2020) R1	Myo	1	HS	0	G	HS	Cs	Control	Control	4	6	65.007
Myo X 1 P1(2020) R1	Myo	1	HS	0	G	HS	Cs	Control	Control	4	6	56.033
Myo X 1 P1(2020) R1	Myo	1	HS	0	G	HS	Cs	Control	Control	4	6	62.215
Myo X 1 P1(2020) R1	Myo	1	HS	0	G	HS	Cs	Control	Control	4	6	104.29
Myo X 1 P1(2020) R1	Myo	1	HS	0	G	HS	Cs	Control	Control	4	6	55.634
Myo X 1 P1(2020) R1	Myo	1	HS	0	G	HS	Cs	Control	Control	4	6	73.98
Myo X 1 P1(2020) R1	Myo	1	HS	0	G	HS	Cs	Control	Control	4	6	86.144
Myo X 1 P1(2020) R1	Myo	1	HS	0	G	HS	Cs	Control	Control	4	6	58.027
Myo X 1 P1(2020) R1	Myo	1	HS	0	G	HS	Cs	Control	Control	4	6	51.846
Myo X 1 P1(2020) R1	Myo	1	HS	0	G	HS	Cs	Control	Control	4	6	51.646
Myo X 1 P1(2020) R1	Myo	1	HS	0	G	HS	Cs	Control	Control	4	6	108.078
Myo X 1 P1(2020) R1	Myo	1	HS	0	G	HS	Cs	Control	Control	4	6	45.265
Myo X 1 P1(2020) R1	Myo	1	HS	0	G	HS	Cs	Control	Control	4	6	35.295
Myo X 1 P1(2020) R1	Myo	1	HS	0	G	HS	Cs	Control	Control	4	6	93.721
Myo X 1 P1(2020) R1	Myo	1	HS	0	G	HS	Cs	Control	Control	4	6	41.676
Myo X 1 P1(2020) R1	Myo	1	HS	0	G	HS	Cs	Control	Control	4	6	95.715
Myo X 3 P1(2020) R1	Myo	1	HS	0	G	HS	34639	Tor-IR	Tor	4	1	49.253
Myo X 3 P1(2020) R1	Myo	1	HS	0	G	HS	34639	Tor-IR	Tor	4	1	74.778
Myo X 3 P1(2020) R1	Myo	1	HS	0	G	HS	34639	Tor-IR	Tor	4	1	54.239
Myo X 3 P1(2020) R1	Myo	1	HS	0	G	HS	34639	Tor-IR	Tor	4	1	52.643
Myo X 3 P1(2020) R1	Myo	1	HS	0	G	HS	34639	Tor-IR	Tor	4	1	98.308
Myo X 3 P1(2020) R1	Myo	1	HS	0	G	HS	34639	Tor-IR	Tor	4	1	85.346
Myo X 3 P1(2020) R1	Myo	1	HS	0	G	HS	34639	Tor-IR	Tor	4	1	44.268
Myo X 3 P1(2020) R1	Myo	1	HS	0	G	HS	34639	Tor-IR	Tor	4	1	63.411
Myo X 3 P1(2020) R1	Myo	1	HS	0	G	HS	34639	Tor-IR	Tor	4	1	88.736
Myo X 3 P1(2020) R1	Myo	1	HS	0	G	HS	34639	Tor-IR	Tor	4	1	61.417
Myo X 3 P1(2020) R1	Myo	1	HS	0	G	HS	34639	Tor-IR	Tor	4	1	64.01
Myo X 3 P1(2020) R1	Myo	1	HS	0	G	HS	34639	Tor-IR	Tor	4	1	61.417
Myo X 3 P1(2020) R1	Myo	1	HS	0	G	HS	34639	Tor-IR	Tor	4	1	57.23
Myo X 3 P1(2020) R1	Myo	1	HS	0	G	HS	34639	Tor-IR	Tor	4	1	33.7
Myo X 3 P1(2020) R1	Myo	1	HS	0	G	HS	34639	Tor-IR	Tor	4	1	70.391
Myo X 3 P1(2020) R1	Myo	1	HS	0	G	HS	34639	Tor-IR	Tor	4	1	62.215
Myo X 3 P1(2020) R1	Myo	1	HS	0	G	HS	34639	Tor-IR	Tor	4	1	75.376
Myo X 3 P1(2020) R1	Myo	1	HS	0	G	HS	34639	Tor-IR	Tor	4	1	111.867
Myo X 3 P1(2020) R1	Myo	1	HS	0	G	HS	34639	Tor-IR	Tor	4	1	88.337
Myo X 3 P1(2020) R1	Myo	1	HS	0	G	HS	34639	Tor-IR	Tor	4	1	83.751
Myo X 3 P1(2020) R1	Myo	1	HS	0	G	HS	34639	Tor-IR	Tor	4	1	89.534
Myo X 3 P1(2020) R1	Myo	1	HS	0	G	HS	34639	Tor-IR	Tor	4	1	70.789
Myo X 3 P1(2020) R1	Myo	1	HS	0	G	HS	34639	Tor-IR	Tor	4	1	65.605
Myo X 3 P1(2020) R1	Myo	1	HS	0	G	HS	34639	Tor-IR	Tor	4	1	49.253
Myo X 3 P1(2020) R1	Myo	1	HS	0	G	HS	34639	Tor-IR	Tor	4	1	82.355
Myo X 3 P1(2020) R1	Myo	1	HS	0	G	HS	34639	Tor-IR	Tor	4	1	88.935
Myo X 3 P1(2020) R1	Myo	1	HS	0	G	HS	34639	Tor-IR	Tor	4	1	50.25
Myo X 3 P1(2020) R1	Myo	1	HS	0	G	HS	34639	Tor-IR	Tor	4	1	32.703
Myo X 3 P1(2020) R1	Myo	1	HS	0	G	HS	34639	Tor-IR	Tor	4	1	29.911
Myo X 3 P1(2020) R1	Myo	1	HS	0	G	HS	34639	Tor-IR	Tor	4	1	74.379
Myo X 3 P1(2020) R1	Myo	1	HS	0	G	HS	34639	Tor-IR	Tor	4	2	116.055
Myo X 3 P1(2020) R1	Myo	1	HS	0	G	HS	34639	Tor-IR	Tor	4	2	112.665
Myo X 3 P1(2020) R1	Myo	1	HS	0	G	HS	34639	Tor-IR	Tor	4	2	85.346
Myo X 3 P1(2020) R1	Myo	1	HS	0	G	HS	34639	Tor-IR	Tor	4	2	119.445
Myo X 3 P1(2020) R1	Myo	1	HS	0	G	HS	34639	Tor-IR	Tor	4	2	108.278
Myo X 3 P1(2020) R1	Myo	1	HS	0	G	HS	34639	Tor-IR	Tor	4	2	108.278
Myo X 3 P1(2020) R1	Myo	1	HS	0	G	HS	34639	Tor-IR	Tor	4	2	79.763
Myo X 3 P1(2020) R1	Myo	1	HS	0	G	HS	34639	Tor-IR	Tor	4	2	76.572
Myo X 3 P1(2020) R1	Myo	1	HS	0	G	HS	34639	Tor-IR	Tor	4	2	115.058
Myo X 3 P1(2020) R1	Myo	1	HS	0	G	HS	34639	Tor-IR	Tor	4	2	98.108
Myo X 3 P1(2020) R1	Myo	1	HS	0	G	HS	34639	Tor-IR	Tor	4	2	101.897
Myo X 3 P1(2020) R1	Myo	1	HS	0	G	HS	34639	Tor-IR	Tor	4	2	93.123
Myo X 3 P1(2020) R1	Myo	1	HS	0	G	HS	34639	Tor-IR	Tor	4	2	107.081
Myo X 3 P1(2020) R1	Myo	1	HS	0	G	HS	34639	Tor-IR	Tor	4	2	144.769
Myo X 3 P1(2020) R1	Myo	1	HS	0	G	HS	34639	Tor-IR	Tor	4	2	132.207
Myo X 3 P1(2020) R1	Myo	1	HS	0	G	HS	34639	Tor-IR	Tor	4	2	162.915
Myo X 3 P1(2020) R1	Myo	1	HS	0	G	HS	34639	Tor-IR	Tor	4	2	135.796
Myo X 3 P1(2020) R1	Myo	1	HS	0	G	HS	34639	Tor-IR	Tor	4	2	107.281
Myo X 3 P1(2020) R1	Myo	1	HS	0	G	HS	34639	Tor-IR	Tor	4	2	89.932
Myo X 3 P1(2020) R1	Myo	1	HS	0	G	HS	34639	Tor-IR	Tor	4	2	93.522
Myo X 3 P1(2020) R1	Myo	1	HS	0	G	HS	34639	Tor-IR	Tor	4	2	73.581
Myo X 3 P1(2020) R1	Myo	1	HS	0	G	HS	34639	Tor-IR	Tor	4	2	84.748
Myo X 3 P1(2020) R1	Myo	1	HS	0	G	HS	34639	Tor-IR	Tor	4	2	79.563
Myo X 3 P1(2020) R1	Myo	1	HS	0	G	HS	34639	Tor-IR	Tor	4	2	131.608
Myo X 3 P1(2020) R1	Myo	1	HS	0	G	HS	34639	Tor-IR	Tor	4	2	79.763
Myo X 3 P1(2020) R1	Myo	1	HS	0	G	HS	34639	Tor-IR	Tor	4	2	87.34
Myo X 3 P1(2020) R1	Myo	1	HS	0	G	HS	34639	Tor-IR	Tor	4	2	103.891
Myo X 3 P1(2020) R1	Myo	1	HS	0	G	HS	34639	Tor-IR	Tor	4	2	70.989
Myo X 3 P1(2020) R1	Myo	1	HS	0	G	HS	34639	Tor-IR	Tor	4	2	105.287
Myo X 3 P1(2020) R1	Myo	1	HS	0	G	HS	34639	Tor-IR	Tor	4	2	77.37
Myo X 3 P1(2020) R1	Myo	1	HS	0	G	HS	34639	Tor-IR	Tor	4	3	134.998
Myo X 3 P1(2020) R1	Myo	1	HS	0	G	HS	34639	Tor-IR	Tor	4	3	156.135
Myo X 3 P1(2020) R1	Myo	1	HS	0	G	HS	34639	Tor-IR	Tor	4	3	117.052
Myo X 3 P1(2020) R1	Myo	1	HS	0	G	HS	34639	Tor-IR	Tor	4	3	116.852
Myo X 3 P1(2020) R1	Myo	1	HS	0	G	HS	34639	Tor-IR	Tor	4	3	114.26
Myo X 3 P1(2020) R1	Myo	1	HS	0	G	HS	34639	Tor-IR	Tor	4	3	122.835
Myo X 3 P1(2020) R1	Myo	1	HS	0	G	HS	34639	Tor-IR	Tor	4	3	120.442
Myo X 3 P1(2020) R1	Myo	1	HS	0	G	HS	34639	Tor-IR	Tor	4	3	96.114
Myo X 3 P1(2020) R1	Myo	1	HS	0	G	HS	34639	Tor-IR	Tor	4	3	95.117
Myo X 3 P1(2020) R1	Myo	1	HS	0	G	HS	34639	Tor-IR	Tor	4	3	205.19
Myo X 3 P1(2020) R1	Myo	1	HS	0	G	HS	34639	Tor-IR	Tor	4	3	125.826
Myo X 3 P1(2020) R1	Myo	1	HS	0	G	HS	34639	Tor-IR	Tor	4	3	121.04
Myo X 3 P1(2020) R1	Myo	1	HS	0	G	HS	34639	Tor-IR	Tor	4	3	106.882
Myo X 3 P1(2020) R1	Myo	1	HS	0	G	HS	34639	Tor-IR	Tor	4	3	122.835
Myo X 3 P1(2020) R1	Myo	1	HS	0	G	HS	34639	Tor-IR	Tor	4	3	97.51
Myo X 3 P1(2020) R1	Myo	1	HS	0	G	HS	34639	Tor-IR	Tor	4	3	75.974
Myo X 3 P1(2020) R1	Myo	1	HS	0	G	HS	34639	Tor-IR	Tor	4	3	80.162
Myo X 3 P1(2020) R1	Myo	1	HS	0	G	HS	34639	Tor-IR	Tor	4	3	74.179
Myo X 3 P1(2020) R1	Myo	1	HS	0	G	HS	34639	Tor-IR	Tor	4	3	77.37
Myo X 3 P1(2020) R1	Myo	1	HS	0	G	HS	34639	Tor-IR	Tor	4	3	90.929
Myo X 3 P1(2020) R1	Myo	1	HS	0	G	HS	34639	Tor-IR	Tor	4	3	102.694
Myo X 3 P1(2020) R1	Myo	1	HS	0	G	HS	34639	Tor-IR	Tor	4	3	105.885
Myo X 3 P1(2020) R1	Myo	1	HS	0	G	HS	34639	Tor-IR	Tor	4	3	100.9
Myo X 3 P1(2020) R1	Myo	1	HS	0	G	HS	34639	Tor-IR	Tor	4	3	73.98
Myo X 3 P1(2020) R1	Myo	1	HS	0	G	HS	34639	Tor-IR	Tor	4	3	79.563
Myo X 3 P1(2020) R1	Myo	1	HS	0	G	HS	34639	Tor-IR	Tor	4	3	115.257
Myo X 3 P1(2020) R1	Myo	1	HS	0	G	HS	34639	Tor-IR	Tor	4	3	104.489
Myo X 3 P1(2020) R1	Myo	1	HS	0	G	HS	34639	Tor-IR	Tor	4	3	69.394
Myo X 3 P1(2020) R1	Myo	1	HS	0	G	HS	34639	Tor-IR	Tor	4	3	125.028
Myo X 3 P1(2020) R1	Myo	1	HS	0	G	HS	34639	Tor-IR	Tor	4	3	103.691
Myo X 3 P1(2020) R1	Myo	1	HS	0	G	HS	34639	Tor-IR	Tor	4	4	57.629
Myo X 3 P1(2020) R1	Myo	1	HS	0	G	HS	34639	Tor-IR	Tor	4	4	93.522
Myo X 3 P1(2020) R1	Myo	1	HS	0	G	HS	34639	Tor-IR	Tor	4	4	25.524
Myo X 3 P1(2020) R1	Myo	1	HS	0	G	HS	34639	Tor-IR	Tor	4	4	111.269
Myo X 3 P1(2020) R1	Myo	1	HS	0	G	HS	34639	Tor-IR	Tor	4	4	125.626
Myo X 3 P1(2020) R1	Myo	1	HS	0	G	HS	34639	Tor-IR	Tor	4	4	102.694
Myo X 3 P1(2020) R1	Myo	1	HS	0	G	HS	34639	Tor-IR	Tor	4	4	54.239
Myo X 3 P1(2020) R1	Myo	1	HS	0	G	HS	34639	Tor-IR	Tor	4	4	79.962
Myo X 3 P1(2020) R1	Myo	1	HS	0	G	HS	34639	Tor-IR	Tor	4	4	100.302
Myo X 3 P1(2020) R1	Myo	1	HS	0	G	HS	34639	Tor-IR	Tor	4	4	119.843
Myo X 3 P1(2020) R1	Myo	1	HS	0	G	HS	34639	Tor-IR	Tor	4	4	105.287
Myo X 3 P1(2020) R1	Myo	1	HS	0	G	HS	34639	Tor-IR	Tor	4	4	179.267
Myo X 3 P1(2020) R1	Myo	1	HS	0	G	HS	34639	Tor-IR	Tor	4	4	119.245
Myo X 3 P1(2020) R1	Myo	1	HS	0	G	HS	34639	Tor-IR	Tor	4	4	81.159
Myo X 3 P1(2020) R1	Myo	1	HS	0	G	HS	34639	Tor-IR	Tor	4	4	138.986
Myo X 3 P1(2020) R1	Myo	1	HS	0	G	HS	34639	Tor-IR	Tor	4	4	133.004
Myo X 3 P1(2020) R1	Myo	1	HS	0	G	HS	34639	Tor-IR	Tor	4	4	74.977
Myo X 3 P1(2020) R1	Myo	1	HS	0	G	HS	34639	Tor-IR	Tor	4	4	111.867
Myo X 3 P1(2020) R1	Myo	1	HS	0	G	HS	34639	Tor-IR	Tor	4	4	145.567
Myo X 3 P1(2020) R1	Myo	1	HS	0	G	HS	34639	Tor-IR	Tor	4	4	221.541
Myo X 3 P1(2020) R1	Myo	1	HS	0	G	HS	34639	Tor-IR	Tor	4	4	158.927
Myo X 3 P1(2020) R1	Myo	1	HS	0	G	HS	34639	Tor-IR	Tor	4	4	160.522
Myo X 3 P1(2020) R1	Myo	1	HS	0	G	HS	34639	Tor-IR	Tor	4	4	85.745
Myo X 3 P1(2020) R1	Myo	1	HS	0	G	HS	34639	Tor-IR	Tor	4	4	53.441
Myo X 3 P1(2020) R1	Myo	1	HS	0	G	HS	34639	Tor-IR	Tor	4	4	61.617
Myo X 3 P1(2020) R1	Myo	1	HS	0	G	HS	34639	Tor-IR	Tor	4	4	106.084
Myo X 3 P1(2020) R1	Myo	1	HS	0	G	HS	34639	Tor-IR	Tor	4	4	104.489
Myo X 3 P1(2020) R1	Myo	1	HS	0	G	HS	34639	Tor-IR	Tor	4	4	80.959
Myo X 3 P1(2020) R1	Myo	1	HS	0	G	HS	34639	Tor-IR	Tor	4	4	71.388
Myo X 3 P1(2020) R1	Myo	1	HS	0	G	HS	34639	Tor-IR	Tor	4	4	51.048
Myo X 3 P1(2020) R1	Myo	1	HS	0	G	HS	34639	Tor-IR	Tor	4	5	66.203
Myo X 3 P1(2020) R1	Myo	1	HS	0	G	HS	34639	Tor-IR	Tor	4	5	78.965
Myo X 3 P1(2020) R1	Myo	1	HS	0	G	HS	34639	Tor-IR	Tor	4	5	70.191
Myo X 3 P1(2020) R1	Myo	1	HS	0	G	HS	34639	Tor-IR	Tor	4	5	52.643
Myo X 3 P1(2020) R1	Myo	1	HS	0	G	HS	34639	Tor-IR	Tor	4	5	38.485
Myo X 3 P1(2020) R1	Myo	1	HS	0	G	HS	34639	Tor-IR	Tor	4	5	40.081
Myo X 3 P1(2020) R1	Myo	1	HS	0	G	HS	34639	Tor-IR	Tor	4	5	71.188
Myo X 3 P1(2020) R1	Myo	1	HS	0	G	HS	34639	Tor-IR	Tor	4	5	160.323
Myo X 3 P1(2020) R1	Myo	1	HS	0	G	HS	34639	Tor-IR	Tor	4	5	105.885
Myo X 3 P1(2020) R1	Myo	1	HS	0	G	HS	34639	Tor-IR	Tor	4	5	105.087
Myo X 3 P1(2020) R1	Myo	1	HS	0	G	HS	34639	Tor-IR	Tor	4	5	91.727
Myo X 3 P1(2020) R1	Myo	1	HS	0	G	HS	34639	Tor-IR	Tor	4	5	108.876
Myo X 3 P1(2020) R1	Myo	1	HS	0	G	HS	34639	Tor-IR	Tor	4	5	72.584
Myo X 3 P1(2020) R1	Myo	1	HS	0	G	HS	34639	Tor-IR	Tor	4	5	44.268
Myo X 3 P1(2020) R1	Myo	1	HS	0	G	HS	34639	Tor-IR	Tor	4	5	34.497
Myo X 3 P1(2020) R1	Myo	1	HS	0	G	HS	34639	Tor-IR	Tor	4	5	73.98
Myo X 3 P1(2020) R1	Myo	1	HS	0	G	HS	34639	Tor-IR	Tor	4	5	123.233
Myo X 3 P1(2020) R1	Myo	1	HS	0	G	HS	34639	Tor-IR	Tor	4	5	67.001
Myo X 3 P1(2020) R1	Myo	1	HS	0	G	HS	34639	Tor-IR	Tor	4	5	95.117
Myo X 3 P1(2020) R1	Myo	1	HS	0	G	HS	34639	Tor-IR	Tor	4	5	95.516
Myo X 3 P1(2020) R1	Myo	1	HS	0	G	HS	34639	Tor-IR	Tor	4	5	91.727
Myo X 3 P1(2020) R1	Myo	1	HS	0	G	HS	34639	Tor-IR	Tor	4	5	113.861
Myo X 3 P1(2020) R1	Myo	1	HS	0	G	HS	34639	Tor-IR	Tor	4	5	48.855
Myo X 3 P1(2020) R1	Myo	1	HS	0	G	HS	34639	Tor-IR	Tor	4	5	66.801
Myo X 3 P1(2020) R1	Myo	1	HS	0	G	HS	34639	Tor-IR	Tor	4	5	87.141
Myo X 3 P1(2020) R1	Myo	1	HS	0	G	HS	34639	Tor-IR	Tor	4	5	66.402
Myo X 3 P1(2020) R1	Myo	1	HS	0	G	HS	34639	Tor-IR	Tor	4	5	74.778
Myo X 3 P1(2020) R1	Myo	1	HS	0	G	HS	34639	Tor-IR	Tor	4	5	84.349
Myo X 3 P1(2020) R1	Myo	1	HS	0	G	HS	34639	Tor-IR	Tor	4	5	36.89
Myo X 3 P1(2020) R1	Myo	1	HS	0	G	HS	34639	Tor-IR	Tor	4	5	33.5
Myo X 2 P1(2020) R2	Myo	2	HS	0	G	HS	34639	Tor-IR	Tor	4	1	113.462
Myo X 2 P1(2020) R2	Myo	2	HS	0	G	HS	34639	Tor-IR	Tor	4	1	149.356
Myo X 2 P1(2020) R2	Myo	2	HS	0	G	HS	34639	Tor-IR	Tor	4	1	100.7
Myo X 2 P1(2020) R2	Myo	2	HS	0	G	HS	34639	Tor-IR	Tor	4	1	148.558
Myo X 2 P1(2020) R2	Myo	2	HS	0	G	HS	34639	Tor-IR	Tor	4	1	221.74
Myo X 2 P1(2020) R2	Myo	2	HS	0	G	HS	34639	Tor-IR	Tor	4	1	177.472
Myo X 2 P1(2020) R2	Myo	2	HS	0	G	HS	34639	Tor-IR	Tor	4	1	190.633
Myo X 2 P1(2020) R2	Myo	2	HS	0	G	HS	34639	Tor-IR	Tor	4	1	121.04
Myo X 2 P1(2020) R2	Myo	2	HS	0	G	HS	34639	Tor-IR	Tor	4	1	152.546
Myo X 2 P1(2020) R2	Myo	2	HS	0	G	HS	34639	Tor-IR	Tor	4	1	160.323
Myo X 2 P1(2020) R2	Myo	2	HS	0	G	HS	34639	Tor-IR	Tor	4	1	129.016
Myo X 2 P1(2020) R2	Myo	2	HS	0	G	HS	34639	Tor-IR	Tor	4	1	198.21
Myo X 2 P1(2020) R2	Myo	2	HS	0	G	HS	34639	Tor-IR	Tor	4	1	286.747
Myo X 2 P1(2020) R2	Myo	2	HS	0	G	HS	34639	Tor-IR	Tor	4	1	189.636
Myo X 2 P1(2020) R2	Myo	2	HS	0	G	HS	34639	Tor-IR	Tor	4	1	58.825
Myo X 2 P1(2020) R2	Myo	2	HS	0	G	HS	34639	Tor-IR	Tor	4	1	150.153
Myo X 2 P1(2020) R2	Myo	2	HS	0	G	HS	34639	Tor-IR	Tor	4	1	112.266
Myo X 2 P1(2020) R2	Myo	2	HS	0	G	HS	34639	Tor-IR	Tor	4	1	138.388
Myo X 2 P1(2020) R2	Myo	2	HS	0	G	HS	34639	Tor-IR	Tor	4	1	168.897
Myo X 2 P1(2020) R2	Myo	2	HS	0	G	HS	34639	Tor-IR	Tor	4	1	256.636
Myo X 2 P1(2020) R2	Myo	2	HS	0	G	HS	34639	Tor-IR	Tor	4	1	199.207
Myo X 2 P1(2020) R2	Myo	2	HS	0	G	HS	34639	Tor-IR	Tor	4	1	122.436
Myo X 2 P1(2020) R2	Myo	2	HS	0	G	HS	34639	Tor-IR	Tor	4	1	310.875
Myo X 2 P1(2020) R2	Myo	2	HS	0	G	HS	34639	Tor-IR	Tor	4	1	234.702
Myo X 2 P1(2020) R2	Myo	2	HS	0	G	HS	34639	Tor-IR	Tor	4	1	91.328
Myo X 2 P1(2020) R2	Myo	2	HS	0	G	HS	34639	Tor-IR	Tor	4	1	100.302
Myo X 2 P1(2020) R2	Myo	2	HS	0	G	HS	34639	Tor-IR	Tor	4	1	80.56
Myo X 2 P1(2020) R2	Myo	2	HS	0	G	HS	34639	Tor-IR	Tor	4	1	231.711
Myo X 2 P1(2020) R2	Myo	2	HS	0	G	HS	34639	Tor-IR	Tor	4	1	141.978
Myo X 2 P1(2020) R2	Myo	2	HS	0	G	HS	34639	Tor-IR	Tor	4	1	240.285
Myo X 2 P1(2020) R2	Myo	2	HS	0	G	HS	34639	Tor-IR	Tor	4	2	90.531
Myo X 2 P1(2020) R2	Myo	2	HS	0	G	HS	34639	Tor-IR	Tor	4	2	139.385
Myo X 2 P1(2020) R2	Myo	2	HS	0	G	HS	34639	Tor-IR	Tor	4	2	145.567
Myo X 2 P1(2020) R2	Myo	2	HS	0	G	HS	34639	Tor-IR	Tor	4	2	84.748
Myo X 2 P1(2020) R2	Myo	2	HS	0	G	HS	34639	Tor-IR	Tor	4	2	104.888
Myo X 2 P1(2020) R2	Myo	2	HS	0	G	HS	34639	Tor-IR	Tor	4	2	112.665
Myo X 2 P1(2020) R2	Myo	2	HS	0	G	HS	34639	Tor-IR	Tor	4	2	86.144
Myo X 2 P1(2020) R2	Myo	2	HS	0	G	HS	34639	Tor-IR	Tor	4	2	107.879
Myo X 2 P1(2020) R2	Myo	2	HS	0	G	HS	34639	Tor-IR	Tor	4	2	80.76
Myo X 2 P1(2020) R2	Myo	2	HS	0	G	HS	34639	Tor-IR	Tor	4	2	124.43
Myo X 2 P1(2020) R2	Myo	2	HS	0	G	HS	34639	Tor-IR	Tor	4	2	74.778
Myo X 2 P1(2020) R2	Myo	2	HS	0	G	HS	34639	Tor-IR	Tor	4	2	110.073
Myo X 2 P1(2020) R2	Myo	2	HS	0	G	HS	34639	Tor-IR	Tor	4	2	119.843
Myo X 2 P1(2020) R2	Myo	2	HS	0	G	HS	34639	Tor-IR	Tor	4	2	169.296
Myo X 2 P1(2020) R2	Myo	2	HS	0	G	HS	34639	Tor-IR	Tor	4	2	85.346
Myo X 2 P1(2020) R2	Myo	2	HS	0	G	HS	34639	Tor-IR	Tor	4	2	133.004
Myo X 2 P1(2020) R2	Myo	2	HS	0	G	HS	34639	Tor-IR	Tor	4	2	163.314
Myo X 2 P1(2020) R2	Myo	2	HS	0	G	HS	34639	Tor-IR	Tor	4	2	148.159
Myo X 2 P1(2020) R2	Myo	2	HS	0	G	HS	34639	Tor-IR	Tor	4	2	259.428
Myo X 2 P1(2020) R2	Myo	2	HS	0	G	HS	34639	Tor-IR	Tor	4	2	82.953
Myo X 2 P1(2020) R2	Myo	2	HS	0	G	HS	34639	Tor-IR	Tor	4	2	107.68
Myo X 2 P1(2020) R2	Myo	2	HS	0	G	HS	34639	Tor-IR	Tor	4	2	120.242
Myo X 2 P1(2020) R2	Myo	2	HS	0	G	HS	34639	Tor-IR	Tor	4	2	84.748
Myo X 2 P1(2020) R2	Myo	2	HS	0	G	HS	34639	Tor-IR	Tor	4	2	184.451
Myo X 2 P1(2020) R2	Myo	2	HS	0	G	HS	34639	Tor-IR	Tor	4	2	225.928
Myo X 2 P1(2020) R2	Myo	2	HS	0	G	HS	34639	Tor-IR	Tor	4	2	127.421
Myo X 2 P1(2020) R2	Myo	2	HS	0	G	HS	34639	Tor-IR	Tor	4	2	179.865
Myo X 2 P1(2020) R2	Myo	2	HS	0	G	HS	34639	Tor-IR	Tor	4	2	100.9
Myo X 2 P1(2020) R2	Myo	2	HS	0	G	HS	34639	Tor-IR	Tor	4	2	185.448
Myo X 2 P1(2020) R2	Myo	2	HS	0	G	HS	34639	Tor-IR	Tor	4	2	78.566
Myo X 2 P1(2020) R2	Myo	2	HS	0	G	HS	34639	Tor-IR	Tor	4	3	113.064
Myo X 2 P1(2020) R2	Myo	2	HS	0	G	HS	34639	Tor-IR	Tor	4	3	91.129
Myo X 2 P1(2020) R2	Myo	2	HS	0	G	HS	34639	Tor-IR	Tor	4	3	61.018
Myo X 2 P1(2020) R2	Myo	2	HS	0	G	HS	34639	Tor-IR	Tor	4	3	81.159
Myo X 2 P1(2020) R2	Myo	2	HS	0	G	HS	34639	Tor-IR	Tor	4	3	107.879
Myo X 2 P1(2020) R2	Myo	2	HS	0	G	HS	34639	Tor-IR	Tor	4	3	138.588
Myo X 2 P1(2020) R2	Myo	2	HS	0	G	HS	34639	Tor-IR	Tor	4	3	62.614
Myo X 2 P1(2020) R2	Myo	2	HS	0	G	HS	34639	Tor-IR	Tor	4	3	144.769
Myo X 2 P1(2020) R2	Myo	2	HS	0	G	HS	34639	Tor-IR	Tor	4	3	56.432
Myo X 2 P1(2020) R2	Myo	2	HS	0	G	HS	34639	Tor-IR	Tor	4	3	82.355
Myo X 2 P1(2020) R2	Myo	2	HS	0	G	HS	34639	Tor-IR	Tor	4	3	201.401
Myo X 2 P1(2020) R2	Myo	2	HS	0	G	HS	34639	Tor-IR	Tor	4	3	142.376
Myo X 2 P1(2020) R2	Myo	2	HS	0	G	HS	34639	Tor-IR	Tor	4	3	108.677
Myo X 2 P1(2020) R2	Myo	2	HS	0	G	HS	34639	Tor-IR	Tor	4	3	110.671
Myo X 2 P1(2020) R2	Myo	2	HS	0	G	HS	34639	Tor-IR	Tor	4	3	134.799
Myo X 2 P1(2020) R2	Myo	2	HS	0	G	HS	34639	Tor-IR	Tor	4	3	121.439
Myo X 2 P1(2020) R2	Myo	2	HS	0	G	HS	34639	Tor-IR	Tor	4	3	141.778
Myo X 2 P1(2020) R2	Myo	2	HS	0	G	HS	34639	Tor-IR	Tor	4	3	143.174
Myo X 2 P1(2020) R2	Myo	2	HS	0	G	HS	34639	Tor-IR	Tor	4	3	112.465
Myo X 2 P1(2020) R2	Myo	2	HS	0	G	HS	34639	Tor-IR	Tor	4	3	69.194
Myo X 2 P1(2020) R2	Myo	2	HS	0	G	HS	34639	Tor-IR	Tor	4	3	95.516
Myo X 2 P1(2020) R2	Myo	2	HS	0	G	HS	34639	Tor-IR	Tor	4	3	73.78
Myo X 2 P1(2020) R2	Myo	2	HS	0	G	HS	34639	Tor-IR	Tor	4	3	76.173
Myo X 2 P1(2020) R2	Myo	2	HS	0	G	HS	34639	Tor-IR	Tor	4	3	53.242
Myo X 2 P1(2020) R2	Myo	2	HS	0	G	HS	34639	Tor-IR	Tor	4	3	95.915
Myo X 2 P1(2020) R2	Myo	2	HS	0	G	HS	34639	Tor-IR	Tor	4	3	107.081
Myo X 2 P1(2020) R2	Myo	2	HS	0	G	HS	34639	Tor-IR	Tor	4	3	69.194
Myo X 2 P1(2020) R2	Myo	2	HS	0	G	HS	34639	Tor-IR	Tor	4	3	63.611
Myo X 2 P1(2020) R2	Myo	2	HS	0	G	HS	34639	Tor-IR	Tor	4	3	128.817
Myo X 2 P1(2020) R2	Myo	2	HS	0	G	HS	34639	Tor-IR	Tor	4	3	98.906
Myo X 2 P1(2020) R2	Myo	2	HS	0	G	HS	34639	Tor-IR	Tor	4	4	67.798
Myo X 2 P1(2020) R2	Myo	2	HS	0	G	HS	34639	Tor-IR	Tor	4	4	51.846
Myo X 2 P1(2020) R2	Myo	2	HS	0	G	HS	34639	Tor-IR	Tor	4	4	49.054
Myo X 2 P1(2020) R2	Myo	2	HS	0	G	HS	34639	Tor-IR	Tor	4	4	43.271
Myo X 2 P1(2020) R2	Myo	2	HS	0	G	HS	34639	Tor-IR	Tor	4	4	76.173
Myo X 2 P1(2020) R2	Myo	2	HS	0	G	HS	34639	Tor-IR	Tor	4	4	56.233
Myo X 2 P1(2020) R2	Myo	2	HS	0	G	HS	34639	Tor-IR	Tor	4	4	73.581
Myo X 2 P1(2020) R2	Myo	2	HS	0	G	HS	34639	Tor-IR	Tor	4	4	55.834
Myo X 2 P1(2020) R2	Myo	2	HS	0	G	HS	34639	Tor-IR	Tor	4	4	121.04
Myo X 2 P1(2020) R2	Myo	2	HS	0	G	HS	34639	Tor-IR	Tor	4	4	42.872
Myo X 2 P1(2020) R2	Myo	2	HS	0	G	HS	34639	Tor-IR	Tor	4	4	59.822
Myo X 2 P1(2020) R2	Myo	2	HS	0	G	HS	34639	Tor-IR	Tor	4	4	69.394
Myo X 2 P1(2020) R2	Myo	2	HS	0	G	HS	34639	Tor-IR	Tor	4	4	85.944
Myo X 2 P1(2020) R2	Myo	2	HS	0	G	HS	34639	Tor-IR	Tor	4	4	115.058
Myo X 2 P1(2020) R2	Myo	2	HS	0	G	HS	34639	Tor-IR	Tor	4	4	72.783
Myo X 2 P1(2020) R2	Myo	2	HS	0	G	HS	34639	Tor-IR	Tor	4	4	68.795
Myo X 2 P1(2020) R2	Myo	2	HS	0	G	HS	34639	Tor-IR	Tor	4	4	68.596
Myo X 2 P1(2020) R2	Myo	2	HS	0	G	HS	34639	Tor-IR	Tor	4	4	73.382
Myo X 2 P1(2020) R2	Myo	2	HS	0	G	HS	34639	Tor-IR	Tor	4	4	58.626
Myo X 2 P1(2020) R2	Myo	2	HS	0	G	HS	34639	Tor-IR	Tor	4	4	53.242
Myo X 2 P1(2020) R2	Myo	2	HS	0	G	HS	34639	Tor-IR	Tor	4	4	50.649
Myo X 2 P1(2020) R2	Myo	2	HS	0	G	HS	34639	Tor-IR	Tor	4	4	68.397
Myo X 2 P1(2020) R2	Myo	2	HS	0	G	HS	34639	Tor-IR	Tor	4	4	54.438
Myo X 2 P1(2020) R2	Myo	2	HS	0	G	HS	34639	Tor-IR	Tor	4	4	51.846
Myo X 2 P1(2020) R2	Myo	2	HS	0	G	HS	34639	Tor-IR	Tor	4	4	41.477
Myo X 2 P1(2020) R2	Myo	2	HS	0	G	HS	34639	Tor-IR	Tor	4	4	46.063
Myo X 2 P1(2020) R2	Myo	2	HS	0	G	HS	34639	Tor-IR	Tor	4	4	65.007
Myo X 2 P1(2020) R2	Myo	2	HS	0	G	HS	34639	Tor-IR	Tor	4	4	74.977
Myo X 2 P1(2020) R2	Myo	2	HS	0	G	HS	34639	Tor-IR	Tor	4	4	124.031
Myo X 2 P1(2020) R2	Myo	2	HS	0	G	HS	34639	Tor-IR	Tor	4	4	40.48
Myo X 2 P1(2020) R2	Myo	2	HS	0	G	HS	34639	Tor-IR	Tor	4	5	91.927
Myo X 2 P1(2020) R2	Myo	2	HS	0	G	HS	34639	Tor-IR	Tor	4	5	77.17
Myo X 2 P1(2020) R2	Myo	2	HS	0	G	HS	34639	Tor-IR	Tor	4	5	65.405
Myo X 2 P1(2020) R2	Myo	2	HS	0	G	HS	34639	Tor-IR	Tor	4	5	77.769
Myo X 2 P1(2020) R2	Myo	2	HS	0	G	HS	34639	Tor-IR	Tor	4	5	102.296
Myo X 2 P1(2020) R2	Myo	2	HS	0	G	HS	34639	Tor-IR	Tor	4	5	157.93
Myo X 2 P1(2020) R2	Myo	2	HS	0	G	HS	34639	Tor-IR	Tor	4	5	54.637
Myo X 2 P1(2020) R2	Myo	2	HS	0	G	HS	34639	Tor-IR	Tor	4	5	97.31
Myo X 2 P1(2020) R2	Myo	2	HS	0	G	HS	34639	Tor-IR	Tor	4	5	75.176
Myo X 2 P1(2020) R2	Myo	2	HS	0	G	HS	34639	Tor-IR	Tor	4	5	70.59
Myo X 2 P1(2020) R2	Myo	2	HS	0	G	HS	34639	Tor-IR	Tor	4	5	92.724
Myo X 2 P1(2020) R2	Myo	2	HS	0	G	HS	34639	Tor-IR	Tor	4	5	84.15
Myo X 2 P1(2020) R2	Myo	2	HS	0	G	HS	34639	Tor-IR	Tor	4	5	87.739
Myo X 2 P1(2020) R2	Myo	2	HS	0	G	HS	34639	Tor-IR	Tor	4	5	111.468
Myo X 2 P1(2020) R2	Myo	2	HS	0	G	HS	34639	Tor-IR	Tor	4	5	91.328
Myo X 2 P1(2020) R2	Myo	2	HS	0	G	HS	34639	Tor-IR	Tor	4	5	77.769
Myo X 2 P1(2020) R2	Myo	2	HS	0	G	HS	34639	Tor-IR	Tor	4	5	94.918
Myo X 2 P1(2020) R2	Myo	2	HS	0	G	HS	34639	Tor-IR	Tor	4	5	38.884
Myo X 2 P1(2020) R2	Myo	2	HS	0	G	HS	34639	Tor-IR	Tor	4	5	74.578
Myo X 2 P1(2020) R2	Myo	2	HS	0	G	HS	34639	Tor-IR	Tor	4	5	65.804
Myo X 2 P1(2020) R2	Myo	2	HS	0	G	HS	34639	Tor-IR	Tor	4	5	67.001
Myo X 2 P1(2020) R2	Myo	2	HS	0	G	HS	34639	Tor-IR	Tor	4	5	92.724
Myo X 2 P1(2020) R2	Myo	2	HS	0	G	HS	34639	Tor-IR	Tor	4	5	44.268
Myo X 2 P1(2020) R2	Myo	2	HS	0	G	HS	34639	Tor-IR	Tor	4	5	67.599
Myo X 2 P1(2020) R2	Myo	2	HS	0	G	HS	34639	Tor-IR	Tor	4	5	39.483
Myo X 2 P1(2020) R2	Myo	2	HS	0	G	HS	34639	Tor-IR	Tor	4	5	48.057
Myo X 2 P1(2020) R2	Myo	2	HS	0	G	HS	34639	Tor-IR	Tor	4	5	55.834
Myo X 2 P1(2020) R2	Myo	2	HS	0	G	HS	34639	Tor-IR	Tor	4	5	63.411
Myo X 2 P1(2020) R2	Myo	2	HS	0	G	HS	34639	Tor-IR	Tor	4	5	141.579
Myo X 2 P1(2020) R2	Myo	2	HS	0	G	HS	34639	Tor-IR	Tor	4	5	58.227
Myo X 2 P1(2020) R2	Myo	2	HS	0	G	HS	34639	Tor-IR	Tor	4	6	110.671
Myo X 2 P1(2020) R2	Myo	2	HS	0	G	HS	34639	Tor-IR	Tor	4	6	90.331
Myo X 2 P1(2020) R2	Myo	2	HS	0	G	HS	34639	Tor-IR	Tor	4	6	103.093
Myo X 2 P1(2020) R2	Myo	2	HS	0	G	HS	34639	Tor-IR	Tor	4	6	67.399
Myo X 2 P1(2020) R2	Myo	2	HS	0	G	HS	34639	Tor-IR	Tor	4	6	59.623
Myo X 2 P1(2020) R2	Myo	2	HS	0	G	HS	34639	Tor-IR	Tor	4	6	109.474
Myo X 2 P1(2020) R2	Myo	2	HS	0	G	HS	34639	Tor-IR	Tor	4	6	84.349
Myo X 2 P1(2020) R2	Myo	2	HS	0	G	HS	34639	Tor-IR	Tor	4	6	94.12
Myo X 2 P1(2020) R2	Myo	2	HS	0	G	HS	34639	Tor-IR	Tor	4	6	64.01
Myo X 2 P1(2020) R2	Myo	2	HS	0	G	HS	34639	Tor-IR	Tor	4	6	67.001
Myo X 2 P1(2020) R2	Myo	2	HS	0	G	HS	34639	Tor-IR	Tor	4	6	81.757
Myo X 2 P1(2020) R2	Myo	2	HS	0	G	HS	34639	Tor-IR	Tor	4	6	91.129
Myo X 2 P1(2020) R2	Myo	2	HS	0	G	HS	34639	Tor-IR	Tor	4	6	60.021
Myo X 2 P1(2020) R2	Myo	2	HS	0	G	HS	34639	Tor-IR	Tor	4	6	43.67
Myo X 2 P1(2020) R2	Myo	2	HS	0	G	HS	34639	Tor-IR	Tor	4	6	35.694
Myo X 2 P1(2020) R2	Myo	2	HS	0	G	HS	34639	Tor-IR	Tor	4	6	77.569
Myo X 2 P1(2020) R2	Myo	2	HS	0	G	HS	34639	Tor-IR	Tor	4	6	93.921
Myo X 2 P1(2020) R2	Myo	2	HS	0	G	HS	34639	Tor-IR	Tor	4	6	87.938
Myo X 2 P1(2020) R2	Myo	2	HS	0	G	HS	34639	Tor-IR	Tor	4	6	39.682
Myo X 2 P1(2020) R2	Myo	2	HS	0	G	HS	34639	Tor-IR	Tor	4	6	72.584
Myo X 2 P1(2020) R2	Myo	2	HS	0	G	HS	34639	Tor-IR	Tor	4	6	93.721
Myo X 2 P1(2020) R2	Myo	2	HS	0	G	HS	34639	Tor-IR	Tor	4	6	87.141
Myo X 2 P1(2020) R2	Myo	2	HS	0	G	HS	34639	Tor-IR	Tor	4	6	51.248
Myo X 2 P1(2020) R2	Myo	2	HS	0	G	HS	34639	Tor-IR	Tor	4	6	36.093
Myo X 2 P1(2020) R2	Myo	2	HS	0	G	HS	34639	Tor-IR	Tor	4	6	60.62
Myo X 2 P1(2020) R2	Myo	2	HS	0	G	HS	34639	Tor-IR	Tor	4	6	72.983
Myo X 2 P1(2020) R2	Myo	2	HS	0	G	HS	34639	Tor-IR	Tor	4	6	96.313
Myo X 2 P1(2020) R2	Myo	2	HS	0	G	HS	34639	Tor-IR	Tor	4	6	67.998
Myo X 2 P1(2020) R2	Myo	2	HS	0	G	HS	34639	Tor-IR	Tor	4	6	39.283
Myo X 2 P1(2020) R2	Myo	2	HS	0	G	HS	34639	Tor-IR	Tor	4	6	87.34
Myo X 2 P1(2020) R2	Myo	2	HS	0	G	HS	34639	Tor-IR	Tor	4	7	84.947
Myo X 2 P1(2020) R2	Myo	2	HS	0	G	HS	34639	Tor-IR	Tor	4	7	76.173
Myo X 2 P1(2020) R2	Myo	2	HS	0	G	HS	34639	Tor-IR	Tor	4	7	89.135
Myo X 2 P1(2020) R2	Myo	2	HS	0	G	HS	34639	Tor-IR	Tor	4	7	73.78
Myo X 2 P1(2020) R2	Myo	2	HS	0	G	HS	34639	Tor-IR	Tor	4	7	67.399
Myo X 2 P1(2020) R2	Myo	2	HS	0	G	HS	34639	Tor-IR	Tor	4	7	59.024
Myo X 2 P1(2020) R2	Myo	2	HS	0	G	HS	34639	Tor-IR	Tor	4	7	55.834
Myo X 2 P1(2020) R2	Myo	2	HS	0	G	HS	34639	Tor-IR	Tor	4	7	78.167
Myo X 2 P1(2020) R2	Myo	2	HS	0	G	HS	34639	Tor-IR	Tor	4	7	57.429
Myo X 2 P1(2020) R2	Myo	2	HS	0	G	HS	34639	Tor-IR	Tor	4	7	60.42
Myo X 2 P1(2020) R2	Myo	2	HS	0	G	HS	34639	Tor-IR	Tor	4	7	43.869
Myo X 2 P1(2020) R2	Myo	2	HS	0	G	HS	34639	Tor-IR	Tor	4	7	56.033
Myo X 2 P1(2020) R2	Myo	2	HS	0	G	HS	34639	Tor-IR	Tor	4	7	58.227
Myo X 2 P1(2020) R2	Myo	2	HS	0	G	HS	34639	Tor-IR	Tor	4	7	65.007
Myo X 2 P1(2020) R2	Myo	2	HS	0	G	HS	34639	Tor-IR	Tor	4	7	48.855
Myo X 2 P1(2020) R2	Myo	2	HS	0	G	HS	34639	Tor-IR	Tor	4	7	58.626
Myo X 2 P1(2020) R2	Myo	2	HS	0	G	HS	34639	Tor-IR	Tor	4	7	43.271
Myo X 2 P1(2020) R2	Myo	2	HS	0	G	HS	34639	Tor-IR	Tor	4	7	34.497
Myo X 2 P1(2020) R2	Myo	2	HS	0	G	HS	34639	Tor-IR	Tor	4	7	66.203
Myo X 2 P1(2020) R2	Myo	2	HS	0	G	HS	34639	Tor-IR	Tor	4	7	61.816
Myo X 2 P1(2020) R2	Myo	2	HS	0	G	HS	34639	Tor-IR	Tor	4	7	75.176
Myo X 2 P1(2020) R2	Myo	2	HS	0	G	HS	34639	Tor-IR	Tor	4	7	103.293
Myo X 2 P1(2020) R2	Myo	2	HS	0	G	HS	34639	Tor-IR	Tor	4	7	84.15
Myo X 2 P1(2020) R2	Myo	2	HS	0	G	HS	34639	Tor-IR	Tor	4	7	82.953
Myo X 2 P1(2020) R2	Myo	2	HS	0	G	HS	34639	Tor-IR	Tor	4	7	48.855
Myo X 2 P1(2020) R2	Myo	2	HS	0	G	HS	34639	Tor-IR	Tor	4	7	72.783
Myo X 2 P1(2020) R2	Myo	2	HS	0	G	HS	34639	Tor-IR	Tor	4	7	58.426
Myo X 2 P1(2020) R2	Myo	2	HS	0	G	HS	34639	Tor-IR	Tor	4	7	46.063
Myo X 2 P1(2020) R2	Myo	2	HS	0	G	HS	34639	Tor-IR	Tor	4	7	90.331
Myo X 2 P1(2020) R2	Myo	2	HS	0	G	HS	34639	Tor-IR	Tor	4	7	53.441
Myo X 2 P1(2020) R2	Myo	2	HS	0	G	HS	34639	Tor-IR	Tor	4	8	142.177
Myo X 2 P1(2020) R2	Myo	2	HS	0	G	HS	34639	Tor-IR	Tor	4	8	193.823
Myo X 2 P1(2020) R2	Myo	2	HS	0	G	HS	34639	Tor-IR	Tor	4	8	70.989
Myo X 2 P1(2020) R2	Myo	2	HS	0	G	HS	34639	Tor-IR	Tor	4	8	98.308
Myo X 2 P1(2020) R2	Myo	2	HS	0	G	HS	34639	Tor-IR	Tor	4	8	107.48
Myo X 2 P1(2020) R2	Myo	2	HS	0	G	HS	34639	Tor-IR	Tor	4	8	145.966
Myo X 2 P1(2020) R2	Myo	2	HS	0	G	HS	34639	Tor-IR	Tor	4	8	80.959
Myo X 2 P1(2020) R2	Myo	2	HS	0	G	HS	34639	Tor-IR	Tor	4	8	84.548
Myo X 2 P1(2020) R2	Myo	2	HS	0	G	HS	34639	Tor-IR	Tor	4	8	58.626
Myo X 2 P1(2020) R2	Myo	2	HS	0	G	HS	34639	Tor-IR	Tor	4	8	60.62
Myo X 2 P1(2020) R2	Myo	2	HS	0	G	HS	34639	Tor-IR	Tor	4	8	127.022
Myo X 2 P1(2020) R2	Myo	2	HS	0	G	HS	34639	Tor-IR	Tor	4	8	167.103
Myo X 2 P1(2020) R2	Myo	2	HS	0	G	HS	34639	Tor-IR	Tor	4	8	143.174
Myo X 2 P1(2020) R2	Myo	2	HS	0	G	HS	34639	Tor-IR	Tor	4	8	66.801
Myo X 2 P1(2020) R2	Myo	2	HS	0	G	HS	34639	Tor-IR	Tor	4	8	55.834
Myo X 2 P1(2020) R2	Myo	2	HS	0	G	HS	34639	Tor-IR	Tor	4	8	59.224
Myo X 2 P1(2020) R2	Myo	2	HS	0	G	HS	34639	Tor-IR	Tor	4	8	65.804
Myo X 2 P1(2020) R2	Myo	2	HS	0	G	HS	34639	Tor-IR	Tor	4	8	67.399
Myo X 2 P1(2020) R2	Myo	2	HS	0	G	HS	34639	Tor-IR	Tor	4	8	144.37
Myo X 2 P1(2020) R2	Myo	2	HS	0	G	HS	34639	Tor-IR	Tor	4	8	187.442
Myo X 2 P1(2020) R2	Myo	2	HS	0	G	HS	34639	Tor-IR	Tor	4	8	289.539
Myo X 2 P1(2020) R2	Myo	2	HS	0	G	HS	34639	Tor-IR	Tor	4	8	119.644
Myo X 2 P1(2020) R2	Myo	2	HS	0	G	HS	34639	Tor-IR	Tor	4	8	133.403
Myo X 2 P1(2020) R2	Myo	2	HS	0	G	HS	34639	Tor-IR	Tor	4	8	109.474
Myo X 2 P1(2020) R2	Myo	2	HS	0	G	HS	34639	Tor-IR	Tor	4	8	97.909
Myo X 2 P1(2020) R2	Myo	2	HS	0	G	HS	34639	Tor-IR	Tor	4	8	159.127
Myo X 2 P1(2020) R2	Myo	2	HS	0	G	HS	34639	Tor-IR	Tor	4	8	127.421
Myo X 2 P1(2020) R2	Myo	2	HS	0	G	HS	34639	Tor-IR	Tor	4	8	120.242
Myo X 2 P1(2020) R2	Myo	2	HS	0	G	HS	34639	Tor-IR	Tor	4	8	152.945
Myo X 2 P1(2020) R2	Myo	2	HS	0	G	HS	34639	Tor-IR	Tor	4	8	80.56
Myo X 2 P1(2020) R2	Myo	2	HS	0	G	HS	34639	Tor-IR	Tor	4	9	100.7
Myo X 2 P1(2020) R2	Myo	2	HS	0	G	HS	34639	Tor-IR	Tor	4	9	70.789
Myo X 2 P1(2020) R2	Myo	2	HS	0	G	HS	34639	Tor-IR	Tor	4	9	122.037
Myo X 2 P1(2020) R2	Myo	2	HS	0	G	HS	34639	Tor-IR	Tor	4	9	54.239
Myo X 2 P1(2020) R2	Myo	2	HS	0	G	HS	34639	Tor-IR	Tor	4	9	36.292
Myo X 2 P1(2020) R2	Myo	2	HS	0	G	HS	34639	Tor-IR	Tor	4	9	58.825
Myo X 2 P1(2020) R2	Myo	2	HS	0	G	HS	34639	Tor-IR	Tor	4	9	100.302
Myo X 2 P1(2020) R2	Myo	2	HS	0	G	HS	34639	Tor-IR	Tor	4	9	82.554
Myo X 2 P1(2020) R2	Myo	2	HS	0	G	HS	34639	Tor-IR	Tor	4	9	104.29
Myo X 2 P1(2020) R2	Myo	2	HS	0	G	HS	34639	Tor-IR	Tor	4	9	62.614
Myo X 2 P1(2020) R2	Myo	2	HS	0	G	HS	34639	Tor-IR	Tor	4	9	126.823
Myo X 2 P1(2020) R2	Myo	2	HS	0	G	HS	34639	Tor-IR	Tor	4	9	67.2
Myo X 2 P1(2020) R2	Myo	2	HS	0	G	HS	34639	Tor-IR	Tor	4	9	97.111
Myo X 2 P1(2020) R2	Myo	2	HS	0	G	HS	34639	Tor-IR	Tor	4	9	113.064
Myo X 2 P1(2020) R2	Myo	2	HS	0	G	HS	34639	Tor-IR	Tor	4	9	106.882
Myo X 2 P1(2020) R2	Myo	2	HS	0	G	HS	34639	Tor-IR	Tor	4	9	104.09
Myo X 2 P1(2020) R2	Myo	2	HS	0	G	HS	34639	Tor-IR	Tor	4	9	115.855
Myo X 2 P1(2020) R2	Myo	2	HS	0	G	HS	34639	Tor-IR	Tor	4	9	63.611
Myo X 2 P1(2020) R2	Myo	2	HS	0	G	HS	34639	Tor-IR	Tor	4	9	88.736
Myo X 2 P1(2020) R2	Myo	2	HS	0	G	HS	34639	Tor-IR	Tor	4	9	50.45
Myo X 2 P1(2020) R2	Myo	2	HS	0	G	HS	34639	Tor-IR	Tor	4	9	111.07
Myo X 2 P1(2020) R2	Myo	2	HS	0	G	HS	34639	Tor-IR	Tor	4	9	67.399
Myo X 2 P1(2020) R2	Myo	2	HS	0	G	HS	34639	Tor-IR	Tor	4	9	94.12
Myo X 8 P1(2020) R2	Myo	2	HS	0	G	HS	Cs	Control	Control	4	1	189.636
Myo X 8 P1(2020) R2	Myo	2	HS	0	G	HS	Cs	Control	Control	4	1	139.186
Myo X 8 P1(2020) R2	Myo	2	HS	0	G	HS	Cs	Control	Control	4	1	160.323
Myo X 8 P1(2020) R2	Myo	2	HS	0	G	HS	Cs	Control	Control	4	1	88.138
Myo X 8 P1(2020) R2	Myo	2	HS	0	G	HS	Cs	Control	Control	4	1	101.697
Myo X 8 P1(2020) R2	Myo	2	HS	0	G	HS	Cs	Control	Control	4	1	96.313
Myo X 8 P1(2020) R2	Myo	2	HS	0	G	HS	Cs	Control	Control	4	1	115.058
Myo X 8 P1(2020) R2	Myo	2	HS	0	G	HS	Cs	Control	Control	4	1	128.617
Myo X 8 P1(2020) R2	Myo	2	HS	0	G	HS	Cs	Control	Control	4	1	117.451
Myo X 8 P1(2020) R2	Myo	2	HS	0	G	HS	Cs	Control	Control	4	1	86.144
Myo X 8 P1(2020) R2	Myo	2	HS	0	G	HS	Cs	Control	Control	4	1	85.545
Myo X 8 P1(2020) R2	Myo	2	HS	0	G	HS	Cs	Control	Control	4	1	67.2
Myo X 8 P1(2020) R2	Myo	2	HS	0	G	HS	Cs	Control	Control	4	1	90.929
Myo X 8 P1(2020) R2	Myo	2	HS	0	G	HS	Cs	Control	Control	4	1	116.254
Myo X 8 P1(2020) R2	Myo	2	HS	0	G	HS	Cs	Control	Control	4	1	62.015
Myo X 8 P1(2020) R2	Myo	2	HS	0	G	HS	Cs	Control	Control	4	1	110.471
Myo X 8 P1(2020) R2	Myo	2	HS	0	G	HS	Cs	Control	Control	4	1	56.233
Myo X 8 P1(2020) R2	Myo	2	HS	0	G	HS	Cs	Control	Control	4	1	128.019
Myo X 8 P1(2020) R2	Myo	2	HS	0	G	HS	Cs	Control	Control	4	1	114.459
Myo X 8 P1(2020) R2	Myo	2	HS	0	G	HS	Cs	Control	Control	4	1	143.573
Myo X 8 P1(2020) R2	Myo	2	HS	0	G	HS	Cs	Control	Control	4	1	68.596
Myo X 8 P1(2020) R2	Myo	2	HS	0	G	HS	Cs	Control	Control	4	1	111.269
Myo X 8 P1(2020) R2	Myo	2	HS	0	G	HS	Cs	Control	Control	4	1	139.186
Myo X 8 P1(2020) R2	Myo	2	HS	0	G	HS	Cs	Control	Control	4	1	175.677
Myo X 8 P1(2020) R2	Myo	2	HS	0	G	HS	Cs	Control	Control	4	1	120.641
Myo X 8 P1(2020) R2	Myo	2	HS	0	G	HS	Cs	Control	Control	4	1	105.287
Myo X 8 P1(2020) R2	Myo	2	HS	0	G	HS	Cs	Control	Control	4	1	116.454
Myo X 8 P1(2020) R2	Myo	2	HS	0	G	HS	Cs	Control	Control	4	1	92.724
Myo X 8 P1(2020) R2	Myo	2	HS	0	G	HS	Cs	Control	Control	4	1	127.022
Myo X 8 P1(2020) R2	Myo	2	HS	0	G	HS	Cs	Control	Control	4	1	159.924
Myo X 8 P1(2020) R2	Myo	2	HS	0	G	HS	Cs	Control	Control	4	2	136.594
Myo X 8 P1(2020) R2	Myo	2	HS	0	G	HS	Cs	Control	Control	4	2	69.394
Myo X 8 P1(2020) R2	Myo	2	HS	0	G	HS	Cs	Control	Control	4	2	68.596
Myo X 8 P1(2020) R2	Myo	2	HS	0	G	HS	Cs	Control	Control	4	2	59.224
Myo X 8 P1(2020) R2	Myo	2	HS	0	G	HS	Cs	Control	Control	4	2	71.786
Myo X 8 P1(2020) R2	Myo	2	HS	0	G	HS	Cs	Control	Control	4	2	83.153
Myo X 8 P1(2020) R2	Myo	2	HS	0	G	HS	Cs	Control	Control	4	2	113.662
Myo X 8 P1(2020) R2	Myo	2	HS	0	G	HS	Cs	Control	Control	4	2	156.135
Myo X 8 P1(2020) R2	Myo	2	HS	0	G	HS	Cs	Control	Control	4	2	77.569
Myo X 8 P1(2020) R2	Myo	2	HS	0	G	HS	Cs	Control	Control	4	2	88.337
Myo X 8 P1(2020) R2	Myo	2	HS	0	G	HS	Cs	Control	Control	4	2	62.414
Myo X 8 P1(2020) R2	Myo	2	HS	0	G	HS	Cs	Control	Control	4	2	104.888
Myo X 8 P1(2020) R2	Myo	2	HS	0	G	HS	Cs	Control	Control	4	2	80.76
Myo X 8 P1(2020) R2	Myo	2	HS	0	G	HS	Cs	Control	Control	4	2	124.031
Myo X 8 P1(2020) R2	Myo	2	HS	0	G	HS	Cs	Control	Control	4	2	104.489
Myo X 8 P1(2020) R2	Myo	2	HS	0	G	HS	Cs	Control	Control	4	2	98.308
Myo X 8 P1(2020) R2	Myo	2	HS	0	G	HS	Cs	Control	Control	4	2	132.805
Myo X 8 P1(2020) R2	Myo	2	HS	0	G	HS	Cs	Control	Control	4	2	82.156
Myo X 8 P1(2020) R2	Myo	2	HS	0	G	HS	Cs	Control	Control	4	2	77.37
Myo X 8 P1(2020) R2	Myo	2	HS	0	G	HS	Cs	Control	Control	4	2	39.483
Myo X 8 P1(2020) R2	Myo	2	HS	0	G	HS	Cs	Control	Control	4	2	47.259
Myo X 8 P1(2020) R2	Myo	2	HS	0	G	HS	Cs	Control	Control	4	2	94.319
Myo X 8 P1(2020) R2	Myo	2	HS	0	G	HS	Cs	Control	Control	4	2	79.364
Myo X 8 P1(2020) R2	Myo	2	HS	0	G	HS	Cs	Control	Control	4	2	86.343
Myo X 8 P1(2020) R2	Myo	2	HS	0	G	HS	Cs	Control	Control	4	2	96.912
Myo X 8 P1(2020) R2	Myo	2	HS	0	G	HS	Cs	Control	Control	4	2	77.37
Myo X 8 P1(2020) R2	Myo	2	HS	0	G	HS	Cs	Control	Control	4	2	106.483
Myo X 8 P1(2020) R2	Myo	2	HS	0	G	HS	Cs	Control	Control	4	2	79.364
Myo X 8 P1(2020) R2	Myo	2	HS	0	G	HS	Cs	Control	Control	4	2	142.775
Myo X 8 P1(2020) R2	Myo	2	HS	0	G	HS	Cs	Control	Control	4	2	113.662
Myo X 8 P1(2020) R2	Myo	2	HS	0	G	HS	Cs	Control	Control	4	3	105.686
Myo X 8 P1(2020) R2	Myo	2	HS	0	G	HS	Cs	Control	Control	4	3	100.7
Myo X 8 P1(2020) R2	Myo	2	HS	0	G	HS	Cs	Control	Control	4	3	127.82
Myo X 8 P1(2020) R2	Myo	2	HS	0	G	HS	Cs	Control	Control	4	3	98.308
Myo X 8 P1(2020) R2	Myo	2	HS	0	G	HS	Cs	Control	Control	4	3	65.206
Myo X 8 P1(2020) R2	Myo	2	HS	0	G	HS	Cs	Control	Control	4	3	67.599
Myo X 8 P1(2020) R2	Myo	2	HS	0	G	HS	Cs	Control	Control	4	3	91.927
Myo X 8 P1(2020) R2	Myo	2	HS	0	G	HS	Cs	Control	Control	4	3	145.567
Myo X 8 P1(2020) R2	Myo	2	HS	0	G	HS	Cs	Control	Control	4	3	89.733
Myo X 8 P1(2020) R2	Myo	2	HS	0	G	HS	Cs	Control	Control	4	3	70.391
Myo X 8 P1(2020) R2	Myo	2	HS	0	G	HS	Cs	Control	Control	4	3	72.385
Myo X 8 P1(2020) R2	Myo	2	HS	0	G	HS	Cs	Control	Control	4	3	72.783
Myo X 8 P1(2020) R2	Myo	2	HS	0	G	HS	Cs	Control	Control	4	3	93.721
Myo X 8 P1(2020) R2	Myo	2	HS	0	G	HS	Cs	Control	Control	4	3	79.962
Myo X 8 P1(2020) R2	Myo	2	HS	0	G	HS	Cs	Control	Control	4	3	70.789
Myo X 8 P1(2020) R2	Myo	2	HS	0	G	HS	Cs	Control	Control	4	3	145.168
Myo X 8 P1(2020) R2	Myo	2	HS	0	G	HS	Cs	Control	Control	4	3	127.022
Myo X 8 P1(2020) R2	Myo	2	HS	0	G	HS	Cs	Control	Control	4	3	126.424
Myo X 8 P1(2020) R2	Myo	2	HS	0	G	HS	Cs	Control	Control	4	3	132.207
Myo X 8 P1(2020) R2	Myo	2	HS	0	G	HS	Cs	Control	Control	4	3	100.9
Myo X 8 P1(2020) R2	Myo	2	HS	0	G	HS	Cs	Control	Control	4	3	133.403
Myo X 8 P1(2020) R2	Myo	2	HS	0	G	HS	Cs	Control	Control	4	3	72.783
Myo X 8 P1(2020) R2	Myo	2	HS	0	G	HS	Cs	Control	Control	4	3	59.623
Myo X 8 P1(2020) R2	Myo	2	HS	0	G	HS	Cs	Control	Control	4	3	65.804
Myo X 8 P1(2020) R2	Myo	2	HS	0	G	HS	Cs	Control	Control	4	3	74.578
Myo X 8 P1(2020) R2	Myo	2	HS	0	G	HS	Cs	Control	Control	4	3	96.114
Myo X 8 P1(2020) R2	Myo	2	HS	0	G	HS	Cs	Control	Control	4	3	91.129
Myo X 8 P1(2020) R2	Myo	2	HS	0	G	HS	Cs	Control	Control	4	3	108.278
Myo X 8 P1(2020) R2	Myo	2	HS	0	G	HS	Cs	Control	Control	4	3	101.299
Myo X 8 P1(2020) R2	Myo	2	HS	0	G	HS	Cs	Control	Control	4	3	91.129
Myo X 8 P1(2020) R2	Myo	2	HS	0	G	HS	Cs	Control	Control	4	4	61.218
Myo X 8 P1(2020) R2	Myo	2	HS	0	G	HS	Cs	Control	Control	4	4	106.683
Myo X 8 P1(2020) R2	Myo	2	HS	0	G	HS	Cs	Control	Control	4	4	67.399
Myo X 8 P1(2020) R2	Myo	2	HS	0	G	HS	Cs	Control	Control	4	4	62.813
Myo X 8 P1(2020) R2	Myo	2	HS	0	G	HS	Cs	Control	Control	4	4	86.742
Myo X 8 P1(2020) R2	Myo	2	HS	0	G	HS	Cs	Control	Control	4	4	68.596
Myo X 8 P1(2020) R2	Myo	2	HS	0	G	HS	Cs	Control	Control	4	4	70.391
Myo X 8 P1(2020) R2	Myo	2	HS	0	G	HS	Cs	Control	Control	4	4	81.956
Myo X 8 P1(2020) R2	Myo	2	HS	0	G	HS	Cs	Control	Control	4	4	65.405
Myo X 8 P1(2020) R2	Myo	2	HS	0	G	HS	Cs	Control	Control	4	4	97.31
Myo X 8 P1(2020) R2	Myo	2	HS	0	G	HS	Cs	Control	Control	4	4	97.31
Myo X 8 P1(2020) R2	Myo	2	HS	0	G	HS	Cs	Control	Control	4	4	75.974
Myo X 8 P1(2020) R2	Myo	2	HS	0	G	HS	Cs	Control	Control	4	4	91.927
Myo X 8 P1(2020) R2	Myo	2	HS	0	G	HS	Cs	Control	Control	4	4	74.179
Myo X 8 P1(2020) R2	Myo	2	HS	0	G	HS	Cs	Control	Control	4	4	110.87
Myo X 8 P1(2020) R2	Myo	2	HS	0	G	HS	Cs	Control	Control	4	4	97.111
Myo X 8 P1(2020) R2	Myo	2	HS	0	G	HS	Cs	Control	Control	4	4	79.563
Myo X 8 P1(2020) R2	Myo	2	HS	0	G	HS	Cs	Control	Control	4	4	72.385
Myo X 8 P1(2020) R2	Myo	2	HS	0	G	HS	Cs	Control	Control	4	4	107.68
Myo X 8 P1(2020) R2	Myo	2	HS	0	G	HS	Cs	Control	Control	4	4	127.82
Myo X 8 P1(2020) R2	Myo	2	HS	0	G	HS	Cs	Control	Control	4	4	108.677
Myo X 8 P1(2020) R2	Myo	2	HS	0	G	HS	Cs	Control	Control	4	4	71.786
Myo X 8 P1(2020) R2	Myo	2	HS	0	G	HS	Cs	Control	Control	4	4	67.001
Myo X 8 P1(2020) R2	Myo	2	HS	0	G	HS	Cs	Control	Control	4	4	68.995
Myo X 8 P1(2020) R2	Myo	2	HS	0	G	HS	Cs	Control	Control	4	4	61.218
Myo X 8 P1(2020) R2	Myo	2	HS	0	G	HS	Cs	Control	Control	4	4	62.015
Myo X 8 P1(2020) R2	Myo	2	HS	0	G	HS	Cs	Control	Control	4	4	68.995
Myo X 8 P1(2020) R2	Myo	2	HS	0	G	HS	Cs	Control	Control	4	4	51.248
Myo X 8 P1(2020) R2	Myo	2	HS	0	G	HS	Cs	Control	Control	4	4	54.039
Myo X 8 P1(2020) R2	Myo	2	HS	0	G	HS	Cs	Control	Control	4	4	84.548
Myo X 8 P1(2020) R2	Myo	2	HS	0	G	HS	Cs	Control	Control	4	5	90.331
Myo X 8 P1(2020) R2	Myo	2	HS	0	G	HS	Cs	Control	Control	4	5	128.817
Myo X 8 P1(2020) R2	Myo	2	HS	0	G	HS	Cs	Control	Control	4	5	66.602
Myo X 8 P1(2020) R2	Myo	2	HS	0	G	HS	Cs	Control	Control	4	5	65.605
Myo X 8 P1(2020) R2	Myo	2	HS	0	G	HS	Cs	Control	Control	4	5	80.76
Myo X 8 P1(2020) R2	Myo	2	HS	0	G	HS	Cs	Control	Control	4	5	39.084
Myo X 8 P1(2020) R2	Myo	2	HS	0	G	HS	Cs	Control	Control	4	5	67.798
Myo X 8 P1(2020) R2	Myo	2	HS	0	G	HS	Cs	Control	Control	4	5	75.974
Myo X 8 P1(2020) R2	Myo	2	HS	0	G	HS	Cs	Control	Control	4	5	57.429
Myo X 8 P1(2020) R2	Myo	2	HS	0	G	HS	Cs	Control	Control	4	5	35.295
Myo X 8 P1(2020) R2	Myo	2	HS	0	G	HS	Cs	Control	Control	4	5	68.995
Myo X 8 P1(2020) R2	Myo	2	HS	0	G	HS	Cs	Control	Control	4	5	122.835
Myo X 8 P1(2020) R2	Myo	2	HS	0	G	HS	Cs	Control	Control	4	5	126.424
Myo X 8 P1(2020) R2	Myo	2	HS	0	G	HS	Cs	Control	Control	4	5	116.055
Myo X 8 P1(2020) R2	Myo	2	HS	0	G	HS	Cs	Control	Control	4	5	70.59
Myo X 8 P1(2020) R2	Myo	2	HS	0	G	HS	Cs	Control	Control	4	5	84.748
Myo X 8 P1(2020) R2	Myo	2	HS	0	G	HS	Cs	Control	Control	4	5	122.236
Myo X 8 P1(2020) R2	Myo	2	HS	0	G	HS	Cs	Control	Control	4	5	145.168
Myo X 8 P1(2020) R2	Myo	2	HS	0	G	HS	Cs	Control	Control	4	5	107.48
Myo X 8 P1(2020) R2	Myo	2	HS	0	G	HS	Cs	Control	Control	4	5	83.153
Myo X 8 P1(2020) R2	Myo	2	HS	0	G	HS	Cs	Control	Control	4	5	59.623
Myo X 8 P1(2020) R2	Myo	2	HS	0	G	HS	Cs	Control	Control	4	5	74.379
Myo X 8 P1(2020) R2	Myo	2	HS	0	G	HS	Cs	Control	Control	4	5	92.924
Myo X 8 P1(2020) R2	Myo	2	HS	0	G	HS	Cs	Control	Control	4	5	66.004
Myo X 8 P1(2020) R2	Myo	2	HS	0	G	HS	Cs	Control	Control	4	5	82.554
Myo X 8 P1(2020) R2	Myo	2	HS	0	G	HS	Cs	Control	Control	4	5	86.343
Myo X 8 P1(2020) R2	Myo	2	HS	0	G	HS	Cs	Control	Control	4	5	100.7
Myo X 8 P1(2020) R2	Myo	2	HS	0	G	HS	Cs	Control	Control	4	5	89.334
Myo X 8 P1(2020) R2	Myo	2	HS	0	G	HS	Cs	Control	Control	4	5	189.038
Myo X 8 P1(2020) R2	Myo	2	HS	0	G	HS	Cs	Control	Control	4	5	71.587
Myo X 8 P1(2020) R2	Myo	2	HS	0	G	HS	Cs	Control	Control	4	6	170.493
Myo X 8 P1(2020) R2	Myo	2	HS	0	G	HS	Cs	Control	Control	4	6	100.9
Myo X 8 P1(2020) R2	Myo	2	HS	0	G	HS	Cs	Control	Control	4	6	63.013
Myo X 8 P1(2020) R2	Myo	2	HS	0	G	HS	Cs	Control	Control	4	6	79.763
Myo X 8 P1(2020) R2	Myo	2	HS	0	G	HS	Cs	Control	Control	4	6	66.203
Myo X 8 P1(2020) R2	Myo	2	HS	0	G	HS	Cs	Control	Control	4	6	156.135
Myo X 8 P1(2020) R2	Myo	2	HS	0	G	HS	Cs	Control	Control	4	6	87.739
Myo X 8 P1(2020) R2	Myo	2	HS	0	G	HS	Cs	Control	Control	4	6	116.055
Myo X 8 P1(2020) R2	Myo	2	HS	0	G	HS	Cs	Control	Control	4	6	112.465
Myo X 8 P1(2020) R2	Myo	2	HS	0	G	HS	Cs	Control	Control	4	6	133.403
Myo X 8 P1(2020) R2	Myo	2	HS	0	G	HS	Cs	Control	Control	4	6	85.545
Myo X 8 P1(2020) R2	Myo	2	HS	0	G	HS	Cs	Control	Control	4	6	47.858
Myo X 8 P1(2020) R2	Myo	2	HS	0	G	HS	Cs	Control	Control	4	6	104.29
Myo X 8 P1(2020) R2	Myo	2	HS	0	G	HS	Cs	Control	Control	4	6	108.876
Myo X 8 P1(2020) R2	Myo	2	HS	0	G	HS	Cs	Control	Control	4	6	105.885
Myo X 8 P1(2020) R2	Myo	2	HS	0	G	HS	Cs	Control	Control	4	6	140.582
Myo X 8 P1(2020) R2	Myo	2	HS	0	G	HS	Cs	Control	Control	4	6	80.361
Myo X 8 P1(2020) R2	Myo	2	HS	0	G	HS	Cs	Control	Control	4	6	85.944
Myo X 8 P1(2020) R2	Myo	2	HS	0	G	HS	Cs	Control	Control	4	6	99.305
Myo X 8 P1(2020) R2	Myo	2	HS	0	G	HS	Cs	Control	Control	4	6	81.159
Myo X 8 P1(2020) R2	Myo	2	HS	0	G	HS	Cs	Control	Control	4	6	99.903
Myo X 8 P1(2020) R2	Myo	2	HS	0	G	HS	Cs	Control	Control	4	6	84.548
Myo X 8 P1(2020) R2	Myo	2	HS	0	G	HS	Cs	Control	Control	4	6	111.468
Myo X 8 P1(2020) R2	Myo	2	HS	0	G	HS	Cs	Control	Control	4	6	84.548
Myo X 8 P1(2020) R2	Myo	2	HS	0	G	HS	Cs	Control	Control	4	6	84.349
Myo X 8 P1(2020) R2	Myo	2	HS	0	G	HS	Cs	Control	Control	4	6	76.772
Myo X 8 P1(2020) R2	Myo	2	HS	0	G	HS	Cs	Control	Control	4	6	89.135
Myo X 8 P1(2020) R2	Myo	2	HS	0	G	HS	Cs	Control	Control	4	6	70.191
Myo X 8 P1(2020) R2	Myo	2	HS	0	G	HS	Cs	Control	Control	4	6	79.164
Myo X 8 P1(2020) R2	Myo	2	HS	0	G	HS	Cs	Control	Control	4	6	89.733
Myo X 8 P1(2020) R2	Myo	2	HS	0	G	HS	Cs	Control	Control	4	7	92.924
Myo X 8 P1(2020) R2	Myo	2	HS	0	G	HS	Cs	Control	Control	4	7	80.361
Myo X 8 P1(2020) R2	Myo	2	HS	0	G	HS	Cs	Control	Control	4	7	117.849
Myo X 8 P1(2020) R2	Myo	2	HS	0	G	HS	Cs	Control	Control	4	7	116.653
Myo X 8 P1(2020) R2	Myo	2	HS	0	G	HS	Cs	Control	Control	4	7	106.683
Myo X 8 P1(2020) R2	Myo	2	HS	0	G	HS	Cs	Control	Control	4	7	96.912
Myo X 8 P1(2020) R2	Myo	2	HS	0	G	HS	Cs	Control	Control	4	7	134.998
Myo X 8 P1(2020) R2	Myo	2	HS	0	G	HS	Cs	Control	Control	4	7	106.284
Myo X 8 P1(2020) R2	Myo	2	HS	0	G	HS	Cs	Control	Control	4	7	146.963
Myo X 8 P1(2020) R2	Myo	2	HS	0	G	HS	Cs	Control	Control	4	7	113.462
Myo X 8 P1(2020) R2	Myo	2	HS	0	G	HS	Cs	Control	Control	4	7	81.358
Myo X 8 P1(2020) R2	Myo	2	HS	0	G	HS	Cs	Control	Control	4	7	76.373
Myo X 8 P1(2020) R2	Myo	2	HS	0	G	HS	Cs	Control	Control	4	7	151.15
Myo X 8 P1(2020) R2	Myo	2	HS	0	G	HS	Cs	Control	Control	4	7	90.73
Myo X 8 P1(2020) R2	Myo	2	HS	0	G	HS	Cs	Control	Control	4	7	99.504
Myo X 8 P1(2020) R2	Myo	2	HS	0	G	HS	Cs	Control	Control	4	7	85.745
Myo X 8 P1(2020) R2	Myo	2	HS	0	G	HS	Cs	Control	Control	4	7	60.62
Myo X 8 P1(2020) R2	Myo	2	HS	0	G	HS	Cs	Control	Control	4	7	61.617
Myo X 8 P1(2020) R2	Myo	2	HS	0	G	HS	Cs	Control	Control	4	7	97.31
Myo X 8 P1(2020) R2	Myo	2	HS	0	G	HS	Cs	Control	Control	4	7	112.665
Myo X 8 P1(2020) R2	Myo	2	HS	0	G	HS	Cs	Control	Control	4	7	60.42
Myo X 8 P1(2020) R2	Myo	2	HS	0	G	HS	Cs	Control	Control	4	7	119.046
Myo X 8 P1(2020) R2	Myo	2	HS	0	G	HS	Cs	Control	Control	4	7	51.248
Myo X 8 P1(2020) R2	Myo	2	HS	0	G	HS	Cs	Control	Control	4	7	112.465
Myo X 8 P1(2020) R2	Myo	2	HS	0	G	HS	Cs	Control	Control	4	7	98.706
Myo X 8 P1(2020) R2	Myo	2	HS	0	G	HS	Cs	Control	Control	4	7	77.37
Myo X 8 P1(2020) R2	Myo	2	HS	0	G	HS	Cs	Control	Control	4	7	64.01
Myo X 8 P1(2020) R2	Myo	2	HS	0	G	HS	Cs	Control	Control	4	7	121.838
Myo X 8 P1(2020) R2	Myo	2	HS	0	G	HS	Cs	Control	Control	4	7	120.641
Myo X 8 P1(2020) R2	Myo	2	HS	0	G	HS	Cs	Control	Control	4	7	96.712
Myo X 3 P1 R2	Myo	3	HS	0	G	HS	34639	Tor-IR	Tor	4	1	90.531
Myo X 3 P1 R2	Myo	3	HS	0	G	HS	34639	Tor-IR	Tor	4	1	63.212
Myo X 3 P1 R2	Myo	3	HS	0	G	HS	34639	Tor-IR	Tor	4	1	73.98
Myo X 3 P1 R2	Myo	3	HS	0	G	HS	34639	Tor-IR	Tor	4	1	41.676
Myo X 3 P1 R2	Myo	3	HS	0	G	HS	34639	Tor-IR	Tor	4	1	51.646
Myo X 3 P1 R2	Myo	3	HS	0	G	HS	34639	Tor-IR	Tor	4	1	48.456
Myo X 3 P1 R2	Myo	3	HS	0	G	HS	34639	Tor-IR	Tor	4	1	38.286
Myo X 3 P1 R2	Myo	3	HS	0	G	HS	34639	Tor-IR	Tor	4	1	55.435
Myo X 3 P1 R2	Myo	3	HS	0	G	HS	34639	Tor-IR	Tor	4	1	90.929
Myo X 3 P1 R2	Myo	3	HS	0	G	HS	34639	Tor-IR	Tor	4	1	68.795
Myo X 3 P1 R2	Myo	3	HS	0	G	HS	34639	Tor-IR	Tor	4	1	55.634
Myo X 3 P1 R2	Myo	3	HS	0	G	HS	34639	Tor-IR	Tor	4	1	66.004
Myo X 3 P1 R2	Myo	3	HS	0	G	HS	34639	Tor-IR	Tor	4	1	51.447
Myo X 3 P1 R2	Myo	3	HS	0	G	HS	34639	Tor-IR	Tor	4	1	30.509
Myo X 3 P1 R2	Myo	3	HS	0	G	HS	34639	Tor-IR	Tor	4	1	35.096
Myo X 3 P1 R2	Myo	3	HS	0	G	HS	34639	Tor-IR	Tor	4	1	67.001
Myo X 3 P1 R2	Myo	3	HS	0	G	HS	34639	Tor-IR	Tor	4	1	104.09
Myo X 3 P1 R2	Myo	3	HS	0	G	HS	34639	Tor-IR	Tor	4	1	38.485
Myo X 3 P1 R2	Myo	3	HS	0	G	HS	34639	Tor-IR	Tor	4	1	62.614
Myo X 3 P1 R2	Myo	3	HS	0	G	HS	34639	Tor-IR	Tor	4	1	59.024
Myo X 3 P1 R2	Myo	3	HS	0	G	HS	34639	Tor-IR	Tor	4	2	79.962
Myo X 3 P1 R2	Myo	3	HS	0	G	HS	34639	Tor-IR	Tor	4	2	57.629
Myo X 3 P1 R2	Myo	3	HS	0	G	HS	34639	Tor-IR	Tor	4	2	63.212
Myo X 3 P1 R2	Myo	3	HS	0	G	HS	34639	Tor-IR	Tor	4	2	62.414
Myo X 3 P1 R2	Myo	3	HS	0	G	HS	34639	Tor-IR	Tor	4	2	42.075
Myo X 3 P1 R2	Myo	3	HS	0	G	HS	34639	Tor-IR	Tor	4	2	32.304
Myo X 3 P1 R2	Myo	3	HS	0	G	HS	34639	Tor-IR	Tor	4	2	58.227
Myo X 3 P1 R2	Myo	3	HS	0	G	HS	34639	Tor-IR	Tor	4	2	49.453
Myo X 3 P1 R2	Myo	3	HS	0	G	HS	34639	Tor-IR	Tor	4	2	53.84
Myo X 3 P1 R2	Myo	3	HS	0	G	HS	34639	Tor-IR	Tor	4	2	41.676
Myo X 3 P1 R2	Myo	3	HS	0	G	HS	34639	Tor-IR	Tor	4	2	58.227
Myo X 3 P1 R2	Myo	3	HS	0	G	HS	34639	Tor-IR	Tor	4	2	49.453
Myo X 3 P1 R2	Myo	3	HS	0	G	HS	34639	Tor-IR	Tor	4	2	45.066
Myo X 3 P1 R2	Myo	3	HS	0	G	HS	34639	Tor-IR	Tor	4	2	43.67
Myo X 3 P1 R2	Myo	3	HS	0	G	HS	34639	Tor-IR	Tor	4	2	64.209
Myo X 3 P1 R2	Myo	3	HS	0	G	HS	34639	Tor-IR	Tor	4	2	57.828
Myo X 3 P1 R2	Myo	3	HS	0	G	HS	34639	Tor-IR	Tor	4	2	77.968
Myo X 3 P1 R2	Myo	3	HS	0	G	HS	34639	Tor-IR	Tor	4	2	38.685
Myo X 3 P1 R2	Myo	3	HS	0	G	HS	34639	Tor-IR	Tor	4	2	76.772
Myo X 3 P1 R2	Myo	3	HS	0	G	HS	34639	Tor-IR	Tor	4	2	83.95
Myo X 3 P1 R2	Myo	3	HS	0	G	HS	34639	Tor-IR	Tor	4	2	47.858
Myo X 3 P1 R2	Myo	3	HS	0	G	HS	34639	Tor-IR	Tor	4	2	57.629
Myo X 3 P1 R2	Myo	3	HS	0	G	HS	34639	Tor-IR	Tor	4	2	47.259
Myo X 3 P1 R2	Myo	3	HS	0	G	HS	34639	Tor-IR	Tor	4	2	50.849
Myo X 3 P1 R2	Myo	3	HS	0	G	HS	34639	Tor-IR	Tor	4	2	73.581
Myo X 3 P1 R2	Myo	3	HS	0	G	HS	34639	Tor-IR	Tor	4	2	57.23
Myo X 3 P1 R2	Myo	3	HS	0	G	HS	34639	Tor-IR	Tor	4	2	59.623
Myo X 3 P1 R2	Myo	3	HS	0	G	HS	34639	Tor-IR	Tor	4	2	52.245
Myo X 3 P1 R2	Myo	3	HS	0	G	HS	34639	Tor-IR	Tor	4	2	74.977
Myo X 3 P1 R2	Myo	3	HS	0	G	HS	34639	Tor-IR	Tor	4	3	172.686
Myo X 3 P1 R2	Myo	3	HS	0	G	HS	34639	Tor-IR	Tor	4	3	142.576
Myo X 3 P1 R2	Myo	3	HS	0	G	HS	34639	Tor-IR	Tor	4	3	130.811
Myo X 3 P1 R2	Myo	3	HS	0	G	HS	34639	Tor-IR	Tor	4	3	84.947
Myo X 3 P1 R2	Myo	3	HS	0	G	HS	34639	Tor-IR	Tor	4	3	112.465
Myo X 3 P1 R2	Myo	3	HS	0	G	HS	34639	Tor-IR	Tor	4	3	201.401
Myo X 3 P1 R2	Myo	3	HS	0	G	HS	34639	Tor-IR	Tor	4	3	251.452
Myo X 3 P1 R2	Myo	3	HS	0	G	HS	34639	Tor-IR	Tor	4	3	84.748
Myo X 3 P1 R2	Myo	3	HS	0	G	HS	34639	Tor-IR	Tor	4	3	92.325
Myo X 3 P1 R2	Myo	3	HS	0	G	HS	34639	Tor-IR	Tor	4	3	142.775
Myo X 3 P1 R2	Myo	3	HS	0	G	HS	34639	Tor-IR	Tor	4	3	87.54
Myo X 3 P1 R2	Myo	3	HS	0	G	HS	34639	Tor-IR	Tor	4	3	163.115
Myo X 3 P1 R2	Myo	3	HS	0	G	HS	34639	Tor-IR	Tor	4	3	117.451
Myo X 3 P1 R2	Myo	3	HS	0	G	HS	34639	Tor-IR	Tor	4	3	139.784
Myo X 3 P1 R2	Myo	3	HS	0	G	HS	34639	Tor-IR	Tor	4	3	187.642
Myo X 3 P1 R2	Myo	3	HS	0	G	HS	34639	Tor-IR	Tor	4	4	113.662
Myo X 3 P1 R2	Myo	3	HS	0	G	HS	34639	Tor-IR	Tor	4	4	103.691
Myo X 3 P1 R2	Myo	3	HS	0	G	HS	34639	Tor-IR	Tor	4	4	88.337
Myo X 3 P1 R2	Myo	3	HS	0	G	HS	34639	Tor-IR	Tor	4	4	63.611
Myo X 3 P1 R2	Myo	3	HS	0	G	HS	34639	Tor-IR	Tor	4	4	103.891
Myo X 3 P1 R2	Myo	3	HS	0	G	HS	34639	Tor-IR	Tor	4	4	105.885
Myo X 3 P1 R2	Myo	3	HS	0	G	HS	34639	Tor-IR	Tor	4	4	99.105
Myo X 3 P1 R2	Myo	3	HS	0	G	HS	34639	Tor-IR	Tor	4	4	53.64
Myo X 3 P1 R2	Myo	3	HS	0	G	HS	34639	Tor-IR	Tor	4	4	116.055
Myo X 3 P1 R2	Myo	3	HS	0	G	HS	34639	Tor-IR	Tor	4	4	190.433
Myo X 3 P1 R2	Myo	3	HS	0	G	HS	34639	Tor-IR	Tor	4	4	112.266
Myo X 3 P1 R2	Myo	3	HS	0	G	HS	34639	Tor-IR	Tor	4	4	140.382
Myo X 3 P1 R2	Myo	3	HS	0	G	HS	34639	Tor-IR	Tor	4	4	134.201
Myo X 3 P1 R2	Myo	3	HS	0	G	HS	34639	Tor-IR	Tor	4	4	74.379
Myo X 3 P1 R2	Myo	3	HS	0	G	HS	34639	Tor-IR	Tor	4	4	73.382
Myo X 3 P1 R2	Myo	3	HS	0	G	HS	34639	Tor-IR	Tor	4	4	86.343
Myo X 3 P1 R2	Myo	3	HS	0	G	HS	34639	Tor-IR	Tor	4	4	102.096
Myo X 3 P1 R2	Myo	3	HS	0	G	HS	34639	Tor-IR	Tor	4	4	87.938
Myo X 3 P1 R2	Myo	3	HS	0	G	HS	34639	Tor-IR	Tor	4	4	136.195
Myo X 3 P1 R2	Myo	3	HS	0	G	HS	34639	Tor-IR	Tor	4	4	120.242
Myo X 3 P1 R2	Myo	3	HS	0	G	HS	34639	Tor-IR	Tor	4	5	78.965
Myo X 3 P1 R2	Myo	3	HS	0	G	HS	34639	Tor-IR	Tor	4	5	80.162
Myo X 3 P1 R2	Myo	3	HS	0	G	HS	34639	Tor-IR	Tor	4	5	76.772
Myo X 3 P1 R2	Myo	3	HS	0	G	HS	34639	Tor-IR	Tor	4	5	74.778
Myo X 3 P1 R2	Myo	3	HS	0	G	HS	34639	Tor-IR	Tor	4	5	60.819
Myo X 3 P1 R2	Myo	3	HS	0	G	HS	34639	Tor-IR	Tor	4	5	64.608
Myo X 3 P1 R2	Myo	3	HS	0	G	HS	34639	Tor-IR	Tor	4	5	60.221
Myo X 3 P1 R2	Myo	3	HS	0	G	HS	34639	Tor-IR	Tor	4	5	43.869
Myo X 3 P1 R2	Myo	3	HS	0	G	HS	34639	Tor-IR	Tor	4	5	54.239
Myo X 3 P1 R2	Myo	3	HS	0	G	HS	34639	Tor-IR	Tor	4	5	62.813
Myo X 3 P1 R2	Myo	3	HS	0	G	HS	34639	Tor-IR	Tor	4	5	73.182
Myo X 3 P1 R2	Myo	3	HS	0	G	HS	34639	Tor-IR	Tor	4	5	78.367
Myo X 3 P1 R2	Myo	3	HS	0	G	HS	34639	Tor-IR	Tor	4	5	80.56
Myo X 3 P1 R2	Myo	3	HS	0	G	HS	34639	Tor-IR	Tor	4	6	85.147
Myo X 3 P1 R2	Myo	3	HS	0	G	HS	34639	Tor-IR	Tor	4	6	77.769
Myo X 3 P1 R2	Myo	3	HS	0	G	HS	34639	Tor-IR	Tor	4	6	81.358
Myo X 3 P1 R2	Myo	3	HS	0	G	HS	34639	Tor-IR	Tor	4	6	165.308
Myo X 3 P1 R2	Myo	3	HS	0	G	HS	34639	Tor-IR	Tor	4	6	204.99
Myo X 3 P1 R2	Myo	3	HS	0	G	HS	34639	Tor-IR	Tor	4	6	169.695
Myo X 3 P1 R2	Myo	3	HS	0	G	HS	34639	Tor-IR	Tor	4	6	170.293
Myo X 3 P1 R2	Myo	3	HS	0	G	HS	34639	Tor-IR	Tor	4	6	211.172
Myo X 3 P1 R2	Myo	3	HS	0	G	HS	34639	Tor-IR	Tor	4	6	81.358
Myo X 3 P1 R2	Myo	3	HS	0	G	HS	34639	Tor-IR	Tor	4	6	208.579
Myo X 3 P1 R2	Myo	3	HS	0	G	HS	34639	Tor-IR	Tor	4	6	177.472
Myo X 3 P1 R2	Myo	3	HS	0	G	HS	34639	Tor-IR	Tor	4	6	146.763
Myo X 3 P1 R2	Myo	3	HS	0	G	HS	34639	Tor-IR	Tor	4	6	210.574
Myo X 3 P1 R2	Myo	3	HS	0	G	HS	34639	Tor-IR	Tor	4	7	77.769
Myo X 3 P1 R2	Myo	3	HS	0	G	HS	34639	Tor-IR	Tor	4	7	62.614
Myo X 3 P1 R2	Myo	3	HS	0	G	HS	34639	Tor-IR	Tor	4	7	67.2
Myo X 3 P1 R2	Myo	3	HS	0	G	HS	34639	Tor-IR	Tor	4	7	58.027
Myo X 3 P1 R2	Myo	3	HS	0	G	HS	34639	Tor-IR	Tor	4	7	68.596
Myo X 3 P1 R2	Myo	3	HS	0	G	HS	34639	Tor-IR	Tor	4	7	58.426
Myo X 3 P1 R2	Myo	3	HS	0	G	HS	34639	Tor-IR	Tor	4	7	60.62
Myo X 3 P1 R2	Myo	3	HS	0	G	HS	34639	Tor-IR	Tor	4	7	69.792
Myo X 3 P1 R2	Myo	3	HS	0	G	HS	34639	Tor-IR	Tor	4	7	78.167
Myo X 3 P1 R2	Myo	3	HS	0	G	HS	34639	Tor-IR	Tor	4	7	47.658
Myo X 3 P1 R2	Myo	3	HS	0	G	HS	34639	Tor-IR	Tor	4	7	43.471
Myo X 3 P1 R2	Myo	3	HS	0	G	HS	34639	Tor-IR	Tor	4	7	52.643
Myo X 3 P1 R2	Myo	3	HS	0	G	HS	34639	Tor-IR	Tor	4	7	46.661
Myo X 3 P1 R2	Myo	3	HS	0	G	HS	34639	Tor-IR	Tor	4	7	32.104
Myo X 3 P1 R2	Myo	3	HS	0	G	HS	34639	Tor-IR	Tor	4	7	36.691
Myo X 3 P1 R2	Myo	3	HS	0	G	HS	34639	Tor-IR	Tor	4	7	48.855
Myo X 3 P1 R2	Myo	3	HS	0	G	HS	34639	Tor-IR	Tor	4	7	40.081
Myo X 3 P1 R2	Myo	3	HS	0	G	HS	34639	Tor-IR	Tor	4	7	33.5
Myo X 3 P1 R2	Myo	3	HS	0	G	HS	34639	Tor-IR	Tor	4	7	38.087
Myo X 3 P1 R2	Myo	3	HS	0	G	HS	34639	Tor-IR	Tor	4	7	31.506
Myo X 3 P1 R2	Myo	3	HS	0	G	HS	34639	Tor-IR	Tor	4	8	112.266
Myo X 3 P1 R2	Myo	3	HS	0	G	HS	34639	Tor-IR	Tor	4	8	174.481
Myo X 3 P1 R2	Myo	3	HS	0	G	HS	34639	Tor-IR	Tor	4	8	151.15
Myo X 3 P1 R2	Myo	3	HS	0	G	HS	34639	Tor-IR	Tor	4	8	68.197
Myo X 3 P1 R2	Myo	3	HS	0	G	HS	34639	Tor-IR	Tor	4	8	107.48
Myo X 3 P1 R2	Myo	3	HS	0	G	HS	34639	Tor-IR	Tor	4	8	126.224
Myo X 3 P1 R2	Myo	3	HS	0	G	HS	34639	Tor-IR	Tor	4	8	72.983
Myo X 3 P1 R2	Myo	3	HS	0	G	HS	34639	Tor-IR	Tor	4	8	262.619
Myo X 3 P1 R2	Myo	3	HS	0	G	HS	34639	Tor-IR	Tor	4	8	142.576
Myo X 3 P1 R2	Myo	3	HS	0	G	HS	34639	Tor-IR	Tor	4	8	111.867
Myo X 3 P1 R2	Myo	3	HS	0	G	HS	34639	Tor-IR	Tor	4	8	217.353
Myo X 3 P1 R2	Myo	3	HS	0	G	HS	34639	Tor-IR	Tor	4	8	169.097
Myo X 3 P1 R2	Myo	3	HS	0	G	HS	34639	Tor-IR	Tor	4	8	159.924
Myo X 3 P1 R2	Myo	3	HS	0	G	HS	34639	Tor-IR	Tor	4	8	180.862
Myo X 3 P1 R2	Myo	3	HS	0	G	HS	34639	Tor-IR	Tor	4	8	114.26
Myo X 3 P1 R2	Myo	3	HS	0	G	HS	34639	Tor-IR	Tor	4	8	72.584
Myo X 3 P1 R2	Myo	3	HS	0	G	HS	34639	Tor-IR	Tor	4	8	85.346
Myo X 3 P1 R2	Myo	3	HS	0	G	HS	34639	Tor-IR	Tor	4	8	92.325
Myo X 3 P1 R2	Myo	3	HS	0	G	HS	34639	Tor-IR	Tor	4	8	148.558
Myo X 3 P1 R2	Myo	3	HS	0	G	HS	34639	Tor-IR	Tor	4	8	147.362
Myo X 3 P1 R2	Myo	3	HStoHY	7	G	HY	34639	Tor-IR	Tor	4	1	205.389
Myo X 3 P1 R2	Myo	3	HStoHY	7	G	HY	34639	Tor-IR	Tor	4	1	310.676
Myo X 3 P1 R2	Myo	3	HStoHY	7	G	HY	34639	Tor-IR	Tor	4	1	352.551
Myo X 3 P1 R2	Myo	3	HStoHY	7	G	HY	34639	Tor-IR	Tor	4	1	236.496
Myo X 3 P1 R2	Myo	3	HStoHY	7	G	HY	34639	Tor-IR	Tor	4	1	172.287
Myo X 3 P1 R2	Myo	3	HStoHY	7	G	HY	34639	Tor-IR	Tor	4	1	341.584
Myo X 3 P1 R2	Myo	3	HStoHY	7	G	HY	34639	Tor-IR	Tor	4	1	414.965
Myo X 3 P1 R2	Myo	3	HStoHY	7	G	HY	34639	Tor-IR	Tor	4	1	291.333
Myo X 3 P1 R2	Myo	3	HStoHY	7	G	HY	34639	Tor-IR	Tor	4	1	207.582
Myo X 3 P1 R2	Myo	3	HStoHY	7	G	HY	34639	Tor-IR	Tor	4	1	230.514
Myo X 3 P1 R2	Myo	3	HStoHY	7	G	HY	34639	Tor-IR	Tor	4	1	348.962
Myo X 3 P1 R2	Myo	3	HStoHY	7	G	HY	34639	Tor-IR	Tor	4	1	306.089
Myo X 3 P1 R2	Myo	3	HStoHY	7	G	HY	34639	Tor-IR	Tor	4	1	212.767
Myo X 3 P1 R2	Myo	3	HStoHY	7	G	HY	34639	Tor-IR	Tor	4	1	167.9
Myo X 3 P1 R2	Myo	3	HStoHY	7	G	HY	34639	Tor-IR	Tor	4	1	161.121
Myo X 3 P1 R2	Myo	3	HStoHY	7	G	HY	34639	Tor-IR	Tor	4	1	150.552
Myo X 3 P1 R2	Myo	3	HStoHY	7	G	HY	34639	Tor-IR	Tor	4	1	164.511
Myo X 3 P1 R2	Myo	3	HStoHY	7	G	HY	34639	Tor-IR	Tor	4	1	202.597
Myo X 3 P1 R2	Myo	3	HStoHY	7	G	HY	34639	Tor-IR	Tor	4	1	216.755
Myo X 3 P1 R2	Myo	3	HStoHY	7	G	HY	34639	Tor-IR	Tor	4	1	176.475
Myo X 3 P1 R2	Myo	3	HStoHY	7	G	HY	34639	Tor-IR	Tor	4	1	220.544
Myo X 3 P1 R2	Myo	3	HStoHY	7	G	HY	34639	Tor-IR	Tor	4	2	339.39
Myo X 3 P1 R2	Myo	3	HStoHY	7	G	HY	34639	Tor-IR	Tor	4	2	205.588
Myo X 3 P1 R2	Myo	3	HStoHY	7	G	HY	34639	Tor-IR	Tor	4	2	171.29
Myo X 3 P1 R2	Myo	3	HStoHY	7	G	HY	34639	Tor-IR	Tor	4	2	192.826
Myo X 3 P1 R2	Myo	3	HStoHY	7	G	HY	34639	Tor-IR	Tor	4	2	287.545
Myo X 3 P1 R2	Myo	3	HStoHY	7	G	HY	34639	Tor-IR	Tor	4	2	226.526
Myo X 3 P1 R2	Myo	3	HStoHY	7	G	HY	34639	Tor-IR	Tor	4	2	216.157
Myo X 3 P1 R2	Myo	3	HStoHY	7	G	HY	34639	Tor-IR	Tor	4	2	199.806
Myo X 3 P1 R2	Myo	3	HStoHY	7	G	HY	34639	Tor-IR	Tor	4	2	180.064
Myo X 3 P1 R2	Myo	3	HStoHY	7	G	HY	34639	Tor-IR	Tor	4	2	123.832
Myo X 3 P1 R2	Myo	3	HStoHY	7	G	HY	34639	Tor-IR	Tor	4	2	217.154
Myo X 3 P1 R2	Myo	3	HStoHY	7	G	HY	34639	Tor-IR	Tor	4	2	251.452
Myo X 3 P1 R2	Myo	3	HStoHY	7	G	HY	34639	Tor-IR	Tor	4	2	444.278
Myo X 3 P1 R2	Myo	3	HStoHY	7	G	HY	34639	Tor-IR	Tor	4	2	236.696
Myo X 3 P1 R2	Myo	3	HStoHY	7	G	HY	34639	Tor-IR	Tor	4	2	177.472
Myo X 3 P1 R2	Myo	3	HStoHY	7	G	HY	34639	Tor-IR	Tor	4	2	184.052
Myo X 3 P1 R2	Myo	3	HStoHY	7	G	HY	34639	Tor-IR	Tor	4	2	142.376
Myo X 3 P1 R2	Myo	3	HStoHY	7	G	HY	34639	Tor-IR	Tor	4	2	257.633
Myo X 3 P1 R2	Myo	3	HStoHY	7	G	HY	34639	Tor-IR	Tor	4	2	356.938
Myo X 3 P1 R2	Myo	3	HStoHY	7	G	HY	34639	Tor-IR	Tor	4	2	205.19
Myo X 3 P1 R2	Myo	3	HStoHY	7	G	HY	34639	Tor-IR	Tor	4	2	208.38
Myo X 3 P1 R2	Myo	3	HStoHY	7	G	HY	34639	Tor-IR	Tor	4	2	170.692
Myo X 3 P1 R2	Myo	3	HStoHY	7	G	HY	34639	Tor-IR	Tor	4	2	69.792
Myo X 3 P1 R2	Myo	3	HStoHY	7	G	HY	34639	Tor-IR	Tor	4	2	477.978
Myo X 3 P1 R2	Myo	3	HStoHY	7	G	HY	34639	Tor-IR	Tor	4	2	413.57
Myo X 3 P1 R2	Myo	3	HStoHY	7	G	HY	34639	Tor-IR	Tor	4	2	165.707
Myo X 3 P1 R2	Myo	3	HStoHY	7	G	HY	34639	Tor-IR	Tor	4	2	474.588
Myo X 3 P1 R2	Myo	3	HStoHY	7	G	HY	34639	Tor-IR	Tor	4	2	621.551
Myo X 3 P1 R2	Myo	3	HStoHY	7	G	HY	34639	Tor-IR	Tor	4	2	187.442
Myo X 3 P1 R2	Myo	3	HStoHY	7	G	HY	34639	Tor-IR	Tor	4	2	264.413
Myo X 3 P1 R2	Myo	3	HStoHY	7	G	HY	34639	Tor-IR	Tor	4	2	124.031
Myo X 3 P1 R2	Myo	3	HStoHY	7	G	HY	34639	Tor-IR	Tor	4	2	151.549
Myo X 3 P1 R2	Myo	3	HStoHY	7	G	HY	34639	Tor-IR	Tor	4	2	213.764
Myo X 3 P1 R2	Myo	3	HStoHY	7	G	HY	34639	Tor-IR	Tor	4	2	184.651
Myo X 3 P1 R2	Myo	3	HStoHY	7	G	HY	34639	Tor-IR	Tor	4	2	153.543
Myo X 3 P1 R2	Myo	3	HStoHY	7	G	HY	34639	Tor-IR	Tor	4	2	221.541
Myo X 3 P1 R2	Myo	3	HStoHY	7	G	HY	34639	Tor-IR	Tor	4	2	155.138
Myo X 3 P1 R2	Myo	3	HStoHY	7	G	HY	34639	Tor-IR	Tor	4	2	107.68
Myo X 3 P1 R2	Myo	3	HStoHY	7	G	HY	34639	Tor-IR	Tor	4	2	107.281
Myo X 3 P1 R2	Myo	3	HStoHY	7	G	HY	34639	Tor-IR	Tor	4	2	126.424
Myo X 3 P1 R2	Myo	3	HStoHY	7	G	HY	34639	Tor-IR	Tor	4	2	132.605
Myo X 3 P1 R2	Myo	3	HStoHY	7	G	HY	34639	Tor-IR	Tor	4	3	131.808
Myo X 3 P1 R2	Myo	3	HStoHY	7	G	HY	34639	Tor-IR	Tor	4	3	155.338
Myo X 3 P1 R2	Myo	3	HStoHY	7	G	HY	34639	Tor-IR	Tor	4	3	139.984
Myo X 3 P1 R2	Myo	3	HStoHY	7	G	HY	34639	Tor-IR	Tor	4	3	270.396
Myo X 3 P1 R2	Myo	3	HStoHY	7	G	HY	34639	Tor-IR	Tor	4	3	99.703
Myo X 3 P1 R2	Myo	3	HStoHY	7	G	HY	34639	Tor-IR	Tor	4	3	246.068
Myo X 3 P1 R2	Myo	3	HStoHY	7	G	HY	34639	Tor-IR	Tor	4	3	155.537
Myo X 3 P1 R2	Myo	3	HStoHY	7	G	HY	34639	Tor-IR	Tor	4	3	118.647
Myo X 3 P1 R2	Myo	3	HStoHY	7	G	HY	34639	Tor-IR	Tor	4	3	78.766
Myo X 3 P1 R2	Myo	3	HStoHY	7	G	HY	34639	Tor-IR	Tor	4	3	89.733
Myo X 3 P1 R2	Myo	3	HStoHY	7	G	HY	34639	Tor-IR	Tor	4	3	228.72
Myo X 3 P1 R2	Myo	3	HStoHY	7	G	HY	34639	Tor-IR	Tor	4	3	171.091
Myo X 3 P1 R2	Myo	3	HStoHY	7	G	HY	34639	Tor-IR	Tor	4	3	305.292
Myo X 3 P1 R2	Myo	3	HStoHY	7	G	HY	34639	Tor-IR	Tor	4	3	206.984
Myo X 3 P1 R2	Myo	3	HStoHY	7	G	HY	34639	Tor-IR	Tor	4	3	80.959
Myo X 3 P1 R2	Myo	3	HStoHY	7	G	HY	34639	Tor-IR	Tor	4	3	96.912
Myo X 3 P1 R2	Myo	3	HStoHY	7	G	HY	34639	Tor-IR	Tor	4	3	85.745
Myo X 3 P1 R2	Myo	3	HStoHY	7	G	HY	34639	Tor-IR	Tor	4	3	174.68
Myo X 3 P1 R2	Myo	3	HStoHY	7	G	HY	34639	Tor-IR	Tor	4	3	95.715
Myo X 3 P1 R2	Myo	3	HStoHY	7	G	HY	34639	Tor-IR	Tor	4	3	124.23
Myo X 3 P1 R2	Myo	3	HStoHY	7	G	HY	34639	Tor-IR	Tor	4	3	134.4
Myo X 3 P1 R2	Myo	3	HStoHY	7	G	HY	34639	Tor-IR	Tor	4	3	215.359
Myo X 3 P1 R2	Myo	3	HStoHY	7	G	HY	34639	Tor-IR	Tor	4	3	287.545
Myo X 3 P1 R2	Myo	3	HStoHY	7	G	HY	34639	Tor-IR	Tor	4	3	109.474
Myo X 3 P1 R2	Myo	3	HStoHY	7	G	HY	34639	Tor-IR	Tor	4	3	129.415
Myo X 3 P1 R2	Myo	3	HStoHY	7	G	HY	34639	Tor-IR	Tor	4	3	217.952
Myo X 3 P1 R2	Myo	3	HStoHY	7	G	HY	34639	Tor-IR	Tor	4	3	216.157
Myo X 3 P1 R2	Myo	3	HStoHY	7	G	HY	34639	Tor-IR	Tor	4	3	139.784
Myo X 3 P1 R2	Myo	3	HStoHY	7	G	HY	34639	Tor-IR	Tor	4	3	256.038
Myo X 3 P1 R2	Myo	3	HStoHY	7	G	HY	34639	Tor-IR	Tor	4	3	203.594
Myo X 3 P1 R2	Myo	3	HStoHY	7	G	HY	34639	Tor-IR	Tor	4	3	234.901
Myo X 3 P1 R2	Myo	3	HStoHY	7	G	HY	34639	Tor-IR	Tor	4	3	304.693
Myo X 3 P1 R2	Myo	3	HStoHY	7	G	HY	34639	Tor-IR	Tor	4	3	155.338
Myo X 3 P1 R2	Myo	3	HStoHY	7	G	HY	34639	Tor-IR	Tor	4	3	236.297
Myo X 3 P1 R2	Myo	3	HStoHY	7	G	HY	34639	Tor-IR	Tor	4	3	91.129
Myo X 3 P1 R2	Myo	3	HStoHY	7	G	HY	34639	Tor-IR	Tor	4	3	123.433
Myo X 3 P1 R2	Myo	3	HStoHY	7	G	HY	34639	Tor-IR	Tor	4	3	117.052
Myo X 3 P1 R2	Myo	3	HStoHY	7	G	HY	34639	Tor-IR	Tor	4	3	176.276
Myo X 3 P1 R2	Myo	3	HStoHY	7	G	HY	34639	Tor-IR	Tor	4	3	198.809
Myo X 3 P1 R2	Myo	3	HStoHY	7	G	HY	34639	Tor-IR	Tor	4	3	268.202
Myo X 3 P1 R2	Myo	3	HStoHY	7	G	HY	34639	Tor-IR	Tor	4	4	53.64
Myo X 3 P1 R2	Myo	3	HStoHY	7	G	HY	34639	Tor-IR	Tor	4	4	143.373
Myo X 3 P1 R2	Myo	3	HStoHY	7	G	HY	34639	Tor-IR	Tor	4	4	134.4
Myo X 3 P1 R2	Myo	3	HStoHY	7	G	HY	34639	Tor-IR	Tor	4	4	149.754
Myo X 3 P1 R2	Myo	3	HStoHY	7	G	HY	34639	Tor-IR	Tor	4	4	112.266
Myo X 3 P1 R2	Myo	3	HStoHY	7	G	HY	34639	Tor-IR	Tor	4	4	101.498
Myo X 3 P1 R2	Myo	3	HStoHY	7	G	HY	34639	Tor-IR	Tor	4	4	169.296
Myo X 3 P1 R2	Myo	3	HStoHY	7	G	HY	34639	Tor-IR	Tor	4	4	342.78
Myo X 3 P1 R2	Myo	3	HStoHY	7	G	HY	34639	Tor-IR	Tor	4	4	207.184
Myo X 3 P1 R2	Myo	3	HStoHY	7	G	HY	34639	Tor-IR	Tor	4	4	93.322
Myo X 3 P1 R2	Myo	3	HStoHY	7	G	HY	34639	Tor-IR	Tor	4	4	137.79
Myo X 3 P1 R2	Myo	3	HStoHY	7	G	HY	34639	Tor-IR	Tor	4	4	139.984
Myo X 3 P1 R2	Myo	3	HStoHY	7	G	HY	34639	Tor-IR	Tor	4	4	153.743
Myo X 3 P1 R2	Myo	3	HStoHY	7	G	HY	34639	Tor-IR	Tor	4	4	105.287
Myo X 3 P1 R2	Myo	3	HStoHY	7	G	HY	34639	Tor-IR	Tor	4	4	142.775
Myo X 3 P1 R2	Myo	3	HStoHY	7	G	HY	34639	Tor-IR	Tor	4	4	134.4
Myo X 3 P1 R2	Myo	3	HStoHY	7	G	HY	34639	Tor-IR	Tor	4	4	179.665
Myo X 3 P1 R2	Myo	3	HStoHY	7	G	HY	34639	Tor-IR	Tor	4	4	127.421
Myo X 3 P1 R2	Myo	3	HStoHY	7	G	HY	34639	Tor-IR	Tor	4	4	148.159
Myo X 3 P1 R2	Myo	3	HStoHY	7	G	HY	34639	Tor-IR	Tor	4	4	107.879
Myo X 3 P1 R2	Myo	3	HStoHY	7	G	HY	34639	Tor-IR	Tor	4	4	90.73
Myo X 3 P1 R2	Myo	3	HStoHY	7	G	HY	34639	Tor-IR	Tor	4	4	126.424
Myo X 3 P1 R2	Myo	3	HStoHY	7	G	HY	34639	Tor-IR	Tor	4	4	166.505
Myo X 3 P1 R2	Myo	3	HStoHY	7	G	HY	34639	Tor-IR	Tor	4	4	169.496
Myo X 3 P1 R2	Myo	3	HStoHY	7	G	HY	34639	Tor-IR	Tor	4	4	113.861
Myo X 3 P1 R2	Myo	3	HStoHY	7	G	HY	34639	Tor-IR	Tor	4	4	156.335
Myo X 3 P1 R2	Myo	3	HStoHY	7	G	HY	34639	Tor-IR	Tor	4	4	104.689
Myo X 3 P1 R2	Myo	3	HStoHY	7	G	HY	34639	Tor-IR	Tor	4	4	114.858
Myo X 3 P1 R2	Myo	3	HStoHY	7	G	HY	34639	Tor-IR	Tor	4	4	144.171
Myo X 3 P1 R2	Myo	3	HStoHY	7	G	HY	34639	Tor-IR	Tor	4	4	127.421
Myo X 3 P1 R2	Myo	3	HStoHY	7	G	HY	34639	Tor-IR	Tor	4	4	153.543
Myo X 3 P1 R2	Myo	3	HStoHY	7	G	HY	34639	Tor-IR	Tor	4	4	161.719
Myo X 3 P1 R2	Myo	3	HStoHY	7	G	HY	34639	Tor-IR	Tor	4	4	141.579
Myo X 3 P1 R2	Myo	3	HStoHY	7	G	HY	34639	Tor-IR	Tor	4	4	135.995
Myo X 3 P1 R2	Myo	3	HStoHY	7	G	HY	34639	Tor-IR	Tor	4	4	76.373
Myo X 3 P1 R2	Myo	3	HStoHY	7	G	HY	34639	Tor-IR	Tor	4	4	161.918
Myo X 3 P1 R2	Myo	3	HStoHY	7	G	HY	34639	Tor-IR	Tor	4	4	126.025
Myo X 3 P1 R2	Myo	3	HStoHY	7	G	HY	34639	Tor-IR	Tor	4	4	105.885
Myo X 3 P1 R2	Myo	3	HStoHY	7	G	HY	34639	Tor-IR	Tor	4	4	155.138
Myo X 3 P1 R2	Myo	3	HStoHY	7	G	HY	34639	Tor-IR	Tor	4	4	60.021
Myo X 3 P1 R2	Myo	3	HStoHY	7	G	HY	34639	Tor-IR	Tor	4	5	476.781
Myo X 3 P1 R2	Myo	3	HStoHY	7	G	HY	34639	Tor-IR	Tor	4	5	327.825
Myo X 3 P1 R2	Myo	3	HStoHY	7	G	HY	34639	Tor-IR	Tor	4	5	641.491
Myo X 3 P1 R2	Myo	3	HStoHY	7	G	HY	34639	Tor-IR	Tor	4	5	319.45
Myo X 3 P1 R2	Myo	3	HStoHY	7	G	HY	34639	Tor-IR	Tor	4	5	276.378
Myo X 3 P1 R2	Myo	3	HStoHY	7	G	HY	34639	Tor-IR	Tor	4	6	276.777
Myo X 3 P1 R2	Myo	3	HStoHY	7	G	HY	34639	Tor-IR	Tor	4	6	169.296
Myo X 3 P1 R2	Myo	3	HStoHY	7	G	HY	34639	Tor-IR	Tor	4	6	141.978
Myo X 3 P1 R2	Myo	3	HStoHY	7	G	HY	34639	Tor-IR	Tor	4	6	200.204
Myo X 3 P1 R2	Myo	3	HStoHY	7	G	HY	34639	Tor-IR	Tor	4	6	205.389
Myo X 3 P1 R2	Myo	3	HStoHY	7	G	HY	34639	Tor-IR	Tor	4	6	172.686
Myo X 3 P1 R2	Myo	3	HStoHY	7	G	HY	34639	Tor-IR	Tor	4	6	211.969
Myo X 3 P1 R2	Myo	3	HStoHY	7	G	HY	34639	Tor-IR	Tor	4	6	183.454
Myo X 3 P1 R2	Myo	3	HStoHY	7	G	HY	34639	Tor-IR	Tor	4	6	384.257
Myo X 3 P1 R2	Myo	3	HStoHY	7	G	HY	34639	Tor-IR	Tor	4	6	316.06
Myo X 3 P1 R2	Myo	3	HStoHY	7	G	HY	34639	Tor-IR	Tor	4	6	438.296
Myo X 3 P1 R2	Myo	3	HStoHY	7	G	HY	34639	Tor-IR	Tor	4	6	314.464
Myo X 3 P1 R2	Myo	3	HStoHY	7	G	HY	34639	Tor-IR	Tor	4	6	520.452
Myo X 3 P1 R2	Myo	3	HStoHY	7	G	HY	34639	Tor-IR	Tor	4	6	95.915
Myo X 3 P1 R2	Myo	3	HStoHY	7	G	HY	34639	Tor-IR	Tor	4	6	183.853
Myo X 3 P1 R2	Myo	3	HStoHY	7	G	HY	34639	Tor-IR	Tor	4	6	158.329
Myo X 3 P1 R2	Myo	3	HStoHY	7	G	HY	34639	Tor-IR	Tor	4	6	251.252
Myo X 3 P1 R2	Myo	3	HStoHY	7	G	HY	34639	Tor-IR	Tor	4	6	336.798
Myo X 3 P1 R2	Myo	3	HStoHY	7	G	HY	34639	Tor-IR	Tor	4	6	148.757
Myo X 3 P1 R2	Myo	3	HStoHY	7	G	HY	34639	Tor-IR	Tor	4	6	290.137
Myo X 3 P1 R2	Myo	3	HStoHY	7	G	HY	34639	Tor-IR	Tor	4	6	252.648
Myo X 3 P1 R2	Myo	3	HStoHY	7	G	HY	34639	Tor-IR	Tor	4	6	147.362
Myo X 3 P1 R2	Myo	3	HStoHY	7	G	HY	34639	Tor-IR	Tor	4	6	156.135
Myo X 3 P1 R2	Myo	3	HStoHY	7	G	HY	34639	Tor-IR	Tor	4	6	112.665
Myo X 3 P1 R2	Myo	3	HStoHY	7	G	HY	34639	Tor-IR	Tor	4	6	90.331
Myo X 3 P1 R2	Myo	3	HStoHY	7	G	HY	34639	Tor-IR	Tor	4	6	133.603
Myo X 3 P1 R2	Myo	3	HStoHY	7	G	HY	34639	Tor-IR	Tor	4	6	158.927
Myo X 3 P1 R2	Myo	3	HStoHY	7	G	HY	34639	Tor-IR	Tor	4	6	221.74
Myo X 3 P1 R2	Myo	3	HStoHY	7	G	HY	34639	Tor-IR	Tor	4	6	153.743
Myo X 3 P1 R2	Myo	3	HStoHY	7	G	HY	34639	Tor-IR	Tor	4	6	200.803
[truncated: 428 more rows]
