# Supplementary material for: Multiscale analysis reveals that diet-dependent midgut plasticity emerges from alterations in both stem cell niche coupling and enterocyte size
Source: eLife. 2021 Sep 23;10:e64125. doi: 10.7554/eLife.64125 (PMC8528489; doi:10.7554/eLife.64125)
Supplement: Figure 7—source data 3. [file elife-64125-fig7-data3.csv]

Female.Line	Phase	Repeat	PhaseRep	Diet	Day	Group	C.G	Male.Line.ID	Male.Line	Gene	Total.L
Myo	T2	1	T2_1	HS	0	G	HS	36123	dMyc-IR	dMyc	3472.292
Myo	T2	1	T2_1	HS	0	G	HS	36123	dMyc-IR	dMyc	3769.346
Myo	T2	1	T2_1	HS	0	G	HS	36123	dMyc-IR	dMyc	3496.437
Myo	T2	1	T2_1	HS	0	G	HS	36123	dMyc-IR	dMyc	3426.302
Myo	T2	1	T2_1	HS	0	G	HS	36123	dMyc-IR	dMyc	3757.876
Myo	T2	1	T2_1	HS	0	G	HS	36123	dMyc-IR	dMyc	3871.114
Myo	T2	1	T2_1	HS	0	G	HS	36123	dMyc-IR	dMyc	3953.173
Myo	T2	1	T2_1	HS	0	G	HS	36123	dMyc-IR	dMyc	3511.607
Myo	T2	1	T2_1	HStoHY	7	G	HY	36123	dMyc-IR	dMyc	4737.491
Myo	T2	1	T2_1	HStoHY	7	G	HY	36123	dMyc-IR	dMyc	4032.182
Myo	T2	1	T2_1	HStoHY	7	G	HY	36123	dMyc-IR	dMyc	5106.543
Myo	T2	1	T2_1	HStoHY	7	G	HY	36123	dMyc-IR	dMyc	3251.39
Myo	T2	1	T2_1	HStoHY	7	G	HY	36123	dMyc-IR	dMyc	5207.969
Myo	T2	1	T2_1	HStoHY	7	G	HY	36123	dMyc-IR	dMyc	4255.958
Myo	T2	1	T2_1	HStoHY	7	G	HY	36123	dMyc-IR	dMyc	4875.197
Myo	T2	1	T2_1	HStoHY	7	G	HY	36123	dMyc-IR	dMyc	4301.729
Myo	T2	1	T2_1	HStoHY	7	G	HY	36123	dMyc-IR	dMyc	4986.688
Myo	attp2	2	attp2_2	HS	0	G	HS	36123	dMyc-IR	dMyc	3252.305
Myo	attp2	2	attp2_2	HS	0	G	HS	36123	dMyc-IR	dMyc	4020.538
Myo	attp2	2	attp2_2	HS	0	G	HS	36123	dMyc-IR	dMyc	3675.871
Myo	attp2	2	attp2_2	HS	0	G	HS	36123	dMyc-IR	dMyc	3610.24
Myo	attp2	2	attp2_2	HS	0	G	HS	36123	dMyc-IR	dMyc	3797.465
Myo	attp2	2	attp2_2	HS	0	G	HS	36123	dMyc-IR	dMyc	3731.917
Myo	attp2	2	attp2_2	HS	0	G	HS	36123	dMyc-IR	dMyc	3154.934
Myo	attp2	2	attp2_2	HS	0	G	HS	36123	dMyc-IR	dMyc	3583.66
Myo	attp2	2	attp2_2	HS	0	G	HS	36123	dMyc-IR	dMyc	3830.715
Myo	attp2	2	attp2_2	HStoHY	7	G	HY	36123	dMyc-IR	dMyc	3402.058
Myo	attp2	2	attp2_2	HStoHY	7	G	HY	36123	dMyc-IR	dMyc	5541.424
Myo	attp2	2	attp2_2	HStoHY	7	G	HY	36123	dMyc-IR	dMyc	4994.75
Myo	attp2	2	attp2_2	HStoHY	7	G	HY	36123	dMyc-IR	dMyc	4568.628
Myo	attp2	2	attp2_2	HStoHY	7	G	HY	36123	dMyc-IR	dMyc	4957.425
Myo	attp2	2	attp2_2	HStoHY	7	G	HY	36123	dMyc-IR	dMyc	5083.067
Myo	attp2	2	attp2_2	HStoHY	7	G	HY	36123	dMyc-IR	dMyc	5285.498
Myo	attp2	2	attp2_2	HStoHY	7	G	HY	36123	dMyc-IR	dMyc	4422.212
Myo	attp2	2	attp2_2	HStoHY	7	G	HY	36123	dMyc-IR	dMyc	3722.328
Myo	attp2	2	attp2_2	HStoHY	7	G	HY	36123	dMyc-IR	dMyc	4551.266
Myo	attp2	2	attp2_2	HStoHY	7	G	HY	36123	dMyc-IR	dMyc	4781.955
Myo	Last	A	Last_A	HS	0	G	HS	36123	dMyc-IR	dMyc	3696.001
Myo	Last	A	Last_A	HS	0	G	HS	36123	dMyc-IR	dMyc	3949.69
Myo	Last	A	Last_A	HS	0	G	HS	36123	dMyc-IR	dMyc	3067.501
Myo	Last	A	Last_A	HS	0	G	HS	36123	dMyc-IR	dMyc	3773.444
Myo	Last	A	Last_A	HS	0	G	HS	36123	dMyc-IR	dMyc	3128.951
Myo	Last	A	Last_A	HS	0	G	HS	36123	dMyc-IR	dMyc	3272.231
Myo	Last	A	Last_A	HS	0	G	HS	36123	dMyc-IR	dMyc	3972.662
Myo	Last	A	Last_A	HStoHY	7	G	HY	36123	dMyc-IR	dMyc	6787.856
Myo	Last	A	Last_A	HStoHY	7	G	HY	36123	dMyc-IR	dMyc	5386.919
Myo	Last	A	Last_A	HStoHY	7	G	HY	36123	dMyc-IR	dMyc	6354.166
Myo	Last	A	Last_A	HStoHY	7	G	HY	36123	dMyc-IR	dMyc	5111.588
Myo	Last	A	Last_A	HStoHY	7	G	HY	36123	dMyc-IR	dMyc	4370.241
Myo	Last	A	Last_A	HStoHY	7	G	HY	36123	dMyc-IR	dMyc	7001.702
Myo	Last	A	Last_A	HStoHY	7	G	HY	36123	dMyc-IR	dMyc	6107.105
Myo	Last	A	Last_A	HStoHY	7	G	HY	36123	dMyc-IR	dMyc	5205.083
Myo	Last	A	Last_A	HStoHY	7	G	HY	36123	dMyc-IR	dMyc	6730.419
Myo	Last	A	Last_A	HStoHY	7	G	HY	36123	dMyc-IR	dMyc	5829.472
Myo	attp2	2	attp2_2	HS	0	G	HS	34814	raptor-IR	raptor	3108.728
Myo	attp2	2	attp2_2	HS	0	G	HS	34814	raptor-IR	raptor	3758.647
Myo	attp2	2	attp2_2	HS	0	G	HS	34814	raptor-IR	raptor	2799.423
Myo	attp2	2	attp2_2	HS	0	G	HS	34814	raptor-IR	raptor	3487.601
Myo	attp2	2	attp2_2	HS	0	G	HS	34814	raptor-IR	raptor	3079.47
Myo	attp2	2	attp2_2	HS	0	G	HS	34814	raptor-IR	raptor	2907.298
Myo	attp2	2	attp2_2	HS	0	G	HS	34814	raptor-IR	raptor	3231.833
Myo	attp2	2	attp2_2	HS	0	G	HS	34814	raptor-IR	raptor	3148.111
Myo	attp2	2	attp2_2	HS	0	G	HS	34814	raptor-IR	raptor	3200.403
Myo	T1	1	T1_1	HStoHY	7	G	HY	34814	raptor-IR	raptor	5756.356
Myo	T1	1	T1_1	HStoHY	7	G	HY	34814	raptor-IR	raptor	5351.165
Myo	T1	1	T1_1	HStoHY	7	G	HY	34814	raptor-IR	raptor	5057.95
Myo	attp2	2	attp2_2	HStoHY	7	G	HY	34814	raptor-IR	raptor	5010.787
Myo	T1	1	T1_1	HStoHY	7	G	HY	34814	raptor-IR	raptor	4983.105
Myo	attp2	2	attp2_2	HStoHY	7	G	HY	34814	raptor-IR	raptor	4961.135
Myo	T1	1	T1_1	HStoHY	7	G	HY	34814	raptor-IR	raptor	4954.556
Myo	T1	1	T1_1	HStoHY	7	G	HY	34814	raptor-IR	raptor	4929.306
Myo	T1	1	T1_1	HStoHY	7	G	HY	34814	raptor-IR	raptor	4924.176
Myo	T1	1	T1_1	HStoHY	7	G	HY	34814	raptor-IR	raptor	4851.789
Myo	attp2	2	attp2_2	HStoHY	7	G	HY	34814	raptor-IR	raptor	4826.575
Myo	T1	1	T1_1	HStoHY	7	G	HY	34814	raptor-IR	raptor	4824.133
Myo	attp2	2	attp2_2	HStoHY	7	G	HY	34814	raptor-IR	raptor	4780.95
Myo	T1	1	T1_1	HStoHY	7	G	HY	34814	raptor-IR	raptor	4574.473
Myo	T1	1	T1_1	HS	0	G	HS	34814	raptor-IR	raptor	4074.193
Myo	T1	1	T1_1	HS	0	G	HS	34814	raptor-IR	raptor	3412.672
Myo	T1	1	T1_1	HS	0	G	HS	34814	raptor-IR	raptor	3768.66
Myo	T1	1	T1_1	HS	0	G	HS	34814	raptor-IR	raptor	4345.242
Myo	T1	1	T1_1	HS	0	G	HS	34814	raptor-IR	raptor	4252.033
Myo	T1	1	T1_1	HS	0	G	HS	34814	raptor-IR	raptor	3722.547
Myo	T1	1	T1_1	HS	0	G	HS	34814	raptor-IR	raptor	3718.382
Myo	T1	1	T1_1	HS	0	G	HS	34814	raptor-IR	raptor	4138.097
Myo	T1	1	T1_1	HS	0	G	HS	34814	raptor-IR	raptor	4335.468
Myo	attp2	2	attp2_2	HStoHY	7	G	HY	34814	raptor-IR	raptor	4537.034
Myo	attp2	2	attp2_2	HStoHY	7	G	HY	34814	raptor-IR	raptor	4524.646
Myo	attp2	2	attp2_2	HStoHY	7	G	HY	34814	raptor-IR	raptor	4463.412
Myo	attp2	2	attp2_2	HStoHY	7	G	HY	34814	raptor-IR	raptor	4255.321
Myo	attp2	2	attp2_2	HStoHY	7	G	HY	34814	raptor-IR	raptor	4207.431
Myo	attp2	2	attp2_2	HStoHY	7	G	HY	34814	raptor-IR	raptor	3883.162
Myo	T2	1	T2_1	HS	0	G	HS	41702	S6k-IR	S6k	2954.011
Myo	attp2	2	attp2_2	HS	0	G	HS	41702	S6k-IR	S6k	2967.901
Myo	T2	1	T2_1	HS	0	G	HS	41702	S6k-IR	S6k	3046.722
Myo	attp2	2	attp2_2	HS	0	G	HS	41702	S6k-IR	S6k	3118.199
Myo	attp2	2	attp2_2	HS	0	G	HS	41702	S6k-IR	S6k	3142.053
Myo	attp2	2	attp2_2	HS	0	G	HS	41702	S6k-IR	S6k	3190.198
Myo	T2	1	T2_1	HS	0	G	HS	41702	S6k-IR	S6k	3202.67
Myo	T2	1	T2_1	HS	0	G	HS	41702	S6k-IR	S6k	3233.139
Myo	T2	1	T2_1	HS	0	G	HS	41702	S6k-IR	S6k	3344.533
Myo	attp2	2	attp2_2	HS	0	G	HS	41702	S6k-IR	S6k	3430.412
Myo	T2	1	T2_1	HS	0	G	HS	41702	S6k-IR	S6k	3489.954
Myo	attp2	2	attp2_2	HS	0	G	HS	41702	S6k-IR	S6k	3539.63
Myo	attp2	2	attp2_2	HS	0	G	HS	41702	S6k-IR	S6k	3756.892
Myo	attp2	2	attp2_2	HStoHY	7	G	HY	41702	S6k-IR	S6k	3984.638
Myo	T2	1	T2_1	HStoHY	7	G	HY	41702	S6k-IR	S6k	4045.952
Myo	T2	1	T2_1	HStoHY	7	G	HY	41702	S6k-IR	S6k	4125.127
Myo	attp2	2	attp2_2	HStoHY	7	G	HY	41702	S6k-IR	S6k	4395.784
Myo	T2	1	T2_1	HStoHY	7	G	HY	41702	S6k-IR	S6k	4418.822
Myo	T2	1	T2_1	HStoHY	7	G	HY	41702	S6k-IR	S6k	4594.68
Myo	T2	1	T2_1	HStoHY	7	G	HY	41702	S6k-IR	S6k	4797.482
Myo	attp2	2	attp2_2	HStoHY	7	G	HY	41702	S6k-IR	S6k	4845.787
Myo	T2	1	T2_1	HStoHY	7	G	HY	41702	S6k-IR	S6k	4850.325
Myo	T2	1	T2_1	HS	0	G	HS	41702	S6k-IR	S6k	4000.478
Myo	T2	1	T2_1	HS	0	G	HS	41702	S6k-IR	S6k	4032.019
Myo	attp2	2	attp2_2	HStoHY	7	G	HY	41702	S6k-IR	S6k	4894.718
Myo	T2	1	T2_1	HStoHY	7	G	HY	41702	S6k-IR	S6k	4896.363
Myo	T2	1	T2_1	HStoHY	7	G	HY	41702	S6k-IR	S6k	4924.298
Myo	attp2	2	attp2_2	HStoHY	7	G	HY	41702	S6k-IR	S6k	5019.843
Myo	attp2	2	attp2_2	HStoHY	7	G	HY	41702	S6k-IR	S6k	5049.374
Myo	attp2	2	attp2_2	HStoHY	7	G	HY	41702	S6k-IR	S6k	5086.015
Myo	attp2	2	attp2_2	HStoHY	7	G	HY	41702	S6k-IR	S6k	5101.37
Myo	attp2	2	attp2_2	HStoHY	7	G	HY	41702	S6k-IR	S6k	5272.463
Myo	attp2	2	attp2_2	HStoHY	7	G	HY	41702	S6k-IR	S6k	5350.032
Myo	Last	A	Last_A	HStoHY	7	G	HY	34073	SREBP-IR	SREBP	5842.08
Myo	Last	A	Last_A	HStoHY	7	G	HY	34073	SREBP-IR	SREBP	5652.382
Myo	attp2	2	attp2_2	HStoHY	7	G	HY	34073	SREBP-IR	SREBP	5570.624
Myo	Last	A	Last_A	HStoHY	7	G	HY	34073	SREBP-IR	SREBP	5544.713
Myo	T2	1	T2_1	HStoHY	7	G	HY	34073	SREBP-IR	SREBP	5397.65
Myo	Last	A	Last_A	HStoHY	7	G	HY	34073	SREBP-IR	SREBP	5284.514
Myo	Last	A	Last_A	HStoHY	7	G	HY	34073	SREBP-IR	SREBP	5209.72
Myo	Last	A	Last_A	HStoHY	7	G	HY	34073	SREBP-IR	SREBP	5103.718
Myo	T2	1	T2_1	HStoHY	7	G	HY	34073	SREBP-IR	SREBP	5053.72
Myo	T2	1	T2_1	HStoHY	7	G	HY	34073	SREBP-IR	SREBP	4983.7
Myo	attp2	2	attp2_2	HStoHY	7	G	HY	34073	SREBP-IR	SREBP	4926.141
Myo	T2	1	T2_1	HStoHY	7	G	HY	34073	SREBP-IR	SREBP	4908.429
Myo	T2	1	T2_1	HStoHY	7	G	HY	34073	SREBP-IR	SREBP	4875.371
Myo	attp2	2	attp2_2	HStoHY	7	G	HY	34073	SREBP-IR	SREBP	4769.407
Myo	Last	A	Last_A	HStoHY	7	G	HY	34073	SREBP-IR	SREBP	4731.82
Myo	attp2	2	attp2_2	HStoHY	7	G	HY	34073	SREBP-IR	SREBP	4655.371
Myo	attp2	2	attp2_2	HStoHY	7	G	HY	34073	SREBP-IR	SREBP	4419.981
Myo	attp2	2	attp2_2	HStoHY	7	G	HY	34073	SREBP-IR	SREBP	4358.238
Myo	attp2	2	attp2_2	HStoHY	7	G	HY	34073	SREBP-IR	SREBP	4288.972
Myo	T2	1	T2_1	HS	0	G	HS	34073	SREBP-IR	SREBP	4281.007
Myo	attp2	2	attp2_2	HStoHY	7	G	HY	34073	SREBP-IR	SREBP	4278.336
Myo	Last	A	Last_A	HS	0	G	HS	34073	SREBP-IR	SREBP	4208.689
Myo	T2	1	T2_1	HStoHY	7	G	HY	34073	SREBP-IR	SREBP	4115.369
Myo	Last	A	Last_A	HStoHY	7	G	HY	34073	SREBP-IR	SREBP	4113.39
Myo	attp2	2	attp2_2	HStoHY	7	G	HY	34073	SREBP-IR	SREBP	4107.06
Myo	T2	1	T2_1	HS	0	G	HS	34073	SREBP-IR	SREBP	4097.887
Myo	T2	1	T2_1	HS	0	G	HS	34073	SREBP-IR	SREBP	3956.177
Myo	T2	1	T2_1	HS	0	G	HS	34073	SREBP-IR	SREBP	3900.826
Myo	T2	1	T2_1	HS	0	G	HS	34073	SREBP-IR	SREBP	3811.221
Myo	attp2	2	attp2_2	HS	0	G	HS	34073	SREBP-IR	SREBP	3810.627
Myo	attp2	2	attp2_2	HS	0	G	HS	34073	SREBP-IR	SREBP	3748.929
Myo	T2	1	T2_1	HS	0	G	HS	34073	SREBP-IR	SREBP	3644.453
Myo	attp2	2	attp2_2	HS	0	G	HS	34073	SREBP-IR	SREBP	3603.784
Myo	Last	A	Last_A	HS	0	G	HS	34073	SREBP-IR	SREBP	3502.578
Myo	Last	A	Last_A	HS	0	G	HS	34073	SREBP-IR	SREBP	3474.805
Myo	attp2	2	attp2_2	HS	0	G	HS	34073	SREBP-IR	SREBP	3446.107
Myo	attp2	2	attp2_2	HS	0	G	HS	34073	SREBP-IR	SREBP	3390.614
Myo	attp2	2	attp2_2	HS	0	G	HS	34073	SREBP-IR	SREBP	3301.161
Myo	Last	A	Last_A	HS	0	G	HS	34073	SREBP-IR	SREBP	3281.988
Myo	Last	A	Last_A	HS	0	G	HS	34073	SREBP-IR	SREBP	3242.668
Myo	Last	A	Last_A	HS	0	G	HS	34073	SREBP-IR	SREBP	3098.416
Myo	attp2	2	attp2_2	HS	0	G	HS	34073	SREBP-IR	SREBP	3074.172
Myo	Last	A	Last_A	HS	0	G	HS	34073	SREBP-IR	SREBP	2855.73
Myo	1(2020)	1	1(2020)_1	HStoHY	7	G	HY	34639	Tor-IR	Tor	5834.595
Myo	05_02	2	05_02_2	HStoHY	7	G	HY	34639	Tor-IR	Tor	5720.61
Myo	1(2020)	2	1(2020)_2	HStoHY	7	G	HY	34639	Tor-IR	Tor	5699.59
Myo	05_03	3	05_03_3	HStoHY	7	G	HY	34639	Tor-IR	Tor	5661.749
Myo	05_03	3	05_03_3	HStoHY	7	G	HY	34639	Tor-IR	Tor	5365.526
Myo	05_02	2	05_02_2	HStoHY	7	G	HY	34639	Tor-IR	Tor	5174.246
Myo	1(2020)	1	1(2020)_1	HStoHY	7	G	HY	34639	Tor-IR	Tor	4980.098
Myo	05_03	3	05_03_3	HS	0	G	HS	34639	Tor-IR	Tor	4830.079
Myo	05_03	3	05_03_3	HStoHY	7	G	HY	34639	Tor-IR	Tor	4788.686
Myo	05_03	3	05_03_3	HStoHY	7	G	HY	34639	Tor-IR	Tor	4725.951
Myo	1(2020)	2	1(2020)_2	HStoHY	7	G	HY	34639	Tor-IR	Tor	4657.551
Myo	05_03	3	05_03_3	HStoHY	7	G	HY	34639	Tor-IR	Tor	4631.408
Myo	1(2020)	1	1(2020)_1	HStoHY	7	G	HY	34639	Tor-IR	Tor	4622.925
Myo	05_02	2	05_02_2	HS	0	G	HS	34639	Tor-IR	Tor	4565.831
Myo	05_03	3	05_03_3	HS	0	G	HS	34639	Tor-IR	Tor	4547.952
Myo	1(2020)	1	1(2020)_1	HStoHY	7	G	HY	34639	Tor-IR	Tor	4485.84
Myo	1(2020)	2	1(2020)_2	HStoHY	7	G	HY	34639	Tor-IR	Tor	4465.052
Myo	1(2020)	2	1(2020)_2	HStoHY	7	G	HY	34639	Tor-IR	Tor	4433.004
Myo	05_02	2	05_02_2	HStoHY	7	G	HY	34639	Tor-IR	Tor	4432.265
Myo	05_03	3	05_03_3	HS	0	G	HS	34639	Tor-IR	Tor	4409.832
Myo	1(2020)	1	1(2020)_1	HStoHY	7	G	HY	34639	Tor-IR	Tor	4393.698
Myo	05_03	3	05_03_3	HS	0	G	HS	34639	Tor-IR	Tor	4384.216
Myo	1(2020)	2	1(2020)_2	HStoHY	7	G	HY	34639	Tor-IR	Tor	4378.793
Myo	1(2020)	2	1(2020)_2	HStoHY	7	G	HY	34639	Tor-IR	Tor	4377.52
Myo	1(2020)	2	1(2020)_2	HStoHY	7	G	HY	34639	Tor-IR	Tor	4319.113
Myo	1(2020)	1	1(2020)_1	HStoHY	7	G	HY	34639	Tor-IR	Tor	4311.643
Myo	05_02	2	05_02_2	HStoHY	7	G	HY	Wt	Control	Control	4761.242
Myo	T1	1	T1_1	HStoHY	7	G	HY	Wt	Control	Control	4700.049
Myo	05_02	2	05_02_2	HStoHY	7	G	HY	Wt	Control	Control	5062.665
Myo	T1	1	T1_1	HStoHY	7	G	HY	Wt	Control	Control	4963.19
Myo	T1	1	T1_1	HStoHY	7	G	HY	Wt	Control	Control	5049.596
Myo	05_02	2	05_02_2	HStoHY	7	G	HY	Wt	Control	Control	5626.296
Myo	attp2	2	attp2_2	HStoHY	7	G	HY	Wt	Control	Control	5299.699
Myo	T2	1	T2_1	HStoHY	7	G	HY	Wt	Control	Control	5319.313
Myo	T2	1	T2_1	HStoHY	7	G	HY	Wt	Control	Control	5447.421
Myo	T2	1	T2_1	HStoHY	7	G	HY	Wt	Control	Control	5495.636
Myo	T2	1	T2_1	HStoHY	7	G	HY	Wt	Control	Control	5506.365
Myo	T1	1	T1_1	HStoHY	7	G	HY	Wt	Control	Control	5514.357
Myo	05_02	2	05_02_2	HStoHY	7	G	HY	Wt	Control	Control	5787.41
Myo	05_02	2	05_02_2	HStoHY	7	G	HY	Wt	Control	Control	5803.814
Myo	T2	1	T2_1	HStoHY	7	G	HY	Wt	Control	Control	5704.34
Myo	05_02	2	05_02_2	HStoHY	7	G	HY	Wt	Control	Control	6140.963
Myo	attp2	2	attp2_2	HStoHY	7	G	HY	Wt	Control	Control	5800.018
Myo	T1	1	T1_1	HStoHY	7	G	HY	Wt	Control	Control	5878.534
Myo	attp2	2	attp2_2	HStoHY	7	G	HY	Wt	Control	Control	5926.637
Myo	05_02	2	05_02_2	HStoHY	7	G	HY	Wt	Control	Control	6176.403
Myo	T2	1	T2_1	HStoHY	7	G	HY	Wt	Control	Control	5961.652
Myo	attp2	2	attp2_2	HStoHY	7	G	HY	Wt	Control	Control	5965.252
Myo	T2	1	T2_1	HStoHY	7	G	HY	Wt	Control	Control	6169.195
Myo	05_02	2	05_02_2	HStoHY	7	G	HY	Wt	Control	Control	6535.762
Myo	T2	1	T2_1	HStoHY	7	G	HY	Wt	Control	Control	6170.306
Myo	05_02	2	05_02_2	HStoHY	7	G	HY	Wt	Control	Control	6539.349
Myo	attp2	2	attp2_2	HStoHY	7	G	HY	Wt	Control	Control	6232.796
Myo	T2	1	T2_1	HStoHY	7	G	HY	Wt	Control	Control	6276.383
Myo	05_02	2	05_02_2	HStoHY	7	G	HY	Wt	Control	Control	6870.273
Myo	attp2	2	attp2_2	HStoHY	7	G	HY	Wt	Control	Control	6770.763
Myo	05_02	2	05_02_2	HS	0	G	HS	Wt	Control	Control	3476.973
Myo	05_02	2	05_02_2	HS	0	G	HS	Wt	Control	Control	3571.434
Myo	1	1	1_1	HStoHY	7	G	HY	Wt	Control	Control	7082.113
Myo	1	1	1_1	HStoHY	7	G	HY	Wt	Control	Control	7091.94
Myo	1	1	1_1	HStoHY	7	G	HY	Wt	Control	Control	7233.73
Myo	1	1	1_1	HStoHY	7	G	HY	Wt	Control	Control	7260.632
Myo	1	1	1_1	HStoHY	7	G	HY	Wt	Control	Control	7615.347
Myo	attp2	2	attp2_2	HS	0	G	HS	Wt	Control	Control	3281.282
Myo	T2	1	T2_1	HS	0	G	HS	Wt	Control	Control	3475.401
Myo	T2	1	T2_1	HS	0	G	HS	Wt	Control	Control	3531.231
Myo	T2	1	T2_1	HS	0	G	HS	Wt	Control	Control	3612.167
Myo	attp2	2	attp2_2	HS	0	G	HS	Wt	Control	Control	3652.468
Myo	05_02	2	05_02_2	HS	0	G	HS	Wt	Control	Control	3705.094
Myo	T2	1	T2_1	HS	0	G	HS	Wt	Control	Control	3697.005
Myo	T2	1	T2_1	HS	0	G	HS	Wt	Control	Control	3714.69
Myo	T2	1	T2_1	HS	0	G	HS	Wt	Control	Control	3759.989
Myo	05_02	2	05_02_2	HS	0	G	HS	Wt	Control	Control	3780.016
Myo	05_02	2	05_02_2	HS	0	G	HS	Wt	Control	Control	3806.576
Myo	05_02	2	05_02_2	HS	0	G	HS	Wt	Control	Control	3874.661
Myo	05_02	2	05_02_2	HS	0	G	HS	Wt	Control	Control	3914.94
Myo	05_02	2	05_02_2	HS	0	G	HS	Wt	Control	Control	4019.153
Myo	05_02	2	05_02_2	HS	0	G	HS	Wt	Control	Control	4081.135
Myo	T2	1	T2_1	HS	0	G	HS	Wt	Control	Control	3766.186
Myo	attp2	2	attp2_2	HS	0	G	HS	Wt	Control	Control	3768.05
Myo	attp2	2	attp2_2	HS	0	G	HS	Wt	Control	Control	3795.128
Myo	05_03	3	05_03_3	HStoHY	7	G	HY	Wt	Control	Control	6525.953
Myo	05_03	3	05_03_3	HStoHY	7	G	HY	Wt	Control	Control	6631.164
Myo	05_03	3	05_03_3	HStoHY	7	G	HY	Wt	Control	Control	6635.705
Myo	05_03	3	05_03_3	HStoHY	7	G	HY	Wt	Control	Control	6894.416
Myo	05_03	3	05_03_3	HStoHY	7	G	HY	Wt	Control	Control	6897.992
Myo	05_03	3	05_03_3	HStoHY	7	G	HY	Wt	Control	Control	6939.192
Myo	05_03	3	05_03_3	HStoHY	7	G	HY	Wt	Control	Control	7274.37
Myo	05_03	3	05_03_3	HStoHY	7	G	HY	Wt	Control	Control	7575.841
Myo	05_03	3	05_03_3	HS	0	G	HS	Wt	Control	Control	3760.626
Myo	attp2	2	attp2_2	HS	0	G	HS	Wt	Control	Control	3823.633
Myo	attp2	2	attp2_2	HS	0	G	HS	Wt	Control	Control	3922.406
Myo	T1	1	T1_1	HS	0	G	HS	Wt	Control	Control	3977.578
Myo	T1	1	T1_1	HS	0	G	HS	Wt	Control	Control	3994.121
Myo	1	1	1_1	HS	0	G	HS	Wt	Control	Control	4005.642
Myo	1	1	1_1	HS	0	G	HS	Wt	Control	Control	4200.085
Myo	T1	1	T1_1	HS	0	G	HS	Wt	Control	Control	4201.477
Myo	attp2	2	attp2_2	HS	0	G	HS	Wt	Control	Control	4228.247
Myo	1	1	1_1	HS	0	G	HS	Wt	Control	Control	4253.107
Myo	T1	1	T1_1	HS	0	G	HS	Wt	Control	Control	4259.695
Myo	T1	1	T1_1	HS	0	G	HS	Wt	Control	Control	4310.689
Myo	T1	1	T1_1	HS	0	G	HS	Wt	Control	Control	4375.599
Myo	T1	1	T1_1	HS	0	G	HS	Wt	Control	Control	4397.458
Myo	T1	1	T1_1	HS	0	G	HS	Wt	Control	Control	4435.645
Myo	T1	1	T1_1	HS	0	G	HS	Wt	Control	Control	4502.462
Myo	1	1	1_1	HS	0	G	HS	Wt	Control	Control	4505.946
Myo	1	1	1_1	HS	0	G	HS	Wt	Control	Control	4508.2
Myo	1	1	1_1	HS	0	G	HS	Wt	Control	Control	4572.146
Myo	1	1	1_1	HS	0	G	HS	Wt	Control	Control	4608.881
Myo	1	1	1_1	HS	0	G	HS	Wt	Control	Control	4798.836
Myo	05_03	3	05_03_3	HS	0	G	HS	Wt	Control	Control	3806.57
Myo	05_03	3	05_03_3	HS	0	G	HS	Wt	Control	Control	4371.589
Myo	05_03	3	05_03_3	HS	0	G	HS	Wt	Control	Control	4384.264
Myo	05_03	3	05_03_3	HS	0	G	HS	Wt	Control	Control	4461.224
Myo	05_03	3	05_03_3	HS	0	G	HS	Wt	Control	Control	4572.986
Myo	05_03	3	05_03_3	HS	0	G	HS	Wt	Control	Control	4776.385
Myo	Last	A	Last_A	HS	0	G	HS	Wt	Control	Control	4031.163
Myo	Last	A	Last_A	HS	0	G	HS	Wt	Control	Control	4131.201
Myo	Last	A	Last_A	HS	0	G	HS	Wt	Control	Control	4248.284
Myo	Last	A	Last_A	HS	0	G	HS	Wt	Control	Control	4586.676
Myo	Last	A	Last_A	HS	0	G	HS	Wt	Control	Control	3892.237
Myo	Last	A	Last_A	HS	0	G	HS	Wt	Control	Control	3666.948
Myo	Last	A	Last_A	HS	0	G	HS	Wt	Control	Control	3993.142
Myo	Last	A	Last_A	HS	0	G	HS	Wt	Control	Control	3346.354
Myo	Last	A	Last_A	HStoHY	7	G	HY	Wt	Control	Control	4837.178
Myo	Last	A	Last_A	HStoHY	7	G	HY	Wt	Control	Control	5383.585
Myo	Last	A	Last_A	HStoHY	7	G	HY	Wt	Control	Control	5584.644
Myo	Last	A	Last_A	HStoHY	7	G	HY	Wt	Control	Control	4974.861
Myo	Last	A	Last_A	HStoHY	7	G	HY	Wt	Control	Control	5885.014
Myo	Last	A	Last_A	HStoHY	7	G	HY	Wt	Control	Control	5856.559
Myo	Last	A	Last_A	HStoHY	7	G	HY	Wt	Control	Control	6494.088
Myo	Last	A	Last_A	HStoHY	7	G	HY	Wt	Control	Control	6098.817
Myo	Last	A	Last_A	HStoHY	7	G	HY	Wt	Control	Control	5703.836
Myo	Last	A	Last_A	HStoHY	7	G	HY	Wt	Control	Control	4598.512
Myo	1(2020)	1	1(2020)_1	HStoHY	7	G	HY	41702	S6k-IR	S6k	5865.91
Myo	1(2020)	1	1(2020)_1	HStoHY	7	G	HY	41702	S6k-IR	S6k	5710.95
Myo	1(2020)	1	1(2020)_1	HStoHY	7	G	HY	41702	S6k-IR	S6k	5691.724
Myo	1(2020)	1	1(2020)_1	HStoHY	7	G	HY	41702	S6k-IR	S6k	5542.76
Myo	1(2020)	1	1(2020)_1	HStoHY	7	G	HY	41702	S6k-IR	S6k	5523.008
Myo	1(2020)	1	1(2020)_1	HStoHY	7	G	HY	41702	S6k-IR	S6k	5397.348
Myo	1(2020)	1	1(2020)_1	HStoHY	7	G	HY	41702	S6k-IR	S6k	5243.235
Myo	1(2020)	1	1(2020)_1	HStoHY	7	G	HY	41702	S6k-IR	S6k	5197.957
Myo	1(2020)	1	1(2020)_1	HS	0	G	HS	41702	S6k-IR	S6k	4416.763
Myo	1(2020)	1	1(2020)_1	HS	0	G	HS	41702	S6k-IR	S6k	4153.488
Myo	1(2020)	1	1(2020)_1	HS	0	G	HS	41702	S6k-IR	S6k	3881.053
Myo	1(2020)	1	1(2020)_1	HS	0	G	HS	41702	S6k-IR	S6k	3877.897
Myo	1(2020)	1	1(2020)_1	HS	0	G	HS	41702	S6k-IR	S6k	3845.596
Myo	1(2020)	1	1(2020)_1	HS	0	G	HS	41702	S6k-IR	S6k	3786.162
Myo	1(2020)	1	1(2020)_1	HS	0	G	HS	41702	S6k-IR	S6k	3684.937
Myo	05_02	2	05_02_2	HS	0	G	HS	34639	Tor-IR	Tor	4229.045
Myo	05_03	3	05_03_3	HS	0	G	HS	34639	Tor-IR	Tor	4197.896
Myo	1(2020)	1	1(2020)_1	HStoHY	7	G	HY	34639	Tor-IR	Tor	4168.228
Myo	05_03	3	05_03_3	HS	0	G	HS	34639	Tor-IR	Tor	4167.703
Myo	1(2020)	2	1(2020)_2	HS	0	G	HS	34639	Tor-IR	Tor	4161.424
Myo	1(2020)	2	1(2020)_2	HStoHY	7	G	HY	34639	Tor-IR	Tor	4113.729
Myo	1(2020)	1	1(2020)_1	HStoHY	7	G	HY	34639	Tor-IR	Tor	4096.659
Myo	05_03	3	05_03_3	HStoHY	7	G	HY	34639	Tor-IR	Tor	3989.319
Myo	1(2020)	2	1(2020)_2	HStoHY	7	G	HY	34639	Tor-IR	Tor	3982.334
Myo	05_03	3	05_03_3	HS	0	G	HS	34639	Tor-IR	Tor	3961.809
Myo	1(2020)	2	1(2020)_2	HS	0	G	HS	34639	Tor-IR	Tor	3847.558
Myo	1(2020)	2	1(2020)_2	HS	0	G	HS	34639	Tor-IR	Tor	3769.752
Myo	05_02	2	05_02_2	HS	0	G	HS	34639	Tor-IR	Tor	3745.649
Myo	05_02	2	05_02_2	HS	0	G	HS	34639	Tor-IR	Tor	3706.085
Myo	05_02	2	05_02_2	HS	0	G	HS	34639	Tor-IR	Tor	3650.046
Myo	1(2020)	2	1(2020)_2	HS	0	G	HS	34639	Tor-IR	Tor	3579.888
Myo	1(2020)	1	1(2020)_1	HS	0	G	HS	34639	Tor-IR	Tor	3543.957
Myo	1(2020)	1	1(2020)_1	HS	0	G	HS	34639	Tor-IR	Tor	3541.814
Myo	1(2020)	1	1(2020)_1	HS	0	G	HS	34639	Tor-IR	Tor	3512.465
Myo	1(2020)	2	1(2020)_2	HS	0	G	HS	34639	Tor-IR	Tor	3460.76
Myo	1(2020)	2	1(2020)_2	HS	0	G	HS	34639	Tor-IR	Tor	3408.032
Myo	1(2020)	2	1(2020)_2	HS	0	G	HS	34639	Tor-IR	Tor	3383.281
Myo	05_03	3	05_03_3	HS	0	G	HS	34639	Tor-IR	Tor	3381.414
Myo	1(2020)	2	1(2020)_2	HS	0	G	HS	34639	Tor-IR	Tor	3377.481
Myo	05_02	2	05_02_2	HS	0	G	HS	34639	Tor-IR	Tor	3351.03
Myo	1(2020)	1	1(2020)_1	HS	0	G	HS	36123	dMyc-IR	dMyc	3696.726
Myo	1(2020)	1	1(2020)_1	HS	0	G	HS	36123	dMyc-IR	dMyc	3726.396
Myo	1(2020)	1	1(2020)_1	HS	0	G	HS	36123	dMyc-IR	dMyc	3696.714
Myo	1(2020)	1	1(2020)_1	HS	0	G	HS	36123	dMyc-IR	dMyc	3700.142
Myo	1(2020)	1	1(2020)_1	HS	0	G	HS	36123	dMyc-IR	dMyc	4225.128
Myo	1(2020)	1	1(2020)_1	HS	0	G	HS	34814	raptor-IR	raptor	3846.656
Myo	1(2020)	1	1(2020)_1	HS	0	G	HS	34814	raptor-IR	raptor	3974.906
Myo	1(2020)	1	1(2020)_1	HS	0	G	HS	34814	raptor-IR	raptor	3623.972
Myo	1(2020)	1	1(2020)_1	HS	0	G	HS	34814	raptor-IR	raptor	3603.977
Myo	1(2020)	1	1(2020)_1	HS	0	G	HS	34814	raptor-IR	raptor	3665.213
Myo	1(2020)	1	1(2020)_1	HS	0	G	HS	34814	raptor-IR	raptor	3690.489
Myo	1(2020)	1	1(2020)_1	HS	0	G	HS	34814	raptor-IR	raptor	3997.181
Myo	1(2020)	1	1(2020)_1	HS	0	G	HS	Wt	Control	Control	4930.81
Myo	1(2020)	1	1(2020)_1	HS	0	G	HS	Wt	Control	Control	3468.698
Myo	1(2020)	1	1(2020)_1	HS	0	G	HS	Wt	Control	Control	3396.975
Myo	1(2020)	1	1(2020)_1	HS	0	G	HS	Wt	Control	Control	4312.268
Myo	1(2020)	1	1(2020)_1	HS	0	G	HS	Wt	Control	Control	3315.885
Myo	1(2020)	1	1(2020)_1	HS	0	G	HS	Wt	Control	Control	3141.776
Myo	1(2020)	1	1(2020)_1	HS	0	G	HS	34639	Tor-IR	Tor	3267.181
Myo	1(2020)	2	1(2020)_2	HS	0	G	HS	34639	Tor-IR	Tor	3254.787
Myo	1(2020)	1	1(2020)_1	HStoHY	7	G	HY	Wt	Control	Control	6208.495
Myo	1(2020)	1	1(2020)_1	HStoHY	7	G	HY	Wt	Control	Control	5449.87
Myo	1(2020)	1	1(2020)_1	HStoHY	7	G	HY	Wt	Control	Control	6002.082
Myo	1(2020)	1	1(2020)_1	HStoHY	7	G	HY	Wt	Control	Control	5335.373
Myo	1(2020)	1	1(2020)_1	HStoHY	7	G	HY	Wt	Control	Control	5566.392
Myo	1(2020)	1	1(2020)_1	HStoHY	7	G	HY	Wt	Control	Control	6106.821
Myo	1(2020)	1	1(2020)_1	HStoHY	7	G	HY	Wt	Control	Control	5830.629
Myo	05_02	2	05_02_2	HS	0	G	HS	34639	Tor-IR	Tor	3253.032
Myo	05_03	3	05_03_3	HStoHY	7	G	HY	34639	Tor-IR	Tor	3247.54
Myo	1(2020)	1	1(2020)_1	HS	0	G	HS	34639	Tor-IR	Tor	3119.883
Myo	1(2020)	1	1(2020)_1	HStoHY	7	G	HY	36123	dMyc-IR	dMyc	4641.459
Myo	1(2020)	1	1(2020)_1	HStoHY	7	G	HY	36123	dMyc-IR	dMyc	5270.318
Myo	1(2020)	1	1(2020)_1	HStoHY	7	G	HY	36123	dMyc-IR	dMyc	4143.556
Myo	1(2020)	1	1(2020)_1	HStoHY	7	G	HY	36123	dMyc-IR	dMyc	5919.418
Myo	1(2020)	1	1(2020)_1	HStoHY	7	G	HY	36123	dMyc-IR	dMyc	4742.141
Myo	1(2020)	1	1(2020)_1	HStoHY	7	G	HY	36123	dMyc-IR	dMyc	5359.429
Myo	1(2020)	1	1(2020)_1	HStoHY	7	G	HY	34814	raptor-IR	raptor	5667.362
Myo	1(2020)	1	1(2020)_1	HStoHY	7	G	HY	34814	raptor-IR	raptor	5519.73
Myo	1(2020)	1	1(2020)_1	HStoHY	7	G	HY	34814	raptor-IR	raptor	5528.579
Myo	1(2020)	1	1(2020)_1	HStoHY	7	G	HY	34814	raptor-IR	raptor	5113.987
Myo	1(2020)	1	1(2020)_1	HStoHY	7	G	HY	34814	raptor-IR	raptor	5002.734
Myo	1(2020)	1	1(2020)_1	HStoHY	7	G	HY	34814	raptor-IR	raptor	4753.133
Myo	1(2020)	1	1(2020)_1	HStoHY	7	G	HY	34814	raptor-IR	raptor	4411.382
Myo	1(2020)	2	1(2020)_2	HS	0	G	HS	36123	dMyc-IR	dMyc	3661.939
Myo	1(2020)	2	1(2020)_2	HS	0	G	HS	36123	dMyc-IR	dMyc	4003.279
Myo	1(2020)	2	1(2020)_2	HS	0	G	HS	36123	dMyc-IR	dMyc	3959.083
Myo	1(2020)	2	1(2020)_2	HS	0	G	HS	36123	dMyc-IR	dMyc	3709.713
Myo	1(2020)	2	1(2020)_2	HS	0	G	HS	36123	dMyc-IR	dMyc	3906.811
Myo	1(2020)	2	1(2020)_2	HS	0	G	HS	36123	dMyc-IR	dMyc	3743.473
Myo	1(2020)	2	1(2020)_2	HS	0	G	HS	36123	dMyc-IR	dMyc	4013.201
Myo	1(2020)	2	1(2020)_2	HS	0	G	HS	Wt	Control	Control	3705.899
Myo	1(2020)	2	1(2020)_2	HS	0	G	HS	Wt	Control	Control	3906.972
Myo	1(2020)	2	1(2020)_2	HS	0	G	HS	Wt	Control	Control	3864.875
Myo	1(2020)	2	1(2020)_2	HS	0	G	HS	Wt	Control	Control	3638.775
Myo	1(2020)	2	1(2020)_2	HS	0	G	HS	Wt	Control	Control	4616.519
Myo	1(2020)	2	1(2020)_2	HS	0	G	HS	Wt	Control	Control	3982.359
Myo	1(2020)	2	1(2020)_2	HS	0	G	HS	Wt	Control	Control	3405.043
Myo	1(2020)	2	1(2020)_2	HStoHY	7	G	HY	36123	dMyc-IR	dMyc	5825.794
Myo	1(2020)	2	1(2020)_2	HStoHY	7	G	HY	36123	dMyc-IR	dMyc	6687.765
Myo	1(2020)	2	1(2020)_2	HStoHY	7	G	HY	36123	dMyc-IR	dMyc	5443.013
Myo	1(2020)	2	1(2020)_2	HStoHY	7	G	HY	36123	dMyc-IR	dMyc	5908.88
Myo	1(2020)	2	1(2020)_2	HStoHY	7	G	HY	36123	dMyc-IR	dMyc	6389.321
Myo	1(2020)	2	1(2020)_2	HStoHY	7	G	HY	36123	dMyc-IR	dMyc	5919.179
Myo	1(2020)	2	1(2020)_2	HStoHY	7	G	HY	36123	dMyc-IR	dMyc	6169.946
Myo	1(2020)	2	1(2020)_2	HStoHY	7	G	HY	36123	dMyc-IR	dMyc	5352.529
Myo	1(2020)	2	1(2020)_2	HStoHY	7	G	HY	36123	dMyc-IR	dMyc	5807.954
Myo	1(2020)	2	1(2020)_2	HStoHY	7	G	HY	Wt	Control	Control	6275.001
Myo	1(2020)	2	1(2020)_2	HStoHY	7	G	HY	Wt	Control	Control	6438.106
Myo	1(2020)	2	1(2020)_2	HStoHY	7	G	HY	Wt	Control	Control	6042.683
Myo	1(2020)	2	1(2020)_2	HStoHY	7	G	HY	Wt	Control	Control	6031.051
Myo	1(2020)	2	1(2020)_2	HStoHY	7	G	HY	Wt	Control	Control	7741.29
Myo	1(2020)	2	1(2020)_2	HStoHY	7	G	HY	Wt	Control	Control	7177.195
Myo	1(2020)	2	1(2020)_2	HStoHY	7	G	HY	Wt	Control	Control	6767.346
