# Supplementary material for: Multiscale analysis reveals that diet-dependent midgut plasticity emerges from alterations in both stem cell niche coupling and enterocyte size
Source: eLife. 2021 Sep 23;10:e64125. doi: 10.7554/eLife.64125 (PMC8528489; doi:10.7554/eLife.64125)
Supplement: Figure 7—source data 4. [file elife-64125-fig7-data4.csv]

Male.Line	Gut	Region	RegionN	Area	GFP	CellNumber
Atg2-IR	1	1	0	511.215	Yes	1
Atg2-IR	1	1	0	168.646	No	1
Atg2-IR	1	1	0	192.292	No	1
Atg2-IR	1	1	0	108.75	No	1
Atg2-IR	1	1	0	265.574	No	1
Atg2-IR	1	1	0	143.437	No	1
Atg2-IR	1	2	0	573.065	Yes	1
Atg2-IR	1	2	0	368.169	No	1
Atg2-IR	1	2	0	273	No	1
Atg2-IR	1	2	0	310.227	No	1
Atg2-IR	1	2	0	177.538	No	1
Atg2-IR	1	2	0	174.9	No	1
Atg2-IR	2	2	0	186.527	Yes	1
Atg2-IR	2	2	0	134.937	No	1
Atg2-IR	2	2	0	158.387	No	1
Atg2-IR	2	2	0	228.347	No	1
Atg2-IR	2	2	0	358.691	No	1
Atg2-IR	2	2	0	164.933	No	1
Atg2-IR	3	2	0	792.716	Yes	1
Atg2-IR	3	2	0	186.234	No	1
Atg2-IR	3	2	0	280.523	No	1
Atg2-IR	3	2	0	179.003	No	1
Atg2-IR	3	2	0	129.367	No	1
Atg2-IR	3	2	0	219.455	No	1
Atg2-IR	3	2	0	511.215	Yes	2
Atg2-IR	3	2	0	251.308	No	2
Atg2-IR	3	2	0	303.387	No	2
Atg2-IR	3	2	0	339.149	No	2
Atg2-IR	3	2	0	213.495	No	2
Atg2-IR	3	2	0	243.882	No	2
Atg2-IR	4	2	0	211.541	Yes	1
Atg2-IR	4	2	0	125.85	No	1
Atg2-IR	4	2	0	114.124	No	1
Atg2-IR	4	2	0	155.846	No	1
Atg2-IR	4	2	0	256.291	No	1
Atg2-IR	4	2	0	107.773	No	1
Atg2-IR	5	2	1	402.66	Yes	1
Atg2-IR	5	2	1	130.149	No	1
Atg2-IR	5	2	1	106.601	No	1
Atg2-IR	5	2	1	113.343	No	1
Atg2-IR	5	2	1	102.204	No	1
Atg2-IR	5	2	1	67.615	No	1
Atg2-IR	5	2	0	439.985	Yes	1
Atg2-IR	5	2	0	134.937	No	1
Atg2-IR	5	2	0	178.124	No	1
Atg2-IR	5	2	0	176.658	No	1
Atg2-IR	5	2	0	93.117	No	1
Atg2-IR	5	2	0	232.353	No	1
