# Supplementary material for: Multiscale analysis reveals that diet-dependent midgut plasticity emerges from alterations in both stem cell niche coupling and enterocyte size
Source: eLife. 2021 Sep 23;10:e64125. doi: 10.7554/eLife.64125 (PMC8528489; doi:10.7554/eLife.64125)
Supplement: Figure 7—source data 5. [file elife-64125-fig7-data5.csv]

Female.Line	CrossNumber	Phase	Repeat	PhaseRep	Diet	Day	Group	C.G	Male.Line.ID	Male.Line	Gene	Total.L
Myo	3	T2	1	T2_1	HY	0	S	HY	34340	Atg8a-IR	Atg8a	3942.062
Myo	3	T2	1	T2_1	HY	0	S	HY	34340	Atg8a-IR	Atg8a	5800.174
Myo	3	T2	1	T2_1	HY	0	S	HY	34340	Atg8a-IR	Atg8a	4910.522
Myo	3	T2	1	T2_1	HY	0	S	HY	34340	Atg8a-IR	Atg8a	4865.705
Myo	3	T2	1	T2_1	HY	0	S	HY	34340	Atg8a-IR	Atg8a	5178.419
Myo	3	T2	1	T2_1	HY	0	S	HY	34340	Atg8a-IR	Atg8a	4603.819
Myo	3	T2	1	T2_1	HY	0	S	HY	34340	Atg8a-IR	Atg8a	5010.667
Myo	3	T2	1	T2_1	HY	0	S	HY	34340	Atg8a-IR	Atg8a	5385.82
Myo	3	T2	1	T2_1	HY	0	S	HY	34340	Atg8a-IR	Atg8a	4686.816
Myo	6	attp2	2	attp2_2	HY	0	S	HY	34340	Atg8a-IR	Atg8a	5638.789
Myo	6	attp2	2	attp2_2	HY	0	S	HY	34340	Atg8a-IR	Atg8a	5641.595
Myo	6	attp2	2	attp2_2	HY	0	S	HY	34340	Atg8a-IR	Atg8a	6503.164
Myo	6	attp2	2	attp2_2	HY	0	S	HY	34340	Atg8a-IR	Atg8a	6108.827
Myo	6	attp2	2	attp2_2	HY	0	S	HY	34340	Atg8a-IR	Atg8a	6160.509
Myo	6	attp2	2	attp2_2	HY	0	S	HY	34340	Atg8a-IR	Atg8a	4929.585
Myo	6	attp2	2	attp2_2	HY	0	S	HY	34340	Atg8a-IR	Atg8a	4806.363
Myo	6	attp2	2	attp2_2	HYtoHS	7	S	HS	34340	Atg8a-IR	Atg8a	4435.325
Myo	6	attp2	2	attp2_2	HYtoHS	7	S	HS	34340	Atg8a-IR	Atg8a	4290.064
Myo	6	attp2	2	attp2_2	HYtoHS	7	S	HS	34340	Atg8a-IR	Atg8a	4708.261
Myo	6	attp2	2	attp2_2	HYtoHS	7	S	HS	34340	Atg8a-IR	Atg8a	4263.073
Myo	6	attp2	2	attp2_2	HYtoHS	7	S	HS	34340	Atg8a-IR	Atg8a	3960.684
Myo	6	attp2	2	attp2_2	HYtoHS	7	S	HS	34340	Atg8a-IR	Atg8a	4032.135
Myo	6	attp2	2	attp2_2	HYtoHS	7	S	HS	34340	Atg8a-IR	Atg8a	3937.373
Myo	6	attp2	2	attp2_2	HYtoHS	7	S	HS	34340	Atg8a-IR	Atg8a	3688.284
Myo	6	attp2	2	attp2_2	HYtoHS	7	S	HS	34340	Atg8a-IR	Atg8a	3643.155
Myo	3	T2	1	T2_1	HYtoHS	7	S	HS	34340	Atg8a-IR	Atg8a	3863.814
Myo	3	T2	1	T2_1	HYtoHS	7	S	HS	34340	Atg8a-IR	Atg8a	3755.563
Myo	3	T2	1	T2_1	HYtoHS	7	S	HS	34340	Atg8a-IR	Atg8a	4194.358
Myo	3	T2	1	T2_1	HYtoHS	7	S	HS	34340	Atg8a-IR	Atg8a	4421.698
Myo	3	T2	1	T2_1	HYtoHS	7	S	HS	34340	Atg8a-IR	Atg8a	4562.765
Myo	3	T2	1	T2_1	HYtoHS	7	S	HS	34340	Atg8a-IR	Atg8a	4267.86
Myo	3	T2	1	T2_1	HYtoHS	7	S	HS	34340	Atg8a-IR	Atg8a	4408.604
Myo	3	T2	1	T2_1	HYtoHS	7	S	HS	34340	Atg8a-IR	Atg8a	3399.919
Myo	3	T2	1	T2_1	HYtoHS	7	S	HS	34340	Atg8a-IR	Atg8a	3893.969
Myo	3	T2	1	T2_1	HYtoHS	7	S	HS	34340	Atg8a-IR	Atg8a	5330.159
Myo	12	Last	A	Last_A	HYtoHS	7	S	HS	34340	Atg8a-IR	Atg8a	4694.164
Myo	12	Last	A	Last_A	HYtoHS	7	S	HS	34340	Atg8a-IR	Atg8a	3924.726
Myo	12	Last	A	Last_A	HYtoHS	7	S	HS	34340	Atg8a-IR	Atg8a	3594.512
Myo	12	Last	A	Last_A	HYtoHS	7	S	HS	34340	Atg8a-IR	Atg8a	3944.925
Myo	12	Last	A	Last_A	HYtoHS	7	S	HS	34340	Atg8a-IR	Atg8a	5398.824
Myo	12	Last	A	Last_A	HYtoHS	7	S	HS	34340	Atg8a-IR	Atg8a	3994.887
Myo	12	Last	A	Last_A	HYtoHS	7	S	HS	34340	Atg8a-IR	Atg8a	3993.504
Myo	12	Last	A	Last_A	HYtoHS	7	S	HS	34340	Atg8a-IR	Atg8a	4291.465
Myo	12	Last	A	Last_A	HYtoHS	7	S	HS	34340	Atg8a-IR	Atg8a	4099.526
Myo	12	Last	A	Last_A	HYtoHS	7	S	HS	34340	Atg8a-IR	Atg8a	3621.742
Myo	20	Last	B	Last_B	HYtoHS	7	S	HS	34340	Atg8a-IR	Atg8a	3800.791
Myo	20	Last	B	Last_B	HYtoHS	7	S	HS	34340	Atg8a-IR	Atg8a	3696.72
Myo	20	Last	B	Last_B	HYtoHS	7	S	HS	34340	Atg8a-IR	Atg8a	4441.392
Myo	20	Last	B	Last_B	HYtoHS	7	S	HS	34340	Atg8a-IR	Atg8a	3524.778
Myo	20	Last	B	Last_B	HYtoHS	7	S	HS	34340	Atg8a-IR	Atg8a	3517
Myo	20	Last	B	Last_B	HYtoHS	7	S	HS	34340	Atg8a-IR	Atg8a	4145.566
Myo	12	Last	A	Last_A	HY	0	S	HY	34340	Atg8a-IR	Atg8a	4963.429
Myo	12	Last	A	Last_A	HY	0	S	HY	34340	Atg8a-IR	Atg8a	4991.923
Myo	12	Last	A	Last_A	HY	0	S	HY	34340	Atg8a-IR	Atg8a	5173.8
Myo	12	Last	A	Last_A	HY	0	S	HY	34340	Atg8a-IR	Atg8a	4519.493
Myo	12	Last	A	Last_A	HY	0	S	HY	34340	Atg8a-IR	Atg8a	5235.504
Myo	12	Last	A	Last_A	HY	0	S	HY	34340	Atg8a-IR	Atg8a	4629.004
Myo	12	Last	A	Last_A	HY	0	S	HY	34340	Atg8a-IR	Atg8a	4112.043
Myo	12	Last	A	Last_A	HY	0	S	HY	34340	Atg8a-IR	Atg8a	4138.723
Myo	20	Last	B	Last_B	HY	0	S	HY	34340	Atg8a-IR	Atg8a	4859.457
Myo	20	Last	B	Last_B	HY	0	S	HY	34340	Atg8a-IR	Atg8a	6027.115
Myo	20	Last	B	Last_B	HY	0	S	HY	34340	Atg8a-IR	Atg8a	4941.885
Myo	20	Last	B	Last_B	HY	0	S	HY	34340	Atg8a-IR	Atg8a	5094.493
Myo	20	Last	B	Last_B	HY	0	S	HY	34340	Atg8a-IR	Atg8a	5013.523
Myo	20	Last	B	Last_B	HY	0	S	HY	34340	Atg8a-IR	Atg8a	4682.743
Myo	20	Last	B	Last_B	HY	0	S	HY	34340	Atg8a-IR	Atg8a	4580.512
Myo	20	Last	B	Last_B	HY	0	S	HY	34340	Atg8a-IR	Atg8a	5121.067
Myo	9	attp2	2	attp2_2	HY	0	S	HY	Cs	Control	Control	4801.573
Myo	9	attp2	2	attp2_2	HY	0	S	HY	Cs	Control	Control	5009.035
Myo	9	attp2	2	attp2_2	HY	0	S	HY	Cs	Control	Control	5256.42
Myo	9	attp2	2	attp2_2	HY	0	S	HY	Cs	Control	Control	5297.678
Myo	9	attp2	2	attp2_2	HY	0	S	HY	Cs	Control	Control	5337.232
Myo	1	T2	1	T2_1	HY	0	S	HY	Cs	Control	Control	5617.028
Myo	9	attp2	2	attp2_2	HY	0	S	HY	Cs	Control	Control	5633.895
Myo	9	attp2	2	attp2_2	HY	0	S	HY	Cs	Control	Control	5758.22
Myo	1	T2	1	T2_1	HY	0	S	HY	Cs	Control	Control	5855.115
Myo	9	attp2	2	attp2_2	HY	0	S	HY	Cs	Control	Control	5924.62
Myo	1	T2	1	T2_1	HY	0	S	HY	Cs	Control	Control	5989.586
Myo	1	T2	1	T2_1	HY	0	S	HY	Cs	Control	Control	6009.52
Myo	1	T2	1	T2_1	HY	0	S	HY	Cs	Control	Control	6114.659
Myo	1	T2	1	T2_1	HY	0	S	HY	Cs	Control	Control	6340.694
Myo	1	T2	1	T2_1	HY	0	S	HY	Cs	Control	Control	6374.102
Myo	9	attp2	2	attp2_2	HY	0	S	HY	Cs	Control	Control	6661.712
Myo	1	T2	1	T2_1	HYtoHS	7	S	HS	Cs	Control	Control	4412.933
Myo	1	T2	1	T2_1	HYtoHS	7	S	HS	Cs	Control	Control	4088.133
Myo	9	attp2	2	attp2_2	HYtoHS	7	S	HS	Cs	Control	Control	4043.869
Myo	9	attp2	2	attp2_2	HYtoHS	7	S	HS	Cs	Control	Control	3977.947
Myo	9	attp2	2	attp2_2	HYtoHS	7	S	HS	Cs	Control	Control	3961.618
Myo	9	attp2	2	attp2_2	HYtoHS	7	S	HS	Cs	Control	Control	3917.153
Myo	1	T2	1	T2_1	HYtoHS	7	S	HS	Cs	Control	Control	3910.447
Myo	1	T2	1	T2_1	HYtoHS	7	S	HS	Cs	Control	Control	3736.403
Myo	9	attp2	2	attp2_2	HYtoHS	7	S	HS	Cs	Control	Control	3729.357
Myo	9	attp2	2	attp2_2	HYtoHS	7	S	HS	Cs	Control	Control	3714.047
Myo	1	T2	1	T2_1	HYtoHS	7	S	HS	Cs	Control	Control	3699.844
Myo	9	attp2	2	attp2_2	HYtoHS	7	S	HS	Cs	Control	Control	3698.601
Myo	1	T2	1	T2_1	HYtoHS	7	S	HS	Cs	Control	Control	3562.785
Myo	9	attp2	2	attp2_2	HYtoHS	7	S	HS	Cs	Control	Control	3473.026
Myo	1	T2	1	T2_1	HYtoHS	7	S	HS	Cs	Control	Control	3373.75
Myo	9	attp2	2	attp2_2	HYtoHS	7	S	HS	Cs	Control	Control	3306.109
Myo	1	T2	1	T2_1	HYtoHS	7	S	HS	Cs	Control	Control	3290.57
Myo	1	T2	1	T2_1	HYtoHS	7	S	HS	Cs	Control	Control	3169.01
Myo	9	attp2	2	attp2_2	HYtoHS	7	S	HS	Cs	Control	Control	3030.191
Myo	22	Last	B	Last_B	HY	0	S	HY	Cs	Control	Control	5465.232
Myo	22	Last	B	Last_B	HY	0	S	HY	Cs	Control	Control	4878.952
Myo	22	Last	B	Last_B	HY	0	S	HY	Cs	Control	Control	5598.001
Myo	22	Last	B	Last_B	HY	0	S	HY	Cs	Control	Control	4714.646
Myo	22	Last	B	Last_B	HY	0	S	HY	Cs	Control	Control	6206.415
Myo	22	Last	B	Last_B	HY	0	S	HY	Cs	Control	Control	4681.814
Myo	22	Last	B	Last_B	HY	0	S	HY	Cs	Control	Control	5349.842
Myo	22	Last	B	Last_B	HY	0	S	HY	Cs	Control	Control	6107.331
Myo	22	Last	B	Last_B	HY	0	S	HY	Cs	Control	Control	5597.782
Myo	22	Last	B	Last_B	HYtoHS	7	S	HS	Cs	Control	Control	4052.56
Myo	22	Last	B	Last_B	HYtoHS	7	S	HS	Cs	Control	Control	3840.778
Myo	22	Last	B	Last_B	HYtoHS	7	S	HS	Cs	Control	Control	3683.885
Myo	22	Last	B	Last_B	HYtoHS	7	S	HS	Cs	Control	Control	3828.391
Myo	22	Last	B	Last_B	HYtoHS	7	S	HS	Cs	Control	Control	3946.167
Myo	22	Last	B	Last_B	HYtoHS	7	S	HS	Cs	Control	Control	3927.269
Myo	22	Last	B	Last_B	HYtoHS	7	S	HS	Cs	Control	Control	4439.492
Myo	22	Last	B	Last_B	HYtoHS	7	S	HS	Cs	Control	Control	4298.114
Myo	22	Last	B	Last_B	HYtoHS	7	S	HS	Cs	Control	Control	3964.375
Myo	8	Last	A	Last_A	HY	0	S	HY	Cs	Control	Control	5588.132
Myo	8	Last	A	Last_A	HY	0	S	HY	Cs	Control	Control	4828.193
Myo	8	Last	A	Last_A	HY	0	S	HY	Cs	Control	Control	5933.892
Myo	8	Last	A	Last_A	HY	0	S	HY	Cs	Control	Control	5278.813
Myo	8	Last	A	Last_A	HY	0	S	HY	Cs	Control	Control	5381.138
Myo	8	Last	A	Last_A	HY	0	S	HY	Cs	Control	Control	5425.122
Myo	8	Last	A	Last_A	HY	0	S	HY	Cs	Control	Control	5273.398
Myo	8	Last	A	Last_A	HY	0	S	HY	Cs	Control	Control	4552.936
Myo	8	Last	A	Last_A	HYtoHS	7	S	HS	Cs	Control	Control	3931.605
Myo	8	Last	A	Last_A	HYtoHS	7	S	HS	Cs	Control	Control	4121.94
Myo	8	Last	A	Last_A	HYtoHS	7	S	HS	Cs	Control	Control	4232.253
Myo	8	Last	A	Last_A	HYtoHS	7	S	HS	Cs	Control	Control	3999.74
Myo	8	Last	A	Last_A	HYtoHS	7	S	HS	Cs	Control	Control	3228.938
Myo	8	Last	A	Last_A	HYtoHS	7	S	HS	Cs	Control	Control	3534.198
Myo	8	Last	A	Last_A	HYtoHS	7	S	HS	Cs	Control	Control	2740.432
Myo	8	Last	A	Last_A	HYtoHS	7	S	HS	Cs	Control	Control	3677.396
Myo	8	Last	A	Last_A	HYtoHS	7	S	HS	Cs	Control	Control	3375.871
