# Supplementary material for: Multiscale analysis reveals that diet-dependent midgut plasticity emerges from alterations in both stem cell niche coupling and enterocyte size
Source: eLife. 2021 Sep 23;10:e64125. doi: 10.7554/eLife.64125 (PMC8528489; doi:10.7554/eLife.64125)
Supplement: Figure 7—source data 6. [file elife-64125-fig7-data6.csv]

Female.Line	Phase	Repeat	PhaseRep	Diet	Day	Group	C.G	Male.Line.ID	Male.Line	Gene	Total.W
Myo	T2	1	T2_1	HY	0	S	HY	34719	Atg2-IR	Atg2	523.537
Myo	T2	1	T2_1	HY	0	S	HY	34719	Atg2-IR	Atg2	556.588
Myo	T2	1	T2_1	HY	0	S	HY	34719	Atg2-IR	Atg2	527.946
Myo	T2	1	T2_1	HY	0	S	HY	34719	Atg2-IR	Atg2	596.766
Myo	T2	1	T2_1	HY	0	S	HY	34719	Atg2-IR	Atg2	492.113
Myo	T2	1	T2_1	HY	0	S	HY	34719	Atg2-IR	Atg2	549.828
Myo	attp2	2	attp2_2	HY	0	S	HY	34719	Atg2-IR	Atg2	591.281
Myo	attp2	2	attp2_2	HY	0	S	HY	34719	Atg2-IR	Atg2	717.603
Myo	attp2	2	attp2_2	HY	0	S	HY	34719	Atg2-IR	Atg2	663.59
Myo	attp2	2	attp2_2	HY	0	S	HY	34719	Atg2-IR	Atg2	588.591
Myo	attp2	2	attp2_2	HY	0	S	HY	34719	Atg2-IR	Atg2	614.137
Myo	attp2	2	attp2_2	HY	0	S	HY	34719	Atg2-IR	Atg2	621.214
Myo	attp2	2	attp2_2	HY	0	S	HY	34719	Atg2-IR	Atg2	692.085
Myo	attp2	2	attp2_2	HY	0	S	HY	34719	Atg2-IR	Atg2	707.5
Myo	attp2	2	attp2_2	HY	0	S	HY	34719	Atg2-IR	Atg2	697.214
Myo	T2	1	T2_1	HYtoHS	7	S	HS	34719	Atg2-IR	Atg2	565.339
Myo	T2	1	T2_1	HYtoHS	7	S	HS	34719	Atg2-IR	Atg2	515.971
Myo	T2	1	T2_1	HYtoHS	7	S	HS	34719	Atg2-IR	Atg2	550.021
Myo	T2	1	T2_1	HYtoHS	7	S	HS	34719	Atg2-IR	Atg2	520.331
Myo	T2	1	T2_1	HYtoHS	7	S	HS	34719	Atg2-IR	Atg2	569.52
Myo	T2	1	T2_1	HYtoHS	7	S	HS	34719	Atg2-IR	Atg2	549.04
Myo	T2	1	T2_1	HYtoHS	7	S	HS	34719	Atg2-IR	Atg2	536.404
Myo	T2	1	T2_1	HYtoHS	7	S	HS	34719	Atg2-IR	Atg2	541.174
Myo	T2	1	T2_1	HYtoHS	7	S	HS	34719	Atg2-IR	Atg2	548.334
Myo	attp2	2	attp2_2	HYtoHS	7	S	HS	34719	Atg2-IR	Atg2	435.733
Myo	attp2	2	attp2_2	HYtoHS	7	S	HS	34719	Atg2-IR	Atg2	445.556
Myo	attp2	2	attp2_2	HYtoHS	7	S	HS	34719	Atg2-IR	Atg2	469.107
Myo	attp2	2	attp2_2	HYtoHS	7	S	HS	34719	Atg2-IR	Atg2	441.198
Myo	attp2	2	attp2_2	HYtoHS	7	S	HS	34719	Atg2-IR	Atg2	434.738
Myo	attp2	2	attp2_2	HYtoHS	7	S	HS	34719	Atg2-IR	Atg2	489.09
Myo	attp2	2	attp2_2	HYtoHS	7	S	HS	34719	Atg2-IR	Atg2	459.248
Myo	attp2	2	attp2_2	HYtoHS	7	S	HS	34719	Atg2-IR	Atg2	454.725
Myo	attp2	2	attp2_2	HYtoHS	7	S	HS	34719	Atg2-IR	Atg2	403.142
Myo	attp2	2	attp2_2	HYtoHS	7	S	HS	34719	Atg2-IR	Atg2	419.813
Myo	Last	A	Last_A	HYtoHS	7	S	HS	34719	Atg2-IR	Atg2	607.586
Myo	Last	A	Last_A	HYtoHS	7	S	HS	34719	Atg2-IR	Atg2	555.62
Myo	Last	A	Last_A	HYtoHS	7	S	HS	34719	Atg2-IR	Atg2	619.6
Myo	Last	A	Last_A	HYtoHS	7	S	HS	34719	Atg2-IR	Atg2	598.158
Myo	Last	A	Last_A	HYtoHS	7	S	HS	34719	Atg2-IR	Atg2	519.636
Myo	Last	A	Last_A	HYtoHS	7	S	HS	34719	Atg2-IR	Atg2	602.032
Myo	Last	A	Last_A	HYtoHS	7	S	HS	34719	Atg2-IR	Atg2	512.98
Myo	Last	A	Last_A	HYtoHS	7	S	HS	34719	Atg2-IR	Atg2	497.358
Myo	Last	A	Last_A	HYtoHS	7	S	HS	34719	Atg2-IR	Atg2	560.565
Myo	Last	A	Last_A	HYtoHS	7	S	HS	34719	Atg2-IR	Atg2	616.127
Myo	Last	A	Last_A	HY	0	S	HY	34719	Atg2-IR	Atg2	686.859
Myo	Last	A	Last_A	HY	0	S	HY	34719	Atg2-IR	Atg2	603.733
Myo	Last	A	Last_A	HY	0	S	HY	34719	Atg2-IR	Atg2	706.837
Myo	Last	A	Last_A	HY	0	S	HY	34719	Atg2-IR	Atg2	600.784
Myo	Last	A	Last_A	HY	0	S	HY	34719	Atg2-IR	Atg2	700.074
Myo	Last	A	Last_A	HY	0	S	HY	34719	Atg2-IR	Atg2	575.866
Myo	Last	B	Last_B	HY	0	S	HY	34719	Atg2-IR	Atg2	727.315
Myo	Last	B	Last_B	HY	0	S	HY	34719	Atg2-IR	Atg2	766.757
Myo	Last	B	Last_B	HY	0	S	HY	34719	Atg2-IR	Atg2	752.143
Myo	Last	B	Last_B	HY	0	S	HY	34719	Atg2-IR	Atg2	707.737
Myo	Last	B	Last_B	HY	0	S	HY	34719	Atg2-IR	Atg2	729.809
Myo	Last	B	Last_B	HY	0	S	HY	34719	Atg2-IR	Atg2	679.372
Myo	Last	B	Last_B	HY	0	S	HY	34719	Atg2-IR	Atg2	832.986
Myo	Last	B	Last_B	HY	0	S	HY	34719	Atg2-IR	Atg2	728.91
Myo	Last	B	Last_B	HY	0	S	HY	34719	Atg2-IR	Atg2	770.528
Myo	Last	B	Last_B	HYtoHS	7	S	HS	34719	Atg2-IR	Atg2	539.048
Myo	Last	B	Last_B	HYtoHS	7	S	HS	34719	Atg2-IR	Atg2	529.471
Myo	Last	B	Last_B	HYtoHS	7	S	HS	34719	Atg2-IR	Atg2	529.961
Myo	Last	B	Last_B	HYtoHS	7	S	HS	34719	Atg2-IR	Atg2	527.87
Myo	Last	B	Last_B	HYtoHS	7	S	HS	34719	Atg2-IR	Atg2	564.094
Myo	Last	B	Last_B	HYtoHS	7	S	HS	34719	Atg2-IR	Atg2	611.356
Myo	Last	B	Last_B	HYtoHS	7	S	HS	34719	Atg2-IR	Atg2	590.059
Myo	Last	B	Last_B	HYtoHS	7	S	HS	34719	Atg2-IR	Atg2	546.856
Myo	Last	B	Last_B	HYtoHS	7	S	HS	34719	Atg2-IR	Atg2	481.909
Myo	attp2	2	attp2_2	HY	0	S	HY	Cs	Control	Control	498.355
Myo	attp2	2	attp2_2	HY	0	S	HY	Cs	Control	Control	499.477
Myo	attp2	2	attp2_2	HY	0	S	HY	Cs	Control	Control	481.565
Myo	attp2	2	attp2_2	HY	0	S	HY	Cs	Control	Control	610.076
Myo	attp2	2	attp2_2	HY	0	S	HY	Cs	Control	Control	483.181
Myo	T2	1	T2_1	HY	0	S	HY	Cs	Control	Control	550.272
Myo	attp2	2	attp2_2	HY	0	S	HY	Cs	Control	Control	538.799
Myo	attp2	2	attp2_2	HY	0	S	HY	Cs	Control	Control	528.699
Myo	T2	1	T2_1	HY	0	S	HY	Cs	Control	Control	466.267
Myo	attp2	2	attp2_2	HY	0	S	HY	Cs	Control	Control	468.994
Myo	T2	1	T2_1	HY	0	S	HY	Cs	Control	Control	462.247
Myo	T2	1	T2_1	HY	0	S	HY	Cs	Control	Control	539.455
Myo	T2	1	T2_1	HY	0	S	HY	Cs	Control	Control	644.889
Myo	T2	1	T2_1	HY	0	S	HY	Cs	Control	Control	426.292
Myo	T2	1	T2_1	HY	0	S	HY	Cs	Control	Control	506.27
Myo	attp2	2	attp2_2	HY	0	S	HY	Cs	Control	Control	526.71
Myo	T2	1	T2_1	HYtoHS	7	S	HS	Cs	Control	Control	332.885
Myo	T2	1	T2_1	HYtoHS	7	S	HS	Cs	Control	Control	316.205
Myo	attp2	2	attp2_2	HYtoHS	7	S	HS	Cs	Control	Control	354.116
Myo	attp2	2	attp2_2	HYtoHS	7	S	HS	Cs	Control	Control	389.488
Myo	attp2	2	attp2_2	HYtoHS	7	S	HS	Cs	Control	Control	448.564
Myo	attp2	2	attp2_2	HYtoHS	7	S	HS	Cs	Control	Control	436.802
Myo	T2	1	T2_1	HYtoHS	7	S	HS	Cs	Control	Control	351.099
Myo	T2	1	T2_1	HYtoHS	7	S	HS	Cs	Control	Control	350.612
Myo	attp2	2	attp2_2	HYtoHS	7	S	HS	Cs	Control	Control	459.826
Myo	attp2	2	attp2_2	HYtoHS	7	S	HS	Cs	Control	Control	313.873
Myo	T2	1	T2_1	HYtoHS	7	S	HS	Cs	Control	Control	388.367
Myo	attp2	2	attp2_2	HYtoHS	7	S	HS	Cs	Control	Control	404.41
Myo	T2	1	T2_1	HYtoHS	7	S	HS	Cs	Control	Control	356.131
Myo	attp2	2	attp2_2	HYtoHS	7	S	HS	Cs	Control	Control	418.857
Myo	T2	1	T2_1	HYtoHS	7	S	HS	Cs	Control	Control	355.705
Myo	attp2	2	attp2_2	HYtoHS	7	S	HS	Cs	Control	Control	363.592
Myo	T2	1	T2_1	HYtoHS	7	S	HS	Cs	Control	Control	371.325
Myo	T2	1	T2_1	HYtoHS	7	S	HS	Cs	Control	Control	358.452
Myo	attp2	2	attp2_2	HYtoHS	7	S	HS	Cs	Control	Control	300.122
Myo	Last	B	Last_B	HY	0	S	HY	Cs	Control	Control	581.462
Myo	Last	B	Last_B	HY	0	S	HY	Cs	Control	Control	491.016
Myo	Last	B	Last_B	HY	0	S	HY	Cs	Control	Control	537.984
Myo	Last	B	Last_B	HY	0	S	HY	Cs	Control	Control	525.46
Myo	Last	B	Last_B	HY	0	S	HY	Cs	Control	Control	556.726
Myo	Last	B	Last_B	HY	0	S	HY	Cs	Control	Control	550.861
Myo	Last	B	Last_B	HY	0	S	HY	Cs	Control	Control	472.086
Myo	Last	B	Last_B	HY	0	S	HY	Cs	Control	Control	663.841
Myo	Last	B	Last_B	HY	0	S	HY	Cs	Control	Control	585.083
Myo	Last	B	Last_B	HYtoHS	7	S	HS	Cs	Control	Control	337.65
Myo	Last	B	Last_B	HYtoHS	7	S	HS	Cs	Control	Control	389.9
Myo	Last	B	Last_B	HYtoHS	7	S	HS	Cs	Control	Control	388.918
Myo	Last	B	Last_B	HYtoHS	7	S	HS	Cs	Control	Control	347.412
Myo	Last	B	Last_B	HYtoHS	7	S	HS	Cs	Control	Control	321.736
Myo	Last	B	Last_B	HYtoHS	7	S	HS	Cs	Control	Control	423.746
Myo	Last	B	Last_B	HYtoHS	7	S	HS	Cs	Control	Control	424.982
Myo	Last	B	Last_B	HYtoHS	7	S	HS	Cs	Control	Control	406.015
Myo	Last	B	Last_B	HYtoHS	7	S	HS	Cs	Control	Control	367.51
Myo	Last	A	Last_A	HY	0	S	HY	Cs	Control	Control	591.614
Myo	Last	A	Last_A	HY	0	S	HY	Cs	Control	Control	558.625
Myo	Last	A	Last_A	HY	0	S	HY	Cs	Control	Control	572.862
Myo	Last	A	Last_A	HY	0	S	HY	Cs	Control	Control	546.222
Myo	Last	A	Last_A	HY	0	S	HY	Cs	Control	Control	603.472
Myo	Last	A	Last_A	HY	0	S	HY	Cs	Control	Control	678.576
Myo	Last	A	Last_A	HY	0	S	HY	Cs	Control	Control	548.466
Myo	Last	A	Last_A	HY	0	S	HY	Cs	Control	Control	684.197
Myo	Last	A	Last_A	HYtoHS	7	S	HS	Cs	Control	Control	406.128
Myo	Last	A	Last_A	HYtoHS	7	S	HS	Cs	Control	Control	371.32
Myo	Last	A	Last_A	HYtoHS	7	S	HS	Cs	Control	Control	482.439
Myo	Last	A	Last_A	HYtoHS	7	S	HS	Cs	Control	Control	460.079
Myo	Last	A	Last_A	HYtoHS	7	S	HS	Cs	Control	Control	368.079
Myo	Last	A	Last_A	HYtoHS	7	S	HS	Cs	Control	Control	421.991
Myo	Last	A	Last_A	HYtoHS	7	S	HS	Cs	Control	Control	461.82
Myo	Last	A	Last_A	HYtoHS	7	S	HS	Cs	Control	Control	426.581
Myo	Last	A	Last_A	HYtoHS	7	S	HS	Cs	Control	Control	384.758
